# Supplementary material for: Arabidopsis transcriptome responses to low water potential using high throughput plate assays
Source: bioRxiv preprint, doi:10.1101/2022.11.25.517922, version 3 (2024-03-25)
Supplement: Supplementary File 2 [file 517922_file03.xlsx]

## Sheet: Root - Dose Responsive Genes
Table S2 - Gene expression responses performed with the following analyses:
Differentially expressed genes responsive to water deficit or agar media stress in a dose responsive manner in root tissue
Differentially expressed genes responsive to water deficit or agar media stress in a dose responsive manner in shoot tissue
Differentially expressed genes responsive to water deficit or agar media stress within each individual level of stress (pairwise comparison) in root tissue
Differentially expressed genes responsive to water deficit or agar media stress within each individual level of stress (pairwise comparison) in shoot tissue
Normalized read counts for each sequenced replicate in root tissue
Normalized read counts for each sequenced replicate in shoot tissue
Figure 2A heatmap directional concordant responses and gene names
Figure 2B heatmap directional concordant responses and gene names
Vermiculite Drying - 1949 genes				Hard Agar - 1376 genes				PEG - 1599 genes				Mannitol - 1240 genes				NaCl - 4226 genes
Gene	log2FoldChange	padj		Gene	log2FoldChange	padj		Gene	log2FoldChange	padj		Gene	log2FoldChange	padj		Gene	log2FoldChange	padj
AT1G51140	0.0439356	1.85654e-71		AT2G37870	0.065839	4.00966e-49		AT3G32030	-0.125368	8.08612e-44		AT3G45130	-0.010162	3.55893e-33		AT2G19900	0.0231145	1.03661e-86
AT5G48010	0.084184	1.15051e-56		AT5G13370	0.0334353	1.10567e-36		AT1G78850	-0.0441935	1.12016e-27		AT3G29410	-0.0136041	1.60899e-21		AT4G12470	0.0458673	3.22573e-64
AT1G58270	0.0503549	5.66357e-52		AT4G33550	0.0628594	5.37011e-29		AT3G28740	-0.0543944	1.06956e-21		AT3G52970	-0.00942142	2.47958e-21		AT1G64110	0.0202264	4.59261e-62
AT2G38750	0.0671532	1.27827e-47		AT5G59320	0.0455827	1.22233e-28		AT4G33720	-0.136963	1.42547e-21		AT4G02270	-0.0153247	2.8993e-21		AT1G02850	0.00987384	5.99825e-57
AT5G48000	0.0623526	1.27827e-47		AT4G02360	0.0295749	3.44778e-28		AT1G65370	0.0514548	2.61511e-21		AT3G20300	0.00949188	2.07042e-20		AT1G69880	0.0227851	1.83673e-54
AT5G47990	0.0750511	3.27811e-47		AT2G28970	-0.0334927	1.1723e-26		AT5G24530	-0.0480529	5.26879e-21		AT3G30260	-0.020503	2.72175e-20		AT5G13370	0.013715	4.86321e-54
AT4G22214	0.0739084	1.46372e-43		AT5G13490	0.0164322	1.1723e-26		AT4G22960	0.0948495	8.74886e-21		AT5G49360	-0.00903815	9.24537e-20		AT4G08300	-0.0359248	3.19258e-51
AT3G48340	0.0496888	1.54561e-43		AT5G25610	0.0399372	1.1723e-26		AT1G78230	-0.104483	4.85204e-20		AT5G40800	0.0106801	2.22246e-19		AT1G18100	0.0206944	2.00397e-47
AT2G17500	0.0544317	4.64456e-43		AT1G09310	0.0636361	1.20897e-26		AT4G13770	-0.0657556	4.85204e-20		AT1G56600	0.0168154	2.18289e-18		AT3G16390	-0.0206548	1.00637e-45
AT1G47128	0.0322161	6.02927e-40		AT4G24960	0.0240633	1.23804e-25		AT5G24280	0.103241	8.29113e-20		AT3G16390	-0.00704587	2.18289e-18		AT5G10580	0.0104199	1.19611e-44
AT4G16190	0.041975	2.94574e-39		AT1G75280	0.0245078	1.88785e-25		AT1G68620	-0.0570744	2.86141e-18		AT1G13710	-0.0131083	7.91143e-18		AT1G26450	0.0104499	7.73695e-42
AT5G59220	0.094956	1.33687e-38		AT4G13770	-0.0302225	9.30979e-25		AT3G02020	-0.05289	3.10853e-18		AT1G64110	0.00927958	1.80147e-16		AT3G63380	-0.015977	4.91322e-38
AT2G39800	0.0440828	2.07016e-38		AT2G37760	0.0146566	5.98936e-24		AT3G54600	-0.0468247	1.04683e-17		AT1G66800	-0.00793217	2.08855e-16		AT2G38940	0.0117242	9.27838e-37
AT1G70850	0.0362611	6.90056e-37		AT1G02205	0.0461049	1.34273e-23		AT2G45220	-0.0476134	1.38618e-17		AT5G39110	0.0113713	2.08855e-16		AT4G03280	0.0135414	1.30925e-35
AT5G38940	-0.111035	8.98906e-37		AT4G11350	0.0226952	2.24405e-23		AT5G43330	0.0689188	1.5566e-17		AT1G18870	-0.0108514	2.8172e-16		AT5G36130	-0.023555	1.34498e-35
AT5G04730	-0.0823363	1.90941e-34		AT5G47880	0.0133733	2.82772e-23		AT1G23760	-0.0687852	6.60925e-17		AT1G47530	0.00486641	4.93813e-16		AT4G10340	0.0109062	4.22323e-34
AT5G11110	0.0606228	2.81188e-34		AT1G71880	-0.0293492	1.21871e-22		AT1G67810	-0.0528136	1.65929e-16		AT3G45730	0.0119814	4.93813e-16		AT1G14520	0.022673	7.75355e-34
AT1G66700	0.0610676	4.19987e-34		AT2G05510	0.0371405	1.56952e-22		AT3G20110	-0.0941926	2.01672e-16		AT3G09600	0.00854612	5.95151e-16		AT1G49570	0.0311821	9.78064e-34
AT5G15120	-0.0803777	2.4172e-33		AT1G68040	-0.0296928	1.83369e-22		AT5G01550	-0.0604783	4.35975e-16		AT4G25820	-0.0117177	5.95151e-16		AT3G20100	0.00766496	4.92069e-33
AT5G60520	-0.0552413	2.4453e-33		AT4G08300	-0.103061	2.46804e-21		AT1G31710	-0.0549946	8.86978e-16		AT4G25410	-0.00985666	7.92637e-16		AT1G16850	0.0196261	8.64823e-33
AT3G10040	-0.0893008	1.37398e-32		AT5G39050	0.0251211	7.28946e-21		AT4G37010	-0.0447359	9.8349e-16		AT3G43190	-0.0100502	2.7561e-15		AT1G06680	0.0088535	1.11094e-32
AT2G36690	-0.0672234	1.43226e-32		AT1G56600	0.0642027	8.65284e-21		AT2G13810	-0.0759542	2.94799e-15		AT1G78070	0.00566997	2.9966e-15		AT2G27550	0.0132719	2.22182e-32
AT5G42590	0.0659799	2.86348e-32		AT3G18830	0.0213808	4.54918e-20		AT2G46750	-0.0553232	4.14824e-15		AT4G08300	-0.00970715	5.55792e-15		AT1G01190	-0.0163339	3.86013e-32
AT4G12330	0.0571206	6.02285e-32		AT5G65990	0.0253689	1.25946e-19		AT4G24340	-0.0740008	5.17121e-15		AT5G39100	0.0180482	1.17371e-14		AT1G25530	0.0114059	5.99422e-32
AT4G34950	-0.0535012	3.42283e-31		AT3G26610	-0.025282	1.45014e-19		AT3G25190	-0.0612521	5.65511e-15		AT5G04960	-0.0106072	1.80292e-14		AT4G24960	0.0109655	6.83503e-32
AT2G28850	-0.142449	5.46439e-31		AT3G08860	0.02614	2.12033e-19		AT3G27060	0.0490692	7.01735e-15		AT1G02220	0.00729956	2.97496e-14		AT5G40780	0.0129457	7.25145e-32
AT4G27410	0.0648867	6.67179e-31		AT5G53120	0.0156394	2.13639e-19		AT1G14220	-0.066097	8.53014e-15		AT5G59220	0.010838	3.08024e-14		AT5G06760	0.0232728	4.0747e-31
AT4G39795	0.05765	6.67179e-31		AT3G52970	-0.0298209	2.48952e-19		AT5G39850	0.0549143	1.08657e-14		AT1G52400	0.00818587	4.77571e-14		AT4G02280	0.0121718	1.43171e-30
AT4G01970	-0.0820108	2.18386e-30		AT5G40800	0.0340612	5.482e-19		AT1G16120	-0.0705157	1.75024e-14		AT3G29250	-0.00643024	6.20926e-14		AT1G77120	0.0102788	3.5595e-30
AT2G25160	0.0462945	3.5471e-30		AT2G29460	0.0281038	2.86805e-18		AT5G23050	-0.0616822	2.03673e-14		AT1G68040	-0.0103068	1.28707e-13		AT3G20300	0.0138341	3.5595e-30
AT2G38760	0.0553098	3.5471e-30		AT5G06730	0.0241141	3.17377e-18		AT2G39210	-0.0388086	3.20588e-14		AT5G48070	-0.00886893	1.53371e-13		AT1G54890	0.0255254	5.54268e-30
AT4G33070	-0.102266	1.93532e-29		AT5G66780	0.0404603	4.89447e-18		AT5G19600	-0.0613034	3.20588e-14		AT1G14960	-0.00905479	2.19797e-13		AT1G61520	0.0108109	1.10499e-29
AT3G23150	-0.0684277	2.77658e-29		AT1G09090	-0.0254607	4.94575e-18		AT1G23850	-0.0859642	5.0415e-14		AT5G10580	0.00556515	2.9459e-13		AT2G43020	0.00637221	4.40606e-29
AT4G37700	0.0757749	9.9095e-29		AT1G12010	-0.033319	7.87594e-18		AT5G60250	0.0913134	1.19068e-13		AT5G16970	0.0102998	3.48541e-13		AT5G58330	0.0120399	2.09672e-28
AT1G43800	-0.124626	1.49512e-28		AT3G13760	-0.0367132	8.29428e-18		AT3G20100	-0.0302089	1.99343e-13		AT2G05380	0.00962136	1.62726e-12		AT1G22990	0.0153965	3.84449e-28
AT5G39890	-0.105047	2.6781e-28		AT1G64110	0.0463595	1.19739e-17		AT2G01950	-0.0383805	2.15937e-13		AT1G18140	-0.00673529	2.67086e-12		AT5G39850	0.00790618	1.07407e-27
AT2G16060	-0.102473	4.86439e-28		AT1G49860	-0.0542439	1.75382e-17		AT2G36430	-0.0711411	2.37085e-13		AT5G36150	-0.0147503	2.67086e-12		AT2G37760	0.00639974	1.10019e-27
AT2G19900	0.0954255	1.24476e-27		AT3G51750	0.0359663	2.11528e-17		AT3G56980	-0.0705935	2.39151e-13		AT5G08050	0.00638633	2.79839e-12		AT3G26590	0.00680681	1.44792e-27
AT5G28510	0.0786206	3.76004e-27		AT1G01190	-0.0334458	2.64893e-17		AT4G19160	-0.0288058	2.39151e-13		AT5G48000	-0.00768319	3.651e-12		AT5G53120	0.00769686	1.54693e-27
AT5G38930	-0.15371	6.53608e-27		AT1G60730	0.0157913	6.22255e-17		AT1G16400	-0.0402609	5.39961e-13		AT1G14220	-0.00715722	4.47876e-12		AT2G39800	0.0108039	2.81258e-27
AT1G77120	-0.110864	6.75983e-27		AT5G45380	-0.0240892	6.22255e-17		AT1G64940	-0.0577311	5.57941e-13		AT3G27250	0.0122832	4.47876e-12		AT3G50970	0.00873792	2.97055e-27
AT2G16005	0.0757057	1.11157e-26		AT2G18150	0.0187343	7.93273e-17		AT5G04150	-0.11501	6.0366e-13		AT3G13760	-0.00981546	4.77974e-12		AT3G14280	0.00938214	5.17589e-27
AT1G33840	-0.0765754	1.25882e-26		AT5G26220	0.0269132	9.04365e-17		AT4G33150	-0.0358486	8.08305e-13		AT5G13370	0.0103026	5.78703e-12		AT3G51000	0.00745274	5.17589e-27
AT4G33560	-0.113638	1.46791e-26		AT1G68530	0.0280877	1.10243e-16		AT5G18670	-0.0657262	8.13005e-13		AT2G29340	0.00968362	8.87546e-12		AT5G36150	-0.0260654	5.45833e-27
AT1G05700	-0.0708357	1.07433e-25		AT3G57010	0.0135975	3.61387e-16		AT4G37070	-0.0506145	1.83213e-12		AT1G54970	-0.0166931	1.05788e-11		AT2G40330	-0.0294033	6.86854e-27
AT4G34260	0.0240377	1.17015e-25		AT5G59220	0.0275148	4.07805e-16		AT2G18800	-0.0467539	2.27491e-12		AT5G48010	-0.00730103	1.05788e-11		AT1G24420	-0.0201086	1.71059e-26
AT1G49030	-0.0806623	1.44273e-25		AT1G24420	-0.0319114	4.8508e-16		AT5G59540	-0.0517409	2.54261e-12		AT5G36130	-0.0104093	1.16867e-11		AT1G79520	0.0091949	1.71059e-26
AT3G17790	0.0529102	9.74779e-25		AT3G02480	0.0825256	5.19428e-16		AT4G39770	-0.0835947	4.08834e-12		AT3G30210	0.0174277	1.2106e-11		AT4G05180	0.0129011	3.20787e-26
AT1G70890	0.0493461	1.12695e-24		AT1G13710	-0.0450489	5.89663e-16		AT4G12480	0.0906303	4.86521e-12		AT5G60660	-0.0107398	1.46877e-11		AT4G39770	-0.017797	3.90535e-26
AT5G28520	0.100501	1.30471e-24		AT5G16970	0.0305857	8.04272e-16		AT4G04990	-0.0772721	5.34787e-12		AT2G46830	0.0076949	2.0221e-11		AT5G59680	-0.0166952	3.93192e-26
AT5G66170	0.0432496	5.62996e-24		AT5G48180	0.0191275	9.64144e-16		AT4G30490	-0.0347902	7.60254e-12		AT5G67400	-0.00967635	2.03854e-11		AT3G51510	0.0138345	8.46036e-26
AT5G04120	0.111533	7.7246e-24		AT3G02020	-0.0329948	1.32248e-15		AT3G16470	-0.0415657	8.25519e-12		AT5G63850	-0.00886733	2.286e-11		AT1G29930	0.0118721	1.99115e-25
AT4G08770	-0.0554075	1.1678e-23		AT4G17030	0.0242396	1.38226e-15		AT1G24320	-0.0548836	9.06171e-12		AT3G54500	0.0063917	2.79206e-11		AT5G06270	0.0100808	1.99115e-25
AT4G23700	0.0522761	1.88654e-23		AT1G20160	0.021489	1.62567e-15		AT3G57520	-0.0345791	1.19091e-11		AT5G49630	-0.00686745	2.85525e-11		AT2G30570	0.0115953	2.81255e-25
AT3G49580	0.072464	2.64281e-23		AT3G23730	-0.0383758	3.00655e-15		AT2G30250	-0.0338632	1.34933e-11		AT4G39770	-0.00920116	3.0628e-11		AT4G01050	0.00797875	2.82373e-25
AT1G01580	-0.0426647	2.81899e-23		AT2G46830	0.0197348	3.266e-15		AT3G15030	0.0342384	1.50731e-11		AT2G18050	0.00849514	3.07931e-11		AT2G31083	0.0155873	3.60514e-25
AT4G15230	0.0406636	5.64685e-23		AT5G23010	-0.0290069	3.266e-15		AT4G24350	-0.0920008	1.76788e-11		AT4G37700	-0.0095856	3.40234e-11		AT4G12480	0.0481279	9.35139e-25
AT5G26260	0.0447543	9.22064e-23		AT2G38940	0.0259274	4.01989e-15		AT5G58670	-0.0391209	1.83326e-11		AT5G24140	-0.00876426	3.40234e-11		AT3G61470	0.0124829	1.31324e-24
AT2G37870	0.0986441	9.41558e-23		AT4G39770	-0.0339188	4.01989e-15		AT1G05200	-0.0452947	2.14559e-11		AT3G49960	-0.0115332	5.17698e-11		AT2G29460	0.0111035	1.581e-24
AT5G42580	0.0793438	9.41558e-23		AT5G43330	0.0195139	5.7189e-15		AT2G25450	-0.0294362	3.318e-11		AT1G02850	0.00527889	6.57236e-11		AT3G16560	0.00885441	4.2838e-24
AT2G29440	0.0322547	1.65723e-22		AT1G62290	0.0594587	5.95988e-15		AT3G14990	-0.0353768	3.38198e-11		AT4G27410	0.00687918	7.38445e-11		AT2G22122	0.0155147	4.29713e-24
AT1G49860	-0.0674087	2.03412e-22		AT3G20300	0.0344687	6.09181e-15		AT4G30270	-0.0746044	3.80445e-11		AT4G19390	0.00941863	7.59217e-11		AT4G35300	0.00551755	1.14068e-23
AT1G04107	-0.111737	3.36806e-22		AT2G21650	-0.0782496	6.17995e-15		AT2G48020	-0.033572	3.85231e-11		AT5G57050	0.0047116	8.69124e-11		AT5G66570	0.00900057	1.29839e-23
AT5G50140	-0.0872528	3.76096e-22		AT2G41800	0.0145134	1.61963e-14		AT1G51340	-0.0459361	7.40726e-11		AT5G65800	-0.0143373	1.2861e-10		AT3G54820	0.00971394	2.97375e-23
AT3G29110	-0.0757127	3.93422e-22		AT1G60470	0.0317005	1.88028e-14		AT3G19710	-0.0631369	7.54813e-11		AT1G51270	0.00523887	1.44564e-10		AT5G16970	0.00932607	3.17176e-23
AT3G27220	-0.0648014	1.12462e-21		AT3G51860	0.0256951	2.43273e-14		AT5G03553	0.0370964	7.54813e-11		AT1G72770	0.00441769	1.5889e-10		AT4G02380	0.0120797	3.92853e-23
AT1G62570	0.0434156	2.36493e-21		AT5G10380	-0.0844849	3.40153e-14		AT5G38710	-0.0685016	1.02244e-10		AT1G73280	-0.00612224	1.68096e-10		AT5G26920	-0.0211854	7.88238e-23
AT1G64590	0.0607179	4.39167e-21		AT3G44300	0.0248545	3.77793e-14		AT5G48720	0.0434732	1.12582e-10		AT4G37970	0.0068271	2.31949e-10		AT1G68740	0.0133587	8.77218e-23
AT2G41190	0.0540136	1.61485e-20		AT2G30140	0.0174455	4.09914e-14		AT1G77530	-0.0865352	1.56474e-10		AT2G44480	0.00799548	3.31696e-10		AT1G73040	0.0187799	9.81162e-23
AT3G27950	-0.076068	1.64132e-20		AT1G54575	0.0216204	8.40801e-14		AT4G08300	-0.201352	2.29599e-10		AT5G47640	0.00603735	3.45363e-10		AT5G06720	0.0135822	1.04143e-22
AT3G27250	0.082027	2.09241e-20		AT4G00780	-0.032797	8.40801e-14		AT4G08290	-0.104395	2.85755e-10		AT2G18150	0.00534044	3.76182e-10		AT5G43780	0.00672663	1.19656e-22
AT3G60270	-0.0915295	3.86128e-20		AT1G23730	0.0546106	9.72016e-14		AT1G19900	-0.0782025	2.93913e-10		AT3G16800	0.00583151	4.26194e-10		AT1G67740	0.0114547	1.7868e-22
AT3G03670	-0.0803897	5.64361e-20		AT5G42600	0.0416188	1.2359e-13		AT3G50740	-0.0342457	3.25852e-10		AT3G62680	-0.0115239	6.09748e-10		AT1G01470	0.0104561	1.97845e-22
AT5G03210	0.0734944	5.64361e-20		AT5G38000	0.0162864	1.78656e-13		AT1G32870	0.0403701	3.56384e-10		AT5G22410	-0.0112658	1.26972e-09		AT1G16370	-0.0157252	3.24289e-22
AT1G12805	-0.140666	7.44315e-20		AT2G30550	0.0208286	1.78762e-13		AT2G18600	0.0574	4.11321e-10		AT2G37900	0.0132509	1.31959e-09		AT3G47470	0.00843149	3.61073e-22
AT3G13610	-0.031404	1.03254e-19		AT5G14200	-0.0226168	1.78762e-13		AT5G24140	-0.0694444	4.92029e-10		AT4G11350	0.00571106	1.31959e-09		AT1G60740	0.0147336	4.37636e-22
AT4G21400	-0.0464255	1.10784e-19		AT1G16400	-0.0260002	1.79959e-13		AT1G65310	-0.0495061	5.06211e-10		AT4G34580	-0.00764905	1.55767e-09		AT3G23400	0.0063535	7.57224e-22
AT1G54950	-0.115049	1.67335e-19		AT5G43780	-0.0123987	2.532e-13		AT3G10300	0.0348861	5.7028e-10		AT5G17450	-0.00842435	1.67961e-09		AT3G12780	0.00561904	7.91488e-22
AT3G43190	-0.0952503	2.02369e-19		AT3G19710	-0.0345991	2.72904e-13		AT5G23020	-0.0489302	5.7028e-10		AT5G06980	0.00521131	1.99551e-09		AT4G18810	0.0124069	1.22392e-21
AT1G18870	0.0511264	2.6084e-19		AT3G53980	0.0255553	2.83712e-13		AT4G36220	-0.0360919	6.32698e-10		AT5G54980	0.00629209	2.16024e-09		AT1G59960	0.00541355	1.84122e-21
AT5G48430	-0.0534282	4.06581e-19		AT4G37970	0.0303079	2.85238e-13		AT5G07780	-0.0749341	7.89785e-10		AT1G16850	0.0107446	2.36134e-09		AT4G21680	0.0253853	1.93718e-21
AT1G11540	-0.0596179	4.27874e-19		AT1G66970	-0.0492709	4.07193e-13		AT4G10770	-0.0375391	8.40595e-10		AT5G64810	0.00748245	2.38173e-09		AT1G71880	-0.0097248	2.15363e-21
AT5G66985	-0.0535508	4.75417e-19		AT1G02850	0.0208844	4.42601e-13		AT3G50640	0.0334824	8.53652e-10		AT4G18550	-0.00641235	2.5596e-09		AT5G07680	0.00910378	2.69726e-21
AT1G14960	0.051582	5.23151e-19		AT3G22550	0.0205312	4.7948e-13		AT1G18830	0.185227	9.28949e-10		AT3G08040	0.00522813	3.12656e-09		AT2G15970	0.0082623	3.1497e-21
AT3G61890	0.0538693	6.07573e-19		AT5G01820	0.0129755	5.83527e-13		AT4G21590	0.0559067	9.28949e-10		AT5G20150	0.00829269	3.51373e-09		AT5G67430	0.00805531	3.25699e-21
AT1G13440	-0.0232094	6.32181e-19		AT1G69880	0.0292504	6.99952e-13		AT5G63930	-0.0206104	1.05771e-09		AT1G69410	0.00328284	3.54237e-09		AT4G02770	0.0112932	3.5969e-21
AT2G39530	-0.0485402	7.02701e-19		AT1G49750	-0.0409625	9.17426e-13		AT3G01600	0.0955354	1.15747e-09		AT4G22080	-0.0143021	3.92642e-09		AT4G14780	0.0130194	4.60889e-21
AT3G19710	-0.0316413	7.77911e-19		AT4G18280	0.0366464	1.16835e-12		AT5G18860	-0.0419735	1.22794e-09		AT3G21340	-0.00818622	3.93507e-09		AT1G31330	0.0102132	9.31155e-21
AT4G14980	-0.0573167	9.64354e-19		AT5G52790	-0.0392593	1.6485e-12		AT1G70690	-0.0372299	1.23302e-09		AT3G29430	-0.00939786	4.03987e-09		AT2G26500	0.0121201	1.53312e-20
AT2G46680	0.0414931	1.47067e-18		AT3G48690	0.0221841	1.72877e-12		AT3G12240	-0.090165	1.23302e-09		AT1G19900	-0.0121339	4.61502e-09		AT3G51750	0.0135003	1.96606e-20
AT3G06435	-0.120194	1.62771e-18		AT3G15020	0.0102682	1.77569e-12		AT3G51360	-0.0636533	1.23302e-09		AT1G01453	-0.0162883	5.00847e-09		AT3G54890	0.0089293	1.9678e-20
AT2G26820	-0.0652928	1.80209e-18		AT1G52700	0.048919	2.14949e-12		AT1G12090	-0.0364364	1.24629e-09		AT2G25150	-0.011263	5.2937e-09		AT5G61410	0.00690291	2.55272e-20
AT4G29930	0.043438	2.23213e-18		AT2G19900	0.0458587	2.60555e-12		AT1G78830	-0.0588309	1.33992e-09		AT2G46680	0.00513473	5.2937e-09		AT5G59220	0.00933159	2.62918e-20
AT2G01520	0.0420809	2.64237e-18		AT1G15310	0.0143366	2.85059e-12		AT4G28410	-0.0496164	1.39667e-09		AT5G47980	-0.0130992	5.58373e-09		AT1G03870	-0.00795126	2.98992e-20
AT2G43140	-0.08502	2.70596e-18		AT1G78020	-0.0269541	3.15562e-12		AT5G38910	-0.0814398	1.78066e-09		AT1G15380	0.00449932	5.65153e-09		AT5G36220	0.0174681	3.73259e-20
AT3G46700	0.0451822	3.511e-18		AT4G34710	0.0149825	3.77132e-12		AT1G73330	-0.052426	1.90509e-09		AT5G57530	-0.0191859	6.04525e-09		AT2G27402	-0.0239176	4.10871e-20
AT3G51860	0.0371208	3.69786e-18		AT3G06390	-0.0193854	4.45512e-12		AT4G11320	-0.0369044	2.26504e-09		AT5G57625	-0.0083773	6.62853e-09		AT3G23730	-0.0193989	6.20285e-20
AT4G21410	-0.0389004	3.75066e-18		AT3G58990	-0.0261264	4.70475e-12		AT1G24095	0.0537834	2.41763e-09		AT3G46130	0.00444556	9.15436e-09		AT5G01530	0.00967794	6.82849e-20
AT1G74090	-0.0234536	4.57959e-18		AT1G79520	0.0189206	5.63615e-12		AT4G28940	-0.0381751	2.96263e-09		AT3G53160	0.0087283	9.35122e-09		AT5G64120	-0.00621132	7.87115e-20
AT1G33900	-0.113005	7.38035e-18		AT3G14620	0.021336	6.62685e-12		AT1G59590	-0.0406612	3.11201e-09		AT1G47960	0.00735059	1.57842e-08		AT5G19440	0.00501582	8.88979e-20
AT5G13420	-0.0219177	7.38035e-18		AT3G17790	0.0199369	7.147e-12		AT1G21120	0.0705546	3.26215e-09		AT2G39040	-0.00992702	1.75456e-08		AT3G45700	-0.0144022	1.06384e-19
AT1G66800	0.0568308	7.80308e-18		AT4G30270	-0.0228053	7.47559e-12		AT4G19720	-0.0575705	3.4965e-09		AT1G22430	0.00573193	1.7703e-08		AT4G02920	0.00677192	1.52114e-19
AT2G25150	0.0598923	9.60784e-18		AT1G01340	-0.0203563	8.44355e-12		AT5G59320	0.0679527	3.4965e-09		AT1G73920	0.00344405	1.84807e-08		AT3G02480	0.0256481	1.77461e-19
AT3G02550	-0.0680718	1.16849e-17		AT2G39800	0.0239112	1.02884e-11		AT1G57590	-0.0532999	4.00672e-09		AT5G43230	-0.0137903	2.27445e-08		AT1G01070	0.0108777	2.08488e-19
AT1G50090	-0.0846278	1.18246e-17		AT1G13670	-0.0251526	1.26875e-11		AT4G23680	-0.112774	4.57082e-09		AT4G19230	0.00699952	2.62809e-08		AT4G21210	0.0106188	2.08488e-19
AT2G30490	-0.0233825	1.47508e-17		AT1G77120	0.0217523	1.32443e-11		AT5G64330	-0.0320527	6.65893e-09		AT4G39350	-0.00325729	2.81004e-08		AT5G38910	-0.0200739	3.70025e-19
AT1G56600	0.0626948	1.80822e-17		AT2G27402	-0.0514446	1.8399e-11		AT5G48620	-0.0426414	6.92441e-09		AT4G24960	0.00781046	3.02409e-08		AT5G46110	0.0105404	3.70025e-19
AT3G14440	0.0659296	2.11813e-17		AT1G55360	-0.0100476	1.8518e-11		AT5G24780	-0.059083	7.34711e-09		AT1G24420	-0.00834366	3.07148e-08		AT5G40800	0.0151493	3.96753e-19
AT4G05020	0.0279293	2.21183e-17		AT5G05890	-0.0155906	1.88744e-11		AT1G55360	-0.0216206	7.40721e-09		AT3G14230	0.00296995	3.11935e-08		AT2G36460	0.00510336	6.15704e-19
AT5G59680	-0.0476107	2.50251e-17		AT1G56120	-0.0297162	1.95282e-11		AT5G10770	-0.0348063	7.40721e-09		AT3G32030	-0.00727033	3.86026e-08		AT3G04320	0.0150578	7.32556e-19
AT1G77760	-0.0625781	2.51323e-17		AT4G12030	-0.0303501	2.46752e-11		AT5G07650	-0.100036	8.09533e-09		AT2G27402	-0.00722823	3.89522e-08		AT5G61420	-0.0108685	7.79657e-19
AT1G11580	-0.0368833	3.38613e-17		AT2G16005	0.027752	3.55605e-11		AT4G31110	-0.0401857	9.1305e-09		AT1G15540	-0.00572761	4.27802e-08		AT1G07430	0.0184295	9.02772e-19
AT4G23420	0.0339015	3.59558e-17		AT5G03995	-0.0383521	3.70247e-11		AT4G33330	-0.0331536	1.09604e-08		AT4G22214	-0.00585108	4.48337e-08		AT3G02020	-0.00848264	9.19549e-19
AT1G54890	-0.033785	4.8941e-17		AT1G26450	0.0165692	4.8242e-11		AT2G43820	-0.0361317	1.10168e-08		AT4G32260	0.00375822	4.83472e-08		AT2G42790	0.00587267	9.48248e-19
AT3G53980	0.0560098	5.37011e-17		AT3G27820	0.0103281	4.91274e-11		AT5G49900	-0.0306136	1.18404e-08		AT5G07570	-0.0152564	4.83472e-08		AT1G02520	-0.00710765	1.00545e-18
AT2G19590	-0.0815131	5.94842e-17		AT4G04955	-0.0138352	5.38116e-11		AT1G01190	-0.0664819	1.27539e-08		AT5G63450	-0.00584204	4.83472e-08		AT1G13440	0.00442804	1.01369e-18
AT1G55810	-0.0387513	6.02862e-17		AT1G01470	0.0243619	5.61622e-11		AT4G22380	0.0334802	1.30014e-08		AT3G21260	0.00495222	5.3621e-08		AT1G53130	0.0234095	1.38509e-18
AT5G42600	0.129474	6.21264e-17		AT5G11110	0.0238999	5.95563e-11		AT4G35160	-0.037846	1.33031e-08		AT5G19875	0.00677443	7.35169e-08		AT5G37500	0.00770085	1.58337e-18
AT5G40590	-0.0447803	8.66946e-17		AT5G02230	0.0112666	6.49786e-11		AT1G49570	0.128992	1.51388e-08		AT5G64100	-0.00707872	7.43431e-08		AT3G44300	0.00986957	1.65594e-18
AT3G01190	-0.0472658	8.9912e-17		AT3G25620	0.0432739	6.8745e-11		AT5G21950	-0.0344597	1.68982e-08		AT1G59940	-0.00732802	7.53347e-08		AT3G48990	0.00840135	1.7941e-18
AT1G44050	-0.0635727	9.96111e-17		AT1G14520	0.0430745	8.32407e-11		AT5G41670	0.0341361	1.68982e-08		AT2G23910	0.011453	7.68744e-08		AT1G27140	-0.0132249	1.8056e-18
AT2G02990	0.0641678	1.00824e-16		AT3G54600	-0.0193064	8.70461e-11		AT1G35330	-0.0573124	1.70788e-08		AT1G52790	-0.00664283	7.75687e-08		AT3G53980	0.0111579	1.8056e-18
AT5G65990	0.0650912	1.13225e-16		AT4G36430	0.0162602	1.41723e-10		AT5G64240	-0.0329829	1.70788e-08		AT1G52800	-0.00588079	8.50569e-08		AT3G22400	-0.00785995	2.05404e-18
AT3G29575	0.0340697	1.2448e-16		AT4G15990	-0.0387815	1.66927e-10		AT4G38470	-0.0631397	1.75576e-08		AT1G11260	-0.0047487	8.66507e-08		AT2G28960	-0.0114484	2.1695e-18
AT1G29020	-0.0465152	1.97319e-16		AT1G73290	-0.028129	1.77972e-10		AT5G35580	-0.0406887	1.75576e-08		AT1G14185	-0.00873581	8.66507e-08		AT1G67090	0.0106088	2.64489e-18
AT3G29250	0.0416118	2.04785e-16		AT3G12750	0.0235528	1.90783e-10		AT4G12330	-0.0703679	1.81387e-08		AT4G31730	0.00588679	8.69009e-08		AT5G67480	0.00721856	3.05187e-18
AT3G19130	-0.0229081	2.4281e-16		AT4G23980	-0.0155119	2.02888e-10		AT3G14690	-0.0223258	1.86266e-08		AT2G24980	-0.0152298	9.02977e-08		AT2G18370	0.00923874	4.80635e-18
AT4G24110	-0.107336	2.4281e-16		AT1G07550	-0.0401773	2.13736e-10		AT4G13390	-0.0502359	1.87116e-08		AT1G21680	0.0042916	9.11743e-08		AT1G67870	-0.007561	5.65605e-18
AT4G33720	-0.0621269	2.70706e-16		AT1G02220	0.0155251	2.30482e-10		AT5G12270	-0.0959665	1.90655e-08		AT4G19030	-0.00746967	9.83182e-08		AT2G28690	0.0116945	6.43441e-18
AT4G25310	-0.0563857	2.73537e-16		AT1G35710	-0.0191239	3.02038e-10		AT1G51460	0.0901099	2.17927e-08		AT4G20240	-0.00829554	1.04389e-07		AT3G13610	-0.0144137	7.00017e-18
AT1G75280	0.028628	2.77188e-16		AT4G19230	0.0222969	3.05947e-10		AT2G30520	-0.0308174	2.17927e-08		AT4G28150	0.007698	1.13512e-07		AT4G14020	0.0111543	8.24054e-18
AT5G47980	0.0541185	2.98548e-16		AT1G78440	-0.0389614	3.50144e-10		AT2G43050	-0.0707669	2.17927e-08		AT1G69260	0.00552724	1.14391e-07		AT4G39675	0.0151161	8.24253e-18
AT1G28130	0.0215363	3.07395e-16		AT4G13420	-0.0311868	4.16815e-10		AT4G20230	-0.0502431	2.17927e-08		AT1G07430	0.0118973	1.16929e-07		AT1G31050	-0.00635118	9.2609e-18
AT4G08380	-0.121317	3.07395e-16		AT2G43910	-0.014771	4.2503e-10		AT2G35980	-0.0504081	2.23931e-08		AT1G65310	-0.00767284	1.16987e-07		AT5G51780	-0.00816942	1.0795e-17
AT1G49450	0.0351588	3.6994e-16		AT5G23220	0.0175932	4.41265e-10		AT3G46280	-0.0340957	2.24584e-08		AT1G62980	-0.00664375	1.37654e-07		AT2G38380	0.00723706	1.09859e-17
AT5G51780	0.0325238	4.38444e-16		AT3G52060	-0.0161365	5.63953e-10		AT2G21640	0.088732	2.38085e-08		AT4G15780	0.00509701	1.43419e-07		AT3G12900	-0.0197311	1.12072e-17
AT3G18450	-0.0953079	4.98072e-16		AT5G17380	0.0100898	5.63953e-10		AT2G43110	0.0299352	2.40651e-08		AT1G49310	0.00667394	1.51229e-07		AT1G52400	0.0140429	1.24546e-17
AT2G46495	-0.0658301	5.99862e-16		AT5G25280	-0.0136232	5.63953e-10		AT4G04020	0.0425645	2.46013e-08		AT1G69880	0.00932284	1.52311e-07		AT2G20260	0.0108866	2.14029e-17
AT1G74590	0.0330032	8.78685e-16		AT5G56320	0.0132107	5.65096e-10		AT1G78440	-0.0643054	2.47034e-08		AT1G68740	0.00688667	1.55699e-07		AT1G48260	-0.0140101	2.15294e-17
AT1G71710	0.032572	1.60134e-15		AT2G38640	0.0190818	6.11458e-10		AT5G23010	-0.0520822	2.53731e-08		AT4G02280	0.00440808	1.59736e-07		AT2G43610	0.00765686	2.33272e-17
AT3G50460	-0.0944709	2.42767e-15		AT4G14020	0.0250154	7.13808e-10		AT1G15625	-0.117798	2.55908e-08		AT1G01070	0.00595034	1.67337e-07		AT5G49770	-0.01904	2.33272e-17
AT3G01420	0.0310164	2.64416e-15		AT4G02280	0.032275	7.28272e-10		AT5G62330	-0.113106	2.76517e-08		AT1G68010	0.0129189	1.76391e-07		AT5G19940	0.00769818	3.28181e-17
AT3G11410	0.0356613	2.95491e-15		AT3G62730	0.0247435	7.35177e-10		AT2G31083	-0.122468	3.03863e-08		AT4G34680	0.00380482	1.86729e-07		AT5G47650	0.00775226	4.59513e-17
AT5G19890	-0.0546245	2.95491e-15		AT3G48510	0.0295911	7.63942e-10		AT1G11260	-0.0357324	3.119e-08		AT5G03995	-0.00725903	2.14351e-07		AT1G74010	0.00915643	5.18184e-17
AT5G15190	0.0621894	2.96235e-15		AT2G30770	0.0467799	7.84013e-10		AT5G12280	-0.0673261	3.119e-08		AT5G57345	0.0096167	2.16792e-07		AT1G20340	0.0107641	5.78215e-17
AT1G19530	-0.0787826	3.28034e-15		AT2G28960	-0.017546	8.27133e-10		AT5G62420	-0.0535809	3.14768e-08		AT5G56870	-0.0070164	2.468e-07		AT1G09932	0.0137985	7.01508e-17
AT2G44080	-0.0762524	3.44133e-15		AT3G61490	0.0219217	8.75569e-10		AT4G34138	-0.0783912	3.15125e-08		AT2G20520	-0.0290002	3.33067e-07		AT3G18830	0.00790742	7.37944e-17
AT1G23800	0.0231314	3.75679e-15		AT5G59480	0.0127899	9.10549e-10		AT1G30820	-0.0320949	3.30046e-08		AT5G24800	0.00594002	3.33067e-07		AT3G26610	-0.0137852	7.49308e-17
AT1G60110	-0.0781453	4.90089e-15		AT1G21270	-0.0677472	9.28593e-10		AT4G07820	-0.0704181	3.30046e-08		AT5G12950	-0.00399139	3.61274e-07		AT1G31170	0.00866892	9.95423e-17
AT2G39210	0.0260343	5.69743e-15		AT3G11930	0.0137852	1.07167e-09		AT4G16270	0.0389106	3.42921e-08		AT1G72140	-0.00581629	5.04184e-07		AT1G13590	0.0126617	1.0595e-16
AT4G32940	0.0206703	6.07603e-15		AT1G75600	0.0378479	1.13215e-09		AT5G07860	-0.0430304	3.61151e-08		AT5G03640	-0.0089862	5.38675e-07		AT2G14210	0.020244	1.58928e-16
AT4G17260	-0.0385706	8.50682e-15		AT5G19440	0.0129111	1.13215e-09		AT2G24580	-0.0569775	3.70748e-08		AT3G26080	0.00644084	5.49818e-07		AT1G60710	0.00703364	2.27939e-16
AT1G72360	-0.0691117	1.01067e-14		AT4G15340	-0.0231036	1.14924e-09		AT1G30720	-0.0567164	3.72668e-08		AT4G37370	0.00688213	5.92252e-07		AT3G23090	-0.00589686	2.3781e-16
AT2G40330	-0.0876431	1.11001e-14		AT5G06760	0.0640435	1.18242e-09		AT3G17510	-0.0466482	4.0945e-08		AT2G35585	0.00459098	5.965e-07		AT4G38410	0.0157465	2.74964e-16
AT4G24960	0.0314252	1.1584e-14		AT4G39955	0.0142077	1.19642e-09		AT4G06744	-0.0261972	4.79408e-08		AT5G35190	-0.013721	6.28954e-07		AT1G05700	-0.0101901	2.75029e-16
AT3G16400	0.0313517	1.25249e-14		AT3G27250	0.0306339	1.2203e-09		AT2G22330	-0.0452776	4.96387e-08		AT4G11210	-0.00678733	6.79249e-07		AT2G04090	0.0112734	3.19249e-16
AT1G73220	0.0566919	1.345e-14		AT4G37370	0.0171253	1.22889e-09		AT4G30460	-0.0291264	5.62692e-08		AT5G08640	0.0101167	6.91703e-07		AT4G27710	0.00872746	3.27433e-16
AT1G15460	0.0501197	1.69782e-14		AT5G28520	0.0489282	1.6612e-09		AT2G25000	0.0434045	5.63522e-08		AT5G36140	-0.0166261	6.94258e-07		AT1G69480	0.00969716	3.55344e-16
AT5G20830	-0.053977	1.85508e-14		AT5G47650	0.0126538	1.72846e-09		AT4G14020	0.0412192	5.63522e-08		AT3G47510	0.00830128	7.00289e-07		AT1G23760	-0.0115565	4.90968e-16
AT4G23680	0.0392507	1.9281e-14		AT5G23020	-0.0190373	1.91203e-09		AT1G77840	0.0177906	5.78738e-08		AT1G17830	0.00609372	7.09588e-07		AT4G04990	-0.0122083	5.15163e-16
AT3G46280	-0.0352061	2.22949e-14		AT3G44310	0.015553	1.98315e-09		AT1G31050	-0.0236667	6.53699e-08		AT1G54890	0.0115988	7.77425e-07		AT4G12330	0.0127172	6.84847e-16
AT2G01530	0.0290411	2.51197e-14		AT3G03640	0.0109869	2.08873e-09		AT1G75540	-0.0245695	6.57106e-08		AT3G45700	-0.00901309	7.90767e-07		AT3G08040	0.0103111	7.00677e-16
AT2G27660	-0.0386122	3.69527e-14		AT1G26770	0.0224358	2.324e-09		AT4G33110	0.0688612	7.51803e-08		AT5G17460	0.00526979	7.92826e-07		AT1G23730	0.0194213	7.77907e-16
AT1G47840	-0.0289662	4.39312e-14		AT5G47240	-0.0250944	2.324e-09		AT3G01290	-0.0491099	7.64386e-08		AT1G17190	-0.00698348	9.5328e-07		AT3G05650	0.0084099	9.01522e-16
AT4G11210	0.0461609	4.54536e-14		AT3G43270	0.015551	2.43177e-09		AT4G23700	-0.0576156	8.16938e-08		AT3G11410	0.00462263	9.68439e-07		AT4G39955	0.00656776	9.08557e-16
AT5G02090	0.040665	4.59312e-14		AT4G25090	-0.0213555	2.66626e-09		AT4G14040	-0.0400499	8.19439e-08		AT3G56370	-0.00349725	1.06167e-06		AT4G23980	-0.00770758	9.16155e-16
AT1G17170	0.0433127	4.64873e-14		AT1G73010	0.0210383	3.22186e-09		AT1G55380	-0.0600945	8.44382e-08		AT4G01550	0.00397188	1.06167e-06		AT2G18150	0.0078966	9.65482e-16
AT1G66200	-0.0324041	4.64873e-14		AT3G60140	0.0377733	3.54575e-09		AT5G59680	-0.0484646	9.85404e-08		AT4G34600	0.00501747	1.07907e-06		AT5G52310	0.0139842	9.94905e-16
AT3G59710	0.0593333	6.19991e-14		AT5G15960	0.0490648	3.57278e-09		AT2G01520	-0.0647406	1.0329e-07		AT1G53780	0.00354968	1.08023e-06		AT5G57345	0.0141885	1.16193e-15
AT5G55050	0.0457569	8.90613e-14		AT2G29500	0.0140582	3.66383e-09		AT4G34920	-0.0259046	1.055e-07		AT4G25220	-0.0156268	1.09159e-06		AT1G13710	-0.0141647	1.25449e-15
AT5G52710	-0.0492763	8.94116e-14		AT2G35760	0.0169059	3.70417e-09		AT4G25630	0.0214894	1.20016e-07		AT3G45080	-0.00772979	1.11882e-06		AT5G07870	-0.00831087	1.28296e-15
AT5G37450	-0.0555287	9.57233e-14		AT4G04020	0.0130626	3.77092e-09		AT1G21100	-0.0615605	1.30788e-07		AT3G24310	0.0076433	1.1255e-06		AT1G72150	-0.00564777	1.33601e-15
AT3G16430	0.0266031	1.01378e-13		AT5G43850	0.0106107	3.77092e-09		AT3G57020	-0.0462174	1.30788e-07		AT4G28530	-0.0140816	1.14721e-06		AT3G26650	0.011031	1.38005e-15
AT5G52350	-0.097468	1.06304e-13		AT5G59680	-0.0387856	3.8315e-09		AT1G16150	-0.0913731	1.36335e-07		AT1G13420	-0.00791605	1.15854e-06		AT3G14060	0.0174865	1.40594e-15
AT5G61820	0.0344096	1.11732e-13		AT1G73805	-0.0409756	4.34257e-09		AT1G73260	-0.0500674	1.43462e-07		AT1G16440	-0.00764761	1.21548e-06		AT5G54760	0.00533526	1.42547e-15
AT3G02240	-0.0737061	1.1676e-13		AT4G24780	-0.0153529	4.50862e-09		AT3G62010	-0.0299577	1.43793e-07		AT4G25790	-0.0136254	1.2737e-06		AT4G16260	0.00806344	1.55696e-15
AT3G45070	0.0267152	1.28391e-13		AT5G13330	0.0181644	5.0135e-09		AT1G28260	-0.0284778	1.47633e-07		AT2G01430	0.00538343	1.55539e-06		AT2G29340	0.0139348	1.8041e-15
AT1G69260	0.0487621	1.28567e-13		AT3G01260	-0.0209627	5.73855e-09		AT3G04320	-0.080731	1.47633e-07		AT5G07990	0.0132228	1.75152e-06		AT4G00480	-0.01112	1.8786e-15
AT5G40850	-0.0268113	1.35564e-13		AT4G32460	0.0111465	5.82072e-09		AT1G23870	-0.0593511	1.48196e-07		AT3G20460	-0.00711963	1.79054e-06		AT3G26060	0.00932511	1.9434e-15
AT2G22930	0.0324722	1.41649e-13		AT4G33540	0.0121598	6.06489e-09		AT3G56400	-0.0789119	1.60605e-07		AT5G47990	-0.00939815	1.79054e-06		AT3G56940	0.00760348	1.96474e-15
AT1G76680	0.0467517	1.49492e-13		AT1G45249	0.00882532	6.54883e-09		AT4G04040	-0.0509178	1.61849e-07		AT5G36870	-0.013683	1.79574e-06		AT3G18780	-0.00312038	2.15138e-15
AT4G33550	0.05848	1.52574e-13		AT2G40330	-0.0454682	6.54883e-09		AT1G34420	-0.0344774	1.76182e-07		AT3G57540	0.00479941	1.85908e-06		AT4G39795	-0.00936474	2.16782e-15
AT5G40890	0.0218262	1.61784e-13		AT4G13430	-0.0112062	7.31271e-09		AT5G40890	-0.039692	1.81491e-07		AT5G57540	-0.0128902	1.95675e-06		AT1G75750	-0.00664787	2.2239e-15
AT5G15410	0.0363918	1.73715e-13		AT4G21580	0.00893213	7.95278e-09		AT3G26040	-0.0626216	1.81991e-07		AT1G20160	0.00452206	2.04149e-06		AT2G28970	-0.00978416	2.69718e-15
AT3G03270	-0.0671043	1.97558e-13		AT5G49770	-0.0290407	7.95563e-09		AT4G27585	0.0261488	1.81991e-07		AT4G01430	0.00760479	2.16954e-06		AT4G01430	0.0131137	3.73214e-15
AT3G44326	0.0372904	2.18606e-13		AT1G73280	-0.0175479	8.90293e-09		AT3G58990	-0.0312366	1.86008e-07		AT4G15230	-0.00576039	2.16954e-06		AT2G19310	0.00960267	3.97943e-15
AT5G19550	-0.0444357	2.19144e-13		AT1G51140	0.012543	9.05751e-09		AT1G11580	-0.023506	1.90098e-07		AT3G52340	0.00401842	2.18071e-06		AT5G55110	0.0103897	4.54311e-15
AT4G21120	0.0599289	2.34589e-13		AT1G16850	0.0351546	9.25105e-09		AT1G16130	-0.0636568	1.90509e-07		AT4G16970	-0.00632443	2.48051e-06		AT2G06520	0.0104485	4.58166e-15
AT5G24090	0.0442598	2.41534e-13		AT1G72130	-0.00964243	1.0236e-08		AT1G17300	-0.0822416	1.91089e-07		AT1G80160	0.0109727	2.49342e-06		AT1G70720	0.0256609	4.65209e-15
AT1G37130	-0.0503598	2.45937e-13		AT2G42790	0.0107235	1.05372e-08		AT1G14860	-0.0400542	1.95402e-07		AT2G35150	-0.00490726	2.63045e-06		AT5G54770	0.00761767	4.91094e-15
AT5G45340	-0.0353961	2.81305e-13		AT1G60710	0.0099084	1.15268e-08		AT1G01070	-0.0494223	1.95893e-07		AT4G08620	-0.0156241	2.63045e-06		AT1G23310	0.0060793	4.93277e-15
AT2G12400	0.0215769	3.27114e-13		AT2G29660	-0.0127995	1.30312e-08		AT4G32250	0.0213902	1.99274e-07		AT3G05640	0.00479288	2.73756e-06		AT5G25140	0.0127213	4.93277e-15
AT5G49770	-0.0606684	3.54019e-13		AT5G27920	-0.0093313	1.70441e-08		AT4G15400	-0.0463049	2.00785e-07		AT1G10480	0.00673722	2.83115e-06		AT2G35260	0.00868598	5.09689e-15
AT2G47520	-0.113674	3.72551e-13		AT4G22240	0.009607	1.76768e-08		AT3G26570	-0.0452523	2.10253e-07		AT1G60470	0.00632182	2.83115e-06		AT5G41080	-0.0109046	6.19899e-15
AT3G15950	0.0177441	4.42311e-13		AT5G54230	-0.0184767	2.32056e-08		AT1G72830	0.0276712	2.1256e-07		AT1G62540	0.00410279	2.83115e-06		AT4G05390	0.0053476	9.2205e-15
AT4G10265	-0.119379	5.20546e-13		AT3G26830	0.0274222	2.4719e-08		AT2G28100	-0.0420462	2.1256e-07		AT5G48480	0.00481331	3.11974e-06		AT1G08380	0.0114981	9.31899e-15
AT2G31390	-0.0241999	5.24304e-13		AT3G51490	0.0266996	2.98595e-08		AT4G38830	-0.0714735	2.14533e-07		AT5G48850	-0.00874264	3.12904e-06		AT4G04640	0.00664241	1.07112e-14
AT4G19980	-0.0702341	5.3192e-13		AT4G14365	-0.0270242	2.98595e-08		AT3G03470	-0.0461479	2.14622e-07		AT1G08650	0.00535755	3.23732e-06		AT5G13180	0.00464938	1.11423e-14
AT4G13430	-0.0163636	5.74325e-13		AT4G21650	0.0463064	3.27467e-08		AT3G16400	-0.0289982	2.36085e-07		AT5G64850	0.00505978	3.35122e-06		AT4G02860	0.00430092	1.13854e-14
AT5G23750	0.0282889	5.98171e-13		AT1G58360	0.0177356	3.49141e-08		AT4G00780	-0.0664045	2.39625e-07		AT3G47220	-0.00593353	3.36295e-06		AT3G16240	-0.00839033	1.14914e-14
AT5G45080	-0.0376406	6.30603e-13		AT3G15650	0.0164219	3.71424e-08		AT1G72300	-0.0243326	2.42444e-07		AT4G01830	-0.0149987	3.36295e-06		AT5G63850	-0.0169494	1.14914e-14
AT2G39050	0.0426253	6.94127e-13		AT1G19900	-0.0253076	3.84546e-08		AT3G48740	-0.138183	2.42444e-07		AT2G16660	-0.00853211	3.39011e-06		AT4G11880	-0.00962921	1.30661e-14
AT5G26130	-0.103391	7.03245e-13		AT1G47960	0.0159622	4.24719e-08		AT1G70250	0.0396947	2.56669e-07		AT1G10682	0.00467144	3.46679e-06		AT1G69295	0.00638412	1.40655e-14
AT2G23540	0.0191879	7.36245e-13		AT1G17020	0.0147032	5.44522e-08		AT2G39010	-0.0473436	2.72951e-07		AT5G11570	-0.00489198	4.32853e-06		AT1G69230	0.011363	1.60112e-14
AT4G27450	-0.0824702	7.62527e-13		AT4G39210	0.0243234	5.44522e-08		AT4G25000	-0.0938579	2.91749e-07		AT2G41870	0.00731286	4.35658e-06		AT1G52700	0.0235594	1.60282e-14
AT4G15610	0.0353893	8.54881e-13		AT3G24170	0.0119	5.80427e-08		AT5G01870	0.0562885	2.91749e-07		AT1G79320	-0.00988092	4.4871e-06		AT1G26770	0.0117153	1.62792e-14
AT5G22410	0.0416248	8.54881e-13		AT2G35840	0.0118779	5.86788e-08		AT5G41410	-0.0423887	3.08863e-07		AT3G28360	0.0154278	4.58478e-06		AT5G62340	-0.00845007	1.71161e-14
AT5G36150	0.0812386	8.79951e-13		AT3G12900	-0.0311118	6.12902e-08		AT1G63180	-0.0731693	3.2777e-07		AT1G07010	0.00558627	4.68005e-06		AT1G42970	0.0143233	1.84335e-14
AT5G48180	0.0342509	1.08018e-12		AT1G25530	0.0215375	6.33807e-08		AT1G69160	-0.0421387	3.2777e-07		AT4G29920	-0.0044966	4.80345e-06		AT5G07860	-0.00658655	2.01329e-14
AT1G78340	0.0390217	1.27198e-12		AT1G52400	0.0421256	6.34749e-08		AT5G36870	-0.0882937	3.49471e-07		AT5G07680	0.00621412	5.07646e-06		AT5G66190	0.00999363	2.27741e-14
AT3G27884	0.0382124	1.29367e-12		AT5G64260	-0.0172557	6.37934e-08		AT5G03740	0.0247361	3.56312e-07		AT4G33730	-0.0112867	5.15868e-06		AT5G28520	0.0178121	2.58241e-14
AT5G26200	-0.0812812	1.42304e-12		AT2G37240	0.0193479	6.91651e-08		AT5G42600	-0.130491	3.62299e-07		AT2G38870	0.00835325	5.23602e-06		AT5G43330	0.00802087	2.61601e-14
AT3G44310	0.0276845	1.42711e-12		AT3G51000	0.0120661	6.91651e-08		AT1G48580	0.0443045	4.02134e-07		AT4G19680	-0.0101145	5.47183e-06		AT1G58360	0.00807171	2.63865e-14
AT5G54040	-0.0431304	1.4341e-12		AT4G26270	0.0141666	7.12726e-08		AT1G51860	-0.0360655	4.50812e-07		AT5G51270	-0.00914646	5.73357e-06		AT4G11600	0.00534843	3.06407e-14
AT1G52690	0.0658954	1.44583e-12		AT5G24280	0.0206	7.25773e-08		AT2G34350	-0.0735943	4.54965e-07		AT4G08400	-0.0127832	5.98594e-06		AT4G20240	-0.0122921	3.49702e-14
AT3G54040	-0.0396727	1.58857e-12		AT2G13360	-0.0111902	7.51439e-08		AT5G65170	-0.0393488	4.74366e-07		AT3G26330	-0.0053789	6.21194e-06		AT1G67105	0.0230492	4.03621e-14
AT3G47420	0.0202339	1.6575e-12		AT5G54390	0.0111873	7.76097e-08		AT3G09020	-0.0417811	5.07814e-07		AT5G36180	-0.00551458	6.25593e-06		AT5G36180	-0.00827989	4.2137e-14
AT5G23020	-0.0213082	1.8154e-12		AT3G44290	0.0286356	8.06216e-08		AT5G23810	0.0551355	5.31305e-07		AT1G09467	0.0123988	6.30042e-06		AT1G48420	0.00447165	4.90801e-14
AT5G54960	-0.0456745	2.00354e-12		AT3G47510	0.0194456	9.37638e-08		AT5G39090	-0.0527165	5.67649e-07		AT2G39410	0.00472053	6.30042e-06		AT4G25300	0.00948633	4.96647e-14
AT3G20380	-0.0645429	2.32802e-12		AT4G16760	0.010402	9.37638e-08		AT3G11280	-0.0286633	6.1504e-07		AT3G55800	0.0125414	6.30042e-06		AT5G28510	0.0258744	5.59086e-14
AT2G04350	0.0208235	2.35279e-12		AT2G29450	0.0162805	1.08272e-07		AT5G65970	-0.0351046	6.1504e-07		AT5G01740	-0.00724129	6.30042e-06		AT2G34850	0.00900107	5.88124e-14
AT1G44010	-0.108474	2.6774e-12		AT2G38530	0.0195348	1.23587e-07		AT4G33420	-0.0304144	6.3887e-07		AT1G11190	-0.00543636	6.31345e-06		AT4G25090	-0.0145905	6.1343e-14
AT4G10960	0.0367603	3.13683e-12		AT5G19850	0.0170097	1.27464e-07		AT2G35150	-0.0385322	6.4368e-07		AT1G72900	0.00690416	6.52973e-06		AT4G12800	0.0119012	7.00123e-14
AT1G17190	0.0484799	3.14104e-12		AT5G51890	0.0278726	1.29848e-07		AT1G71880	-0.0331005	6.77356e-07		AT1G01190	-0.00495789	6.6568e-06		AT1G68620	-0.00863302	7.12675e-14
AT1G13110	-0.0325041	3.26672e-12		AT4G23670	0.0156462	1.31514e-07		AT3G19200	0.0413744	6.91238e-07		AT1G06473	0.00746812	6.69736e-06		AT5G35735	0.0061086	7.12675e-14
AT2G37805	-0.0855779	3.26672e-12		AT1G66980	-0.0349585	1.37324e-07		AT3G18200	-0.0287382	7.83103e-07		AT5G42580	-0.0101596	6.9958e-06		AT3G21340	-0.0137162	9.49285e-14
AT2G15970	0.0370212	3.38134e-12		AT2G37900	0.0654302	1.39573e-07		AT3G56970	-0.096888	8.10894e-07		AT5G65480	0.00394475	7.24206e-06		AT4G18280	0.0110834	9.85079e-14
AT1G05340	0.0460673	3.64036e-12		AT2G39310	0.0157846	1.44277e-07		AT4G35290	-0.0398462	8.10894e-07		AT2G47810	0.00691538	7.32411e-06		AT1G29860	0.0124367	9.96528e-14
AT1G23160	0.0530601	4.28747e-12		AT4G37030	-0.0172933	1.49173e-07		AT2G37240	0.0383027	8.59234e-07		AT5G13750	0.00412477	7.32428e-06		AT4G19840	0.0066141	1.12162e-13
AT5G10230	0.0428272	4.90671e-12		AT5G61420	-0.0180028	1.5163e-07		AT5G65400	0.0417286	9.67695e-07		AT1G55290	-0.0101208	7.89722e-06		AT4G37610	-0.0121344	1.19295e-13
AT1G76690	0.0294836	5.62189e-12		AT3G11280	-0.0129296	1.54076e-07		AT3G21560	-0.0482344	9.9953e-07		AT1G64200	-0.00371466	7.92741e-06		AT1G63240	0.00947839	1.19742e-13
AT1G53560	0.04543	5.90703e-12		AT3G60700	-0.0391057	1.55669e-07		AT5G52120	-0.0594348	1.02801e-06		AT5G38410	0.0224508	8.77438e-06		AT4G28750	0.0151598	1.3364e-13
AT1G17550	0.0186865	5.9448e-12		AT5G06370	0.00857562	1.60843e-07		AT3G29035	-0.0213861	1.05329e-06		AT3G60300	0.00463847	8.90491e-06		AT5G45350	0.00679256	1.36972e-13
AT2G34500	0.0466153	7.53501e-12		AT2G43020	0.0102708	1.63947e-07		AT3G21690	-0.0291041	1.08971e-06		AT2G22590	0.010471	9.0256e-06		AT1G77090	0.0138771	1.5932e-13
AT1G33055	-0.0942981	8.35427e-12		AT1G53130	0.0501181	1.77916e-07		AT1G03220	-0.0305317	1.09527e-06		AT3G44290	0.00719134	9.0256e-06		AT5G17460	0.00831756	1.84785e-13
AT1G33870	-0.0825105	8.88899e-12		AT2G15970	0.01191	1.82055e-07		AT3G58270	0.0528438	1.10297e-06		AT3G16410	-0.00485368	9.8507e-06		AT2G28470	-0.00928875	2.07098e-13
AT3G54140	0.0231021	9.21359e-12		AT1G62710	0.0157522	1.87168e-07		AT3G47600	0.0487868	1.11419e-06		AT5G12270	-0.00539962	9.8507e-06		AT3G03341	0.0250914	2.10153e-13
AT4G25700	0.0432857	9.21359e-12		AT1G08090	-0.0345228	1.90835e-07		AT1G14185	-0.0733494	1.14134e-06		AT5G06630	-0.0192495	9.85835e-06		AT2G43050	-0.011795	2.18197e-13
AT5G14200	-0.0212301	9.83216e-12		AT1G73040	0.0314915	1.94541e-07		AT1G18870	-0.0595838	1.14869e-06		AT5G19790	-0.00809487	9.85835e-06		AT5G54270	0.00866933	2.38013e-13
AT2G20080	0.0398606	1.03781e-11		AT1G17430	-0.0133161	1.98111e-07		AT1G61480	-0.042548	1.1501e-06		AT5G43403	0.00502753	1.00749e-05		AT5G49990	0.00519832	2.45132e-13
AT1G26240	-0.0977718	1.1434e-11		AT3G23920	0.011136	1.98111e-07		AT1G77520	-0.0553725	1.1501e-06		AT3G18130	-0.00286753	1.01878e-05		AT5G51110	0.0122064	2.82865e-13
AT4G36610	0.026424	1.17451e-11		AT1G54100	0.0133184	2.04833e-07		AT5G64550	0.0436191	1.1636e-06		AT1G52820	-0.00508289	1.0766e-05		AT4G22214	-0.0152045	3.25988e-13
AT4G38400	0.0396776	1.42796e-11		AT1G75590	0.0168862	2.11158e-07		AT4G15410	0.0238153	1.21957e-06		AT2G02120	0.00862915	1.08478e-05		AT1G18720	0.00495908	3.45741e-13
AT2G44340	-0.0540464	1.56353e-11		AT5G07580	-0.0143407	2.2055e-07		AT1G17960	0.0443314	1.257e-06		AT1G01470	0.00539587	1.11146e-05		AT2G23120	0.00869472	4.13019e-13
AT1G55240	0.0364694	1.58981e-11		AT1G51420	0.00901104	2.33966e-07		AT1G49470	-0.0311006	1.31688e-06		AT1G23560	0.00551163	1.13466e-05		AT2G46680	0.00540341	4.29736e-13
AT3G16450	0.0265487	1.66185e-11		AT5G03435	-0.0277381	2.47627e-07		AT1G19660	-0.0372071	1.33771e-06		AT3G47340	0.00768754	1.24278e-05		AT4G09420	0.00893329	4.29736e-13
AT4G25410	0.0423156	1.72083e-11		AT4G17970	0.016608	2.5645e-07		AT2G19060	-0.0573927	1.33771e-06		AT5G02840	0.00310559	1.26263e-05		AT3G27250	0.0128441	5.20642e-13
AT1G49570	-0.0314814	1.74751e-11		AT2G43050	-0.0275656	2.67381e-07		AT5G01740	-0.0799136	1.34744e-06		AT3G26040	-0.00724922	1.27964e-05		AT3G52880	0.00534451	5.20642e-13
AT5G23010	-0.0346303	1.87509e-11		AT3G09910	0.0179102	2.88077e-07		AT3G57157	-0.0413678	1.44698e-06		AT3G03341	0.016057	1.33628e-05		AT1G15820	0.00911924	5.37525e-13
AT1G64110	0.0501195	2.20388e-11		AT3G46280	-0.0169321	2.89085e-07		AT5G41800	0.0364668	1.51484e-06		AT3G20440	-0.00598708	1.33628e-05		AT5G49360	-0.0118278	5.66746e-13
AT4G28840	0.0463407	2.32977e-11		AT4G33560	0.0325992	2.98609e-07		AT2G38860	0.0178894	1.53857e-06		AT4G13390	-0.0255015	1.34947e-05		AT5G13910	0.00680794	5.74562e-13
AT3G16420	0.0161746	2.33528e-11		AT5G12270	-0.0208958	3.20089e-07		AT5G47560	-0.0319357	1.53857e-06		AT2G47550	-0.0077643	1.37094e-05		AT5G40540	0.00746597	5.78806e-13
AT1G08440	0.0680064	2.5407e-11		AT3G11410	0.0098727	3.24356e-07		AT4G22070	-0.0252598	1.61423e-06		AT3G18200	-0.00459963	1.47232e-05		AT3G54260	0.0080085	5.83295e-13
AT2G35980	0.0387779	2.74386e-11		AT4G38660	-0.0123873	3.28319e-07		AT4G20820	-0.0554238	1.63683e-06		AT1G60740	0.00720503	1.51053e-05		AT2G45360	0.0301396	6.4026e-13
AT5G23820	0.0263167	2.79461e-11		AT4G39330	0.0175499	3.5784e-07		AT5G44530	-0.0300566	1.64913e-06		AT3G48920	0.0051572	1.60709e-05		AT5G27920	-0.00603025	6.60672e-13
AT2G17850	-0.130835	2.88678e-11		AT1G69260	0.0148456	3.65931e-07		AT2G15620	0.0295211	1.75503e-06		AT2G43050	-0.00550393	1.6857e-05		AT1G17100	0.0103043	6.79236e-13
AT3G45710	0.0278622	3.206e-11		AT3G47220	-0.015219	3.6595e-07		AT1G23090	-0.0706176	1.75954e-06		AT2G43500	0.00469398	1.71293e-05		AT3G04720	0.00811885	6.9438e-13
AT3G54065	-0.0787561	3.206e-11		AT4G11220	0.00828598	4.31126e-07		AT4G02050	-0.032889	1.75954e-06		AT1G32900	0.0083934	1.71611e-05		AT5G12140	0.0075225	6.97229e-13
AT1G76790	0.0363219	3.4047e-11		AT5G26260	0.0119471	4.36414e-07		AT5G01250	-0.0350154	1.81509e-06		AT2G26355	0.00667858	1.72614e-05		AT1G01340	-0.00835982	8.89641e-13
AT1G77450	0.0386427	3.63519e-11		AT3G50970	0.0156315	4.43214e-07		AT3G45680	-0.0535673	1.83207e-06		AT4G30270	-0.00720137	1.8352e-05		AT2G44480	0.00866833	1.03604e-12
AT5G52830	-0.0360089	3.70519e-11		AT1G61590	-0.0102537	4.58257e-07		AT1G57820	0.0270915	1.87104e-06		AT2G01530	-0.00269945	1.85111e-05		AT5G52790	-0.0130589	1.05109e-12
AT1G50050	-0.0515983	4.01149e-11		AT3G45130	-0.0183674	4.70704e-07		AT2G39310	-0.0301404	1.90109e-06		AT5G49645	0.00728599	1.85926e-05		AT3G26070	0.00847595	1.06219e-12
AT1G78680	0.0197898	4.39963e-11		AT1G59780	-0.0176381	4.71613e-07		AT3G52060	-0.043848	1.93405e-06		AT4G03280	0.00816488	1.88916e-05		AT1G60200	-0.00403889	1.20718e-12
AT1G78860	-0.0364222	4.46981e-11		AT3G17820	0.00880925	4.83479e-07		AT3G09680	0.0627791	2.00937e-06		AT1G72150	-0.00335463	1.94979e-05		AT3G13760	-0.0107949	1.31679e-12
AT1G21100	0.0418005	5.44893e-11		AT2G27550	0.0244407	4.91689e-07		AT1G53430	-0.0234541	2.01375e-06		AT2G34690	0.00318708	1.94979e-05		AT5G02790	0.00511217	1.35314e-12
AT1G24280	-0.0291388	5.92078e-11		AT4G00760	-0.0139257	5.23779e-07		AT5G51440	0.0668594	2.0455e-06		AT4G08570	0.00385756	1.94979e-05		AT3G44190	-0.00503013	1.36078e-12
AT2G28470	0.0257919	5.92078e-11		AT5G64100	-0.0192488	5.56445e-07		AT5G11210	-0.0482721	2.09887e-06		AT1G29920	0.0233435	1.97074e-05		AT1G60890	0.00620032	1.39406e-12
AT1G43710	-0.0152901	7.208e-11		AT5G49360	-0.0215976	6.03237e-07		AT3G01760	-0.121252	2.25664e-06		AT2G46860	-0.00833715	2.03043e-05		AT3G59670	-0.00586768	1.49793e-12
AT1G54970	0.0390174	7.21113e-11		AT2G25000	0.0122899	6.40331e-07		AT4G27400	-0.0567595	2.38554e-06		AT3G51895	0.00880658	2.03043e-05		AT4G25433	0.0160848	1.49811e-12
AT2G15620	-0.0233701	7.33496e-11		AT5G19730	0.0165807	7.29363e-07		AT1G79270	-0.0257868	2.44138e-06		AT1G52870	0.00760056	2.06533e-05		AT4G11210	-0.0139023	1.53122e-12
AT3G27570	-0.0177016	7.98571e-11		AT3G13784	0.0386758	7.46467e-07		AT3G51600	0.0539994	2.5144e-06		AT5G39970	-0.00463955	2.06968e-05		AT1G32940	-0.00619591	1.53476e-12
AT5G06760	0.0962834	8.2208e-11		AT4G01970	-0.049451	7.96961e-07		AT1G73490	0.01937	2.57238e-06		AT5G07580	-0.00514107	2.13501e-05		AT3G11600	0.00931714	1.60705e-12
AT1G22440	0.0212326	8.26445e-11		AT4G25000	-0.0293381	7.96961e-07		AT2G41730	0.076607	2.60141e-06		AT3G47490	0.0040735	2.16052e-05		AT3G09910	0.00836739	1.72899e-12
AT2G19210	-0.0510912	8.26445e-11		AT1G61480	-0.0154239	8.22575e-07		AT1G19080	0.0335989	2.69241e-06		AT3G62190	0.00399606	2.16052e-05		AT5G43520	-0.0139258	1.81563e-12
AT3G21700	0.0298234	9.60494e-11		AT3G11010	-0.0163535	8.26427e-07		AT3G29240	-0.0643624	2.78737e-06		AT4G07960	-0.0106774	2.16052e-05		AT5G10230	-0.0112826	1.87958e-12
AT5G41670	-0.0180117	1.00825e-10		AT2G25930	-0.0104836	8.84433e-07		AT5G41765	0.07619	2.8229e-06		AT3G60140	0.00863562	2.17083e-05		AT3G26290	0.00708938	2.00995e-12
AT1G73330	0.0259007	1.01347e-10		AT4G11880	-0.0134293	8.8478e-07		AT3G14067	-0.0259344	2.91561e-06		AT2G39510	0.0047691	2.20846e-05		AT4G32460	0.00608422	2.00995e-12
AT4G05100	0.0510898	1.0209e-10		AT4G29930	0.0142681	8.8478e-07		AT1G70170	-0.0401403	2.93621e-06		AT2G24260	0.00330285	2.21361e-05		AT4G36670	0.0149905	2.01581e-12
AT4G24340	0.0322302	1.1544e-10		AT2G28250	-0.0126	8.86374e-07		AT5G57390	0.0431603	2.93621e-06		AT3G46170	-0.00638706	2.2433e-05		AT3G57470	-0.00591021	2.03653e-12
AT1G80830	-0.0265858	1.21615e-10		AT2G23120	0.0173759	9.77602e-07		AT2G14100	-0.071455	3.00285e-06		AT2G46270	0.00551769	2.28427e-05		AT2G47260	0.00548698	2.05206e-12
AT1G01340	-0.0390826	1.32147e-10		AT2G41290	0.0177088	9.77602e-07		AT2G40460	-0.0288238	3.02786e-06		AT4G34320	-0.0124697	2.31479e-05		AT1G76680	-0.00897711	2.1061e-12
AT1G58320	0.051563	1.32147e-10		AT3G03670	-0.0664331	9.77602e-07		AT5G22800	0.0534071	3.02786e-06		AT2G34850	0.00552354	2.34686e-05		AT1G52800	-0.0119032	2.19505e-12
AT2G22430	0.0183552	1.66034e-10		AT3G54820	0.0178794	9.77602e-07		AT2G22990	-0.0919036	3.13903e-06		AT2G40900	0.00410167	2.50758e-05		AT5G43180	0.00577434	2.53293e-12
AT5G19880	0.0610222	1.95863e-10		AT4G18020	0.010124	9.77602e-07		AT4G18010	-0.0328341	3.14811e-06		AT4G28850	-0.0187987	2.60076e-05		AT1G10300	-0.0155027	2.60665e-12
AT2G45550	-0.0417322	2.01553e-10		AT5G06720	0.0215257	9.77602e-07		AT4G15960	-0.0335759	3.14899e-06		AT1G75810	0.00452991	2.62225e-05		AT1G17190	-0.0101691	2.63149e-12
AT5G05440	-0.0463373	2.02857e-10		AT5G19875	0.0151799	9.77602e-07		AT5G09620	-0.0202931	3.20829e-06		AT1G04870	-0.002705	2.6378e-05		AT3G01290	-0.0123399	2.68046e-12
AT3G16410	0.0290503	2.10173e-10		AT1G21250	-0.0565058	1.04302e-06		AT5G15150	-0.0277128	3.20829e-06		AT1G22550	-0.00374925	2.6378e-05		AT1G53430	-0.00491179	2.74288e-12
AT4G37060	-0.075671	2.10173e-10		AT5G57685	-0.0171184	1.05119e-06		AT5G03555	-0.0330176	3.38351e-06		AT5G19850	0.00469459	2.66751e-05		AT4G00780	-0.0126011	2.74288e-12
AT2G26040	-0.0645281	2.22025e-10		AT4G33120	0.0202117	1.07414e-06		AT5G56740	0.0220332	3.47883e-06		AT4G02060	-0.00408146	2.69397e-05		AT1G08090	0.0126173	2.80622e-12
AT4G23980	0.0190989	2.48997e-10		AT1G28100	-0.0203468	1.07707e-06		AT1G64210	-0.0553399	3.55186e-06		AT5G37260	0.00606549	2.69397e-05		AT1G73280	-0.0108668	2.80622e-12
AT3G24310	0.0401241	2.66e-10		AT2G36690	-0.0187034	1.08312e-06		AT1G17430	-0.0287956	3.6794e-06		AT1G73580	-0.00650014	2.73075e-05		AT2G25450	0.00639597	2.80867e-12
AT2G14247	-0.0709426	2.72324e-10		AT2G04350	0.0128363	1.10616e-06		AT5G26220	0.0391308	3.68136e-06		AT3G09950	0.00800679	2.73075e-05		AT4G01550	0.00595874	3.06456e-12
AT3G07270	-0.019002	2.91683e-10		AT3G51350	-0.0219978	1.10785e-06		AT1G30360	-0.0202197	3.76834e-06		AT3G13750	-0.00364307	2.73075e-05		AT3G02830	0.00555278	3.40143e-12
AT2G48080	-0.0421197	2.95651e-10		AT1G51830	-0.0145684	1.12682e-06		AT2G47800	-0.0313721	3.79734e-06		AT2G47780	0.0149136	2.7332e-05		AT4G28080	0.00698994	3.40687e-12
AT2G34610	0.0803749	3.01651e-10		AT5G42590	0.0171991	1.14565e-06		AT1G22230	-0.030904	4.03924e-06		AT1G52710	0.00470274	2.84876e-05		AT3G10450	0.0103324	3.45288e-12
AT3G29970	-0.147951	3.52339e-10		AT3G28360	0.0540013	1.16945e-06		AT2G38940	0.0310924	4.03924e-06		AT3G14560	0.00419044	3.02701e-05		AT4G07820	0.00994369	3.45288e-12
AT5G09530	0.0250575	3.60038e-10		AT5G24380	0.017193	1.30667e-06		AT1G23020	-0.0226437	4.04972e-06		AT3G01670	-0.00488358	3.12776e-05		AT1G68840	-0.00755797	3.50138e-12
AT1G08650	0.0168761	3.97455e-10		AT1G22360	0.0108535	1.32419e-06		AT5G02090	-0.0424237	4.04972e-06		AT2G41210	0.00525439	3.52451e-05		AT2G33540	-0.00564461	3.54928e-12
AT1G73480	0.0299388	3.97658e-10		AT3G51910	-0.0225633	1.35359e-06		AT1G18140	-0.0359438	4.07242e-06		AT5G13060	-0.00550651	3.52818e-05		AT5G38530	0.0041023	3.54928e-12
AT4G39675	-0.088955	4.03167e-10		AT2G13810	-0.0225631	1.35903e-06		AT1G26970	-0.03915	4.07242e-06		AT4G15290	-0.00963703	3.54721e-05		AT4G01630	0.00752218	3.91588e-12
AT5G02230	0.02794	4.14173e-10		AT5G24080	0.0284892	1.37055e-06		AT3G04770	0.0233928	4.07242e-06		AT4G29820	0.00409714	3.94332e-05		AT5G65990	0.00867437	3.93902e-12
AT2G31540	0.0605321	4.20408e-10		AT4G12580	0.0209472	1.42032e-06		AT5G25610	0.0395519	4.13225e-06		AT5G22020	0.00673377	3.97754e-05		AT5G64040	0.00857559	4.00341e-12
AT1G74460	0.0221915	4.43587e-10		AT2G43550	-0.0242724	1.44099e-06		AT5G49360	-0.0698715	4.17387e-06		AT5G43580	0.00772493	3.97754e-05		AT5G19770	-0.00337114	4.11042e-12
AT4G36740	0.0697737	4.7872e-10		AT4G34180	0.00826877	1.51366e-06		AT1G13710	-0.0774362	4.24789e-06		AT3G18440	0.00238041	3.99187e-05		AT3G21055	0.00950723	4.73888e-12
AT4G34230	0.0168218	5.35081e-10		AT5G66700	-0.0224588	1.55008e-06		AT3G09330	-0.0717286	4.31428e-06		AT4G33420	0.00388685	4.00723e-05		AT1G73920	0.00687568	4.85037e-12
AT1G12090	-0.0408662	5.42581e-10		AT2G36460	0.0070921	1.65189e-06		AT1G66970	-0.0873756	4.36988e-06		AT1G02230	0.00664878	4.13636e-05		AT2G31160	0.00896122	4.91745e-12
AT5G05790	-0.0268925	5.72841e-10		AT5G38700	0.0262805	1.65338e-06		AT2G05380	-0.0659624	4.50834e-06		AT1G78230	-0.0093136	4.18808e-05		AT3G01260	-0.00692534	5.06958e-12
AT4G10310	0.0366685	6.47833e-10		AT5G47980	0.0166706	1.87795e-06		AT5G22630	-0.0214033	4.50834e-06		AT3G32040	-0.00699429	4.26284e-05		AT2G35490	0.00591577	5.14468e-12
AT4G07820	-0.0401642	6.59093e-10		AT4G16260	0.0166645	1.91322e-06		AT3G21070	-0.0256497	4.51929e-06		AT5G66460	0.00407717	4.26284e-05		AT1G30380	0.0102246	5.83905e-12
AT1G28260	0.0316187	7.0579e-10		AT1G53940	-0.0534797	2.05463e-06		AT4G36880	-0.0439853	5.00249e-06		AT2G05620	0.00515096	4.45209e-05		AT1G12900	0.0133163	5.93172e-12
AT5G26340	0.0328699	7.29596e-10		AT5G04120	0.0277803	2.06723e-06		AT1G13750	-0.031449	5.01188e-06		AT5G43450	0.00826147	4.45209e-05		AT4G22666	-0.010115	5.98995e-12
AT3G08860	0.0420617	7.33735e-10		AT1G80160	0.038767	2.23862e-06		AT3G61890	-0.0397639	5.0722e-06		AT1G24575	-0.00505225	4.612e-05		AT1G80830	0.00796139	6.06904e-12
AT5G07390	-0.0263338	7.45404e-10		AT3G52340	0.0119418	2.2986e-06		AT1G48800	-0.0555534	5.23012e-06		AT2G45510	0.00284019	4.68985e-05		AT3G45840	-0.0127935	6.06904e-12
AT2G35380	0.0278555	7.74739e-10		AT4G32770	0.0157303	2.31084e-06		AT3G53150	-0.0439385	5.47716e-06		AT2G46420	0.00462473	4.83025e-05		AT1G68010	0.014406	6.47678e-12
AT2G22770	0.0234568	8.81668e-10		AT2G05440	0.0129777	2.33939e-06		AT5G49770	-0.0358829	5.48031e-06		AT4G34190	0.00452977	4.98068e-05		AT5G66670	0.0107491	6.67084e-12
AT5G54980	0.0397116	9.43261e-10		AT2G43610	0.0137732	2.40709e-06		AT5G56870	-0.0567843	5.53118e-06		AT5G15190	0.00684308	5.01767e-05		AT1G56300	0.0120644	6.67377e-12
AT4G01250	-0.039615	9.45016e-10		AT3G48000	0.0117922	2.40709e-06		AT5G55630	-0.0313249	5.55758e-06		AT2G34860	0.00444308	5.05561e-05		AT4G37940	0.00642156	7.06123e-12
AT4G09990	0.0275445	9.89559e-10		AT2G46680	0.0144216	2.46255e-06		AT5G58000	-0.021915	5.69184e-06		AT1G75640	-0.00459236	5.07575e-05		AT1G10480	0.00650895	7.24362e-12
AT4G14270	0.0253314	1.00046e-09		AT3G50910	0.00797401	2.62383e-06		AT2G42840	0.0437914	5.836e-06		AT4G35720	0.00550408	5.07958e-05		AT3G14620	0.0110856	7.24362e-12
AT1G60470	0.0413102	1.00396e-09		AT2G47230	-0.015028	2.63422e-06		AT2G40000	-0.0359155	5.97012e-06		AT5G11540	-0.00705584	5.07958e-05		AT2G29660	-0.00571121	7.59416e-12
AT4G33120	0.0390435	1.01929e-09		AT4G08250	-0.0170808	2.75068e-06		AT3G44735	0.0331455	6.14472e-06		AT3G05190	0.00438338	5.11449e-05		AT3G02610	0.0120428	7.83443e-12
AT5G47950	0.03079	1.11722e-09		AT2G16630	0.0243852	2.79171e-06		AT4G25410	-0.0554789	6.37084e-06		AT3G18170	-0.00432179	5.17778e-05		AT1G52790	-0.0176034	7.91828e-12
AT1G14240	0.033624	1.12363e-09		AT5G50760	-0.0210113	2.80385e-06		AT4G01883	0.0477123	6.59786e-06		AT2G21790	-0.003454	5.26827e-05		AT1G49310	0.00729761	8.31242e-12
AT1G26390	0.0557558	1.17417e-09		AT2G20560	0.0141684	2.87773e-06		AT1G30730	-0.0485142	6.60811e-06		AT3G10710	-0.0104764	5.26827e-05		AT4G04570	-0.0182962	8.69872e-12
AT4G25400	0.0410323	1.20564e-09		AT1G67360	0.0088887	2.88731e-06		AT5G18130	-0.0420299	6.9352e-06		AT1G63020	-0.00543093	5.33965e-05		AT4G19390	0.013565	8.99171e-12
AT3G47720	-0.114443	1.22526e-09		AT1G77090	0.0272559	2.8981e-06		AT1G72490	-0.058922	6.93564e-06		AT2G15970	0.00430674	5.36675e-05		AT3G53190	-0.00614768	9.06939e-12
AT5G66400	0.0762383	1.27763e-09		AT1G03700	-0.0176458	2.99262e-06		AT3G24440	0.0229908	7.10567e-06		AT5G24100	-0.00381741	5.4081e-05		AT1G73220	0.00852173	9.38075e-12
AT3G21070	0.0172163	1.28416e-09		AT4G11360	-0.0123049	3.05294e-06		AT5G40850	0.0246734	7.2733e-06		AT1G03870	-0.00388472	5.51246e-05		AT4G23920	0.00709742	9.72207e-12
AT5G00580	0.0961886	1.35396e-09		AT1G11840	0.0109494	3.18024e-06		AT3G27150	0.027027	7.28651e-06		AT5G03880	0.00329504	5.52163e-05		AT5G25190	0.0124434	9.95721e-12
AT5G23840	0.0313788	1.55017e-09		AT3G16390	-0.02424	3.18024e-06		AT5G07570	-0.102862	7.41235e-06		AT5G24270	0.00549082	5.53675e-05		AT3G01820	0.00617364	1.11042e-11
AT1G23190	0.0146355	1.57729e-09		AT4G22790	-0.019894	3.28693e-06		AT4G37700	-0.0788087	7.51583e-06		AT4G30960	0.00326546	5.68647e-05		AT1G55840	0.00385162	1.31805e-11
AT1G08920	0.0260387	1.84028e-09		AT5G36160	0.00911674	3.35827e-06		AT1G07370	0.0247127	7.69215e-06		AT1G63420	0.00341153	5.74159e-05		AT5G54370	0.00949826	1.3415e-11
AT2G15220	0.024082	1.86747e-09		AT3G03341	0.0568465	3.47043e-06		AT4G37050	-0.0495333	7.77558e-06		AT4G05520	-0.00433272	5.8855e-05		AT5G48480	0.00623994	1.35413e-11
AT1G32380	-0.0216659	1.87929e-09		AT5G60520	0.0143299	3.56861e-06		AT3G23190	-0.0312617	7.78872e-06		AT1G34510	-0.0290544	5.90623e-05		AT5G18860	-0.00733537	1.36691e-11
AT5G59320	0.036671	1.90525e-09		AT1G23760	-0.0176514	3.57391e-06		AT5G62430	-0.0465662	7.78872e-06		AT2G44110	-0.00595002	5.94239e-05		AT5G56080	0.0126351	1.39606e-11
AT5G24660	0.0425914	1.9442e-09		AT4G01985	0.0944804	3.78067e-06		AT1G07560	-0.0313711	8.13243e-06		AT3G63540	0.00614893	6.0035e-05		AT3G47780	-0.00740641	1.67464e-11
AT3G51340	-0.0323712	2.08182e-09		AT1G07560	-0.0157107	3.78358e-06		AT3G19010	-0.0242338	8.35997e-06		AT5G64905	0.00780651	6.08452e-05		AT5G64550	0.00706716	1.68695e-11
AT2G24850	0.0686895	2.16269e-09		AT4G37390	-0.0282929	3.80304e-06		AT4G16260	-0.0284663	8.42794e-06		AT3G45070	-0.00427993	6.1139e-05		AT4G00760	-0.00703923	1.69197e-11
AT1G16400	-0.0214188	2.16504e-09		AT2G33020	0.0238383	3.80694e-06		AT3G01420	-0.0384194	8.43651e-06		AT2G34430	0.0274966	6.14832e-05		AT5G02350	-0.00833595	1.74529e-11
AT3G12830	0.0252658	2.33108e-09		AT4G14390	-0.0214278	3.95085e-06		AT1G75590	0.0362357	8.68365e-06		AT2G08765	0.013935	6.14894e-05		AT3G19200	0.0121633	1.75806e-11
AT5G65280	0.0302969	2.33108e-09		AT3G17690	-0.0312929	4.28149e-06		AT1G76040	-0.0288356	8.74966e-06		AT2G39570	0.00358619	6.27357e-05		AT1G50060	0.0109339	1.82876e-11
AT3G25730	-0.0306401	2.41459e-09		AT5G53160	-0.0119143	4.3248e-06		AT1G13510	-0.0474281	8.82974e-06		AT4G17550	0.0041948	6.27357e-05		AT2G32090	0.00791493	1.83423e-11
AT5G57050	0.0344241	2.44608e-09		AT1G70880	-0.018532	4.43254e-06		AT3G20370	-0.0232892	8.86696e-06		AT4G26850	0.00405429	6.3607e-05		AT5G19850	0.00860078	1.90125e-11
AT5G67620	0.0298157	2.54376e-09		AT3G03910	-0.0317301	4.47675e-06		AT2G45170	-0.0404144	8.92063e-06		AT5G51110	0.0059858	6.51468e-05		AT1G14220	-0.012646	1.97556e-11
AT5G06300	0.0238581	2.82089e-09		AT2G04160	0.0137229	4.72884e-06		AT3G58160	0.0364859	8.93055e-06		AT1G56120	-0.00695167	6.66318e-05		AT3G54720	-0.00848094	2.08545e-11
AT5G02170	0.0419577	2.84224e-09		AT5G07570	-0.0631137	4.77099e-06		AT3G01670	-0.0323865	9.08881e-06		AT5G19770	-0.00276972	6.88718e-05		AT1G20010	-0.00493106	2.11845e-11
AT2G47600	0.0237942	3.10253e-09		AT1G15540	-0.0218617	4.83478e-06		AT5G05060	0.0423654	9.29624e-06		AT5G54840	0.0035922	6.88718e-05		AT2G42330	-0.0068449	2.1676e-11
AT5G06530	0.0564996	3.36851e-09		AT1G24575	-0.0195511	5.10081e-06		AT3G03650	-0.0423492	9.36071e-06		AT1G16370	-0.0068613	7.10212e-05		AT3G29410	-0.00915362	2.18949e-11
AT2G38310	-0.0429502	3.37349e-09		AT1G69480	0.0212145	5.11618e-06		AT1G01600	0.0400897	9.37472e-06		AT3G16220	0.00475145	7.10212e-05		AT5G44340	-0.00326058	2.19447e-11
AT3G54200	0.0288429	3.64808e-09		AT1G05590	-0.0113144	5.24457e-06		AT3G03910	-0.0834876	9.40501e-06		AT5G23810	0.00856458	7.12451e-05		AT4G19960	0.0073298	2.25863e-11
AT5G36180	0.0315066	3.80725e-09		AT1G75170	0.00912046	5.41365e-06		AT3G32040	-0.047153	9.43006e-06		AT3G07070	-0.00687034	7.53442e-05		AT4G28840	-0.010119	2.3596e-11
AT2G43570	0.0254969	3.92023e-09		AT3G47420	0.0196863	5.56573e-06		AT4G23180	-0.0688931	9.43006e-06		AT3G45140	0.023871	7.58879e-05		AT5G15960	0.0216252	2.4287e-11
AT5G44730	-0.0398888	4.6305e-09		AT2G43140	-0.036902	5.58726e-06		AT5G14200	-0.0299157	9.49703e-06		AT3G27020	-0.00343716	7.75185e-05		AT4G03110	-0.00546263	2.55801e-11
AT4G39030	0.0172572	5.26117e-09		AT1G08230	0.015696	5.62852e-06		AT5G23570	0.0237265	9.65382e-06		AT1G02640	-0.00488348	7.79468e-05		AT3G14680	0.0114178	2.56514e-11
AT3G46400	-0.0661916	5.28422e-09		AT1G06570	0.0119451	5.82023e-06		AT4G37610	-0.0478558	9.73811e-06		AT4G04020	0.00542299	8.08141e-05		AT1G69410	0.00654032	2.7004e-11
AT1G27740	0.0332596	5.47333e-09		AT1G15960	0.032687	5.82023e-06		AT1G30210	0.0340681	1.00175e-05		AT4G40090	-0.00825915	8.14516e-05		AT1G72830	0.00531093	3.02753e-11
AT4G11230	-0.0471744	5.47333e-09		AT3G26330	-0.016053	5.82023e-06		AT2G36010	0.0232896	1.01957e-05		AT4G24340	-0.00481693	8.18916e-05		AT4G18020	0.00626691	3.02753e-11
AT5G60760	-0.0369707	5.4917e-09		AT5G16040	0.0108112	6.01191e-06		AT4G13420	-0.124188	1.0279e-05		AT2G34720	0.003767	8.21342e-05		AT1G33560	0.0051658	3.16388e-11
AT3G49570	0.0420697	5.55055e-09		AT1G53430	-0.0120644	6.05535e-06		AT4G15560	-0.0300313	1.03244e-05		AT3G16150	0.00568712	8.33649e-05		AT2G37870	0.0221163	3.4162e-11
AT3G22370	0.0378598	5.67602e-09		AT3G54720	-0.0125114	6.1704e-06		AT1G78370	-0.0176933	1.08614e-05		AT5G18310	0.00352965	8.33649e-05		AT2G01950	-0.00721859	3.70975e-11
AT1G64950	0.0407394	5.89026e-09		AT1G74940	-0.0131483	6.43568e-06		AT3G05690	0.0276139	1.11795e-05		AT5G61350	-0.00699983	8.33649e-05		AT3G51490	0.0122914	3.72558e-11
AT2G24720	-0.0323358	6.28097e-09		AT1G28600	0.0163837	6.46403e-06		AT1G70530	-0.0214034	1.13059e-05		AT3G14690	0.00377926	8.37706e-05		AT5G11570	-0.00657559	3.96725e-11
AT3G09260	0.0221647	6.49195e-09		AT5G14880	-0.0124654	6.85864e-06		AT5G15960	0.0608148	1.15339e-05		AT3G45650	-0.00481122	8.49208e-05		AT5G19875	0.00672707	4.02418e-11
AT4G37850	0.0718963	6.6284e-09		AT2G14210	0.030652	7.40671e-06		AT5G05890	-0.0362942	1.23875e-05		AT1G12560	-0.00692944	8.75814e-05		AT1G65900	0.00755892	4.02422e-11
AT5G51310	-0.0367465	6.76453e-09		AT4G20070	-0.016019	7.49714e-06		AT5G12980	0.0279768	1.25149e-05		AT3G27690	0.0228104	8.75814e-05		AT3G58990	-0.0071506	4.20261e-11
AT5G03570	-0.0219589	7.34321e-09		AT1G53790	0.0190568	7.55395e-06		AT3G60130	-0.0234274	1.34699e-05		AT1G03130	0.0124532	8.81494e-05		AT4G00910	0.00747707	4.40633e-11
AT1G25230	0.0190842	7.39905e-09		AT5G57050	0.0112826	7.57377e-06		AT5G06110	0.0192487	1.34699e-05		AT2G43610	0.00342264	8.81494e-05		AT4G30650	0.0103023	4.49044e-11
AT1G13090	0.0304349	7.65607e-09		AT5G11670	-0.0112027	7.65086e-06		AT1G79320	-0.0522639	1.35099e-05		AT3G19660	0.00441104	8.88654e-05		AT1G54780	0.00915844	4.82719e-11
AT1G01240	0.0233996	7.75559e-09		AT4G17785	-0.0273131	7.72331e-06		AT5G16970	0.0384204	1.3605e-05		AT2G15960	0.00938283	9.19327e-05		AT3G25780	0.00518816	4.88621e-11
AT2G42060	-0.036026	8.56494e-09		AT5G53990	0.0122048	7.76091e-06		AT1G18180	-0.0489156	1.38364e-05		AT3G12320	0.00449115	9.19327e-05		AT3G16770	0.00952286	5.0421e-11
AT4G08620	-0.039327	8.56494e-09		AT4G01870	0.0116621	7.78629e-06		AT5G13490	0.0285239	1.42616e-05		AT5G58330	0.00456281	9.26084e-05		AT1G73880	0.00608427	5.04937e-11
AT5G40800	0.0464891	8.74523e-09		AT4G21410	-0.0144387	7.94843e-06		AT4G08250	-0.0544954	1.42945e-05		AT3G10200	0.00709822	9.32334e-05		AT3G15840	0.0147234	5.08087e-11
AT3G29035	0.0312507	8.97788e-09		AT1G17300	-0.025929	8.04706e-06		AT4G23190	-0.033173	1.42945e-05		AT4G04955	-0.00315075	9.66047e-05		AT1G01620	-0.00497978	5.1641e-11
AT5G48850	0.0379309	9.42521e-09		AT1G58170	0.0130634	8.04706e-06		AT1G03010	-0.0460046	1.45895e-05		AT2G37240	0.0055916	9.71737e-05		AT5G36140	-0.031376	5.37319e-11
AT3G55740	0.0220945	9.48383e-09		AT2G28470	-0.0194728	8.04706e-06		AT4G00700	-0.0258246	1.4896e-05		AT1G58440	-0.00300458	9.73915e-05		AT4G13250	0.00593693	5.72503e-11
AT1G11680	-0.0206892	9.75968e-09		AT4G25010	0.0330368	8.04706e-06		AT5G19230	-0.0312606	1.50235e-05		AT1G02750	0.00411057	9.88181e-05		AT4G01140	-0.0105433	6.03281e-11
AT1G71695	-0.0374867	9.75968e-09		AT5G04970	0.0172881	8.08498e-06		AT2G25810	0.0221065	1.50441e-05		AT5G14740	0.037203	0.000100198		AT3G24080	-0.00512184	6.70778e-11
AT3G09400	-0.0646009	1.02947e-08		AT2G01900	-0.0235916	8.11446e-06		AT2G33530	-0.0335844	1.51195e-05		AT2G45220	-0.00818284	0.000102585		AT3G50350	-0.00851644	7.51839e-11
AT2G23120	0.0393799	1.15459e-08		AT2G33830	-0.0270555	8.62989e-06		AT4G16370	-0.0362108	1.55695e-05		AT3G15840	0.00968462	0.000103251		AT4G24780	-0.00791933	7.78313e-11
AT3G57540	0.0375339	1.17891e-08		AT2G16700	0.0112132	8.64781e-06		AT5G06900	-0.0713972	1.56144e-05		AT5G67430	0.00480033	0.000103251		AT1G01800	0.00540972	8.10873e-11
AT4G08780	-0.032291	1.22816e-08		AT1G06430	0.01535	8.79513e-06		AT4G31890	0.0292638	1.5633e-05		AT3G61890	0.00424471	0.000108192		AT2G16700	0.00693962	8.50793e-11
AT5G01220	0.0214612	1.31672e-08		AT5G28770	-0.0230278	9.09649e-06		AT1G80440	-0.0652291	1.58429e-05		AT1G76790	-0.00317792	0.000109923		AT1G13520	-0.00930072	8.56276e-11
AT3G54070	-0.0765686	1.33621e-08		AT1G21440	-0.0140671	9.62326e-06		AT2G16630	0.0518605	1.69319e-05		AT2G29500	0.00431807	0.000111472		AT4G22220	0.00405941	8.64104e-11
AT4G15990	0.0391061	1.38953e-08		AT2G42060	-0.0218178	9.6826e-06		AT1G15740	-0.0247604	1.70764e-05		AT5G66570	0.00530414	0.000112233		AT3G26330	-0.0121821	9.09361e-11
AT4G26080	0.0206741	1.41286e-08		AT5G12080	0.00880643	9.6826e-06		AT4G20210	-0.0454777	1.70764e-05		AT1G67365	0.00742128	0.000115237		AT2G26820	-0.00864991	9.1222e-11
AT4G19370	-0.0333349	1.58601e-08		AT1G27020	-0.020229	1.00357e-05		AT2G16005	-0.0916641	1.71424e-05		AT1G15960	0.0100641	0.000120277		AT3G60330	-0.0105578	9.1222e-11
AT5G26710	-0.0207518	1.67032e-08		AT1G05805	-0.0126072	1.00661e-05		AT1G70810	-0.0361157	1.72693e-05		AT2G26560	0.00765817	0.000120499		AT2G37240	0.00813113	9.43541e-11
AT1G14810	-0.0208783	1.8278e-08		AT2G40750	-0.0299181	1.01557e-05		AT1G49750	-0.0567812	1.7502e-05		AT1G67300	0.00238073	0.000120572		AT3G16690	-0.00781351	9.56103e-11
AT2G30550	0.0312248	1.99589e-08		AT2G31790	-0.020355	1.04211e-05		AT4G01950	0.023999	1.7502e-05		AT1G10740	0.00315836	0.00012208		AT2G31380	0.0102274	9.62719e-11
AT5G07450	0.0494439	2.03844e-08		AT1G80820	0.0118589	1.06705e-05		AT1G63530	-0.033695	1.77377e-05		AT5G16530	-0.00888571	0.00012208		AT5G46790	-0.0062883	9.91145e-11
AT1G28040	-0.073965	2.0949e-08		AT3G12520	0.0120755	1.09536e-05		AT3G52840	-0.0715319	1.78621e-05		AT1G63600	-0.0106215	0.000123235		AT1G60000	0.00989225	1.00437e-10
AT1G21210	-0.0411601	2.10193e-08		AT4G02860	0.00777209	1.10328e-05		AT4G39950	-0.0286135	1.8044e-05		AT5G44340	-0.00247312	0.000123235		AT1G07010	0.00840714	1.0088e-10
AT1G34540	0.0509112	2.1418e-08		AT5G40780	0.0259072	1.18857e-05		AT3G61390	-0.0473209	1.83143e-05		AT1G09350	-0.00858848	0.000125194		AT5G19780	-0.00424308	1.02421e-10
AT1G45249	0.017739	2.20076e-08		AT4G32290	-0.0148844	1.18968e-05		AT1G19180	-0.030015	1.83618e-05		AT5G43850	0.00300628	0.000128001		AT5G60520	0.00882185	1.06226e-10
AT2G37040	-0.0169706	2.20076e-08		AT5G43520	-0.0317375	1.27519e-05		AT4G16190	-0.0199982	1.87429e-05		AT3G54880	0.00381284	0.000128522		AT5G51160	0.00858984	1.06404e-10
AT1G27140	0.0322332	2.21148e-08		AT5G10580	0.0127062	1.30416e-05		AT4G25010	0.0700377	1.87494e-05		AT1G26410	0.0101247	0.000129414		AT1G64970	0.00780464	1.10383e-10
AT2G05530	-0.0798774	2.22642e-08		AT1G78370	-0.0152986	1.31333e-05		AT4G38810	-0.0267215	1.93712e-05		AT1G68490	0.00433398	0.00013008		AT2G04190	0.0185684	1.15842e-10
AT2G44798	-0.137955	2.24637e-08		AT1G54010	0.0128484	1.32885e-05		AT1G16370	-0.0666056	1.98667e-05		AT4G28703	0.00719505	0.000131384		AT4G28250	-0.00720017	1.17569e-10
AT5G01820	0.0316366	2.27417e-08		AT1G03010	-0.0200902	1.34165e-05		AT1G76890	-0.0304717	1.99447e-05		AT5G43180	0.00419506	0.000133923		AT1G79450	0.00526295	1.21217e-10
AT5G45490	-0.0246644	2.29136e-08		AT1G62770	-0.00985069	1.34165e-05		AT1G62710	0.0251172	2.0069e-05		AT3G50970	0.00598591	0.000134887		AT4G11830	-0.00482882	1.23614e-10
AT2G17840	0.0143167	2.3074e-08		AT4G20240	-0.0114594	1.35991e-05		AT4G15990	-0.0924761	2.04585e-05		AT5G12840	0.00452243	0.000136125		AT3G15300	0.00677508	1.24212e-10
AT5G10180	0.0405219	2.49177e-08		AT4G10350	0.019435	1.37451e-05		AT3G14660	-0.021964	2.04719e-05		AT5G54510	-0.00533992	0.000136125		AT1G16400	-0.0056197	1.25596e-10
AT1G50580	-0.0282207	2.53881e-08		AT1G51700	0.0109098	1.41079e-05		AT1G01110	0.0264356	2.17278e-05		AT4G18700	0.00358074	0.000136502		AT2G05100	0.0100913	1.29751e-10
AT5G13220	0.0435575	2.55409e-08		AT1G70720	0.0551644	1.41079e-05		AT3G09240	-0.0440675	2.22051e-05		AT1G26450	0.00569463	0.00013979		AT2G41800	0.00496821	1.3039e-10
AT4G11190	0.0328659	2.56605e-08		AT1G05680	0.0193109	1.41174e-05		AT1G10400	-0.0848598	2.23616e-05		AT1G34355	-0.00476579	0.000140004		AT4G37930	0.00526443	1.32323e-10
AT2G25680	-0.0382485	2.72314e-08		AT2G43100	-0.0174859	1.43702e-05		AT4G27710	-0.0414689	2.23616e-05		AT1G03840	-0.00463355	0.000140433		AT2G21250	0.00467704	1.33387e-10
AT1G20450	0.0198922	2.7326e-08		AT2G02020	-0.0120636	1.46014e-05		AT5G48650	0.0350187	2.25406e-05		AT4G27590	0.0133683	0.000140982		AT3G48940	-0.0219804	1.38304e-10
AT1G29730	-0.0327901	2.97738e-08		AT5G50400	0.0107037	1.4919e-05		AT1G64660	-0.0743048	2.25741e-05		AT3G13040	0.00302556	0.000143423		AT5G63030	0.0077483	1.52512e-10
AT2G25410	-0.0822084	3.06151e-08		AT1G20450	0.00992904	1.52926e-05		AT5G52030	-0.0349872	2.26215e-05		AT1G28660	-0.00833042	0.000144366		AT3G09390	0.00915662	1.63336e-10
AT2G43510	0.0586674	3.06877e-08		AT1G34510	0.0330489	1.5362e-05		AT1G67650	0.0386535	2.34787e-05		AT2G43480	-0.00444962	0.000145979		AT4G24160	-0.00352012	1.63957e-10
AT4G29700	0.0219194	3.15301e-08		AT2G29440	0.0121859	1.56055e-05		AT3G45330	-0.055129	2.3622e-05		AT1G20340	0.00942636	0.00014854		AT1G06430	0.00687946	1.64323e-10
AT1G32100	0.0184195	3.20372e-08		AT3G08040	0.0192863	1.56055e-05		AT2G39420	-0.027123	2.38563e-05		AT5G23120	0.00521839	0.000148891		AT1G13280	0.00404323	1.76702e-10
AT3G10720	-0.0266814	3.26847e-08		AT5G02260	0.0130032	1.56055e-05		AT4G15500	-0.0329411	2.38563e-05		AT1G63410	0.00457615	0.000151775		AT3G53540	0.00427436	1.77735e-10
AT1G55990	0.0251243	3.32186e-08		AT4G22740	0.0098681	1.56473e-05		AT4G21800	0.0219253	2.38563e-05		AT3G52060	-0.00254914	0.000155591		AT2G37660	0.00682322	1.86853e-10
AT2G43000	0.0508862	3.36604e-08		AT1G32870	0.01251	1.6291e-05		AT5G13240	-0.0245188	2.56541e-05		AT1G21140	0.00640882	0.00015574		AT1G54575	0.00799674	1.98976e-10
AT2G38960	-0.0212546	3.39589e-08		AT2G21250	0.00706973	1.63766e-05		AT1G47128	-0.0167841	2.69526e-05		AT3G62570	-0.00451235	0.000162113		AT2G28250	-0.00536541	2.02106e-10
AT4G31550	-0.0249027	3.49882e-08		AT1G07040	0.00927586	1.66416e-05		AT1G36180	0.0519366	2.71117e-05		AT4G04460	-0.00754664	0.000162113		AT3G09300	-0.00461922	2.02954e-10
AT5G20280	0.0212037	3.50665e-08		AT3G48990	0.0116864	1.81678e-05		AT1G20140	0.0344865	2.71208e-05		AT4G29180	-0.00620766	0.000165435		AT4G04020	0.00685541	2.06699e-10
AT3G22060	0.0384414	3.5309e-08		AT4G30810	0.00729263	2.0007e-05		AT1G56500	0.031329	2.71208e-05		AT2G19900	0.00570267	0.000165839		AT4G37970	0.0111572	2.16466e-10
AT4G37690	0.058511	3.57777e-08		AT5G15410	0.0112646	2.00302e-05		AT2G26290	-0.0256185	2.73168e-05		AT5G05500	-0.00566077	0.000165839		AT5G06730	0.00846324	2.24724e-10
AT1G24130	0.0548999	3.71858e-08		AT1G18100	0.0241741	2.02697e-05		AT1G01340	-0.026996	2.95631e-05		AT5G13930	0.00716478	0.000165839		AT4G17550	0.00682994	2.27909e-10
AT1G44020	-0.0470977	3.71858e-08		AT3G26740	-0.0289972	2.10626e-05		AT5G19240	-0.0415259	3.01477e-05		AT1G79040	0.00465608	0.000166539		AT4G25130	0.00459415	2.42235e-10
AT3G51350	-0.0313608	3.71858e-08		AT5G38530	0.00904533	2.10626e-05		AT2G40370	-0.0229216	3.07832e-05		AT3G60330	-0.00720988	0.000166539		AT3G29090	0.00593573	2.48405e-10
AT4G14630	-0.0260819	3.71858e-08		AT1G79380	-0.00774377	2.12363e-05		AT3G13760	-0.0408603	3.07832e-05		AT5G03560	0.00371069	0.000166539		AT4G14130	-0.00788847	2.48405e-10
AT3G62010	0.020888	3.77658e-08		AT3G51150	0.0163896	2.12363e-05		AT1G21440	-0.0219316	3.1381e-05		AT1G68560	-0.0025376	0.000166899		AT4G30550	0.00428972	2.61421e-10
AT5G47040	0.0155496	3.87031e-08		AT4G28250	-0.0144596	2.1827e-05		AT2G39800	0.0267896	3.1703e-05		AT2G30570	0.00917549	0.000169334		AT1G53790	0.00644673	2.86892e-10
AT4G15370	-0.0413599	3.91516e-08		AT5G02090	-0.0126541	2.18287e-05		AT4G21620	0.0448489	3.24394e-05		AT5G06265	0.00504878	0.000172601		AT4G36220	0.00881461	2.86892e-10
AT5G57530	0.0328524	3.98125e-08		AT4G20390	-0.0137594	2.23726e-05		AT4G04450	-0.0535624	3.2603e-05		AT5G64410	-0.00386228	0.000172601		AT2G26355	0.0111711	2.87228e-10
AT2G30670	-0.0883236	4.21128e-08		AT4G03110	-0.00962725	2.26374e-05		AT3G25700	0.0291897	3.26286e-05		AT3G03680	-0.00373348	0.000175743		AT5G62150	0.00913985	3.39695e-10
AT2G36580	-0.0208551	4.23305e-08		AT2G24700	-0.0202731	2.28508e-05		AT3G43720	0.0414794	3.27771e-05		AT3G59530	0.0058024	0.000175743		AT4G38460	0.00684836	3.49502e-10
AT5G53120	0.0140101	4.54437e-08		AT3G21500	0.0425703	2.28508e-05		AT1G24130	-0.0715341	3.27808e-05		AT3G60690	0.00419631	0.000176534		AT5G19890	0.0168308	3.54223e-10
AT1G01470	0.0304446	4.65534e-08		AT5G64080	0.0133981	2.40632e-05		AT5G05600	-0.0329753	3.3387e-05		AT5G52310	0.00865794	0.000177351		AT3G48690	0.00658344	3.68399e-10
AT5G37990	0.0387515	4.6834e-08		AT5G49665	0.00961	2.52103e-05		AT5G43540	0.0468465	3.39865e-05		AT3G57040	0.00452902	0.000177868		AT4G11350	0.00699328	3.94027e-10
AT5G19110	0.0325907	4.70602e-08		AT3G22060	0.0126547	2.55374e-05		AT3G59710	-0.0766664	3.41181e-05		AT3G15540	-0.00841537	0.000184216		AT5G37790	-0.00539231	4.1584e-10
AT3G60130	0.0199528	4.76145e-08		AT1G14160	-0.0213673	2.61313e-05		AT1G58440	-0.0194176	3.44749e-05		AT5G52120	-0.00504968	0.000185097		AT3G43960	-0.0085565	4.29941e-10
AT2G38010	0.0216876	5.06245e-08		AT5G04150	-0.0364095	2.67408e-05		AT3G21670	-0.0621658	3.5118e-05		AT5G62140	0.00685275	0.000185167		AT5G20230	0.0186265	4.50073e-10
AT1G72540	-0.0591905	5.29458e-08		AT1G71870	-0.0103049	2.6831e-05		AT2G44290	-0.0874165	3.52892e-05		AT5G65790	0.00369341	0.000185453		AT5G60660	-0.00865758	4.58276e-10
AT2G41560	-0.0205914	5.29458e-08		AT2G01660	-0.011931	2.71914e-05		AT5G05410	-0.0463046	3.56716e-05		AT5G41730	-0.0141186	0.000186808		AT2G46820	0.0064646	4.88769e-10
AT5G52120	0.0304819	5.29458e-08		AT1G55380	-0.0224588	2.72982e-05		AT2G28470	-0.0287817	3.57049e-05		AT1G70880	-0.00403526	0.000187552		AT1G60730	0.00857749	4.96075e-10
AT5G24080	0.0757736	5.4301e-08		AT1G13480	-0.0198421	2.75066e-05		AT3G25770	-0.0671184	3.57049e-05		AT1G79840	-0.00480337	0.000187856		AT3G44100	0.0063261	4.98637e-10
AT4G25110	-0.0500284	5.66214e-08		AT4G14130	-0.0206184	2.7881e-05		AT3G14050	-0.0282216	3.63881e-05		AT1G06430	0.00487241	0.000190443		AT4G31340	-0.00253924	5.1814e-10
AT1G68150	-0.0263853	6.12998e-08		AT1G60960	0.0133515	2.84461e-05		AT1G06930	-0.0516166	3.6674e-05		AT1G50970	0.00347697	0.000191705		AT5G49630	-0.00834782	5.1814e-10
AT5G59480	0.0307933	6.12998e-08		AT3G16420	0.00736113	2.88444e-05		AT1G01630	0.017059	3.75155e-05		AT3G09300	-0.00296882	0.000191705		AT3G19960	0.00628428	5.77604e-10
AT1G56680	-0.0265301	6.19507e-08		AT3G20100	0.0129853	2.91169e-05		AT5G40690	-0.0356485	3.75252e-05		AT2G43550	-0.00447166	0.000194614		AT2G29650	0.00524509	5.84385e-10
AT1G08890	0.0181189	6.19924e-08		AT1G67870	-0.0140463	2.91576e-05		AT5G36260	-0.0599231	3.80262e-05		AT3G23740	-0.00483555	0.000196433		AT1G73480	0.00522776	5.90424e-10
AT3G53260	-0.0231249	6.19924e-08		AT1G21120	0.0280651	3.10752e-05		AT3G13450	-0.0312213	3.89119e-05		AT3G45210	0.00335224	0.000198126		AT2G31790	-0.0082518	6.01059e-10
AT5G66780	0.0750644	7.34044e-08		AT1G10200	-0.00662663	3.1903e-05		AT5G57660	-0.0215828	3.89119e-05		AT1G62800	-0.00327603	0.000206673		AT4G01120	-0.00483179	6.37625e-10
AT5G07580	-0.0281863	7.84713e-08		AT4G05390	0.00902286	3.19171e-05		AT5G62210	-0.0646696	3.89119e-05		AT2G38310	-0.0051861	0.000207611		AT5G38100	0.0122464	6.46339e-10
AT5G22555	-0.0748804	7.9497e-08		AT2G26360	-0.012453	3.27737e-05		AT2G27060	-0.0260942	3.91088e-05		AT2G42620	0.00339567	0.000209017		AT5G01820	0.00561711	6.613e-10
AT3G23920	0.0212613	8.4129e-08		AT2G34610	0.0161606	3.27737e-05		AT2G18193	0.0574177	3.92143e-05		AT1G48930	-0.00630479	0.000210739		AT2G28900	0.00784457	6.98559e-10
AT1G55740	0.0152269	8.47653e-08		AT4G37610	-0.0289159	3.30451e-05		AT3G26720	-0.0326133	4.00007e-05		AT5G61420	-0.00684488	0.000216435		AT5G16590	-0.00544338	7.23744e-10
AT4G10550	-0.0405509	8.60502e-08		AT1G52690	0.053257	3.33206e-05		AT2G43510	0.0382767	4.00121e-05		AT3G18500	0.0048023	0.000221603		AT2G16980	-0.0105019	7.41497e-10
AT5G01550	0.0404992	8.60502e-08		AT5G35735	0.00873941	3.37043e-05		AT4G11290	0.0286017	4.00121e-05		AT4G10510	0.00454712	0.000221603		AT1G14340	0.0049908	7.5016e-10
AT3G55700	-0.0377472	8.82179e-08		AT5G66670	0.0185916	3.46237e-05		AT4G36648	0.0192172	4.00565e-05		AT4G11470	0.00748099	0.000222192		AT4G37300	0.00706822	7.65157e-10
AT4G33150	0.0219793	1.01277e-07		AT1G14185	-0.0151138	3.46335e-05		AT4G37970	0.0370775	4.04058e-05		AT5G60850	0.00523956	0.000223539		AT1G60680	0.00609327	7.95476e-10
AT1G58440	0.0174314	1.02143e-07		AT5G62720	-0.0137284	3.46335e-05		AT5G01700	-0.0350661	4.04058e-05		AT5G65690	0.00667322	0.000223773		AT2G26690	0.00745504	8.05328e-10
AT1G22640	0.0265768	1.02511e-07		AT1G23190	0.010503	3.46711e-05		AT5G58360	-0.105177	4.04058e-05		AT4G29190	0.00419759	0.000224233		AT1G26930	0.00518102	8.06013e-10
AT1G04220	0.0393755	1.04677e-07		AT3G49120	0.0109207	3.49189e-05		AT3G50240	0.0234979	4.18371e-05		AT1G33110	0.00335324	0.000225758		AT1G73810	0.00732946	8.12183e-10
AT4G22230	0.0335602	1.0995e-07		AT1G32450	-0.0149383	3.49328e-05		AT3G48090	-0.0317294	4.19164e-05		AT1G76240	-0.00391351	0.000225758		AT4G33540	0.00501555	8.24348e-10
AT3G44540	0.0188762	1.10568e-07		AT1G57980	-0.025263	3.52395e-05		AT5G17220	0.086986	4.43083e-05		AT2G43510	0.00818621	0.000226047		AT2G36835	0.00691324	8.49457e-10
AT3G26460	0.0327267	1.11701e-07		AT3G09950	0.0245626	3.52395e-05		AT1G54010	0.0185275	4.44497e-05		AT1G15440	-0.00250335	0.000232536		AT4G11320	-0.00652647	8.72791e-10
AT3G51750	0.0527477	1.12512e-07		AT3G23470	0.010602	3.52395e-05		AT2G28720	-0.034441	4.44497e-05		AT5G06270	0.00292836	0.000238365		AT5G25120	0.00884778	9.61629e-10
AT1G21920	0.0174028	1.14432e-07		AT1G76890	-0.0110345	3.5634e-05		AT3G25900	0.0246313	4.5331e-05		AT5G59780	0.00486221	0.000238805		AT4G11650	0.00841765	1.00246e-09
AT2G17050	-0.0391251	1.14951e-07		AT5G15950	0.00962416	3.5634e-05		AT1G08640	0.0216411	4.55954e-05		AT3G55720	-0.00604178	0.000247709		AT1G55360	-0.00357546	1.01266e-09
AT5G63450	0.0477289	1.15352e-07		AT4G22690	-0.0182069	3.6168e-05		AT1G80920	-0.0435294	4.55954e-05		AT4G15233	-0.00712829	0.00024787		AT1G14185	-0.00912122	1.04505e-09
AT5G09480	0.0181031	1.15938e-07		AT1G51850	-0.0126088	3.61955e-05		AT1G54740	-0.041976	4.60543e-05		AT4G33710	0.0180539	0.00024787		AT1G52120	0.0193765	1.04505e-09
AT1G11300	0.037448	1.1958e-07		AT4G14030	0.00890652	3.68043e-05		AT3G05190	0.0271704	4.63684e-05		AT5G10625	0.00542567	0.000250298		AT3G45210	0.00679338	1.08004e-09
AT5G49870	-0.0474128	1.20455e-07		AT1G30700	0.0139265	3.83993e-05		AT1G64910	-0.0716724	4.68908e-05		AT1G78860	-0.00559745	0.000250504		AT5G61430	0.0056714	1.09432e-09
AT1G62290	0.051276	1.23314e-07		AT4G12430	0.0215501	3.84277e-05		AT3G14440	-0.0644968	4.75249e-05		AT1G07610	0.00557791	0.000256055		AT4G37470	0.00522759	1.11001e-09
AT4G12360	-0.0652139	1.23779e-07		AT5G42500	-0.0207189	3.90845e-05		AT1G52790	-0.0639735	4.76517e-05		AT1G76800	0.0053998	0.000257016		AT1G35190	0.00377216	1.13789e-09
AT5G42930	0.0438728	1.25171e-07		AT1G69890	-0.0164285	3.91698e-05		AT5G27610	0.0347532	4.77922e-05		AT5G54770	0.00503152	0.000261238		AT2G30550	0.00683821	1.15745e-09
AT2G18160	-0.0159908	1.28688e-07		AT1G25230	-0.0161212	4.08418e-05		AT4G16990	-0.0913346	4.82393e-05		AT3G52820	-0.00852449	0.000262147		AT1G07700	0.00700315	1.24196e-09
AT3G12900	-0.0436706	1.31934e-07		AT1G09750	-0.0178817	4.33034e-05		AT2G33710	0.0254787	4.86248e-05		AT2G44830	-0.00377046	0.000262628		AT2G34460	0.00827004	1.26526e-09
AT3G02020	-0.0194445	1.394e-07		AT2G31800	-0.00849743	4.45843e-05		AT1G14120	-0.0342004	4.99673e-05		AT5G50100	0.00475187	0.000262628		AT1G17830	0.00803856	1.29421e-09
AT1G05880	-0.0376417	1.41558e-07		AT3G01290	-0.0172258	4.45843e-05		AT3G45780	-0.0340426	5.00578e-05		AT1G63240	0.00428653	0.000266646		AT4G04955	-0.00705851	1.33105e-09
AT3G51330	-0.0269354	1.41558e-07		AT1G06930	-0.0207856	4.48237e-05		AT3G20470	0.0522909	5.06859e-05		AT4G33330	-0.00437458	0.000275848		AT3G17130	0.014065	1.3405e-09
AT3G02480	0.0686001	1.45607e-07		AT2G28720	-0.0097839	4.51271e-05		AT5G61440	-0.0478977	5.06859e-05		AT5G09440	-0.00543841	0.000275848		AT5G60120	0.00502511	1.35847e-09
AT5G57540	0.0351348	1.48705e-07		AT2G32090	0.00937308	4.51271e-05		AT1G28400	-0.0136363	5.09951e-05		AT1G58370	-0.00752222	0.000276797		AT3G50820	0.0120111	1.43449e-09
AT3G22800	-0.0322373	1.51124e-07		AT2G46270	0.00890409	4.51271e-05		AT1G24735	0.0343507	5.26489e-05		AT5G04370	0.0037318	0.000289556		AT1G70460	-0.00808712	1.47424e-09
AT3G45010	0.0186745	1.53852e-07		AT1G37130	0.0139158	4.52714e-05		AT4G01985	0.137156	5.36454e-05		AT2G33020	0.00857304	0.000291378		AT1G68590	0.010837	1.53618e-09
AT1G05010	0.0241727	1.59382e-07		AT1G72830	0.00932596	4.61249e-05		AT5G47210	0.0122783	5.36863e-05		AT1G51110	0.00760604	0.000292965		AT1G72680	0.00483627	1.53618e-09
AT2G28690	-0.0347832	1.63466e-07		AT1G12050	0.0067759	4.70313e-05		AT1G33750	0.0225453	5.37777e-05		AT5G60440	0.00860954	0.000292965		AT1G06460	0.00886794	1.60852e-09
AT1G13480	-0.0393512	1.7573e-07		AT1G07610	0.0153265	4.73429e-05		AT5G58610	0.0607875	5.37777e-05		AT2G37130	-0.00631408	0.000300255		AT2G22330	-0.00832513	1.68546e-09
AT1G77530	0.0189678	1.76532e-07		AT3G29410	-0.0142306	5.02725e-05		AT4G33360	0.0155393	5.41239e-05		AT4G29930	0.00560159	0.000301065		AT5G53250	-0.00948485	1.7193e-09
AT3G46170	0.0429522	1.76532e-07		AT4G30290	0.0122209	5.02725e-05		AT5G47880	0.020316	5.60102e-05		AT1G54575	0.00640996	0.000303325		AT5G65600	-0.0157313	1.72542e-09
AT3G62210	-0.0353645	1.81695e-07		AT2G18196	-0.0162765	5.05987e-05		AT1G07620	-0.0405112	5.67027e-05		AT1G69480	0.0047742	0.000303679		AT1G30420	-0.00552345	1.76633e-09
AT1G33910	-0.0844386	1.84717e-07		AT3G52180	0.0105486	5.10923e-05		AT1G16510	0.0619749	5.67027e-05		AT3G01820	0.00371698	0.000305408		AT3G23490	0.00482956	1.7893e-09
AT2G41475	0.0190077	1.86718e-07		AT2G05520	0.0317794	5.15806e-05		AT3G06740	0.0310813	5.67027e-05		AT4G34650	0.00771257	0.000306885		AT1G22430	0.00657688	1.79737e-09
AT2G26690	0.0334716	1.88556e-07		AT1G72510	-0.0104248	5.17155e-05		AT1G58030	-0.0265894	5.6773e-05		AT4G22230	-0.00481086	0.000310732		AT3G56370	-0.00725077	1.81571e-09
AT5G62530	0.0174035	1.92162e-07		AT4G25560	-0.0167744	5.36718e-05		AT1G62560	-0.0434958	5.77744e-05		AT5G04080	0.00399583	0.000314151		AT1G75640	-0.0072717	1.82397e-09
AT5G41300	-0.0433057	1.97286e-07		AT2G40100	0.0220652	5.42144e-05		AT1G76680	-0.0223405	5.78842e-05		AT3G28180	-0.00418819	0.000316988		AT5G41800	0.00741761	1.85183e-09
AT3G05165	0.0200272	2.12966e-07		AT1G04990	0.00917818	5.42391e-05		AT3G12220	-0.0814374	5.78842e-05		AT5G16990	0.00377515	0.000317826		AT2G05510	0.014065	1.85216e-09
AT3G45970	0.0273743	2.12966e-07		AT1G72900	0.0174306	5.61136e-05		AT5G13580	-0.0357627	5.80744e-05		AT5G44635	-0.00445167	0.000324104		AT3G27820	0.00493743	1.86137e-09
AT1G67100	-0.0957554	2.37913e-07		AT2G47780	0.0526108	5.83831e-05		AT5G52790	-0.0486486	5.92851e-05		AT3G04070	0.00444843	0.00032671		AT5G57010	-0.00600076	1.87238e-09
AT1G63600	0.0375586	2.41082e-07		AT1G74090	-0.0138078	5.91769e-05		AT1G02810	-0.0298506	5.94417e-05		AT2G28305	0.00628828	0.000329695		AT1G14960	-0.0132152	1.90955e-09
AT5G19700	-0.0447211	2.41438e-07		AT1G29020	-0.042008	5.96006e-05		AT1G22430	-0.0423351	5.9865e-05		AT3G26650	0.00804965	0.000341865		AT5G02240	0.00657492	1.92698e-09
AT4G23820	-0.0295415	2.43345e-07		AT3G16450	0.0111136	5.9653e-05		AT5G07460	-0.0299296	6.01771e-05		AT1G30870	-0.00601774	0.000345989		AT2G37110	0.00450294	1.93201e-09
AT4G19690	-0.023237	2.4594e-07		AT5G15725	-0.0250456	5.99032e-05		AT4G11210	-0.0468242	6.02487e-05		AT5G48590	0.00396235	0.000347746		AT2G32520	0.00507735	2.05756e-09
AT3G44870	0.0654675	2.46603e-07		AT3G09600	0.0130413	6.20835e-05		AT3G13920	0.0141404	6.03497e-05		AT2G43375	0.00691433	0.000349474		AT1G63880	0.00926219	2.19139e-09
AT1G63940	-0.015565	2.47389e-07		AT3G29780	-0.0213151	6.22221e-05		AT2G01120	0.0225403	6.15569e-05		AT1G26970	-0.00439651	0.00035621		AT3G58550	0.00735901	2.20289e-09
AT2G02680	-0.0347546	2.47866e-07		AT3G53190	-0.0113062	6.22426e-05		AT5G43520	-0.0427738	6.29121e-05		AT1G70920	0.00552399	0.00035621		AT3G46440	0.00330171	2.28245e-09
AT1G17147	0.0440328	2.48755e-07		AT2G33770	-0.00912228	6.27912e-05		AT4G31330	-0.068516	6.35763e-05		AT5G16590	-0.00366444	0.000356906		AT1G11210	0.0109534	2.29254e-09
AT1G02305	0.0143239	2.61943e-07		AT3G50010	-0.01752	6.43591e-05		AT3G05155	-0.0410617	6.50843e-05		AT5G19730	0.00351425	0.00035894		AT3G09950	0.0162989	2.29971e-09
AT1G13080	0.0277229	2.66004e-07		AT4G26700	0.0129941	6.44538e-05		AT3G55890	-0.0371966	6.5258e-05		AT1G20720	-0.0038862	0.000359185		AT2G47160	0.00738115	2.32238e-09
AT5G24140	0.062929	2.66004e-07		AT5G62340	-0.0195197	6.46018e-05		AT3G47220	-0.0249612	6.552e-05		AT1G70460	-0.0049842	0.000371121		AT1G79040	0.00877798	2.46532e-09
AT5G13580	0.0260195	2.67164e-07		AT1G71400	-0.0152845	6.66599e-05		AT1G30070	0.0227551	6.63574e-05		AT2G47800	-0.00442251	0.000371389		AT1G31710	-0.00603393	2.48704e-09
AT1G79320	0.0267124	2.91297e-07		AT1G10970	0.0142048	6.69791e-05		AT1G65680	0.049976	6.67529e-05		AT4G14020	0.00580332	0.000376109		AT1G56190	0.00454308	2.51622e-09
AT4G22610	0.0353534	2.94498e-07		AT3G12580	0.0184684	7.09921e-05		AT2G39890	-0.0195768	6.76205e-05		AT5G55050	-0.00504642	0.000376109		AT2G39890	-0.00455059	2.51622e-09
AT5G64410	0.0225619	2.96704e-07		AT5G24090	0.00984132	7.1119e-05		AT5G18065	0.0430873	6.76213e-05		AT2G41480	0.00545567	0.000376526		AT4G37030	-0.00906488	2.57233e-09
AT5G62720	-0.0354947	3.07108e-07		AT5G55110	0.0250519	7.13513e-05		AT3G45300	-0.0283777	6.8212e-05		AT2G01520	-0.00353017	0.000381302		AT3G15360	0.00766189	2.75281e-09
AT2G23790	0.0174888	3.08348e-07		AT4G34930	-0.0246048	7.17467e-05		AT5G06190	0.0645502	7.0752e-05		AT3G55120	0.00953788	0.000381456		AT1G07230	0.00481621	2.75542e-09
AT3G05936	0.0407942	3.08348e-07		AT1G72500	-0.00894528	7.17573e-05		AT1G65030	0.0183813	7.10242e-05		AT1G11175	0.00684578	0.000385711		AT2G02820	-0.00836149	2.75542e-09
AT1G31230	-0.0159495	3.10834e-07		AT2G38010	0.0111763	7.23582e-05		AT1G73680	-0.0308101	7.14744e-05		AT4G35250	0.00378425	0.000385711		AT1G69260	0.00645127	2.89536e-09
AT2G29500	0.0291442	3.13755e-07		AT3G58550	0.0113136	7.41145e-05		AT4G15380	-0.0389175	7.25593e-05		AT3G50820	0.00749186	0.000385898		AT3G05937	0.00698161	2.99226e-09
AT5G14520	-0.0136373	3.16064e-07		AT5G45920	0.0136343	7.46309e-05		AT5G08180	0.0189142	7.35445e-05		AT3G01730	-0.0150649	0.000389624		AT1G31940	0.00642849	3.00623e-09
AT2G20670	0.0243657	3.21607e-07		AT4G15430	-0.0104775	7.47428e-05		AT2G38270	0.0306714	7.50573e-05		AT2G40550	-0.00314443	0.000391762		AT3G48520	0.0141069	3.00623e-09
AT5G40390	0.0193777	3.21622e-07		AT5G16990	0.0127023	7.47428e-05		AT1G01790	-0.020475	7.55875e-05		AT4G03110	-0.00343723	0.000394939		AT3G47860	0.00818858	3.01243e-09
AT2G47540	0.0229476	3.21716e-07		AT2G01950	-0.0112018	7.56446e-05		AT3G14810	-0.0323963	7.64749e-05		AT4G01120	0.00206582	0.000397661		AT3G12720	0.00736593	3.17715e-09
AT3G23170	-0.0566668	3.28979e-07		AT3G16190	0.00929703	7.63134e-05		AT1G68560	-0.0205351	7.67467e-05		AT3G23670	-0.00468138	0.000399857		AT1G12845	0.0121987	3.21388e-09
AT2G02620	-0.0751914	3.39255e-07		AT2G26560	0.0212837	7.89648e-05		AT2G41800	0.0243845	7.89037e-05		AT5G11330	0.00290464	0.000402321		AT5G17450	-0.0131724	3.32711e-09
AT1G69040	-0.0265009	3.50058e-07		AT1G23000	-0.0148978	7.95828e-05		AT5G05250	-0.0465563	7.95112e-05		AT3G19200	0.0053442	0.000402729		AT5G09220	-0.00443499	3.56263e-09
AT3G10740	0.0196431	3.55382e-07		AT5G61250	-0.0100531	8.11961e-05		AT1G43670	-0.0297995	8.28462e-05		AT5G53590	0.00303401	0.000403612		AT3G44880	0.00752193	3.64053e-09
AT4G34131	0.0316388	3.60007e-07		AT2G28890	0.00576493	8.12595e-05		AT2G34490	-0.0329443	8.42252e-05		AT1G22710	0.00453955	0.000408469		AT2G38390	0.00779811	3.72919e-09
AT4G13300	-0.0470175	3.60116e-07		AT5G57800	0.0120214	8.12595e-05		AT3G45410	-0.0332097	8.42252e-05		AT1G73600	-0.00528209	0.000417677		AT2G24580	-0.00632668	3.81817e-09
AT1G01720	0.0291382	3.64303e-07		AT2G05160	-0.0192101	8.17173e-05		AT4G08620	-0.0779318	8.42252e-05		AT5G14580	-0.00435013	0.000419455		AT3G43270	0.00558611	3.89958e-09
AT4G33610	0.0233501	3.82751e-07		AT1G29670	0.0230054	8.59425e-05		AT3G19430	-0.0753362	8.42401e-05		AT1G27460	-0.00381808	0.000432295		AT2G05620	0.00892121	4.0377e-09
AT5G23190	0.0227591	3.96166e-07		AT5G37450	-0.0436927	8.63262e-05		AT3G45290	-0.0906594	8.49777e-05		AT5G26080	-0.0204921	0.000437641		AT3G57040	0.00526517	4.0377e-09
AT5G15130	-0.0243977	3.97409e-07		AT1G68840	-0.0110898	8.7219e-05		AT3G50840	-0.0394844	8.49777e-05		AT5G04330	-0.00557012	0.000438498		AT5G15070	-0.00456963	4.07718e-09
AT2G14510	-0.0307858	4.03056e-07		AT1G62440	0.0147713	8.818e-05		AT5G44390	-0.0371351	8.94618e-05		AT3G60280	-0.00867171	0.00044116		AT4G27260	-0.0085878	4.21541e-09
AT2G18050	0.0448194	4.03056e-07		AT1G19330	-0.0106355	8.82423e-05		AT2G29330	0.0256474	9.20618e-05		AT1G07700	0.00417164	0.000442605		AT4G15910	0.00967187	4.42426e-09
AT4G13310	-0.0351647	4.03056e-07		AT5G06900	-0.0147481	9.04122e-05		AT5G44410	-0.0473223	9.44667e-05		AT1G30530	0.00633284	0.000447108		AT5G21090	0.00388791	4.50587e-09
AT3G16460	0.0168421	4.11729e-07		AT5G50200	-0.0148907	9.23378e-05		AT3G18080	-0.0336192	9.46401e-05		AT5G04200	-0.00629654	0.000447933		AT4G10310	0.0247829	4.66153e-09
AT4G23190	0.0267202	4.11729e-07		AT1G12845	0.0243068	9.29118e-05		AT5G60580	-0.0269049	9.46401e-05		AT3G23730	-0.00755927	0.000449387		AT5G23020	-0.00583617	4.80101e-09
AT3G50300	0.0184219	4.25703e-07		AT5G05390	0.0217081	9.3451e-05		AT2G28990	-0.0596001	9.53706e-05		AT5G19780	-0.00327531	0.0004519		AT2G35370	0.0110222	4.96043e-09
AT1G13700	0.0274663	4.3078e-07		AT3G61890	0.0114305	9.3796e-05		AT1G74090	-0.0244126	9.67755e-05		AT1G56200	0.00468415	0.000454479		AT1G03310	0.00557765	4.99252e-09
AT1G60190	0.0399777	4.36284e-07		AT5G18840	0.0136533	9.65492e-05		AT1G03770	0.0285427	9.78671e-05		AT5G24313	-0.0126695	0.000454479		AT5G65870	0.0104046	5.12268e-09
AT5G07760	-0.0556331	4.51853e-07		AT3G02360	0.00524473	9.90967e-05		AT2G18700	-0.0574687	9.8116e-05		AT2G40530	0.00534012	0.000464992		AT1G23200	0.00919319	5.28308e-09
AT1G15500	-0.015104	4.62771e-07		AT5G39850	0.0130172	9.90967e-05		AT3G26610	-0.0502632	9.8116e-05		AT3G26690	0.0034715	0.000468543		AT3G03670	-0.0421586	5.56532e-09
AT1G26420	0.0390176	4.74368e-07		AT1G30760	0.0103809	0.000100578		AT1G08765	0.0654753	9.84743e-05		AT1G66270	-0.00286484	0.000477438		AT2G45740	0.00967737	5.58362e-09
AT4G21650	0.0305749	4.85989e-07		AT1G51200	-0.00613878	0.000101039		AT4G19660	-0.0298428	9.84743e-05		AT5G15070	-0.00360389	0.000477438		AT5G58700	0.00510969	5.58362e-09
AT5G47910	-0.0279383	5.06109e-07		AT5G52310	0.0338864	0.000101039		AT4G20860	-0.028456	9.87294e-05		AT3G53510	-0.00277208	0.000480737		AT4G39780	0.00585103	5.63398e-09
AT2G26400	-0.0586405	5.19543e-07		AT2G18600	0.0161267	0.000102052		AT5G60900	-0.0882505	9.87476e-05		AT1G02570	-0.0114251	0.000481657		AT2G23150	0.0109577	5.90539e-09
AT5G51750	-0.0396974	5.32518e-07		AT4G35900	-0.0186643	0.0001037		AT2G38800	-0.0252643	9.99482e-05		AT3G50685	0.00544087	0.000481657		AT2G33550	0.0052107	5.96211e-09
AT3G20940	0.0241961	5.33406e-07		AT3G62210	-0.0297364	0.000105244		AT3G50910	0.018354	0.000100357		AT3G54260	0.0041552	0.000482282		AT5G40690	-0.00763547	6.28909e-09
AT3G20300	0.0352771	5.4893e-07		AT5G66400	0.0419242	0.000107766		AT4G15765	-0.0553501	0.000100357		AT4G09010	0.00756286	0.000487277		AT1G03840	-0.00767567	6.60236e-09
AT1G04990	0.0219994	5.67839e-07		AT4G34230	0.0094884	0.000108129		AT4G36920	-0.0130208	0.000100357		AT3G25570	0.00543971	0.000487311		AT1G76240	-0.00429888	6.65726e-09
AT1G72140	0.0241787	5.77906e-07		AT1G32700	-0.0105789	0.000109353		AT3G47620	-0.0339893	0.000102768		AT4G01050	0.00334415	0.000487311		AT5G14920	0.0105898	7.11416e-09
AT1G65510	0.0274914	5.80551e-07		AT4G38830	-0.0197535	0.000110078		AT5G66815	0.0490996	0.000103221		AT2G18570	0.00279716	0.000489637		AT1G70580	0.00548938	7.56847e-09
AT2G36380	0.0218637	5.90076e-07		AT4G19660	-0.0089704	0.000110557		AT5G36140	-0.0495124	0.000103742		AT5G13740	0.00335924	0.00049058		AT3G19430	0.0184781	7.63732e-09
AT3G00210	-0.0403902	5.90076e-07		AT1G72680	0.0126959	0.000112598		AT1G24267	0.0217127	0.00010377		AT3G28950	0.00452803	0.000509514		AT2G46860	-0.0112546	7.66487e-09
AT1G33090	0.0414511	5.95031e-07		AT3G60470	-0.0559936	0.000112598		AT1G79310	-0.0351481	0.00010377		AT1G01060	0.00593596	0.000509556		AT5G25620	-0.00833683	7.99041e-09
AT5G36130	0.0766171	6.02707e-07		AT2G25690	0.0119301	0.000113064		AT3G50610	0.0776595	0.000104053		AT1G19400	0.00317444	0.000509556		AT3G62760	-0.0132805	7.99093e-09
AT4G20000	0.0308748	6.08159e-07		AT4G33110	0.0182669	0.00011369		AT1G76720	-0.0771532	0.000105379		AT3G44735	0.00506417	0.000509556		AT2G25590	-0.00458274	8.19744e-09
AT5G65110	0.0156304	6.08159e-07		AT4G00480	-0.0144602	0.000114295		AT1G76020	-0.0320871	0.000105837		AT4G12000	0.00515006	0.000509556		AT3G30260	-0.0191556	8.28387e-09
AT1G20440	0.0207321	6.08733e-07		AT2G16980	-0.019191	0.000118112		AT3G60490	-0.0542781	0.000105837		AT3G49220	0.00342241	0.000517754		AT3G62700	0.00583305	8.9107e-09
AT1G33880	-0.0737421	6.10466e-07		AT2G26710	-0.0129996	0.000118191		AT1G60140	-0.0311694	0.000105978		AT1G74453	0.00822612	0.000526656		AT1G78020	-0.00760326	9.09305e-09
AT1G10990	-0.0348231	6.12442e-07		AT2G35150	-0.0146351	0.000120877		AT5G53580	-0.0301213	0.00011449		AT3G48115	0.00546188	0.000529674		AT4G04700	-0.0114893	9.1302e-09
AT1G76490	0.0180305	6.23307e-07		AT2G23630	0.0120689	0.00012189		AT1G16110	-0.0463875	0.000116104		AT4G38932	0.00612112	0.000529674		AT4G39350	-0.00426525	9.1302e-09
AT1G17290	-0.0240726	6.25151e-07		AT4G20460	-0.00994072	0.000128602		AT4G31100	-0.0198246	0.000117593		AT1G78090	-0.00388461	0.000532309		AT1G04990	0.00491505	9.30019e-09
AT4G32840	-0.0221304	6.34686e-07		AT3G29770	-0.00998248	0.000130372		AT1G52050	-0.0454219	0.000118466		AT1G55240	-0.0053234	0.000535018		AT1G03340	0.0105502	9.48553e-09
AT1G10900	0.0148265	6.91653e-07		AT1G22330	-0.0161911	0.000133019		AT1G73300	-0.0609436	0.000121077		AT1G66440	-0.00891388	0.000542318		AT4G35100	-0.00408542	9.55835e-09
AT5G28630	-0.0488186	6.94439e-07		AT1G51500	0.0119883	0.000133839		AT5G56320	0.0221182	0.00012478		AT1G77090	0.00823424	0.000542318		AT1G14350	-0.00634299	9.70169e-09
AT3G11930	-0.0364498	7.22967e-07		AT3G52880	0.0075186	0.000133839		AT2G27510	0.0270437	0.000126009		AT3G17380	-0.00555099	0.000542318		AT5G17160	-0.00471154	9.70169e-09
AT2G45750	0.0232451	7.35259e-07		AT1G69295	0.00958045	0.000133951		AT4G25090	-0.0447025	0.000127528		AT4G32200	-0.00464432	0.000542318		AT1G50460	-0.00575342	9.75712e-09
AT2G40110	0.0291442	7.41623e-07		AT1G53470	0.0187024	0.000135031		AT4G11880	-0.0211309	0.000129324		AT5G06900	-0.00492897	0.000542318		AT5G51970	0.00573638	9.7661e-09
AT5G36890	-0.02614	7.44586e-07		AT2G35470	-0.00815125	0.000135886		AT5G16120	-0.0266632	0.000131046		AT5G51490	-0.00604996	0.000554824		AT1G03130	0.0112182	1.08065e-08
AT1G21530	-0.0642939	7.54606e-07		AT4G19390	0.0191164	0.000136847		AT3G25780	0.0273053	0.000131858		AT1G51700	0.0038742	0.000557081		AT1G74730	0.0120156	1.10706e-08
AT1G08090	-0.0285342	7.63828e-07		AT2G45550	-0.0276905	0.000137061		AT3G10320	-0.0308159	0.00013221		AT1G06540	0.0094022	0.000558656		AT2G02850	0.0099331	1.11289e-08
AT5G09520	0.0323762	7.63828e-07		AT1G70580	0.0124887	0.000137754		AT1G74710	-0.0279822	0.000133224		AT1G31710	-0.00345556	0.000558656		AT4G36520	-0.00574416	1.1157e-08
AT4G18550	0.0232917	7.73587e-07		AT2G30600	-0.0124604	0.000139551		AT1G10310	0.026078	0.000133647		AT2G47400	0.00546331	0.000558656		AT3G42180	0.00611972	1.1261e-08
AT1G54120	0.037765	8.11433e-07		AT3G01590	0.00736657	0.000139551		AT1G27100	-0.0188384	0.00013482		AT5G20380	0.00326767	0.000558656		AT4G01985	0.0351997	1.2991e-08
AT4G16260	-0.0354258	8.16359e-07		AT4G04700	-0.0169743	0.000143003		AT4G04640	-0.0442719	0.000135111		AT1G03340	0.00584678	0.000560315		AT1G64160	0.0324075	1.34878e-08
AT4G13770	-0.0233129	8.29419e-07		AT1G14240	0.0139873	0.000143413		AT1G48260	-0.0347909	0.000136905		AT1G22180	0.00384807	0.000560315		AT1G75500	-0.00467584	1.35471e-08
AT5G24180	-0.0788692	8.58287e-07		AT4G15120	0.0114712	0.000143413		AT5G40590	0.0624734	0.000137576		AT1G80820	0.00301568	0.000560315		AT3G12490	0.00422672	1.38883e-08
AT2G37760	0.0216394	8.60016e-07		AT1G11260	-0.0128546	0.000144039		AT3G27220	0.024398	0.000138986		AT5G16010	0.0035016	0.00056391		AT5G17820	-0.00659068	1.41509e-08
AT4G35160	0.0240686	8.74328e-07		AT2G34460	0.0146001	0.000146973		AT2G21540	-0.0388208	0.000142933		AT1G50450	0.00489258	0.000567576		AT5G54960	0.00473549	1.47421e-08
AT1G11080	-0.0346432	8.79849e-07		AT1G35140	0.0216486	0.000147477		AT1G04400	-0.0228908	0.000143923		AT2G22610	-0.00540229	0.000570504		AT2G38270	0.00638791	1.65002e-08
AT1G49960	0.0227554	8.83302e-07		AT1G70210	-0.00903587	0.000148487		AT2G27860	0.0142533	0.000143923		AT3G26395	0.00577078	0.0005722		AT5G13360	0.00531477	1.65606e-08
AT5G12420	0.0219123	8.87647e-07		AT5G11570	-0.0137778	0.00015074		AT3G49780	-0.0606756	0.000143923		AT5G61410	0.00325048	0.000580532		AT4G08770	0.00528781	1.6646e-08
AT5G12840	0.0207336	9.00376e-07		AT3G18280	0.0102037	0.000156302		AT3G58810	-0.0361504	0.000143923		AT5G06640	-0.0185254	0.00058487		AT3G18280	0.00553629	1.66875e-08
AT4G10540	-0.0749638	9.13134e-07		AT1G22990	0.0185396	0.000157603		AT4G15910	0.0436804	0.000143923		AT1G74080	0.00677894	0.000591768		AT4G03520	0.00725684	1.68107e-08
AT1G33890	-0.0642205	9.24428e-07		AT2G20370	0.00541525	0.000158718		AT4G26890	-0.0537727	0.000143923		AT3G54890	0.0079491	0.000593596		AT3G46450	0.00366601	1.69965e-08
AT4G03480	0.0387438	9.62095e-07		AT2G18360	0.0126444	0.000160141		AT5G13080	-0.0409319	0.000143923		AT3G62410	0.0126944	0.000595171		AT5G16810	0.00587935	1.70624e-08
AT5G40860	0.0413946	9.62095e-07		AT2G26690	0.0236665	0.000161856		AT5G20850	0.0435788	0.000143923		AT5G65470	0.00250024	0.000595171		AT3G06760	0.00406544	1.71974e-08
AT1G51870	-0.0499979	9.96969e-07		AT1G67110	-0.0223587	0.000162498		AT5G26667	0.0188797	0.00014413		AT1G61520	0.00749941	0.000601824		AT4G21850	-0.00552116	1.82277e-08
AT2G28160	-0.0291287	1.01738e-06		AT5G26660	-0.0106545	0.000162498		AT5G60120	0.0203473	0.000146387		AT1G77450	0.0033817	0.000604196		AT2G36145	0.017213	1.94384e-08
AT3G57010	0.0303715	1.02645e-06		AT5G24930	0.0101665	0.0001694		AT1G68440	-0.028006	0.000147191		AT1G44575	0.00738257	0.000606282		AT3G25620	0.0136051	2.01287e-08
AT2G46740	-0.0223899	1.02789e-06		AT2G39530	-0.0158591	0.000169953		AT2G36460	0.022675	0.000147209		AT2G18900	-0.00313579	0.000606282		AT5G23220	0.00659518	2.01287e-08
AT4G29210	0.0198747	1.06076e-06		AT4G05520	-0.0091461	0.000170228		AT5G48400	-0.0434943	0.00014837		AT1G20010	-0.00339433	0.00061589		AT5G60200	-0.00451752	2.01287e-08
AT3G44320	0.0177097	1.079e-06		AT2G41210	0.0139411	0.000174811		AT3G53100	-0.0273659	0.000148544		AT5G19855	0.00421694	0.000618397		AT1G35420	0.00992786	2.01977e-08
AT2G16720	0.0204489	1.08368e-06		AT4G24670	-0.0120483	0.000174811		AT3G61750	-0.031176	0.000152354		AT5G57340	0.00512652	0.000622783		AT1G62800	-0.0057613	2.01977e-08
AT2G17845	-0.0935734	1.11028e-06		AT2G28860	0.0356686	0.000175158		AT1G65840	0.0134491	0.000152699		AT4G07820	0.00494758	0.000627082		AT5G12330	0.00797361	2.01977e-08
AT5G17460	0.0360918	1.11655e-06		AT5G19770	-0.00680048	0.000175158		AT3G06390	-0.0566988	0.000152699		AT5G11510	-0.00365065	0.000631193		AT5G16720	-0.00611811	2.02441e-08
AT2G21550	-0.0238771	1.13082e-06		AT3G03980	0.0108403	0.000176021		AT4G13495	0.0496411	0.000153418		AT1G04020	-0.00441403	0.000641672		AT1G18060	0.00774798	2.04622e-08
AT5G56870	0.0285654	1.13338e-06		AT5G24470	-0.0191085	0.000176021		AT1G14280	-0.0675913	0.000159611		AT3G29100	0.00414527	0.000651776		AT1G57990	-0.00905106	2.04622e-08
AT3G53280	-0.0421725	1.15323e-06		AT2G44370	-0.02066	0.000177357		AT5G63450	-0.0477018	0.000162958		AT3G63520	0.00264373	0.00065224		AT2G29450	0.00710799	2.04622e-08
AT3G46900	-0.0355353	1.15743e-06		AT1G11080	-0.0197222	0.000178381		AT3G26300	-0.0449852	0.000163673		AT4G30280	-0.00402522	0.000654073		AT3G59480	-0.0104846	2.04622e-08
AT4G19230	0.0217673	1.19963e-06		AT3G50740	-0.0109185	0.000178381		AT4G27410	-0.0348653	0.000163826		AT3G47380	-0.0050607	0.000659484		AT1G73740	0.00591709	2.0542e-08
AT2G37460	0.0204929	1.21569e-06		AT5G53970	0.0130106	0.000178381		AT1G27290	-0.0289732	0.000167574		AT1G73480	0.00484832	0.000669112		AT1G34370	0.00324625	2.07104e-08
AT3G07195	-0.0356147	1.21713e-06		AT4G38390	-0.0206558	0.000178986		AT1G78800	0.019662	0.000167574		AT3G19290	0.00833703	0.000669112		AT1G22180	0.00477598	2.07911e-08
AT1G20700	-0.0275005	1.23547e-06		AT1G05010	0.00721916	0.000181019		AT1G15290	-0.0218716	0.000167618		AT2G34490	-0.00405208	0.000680469		AT5G22140	-0.00712746	2.23856e-08
AT1G55320	-0.0232108	1.24785e-06		AT3G06760	0.00967432	0.000185182		AT3G13950	-0.0357913	0.000170609		AT1G11080	0.0037855	0.000687144		AT5G20620	0.00345317	2.23905e-08
AT2G34350	0.0330472	1.24785e-06		AT5G45950	0.0438963	0.000185182		AT1G77090	0.0535304	0.000171256		AT1G08380	0.00825127	0.000692189		AT4G24580	-0.00704607	2.2492e-08
AT5G24290	0.016858	1.29694e-06		AT5G61650	0.0193922	0.000185182		AT4G23980	-0.0181396	0.000171256		AT1G19220	-0.00370544	0.000698656		AT1G13210	-0.00439783	2.32107e-08
AT3G50400	0.0255042	1.30478e-06		AT3G19200	0.0174702	0.000185207		AT2G02120	0.0378039	0.000174273		AT3G23820	-0.00270063	0.000705774		AT5G61550	-0.0100212	2.32675e-08
AT4G33080	0.0112952	1.31562e-06		AT2G38540	0.018095	0.000187952		AT5G47720	-0.0261057	0.000175764		AT4G26010	-0.0111168	0.00070746		AT3G16190	0.00822072	2.36841e-08
AT3G48450	-0.031778	1.4725e-06		AT4G19460	0.0141679	0.000187952		AT5G43120	-0.10332	0.000181526		AT3G01175	0.00751511	0.00071669		AT4G27290	-0.0116062	2.3964e-08
AT4G23920	0.025528	1.53534e-06		AT4G36210	0.0078938	0.000188917		AT1G73660	-0.0291253	0.000182949		AT5G41080	0.00494968	0.000719808		AT5G63600	0.00448932	2.42266e-08
AT3G22620	0.0228194	1.53878e-06		AT1G01800	0.00646397	0.000189552		AT4G28040	-0.0361444	0.000182949		AT2G20260	0.00665027	0.000723325		AT1G37130	0.00597292	2.55273e-08
AT1G22160	0.046419	1.60206e-06		AT4G39350	-0.00752957	0.000189627		AT1G53790	0.0376261	0.000183414		AT1G60730	0.00464106	0.000723434		AT5G06370	0.00455228	2.60088e-08
AT1G21230	-0.0750206	1.62702e-06		AT2G43570	0.0163559	0.000190101		AT4G02120	-0.0169594	0.000186228		AT1G22530	-0.00525543	0.000723831		AT3G03770	0.00613027	2.62559e-08
AT4G25030	-0.0160154	1.64691e-06		AT1G33560	0.00919269	0.000190989		AT2G39040	-0.0634867	0.000186845		AT5G22270	0.00775317	0.000729385		AT1G16390	-0.0394193	2.65906e-08
AT4G33710	-0.0761193	1.72084e-06		AT1G51340	-0.0150811	0.000191211		AT5G62020	-0.0352072	0.000186845		AT1G23730	0.00997445	0.000735595		AT3G52460	-0.0111739	2.69941e-08
AT3G23175	-0.020696	1.72527e-06		AT3G45840	-0.0207146	0.000192724		AT5G44770	-0.0821367	0.000186914		AT4G36250	-0.00353661	0.000741362		AT5G19740	-0.00460119	2.69941e-08
AT4G35350	0.0157241	1.80362e-06		AT2G46930	0.00873558	0.000195313		AT1G52060	-0.0468152	0.0001889		AT3G11930	0.00389114	0.000753044		AT4G36195	0.00342368	2.72541e-08
AT4G29180	0.0287031	1.86696e-06		AT1G76980	0.00825898	0.000199794		AT5G18255	0.0491094	0.00019006		AT5G61550	-0.00555745	0.000754084		AT1G05170	0.00453986	2.76991e-08
AT1G36370	0.0154917	1.86713e-06		AT1G05200	-0.0142295	0.000204301		AT1G20490	-0.0337976	0.000192436		AT2G05075	0.00719077	0.000762772		AT2G35900	0.00507872	2.7751e-08
AT5G59930	-0.0347428	1.87539e-06		AT4G03540	0.0192637	0.000204301		AT5G53450	-0.0154213	0.000192436		AT1G52220	0.00715289	0.00076888		AT5G45280	0.00433711	2.80997e-08
AT1G78070	0.0255266	1.89593e-06		AT5G14780	0.0130764	0.000205663		AT1G70880	-0.0624058	0.000192995		AT3G47470	0.00538498	0.000778023		AT3G26830	0.0101779	2.83372e-08
AT1G53180	0.0202649	1.90996e-06		AT1G52800	-0.00895122	0.000206007		AT1G27950	0.0348929	0.000194114		AT1G06680	0.00589389	0.000780097		AT4G01150	0.00610376	2.86428e-08
AT4G29110	0.0304247	1.95026e-06		AT5G55180	0.0118715	0.000210766		AT1G58200	-0.0185246	0.000194114		AT5G41800	0.00351398	0.000785942		AT1G65590	-0.00430594	2.86455e-08
AT5G62470	0.0382046	1.95044e-06		AT5G63790	0.00598104	0.0002116		AT3G43960	-0.0331455	0.000194114		AT1G73880	0.00309435	0.000790379		AT1G80270	-0.0053864	2.87976e-08
AT4G32690	-0.0263334	1.96872e-06		AT1G69410	0.0103169	0.000211813		AT4G30280	-0.0381126	0.000194114		AT1G66500	0.0057877	0.000793717		AT1G33970	0.0044561	2.96904e-08
AT4G19750	-0.10822	1.96902e-06		AT1G14480	-0.0162232	0.000217785		AT1G07930	0.0170662	0.000194971		AT2G39800	0.00336385	0.000798205		AT4G18480	0.00506903	3.17198e-08
AT2G44300	0.0227885	2.04385e-06		AT1G74790	0.00643986	0.000220256		AT2G48030	0.0227306	0.000200959		AT5G11110	0.00428879	0.000807665		AT5G63000	0.0058047	3.19667e-08
AT5G14780	0.0218184	2.04681e-06		AT4G18010	0.0121226	0.000220738		AT3G19580	-0.0237931	0.000201894		AT5G27450	-0.00400465	0.00081685		AT1G58320	-0.0112485	3.22468e-08
AT1G77520	0.0298568	2.04992e-06		AT3G58810	-0.0102598	0.000224014		AT5G02240	0.030201	0.000201894		AT3G53190	-0.00379811	0.000828533		AT1G13420	-0.0105115	3.30195e-08
AT5G49780	-0.0311154	2.17957e-06		AT2G32930	0.00941802	0.000227987		AT5G18550	0.028333	0.000201894		AT1G13360	0.00317029	0.000849982		AT1G53910	0.00256265	3.30195e-08
AT2G29380	0.0852666	2.19621e-06		AT4G08390	0.00605042	0.000228712		AT4G13310	-0.0874105	0.000202329		AT5G17420	-0.00451067	0.000853075		AT1G22500	0.00628282	3.39456e-08
AT1G63000	0.0144993	2.22152e-06		AT3G53230	0.00891141	0.000234955		AT1G07350	0.0321775	0.000206255		AT1G59540	-0.00487549	0.000856126		AT4G01100	0.00261331	3.39456e-08
AT2G47550	-0.0247662	2.31293e-06		AT5G03560	0.0100118	0.000235481		AT2G38130	0.023082	0.000206399		AT4G04940	-0.00424418	0.000865771		AT1G76990	-0.00401972	3.41408e-08
AT1G78660	0.01506	2.32601e-06		AT5G03380	-0.00805661	0.000236328		AT1G61360	-0.0332497	0.000208856		AT3G61898	0.0107655	0.000869402		AT4G18700	0.00375076	3.44349e-08
AT5G23030	0.0352935	2.3609e-06		AT3G14415	-0.0117254	0.000238728		AT3G17820	0.01801	0.000209153		AT5G59010	-0.0037695	0.000869402		AT1G67365	0.0108407	3.49481e-08
AT5G45090	-0.0524359	2.37706e-06		AT3G25900	0.0111895	0.000240008		AT2G02950	-0.0288389	0.00020921		AT1G67000	0.00885952	0.000884771		AT1G23740	0.0101749	3.60427e-08
AT2G15830	-0.0279214	2.39736e-06		AT3G52840	-0.0196743	0.000243311		AT3G47790	-0.0169227	0.000209607		AT5G02640	0.00406018	0.000887167		AT4G21326	-0.00960389	3.64832e-08
AT4G36820	0.0497374	2.4534e-06		AT1G65860	-0.0274013	0.000244454		AT3G15990	-0.0427215	0.000210673		AT5G67030	0.002934	0.000891872		AT3G12270	-0.00441297	3.82366e-08
AT1G26800	0.0221072	2.55027e-06		AT2G31083	0.0213331	0.000246353		AT2G25150	-0.0460406	0.000211921		AT3G05400	0.0052421	0.000903263		AT5G63580	0.00835519	3.82366e-08
AT1G15420	-0.0171087	2.56211e-06		AT1G78610	0.0102954	0.000251884		AT4G13290	-0.0317759	0.00021266		AT5G24330	-0.00486714	0.000912993		AT3G02030	-0.00744722	3.87081e-08
AT5G04150	0.0381021	2.56211e-06		AT2G29330	-0.0163697	0.000251884		AT3G29680	-0.0407949	0.000212971		AT5G21080	-0.00615062	0.000917308		AT4G37070	-0.00488673	3.89194e-08
AT3G09390	0.0349887	2.57328e-06		AT5G56080	0.0199047	0.000251884		AT3G51330	-0.029903	0.000212971		AT5G42600	-0.00707464	0.000920094		AT1G69530	0.00469653	3.89738e-08
AT1G48500	-0.0406521	2.67525e-06		AT4G25850	0.0232421	0.000254878		AT1G10340	-0.0660056	0.000213168		AT3G14530	-0.00427398	0.000942637		AT5G39580	0.013886	3.91377e-08
AT1G52700	-0.035072	2.6871e-06		AT4G27000	0.00491547	0.00025725		AT2G14900	0.0345602	0.000213168		AT1G13590	0.00453772	0.00095494		AT4G00940	0.00460713	3.92227e-08
AT5G38820	-0.030104	2.69696e-06		AT5G21930	-0.0147774	0.000262046		AT4G04620	0.0277185	0.000213168		AT3G14590	0.00317754	0.00095494		AT1G67120	-0.00638222	3.95787e-08
AT2G35840	0.0144514	2.73128e-06		AT3G05400	0.0237576	0.000262089		AT4G39730	0.0319184	0.000213168		AT3G22840	0.00571708	0.00095494		AT3G10200	0.011067	4.13121e-08
AT1G48850	-0.0133534	2.7549e-06		AT2G47550	-0.0207397	0.000262431		AT5G66140	0.02499	0.000213985		AT3G56870	-0.00434765	0.00095494		AT3G02470	0.00438907	4.13599e-08
AT5G61810	0.0220793	2.78813e-06		AT5G19780	-0.00667561	0.000262431		AT2G31790	-0.0403538	0.000215045		AT5G20230	0.00826162	0.00095494		AT2G02120	0.00944419	4.14021e-08
AT5G60360	0.015945	2.8564e-06		AT2G28160	-0.013269	0.000270259		AT5G42960	0.0219895	0.000215533		AT5G53360	0.00469837	0.00095494		AT1G67110	-0.0126663	4.15954e-08
AT1G76180	0.0185462	2.8959e-06		AT1G75750	-0.019999	0.000270427		AT4G19860	-0.0211648	0.000220204		AT5G64940	0.00425556	0.00095494		AT3G47740	-0.0127722	4.17779e-08
AT3G46270	-0.0482463	2.92967e-06		AT3G10985	-0.0128637	0.000270427		AT1G52820	-0.0498823	0.000223332		AT5G47950	-0.0060541	0.00095994		AT4G21750	-0.0132385	4.25772e-08
AT2G44380	-0.0268289	3.00369e-06		AT1G48420	0.00581906	0.000273347		AT5G61420	-0.0237669	0.000223332		AT5G59020	-0.00451005	0.00098383		AT1G03700	-0.0110233	4.50921e-08
AT1G64200	0.0179017	3.03515e-06		AT5G16480	-0.0125941	0.000273432		AT3G16370	0.0327928	0.000223719		AT4G12070	0.00323409	0.000990505		AT3G14840	-0.00463154	4.57105e-08
AT1G29740	-0.0441562	3.09127e-06		AT2G16970	-0.016696	0.000274241		AT5G17230	-0.0315489	0.000223719		AT4G28840	-0.00362886	0.000990505		AT3G16140	0.00928727	4.59728e-08
AT3G05937	0.0344362	3.09339e-06		AT1G20010	-0.0104063	0.000274704		AT4G16765	0.0204871	0.000225404		AT1G51140	0.00340417	0.00100136		AT5G50800	0.00703806	4.72355e-08
AT5G64900	0.0300287	3.10193e-06		AT3G49220	0.00951322	0.000274704		AT3G29630	-0.0334946	0.000227089		AT1G32450	0.00437046	0.00100256		AT5G04430	-0.00289013	4.77498e-08
AT4G31020	-0.0537329	3.18815e-06		AT1G11460	-0.030433	0.000279894		AT3G18520	0.0155115	0.000228283		AT4G25630	-0.00254433	0.00100779		AT4G19200	0.00623791	4.78725e-08
AT4G02380	-0.0333864	3.20869e-06		AT3G14680	0.00908011	0.000286663		AT4G22610	-0.0496915	0.000231701		AT4G21400	0.00399222	0.00101754		AT3G53210	0.00676813	4.85537e-08
AT3G59910	-0.0216462	3.28674e-06		AT5G40020	0.0120444	0.000286663		AT2G28110	-0.0350943	0.00023306		AT5G52560	-0.00387017	0.00103687		AT1G16440	-0.0107272	4.88769e-08
AT5G54690	0.0249025	3.38197e-06		AT2G43880	0.0152205	0.000288478		AT5G45210	0.0272471	0.00023306		AT3G01590	0.00235259	0.00103983		AT2G39730	0.00785029	4.92691e-08
AT5G12470	-0.0122211	3.43526e-06		AT5G17460	0.0106915	0.000288478		AT3G18830	0.0259443	0.000234786		AT5G58800	0.00298574	0.00105368		AT2G20890	0.00398033	4.97786e-08
AT1G66930	-0.0300282	3.49071e-06		AT1G50060	0.0201167	0.000290685		AT5G44460	-0.0495642	0.000234786		AT1G33790	-0.00594936	0.00106158		AT5G47810	0.00762086	4.97786e-08
AT3G58990	-0.0242986	3.55334e-06		AT5G44900	-0.0172167	0.000290685		AT3G47820	-0.0247303	0.000234957		AT4G37940	0.00291483	0.00106158		AT1G04410	0.00355158	5.15946e-08
AT2G24180	0.0153002	3.56619e-06		AT1G52410	0.0157591	0.000299258		AT1G13110	-0.0286016	0.000235166		AT2G01590	0.0111266	0.00106743		AT3G21270	0.00724026	5.36276e-08
AT3G19390	0.017184	3.64113e-06		AT2G23000	0.0212849	0.000300022		AT2G22100	0.02116	0.000238422		AT2G35370	0.00631286	0.00107048		AT1G04570	0.00937954	5.40605e-08
AT3G20360	-0.0485296	3.69478e-06		AT2G40250	0.0188382	0.000302009		AT2G19260	0.0244901	0.000241395		AT3G63110	-0.00500985	0.00107943		AT5G57900	0.00591474	5.55919e-08
AT1G26700	-0.0298238	3.70598e-06		AT3G56590	-0.00926793	0.000306282		AT5G16990	0.0292124	0.000241395		AT4G10380	0.00230638	0.00107943		AT3G10985	-0.00481211	5.63932e-08
AT3G03341	0.0604833	3.79106e-06		AT1G05650	0.0304087	0.000306603		AT4G36020	0.0223138	0.000243645		AT4G09460	0.00340658	0.00109172		AT2G23170	-0.0114593	5.65896e-08
AT1G74500	-0.0208197	3.82718e-06		AT1G55920	0.00717204	0.000308736		AT4G37520	-0.0164893	0.000243667		AT1G10960	0.00486701	0.00109398		AT1G18870	-0.0203098	5.69061e-08
AT2G46270	0.021646	4.15413e-06		AT2G02120	0.0205002	0.000308736		AT1G19000	-0.0256403	0.000244028		AT1G76890	-0.00430347	0.00110399		AT2G42060	-0.00698554	5.73628e-08
AT1G22550	0.0186319	4.19029e-06		AT2G44480	0.0193402	0.000312928		AT1G09090	-0.0227784	0.000245009		AT3G25717	0.00561369	0.00110399		AT2G41190	0.00847456	5.91243e-08
AT1G72770	0.0163978	4.30766e-06		AT5G19855	0.0119875	0.00031945		AT4G15550	-0.0252704	0.000246899		AT1G12040	-0.00685655	0.00111677		AT4G29180	-0.0066729	5.91243e-08
AT3G44840	-0.0647399	4.30766e-06		AT3G27220	0.0114937	0.000321855		AT1G79820	0.0253653	0.000250425		AT5G64550	0.00319766	0.00113033		AT5G19730	0.0064455	5.91337e-08
AT2G20520	0.0338666	4.36052e-06		AT1G22740	-0.0146154	0.000329721		AT5G15090	0.0177639	0.000250425		AT4G20940	-0.00316621	0.00113412		AT1G69440	-0.0108291	5.99953e-08
AT5G17770	-0.0124759	4.36052e-06		AT5G42240	-0.010291	0.000329748		AT2G19590	-0.0378241	0.000252398		AT1G62280	-0.00432471	0.00113693		AT2G31141	0.0162477	6.06974e-08
AT4G14570	0.0146011	4.43325e-06		AT2G29340	0.0242682	0.000331324		AT4G01970	-0.0757039	0.000252921		AT2G42610	-0.00841601	0.00113693		AT4G32260	0.0056642	6.06974e-08
AT2G32390	-0.0322048	4.48379e-06		AT1G44770	-0.00719555	0.000332259		AT1G47760	0.0394639	0.000257		AT2G35980	-0.00968387	0.00113696		AT3G55450	0.00332391	6.1946e-08
AT3G13760	-0.0273566	4.56005e-06		AT1G30500	0.0112728	0.000333178		AT1G09310	0.0739342	0.000258613		AT2G31220	-0.0148466	0.00114071		AT1G30650	0.00573223	6.34253e-08
AT5G36140	0.080415	4.56957e-06		AT5G13360	0.0121172	0.000334023		AT3G03990	-0.0307734	0.000258613		AT4G13890	-0.00583364	0.00114071		AT1G58370	-0.0101755	6.34253e-08
AT4G30210	-0.0138567	4.63816e-06		AT4G30690	-0.0129131	0.000339566		AT5G38540	-0.0322864	0.000258613		AT4G37180	0.0025735	0.00114071		AT1G21100	-0.00624362	6.38103e-08
AT5G61420	-0.0175444	4.86433e-06		AT5G46720	0.0240369	0.000339566		AT4G04630	-0.036605	0.000263064		AT5G17670	0.00483599	0.0011421		AT1G62810	0.00531691	6.45198e-08
AT4G37070	0.02288	4.95287e-06		AT1G21400	0.028781	0.000344341		AT3G53960	-0.0562126	0.000263941		AT2G28080	-0.00362245	0.0011431		AT5G39970	-0.00634807	6.45198e-08
AT4G18940	-0.0529713	4.95785e-06		AT5G12140	0.0121247	0.000346745		AT4G31500	-0.0234852	0.000263941		AT5G18980	-0.00411502	0.00114343		AT2G04170	-0.00503945	6.46161e-08
AT1G68620	0.0486195	5.0155e-06		AT4G30960	0.00724919	0.000349521		AT1G09815	0.0336109	0.00026658		AT1G23090	-0.00657951	0.00116214		AT1G07870	0.00398505	6.50187e-08
AT5G26220	0.0360601	5.01725e-06		AT1G09795	0.0104991	0.000352786		AT4G11650	-0.023463	0.000268459		AT3G57940	-0.00409591	0.00117069		AT3G10410	0.00360534	6.57844e-08
AT3G12920	-0.0153589	5.11217e-06		AT5G06530	0.0234207	0.000353497		AT4G34610	-0.0307136	0.000268459		AT1G78970	-0.00602724	0.0011758		AT4G12580	0.00821881	6.77638e-08
AT4G28940	0.029297	5.13685e-06		AT3G27570	0.00685518	0.000358843		AT5G63700	0.031237	0.000270054		AT3G01520	0.00279454	0.00119258		AT5G44020	-0.0038849	6.78474e-08
AT2G37090	0.0231446	5.20649e-06		AT5G20470	-0.0462443	0.000366154		AT4G29020	0.0428024	0.000271945		AT3G51820	0.00347438	0.00121818		AT5G18350	-0.0225754	6.8979e-08
AT2G04100	0.0232786	5.26239e-06		AT5G67340	0.0100701	0.000370497		AT3G46190	-0.0699332	0.000272448		AT3G25910	0.00269886	0.00122441		AT1G48930	-0.00751602	6.9733e-08
AT1G58410	-0.0293999	5.28697e-06		AT4G32060	-0.00531498	0.000376455		AT2G43910	-0.0365659	0.000272591		AT2G46220	0.00450281	0.00123799		AT5G26200	0.0105279	7.01824e-08
AT3G49120	0.0235273	5.30003e-06		AT1G71710	0.00965522	0.000377915		AT1G49320	-0.0283758	0.000273518		AT4G21820	-0.00451035	0.00124072		AT3G09330	-0.0146252	7.15509e-08
AT4G28811	-0.103795	5.43344e-06		AT3G50930	-0.00896822	0.000384152		AT1G76510	0.0170236	0.000274894		AT1G70250	0.00421708	0.00124197		AT4G39730	0.00553511	7.30749e-08
AT2G44490	-0.0175582	5.5008e-06		AT1G16905	0.0219722	0.000398851		AT3G52450	-0.0273221	0.000281419		AT1G03630	0.00502605	0.00125406		AT3G48340	-0.00551931	7.56666e-08
AT3G01513	0.026421	5.5436e-06		AT3G62150	-0.0141146	0.000400753		AT5G52250	-0.0391916	0.000284552		AT4G04620	0.00406518	0.00125485		AT5G25250	-0.00938357	7.56666e-08
AT3G44550	0.0194719	5.5436e-06		AT3G29575	0.0146228	0.000401467		AT1G53580	-0.014838	0.000288809		AT1G52750	-0.00440713	0.00125665		AT5G39530	0.00814507	7.60965e-08
AT1G05300	0.0353461	5.61957e-06		AT4G17650	0.0082142	0.000407926		AT1G63450	-0.0357324	0.000289034		AT3G46280	-0.00395507	0.00126071		AT4G17030	0.00867422	7.62958e-08
AT1G10670	0.0082602	5.65506e-06		AT4G17840	0.0092929	0.000411		AT1G73270	-0.034771	0.000299268		AT5G14430	-0.00198409	0.00126714		AT5G21080	-0.0118317	7.6388e-08
AT5G41410	0.0272812	5.87887e-06		AT5G23820	0.00994673	0.000420753		AT1G05340	-0.0387367	0.000303877		AT5G50130	0.00521506	0.00126934		AT3G29575	0.0065777	7.71696e-08
AT5G23830	0.0214382	5.95645e-06		AT3G45210	0.0110118	0.000423271		AT2G16660	-0.0354497	0.000304601		AT3G61470	0.00795423	0.00127722		AT5G56150	0.00688307	7.71696e-08
AT1G75370	0.0145123	6.0406e-06		AT1G05700	-0.0218826	0.000423815		AT5G25440	-0.0373386	0.000310678		AT1G04610	-0.0045557	0.001279		AT5G03230	0.00946739	7.80653e-08
AT5G58750	-0.033811	6.15292e-06		AT4G36790	-0.00947143	0.00042402		AT1G63720	-0.0252712	0.000313023		AT1G16720	0.00291077	0.00130379		AT5G08050	0.0092122	8.01686e-08
AT4G09760	0.0261556	6.21924e-06		AT3G01120	-0.006388	0.000425048		AT1G22710	-0.0446823	0.0003143		AT3G09910	0.00593504	0.00130756		AT1G67230	-0.00460853	8.06548e-08
AT1G73600	-0.0212087	6.33594e-06		AT5G61590	-0.0208275	0.000427311		AT4G31310	-0.0345954	0.000316746		AT4G22910	-0.00294531	0.00131115		AT1G70210	-0.00588702	8.06548e-08
AT1G08990	0.0168162	6.36323e-06		AT1G35350	-0.0214419	0.000430042		AT1G64900	-0.0312735	0.000324132		AT1G65060	0.00825243	0.00133365		AT5G41210	0.00461275	8.15503e-08
AT1G13420	0.0226071	6.47285e-06		AT5G48570	0.010643	0.000447188		AT1G78990	-0.0299946	0.000324132		AT4G02110	-0.00320196	0.00133365		AT5G29000	0.00394165	8.29705e-08
AT4G30810	0.0139584	6.51498e-06		AT1G65660	0.0085518	0.000448988		AT4G01350	-0.0256037	0.000324974		AT4G27000	0.00164249	0.00133365		AT1G05470	-0.005172	8.36244e-08
AT4G19030	0.0194451	6.64295e-06		AT1G50740	0.00945922	0.000450091		AT1G66980	-0.0598018	0.000328183		AT4G31150	0.00327279	0.00133365		AT5G18840	0.00571899	8.42702e-08
AT4G08950	-0.0263529	6.73113e-06		AT4G28880	-0.00438797	0.000450091		AT2G40110	-0.0301337	0.000328264		AT5G13490	0.00258347	0.0013362		AT2G46830	0.00485939	8.59321e-08
AT1G44318	0.0629868	6.75907e-06		AT1G64970	0.0140695	0.000453684		AT3G20960	-0.0226414	0.00033016		AT1G63450	-0.00623349	0.00134429		AT1G62710	0.00829908	8.92702e-08
AT5G63590	0.0180835	6.761e-06		AT1G73880	0.00968666	0.000453684		AT5G27920	-0.0249326	0.000331283		AT4G14960	-0.00226529	0.00134429		AT5G42500	-0.00701434	9.25015e-08
AT1G29640	0.0379716	6.89327e-06		AT2G24550	-0.0106577	0.00045539		AT5G48480	0.024625	0.000335495		AT5G38020	-0.00315268	0.00134429		AT5G15970	0.00828985	9.42518e-08
AT3G12820	-0.0308258	6.97588e-06		AT1G06620	0.0106084	0.000463774		AT4G38130	0.0169059	0.000339943		AT5G54390	0.00311998	0.00134429		AT4G12030	-0.00821903	1.02037e-07
AT1G12110	-0.0262434	7.04068e-06		AT1G23800	0.0117498	0.000464512		AT5G02260	0.0196553	0.000341049		AT4G30420	-0.00541781	0.00134479		AT3G17930	0.0072432	1.0579e-07
AT4G16670	0.0639963	7.34719e-06		AT1G07400	0.032609	0.000476652		AT5G66480	0.0336949	0.000341049		AT4G39700	0.00660596	0.00134927		AT5G61510	0.00416001	1.07715e-07
AT1G34520	0.0479962	7.55635e-06		AT1G16150	-0.0211697	0.000478292		AT5G66130	0.0286374	0.000343512		AT4G34260	-0.00374986	0.00134993		AT3G50440	0.0199654	1.10573e-07
AT4G27370	-0.0324368	7.59765e-06		AT2G37130	-0.00983522	0.000487009		AT4G23820	0.0272466	0.000346167		AT5G10930	0.00324361	0.0013512		AT5G51790	-0.00799385	1.10573e-07
AT3G49630	-0.0459654	7.72371e-06		AT4G10310	0.0651905	0.000492874		AT1G10920	-0.06758	0.000350119		AT1G70890	-0.00318317	0.00136095		AT1G53035	0.00929572	1.142e-07
AT4G02280	0.0379531	7.73719e-06		AT1G13090	0.0105305	0.000498031		AT1G62280	-0.0492593	0.00035159		AT3G17790	0.00606955	0.00136181		AT1G51890	-0.00818621	1.19446e-07
AT1G31070	0.0134657	7.93908e-06		AT4G01140	-0.0128895	0.000498031		AT5G41080	-0.0295852	0.000353782		AT4G39030	-0.00393132	0.00136455		AT2G18300	-0.0235877	1.22511e-07
AT3G05640	0.0185434	8.18402e-06		AT4G37940	0.0090852	0.000498031		AT1G19960	-0.0598266	0.000357059		AT4G35210	-0.0138551	0.00137772		AT2G23060	-0.0113852	1.22748e-07
AT5G57150	0.018314	8.23501e-06		AT1G17550	0.00697539	0.000499177		AT1G60750	-0.0399344	0.00036139		AT2G36320	0.00264725	0.00138962		AT2G13290	0.00685538	1.23969e-07
AT2G43290	0.0176967	8.27871e-06		AT1G15460	0.0141881	0.000504922		AT2G30130	0.0323847	0.000361834		AT5G49230	0.00316502	0.00139683		AT2G41530	0.00452147	1.25175e-07
AT1G64890	0.0185462	8.49402e-06		AT3G10500	-0.00564867	0.000504922		AT3G56270	0.0259227	0.000363776		AT5G06990	-0.00786266	0.00142596		AT1G01640	0.00732083	1.25996e-07
AT2G27190	0.0141908	8.52836e-06		AT4G21680	0.0318752	0.000511675		AT1G13080	-0.0478863	0.000364712		AT1G73805	-0.0104427	0.0014364		AT3G56590	-0.00551031	1.27695e-07
AT5G64687	-0.0780125	8.6339e-06		AT1G62300	0.00645397	0.000513692		AT4G24040	-0.0350185	0.000364712		AT4G33790	-0.00671568	0.00143792		AT2G02950	-0.0078031	1.29877e-07
AT5G37500	0.0241728	8.92826e-06		AT1G54970	0.024144	0.000514515		AT1G34640	0.0553664	0.000364814		AT5G54170	0.00316466	0.00143792		AT5G22940	-0.00489018	1.29877e-07
AT1G80380	-0.0193168	9.16303e-06		AT1G54030	0.00932323	0.000517342		AT3G07390	0.0220104	0.000370662		AT5G42510	-0.00599391	0.00144272		AT1G11170	0.00608221	1.31182e-07
AT2G45590	-0.0230924	9.29976e-06		AT2G46650	-0.0164559	0.000525685		AT5G03780	0.0339691	0.000373742		AT5G50260	-0.00767263	0.00144335		AT3G20500	0.00433492	1.31917e-07
AT1G20850	0.0128235	9.4713e-06		AT3G30210	0.0468089	0.000527188		AT1G13540	-0.0823824	0.000381169		AT3G57060	-0.00341245	0.00144997		AT2G04070	-0.0221524	1.32125e-07
AT5G18130	0.0212593	9.543e-06		AT5G63700	0.0114873	0.000527188		AT1G69550	-0.0400913	0.000381169		AT4G20210	-0.00546092	0.00146496		AT1G78260	-0.00563174	1.32305e-07
AT5G45240	-0.0425776	9.60358e-06		AT2G16890	0.00858445	0.000528973		AT2G43550	-0.0679617	0.000381169		AT5G10770	-0.00337421	0.00147658		AT3G54040	-0.00677081	1.32723e-07
AT3G12150	-0.0225538	9.61107e-06		AT2G43535	0.0124173	0.000544659		AT5G54700	-0.113723	0.000381398		AT5G22290	0.00427754	0.00150179		AT4G26640	0.00328988	1.33835e-07
AT3G47050	-0.0274169	9.68582e-06		AT1G80920	-0.0134466	0.000549766		AT5G44130	-0.123377	0.000384025		AT1G67920	0.00444312	0.00151387		AT5G23010	-0.00804327	1.34472e-07
AT2G43020	0.0143083	9.83332e-06		AT5G08380	0.00874944	0.000554492		AT5G65280	-0.0250916	0.000384025		AT1G73330	-0.00309914	0.00152474		AT4G19230	0.00512572	1.36064e-07
AT2G29070	0.0260872	9.97238e-06		AT3G59670	-0.00777119	0.000563067		AT5G35940	-0.0477601	0.000385051		AT3G29575	0.0053769	0.00154368		AT3G61890	0.00511919	1.38917e-07
AT5G24780	0.0363771	1.03311e-05		AT2G16750	-0.00980251	0.000564747		AT5G55970	-0.036183	0.000385455		AT3G23260	0.005198	0.00154675		AT5G03995	-0.00895745	1.41341e-07
AT4G20450	-0.06597	1.04674e-05		AT2G44300	0.0115427	0.000564747		AT2G31220	-0.11159	0.000389045		AT2G45180	0.0121098	0.0015519		AT3G19450	-0.00325304	1.4558e-07
AT1G78050	-0.0190991	1.08837e-05		AT5G07770	-0.00994729	0.000564747		AT1G25230	-0.0376154	0.000391725		AT3G49180	-0.00325156	0.00155729		AT1G48000	0.0108443	1.50548e-07
AT1G71400	-0.029266	1.10603e-05		AT3G12977	-0.0138429	0.000575199		AT1G51510	0.0189608	0.000391725		AT5G15950	0.00268044	0.00155729		AT2G01490	0.00311303	1.51959e-07
AT2G42790	0.0121093	1.10603e-05		AT4G15740	-0.0183782	0.000579374		AT3G15000	0.0178381	0.000395339		AT3G02350	-0.0019343	0.00156113		AT1G53470	0.00579183	1.55715e-07
AT4G21580	0.0154354	1.10603e-05		AT1G53680	-0.0168934	0.000600685		AT1G16850	0.0481504	0.000395882		AT5G17010	0.00457318	0.00157855		AT3G51895	0.012229	1.57186e-07
AT2G19600	-0.0150198	1.13358e-05		AT5G43870	0.0174616	0.000605343		AT1G75820	-0.0203363	0.000407563		AT1G25422	0.00910378	0.00159667		AT4G37700	-0.00915397	1.57186e-07
AT3G02140	-0.0283411	1.17934e-05		AT1G33320	-0.0491369	0.000607403		AT3G01990	-0.0324963	0.000409845		AT3G26085	0.00468338	0.00159667		AT5G52120	-0.00714441	1.57186e-07
AT3G22970	0.0163583	1.17934e-05		AT1G63180	-0.0245111	0.000612138		AT3G09220	-0.0370574	0.000410599		AT1G17550	0.00229586	0.00161073		AT2G27830	-0.00416454	1.58534e-07
AT3G54450	0.0287974	1.18495e-05		AT1G05280	0.0156709	0.000617834		AT3G01820	0.0324264	0.000411652		AT5G57790	0.00514581	0.00161447		AT5G03460	0.00585451	1.59123e-07
AT1G02310	0.0407298	1.18841e-05		AT2G32560	-0.0106658	0.000625505		AT5G51050	0.0228035	0.000412559		AT2G24850	-0.0133743	0.0016291		AT5G62540	0.00467235	1.61654e-07
AT3G01080	-0.049673	1.19851e-05		AT5G24800	0.010599	0.000627041		AT5G28290	0.0175241	0.000418034		AT3G09390	0.00463181	0.0016291		AT1G77710	0.00714512	1.63268e-07
AT3G20370	0.0255608	1.21245e-05		AT5G20230	0.0226143	0.000631978		AT4G16770	0.0246217	0.000418212		AT1G28520	0.00201015	0.00163038		AT3G17510	-0.00637169	1.6457e-07
AT4G34000	0.0173421	1.23965e-05		AT5G09980	0.0167492	0.000634565		AT1G35320	0.0231148	0.000419153		AT3G47740	-0.00518136	0.001644		AT2G43970	0.00425891	1.67697e-07
AT5G65980	-0.0292763	1.25297e-05		AT4G27590	0.0330784	0.000637845		AT3G47300	-0.0327112	0.000419844		AT1G48450	0.0026446	0.00164526		AT3G44290	0.00996028	1.67697e-07
AT5G65470	0.0145781	1.2622e-05		AT5G66460	0.010046	0.000639663		AT1G75440	-0.0234653	0.000422449		AT5G64250	0.00421884	0.00164757		AT4G35090	0.00477365	1.69068e-07
AT1G17180	0.0368109	1.2837e-05		AT1G72010	-0.00805879	0.000643957		AT1G78580	-0.0190136	0.000422449		AT1G73885	0.00368629	0.00165208		AT2G14960	-0.0118804	1.69199e-07
AT4G23050	0.0187198	1.2862e-05		AT4G33070	0.00753808	0.000643957		AT2G24100	-0.0258282	0.000424971		AT3G05220	-0.00328443	0.00165208		AT3G14395	0.0171823	1.69199e-07
AT2G35930	-0.0280955	1.29904e-05		AT3G08660	-0.0253126	0.000645041		AT1G77330	-0.019457	0.000427304		AT1G08230	0.00538576	0.00165294		AT5G58800	0.00622427	1.75746e-07
AT3G21351	-0.0406578	1.29904e-05		AT1G69530	0.0121776	0.000649848		AT4G29950	-0.0223783	0.000443174		AT2G35736	0.00500338	0.00165983		AT1G66800	-0.00726785	1.77891e-07
AT5G26290	0.0249335	1.31674e-05		AT2G38800	-0.00689502	0.000652232		AT5G58160	-0.0284296	0.000449327		AT4G02380	0.00410436	0.00166129		AT1G73290	-0.0122629	1.8153e-07
AT1G07680	-0.0807533	1.33447e-05		AT1G52790	-0.0144893	0.000657479		AT1G44750	0.0200269	0.000452614		AT5G56520	0.00737484	0.00167177		AT5G42600	0.0136854	1.85907e-07
AT5G63970	0.0148775	1.34721e-05		AT2G34850	0.0160138	0.000662759		AT5G45440	-0.039765	0.000452993		AT3G21270	0.00409347	0.00168204		AT5G43850	0.00540542	1.85907e-07
AT1G14120	0.0301611	1.35125e-05		AT1G55740	0.0110233	0.00066951		AT5G65683	-0.0240554	0.000452993		AT3G51750	0.00763272	0.00168491		AT2G17150	0.0034968	1.89638e-07
AT3G52430	-0.0157525	1.36837e-05		AT1G55020	0.0123639	0.000671261		AT5G53120	0.018664	0.000453031		AT5G26260	-0.00294122	0.00169095		AT3G08860	0.0084414	1.9099e-07
AT4G18250	-0.0459896	1.37274e-05		AT3G44990	-0.00990692	0.000671821		AT2G34500	-0.0424652	0.000460752		AT2G23060	-0.0065635	0.0017094		AT2G37690	-0.0043239	1.92741e-07
AT3G58620	0.0175567	1.38138e-05		AT2G19970	-0.014698	0.000674034		AT5G64080	0.0299316	0.000469286		AT5G39050	0.00524923	0.0017103		AT5G50820	-0.0080493	1.92741e-07
AT5G64250	0.0157169	1.40973e-05		AT2G33590	0.00707191	0.000674265		AT3G14550	-0.0338369	0.000475492		AT4G04800	0.00263884	0.00171207		AT3G62270	0.00717849	1.95967e-07
AT4G29905	0.0304373	1.43582e-05		AT1G30650	0.00838008	0.000678457		AT1G54970	-0.0403596	0.000483631		AT5G19940	0.00410682	0.00174486		AT1G01420	0.00665777	1.97275e-07
AT5G65230	0.0246026	1.44161e-05		AT2G20340	0.0163596	0.000689066		AT3G14620	-0.0467239	0.000483847		AT5G03210	0.00847656	0.00175719		AT2G26340	0.00682669	2.02075e-07
AT5G10050	-0.048499	1.44851e-05		AT1G78460	-0.0350865	0.000699917		AT2G06050	-0.0216145	0.000485936		AT2G25240	-0.008227	0.00176989		AT1G20990	0.00781633	2.02854e-07
AT5G16550	0.0146347	1.4696e-05		AT5G65210	-0.00876494	0.00071577		AT1G72370	0.0154745	0.000486351		AT1G75150	-0.00437448	0.00178897		AT5G20660	0.00303011	2.02854e-07
AT1G53580	0.0157347	1.47709e-05		AT4G15910	0.0148663	0.000723491		AT3G21680	0.0251678	0.000486355		AT5G23380	0.00477651	0.00178979		AT4G37540	0.00470079	2.04556e-07
AT4G13180	0.0236893	1.479e-05		AT5G60200	-0.00903795	0.000728077		AT1G33320	-0.105106	0.000486408		AT3G47770	-0.0100147	0.00180417		AT2G29120	0.0135156	2.0485e-07
AT3G09270	0.0223438	1.49636e-05		AT5G02350	-0.011506	0.000729279		AT4G22790	-0.0318192	0.000486408		AT5G44770	-0.0105429	0.00182846		AT1G24575	-0.0075742	2.09942e-07
AT1G67270	-0.0567225	1.50402e-05		AT3G25020	-0.0123313	0.000747384		AT4G25400	-0.0236542	0.000486408		AT2G45920	0.00351299	0.00184698		AT4G27400	0.00849331	2.15161e-07
AT1G15740	0.0143328	1.52962e-05		AT3G50700	-0.0105274	0.000748461		AT5G56550	-0.0791074	0.000486408		AT5G05440	-0.00353014	0.00184698		AT3G05155	-0.011465	2.1627e-07
AT2G17760	0.0130974	1.55834e-05		AT1G20190	0.0101695	0.00075045		AT5G65710	-0.0239993	0.000486408		AT1G26360	-0.0123467	0.0018494		AT1G64850	0.00581963	2.254e-07
AT5G19875	0.0291154	1.58532e-05		AT2G03440	-0.0110006	0.00075045		AT3G16870	0.0319782	0.000491237		AT5G18910	-0.0159415	0.00185242		AT3G51860	0.00620151	2.254e-07
AT1G66880	-0.0195908	1.5943e-05		AT1G23870	-0.013252	0.000753893		AT3G29430	-0.0596466	0.000494644		AT1G30500	0.00530896	0.00188067		AT1G63440	0.00414083	2.27537e-07
AT2G22970	0.0189505	1.68235e-05		AT2G24180	0.0110567	0.000758638		AT5G61430	-0.0345672	0.000495436		AT3G45710	-0.00481112	0.00188428		AT2G47950	0.0138352	2.28866e-07
AT2G32150	0.0198493	1.69131e-05		AT3G02030	-0.0101416	0.00076022		AT5G38450	-0.0646869	0.000498302		AT4G02770	0.00660054	0.00188428		AT4G28940	-0.00799048	2.37743e-07
AT2G41312	0.0491882	1.75289e-05		AT5G67430	0.00933168	0.000762079		AT2G42540	0.0844414	0.000503034		AT4G32880	-0.00329583	0.00188428		AT1G35515	-0.00832906	2.41075e-07
AT2G29450	0.0330665	1.79196e-05		AT5G54700	-0.0401738	0.00079456		AT1G66020	-0.034894	0.000504663		AT5G24780	-0.00413843	0.00188428		AT1G52220	0.00945391	2.41309e-07
AT4G01610	0.0167097	1.85743e-05		AT3G24300	-0.00965261	0.00079691		AT5G11540	-0.0322984	0.000508863		AT2G31180	0.00599395	0.00189758		AT4G36430	0.00669656	2.50629e-07
AT2G03240	0.0160467	1.8794e-05		AT4G28150	0.0196171	0.000797515		AT3G43790	-0.0305395	0.000515277		AT5G24930	0.00294086	0.00189758		AT2G26910	-0.00842525	2.59706e-07
AT1G29300	0.0187801	1.8819e-05		AT1G72150	-0.00740425	0.000799592		AT1G01620	-0.0279826	0.000529959		AT5G63270	-0.00875805	0.00190242		AT2G47400	0.00848206	2.59706e-07
AT2G30660	-0.0615955	1.8819e-05		AT3G12760	0.00498224	0.000799592		AT2G35585	0.0310619	0.000530223		AT5G62280	-0.00452789	0.0019197		AT5G58490	0.00425306	2.63292e-07
AT2G43670	0.0302189	1.8819e-05		AT3G46600	-0.00649187	0.000802226		AT5G11740	0.0265311	0.000534953		AT5G05270	0.00690734	0.00192512		AT2G05440	0.00808713	2.64616e-07
AT5G57610	0.0167599	1.8856e-05		AT4G16370	-0.0139026	0.000819941		AT3G45440	-0.0383509	0.000535616		AT1G53670	0.00361838	0.00193119		AT5G10130	0.00486083	2.64616e-07
AT4G14780	-0.0290275	1.88654e-05		AT1G02460	0.0234205	0.00083024		AT1G78290	-0.0491444	0.000543728		AT4G31000	0.00354013	0.00193119		AT1G32500	0.00364444	2.66807e-07
AT5G10770	0.0254026	1.88654e-05		AT2G18480	0.0157829	0.000831318		AT3G05020	0.0262478	0.000547037		AT5G06760	0.012195	0.00193119		AT4G04890	-0.00924016	2.6684e-07
AT4G05050	0.0141718	1.8884e-05		AT5G63850	-0.0162232	0.000831318		AT1G24280	0.0330069	0.000551852		AT5G45720	-0.0041367	0.00195092		AT4G25480	0.00719706	2.69209e-07
AT5G49890	0.0183141	1.89564e-05		AT3G26590	0.00962889	0.000836065		AT3G16070	-0.0345847	0.000555322		AT1G06690	0.00367475	0.00195197		AT1G63970	0.00515171	2.69312e-07
AT1G35250	0.0265399	1.96181e-05		AT5G61510	0.00807684	0.000836065		AT3G47040	-0.0294161	0.000555322		AT5G47770	-0.00209042	0.00196012		AT4G15150	0.00854676	2.70683e-07
AT1G08340	0.0212351	1.97651e-05		AT5G60530	0.0172151	0.000847858		AT2G38823	0.0579162	0.000558768		AT3G48200	0.0148035	0.00197034		AT3G12540	-0.00976284	2.74109e-07
AT4G14030	0.0134811	1.98233e-05		AT3G11050	0.0152934	0.000850823		AT1G49660	-0.0147411	0.000558972		AT5G03040	-0.00307785	0.00197499		AT1G77530	-0.0171595	2.74985e-07
AT1G74770	-0.0192726	1.99161e-05		AT5G64550	0.0104295	0.000855328		AT3G23510	-0.0568667	0.000558972		AT5G65683	-0.00380168	0.00197499		AT5G08790	-0.0033752	2.84227e-07
AT2G35710	-0.0298607	2.02388e-05		AT5G18860	-0.00997913	0.000856759		AT4G18040	0.0184245	0.000561685		AT5G57030	0.00482812	0.00201435		AT4G35250	0.00556069	2.84445e-07
AT2G28970	-0.0317627	2.07468e-05		AT1G66440	-0.024352	0.000859722		AT3G23790	0.023406	0.000568435		AT2G24580	-0.00362108	0.00202179		AT5G13630	0.00551451	2.85269e-07
AT4G01750	-0.0213783	2.12933e-05		AT1G48030	0.00633634	0.000870073		AT3G59140	-0.045144	0.000568435		AT5G01330	-0.00416118	0.00202179		AT3G26770	0.00631973	2.95496e-07
AT1G18100	0.0405787	2.14713e-05		AT1G50040	-0.0234068	0.0008825		AT5G45080	-0.0459036	0.000570771		AT5G39550	-0.00267776	0.00202179		AT5G23120	0.00605844	2.96042e-07
AT1G54575	0.0308145	2.15339e-05		AT1G74020	0.00879713	0.00090295		AT2G37250	0.0108901	0.000571639		AT5G37500	0.00301793	0.00202485		AT5G51520	0.0149748	3.01044e-07
AT2G21820	0.0526987	2.15339e-05		AT4G00430	0.00710679	0.000907308		AT1G50450	0.0445305	0.000577341		AT3G54310	0.00570122	0.00202638		AT4G27000	0.00309047	3.04319e-07
AT5G15180	0.0263203	2.16826e-05		AT3G48940	-0.0224569	0.000914976		AT5G22250	0.034134	0.000577341		AT5G64420	-0.00277836	0.00202638		AT5G14780	0.00870119	3.09078e-07
AT2G35210	0.0295699	2.19044e-05		AT2G21560	-0.00911114	0.000919379		AT1G50900	-0.070029	0.000581272		AT4G18570	-0.00363056	0.00203515		AT5G47240	-0.00601956	3.13887e-07
AT1G26270	-0.026303	2.22159e-05		AT3G47160	-0.00914395	0.000923713		AT1G66470	0.0239423	0.000581272		AT5G40910	0.00244776	0.00203515		AT5G22410	-0.0132525	3.17246e-07
AT1G30560	-0.0342245	2.25068e-05		AT3G07350	0.0107577	0.000927143		AT1G55260	0.0363238	0.000599029		AT4G12760	0.00379052	0.00205286		AT4G02360	0.00872297	3.21597e-07
AT4G14680	-0.018434	2.25068e-05		AT4G33740	-0.00923078	0.000927701		AT5G25140	-0.0462889	0.000608596		AT2G45750	-0.00276163	0.00206573		AT2G33790	0.0138816	3.24563e-07
AT3G11402	-0.0564963	2.26902e-05		AT1G07720	0.0211334	0.000929782		AT5G56380	0.0258016	0.000613691		AT5G27000	-0.00277777	0.00209278		AT2G43910	-0.00485847	3.24563e-07
AT4G19420	0.0215575	2.34781e-05		AT5G43450	0.0194625	0.000929782		AT1G14520	-0.0523713	0.000615227		AT2G06520	0.0056146	0.00209996		AT1G74470	0.00555794	3.33662e-07
AT1G21110	0.0313389	2.36587e-05		AT2G39700	-0.00632696	0.000936163		AT4G37250	-0.024468	0.000622517		AT2G03720	-0.00800735	0.00211527		AT3G46130	0.00697967	3.41028e-07
AT3G51830	0.0114408	2.37502e-05		AT4G25290	0.0107245	0.000936163		AT1G35780	0.0197054	0.000630435		AT5G09870	-0.00242221	0.00212207		AT4G20050	0.00803481	3.5066e-07
AT5G63160	-0.0297355	2.40546e-05		AT2G04090	0.0139424	0.000951597		AT1G72140	-0.0337044	0.000630435		AT5G46280	-0.00416989	0.00212207		AT4G21280	0.00803892	3.5066e-07
AT1G23330	0.0177017	2.41588e-05		AT5G58490	0.00596752	0.000957511		AT1G72870	-0.033075	0.000631621		AT1G61230	0.00572788	0.00212951		AT3G12110	-0.00501241	3.55341e-07
AT2G28860	0.0528594	2.42815e-05		AT5G52120	-0.0112611	0.000976308		AT3G50280	-0.0443866	0.000632923		AT1G76990	0.0026356	0.00212951		AT1G30110	0.0048331	3.55693e-07
AT3G30210	0.0545835	2.4894e-05		AT1G61130	-0.0255916	0.000987691		AT5G18170	-0.0231069	0.000632923		AT4G10770	-0.00375757	0.00213153		AT2G11225	-0.00478466	3.59372e-07
AT5G06930	0.0204046	2.56339e-05		AT5G67370	0.0141164	0.000987691		AT5G57655	-0.0252969	0.000632923		AT4G17460	-0.00230804	0.00213851		AT1G51110	0.00937169	3.60939e-07
AT1G51790	-0.0230685	2.58626e-05		AT1G80050	-0.0123741	0.000994991		AT3G21600	-0.0268216	0.000633159		AT3G12710	-0.00328648	0.00214999		AT1G47570	0.00581861	3.64147e-07
AT5G20470	-0.0372275	2.58771e-05		AT5G14590	0.00494856	0.00100746		AT1G72970	0.022998	0.000634101		AT2G19050	-0.00925569	0.00215334		AT3G04550	0.00845589	3.65773e-07
AT5G13870	-0.0247467	2.64975e-05		AT5G43400	0.00731086	0.00101402		AT1G21270	-0.0677332	0.000636612		AT3G10820	0.0033406	0.00216004		AT3G23190	-0.00552322	3.68841e-07
AT5G11160	-0.0341392	2.77149e-05		AT4G11560	0.00537194	0.00102136		AT1G44770	-0.0197974	0.000636883		AT2G26710	-0.00398149	0.00216026		AT5G65780	0.00385256	3.76904e-07
AT3G09925	0.0228716	2.79028e-05		AT2G43890	0.0474199	0.00102193		AT4G27450	-0.0620591	0.000642713		AT4G11600	0.00260414	0.00216352		AT3G56930	-0.00645225	3.77363e-07
AT4G27870	0.0123535	2.81486e-05		AT1G73310	-0.0113383	0.00102208		AT2G31680	0.0216408	0.000642743		AT1G55740	0.00329752	0.00216764		AT5G54980	0.00669442	3.78383e-07
AT1G27030	0.0167362	2.84254e-05		AT4G36410	-0.0210558	0.0010311		AT5G24040	-0.0834554	0.000642743		AT1G14600	0.00456018	0.00219992		AT1G10760	0.00498656	3.78438e-07
AT3G44190	0.0129163	2.87739e-05		AT4G36900	-0.0120438	0.00103218		AT1G11120	0.0388839	0.000644373		AT5G38610	-0.0061063	0.00224147		AT3G22850	0.00310478	3.80203e-07
AT5G16360	0.028453	2.89812e-05		AT5G11520	0.00683073	0.00103218		AT4G38160	-0.0326039	0.000645134		AT3G27340	0.00312167	0.00224226		AT4G37320	0.00528824	3.82313e-07
AT4G29690	0.0226419	2.943e-05		AT1G11540	-0.015664	0.0010362		AT2G33240	0.0347896	0.00064631		AT1G64355	0.00462805	0.00224814		AT3G27650	0.0107563	3.82483e-07
AT1G51800	-0.0232334	2.94654e-05		AT1G76990	-0.00836112	0.00103859		AT1G62660	-0.0307364	0.000650191		AT2G16700	0.00459474	0.00225915		AT1G65980	0.00581413	4.0948e-07
AT3G22200	0.0111241	2.94654e-05		AT5G14430	-0.0064059	0.0010386		AT3G22425	0.018821	0.000652766		AT3G45010	-0.00343854	0.00228047		AT1G62290	0.0140324	4.1402e-07
AT3G26720	0.0124125	2.94836e-05		AT2G19310	0.0117416	0.00107035		AT4G27745	-0.0314402	0.000652766		AT2G22970	-0.0032408	0.00230924		AT1G48630	-0.00424486	4.15956e-07
AT1G30110	-0.0235011	2.96717e-05		AT3G05150	-0.0196614	0.00107035		AT5G52310	0.0366668	0.000652766		AT5G62540	0.00285699	0.00233742		AT3G10300	0.00537313	4.26858e-07
AT1G60630	-0.0259992	2.96982e-05		AT3G45770	0.00663575	0.00107241		AT5G57070	-0.0203046	0.000652766		AT2G36200	-0.00278849	0.00238572		AT5G57040	0.00723154	4.34625e-07
AT3G50160	-0.0435438	2.97368e-05		AT4G17940	0.011133	0.00107663		AT3G52970	-0.103504	0.000655959		AT3G59280	0.00274958	0.00240983		AT5G37360	0.00622735	4.44551e-07
AT5G53850	-0.0105909	2.98445e-05		AT1G09932	0.0187568	0.00107758		AT3G48940	-0.0565486	0.000661935		AT4G01510	0.00651574	0.00240983		AT1G61480	-0.00910718	4.46683e-07
AT2G29490	0.0256361	3.01144e-05		AT4G30670	-0.0198064	0.00107758		AT5G07770	-0.0275417	0.000672015		AT4G34120	0.00353669	0.00242921		AT1G02205	0.00920659	4.57504e-07
AT1G21590	0.015133	3.04697e-05		AT1G17830	0.0194097	0.00108875		AT1G68360	0.0302638	0.000676023		AT1G66700	0.00779754	0.00243601		AT4G15393	0.00559885	4.57504e-07
AT5G02780	-0.023669	3.11847e-05		AT1G71330	0.0139562	0.0010952		AT5G63970	-0.0205307	0.000677737		AT3G16750	0.00448498	0.00243601		AT5G23840	-0.0091893	4.68635e-07
AT1G74020	0.014657	3.14518e-05		AT3G46490	-0.0227997	0.00109853		AT2G14080	-0.0772984	0.000681978		AT1G73220	0.00680059	0.00244523		AT5G67330	0.00428248	4.75955e-07
AT4G15100	0.0597798	3.19866e-05		AT3G51330	-0.0116666	0.00109853		AT2G42320	-0.0292187	0.000681978		AT1G05470	-0.0025641	0.00246049		AT1G49890	-0.00469866	4.80619e-07
AT3G02040	0.0198202	3.31026e-05		AT5G10130	0.00966226	0.00109853		AT5G20250	-0.0522888	0.000681978		AT5G19600	-0.00383168	0.00247052		AT2G29320	0.00868243	4.85955e-07
AT1G73810	0.0443369	3.3344e-05		AT1G20720	-0.0100456	0.00110216		AT4G33740	-0.0262654	0.000682024		AT1G33440	0.00501157	0.00247618		AT5G17760	0.00496643	4.90692e-07
AT3G14560	0.0324556	3.36239e-05		AT5G10300	0.00881703	0.00110216		AT2G32210	0.0489265	0.000685278		AT2G19170	-0.0032388	0.00250375		AT1G73885	0.00807543	4.91255e-07
AT3G26744	0.0231382	3.3667e-05		AT5G24920	-0.0303418	0.00110775		AT3G21420	0.0291047	0.000691004		AT5G54380	-0.00426325	0.00250375		AT5G62330	-0.0147823	4.9139e-07
AT5G42570	0.0108857	3.36874e-05		AT3G22760	-0.0132849	0.00112315		AT2G45340	0.0161517	0.000702997		AT4G00680	-0.0047687	0.00250425		AT5G21950	-0.00570546	5.06201e-07
AT3G15650	-0.0184104	3.37141e-05		AT5G37690	-0.00868496	0.00112315		AT5G61590	-0.0799848	0.000706383		AT3G59550	-0.00376859	0.00250704		AT1G03600	0.0113062	5.08899e-07
AT4G31330	0.0302606	3.41402e-05		AT3G56220	0.012659	0.00115096		AT2G41190	-0.0530054	0.000710979		AT3G08943	-0.00244024	0.00253447		AT3G09400	-0.0113126	5.28527e-07
AT3G57630	0.0150833	3.56277e-05		AT1G66700	0.0180217	0.00115489		AT3G20840	0.0223644	0.000712306		AT1G65370	0.00451266	0.00254458		AT5G62310	-0.00822512	5.38827e-07
AT4G15300	-0.0358552	3.63804e-05		AT3G01760	-0.0309622	0.00115824		AT2G04965	0.04408	0.000713684		AT5G06730	0.00518241	0.00256005		AT1G76010	-0.00215809	5.45444e-07
AT1G02920	0.0222515	3.69344e-05		AT4G16920	-0.0106987	0.00116772		AT2G02820	-0.0238179	0.000714434		AT5G43330	0.00365214	0.00256005		AT2G42270	-0.00519517	5.46996e-07
AT3G48000	0.00981557	3.69344e-05		AT1G64160	0.0573577	0.00116967		AT1G29600	-0.0890487	0.000719719		AT3G57420	-0.00304051	0.00256093		AT3G07070	-0.00947056	5.48002e-07
AT4G40070	-0.0374932	3.69344e-05		AT2G41475	0.00826675	0.00116967		AT3G52930	0.0141588	0.000719719		AT5G60930	-0.00278113	0.00257867		AT4G32850	-0.00363088	5.57026e-07
AT5G47870	-0.0181423	3.69344e-05		AT3G19000	0.00801564	0.00116967		AT3G54830	-0.179876	0.000719719		AT1G09750	-0.00755718	0.00262201		AT5G07020	0.00570453	5.60446e-07
AT5G51790	0.0337081	3.69344e-05		AT4G21400	-0.0117198	0.00116967		AT5G38020	-0.0313104	0.000723981		AT1G17030	-0.00680378	0.00267164		AT4G35000	0.00372023	5.61728e-07
AT1G21130	0.0255598	3.69546e-05		AT2G41190	0.0248677	0.00117786		AT2G36380	-0.0295766	0.000728812		AT2G45210	0.00406155	0.00267164		AT2G24260	0.00442431	5.63651e-07
AT3G25110	0.0123739	3.69546e-05		AT5G62960	-0.00964997	0.00119044		AT1G76470	-0.109104	0.000729411		AT3G01680	-0.00332919	0.00267164		AT4G16680	-0.00850699	5.64197e-07
AT4G10530	-0.0554291	3.7207e-05		AT3G14840	-0.00785687	0.00119998		AT5G14800	0.020258	0.000736248		AT5G25560	0.00228616	0.00268434		AT5G03210	0.0142641	5.64197e-07
AT5G38000	0.0315155	3.75571e-05		AT5G66310	0.00955469	0.00119998		AT5G26660	-0.0276737	0.000748299		AT1G48630	-0.00282897	0.00269934		AT5G52560	-0.0056062	5.64576e-07
AT3G52790	0.0257987	3.78428e-05		AT2G45470	-0.0096634	0.00120869		AT1G24050	0.0149875	0.000748993		AT2G35190	-0.00249428	0.00269934		AT1G03940	0.00943003	5.71578e-07
AT3G07350	0.0319039	3.78671e-05		AT5G23860	-0.0102329	0.00120869		AT4G30910	0.0222451	0.000750321		AT2G39470	0.0182691	0.00269934		AT5G16550	0.0054819	5.72284e-07
AT1G22360	0.0224365	3.79633e-05		AT5G41690	-0.0130901	0.00122016		AT4G09770	-0.0588143	0.000758128		AT3G51600	-0.00431765	0.00269934		AT1G47960	0.00839102	5.79908e-07
AT2G46450	-0.0289865	3.81632e-05		AT1G68830	0.00915003	0.00122683		AT2G43610	-0.0186877	0.000772813		AT4G17340	-0.00410355	0.00269934		AT1G14870	-0.00417192	5.93356e-07
AT5G17190	0.0109981	3.84034e-05		AT2G25900	-0.0225148	0.00122683		AT4G35090	-0.0146825	0.000773107		AT1G35350	-0.00621609	0.00271703		AT1G56110	-0.00426135	5.93559e-07
AT1G64400	-0.024696	3.92801e-05		AT5G57780	0.0188915	0.00122683		AT5G01330	-0.0310214	0.000773107		AT1G73850	0.0025053	0.00271703		AT4G18930	0.00506824	5.93559e-07
AT3G21670	0.0451086	3.94313e-05		AT1G35240	-0.0165122	0.00124069		AT1G54080	0.0153295	0.000773856		AT3G29810	0.00481237	0.00271703		AT4G21570	0.00402555	5.96972e-07
AT3G15540	0.022836	3.9911e-05		AT1G31170	0.0116901	0.0012425		AT1G55820	0.0242827	0.000782075		AT4G14385	0.00310796	0.00273596		AT1G05710	0.00512334	6.1225e-07
AT5G24380	0.0189474	3.99582e-05		AT2G45560	-0.0154809	0.0012425		AT4G15630	0.0412419	0.000784516		AT1G03600	0.00715577	0.00274096		AT1G17530	0.00501302	6.1225e-07
AT1G80110	0.0290819	4.00142e-05		AT1G12030	0.0387763	0.00124282		AT2G19050	-0.0658979	0.000786967		AT1G23310	0.00354749	0.00274699		AT1G31970	-0.00392793	6.1225e-07
AT3G16920	0.020397	4.09545e-05		AT2G17430	-0.0148882	0.00124733		AT4G16480	-0.0502946	0.000793046		AT1G16320	0.00329618	0.00275951		AT5G46410	-0.0049957	6.1225e-07
AT2G36530	-0.0100579	4.10665e-05		AT3G46700	0.0100592	0.00125011		AT3G46170	-0.0548267	0.000794618		AT1G17100	0.00566524	0.00275951		AT3G44200	-0.00341208	6.17568e-07
AT3G09220	0.0255861	4.18847e-05		AT4G35300	0.0100268	0.00125011		AT4G09500	-0.0425058	0.000797812		AT1G67980	0.00705557	0.00280066		AT1G24320	0.00726131	6.21108e-07
AT5G24230	-0.020188	4.22491e-05		AT5G62330	-0.024981	0.00126948		AT2G28960	-0.0252224	0.000798463		AT3G16810	-0.00291537	0.00281187		AT3G06050	0.00488623	6.3207e-07
AT1G45015	0.0288776	4.24577e-05		AT5G24660	0.0104093	0.00129039		AT5G41970	0.0192155	0.000798676		AT4G15120	0.00371555	0.00282054		AT2G18450	-0.0080785	6.36827e-07
AT1G59590	0.0227413	4.52008e-05		AT2G02800	-0.00727122	0.00129951		AT3G45710	-0.0280377	0.000807543		AT1G62780	0.00614241	0.00282362		AT4G21380	-0.0205551	6.43369e-07
AT5G62150	-0.033899	4.6492e-05		AT4G26880	0.0293678	0.00129955		AT5G14880	-0.0310258	0.000807543		AT5G40480	-0.00334003	0.00287546		AT2G43890	0.0160398	6.48735e-07
AT5G52060	0.0100562	4.65875e-05		AT2G01430	0.00957022	0.00130073		AT5G61250	-0.0305442	0.000807557		AT3G55330	0.00836593	0.00289272		AT1G67810	-0.00624889	6.5416e-07
AT2G38740	0.0178572	4.66764e-05		AT3G26220	0.0227196	0.00130516		AT2G06025	-0.0155135	0.000815548		AT2G42540	0.0114512	0.00290658		AT2G48080	0.00679424	6.62527e-07
AT1G54830	0.0186032	4.72835e-05		AT5G19110	0.0115195	0.00130516		AT4G18880	-0.0186121	0.000831679		AT5G24030	0.00201264	0.00291761		AT3G01670	-0.0066798	6.68867e-07
AT3G01690	-0.0177904	4.7291e-05		AT3G01510	0.0103033	0.00131501		AT5G25910	-0.0411167	0.000834937		AT3G63140	0.0113196	0.0029563		AT1G67300	0.00366344	6.68885e-07
AT2G18450	-0.0278392	4.93759e-05		AT2G39710	0.0130329	0.00131825		AT1G19770	-0.0328185	0.000844076		AT5G15960	0.0108195	0.0029563		AT5G60930	-0.00561423	6.69354e-07
AT4G12030	-0.0212302	4.96897e-05		AT1G49470	-0.00843013	0.00132335		AT3G10520	0.041297	0.000855042		AT4G37790	0.00392738	0.00296352		AT4G13950	0.00592536	6.74949e-07
AT3G18600	-0.0149603	4.96968e-05		AT5G40590	-0.027893	0.00132335		AT3G14390	0.0142447	0.000857567		AT5G59800	0.0042325	0.00296717		AT3G53470	0.00996798	6.7551e-07
AT5G37980	0.0323286	5.01258e-05		AT2G21610	0.0246531	0.00132531		AT5G06550	0.0200429	0.000867449		AT1G72490	0.00279403	0.00297929		AT1G44575	0.0116465	6.81245e-07
AT3G03380	-0.0175722	5.04215e-05		AT5G11920	-0.0139263	0.00132531		AT5G58590	0.0155391	0.000876673		AT2G47530	-0.00494569	0.00300639		AT2G16720	0.00383089	6.82175e-07
AT5G47530	0.0275068	5.17773e-05		AT4G02100	-0.00932687	0.00133367		AT4G37930	-0.0186704	0.000876926		AT1G77530	-0.00523326	0.00301234		AT4G15563	0.00813082	6.8509e-07
AT5G46180	0.0147773	5.2027e-05		AT2G28270	-0.0300691	0.00134211		AT3G63170	0.0250443	0.000880791		AT2G47260	0.00438896	0.00301411		AT5G57150	0.00283467	6.93504e-07
AT3G27960	0.0149577	5.23804e-05		AT1G52560	0.0211084	0.00134541		AT3G04220	-0.0543859	0.000884425		AT3G56380	-0.0175967	0.00301414		AT4G22380	0.00521632	7.17531e-07
AT1G63010	0.0124261	5.24016e-05		AT3G61830	-0.00879644	0.00134806		AT2G45550	-0.0641008	0.000905116		AT1G62710	0.0032615	0.00302056		AT2G41810	0.0184835	7.18004e-07
AT1G27470	-0.0132295	5.40391e-05		AT3G13810	-0.00864157	0.00136556		AT1G23710	-0.02714	0.000907275		AT3G14210	0.0148269	0.003049		AT2G40750	-0.0141168	7.2523e-07
AT1G51270	-0.0221104	5.52888e-05		AT3G21720	0.0276069	0.00140538		AT3G32047	-0.0750749	0.000910562		AT3G14990	0.00231929	0.00306421		AT5G48070	-0.00585773	7.41205e-07
AT4G15233	0.0241006	5.60106e-05		AT5G43940	0.0045534	0.00140944		AT1G63470	0.0214301	0.000911227		AT5G23920	0.00326036	0.00306732		AT5G36160	0.00340033	7.42069e-07
AT3G23190	-0.0240865	5.60629e-05		AT5G48360	-0.00678731	0.001425		AT2G30400	-0.0574618	0.000914696		AT4G32810	-0.00832495	0.00309348		AT1G73680	0.0059243	7.58133e-07
AT3G15350	0.0226158	5.67278e-05		AT1G11720	0.010462	0.00143622		AT5G14130	-0.0362997	0.000917286		AT1G67120	-0.00435071	0.00310173		AT3G11410	0.00302063	7.67725e-07
AT5G01810	-0.017746	5.67278e-05		AT4G38470	-0.0112227	0.00143943		AT1G17340	-0.0233558	0.000920404		AT4G32320	0.00427037	0.00311191		AT1G48480	-0.00461018	7.73392e-07
AT1G54100	0.0161507	5.77983e-05		AT2G22560	0.00941958	0.00144115		AT3G45130	-0.0980818	0.000933437		AT4G22890	0.00377766	0.00311399		AT3G63410	0.00387674	7.85828e-07
AT5G60980	-0.00775047	5.80276e-05		AT3G50760	0.0111954	0.00144915		AT3G26460	-0.0379719	0.000958937		AT1G60750	0.00416289	0.0031266		AT4G34600	0.00391502	7.87444e-07
AT5G11540	0.0196252	5.81361e-05		AT1G27670	-0.0151461	0.00145381		AT2G41660	-0.0243133	0.000960748		AT2G38400	0.0034255	0.00312704		AT1G08650	0.00591272	7.89973e-07
AT1G32540	-0.0606342	5.86429e-05		AT4G37235	-0.0284217	0.00146173		AT1G12560	0.0238844	0.000970258		AT3G11100	0.00330837	0.00315881		AT1G65840	-0.00352401	7.9576e-07
AT1G66020	0.0201814	5.86429e-05		AT3G19960	0.00936769	0.00146522		AT1G67870	-0.031416	0.000972486		AT5G23840	-0.00504892	0.00316861		AT5G01840	0.00555654	7.9576e-07
AT3G55940	0.0294823	5.86524e-05		AT5G24300	0.00737067	0.00147027		AT1G22980	0.041743	0.000972536		AT3G11700	-0.00261888	0.00317131		AT2G43480	-0.00919321	7.97943e-07
AT4G25090	-0.0210847	5.93165e-05		AT4G23500	0.00904123	0.00148952		AT2G36490	-0.0263994	0.000972536		AT5G60430	0.00362242	0.00317131		AT1G45474	0.00993691	8.00585e-07
AT4G16750	0.0373526	5.96452e-05		AT3G20500	0.00631987	0.00149288		AT5G24910	-0.0370482	0.000972536		AT1G63300	-0.0037596	0.00318157		AT1G70170	-0.00757767	8.1847e-07
AT5G26300	-0.0335961	5.97518e-05		AT2G01470	0.00477927	0.00150094		AT5G42580	-0.0890868	0.000972536		AT2G17230	-0.0036861	0.00318157		AT4G05530	0.00382266	8.21789e-07
AT3G13600	0.0177949	6.08305e-05		AT3G14060	0.0166569	0.00151594		AT5G25110	-0.0417199	0.000975434		AT2G29750	-0.00413471	0.00318157		AT1G22530	-0.00933851	8.32055e-07
AT5G67030	0.0183231	6.18124e-05		AT1G67920	0.0129423	0.00151824		AT4G01070	-0.0153389	0.000976903		AT5G17820	-0.00433727	0.00320725		AT5G12270	-0.00805343	8.36085e-07
AT5G47640	0.0244127	6.29639e-05		AT5G58360	-0.025151	0.00156317		AT4G17680	-0.071549	0.000977528		AT5G06150	-0.00251116	0.00322874		AT1G20450	0.00452406	8.40361e-07
AT4G30960	0.0124306	6.3315e-05		AT3G59050	0.00662721	0.00158363		AT5G54540	-0.0163985	0.00097964		AT1G60630	-0.00551542	0.00323392		AT4G36900	-0.00617522	8.73585e-07
AT1G51690	-0.0127642	6.4093e-05		AT4G01610	0.00991261	0.00159185		AT5G63440	0.019951	0.00097964		AT4G36120	-0.00493271	0.00323392		AT1G71330	0.0102845	8.74347e-07
AT5G04860	-0.0136777	6.46893e-05		AT3G05190	0.0120516	0.00159245		AT1G13100	-0.0313039	0.00098186		AT2G37200	0.00506987	0.00328038		AT5G59700	0.00404867	8.74347e-07
AT5G13550	0.0135332	6.48293e-05		AT4G38810	0.00790029	0.00161858		AT5G15410	-0.0261074	0.000991496		AT4G20230	-0.00363234	0.00328071		AT4G14430	0.0041051	8.7933e-07
AT4G18340	-0.0210125	6.61147e-05		AT4G11320	-0.0099243	0.00162069		AT5G36150	-0.0412965	0.000993802		AT4G28080	0.00479163	0.00330003		AT3G11930	0.00673449	8.90654e-07
AT2G43100	-0.0223552	6.61638e-05		AT3G50290	0.0302288	0.00163925		AT5G40800	0.0384206	0.00099661		AT2G18160	0.0027512	0.00330612		AT4G13010	0.00487913	8.90654e-07
AT5G04960	0.0204919	6.61638e-05		AT5G65750	0.00881512	0.00167158		AT2G42650	0.0299967	0.000998759		AT5G63810	-0.00317334	0.00330612		AT3G15810	0.00376587	8.99822e-07
AT1G09560	-0.0173339	6.66133e-05		AT4G37180	0.00695909	0.00168459		AT1G07550	-0.067457	0.000999462		AT1G56280	0.00334445	0.0033083		AT5G56870	-0.00699557	8.99822e-07
AT5G53460	-0.0164287	6.67676e-05		AT4G21760	-0.0245775	0.00169763		AT1G73280	-0.0312254	0.00100087		AT2G24270	0.00478821	0.0033083		AT2G27500	-0.00486609	9.09221e-07
AT5G51460	-0.0238657	6.69045e-05		AT4G01740	-0.00721014	0.00170651		AT5G47530	-0.0229967	0.00100769		AT1G04730	-0.00328671	0.00331123		AT4G30830	0.0106195	9.09221e-07
AT4G26770	0.0371329	6.70157e-05		AT4G35720	0.0130945	0.00170651		AT4G24480	-0.0219461	0.00102295		AT2G42790	0.00227997	0.00331123		AT2G22970	-0.00388912	9.11506e-07
AT5G12340	-0.029939	6.80643e-05		AT1G11380	-0.0135288	0.001741		AT1G64190	0.0242674	0.00102983		AT2G31310	-0.00581124	0.00334154		AT3G45070	-0.0062158	9.11902e-07
AT1G11840	0.0159293	6.8723e-05		AT3G15630	-0.0260776	0.00176708		AT2G17220	-0.0180831	0.00102983		AT5G48500	0.00250344	0.00334154		AT2G28550	0.00417248	9.22608e-07
AT3G44620	0.026923	6.89717e-05		AT2G47260	0.00715472	0.00178116		AT3G01590	0.0137642	0.00103442		AT1G25530	0.00478837	0.00338316		AT2G39340	-0.00442911	9.52046e-07
AT2G03200	0.0199653	6.91439e-05		AT5G39970	-0.0116848	0.00181711		AT2G30620	0.0139006	0.00104387		AT5G46850	0.00381072	0.00338316		AT1G66830	0.0107874	9.59849e-07
AT4G24310	-0.025734	6.91769e-05		AT1G59590	-0.00998096	0.00183		AT5G67260	0.0178406	0.00104433		AT2G33250	0.00404394	0.00339229		AT5G60540	0.00431702	9.59849e-07
AT1G20030	0.0412724	6.93046e-05		AT4G21326	-0.0144753	0.00183		AT3G01750	-0.0428231	0.00104632		AT2G05310	0.00733327	0.0033977		AT4G13360	0.00366614	9.64742e-07
AT5G23903	-0.0786341	6.9601e-05		AT4G22590	0.00911011	0.00183		AT3G57780	-0.0237379	0.00104632		AT1G14270	0.00500465	0.00341177		AT4G32870	0.00616288	1.01746e-06
AT1G62380	-0.0179566	6.96868e-05		AT5G09440	-0.0084354	0.00183		AT4G10380	0.0201165	0.00106165		AT4G22610	-0.00452983	0.00342763		AT1G67920	0.00849559	1.02168e-06
AT5G61430	0.0280339	6.97456e-05		AT5G19600	-0.0125852	0.00183		AT2G28120	-0.0316425	0.00106571		AT3G54470	-0.00283784	0.00344634		AT4G39030	-0.00764289	1.0235e-06
AT2G40250	0.0641184	7.03879e-05		AT4G18375	-0.0146693	0.00184493		AT1G07510	0.0120814	0.00106712		AT4G33450	0.00417067	0.00346403		AT5G25560	-0.0030424	1.04017e-06
AT1G10470	0.0193991	7.10181e-05		AT5G48320	-0.020669	0.00185619		AT2G30600	-0.027624	0.00107966		AT2G41970	-0.00385495	0.00348873		AT1G76930	0.00865012	1.06441e-06
AT3G19400	0.013508	7.15554e-05		AT2G39570	-0.0120542	0.00187138		AT2G34850	0.0327788	0.00107966		AT4G19450	0.00303916	0.00348873		AT3G27070	0.0071482	1.07114e-06
AT3G46370	-0.0722114	7.30702e-05		AT3G12800	0.00849731	0.00187415		AT2G38180	0.0212898	0.00107966		AT5G58750	-0.00613643	0.00349353		AT1G03970	0.00723337	1.07213e-06
AT1G22290	0.0585631	7.32703e-05		AT3G21710	0.00573322	0.00187415		AT4G27460	-0.0926807	0.00109566		AT5G64040	0.00742827	0.00351059		AT1G72970	-0.0057671	1.07213e-06
AT4G24140	0.0177905	7.34499e-05		AT3G47675	-0.0118126	0.00190498		AT3G06990	-0.0505287	0.00110567		AT5G08185	0.00629429	0.00354155		AT2G21550	0.00561249	1.07806e-06
AT3G49780	0.0273612	7.43761e-05		AT1G51440	0.018172	0.00190863		AT3G19390	-0.0277566	0.00111345		AT2G31230	0.00616071	0.0035586		AT5G11610	0.00922899	1.08566e-06
AT4G30190	-0.0115018	7.46788e-05		AT1G35320	0.00600862	0.00191075		AT1G32580	0.021931	0.00112076		AT3G24550	-0.0017514	0.00356649		AT2G33630	0.00340787	1.10271e-06
AT1G59940	0.0256469	7.47901e-05		AT2G38870	0.0226941	0.00191075		AT3G49560	0.0196186	0.00112076		AT5G49270	-0.0045184	0.00356649		AT5G65320	0.00970578	1.12098e-06
AT5G49990	0.0124218	7.59199e-05		AT2G39350	0.0103191	0.00191153		AT3G11010	-0.0302869	0.0011251		AT1G44750	0.00248255	0.00357546		AT1G65310	-0.00804387	1.12956e-06
AT5G46780	-0.0205515	7.64877e-05		AT2G39050	0.00930008	0.00191447		AT5G37770	0.0196635	0.00113575		AT3G13784	0.00557496	0.00357546		AT1G75680	-0.00410308	1.12956e-06
AT3G50010	-0.0259391	7.71982e-05		AT5G65780	0.00566012	0.00192235		AT5G20160	0.0246587	0.00113862		AT2G46495	0.00415761	0.00358552		AT4G21410	-0.0048528	1.12956e-06
AT5G03370	0.0229323	7.74837e-05		AT5G61440	-0.0263839	0.0019278		AT4G34930	-0.0561011	0.00114511		AT3G14780	0.00431411	0.00359157		AT4G22930	0.00349627	1.12956e-06
AT5G41280	-0.0341359	7.88499e-05		AT3G09290	-0.0177579	0.00194328		AT4G29510	0.013741	0.00115703		AT1G11580	-0.00281073	0.00361974		AT5G05145	0.0223987	1.12956e-06
AT3G57290	-0.0114226	7.92654e-05		AT2G32270	0.0100308	0.00196331		AT1G07780	0.0216195	0.0011732		AT1G07370	-0.00284386	0.00374075		AT1G17020	0.00671856	1.13527e-06
AT5G54710	-0.0324946	8.0526e-05		AT2G43500	0.00547432	0.00196331		AT1G23890	0.0213915	0.00117951		AT3G56290	0.00398971	0.00374075		AT5G08380	0.00579839	1.15682e-06
AT3G16030	0.0227618	8.08858e-05		AT1G26920	0.0079733	0.00198493		AT5G10900	-0.0271468	0.0011979		AT4G37030	0.00324681	0.00377972		AT1G11260	-0.00500179	1.16698e-06
AT2G29980	-0.0146854	8.11525e-05		AT3G32040	-0.0178427	0.00199679		AT1G21550	-0.0715513	0.00120125		AT3G03990	0.00301912	0.00382883		AT2G41120	0.0135775	1.20047e-06
AT5G41290	-0.0285834	8.11525e-05		AT3G11520	-0.00948491	0.00201692		AT4G05390	0.0229485	0.00120497		AT5G60730	-0.00438537	0.00382883		AT5G62140	0.0120419	1.20727e-06
AT1G56220	0.020503	8.40643e-05		AT1G75540	-0.00788277	0.00203224		AT3G06020	0.0264434	0.00121088		AT2G38430	0.00479746	0.00391105		AT3G47510	0.00811761	1.21084e-06
AT3G61990	0.00906136	8.43451e-05		AT5G13820	0.00669251	0.00206475		AT1G61180	-0.0333994	0.00122108		AT5G52870	0.00382887	0.0039131		AT2G18570	0.00393683	1.22589e-06
AT2G03720	0.0233348	8.44948e-05		AT3G26922	-0.0127305	0.00207794		AT5G07995	0.0992801	0.00122389		AT5G64840	0.00329059	0.00396586		AT2G45470	-0.00519384	1.27021e-06
AT4G14440	0.0279085	8.55796e-05		AT5G39240	0.0136656	0.00208251		AT3G29635	-0.0783987	0.00123562		AT1G79150	-0.00278415	0.00397375		AT5G39050	0.00567218	1.31635e-06
AT3G10710	0.0218927	8.59564e-05		AT1G62540	0.0171706	0.00209406		AT2G03240	-0.0158055	0.00125637		AT3G28200	-0.00299918	0.00402246		AT5G55170	0.0065865	1.31708e-06
AT3G02620	0.033841	8.63082e-05		AT3G51895	0.0257384	0.00209406		AT5G54970	0.02097	0.00125809		AT4G26530	0.0371359	0.00402246		AT3G02730	0.00547337	1.31977e-06
AT5G38030	0.0239478	8.64213e-05		AT4G25433	0.0302401	0.00209406		AT5G46050	0.0585302	0.00125976		AT1G22750	0.00250344	0.00409763		AT2G01900	-0.01417	1.33057e-06
AT2G42840	-0.027001	8.65612e-05		AT3G08590	0.00654474	0.00210569		AT2G32150	-0.0361075	0.0012603		AT1G26770	0.00476946	0.00411545		AT2G46495	-0.00866737	1.33973e-06
AT1G72300	-0.0220334	8.73191e-05		AT2G39890	-0.00623349	0.00212094		AT1G18170	-0.067301	0.00127088		AT5G10180	-0.00331718	0.00411545		AT5G48360	-0.00553928	1.36408e-06
AT4G24620	-0.0102749	8.89394e-05		AT4G34580	0.0112632	0.00212856		AT1G49960	-0.0345547	0.00127269		AT1G76090	-0.00244224	0.00413598		AT5G64130	0.00676384	1.37488e-06
AT4G29270	0.0263145	9.00329e-05		AT3G02830	0.00920551	0.00213999		AT3G54720	-0.0205112	0.00127298		AT4G31860	0.00213272	0.00413598		AT1G09310	0.0167145	1.38136e-06
AT2G44370	-0.0246108	9.19101e-05		AT4G13010	0.00665261	0.00217476		AT1G53680	-0.0352455	0.00128274		AT1G61660	0.00229003	0.00415217		AT1G71020	-0.0043614	1.38136e-06
AT3G21750	0.0290808	9.24703e-05		AT5G64330	-0.00593895	0.00218316		AT5G25475	0.0331782	0.00128274		AT2G21195	0.00514872	0.00416181		AT1G60810	-0.00377965	1.38941e-06
AT4G26050	-0.0258144	9.39073e-05		AT1G75500	-0.00774242	0.00222502		AT5G16040	0.0160651	0.00128386		AT3G04420	0.00428869	0.00416583		AT1G26560	0.0107358	1.39921e-06
AT5G59490	0.0304563	9.41347e-05		AT1G78820	-0.0371066	0.00222638		AT1G20840	-0.0181741	0.00128528		AT1G80300	0.00200613	0.00421207		AT4G25410	-0.0100932	1.39921e-06
AT3G03650	0.0213154	9.41612e-05		AT5G24890	-0.0123406	0.00222746		AT2G18620	-0.0736573	0.00128528		AT3G52470	-0.00204951	0.00423192		AT5G49780	-0.00811708	1.39921e-06
AT2G35920	-0.0128348	9.43858e-05		AT2G24720	-0.0141161	0.00222984		AT5G18840	0.028964	0.00128879		AT3G01470	0.00268336	0.00423619		AT5G49160	-0.00315454	1.41396e-06
AT5G57490	-0.0101563	9.44646e-05		AT5G52260	-0.0165247	0.00223839		AT5G47980	-0.0341414	0.00129562		AT1G29910	0.0144079	0.0042768		AT2G16970	-0.00846772	1.42813e-06
AT1G44160	0.0194149	9.48722e-05		AT3G47780	-0.00623015	0.00224853		AT4G09300	-0.036882	0.00129749		AT1G60050	-0.0109071	0.00428205		AT1G07080	0.00370259	1.43557e-06
AT5G38020	0.0254025	9.48722e-05		AT2G43820	0.00836241	0.00227035		AT2G04955	0.0466616	0.00130162		AT3G12610	-0.00249486	0.00430708		AT2G37200	0.010219	1.44119e-06
AT2G24710	-0.0426654	9.5775e-05		AT5G25190	0.0141344	0.00227035		AT1G24420	-0.0699129	0.00130324		AT4G00040	0.0037094	0.00430948		AT1G16310	0.00419622	1.44208e-06
AT4G17460	-0.0161417	9.71317e-05		AT1G21130	0.018688	0.00229844		AT1G32700	-0.0234625	0.00130901		AT2G29620	-0.0072019	0.0043139		AT5G28490	0.0112078	1.45972e-06
AT5G10510	-0.0224825	9.97852e-05		AT1G76470	0.0197406	0.00229844		AT1G74680	-0.0329878	0.00131692		AT5G06410	0.00513721	0.0043165		AT4G32720	-0.00445962	1.49556e-06
AT2G40460	0.0269678	0.000103451		AT5G22860	0.0163487	0.00229844		AT5G65070	0.044073	0.0013203		AT4G24780	-0.00313933	0.00432108		AT5G19390	-0.00340341	1.50575e-06
AT4G11610	-0.0234132	0.000106664		AT5G54370	0.0276448	0.00232329		AT5G39110	0.0519317	0.00132896		AT3G44990	-0.0030602	0.00432377		AT1G55675	0.00918524	1.51837e-06
AT4G22080	0.0245288	0.000106914		AT3G20015	-0.00910086	0.00232808		AT1G29660	0.0295508	0.00133135		AT1G35330	-0.00416495	0.00432437		AT5G24800	0.0059113	1.56966e-06
AT2G39890	0.0171131	0.000108469		AT1G76800	0.0150835	0.0023303		AT1G66800	-0.0334957	0.00133603		AT5G38430	0.0298941	0.00432661		AT3G45130	-0.0201003	1.5798e-06
AT5G02020	0.0345819	0.000109654		AT3G56130	-0.00616639	0.00234732		AT3G25560	-0.0154292	0.00133603		AT1G23760	-0.00410701	0.00437442		AT2G43535	0.00510813	1.59611e-06
AT1G58360	0.0187776	0.000112539		AT5G40990	0.0373567	0.00240076		AT1G21000	-0.0285555	0.00135124		AT2G40130	-0.00429182	0.00437442		AT2G18600	0.00668319	1.60363e-06
AT5G01740	-0.0447646	0.000113159		AT3G61260	-0.011805	0.0024433		AT3G16770	0.0401578	0.0013517		AT5G43260	0.0037127	0.00437442		AT1G65860	-0.0160059	1.60662e-06
AT2G46280	-0.00851991	0.000115081		AT1G55990	-0.00935458	0.00246599		AT1G48510	0.0284484	0.00135623		AT2G43040	-0.00405019	0.00438666		AT2G43140	-0.0184426	1.6176e-06
AT5G55400	0.0187887	0.000115368		AT2G45960	0.00718895	0.00248146		AT2G31540	-0.0412076	0.00135623		AT3G14840	-0.00311344	0.00441309		AT1G53560	0.00920484	1.61805e-06
AT1G13260	-0.0217726	0.000115408		AT3G14720	0.00571452	0.00248146		AT3G57450	0.0277545	0.00137902		AT1G10200	-0.00200502	0.0044262		AT2G34500	-0.00616421	1.61805e-06
AT5G15960	0.0652443	0.000116231		AT3G11390	-0.0415451	0.00249832		AT4G39900	0.0195387	0.00137902		AT4G15390	-0.00402452	0.00451489		AT3G54770	-0.00444463	1.63795e-06
AT1G48440	0.0133877	0.00011624		AT5G51050	0.0077317	0.00249832		AT4G31840	0.0223844	0.00138981		AT5G56160	0.00373786	0.00453478		AT4G04210	0.00330534	1.67248e-06
AT1G67710	0.0194966	0.000117156		AT5G62020	0.0117163	0.00249892		AT1G20670	0.0146564	0.0013905		AT1G30110	0.00341514	0.00454511		AT2G02020	-0.00461331	1.70009e-06
AT2G38250	0.0410002	0.000119496		AT2G21130	0.0170811	0.00250444		AT4G14110	0.0202303	0.0013905		AT1G32060	0.0107175	0.00454511		AT4G10380	0.0050164	1.70048e-06
AT3G12520	0.0183395	0.00011957		AT2G38460	-0.00992841	0.00251098		AT3G55700	0.0677869	0.00139255		AT5G43440	0.00515675	0.004553		AT3G46930	-0.00525075	1.72425e-06
AT1G03700	0.0439425	0.000119864		AT2G40230	-0.0117408	0.00253727		AT2G04100	-0.0196156	0.00139882		AT2G37410	0.00219828	0.00456261		AT3G45770	0.00332859	1.7266e-06
AT4G15215	0.0235032	0.000120541		AT3G01890	-0.0113466	0.00254365		AT4G33120	0.0297013	0.00139882		AT1G73130	0.00273383	0.00458465		AT2G43540	0.00894979	1.73109e-06
AT1G29660	-0.0268446	0.000121966		AT1G75400	0.00532244	0.00258658		AT3G29250	-0.0194494	0.00140024		AT5G03190	0.00315919	0.00458465		AT1G49700	0.0108588	1.74517e-06
AT3G29200	-0.0151688	0.000122893		AT2G18370	0.0114876	0.00265053		AT2G18440	0.0136535	0.00140867		AT2G32090	0.00355541	0.00458849		AT1G68680	0.00473993	1.74644e-06
AT4G19200	0.0169284	0.000122922		AT5G28630	-0.0306614	0.00265566		AT1G03940	0.0317434	0.0014437		AT3G25920	0.00284847	0.00458849		AT5G19530	-0.00501725	1.76669e-06
AT5G57900	0.0147431	0.000124688		AT4G34350	0.00632526	0.00265954		AT3G19930	-0.0289696	0.0014437		AT4G25170	0.00286136	0.00458849		AT1G17300	-0.0131053	1.80541e-06
AT1G13540	-0.0365329	0.0001273		AT3G12320	0.00921534	0.00267835		AT1G33170	-0.0247214	0.00144426		AT5G10380	-0.0158667	0.00458849		AT4G30060	-0.00488912	1.84367e-06
AT1G56145	-0.01548	0.000127563		AT1G72416	-0.0193358	0.00270572		AT5G40880	0.0235652	0.00144431		AT5G62150	0.00573923	0.00458849		AT1G05150	-0.00454946	1.85836e-06
AT4G22240	0.0190889	0.000128302		AT3G01420	0.0127523	0.00270572		AT4G14650	-0.025074	0.00144458		AT1G42970	0.0108448	0.00461508		AT1G08980	0.00719679	1.90491e-06
AT3G15240	-0.0163396	0.000132386		AT5G52640	0.0141944	0.00270572		AT1G23160	-0.0511912	0.00147062		AT2G41820	-0.00269686	0.00462492		AT1G48450	0.00461815	1.94347e-06
AT5G23980	-0.0698886	0.000136483		AT1G33440	0.0139982	0.00271044		AT2G47450	-0.0360365	0.001487		AT4G36530	0.00352207	0.0046401		AT1G68260	0.00621713	1.95713e-06
AT4G23670	0.030079	0.000137489		AT4G31420	0.00498118	0.00272804		AT2G18050	-0.0432186	0.00149105		AT2G22660	-0.00268904	0.0046479		AT5G52810	0.00424354	1.95929e-06
AT5G13200	0.0200386	0.000137774		AT1G23850	-0.00966393	0.0027338		AT5G13150	-0.0334657	0.00149105		AT3G06210	-0.00321829	0.00465571		AT5G14580	-0.00637132	2.09726e-06
AT1G79520	0.0217935	0.000138343		AT5G42146	0.0119562	0.00274247		AT5G66820	0.0250949	0.00149105		AT5G48530	0.004351	0.00466607		AT1G27530	0.00542012	2.11294e-06
AT4G09500	0.0274404	0.000138343		AT1G64940	0.0124732	0.00276525		AT5G09980	0.0312334	0.00151754		AT1G44900	-0.00376596	0.00473032		AT5G64410	-0.00533716	2.11294e-06
AT5G41810	0.0187634	0.00013852		AT1G05810	-0.0155215	0.00277177		AT1G53130	0.0811007	0.00152646		AT1G65000	0.00301136	0.00473032		AT1G20900	0.0043358	2.11472e-06
AT3G01490	-0.0510089	0.000140837		AT1G23740	0.0190193	0.00277177		AT1G13500	-0.0544418	0.00153973		AT3G04720	0.00406947	0.00474523		AT2G24720	-0.0083219	2.13928e-06
AT5G04600	-0.0125771	0.000141292		AT2G01850	0.0075146	0.00277177		AT5G07990	0.0730711	0.00153973		AT3G51680	-0.00655699	0.00474772		AT1G53280	0.00368791	2.14195e-06
AT1G44790	0.0175401	0.000142092		AT2G32960	0.00949936	0.00278952		AT5G51970	-0.0245516	0.00154019		AT4G20830	0.00964744	0.00477301		AT4G02970	0.0141699	2.1429e-06
AT4G39000	0.0507765	0.000146229		AT5G51550	-0.00870424	0.00278952		AT1G16300	0.0190266	0.00154375		AT3G29240	0.00334995	0.00481254		AT5G60760	0.00722819	2.15265e-06
AT3G27770	-0.0300291	0.000148184		AT4G16640	-0.0159823	0.00280722		AT5G12470	0.0119692	0.00155158		AT1G03040	0.00216454	0.00483189		AT3G46880	-0.0191495	2.16154e-06
AT3G52450	-0.0250214	0.000150569		AT4G36920	-0.00746575	0.00281501		AT1G06400	-0.0163729	0.00156803		AT2G25980	-0.00270434	0.00483189		AT2G07050	-0.00468164	2.17059e-06
AT1G06160	-0.0429121	0.000150784		AT5G17990	0.0069138	0.00284393		AT5G46600	0.0261517	0.00158822		AT4G02930	-0.00238934	0.00483189		AT5G58750	-0.0102314	2.17189e-06
AT5G54510	0.0152147	0.000151048		AT3G15670	0.0657073	0.00286502		AT1G22150	0.0505106	0.00159053		AT4G23070	-0.0101448	0.00483189		AT4G16370	-0.00671391	2.17279e-06
AT3G57150	-0.00988564	0.000154647		AT5G01600	0.0136734	0.00286928		AT3G08770	0.0442607	0.00159161		AT3G01200	0.00958837	0.00483736		AT5G19240	-0.0053402	2.17279e-06
AT5G02350	-0.0276862	0.000154647		AT3G59710	0.0202885	0.00286963		AT4G25835	-0.0315803	0.00159503		AT1G60950	0.00472753	0.0048617		AT3G63160	0.0137581	2.18462e-06
AT1G53635	-0.0285574	0.000156308		AT2G36950	-0.0123848	0.00287861		AT3G01060	-0.037882	0.00159716		AT3G06760	0.00252754	0.0048673		AT5G38550	0.00607853	2.2324e-06
AT1G78000	-0.0197113	0.000156308		AT5G65020	0.00703609	0.00288802		AT5G52320	-0.0647847	0.00160709		AT5G38520	0.00798264	0.0048912		AT1G19900	-0.0118386	2.23268e-06
AT5G67230	0.0393147	0.00015687		AT4G03210	-0.013699	0.00288904		AT5G66270	0.0399101	0.00161442		AT4G25000	-0.0109446	0.00490006		AT2G38540	0.00674718	2.23773e-06
AT4G29010	0.00765966	0.000160375		AT1G07430	0.0511311	0.0029003		AT1G08520	-0.0217996	0.00162214		AT2G17650	-0.00415994	0.00491176		AT4G27640	-0.00307107	2.25761e-06
AT2G03260	-0.0332103	0.000160462		AT5G59080	-0.0311691	0.0029003		AT2G23100	-0.0485322	0.00162214		AT4G13750	-0.00450022	0.00491518		AT5G04950	0.00737432	2.25761e-06
AT5G46330	-0.051664	0.000160473		AT1G73120	0.0129689	0.00290801		AT3G12040	-0.0370901	0.00162214		AT1G12900	0.0114788	0.0049174		AT5G08570	0.00245888	2.26277e-06
AT5G27100	-0.0243286	0.000161109		AT3G53540	0.00822692	0.00290801		AT4G19050	-0.048593	0.00162214		AT3G52370	-0.00368091	0.0049174		AT5G27450	-0.00467851	2.28231e-06
AT2G36460	-0.0186835	0.00016132		AT4G01630	0.0225635	0.00290801		AT4G31000	0.0254902	0.00162214		AT3G16770	0.00474972	0.00492804		AT3G22800	-0.00658851	2.33394e-06
AT4G01830	0.0392394	0.000163229		AT1G72430	-0.0163255	0.0029162		AT1G02690	0.0194659	0.00162438		AT1G58180	0.00396969	0.00492981		AT4G31710	-0.018641	2.33394e-06
AT5G50200	-0.0206506	0.000166961		AT1G64950	0.00641769	0.00292266		AT4G38100	0.0228692	0.00162438		AT2G18560	0.00359615	0.00492981		AT5G45390	0.00292701	2.33394e-06
AT3G19900	0.0169751	0.00016826		AT5G43580	0.0132209	0.00293851		AT5G11670	-0.02218	0.00162438		AT5G39120	0.00443826	0.00495846		AT3G56480	-0.00425577	2.33864e-06
AT2G04090	0.0227879	0.000171823		AT3G09035	-0.0104532	0.0029582		AT4G29905	-0.047157	0.00163714		AT2G44670	0.00368017	0.00497123		AT4G08250	-0.0111104	2.34678e-06
AT5G49850	-0.0248643	0.000171927		AT3G14050	-0.0069981	0.00297012		AT1G24150	-0.0213042	0.00164099		AT1G15660	-0.00302483	0.00497509		AT2G47390	0.002634	2.35913e-06
AT1G31935	0.0241555	0.000173109		AT4G23630	0.00660617	0.00300059		AT4G04695	-0.0272945	0.00165011		AT1G79060	-0.00397297	0.00498852		AT5G05230	0.00425392	2.44685e-06
AT3G20460	0.0280836	0.000174997		AT5G13550	0.00835085	0.00300059		AT5G13800	-0.0163538	0.00165093		AT1G68260	0.00393275	0.00501336		AT2G44310	0.00558502	2.45524e-06
AT5G42050	0.0134959	0.000180557		AT5G15190	0.0160632	0.00301653		AT5G56660	0.0204465	0.00167709		AT4G26860	0.0025828	0.00501389		AT5G13330	0.00908715	2.5079e-06
AT1G52565	0.0275898	0.0001841		AT3G15790	0.0108719	0.00302299		AT1G04610	-0.0278071	0.00167743		AT1G23540	-0.00856173	0.00502377		AT2G41010	0.00721075	2.52138e-06
AT3G19680	-0.0188362	0.000184358		AT4G22930	0.00653768	0.00302302		AT1G61130	-0.0636811	0.00168748		AT1G31940	0.00381934	0.00505637		AT1G23190	0.00386946	2.53771e-06
AT4G01480	0.0147283	0.000185615		AT4G35290	-0.00982448	0.00307032		AT1G26450	0.022391	0.00169041		AT2G20400	0.00285679	0.00505637		AT3G52490	-0.00522287	2.54139e-06
AT4G15360	-0.0303971	0.000190218		AT2G46400	-0.0165348	0.00307036		AT4G17730	-0.0205239	0.00169077		AT4G07455	0.00622062	0.00505637		AT2G01850	0.00406018	2.54441e-06
AT1G08510	0.00848227	0.000190446		AT1G71030	-0.0225251	0.00308601		AT2G43700	-0.043033	0.00169127		AT4G30320	-0.00692802	0.00507684		AT2G04350	0.00435912	2.58966e-06
AT3G27200	0.0147081	0.000191434		AT5G16530	-0.0176749	0.00309047		AT2G45520	0.0278944	0.00169127		AT4G30610	-0.00386617	0.00507703		AT5G57815	0.00467575	2.61263e-06
AT5G62520	-0.031104	0.00019275		AT5G28510	0.0517342	0.00312905		AT4G14368	-0.0681872	0.0017022		AT1G34540	-0.0217794	0.0050905		AT3G54870	-0.00805418	2.62238e-06
AT1G45145	0.0196716	0.000194004		AT1G72450	0.0110197	0.00313096		AT5G48320	-0.0421735	0.00170242		AT3G63160	0.00982069	0.0050978		AT1G79470	-0.00816233	2.62245e-06
AT4G27020	0.0175347	0.000194574		AT4G01950	0.009869	0.00313906		AT1G75330	0.0176202	0.00170543		AT1G30380	0.00632327	0.00510083		AT4G33120	0.00614183	2.64545e-06
AT4G21250	-0.0258661	0.000200605		AT5G56150	0.008799	0.00315915		AT1G51500	0.0211423	0.0017111		AT1G76410	0.00726875	0.00510083		AT5G58250	0.00601771	2.64552e-06
AT5G15230	-0.0272186	0.000201257		AT5G63560	0.00838333	0.00315915		AT1G53180	-0.0307375	0.00171867		AT5G05230	0.0030264	0.00510083		AT2G29630	0.00590317	2.67263e-06
AT3G23810	0.026902	0.000202234		AT1G33110	0.00572687	0.00318348		AT1G56560	-0.0206368	0.00172693		AT4G32780	-0.00363749	0.00510302		AT1G27150	0.00468044	2.7066e-06
AT3G47960	0.0200328	0.000202234		AT1G09080	-0.0396845	0.00323718		AT3G04500	0.0178714	0.0017295		AT5G03260	-0.0059412	0.00510302		AT1G53190	-0.00481742	2.7066e-06
AT3G49680	-0.0101657	0.000202234		AT5G55400	0.00763437	0.00323718		AT2G43840	-0.0436251	0.00173484		AT4G09650	0.00486683	0.00514023		AT1G70730	0.00320181	2.72467e-06
AT2G22510	0.0197702	0.000203636		AT5G48480	0.00738785	0.00324641		AT5G23850	0.0298321	0.00173484		AT2G19060	-0.0059308	0.00519166		AT4G35270	-0.00415691	2.73448e-06
AT1G53380	-0.0140526	0.000203677		AT1G10380	-0.0095296	0.00326175		AT1G21390	-0.0212894	0.00174086		AT1G80530	0.00219477	0.00520434		AT3G02780	0.00336832	2.76691e-06
AT3G20395	-0.0820412	0.000207958		AT5G59090	-0.0100414	0.00328386		AT4G39240	0.0159847	0.0017414		AT1G64910	-0.00651602	0.00521835		AT4G17090	0.011381	2.81492e-06
AT4G33270	-0.0157207	0.000209716		AT5G39580	0.0213208	0.00330132		AT3G18165	0.0179563	0.00174606		AT4G11960	0.00311985	0.0052653		AT3G16520	0.00563874	2.86518e-06
AT5G38010	0.0194405	0.000215625		AT1G51790	-0.0120748	0.00333054		AT3G53230	0.0141661	0.00174606		AT3G23890	-0.00402404	0.0052905		AT3G18200	-0.00497619	2.86737e-06
AT1G28480	0.0409665	0.000219176		AT1G69870	0.0124437	0.00333054		AT1G70520	-0.0228926	0.00175169		AT4G04640	0.00479128	0.00532214		AT1G18210	0.00435987	2.95495e-06
AT5G42630	-0.0208387	0.000223416		AT2G02990	0.0210024	0.00333054		AT1G35710	-0.0387592	0.00175245		AT2G18240	0.00329105	0.00535578		AT5G23860	-0.00579343	2.97795e-06
AT1G68540	0.0261571	0.000225233		AT3G46450	0.00777491	0.0033412		AT5G13200	-0.0209321	0.00175568		AT1G10570	0.00269086	0.00535582		AT3G20935	0.00610215	3.00513e-06
AT1G63090	-0.0256215	0.000227313		AT5G26340	0.0117232	0.00334183		AT1G79470	-0.0224335	0.00176959		AT1G67740	0.00754995	0.0053577		AT4G04610	-0.00771248	3.00513e-06
AT1G63660	-0.0122745	0.000227791		AT5G23100	-0.0105019	0.00334867		AT3G26220	-0.073729	0.00178872		AT1G32583	0.00584441	0.00536987		AT3G27884	-0.00559516	3.04114e-06
AT3G04730	0.0143426	0.000228338		AT1G44970	0.0108406	0.00335182		AT2G21385	0.0235055	0.00179491		AT1G64940	0.00478434	0.00536987		AT2G05070	0.0111792	3.05229e-06
AT4G03610	0.0204628	0.00022877		AT3G09400	-0.0246425	0.00339762		AT5G47040	-0.0188591	0.00179651		AT2G40330	-0.00813997	0.00536987		AT5G01630	-0.00645762	3.05229e-06
AT2G37270	-0.011755	0.000239041		AT1G01060	0.0114616	0.00340771		AT2G19800	-0.0472156	0.00180618		AT3G10690	-0.00310252	0.00536987		AT4G36260	-0.00766067	3.14337e-06
AT3G14690	0.0206138	0.000239059		AT1G34315	-0.0107177	0.00340771		AT5G01500	0.0165261	0.00181478		AT4G36920	-0.00245598	0.00536987		AT5G63810	-0.00443322	3.17016e-06
AT1G75270	0.0149887	0.000240366		AT1G60190	0.0141986	0.00340771		AT1G71310	0.0218207	0.00181654		AT5G02170	-0.00493582	0.00536987		AT5G50130	0.00850373	3.2012e-06
AT3G47950	0.0188759	0.000241149		AT4G16563	-0.0163427	0.00340771		AT2G36390	0.0276446	0.00184164		AT5G59700	0.0022984	0.00536987		AT2G25980	-0.00368176	3.2058e-06
AT2G28960	-0.0247784	0.000251297		AT2G29120	0.0225061	0.00341835		AT3G47510	0.0289731	0.00184653		AT5G01520	0.00361145	0.00540704		AT3G12800	0.00417549	3.22104e-06
AT4G08290	0.0269709	0.000251297		AT5G43270	-0.00719184	0.00342104		AT3G63380	-0.0343922	0.00186234		AT5G48880	0.00735044	0.00543703		AT4G27430	-0.00396303	3.27933e-06
AT3G44860	0.0551418	0.000253036		AT5G48850	0.0079034	0.00342622		AT1G31120	-0.0179782	0.0018635		AT4G18020	0.00345667	0.00543806		AT2G36390	0.00418196	3.28404e-06
AT5G63130	0.033087	0.000254272		AT5G62200	0.00904044	0.00342622		AT3G08950	0.0182853	0.00188291		AT2G14095	-0.00613237	0.00543938		AT3G23600	0.00343809	3.28404e-06
AT2G35770	0.0215146	0.000255664		AT1G79820	0.00773491	0.00343		AT4G20840	-0.0307918	0.00188291		AT3G27540	0.00663184	0.0054643		AT3G54050	0.0112668	3.28404e-06
AT1G07430	0.049431	0.000256724		AT1G69310	0.00634619	0.00346936		AT3G63030	0.0277456	0.00188297		AT3G45590	0.00466684	0.00547094		AT1G71865	0.007563	3.37682e-06
AT4G01890	0.0402514	0.000259719		AT1G03310	0.00984347	0.00348331		AT1G67710	-0.023	0.00189417		AT5G48412	0.00554949	0.00549381		AT2G35760	0.007232	3.37682e-06
AT4G23180	0.032929	0.000259719		AT5G18670	-0.0197383	0.00351156		AT2G15400	0.0311583	0.00190192		AT1G27650	0.00205749	0.00549687		AT5G42830	-0.00511072	3.37682e-06
AT3G56080	0.0508878	0.000261994		AT4G39795	-0.0180849	0.00351208		AT2G22630	-0.0404101	0.00191162		AT5G26310	-0.00338037	0.00549687		AT4G05190	-0.00627356	3.38161e-06
AT4G21570	0.0200758	0.000261994		AT3G21260	-0.0085995	0.00352854		AT1G17460	0.0331154	0.001917		AT1G52190	-0.00635804	0.00555002		AT4G36410	-0.00929442	3.50251e-06
AT1G49430	0.0161463	0.000266714		AT4G35040	0.00601399	0.00356765		AT5G23030	-0.0539586	0.00192278		AT2G10940	0.0250617	0.00557857		AT2G43530	0.0127038	3.54387e-06
AT1G69900	-0.0279767	0.000269979		AT1G02930	0.0193853	0.00356807		AT1G07180	0.0949753	0.00193026		AT2G34357	-0.0037206	0.00565738		AT4G04620	0.0048121	3.5475e-06
AT2G26290	0.0221394	0.000272977		AT2G33540	-0.00808585	0.00358205		AT5G14140	0.0198824	0.00194174		AT3G03470	-0.0039529	0.00565738		AT1G44446	0.00478216	3.56869e-06
AT4G29220	-0.0135295	0.000273242		AT5G27600	0.00700079	0.00358205		AT2G23200	-0.0530975	0.00195936		AT3G26070	0.00323395	0.00566701		AT1G48745	0.0101397	3.56869e-06
AT5G49900	0.0172167	0.000280041		AT3G50610	0.0340412	0.00358996		AT3G56620	-0.0518727	0.00197081		AT5G17170	0.00828648	0.00569403		AT3G03660	0.0163071	3.56869e-06
AT2G39310	0.0244694	0.000283893		AT5G57345	0.0162291	0.00359307		AT3G47950	-0.0222705	0.00197556		AT1G19080	0.00380725	0.00570074		AT4G25000	-0.0159615	3.59357e-06
AT3G02940	0.0335576	0.000283893		AT4G13180	0.00612268	0.00359794		AT4G39380	0.0281868	0.00197624		AT2G07050	-0.00287447	0.0057548		AT4G33450	0.00703796	3.62351e-06
AT1G56140	-0.0134035	0.000285788		AT5G44410	-0.0132346	0.0036049		AT1G64200	-0.0311225	0.00198581		AT3G46780	0.0125099	0.00576183		AT2G30740	-0.00318085	3.66104e-06
AT3G12240	-0.0297367	0.000289616		AT4G33150	0.0115485	0.00360658		AT4G17300	0.0191377	0.0019884		AT5G67370	0.00372635	0.00576183		AT3G10500	-0.00326828	3.73077e-06
AT5G02000	0.0539682	0.000289834		AT1G59960	0.00576072	0.00360905		AT1G11460	-0.0500545	0.00200019		AT5G20520	0.00197344	0.00578567		AT2G07680	-0.00562926	3.73101e-06
AT5G20700	0.0159535	0.00029176		AT5G03210	0.0192831	0.00360905		AT5G53730	-0.0455954	0.00201184		AT4G17730	0.0025916	0.00586646		AT2G44970	0.00389362	3.73278e-06
AT5G65380	0.0182734	0.000292146		AT2G28370	-0.008848	0.00361857		AT4G25860	0.0517858	0.00203003		AT2G36145	0.00828681	0.00586985		AT5G23430	-0.00356239	3.73889e-06
AT1G78780	0.0202799	0.000293336		AT3G44880	0.0121989	0.00363749		AT2G23770	-0.0269077	0.00206462		AT4G39010	-0.00963293	0.00591513		AT5G54400	0.00882737	3.77485e-06
AT3G03870	0.0207658	0.000295129		AT5G44910	-0.0120897	0.00363749		AT1G55240	-0.0410756	0.00207513		AT2G41000	0.00297063	0.00592278		AT1G16180	0.00319936	3.77932e-06
AT1G52200	-0.0195183	0.000295478		AT5G03190	0.00720257	0.00365225		AT1G72150	-0.0259629	0.00207637		AT1G14345	0.00485483	0.00594343		AT1G03040	0.0033029	3.78254e-06
AT4G17490	-0.0297113	0.000295478		AT3G50460	-0.0352413	0.00367758		AT3G49790	-0.0597135	0.00207831		AT5G04150	-0.00872072	0.00596436		AT3G12620	0.00319653	3.79616e-06
AT4G30140	-0.0268342	0.000295478		AT1G09350	-0.0135648	0.00371586		AT3G04030	-0.0267271	0.00208578		AT1G67700	0.00362079	0.006006		AT2G25160	-0.00773644	3.80321e-06
AT3G54020	0.016086	0.000299568		AT3G23050	0.00684627	0.00372491		AT1G76360	-0.0357301	0.00208612		AT5G03150	-0.0027275	0.0060541		AT1G19570	0.00509031	3.82171e-06
AT4G19975	0.0389017	0.00030072		AT3G05390	0.0174719	0.00376002		AT3G16690	-0.0399502	0.00208612		AT5G57910	0.00343064	0.0061146		AT1G06650	0.00620079	3.84251e-06
AT1G72940	-0.0349391	0.000303017		AT5G62360	-0.0315128	0.00376002		AT1G60787	-0.0624647	0.0020921		AT1G72430	-0.00474947	0.00611498		AT4G36270	-0.00681515	3.90323e-06
AT3G56240	0.0127036	0.000307723		AT2G17820	-0.0104203	0.0037698		AT2G41630	0.012365	0.0020921		AT3G12100	0.00245052	0.00611498		AT1G75220	-0.00460388	3.93877e-06
AT2G40340	-0.0634079	0.00030773		AT1G75330	0.00641551	0.00379355		AT1G11330	-0.027302	0.00209724		AT3G27610	0.00308077	0.00611498		AT4G23630	0.00329932	3.94182e-06
AT3G10410	0.00924049	0.00030773		AT2G22620	0.0109807	0.00379355		AT5G07580	-0.0308459	0.00210045		AT4G03420	0.00341862	0.00611498		AT5G61460	-0.00646047	3.94182e-06
AT5G60770	-0.0597963	0.000311549		AT4G12130	0.00838733	0.00379355		AT2G28270	-0.0680504	0.0021066		AT1G08180	0.00433768	0.00612584		AT5G02480	0.00301874	3.9645e-06
AT3G16470	0.0221411	0.00031181		AT4G30460	0.0114684	0.00379355		AT3G46940	0.020949	0.00211775		AT5G63350	0.00659572	0.00612584		AT4G11170	-0.018329	3.98753e-06
AT4G15760	0.0192226	0.00031181		AT5G52300	0.0416084	0.00379355		AT5G03840	-0.0527174	0.00213765		AT5G53490	0.00521258	0.00615461		AT4G27970	0.00562207	4.06102e-06
AT5G03330	-0.0214998	0.000312029		AT5G58750	-0.0152509	0.00379355		AT1G52310	0.0185459	0.00215678		AT2G18370	0.0036674	0.00617807		AT1G15280	-0.00394168	4.08819e-06
AT5G58670	0.0245581	0.000312817		AT1G10400	-0.0276112	0.00385476		AT4G39955	0.0207049	0.00215678		AT5G62200	0.00256907	0.00619599		AT2G32930	0.00530599	4.13981e-06
AT1G56320	0.0190506	0.000314369		AT4G12350	0.0181576	0.00386219		AT1G20010	-0.0182396	0.0021783		AT4G32800	-0.00754512	0.00620171		AT5G01040	-0.00699841	4.13981e-06
AT1G80360	-0.0160652	0.000320891		AT1G16310	0.00862465	0.00386302		AT5G22270	0.0420278	0.0021783		AT5G65870	0.00441567	0.00622838		AT1G77990	0.0075187	4.15085e-06
AT2G23060	0.0313771	0.000324029		AT1G13990	0.00693345	0.00386602		AT1G78090	-0.0297962	0.00220415		AT1G76100	0.0088886	0.00624128		AT1G56600	0.0132912	4.15529e-06
AT5G07460	-0.0236237	0.000324675		AT4G19810	0.0128164	0.00388059		AT1G11280	-0.0168195	0.00220527		AT3G24480	-0.00523593	0.00626156		AT5G24090	0.00503275	4.15529e-06
AT3G18560	-0.0216409	0.000328959		AT1G13540	-0.0191803	0.00388149		AT1G19020	-0.022455	0.0022053		AT1G75690	0.00614376	0.00627964		AT4G00020	-0.00630934	4.1608e-06
AT5G66880	0.0128658	0.000334963		AT1G47128	0.00565961	0.00388235		AT1G22460	-0.0506749	0.00220985		AT3G50010	-0.0060474	0.00632502		AT3G14440	-0.00638645	4.1874e-06
AT1G31885	-0.0204161	0.000336852		AT3G14690	0.00757016	0.0039593		AT5G67070	0.0231052	0.00221656		AT4G27700	0.0053751	0.00632502		AT3G53150	-0.0105963	4.1874e-06
AT5G20150	0.0225064	0.000338496		AT5G66120	0.00580988	0.0039593		AT5G12330	0.0349984	0.00221834		AT5G52910	-0.00413058	0.00632556		AT2G20270	0.00415014	4.22753e-06
AT5G63650	-0.02067	0.000340141		AT1G71740	0.0102104	0.00397603		AT3G04140	-0.021049	0.00221852		AT1G34418	0.00690789	0.00636599		AT5G02050	-0.00336992	4.255e-06
AT1G24440	0.0189031	0.000346745		AT1G63240	0.0117387	0.00397845		AT1G12000	0.0170942	0.00224444		AT1G70370	-0.00227548	0.00642809		AT4G32650	0.00450365	4.30944e-06
AT4G01870	0.0237845	0.000346745		AT1G28330	-0.0145544	0.00399223		AT3G52490	-0.0215282	0.00224478		AT1G13990	0.00292184	0.00643643		AT5G11330	0.0044222	4.35104e-06
AT4G33580	0.0153978	0.000346745		AT2G31810	-0.00768051	0.00403127		AT2G21250	0.0170792	0.00225703		AT1G73650	0.00305285	0.00643643		AT2G41870	0.00590979	4.35688e-06
AT2G36295	0.0387696	0.000347895		AT3G08630	0.00650569	0.00403718		AT4G31710	-0.0588002	0.00226429		AT1G77760	-0.0036783	0.00645608		AT3G05030	0.00476259	4.35688e-06
AT1G79310	0.0178483	0.000348688		AT3G19640	0.0045011	0.00403718		AT1G62810	-0.0196218	0.00226885		AT3G16240	-0.00341063	0.00645608		AT5G27120	-0.00436883	4.36042e-06
AT3G53620	0.0123588	0.000350487		AT5G49630	-0.0111029	0.00403718		AT1G16030	-0.0254751	0.00227359		AT5G48540	0.00358914	0.00645608		AT2G46500	-0.00385775	4.43459e-06
AT1G02810	-0.021844	0.000351619		AT2G41370	-0.0126053	0.0041131		AT2G23600	-0.0285829	0.00228766		AT1G02810	-0.00364543	0.00650952		AT4G09620	0.00428626	4.44694e-06
AT2G41810	-0.019313	0.000352995		AT1G48500	-0.016265	0.00412245		AT2G32280	0.0260153	0.00229116		AT5G23860	-0.00284337	0.00657636		AT2G04805	0.0105284	4.44851e-06
AT4G04990	0.0272682	0.000354539		AT1G12110	-0.0128313	0.00414942		AT1G29980	0.0189069	0.00229254		AT2G28970	-0.00304962	0.00658851		AT3G14770	-0.00624926	4.45236e-06
AT1G71960	0.0136532	0.000357446		AT2G18300	-0.0292905	0.00416516		AT1G12740	-0.0198151	0.00230453		AT5G06960	0.00185586	0.00659327		AT4G30450	0.00537895	4.46774e-06
AT2G43420	-0.016705	0.000357644		AT1G61560	-0.0141238	0.00418558		AT2G31800	-0.0217369	0.00230728		AT5G14320	0.00279444	0.00659686		AT3G56310	0.00332276	4.52425e-06
AT3G21240	-0.0205306	0.000357671		AT2G35490	0.00731609	0.00418558		AT4G32870	0.027635	0.00233705		AT3G61220	0.0028533	0.00660088		AT1G20920	-0.00446984	4.53322e-06
AT3G57050	-0.00968602	0.000360141		AT1G76660	0.00533083	0.00420346		AT5G07360	-0.015534	0.00234822		AT4G16340	-0.00287068	0.00660088		AT4G22217	-0.0112393	4.53672e-06
AT3G03520	0.00928572	0.000360162		AT3G60415	0.0205404	0.00420346		AT5G53500	-0.0219831	0.00235379		AT5G65207	0.00411378	0.00660088		AT1G62640	-0.00307821	4.57681e-06
AT3G28715	0.0105767	0.000363238		AT1G48070	0.0390388	0.0042966		AT2G47550	-0.0504805	0.00235442		AT4G24930	0.00789084	0.0066151		AT4G25340	-0.00373418	4.60386e-06
AT4G04700	-0.0258627	0.0003644		AT3G02885	-0.012387	0.00436283		AT3G52850	-0.0122651	0.00235991		AT2G41510	-0.0107637	0.00683662		AT2G21045	0.00523773	4.62683e-06
AT2G46100	0.0136608	0.000364567		AT5G07870	-0.0133953	0.00439049		AT2G13360	-0.103634	0.00236587		AT1G48000	0.00408865	0.006839		AT1G10090	-0.00452672	4.63483e-06
AT2G47680	-0.0268684	0.000369701		AT3G52870	0.00550464	0.0044003		AT2G43020	0.01596	0.00236928		AT1G03620	0.004048	0.00692321		AT1G31460	0.00600739	4.65974e-06
AT1G78380	0.0202097	0.000379953		AT1G19250	0.0331492	0.00441273		AT3G14310	-0.0118627	0.00239523		AT5G56580	-0.00302008	0.00693173		AT5G04250	0.00527819	4.70889e-06
AT1G08500	0.0265433	0.000381506		AT3G12120	0.00676996	0.00444973		AT1G26470	0.0249929	0.00240301		AT2G19970	-0.00443848	0.00694353		AT1G32900	0.00959533	4.72948e-06
AT5G42250	0.0177972	0.000384388		AT3G19030	-0.0157961	0.00444973		AT2G14510	-0.0529372	0.00240301		AT2G32160	-0.0118094	0.00696527		AT5G65240	-0.00448772	4.73555e-06
AT2G23810	-0.0205941	0.000384414		AT1G29860	0.0205631	0.00447785		AT4G32690	0.0258863	0.00240875		AT5G18780	0.00273763	0.00706868		AT1G12010	-0.00822248	4.76843e-06
AT1G69520	-0.0331377	0.000387278		AT1G68410	0.00608434	0.00448868		AT1G04540	-0.0228567	0.00241163		AT2G05070	0.0120098	0.00708402		AT1G13090	0.00575106	4.78169e-06
AT3G48520	0.0399547	0.000387278		AT1G78780	0.0102969	0.00449329		AT1G05260	0.0218821	0.00244665		AT4G21760	-0.00550909	0.00708402		AT1G15960	0.0120883	4.78571e-06
AT1G15670	-0.01824	0.000388285		AT4G28640	0.0119128	0.00450385		AT1G16040	0.0242848	0.00244665		AT4G37150	0.00374444	0.00716818		AT1G05590	-0.00522871	4.79184e-06
AT1G54030	0.00990694	0.000394803		AT3G57470	-0.0077284	0.00450918		AT3G13790	-0.0226205	0.00244665		AT4G21860	0.00244383	0.00721879		AT2G22670	0.00259812	4.81805e-06
AT2G38180	0.0175762	0.000394803		AT5G63350	0.0184649	0.00451516		AT2G32160	-0.0973864	0.00245989		AT4G30860	-0.00339068	0.00721879		AT2G24940	0.0056547	4.90421e-06
AT1G11870	-0.017441	0.000395349		AT4G36760	0.00673111	0.00451824		AT1G32190	0.0236525	0.00246251		AT1G28110	-0.00337976	0.00722609		AT4G05050	0.00371097	4.99437e-06
AT1G53640	-0.0256279	0.000395349		AT5G50130	0.0169994	0.00452681		AT5G42930	-0.055239	0.00246251		AT5G47650	0.00303348	0.00727251		AT5G04960	-0.00734569	4.99749e-06
AT4G15765	0.0333662	0.000401984		AT3G09820	0.00442278	0.00457722		AT1G10070	-0.0658209	0.00247623		AT5G15410	-0.0042515	0.00729984		AT3G44050	-0.00530293	5.01408e-06
AT4G11211	0.0241927	0.000403846		AT5G16410	-0.0258392	0.00457722		AT5G65450	0.0224108	0.00247623		AT2G17695	0.00479644	0.00731817		AT4G04850	0.0039483	5.04545e-06
AT3G18830	0.0148405	0.000404866		AT5G44720	-0.00631683	0.00457722		AT1G50000	0.0283113	0.00248446		AT2G21385	0.00309803	0.00732215		AT1G22980	-0.0147003	5.0904e-06
AT5G56220	-0.0152701	0.000407603		AT5G19550	0.00586649	0.00458518		AT2G05940	-0.0182718	0.00248446		AT3G24495	-0.00313776	0.0073454		AT1G52190	-0.0110542	5.11703e-06
AT1G64370	0.0373847	0.000407948		AT2G21510	0.0164817	0.00459125		AT5G57180	-0.0452432	0.00249068		AT5G09225	0.00318323	0.0073454		AT2G17120	0.00419126	5.11703e-06
AT4G39980	-0.0158252	0.000408373		AT3G21340	-0.0203979	0.00459125		AT5G28520	-0.0785069	0.00249386		AT3G63060	0.0057629	0.00734559		AT2G38800	-0.00358038	5.11703e-06
AT4G19810	0.024703	0.000411142		AT2G25010	-0.00750835	0.00459546		AT1G54095	-0.0461009	0.00250274		AT4G23630	0.00285095	0.00734559		AT1G56120	-0.00967878	5.13382e-06
AT1G80240	-0.0235396	0.000415061		AT5G65110	0.00733099	0.00459546		AT1G56700	-0.0170904	0.00251264		AT1G61950	-0.0211139	0.00735996		AT4G13770	-0.0048998	5.15259e-06
AT5G55910	0.0106785	0.000415092		AT5G44020	-0.010196	0.00463536		AT1G80460	-0.0184308	0.00251264		AT1G07170	0.00321372	0.00737371		AT3G02880	-0.00384532	5.15788e-06
AT5G02420	0.0205351	0.000421424		AT2G25810	0.00835961	0.00464261		AT3G48920	0.0322298	0.00251264		AT4G19840	0.00291714	0.00742546		AT1G68040	-0.0280361	5.2294e-06
AT2G45960	0.0153368	0.000421529		AT1G31440	0.00569994	0.00469462		AT5G16590	-0.0161212	0.00251264		AT2G38940	0.0050856	0.00744488		AT4G20840	-0.0057988	5.2294e-06
AT1G49660	0.0134109	0.000423358		AT3G59910	0.00497642	0.00470336		AT1G71697	-0.0152547	0.00251449		AT5G65060	0.0028368	0.00744488		AT4G09020	0.00344085	5.23557e-06
AT4G11290	-0.0188413	0.000426826		AT5G43280	0.0062525	0.00470336		AT3G52240	-0.015451	0.00253598		AT3G44326	-0.00418913	0.0074628		AT4G22070	-0.00486885	5.23557e-06
AT2G17220	0.0147795	0.000427718		AT5G54165	0.0299745	0.00471547		AT2G03440	-0.0263753	0.00254759		AT3G44320	-0.00271511	0.00747718		AT1G76980	0.00472186	5.30654e-06
AT4G23630	0.0108473	0.0004321		AT3G18780	-0.00453334	0.00478707		AT5G05860	-0.0170176	0.00254759		AT1G67080	0.00408732	0.00749165		AT4G04940	-0.00651889	5.30938e-06
AT1G19000	0.0097019	0.000432267		AT3G30260	-0.0215055	0.00483258		AT3G06410	0.0191469	0.00255899		AT1G67090	0.00894302	0.00750081		AT1G59740	0.00614797	5.32726e-06
AT3G03150	0.0219675	0.000433648		AT5G61820	0.00611797	0.00483637		AT1G16260	-0.0548047	0.0025795		AT1G36622	0.00731573	0.00750843		AT4G35040	0.00327744	5.32726e-06
AT1G66760	0.0190075	0.000436824		AT1G61240	0.0073315	0.00484549		AT5G57480	-0.034245	0.0025795		AT5G46870	-0.00585482	0.00754574		AT1G10490	-0.00496228	5.35042e-06
AT2G29620	0.0271178	0.000437275		AT2G20142	-0.016119	0.00484549		AT5G24890	-0.0232837	0.00259508		AT4G15910	0.00365846	0.00761617		AT5G66540	-0.00456656	5.35042e-06
AT4G29160	0.0112561	0.000442307		AT5G07860	-0.0105842	0.00489747		AT5G48150	0.0148254	0.00259508		AT1G06923	-0.0106225	0.00762835		AT5G02120	0.0112823	5.41984e-06
AT1G58520	0.0216049	0.000444692		AT1G71380	0.0136815	0.00490765		AT2G41240	-0.0723903	0.00260294		AT4G23620	-0.00274283	0.00766172		AT1G60950	0.00743778	5.44497e-06
AT1G59725	0.027378	0.000445554		AT1G01140	0.0183848	0.00492966		AT2G33580	-0.0270112	0.00261332		AT2G47130	0.00278405	0.00766304		AT3G21540	-0.00470775	5.55284e-06
AT1G61795	0.0193904	0.000447858		AT2G44970	0.00541733	0.00494676		AT2G04050	0.0942031	0.00262969		AT4G36430	0.00313179	0.00766304		AT5G58220	0.00446712	5.56041e-06
AT1G13590	-0.0290266	0.000448031		AT4G01120	-0.00716974	0.00495388		AT1G22990	0.0391748	0.00263145		AT3G12760	0.00184601	0.00767792		AT4G39210	0.00843099	5.6493e-06
AT1G64720	-0.0255297	0.00046074		AT5G57840	0.0069778	0.00497548		AT3G08943	0.016023	0.00264446		AT5G17300	0.0039511	0.00769196		AT4G34180	0.00370173	5.66433e-06
AT1G79270	0.0179526	0.000461874		AT1G64530	-0.00668712	0.00499575		AT5G65210	-0.0212154	0.0026445		AT4G27510	-0.00877461	0.00773046		AT5G55970	-0.00668499	5.67793e-06
AT1G69850	-0.0137012	0.000462521		AT4G18700	0.00774204	0.00502516		AT5G03570	0.0268895	0.00266238		AT1G47395	-0.011243	0.00775476		AT5G17270	-0.00410208	5.69646e-06
AT2G31110	-0.0227959	0.000462521		AT2G46890	-0.00917857	0.00505631		AT4G14390	-0.0339118	0.00267563		AT1G79250	-0.0113127	0.00775476		AT4G14615	0.00488041	5.8182e-06
AT4G13100	0.0178986	0.000463208		AT4G25960	0.0162523	0.00507059		AT5G20860	-0.0309147	0.00268183		AT1G11170	0.00347967	0.00779704		AT2G16760	-0.00587614	5.83068e-06
AT5G27350	0.0153915	0.000475692		AT1G76720	-0.0172914	0.00507318		AT1G57980	-0.0512753	0.00269762		AT1G06570	0.00277756	0.0078172		AT2G27290	0.00756466	5.8502e-06
AT5G13800	0.0149607	0.000477927		AT3G16690	-0.0138283	0.00507318		AT1G13670	-0.0358026	0.00269927		AT5G18840	0.00282221	0.00781979		AT4G26470	0.00553317	5.85244e-06
AT3G46330	-0.0248481	0.00048459		AT3G29390	-0.00590465	0.00507318		AT2G25930	-0.017922	0.00269927		AT5G25880	-0.00525304	0.00787798		AT5G28500	0.00994687	5.86526e-06
AT5G42830	-0.0209434	0.000491494		AT5G58910	-0.0114988	0.00507318		AT3G53190	-0.0156562	0.00269927		AT1G58235	0.00358327	0.00788441		AT1G66950	-0.0126432	5.87769e-06
AT1G80280	-0.0161288	0.000497322		AT3G46880	-0.0224262	0.00512234		AT3G27070	-0.0401499	0.0027226		AT1G76450	0.0045698	0.00788441		AT4G15780	0.00620219	5.878e-06
AT1G66440	-0.030913	0.000499599		AT3G05155	-0.0150421	0.00515529		AT5G38200	-0.0293878	0.00272451		AT1G66970	-0.00807511	0.00793288		AT5G43370	0.0110023	5.89941e-06
AT3G45680	0.0290298	0.000499599		AT5G16000	-0.00631108	0.00515529		AT4G38060	-0.0224086	0.00274663		AT4G27250	0.00708213	0.00806821		AT5G03640	-0.0102001	5.91631e-06
AT5G25800	-0.0186604	0.000503107		AT4G31290	0.0105808	0.0051809		AT1G18850	0.015076	0.00275411		AT5G51600	-0.00297392	0.00808403		AT1G23030	-0.00443217	5.98775e-06
AT5G45500	-0.0145325	0.000506742		AT4G22960	0.0179114	0.00522403		AT5G19190	-0.0293719	0.00277173		AT1G53830	-0.00491518	0.00808714		AT2G46950	0.00524763	6.01401e-06
AT3G58550	0.0203504	0.000514202		AT5G66170	0.0131837	0.00522562		AT4G18550	-0.0284352	0.00277506		AT3G51000	0.00255615	0.00810354		AT1G29040	0.0040734	6.05082e-06
AT1G14870	-0.0237744	0.000514787		AT3G58270	0.0105777	0.00525975		AT1G75220	-0.0234325	0.00277509		AT3G46640	-0.0048393	0.00813472		AT3G56980	-0.00959112	6.06036e-06
AT3G57330	-0.0152317	0.000514787		AT1G51880	-0.0198471	0.00527706		AT4G14365	-0.08822	0.00278007		AT5G44000	0.00317475	0.00818185		AT2G38870	0.00853881	6.06184e-06
AT4G38340	-0.0415486	0.000515198		AT3G01860	-0.00669123	0.00527706		AT4G39640	-0.0240889	0.00279042		AT3G46610	0.00390786	0.00820693		AT2G40840	0.00352684	6.08044e-06
AT1G78610	0.0141627	0.000522847		AT3G25790	-0.00964813	0.00527717		AT2G26480	-0.0166178	0.00279962		AT4G01280	0.00241626	0.00821037		AT1G20190	0.00441513	6.19158e-06
AT1G62430	0.0149157	0.00052445		AT1G21410	0.00788451	0.00531082		AT2G18000	0.0323742	0.0028156		AT1G64780	0.00289808	0.00824923		AT4G01883	0.00710106	6.26992e-06
AT3G14840	-0.0148883	0.000524733		AT4G35020	-0.00691631	0.00533936		AT5G19870	-0.0487933	0.0028156		AT4G00740	-0.00155685	0.00824923		AT5G51795	-0.00997167	6.31727e-06
AT4G12580	0.0294629	0.000526575		AT2G01930	-0.00819571	0.00534186		AT3G10740	-0.0455372	0.00283608		AT1G64510	0.00283109	0.00831785		AT5G24140	-0.00986604	6.36393e-06
AT1G57720	-0.0072734	0.000527865		AT1G76680	-0.00848444	0.00534661		AT5G35525	-0.0614454	0.00283982		AT5G03240	0.00318329	0.00838025		AT1G71400	-0.00667116	6.40275e-06
AT4G15850	-0.0192421	0.00052896		AT4G15393	0.00945049	0.00539099		AT1G34210	0.0182837	0.00284118		AT5G08540	0.00270216	0.00838025		AT5G26360	-0.00422024	6.40275e-06
AT1G12950	0.0194645	0.000531655		AT3G20940	0.00716009	0.00543697		AT3G47110	-0.0434519	0.00284118		AT5G37360	0.00380238	0.00838025		AT4G15370	0.0158671	6.42872e-06
AT1G73270	-0.0195093	0.000531663		AT3G54150	0.0124548	0.00543697		AT5G59030	0.024124	0.00284118		AT1G53560	0.00446846	0.00840376		AT4G04745	0.00757019	6.46687e-06
AT2G38050	0.0158965	0.000531663		AT1G72770	0.00931935	0.00544944		AT5G34850	-0.0205219	0.00284241		AT2G45380	0.00216994	0.00842976		AT1G01170	0.0103372	6.47414e-06
AT5G54585	0.0482644	0.000531663		AT3G62700	0.0117273	0.0054557		AT2G42060	-0.0319902	0.00286917		AT1G49660	-0.00234569	0.00843903		AT4G29020	-0.00765175	6.47414e-06
AT4G20260	0.0131595	0.00053455		AT5G45490	-0.0127518	0.00548432		AT5G01470	0.0255898	0.00286917		AT4G16370	-0.00463903	0.00843903		AT5G60960	-0.00392344	6.47414e-06
AT2G38700	0.00927024	0.000540575		AT1G79450	0.00859279	0.00551145		AT3G23550	-0.0798976	0.00287512		AT4G31340	-0.00177822	0.00852287		AT2G27510	0.00531693	6.58466e-06
AT3G49700	0.0452675	0.000540575		AT5G55970	-0.0122989	0.00551145		AT4G17340	-0.0422096	0.00287569		AT3G44300	0.00438355	0.008558		AT1G14160	-0.00936282	6.58745e-06
AT5G42840	-0.0360537	0.000540575		AT5G45500	-0.00523005	0.00554817		AT3G44730	-0.0176001	0.00288492		AT1G14480	-0.00518504	0.00858593		AT3G23050	0.00374822	6.5891e-06
AT2G36110	-0.0484152	0.000542866		AT1G26930	0.00753856	0.00556888		AT2G01890	-0.0268461	0.00289395		AT2G38823	0.00675505	0.00858593		AT1G72220	0.00698294	6.63731e-06
AT5G25110	-0.0319167	0.000542866		AT2G39660	0.00546492	0.00563832		AT4G13620	-0.0423495	0.00289737		AT3G20370	-0.00242226	0.00858593		AT1G77380	0.00817464	6.65876e-06
AT5G46350	0.0328549	0.000548964		AT1G20840	-0.00638049	0.00565292		AT1G07400	0.0734318	0.00290938		AT1G71500	0.00382638	0.00865641		AT3G51350	-0.0067344	6.68766e-06
AT4G29990	-0.0268168	0.000549654		AT3G14240	-0.00820933	0.00570815		AT3G23820	-0.0166586	0.00291071		AT5G25770	0.0022761	0.00867935		AT5G11000	-0.00364818	6.74504e-06
AT1G43910	-0.0202792	0.000570145		AT4G19450	0.0103369	0.00573536		AT5G54100	0.0207496	0.00295198		AT2G20580	-0.00207546	0.00868479		AT1G30260	0.00773041	6.85777e-06
AT5G43370	-0.019847	0.000573347		AT5G35750	-0.0114242	0.00574988		AT3G02550	0.0255129	0.00295569		AT4G26080	0.00255045	0.00868479		AT4G00700	0.004085	6.87624e-06
AT3G05880	0.0243019	0.00057509		AT5G14070	-0.0307091	0.00575594		AT3G09400	-0.0412965	0.00295974		AT1G17780	0.00371671	0.0086955		AT2G23830	-0.0196512	6.92869e-06
AT5G19040	-0.0255929	0.000576553		AT5G19740	-0.00701668	0.00576345		AT3G05380	0.0154844	0.00296997		AT3G07568	0.00394108	0.00869565		AT2G02390	0.00445563	7.03902e-06
AT2G42600	0.0230896	0.000577537		AT4G25100	0.0263989	0.0057887		AT2G32600	0.0163219	0.00299172		AT1G66140	0.00294045	0.00869645		AT4G21580	0.00366073	7.03902e-06
AT4G20390	0.0182122	0.000582011		AT5G22290	0.0107846	0.00579154		AT1G69410	0.0140927	0.00299215		AT1G75780	-0.00700361	0.00869645		AT5G38520	0.00995319	7.05943e-06
AT4G03500	-0.0272205	0.000584575		AT2G20230	-0.00671273	0.0058023		AT2G29710	-0.0375021	0.00299215		AT4G23450	0.00304091	0.00869645		AT1G09235	0.00846373	7.08209e-06
AT4G11320	0.0311513	0.000592895		AT5G48150	0.00578005	0.0058023		AT4G02130	0.019077	0.00299813		AT4G19990	0.002556	0.00872014		AT5G08410	0.00650847	7.08209e-06
AT2G34000	-0.0420495	0.000595398		AT2G43490	0.00776744	0.0058208		AT2G42690	-0.0235385	0.00300008		AT1G63930	-0.00544627	0.00872605		AT2G22430	0.00435591	7.23512e-06
AT1G55380	-0.0352693	0.000596826		AT2G28100	-0.0103161	0.00586339		AT2G38450	0.0210545	0.00302751		AT4G31390	0.00307052	0.00872605		AT1G76090	-0.00514975	7.30116e-06
AT5G49810	0.011619	0.000602863		AT5G20190	0.00629181	0.00586339		AT4G02380	0.0346684	0.00302839		AT1G44446	0.00420218	0.00875116		AT1G44180	-0.00692401	7.4365e-06
AT3G16800	0.0140066	0.000604722		AT5G20150	0.0122214	0.00592793		AT4G17720	0.0157835	0.00302839		AT4G22240	0.00182647	0.00878763		AT2G33070	0.0134196	7.55847e-06
AT5G51890	0.0232231	0.000614211		AT5G64250	0.00715922	0.00592793		AT5G24860	-0.0875616	0.00303255		AT3G03200	-0.00662596	0.00880775		AT5G14210	-0.00456221	7.64642e-06
AT2G41170	0.0206634	0.000618005		AT1G69440	-0.0109711	0.00593306		AT5G60790	0.012568	0.00305982		AT2G38230	0.00469399	0.0088083		AT2G46580	0.00615627	7.70616e-06
AT5G19230	0.0183802	0.000620011		AT3G15350	0.00789947	0.00595693		AT5G46370	-0.0877833	0.00309086		AT2G28860	-0.0233922	0.00881248		AT5G19970	0.00377376	7.77621e-06
AT5G48940	-0.0186916	0.00062143		AT3G46900	0.0195773	0.00595693		AT4G27370	0.0208121	0.0031185		AT4G02360	0.00532864	0.00881248		AT3G53130	0.00896776	7.77622e-06
AT3G53370	0.0257007	0.000627732		AT2G04690	-0.0103712	0.00608508		AT1G50490	0.0157626	0.00312263		AT1G13210	-0.00298354	0.00886485		AT1G64770	0.0168184	7.91946e-06
AT5G56970	0.0283768	0.000627955		AT3G17180	0.0515744	0.00608508		AT3G45230	0.0252313	0.00312986		AT2G01220	0.00235026	0.00894154		AT3G11630	0.00360592	8.18436e-06
AT1G18140	0.0252657	0.000628356		AT4G27260	-0.00736722	0.00610335		AT3G15680	0.0248918	0.00313014		AT3G60415	0.00759274	0.00894813		AT3G21180	-0.00699161	8.18436e-06
AT3G45420	-0.0308152	0.000628356		AT4G17730	-0.00610884	0.0061242		AT3G22460	-0.0313852	0.00313014		AT1G69240	-0.00497535	0.00901081		AT5G55820	-0.00493415	8.22782e-06
AT1G05100	0.0372504	0.00063096		AT5G60100	-0.0151227	0.00615112		AT2G31880	-0.043461	0.00314032		AT5G49810	-0.00341724	0.00914099		AT4G25370	0.0029897	8.23263e-06
AT3G13000	-0.0208104	0.00063096		AT4G28080	0.0110616	0.00615224		AT1G75130	-0.0213962	0.00314594		AT4G25707	0.00539692	0.00916874		AT2G23780	0.00298891	8.28962e-06
AT1G55775	0.0227021	0.00063347		AT5G42530	-0.101561	0.00620749		AT3G05500	0.017804	0.00314594		AT4G21210	0.00501222	0.00917421		AT2G25910	0.00497177	8.31164e-06
AT1G62660	0.015236	0.000634201		AT2G28210	0.0254982	0.00624292		AT1G48000	-0.0409594	0.0031606		AT1G77520	-0.00432702	0.00917813		AT5G45380	-0.00786696	8.79194e-06
AT4G37240	-0.0323058	0.000637598		AT5G16110	-0.00846078	0.00629536		AT4G11310	-0.070868	0.00318871		AT2G40920	0.00344726	0.00917813		AT5G48940	-0.0051802	8.80342e-06
AT2G02580	-0.0436764	0.000680203		AT2G04805	0.0153618	0.00629778		AT4G35750	-0.0305876	0.00318871		AT5G49990	0.00295641	0.0092204		AT2G15390	-0.00567694	8.80741e-06
AT1G19660	0.0187794	0.000682137		AT1G26440	-0.00571233	0.00631925		AT1G10380	-0.025714	0.00319273		AT3G14415	0.00442055	0.0092235		AT2G01460	-0.00435296	8.91583e-06
AT3G13460	-0.00874902	0.000682137		AT5G01840	0.0113651	0.00632226		AT5G46760	-0.0204486	0.00321617		AT5G39410	-0.00264259	0.00932602		AT1G01790	-0.00423648	8.96521e-06
AT1G02500	-0.0166609	0.000683191		AT5G47390	-0.00719177	0.00634069		AT5G54280	-0.0176834	0.00327938		AT1G79860	-0.0102662	0.0093279		AT5G57220	-0.0123831	9.10948e-06
AT3G18040	0.0143053	0.000683742		AT3G62570	-0.0106759	0.00637397		AT1G54220	0.0206272	0.00330496		AT2G45830	0.00211317	0.0093279		AT2G18050	0.00643862	9.13576e-06
AT4G01070	0.0147424	0.000688183		AT1G32940	0.00886933	0.00639421		AT3G51710	-0.0325781	0.0033117		AT3G23910	0.00244544	0.0093279		AT5G27330	-0.00316229	9.13715e-06
AT1G68238	-0.0279814	0.000689616		AT3G60490	-0.0130086	0.00639421		AT5G17160	0.0144327	0.00332718		AT3G07273	0.00459983	0.00934371		AT1G70370	-0.00557195	9.15404e-06
AT3G28740	0.0749572	0.000689616		AT5G57100	-0.00769063	0.00639421		AT5G20350	-0.013428	0.00334304		AT2G29460	0.00487755	0.00936546		AT4G04470	0.00378584	9.17354e-06
AT2G01150	0.0153571	0.000690583		AT2G47950	0.0190018	0.00642811		AT1G27050	0.0290479	0.00334339		AT5G22280	0.00299483	0.00936546		AT1G71500	0.00505404	9.19402e-06
AT1G74710	0.0170264	0.000690835		AT5G54080	0.0063619	0.00642921		AT2G21270	0.0155705	0.00335379		AT4G35100	-0.00283685	0.00939483		AT5G14340	-0.0135932	9.19402e-06
AT3G46340	-0.0536208	0.000690835		AT1G11300	0.0131989	0.00649079		AT1G10230	0.0335704	0.00335755		AT3G30775	0.00502447	0.00943822		AT1G08230	0.00719518	9.31565e-06
AT3G01335	-0.0261205	0.000699192		AT3G09330	-0.0186384	0.00654037		AT5G20570	0.0208735	0.00336816		AT1G25450	-0.00360637	0.00944455		AT5G49270	-0.00716526	9.34152e-06
AT5G18270	0.0162555	0.000699192		AT1G15110	0.00519743	0.00656639		AT2G28590	0.0248921	0.00336889		AT5G57900	0.00298786	0.00946502		AT5G07460	-0.00324892	9.36609e-06
AT3G61380	-0.014531	0.00070678		AT5G12950	-0.00855551	0.00657743		AT5G10230	-0.0345082	0.00337156		AT2G46740	-0.00392045	0.00950374		AT2G43820	0.00497573	9.39576e-06
AT1G70980	0.0144463	0.000715721		AT3G10815	0.0138947	0.00659371		AT1G68530	0.0244813	0.00339113		AT2G21880	-0.0038632	0.00952327		AT3G08940	0.00588978	9.61079e-06
AT4G23493	0.0336133	0.000721897		AT4G08950	-0.0110567	0.00664643		AT3G57540	-0.0221576	0.00340913		AT1G64210	-0.00441745	0.0095655		AT1G13990	0.00436664	9.64471e-06
AT1G03980	-0.0434522	0.000722075		AT4G04450	-0.0125447	0.0066652		AT3G58630	0.0199918	0.00340913		AT1G02730	-0.00368151	0.00956815		AT3G15540	-0.0103632	9.69054e-06
AT2G18210	0.0315576	0.000730607		AT3G28690	-0.0049817	0.00668459		AT5G49660	-0.0157937	0.00340913		AT3G58610	-0.00191153	0.00956815		AT4G19700	0.00473343	9.71076e-06
AT1G72230	0.0261281	0.000731355		AT5G17520	0.00899097	0.00669217		AT5G62340	-0.0358621	0.00340913		AT1G16820	0.0066364	0.00957169		AT1G03010	-0.00908979	9.72509e-06
AT1G08763	0.0328888	0.000733589		AT5G48950	0.0137263	0.00669514		AT1G67280	-0.0178697	0.00341565		AT1G75620	-0.00537429	0.00957853		AT1G56200	0.00693168	9.72509e-06
AT5G54540	0.00966634	0.000750549		AT1G08440	0.050773	0.00670184		AT5G14120	-0.0259438	0.00341644		AT3G10970	0.00257807	0.00958393		AT3G05120	0.00434487	9.72509e-06
AT1G50630	0.0167824	0.000753548		AT1G07010	0.0156398	0.00670741		AT4G15290	-0.0416697	0.00342704		AT5G67330	0.00226461	0.00958393		AT5G58660	0.00930282	9.73282e-06
AT5G24105	0.0274679	0.000755923		AT1G06180	0.0070885	0.00678696		AT1G11310	-0.0223876	0.00347495		AT3G06530	-0.00398566	0.0097019		AT1G76100	0.0107876	1.01528e-05
AT1G28570	0.0300046	0.000759095		AT5G06200	0.00973479	0.00681526		AT1G31860	0.0180454	0.00350149		AT1G15330	-0.00705332	0.00971285		AT4G35220	0.00335366	1.01572e-05
AT1G27210	-0.0118219	0.000759765		AT5G16010	0.0114977	0.00681526		AT5G51790	-0.0321874	0.00350149		AT2G46630	-0.00350722	0.00971285		AT1G10410	0.0026959	1.0248e-05
AT1G28760	-0.0275994	0.000761132		AT5G17790	0.00703562	0.00681526		AT4G32300	-0.0145624	0.00350668		AT5G58650	0.00414812	0.00971285		AT4G05200	-0.00971323	1.03881e-05
AT2G47800	0.0188699	0.000761132		AT5G45070	0.00732494	0.00684932		AT1G75270	0.0168088	0.0035539		AT2G25450	0.00236967	0.00976468		AT4G30290	0.00302565	1.05103e-05
AT5G11420	0.0233409	0.000764744		AT5G18550	0.00624518	0.00685929		AT1G27320	-0.0189968	0.00359723		AT4G05010	0.0027504	0.00976468		AT4G09010	0.0082596	1.05791e-05
AT2G18550	0.0393607	0.000773696		AT1G11530	-0.013705	0.00686271		AT1G61750	-0.139553	0.00359723		AT5G51160	0.00350648	0.00976468		AT2G33255	0.00485277	1.05972e-05
AT4G05530	0.0153088	0.000774301		AT1G19000	-0.00549948	0.00686271		AT5G35750	-0.0215183	0.00359723		AT2G34500	-0.0042235	0.00980826		AT2G43620	0.0130433	1.06737e-05
AT3G06420	0.0209972	0.000774978		AT3G59850	0.0106237	0.0069314		AT3G07800	0.0302275	0.00359944		AT3G59765	0.00393366	0.00991904		AT1G19110	-0.00429026	1.07776e-05
AT1G30510	-0.0140743	0.000782752		AT3G13560	-0.00689205	0.00693976		AT1G30550	-0.0322912	0.00361237						AT1G72130	-0.00384589	1.08581e-05
AT1G76990	-0.0128038	0.000792695		AT1G11480	0.00459514	0.00698572		AT3G04110	-0.0266932	0.0036135						AT3G62140	0.0047712	1.09072e-05
AT2G47000	0.0120041	0.000809221		AT1G70560	0.00954165	0.00700065		AT5G17790	0.0179763	0.0036135						AT2G03720	-0.00898616	1.09299e-05
AT1G64620	-0.0227955	0.000810347		AT3G53160	0.0147374	0.00704039		AT1G69710	0.0404696	0.00361698						AT3G19710	-0.00702064	1.09299e-05
AT1G75520	-0.0302716	0.000810347		AT1G75270	0.00627111	0.00704105		AT1G20910	0.0204084	0.00362862						AT1G70330	-0.00585674	1.1024e-05
AT5G08570	-0.00763792	0.000811362		AT1G77630	-0.00964822	0.0070421		AT3G01510	0.0231535	0.00364476						AT4G03420	0.00469903	1.11285e-05
AT3G03170	0.0266348	0.00082385		AT5G23950	0.0161812	0.00704546		AT1G61600	-0.0248212	0.00365517						AT4G22950	-0.0113687	1.11839e-05
AT1G78570	0.00938305	0.000824408		AT2G01175	-0.0189706	0.00706503		AT3G08690	0.024114	0.00365517						AT5G38970	-0.00893228	1.1212e-05
AT1G65500	0.0307289	0.000827926		AT1G64850	0.007366	0.00709182		AT5G55760	0.0220929	0.00367957						AT5G14200	-0.00396205	1.14788e-05
AT5G06110	-0.00983635	0.000827926		AT3G49350	0.00606589	0.00711238		AT2G41650	0.0299495	0.00368172						AT1G66270	-0.00429193	1.15024e-05
AT1G22990	0.0166565	0.000846076		AT1G52140	-0.0107583	0.00713894		AT4G13850	0.0114435	0.00368172						AT3G46500	0.00703931	1.15062e-05
AT1G49600	-0.0113328	0.000846881		AT2G24820	0.0182072	0.00713894		AT1G55680	0.0108172	0.00369448						AT1G33265	0.00594359	1.15322e-05
AT1G67105	-0.0599898	0.000852972		AT3G17510	-0.00834544	0.00713894		AT3G13750	-0.0222128	0.00371081						AT1G44800	0.00429058	1.15765e-05
AT5G25350	-0.0165304	0.000852972		AT3G29430	-0.0170843	0.00713894		AT2G18300	-0.0711077	0.00372747						AT3G12120	0.00436464	1.15765e-05
AT2G37690	-0.0146229	0.00085466		AT4G07820	-0.0149762	0.00713894		AT3G23700	-0.0390607	0.00373753						AT2G02800	-0.00282008	1.17148e-05
AT1G49670	0.0104144	0.000858289		AT4G14740	-0.00921607	0.00713894		AT1G16390	-0.107477	0.00375536						AT2G43600	0.0109457	1.17148e-05
AT5G19240	0.0238909	0.000862521		AT4G17550	0.0107697	0.00713894		AT5G40450	-0.0335982	0.0037791						AT1G08340	-0.00541004	1.18312e-05
AT5G44910	-0.0177504	0.000862521		AT5G04250	0.00853927	0.00713894		AT4G36250	0.0186046	0.0038175						AT4G22240	0.0039883	1.1843e-05
AT1G21320	-0.0513552	0.000865825		AT5G66650	0.0104062	0.00715746		AT1G21450	-0.0169399	0.00381769						AT1G49660	-0.00314333	1.18552e-05
AT1G20190	0.0191977	0.000865993		AT1G19340	-0.0135522	0.00718201		AT3G45700	-0.0278155	0.0038221						AT2G23090	0.00525497	1.18569e-05
AT1G64380	0.0421132	0.000865993		AT3G51360	-0.0158732	0.0072376		AT1G72340	0.0212215	0.00383834						AT4G09500	0.00512214	1.1919e-05
AT1G80000	0.0147678	0.000874391		AT3G22970	-0.00606125	0.00725189		AT5G58330	-0.0269429	0.00383983						AT2G31010	-0.00444218	1.1972e-05
AT5G50300	-0.0189594	0.000874714		AT5G38020	0.00903016	0.00731444		AT3G55150	-0.0283141	0.00384757						AT5G50760	-0.00483238	1.1972e-05
AT3G14540	0.0309534	0.000875764		AT5G45280	0.00852867	0.00732871		AT3G04010	-0.0302975	0.00385036						AT4G40090	-0.00743087	1.20135e-05
AT5G61640	0.0216835	0.000879425		AT1G60270	-0.010426	0.00733465		AT5G66550	0.0267265	0.00385494						AT1G48670	0.00673779	1.20399e-05
AT4G00820	-0.0164029	0.000881591		AT2G28080	-0.00720607	0.00733465		AT1G75410	-0.0244827	0.00385821						AT3G43190	-0.00748657	1.22203e-05
AT1G01110	-0.0228085	0.000883007		AT3G05630	0.0135134	0.00733465		AT4G36360	-0.0110402	0.00387331						AT2G21188	0.00961248	1.22581e-05
AT5G57220	0.0237506	0.000883007		AT4G39260	-0.0107933	0.00733465		AT1G34750	-0.0217344	0.00387343						AT5G04130	-0.00431979	1.24395e-05
AT2G45300	-0.00927301	0.00089724		AT4G36830	0.0122525	0.0073516		AT2G47780	0.107755	0.00387343						AT4G32950	-0.0180441	1.24693e-05
AT3G10500	0.0108821	0.000913639		AT1G08040	0.00640293	0.00735321		AT4G31700	0.0121832	0.00390705						AT1G69510	0.00502836	1.2495e-05
AT3G17970	-0.0137277	0.000924441		AT1G23040	0.00818967	0.00741664		AT2G25355	0.0236087	0.00393233						AT4G02100	-0.00498996	1.2601e-05
AT3G51560	-0.0458045	0.000928085		AT4G00490	0.00763649	0.00741671		AT3G22740	-0.0528243	0.00394018						AT4G25220	-0.0157806	1.2601e-05
AT2G41480	0.0193409	0.000928789		AT3G07310	-0.00891552	0.00742484		AT5G58350	-0.0205578	0.00394655						AT1G17200	-0.0136022	1.26123e-05
AT2G43535	0.0181219	0.000943765		AT2G42350	-0.0113105	0.00744748		AT1G15430	0.0280895	0.00398941						AT1G03820	-0.00399434	1.27274e-05
AT3G23870	0.0249208	0.000957888		AT4G13750	-0.0106442	0.00752665		AT2G26840	0.0258335	0.00398941						AT5G15230	0.00420824	1.27274e-05
AT3G50830	0.0108286	0.000957888		AT5G10280	-0.00741534	0.00757549		AT2G38460	-0.0271688	0.00401285						AT1G26240	-0.0184838	1.27494e-05
AT1G03410	0.0372312	0.000962508		AT1G66830	0.0245128	0.00757978		AT1G75945	0.0343634	0.00406229						AT5G13990	-0.00577655	1.27821e-05
AT5G02400	-0.0163984	0.000976099		AT1G34340	-0.00611772	0.00759592		AT2G38580	0.0140878	0.00406758						AT2G47500	-0.00442388	1.3078e-05
AT2G38170	0.0130874	0.000979286		AT3G03180	-0.0115593	0.00767739		AT3G28345	-0.0210735	0.00406758						AT4G26750	0.00436809	1.3127e-05
AT4G13030	0.0159683	0.000979867		AT4G26750	0.00615387	0.00768032		AT3G61970	0.03621	0.00406758						AT1G64370	0.0038661	1.31327e-05
AT4G29410	-0.0102733	0.000979867		AT1G44050	-0.0330454	0.0077483		AT1G73390	-0.018926	0.00406937						AT2G18210	-0.00689738	1.31327e-05
AT3G58060	-0.0202472	0.000985248		AT1G19840	0.0106865	0.00775678		AT1G06080	0.0260841	0.00409429						AT4G27700	0.00690354	1.3142e-05
AT5G24530	0.0111738	0.000989092		AT1G22065	0.0117414	0.00775678		AT3G12100	0.0162124	0.00409429						AT3G50410	0.00577891	1.32481e-05
AT1G17745	0.0117398	0.000989121		AT3G14560	0.00783754	0.00775678		AT1G80860	0.0244887	0.00411084						AT1G64940	0.00669211	1.33073e-05
AT2G01900	-0.0247141	0.000989121		AT2G47890	-0.0053596	0.00779379		AT3G47080	0.0193229	0.00411166						AT2G44410	0.0033683	1.33175e-05
AT1G16300	-0.011904	0.000991289		AT1G71860	-0.00506571	0.00780829		AT4G39030	-0.0226966	0.00412024						AT5G42300	0.00683373	1.3379e-05
AT5G19520	-0.0136523	0.00099268		AT1G32900	0.0201102	0.00781981		AT5G67270	0.0230813	0.00412658						AT1G44160	0.0056314	1.34892e-05
AT4G37680	0.0133181	0.000994011		AT2G45170	-0.0124336	0.00781981		AT1G60940	-0.0176659	0.00413134						AT5G03370	0.00603752	1.36483e-05
AT2G35910	-0.0296146	0.000996911		AT2G08735	-0.025595	0.00783613		AT5G40010	-0.0334089	0.00414895						AT1G28140	0.00391613	1.3651e-05
AT3G20840	-0.0206594	0.00100194		AT2G42610	-0.030261	0.00783613		AT5G57420	0.0466633	0.00420314						AT1G32470	0.00804902	1.36704e-05
AT2G39990	-0.00672052	0.0010135		AT4G37010	-0.00868471	0.00783613		AT1G59730	0.0318399	0.00423672						AT1G68150	0.00485261	1.36704e-05
AT4G37180	0.0135538	0.00101595		AT1G70370	-0.00876353	0.00783761		AT3G14400	0.0121992	0.00423717						AT5G50250	0.00470773	1.37055e-05
AT4G14020	0.0229564	0.0010292		AT1G02950	-0.0330948	0.00787903		AT5G62880	0.021893	0.00427114						AT4G34590	0.00537441	1.37894e-05
AT1G11190	0.018498	0.00102943		AT2G24260	0.00761615	0.00787903		AT1G71030	-0.082338	0.00427789						AT2G34860	0.00730231	1.38509e-05
AT1G35140	-0.0473843	0.00103144		AT1G10680	0.0344528	0.00788653		AT4G37120	0.0106996	0.00431228						AT5G13580	-0.00618152	1.38886e-05
AT5G25250	-0.0179915	0.00103144		AT2G16230	-0.0134474	0.00791955		AT5G39100	0.0611004	0.00431371						AT3G44990	-0.00604459	1.40071e-05
AT1G13130	0.0273874	0.0010335		AT4G14650	-0.0112773	0.00791955		AT4G31350	0.0199459	0.0043245						AT1G22190	0.00532735	1.40137e-05
AT5G43850	0.0164655	0.00103451		AT3G19990	0.00670671	0.00805406		AT5G42240	-0.0222196	0.00434868						AT5G16450	0.00478246	1.41119e-05
AT3G23430	-0.01734	0.00104336		AT5G53820	-0.0203822	0.00807254		AT4G34750	0.0164148	0.00442525						AT2G01660	-0.00763537	1.41179e-05
AT1G30500	0.0187761	0.00104798		AT4G08570	0.00976309	0.0080832		AT2G43100	-0.0190798	0.00443467						AT2G21170	0.00309	1.41663e-05
AT3G60280	0.0291417	0.00105209		AT1G12140	0.00796877	0.00816141		AT3G12760	0.0158859	0.00446435						AT1G11655	-0.0200917	1.41751e-05
AT5G65020	0.0130345	0.00106225		AT1G69920	0.0207397	0.00816141		AT5G47810	-0.02339	0.00446435						AT5G13140	0.00607526	1.42682e-05
AT1G73300	0.0258142	0.00106231		AT2G40080	-0.0274358	0.00816141		AT3G09260	-0.0262761	0.00452195						AT1G54500	0.00879719	1.4424e-05
AT3G07070	0.0219831	0.00106676		AT1G19770	-0.0088097	0.00816724		AT5G39550	0.0209235	0.00456658						AT2G32990	-0.00487186	1.45704e-05
AT2G31790	-0.0137611	0.00107594		AT3G05030	0.00723084	0.00821225		AT4G00760	-0.0235153	0.00457983						AT3G11550	-0.00524995	1.47757e-05
AT1G53940	-0.0212863	0.00108067		AT5G64230	0.0112287	0.00821225		AT5G11170	0.012051	0.00458964						AT5G23920	0.00643622	1.4854e-05
AT1G51890	-0.0218716	0.00109061		AT5G50800	0.0140464	0.00827578		AT5G38900	-0.0246127	0.00458964						AT5G66600	-0.00501035	1.48631e-05
AT1G22490	-0.0299461	0.00109382		AT5G16190	-0.0145237	0.00828049		AT1G66960	0.0554861	0.00460133						AT3G11520	-0.00485619	1.49141e-05
AT2G47530	0.0277696	0.00109382		AT4G13550	0.0128565	0.00829954		AT3G44326	-0.0411674	0.00460133						AT3G45080	-0.0093343	1.49406e-05
AT4G30120	-0.021298	0.00109382		AT1G72720	0.0204529	0.00835592		AT3G14240	-0.0176004	0.00461348						AT5G23310	0.00527753	1.50606e-05
AT5G18830	0.00986382	0.00110138		AT3G47400	0.0106819	0.00837219		AT4G35780	-0.0161501	0.00461348						AT5G19200	0.00516456	1.50744e-05
AT1G55700	-0.0388589	0.00110983		AT1G75290	0.0124374	0.00845012		AT1G51830	-0.0189025	0.00463013						AT1G49320	0.00449911	1.51634e-05
AT3G45080	0.0237675	0.00112206		AT1G33700	0.00733368	0.00846105		AT5G07000	-0.0373202	0.00463697						AT5G50400	0.00388938	1.53583e-05
AT3G08510	0.0124159	0.00113306		AT5G57790	0.0110456	0.00851259		AT3G19210	0.0246902	0.0046405						AT2G01620	0.00676794	1.53651e-05
AT1G13550	-0.0364238	0.00113376		AT1G73810	0.00973208	0.00855447		AT1G44760	0.0226012	0.00465607						AT1G16320	0.00451758	1.5427e-05
AT5G46700	0.0155321	0.00114385		AT2G17036	-0.02133	0.00855447		AT4G11990	0.0409935	0.00467507						AT1G54100	0.0041507	1.55026e-05
AT4G27710	0.0152704	0.00116633		AT1G74590	0.0115839	0.00855662		AT5G02170	-0.031461	0.00468124						AT1G69310	0.00513178	1.55265e-05
AT1G48930	0.0174299	0.00116932		AT4G34650	0.0252217	0.00858927		AT2G46170	0.0171199	0.00472318						AT2G29380	0.0255156	1.55642e-05
AT1G09400	-0.0409279	0.00117199		AT5G54160	0.00720458	0.00859719		AT2G32990	-0.0109983	0.00473515						AT1G77030	-0.00516625	1.5604e-05
AT5G60890	0.0255835	0.00117281		AT5G61570	-0.011446	0.0086468		AT2G47680	0.0333431	0.00473659						AT4G24020	-0.00304494	1.56988e-05
AT2G26660	0.0133898	0.00117991		AT1G72820	-0.00912724	0.00867143		AT3G06350	0.0115871	0.00473659						AT1G57980	-0.0101933	1.57168e-05
AT2G16980	0.0194616	0.0011827		AT2G40150	-0.0100674	0.00867143		AT5G01520	-0.0228597	0.00474716						AT2G40360	-0.00287655	1.57589e-05
AT5G20250	-0.0186698	0.00118554		AT2G29990	0.00645411	0.00867865		AT5G14180	-0.037996	0.00477935						AT3G50150	-0.0127408	1.58344e-05
AT5G51060	-0.0155119	0.00118554		AT5G24870	0.00719481	0.00869564		AT2G46610	0.0384694	0.00478077						AT3G52970	-0.0284047	1.58344e-05
AT5G59290	0.00813421	0.00118554		AT3G26040	-0.0149293	0.00872396		AT2G24680	0.0346859	0.00478191						AT4G11190	-0.00804832	1.58344e-05
AT4G27840	0.020424	0.00120332		AT1G20440	0.00614161	0.00876813		AT1G49650	-0.0385841	0.00479486						AT1G66240	0.00605559	1.58381e-05
AT5G43040	-0.0216692	0.00120377		AT4G38410	0.0156707	0.00876813		AT3G16390	-0.0290449	0.00480236						AT2G45960	0.00317824	1.58671e-05
AT4G16760	0.0115786	0.00122512		AT4G36260	-0.0119352	0.00877113		AT3G09480	0.0374131	0.00480507						AT1G78440	-0.00960681	1.59944e-05
AT3G62590	0.0231487	0.00122546		AT3G12150	-0.00816414	0.00879452		AT4G31290	0.0287092	0.00480507						AT4G02590	0.00248105	1.60351e-05
AT2G26670	0.0137117	0.00122698		AT5G24410	-0.0127818	0.00881228		AT3G50760	0.0231281	0.00480715						AT1G66970	-0.0120889	1.61359e-05
AT4G31860	0.0128114	0.00122904		AT2G17650	-0.0128056	0.0088449		AT3G54010	0.0105085	0.0048284						AT1G65970	0.00955411	1.61364e-05
AT1G68450	-0.0305884	0.0012306		AT4G23590	0.0128065	0.0088449		AT1G47570	0.0170642	0.00484323						AT2G27680	0.00485112	1.61603e-05
AT5G57010	0.0211455	0.00123658		AT3G23800	-0.0128841	0.00884956		AT2G14820	-0.0262794	0.00485305						AT4G02890	0.00335281	1.62455e-05
AT1G27300	0.0148037	0.00123801		AT4G30600	0.00481101	0.00886565		AT4G14103	0.0303397	0.00485349						AT1G50630	0.0048794	1.62603e-05
AT2G29995	-0.0151971	0.00123822		AT1G02390	0.0149208	0.00888853		AT3G16450	-0.022714	0.00485535						AT3G07420	-0.00520726	1.62681e-05
AT4G39955	0.0144409	0.00124598		AT5G05870	0.00849171	0.00888853		AT5G55550	0.0136666	0.00487926						AT1G68795	0.00526756	1.6289e-05
AT5G41190	-0.00998519	0.00124716		AT3G23250	0.0193741	0.00893888		AT5G05140	-0.0124533	0.00487955						AT1G75690	0.00916601	1.66721e-05
AT1G56550	0.0167656	0.00125098		AT1G80110	0.00980673	0.00900016		AT3G27490	-0.0809295	0.00488517						AT5G10990	0.00855139	1.67287e-05
AT2G25310	0.0113808	0.00125471		AT1G14580	-0.0123912	0.00901463		AT3G23830	0.0190568	0.00490934						AT5G47990	-0.00907111	1.67936e-05
AT2G35760	0.0190026	0.00125471		AT2G01490	0.00596873	0.00901775		AT3G17390	0.0231868	0.00492881						AT3G15780	0.00944038	1.69318e-05
AT3G22660	-0.0146216	0.00125471		AT3G22400	-0.00887581	0.00902138		AT2G30660	-0.105252	0.00493063						AT4G32070	-0.00579822	1.70314e-05
AT4G37030	-0.0254518	0.00126508		AT2G14080	-0.0254385	0.00903228		AT1G31600	0.0134485	0.00493392						AT4G19810	0.00665809	1.70828e-05
AT2G14920	-0.0318692	0.00128032		AT3G54500	0.00854223	0.00903228		AT1G68825	0.0453131	0.00493392						AT3G21190	-0.00551172	1.71182e-05
AT1G73340	0.0217225	0.00129183		AT5G10990	0.0163604	0.00905892		AT1G13620	0.0528324	0.00494223						AT5G01720	-0.0035145	1.71529e-05
AT5G27730	0.0152373	0.00129183		AT2G36410	-0.00802621	0.00906541		AT2G05510	-0.0147085	0.00494848						AT1G26550	0.00388724	1.72511e-05
AT4G32180	0.00789922	0.00131234		AT4G34220	0.00879222	0.00908004		AT1G14240	-0.0267248	0.00495395						AT5G38710	-0.00705148	1.72511e-05
AT1G18860	-0.0214079	0.00131875		AT1G17840	0.0135124	0.00921343		AT1G67560	-0.0177369	0.00498659						AT1G20720	-0.00638742	1.73024e-05
AT5G25610	0.0251064	0.00133603		AT4G24110	0.0202932	0.00921343		AT4G34980	-0.0143928	0.00499474						AT2G23340	0.00727591	1.7358e-05
AT1G47490	-0.00933924	0.00135308		AT2G01260	-0.00657448	0.00923165		AT5G07870	-0.0312926	0.00503442						AT1G63600	-0.0142284	1.73886e-05
AT1G64670	-0.0364942	0.00135448		AT1G33600	0.0211717	0.00925748		AT2G18210	-0.032677	0.0050361						AT3G59110	-0.00407786	1.73886e-05
AT1G24485	-0.0520593	0.00135521		AT5G57330	0.00453662	0.00928463		AT1G31170	0.0328501	0.00505425						AT2G42840	-0.00827934	1.74356e-05
AT1G08040	0.011821	0.00136387		AT4G37700	-0.013922	0.00935116		AT5G12080	0.01587	0.00505425						AT5G10860	0.00430165	1.77544e-05
AT1G26410	0.0399002	0.00136387		AT3G51430	0.00705349	0.00939471		AT5G19740	-0.0211878	0.00505425						AT1G29660	-0.0100789	1.77736e-05
AT2G35585	0.0207395	0.00136387		AT1G51800	-0.0086923	0.00945308		AT5G15550	0.0130251	0.00505431						AT3G57300	-0.00505647	1.77788e-05
AT5G24960	-0.0196201	0.00137083		AT1G55390	-0.0208423	0.00948148		AT2G39660	0.01398	0.005063						AT3G62680	-0.00822526	1.77788e-05
AT2G03980	0.0338083	0.00137562		AT1G47570	0.00881997	0.00948991		AT5G47240	-0.0324289	0.00507561						AT4G16330	0.00504084	1.78028e-05
AT3G47980	-0.02185	0.00137842		AT1G22030	-0.00853464	0.00953414		AT2G21840	-0.0219744	0.0051173						AT5G13420	0.00297102	1.79625e-05
AT4G20210	-0.0178966	0.00137842		AT3G53560	0.00776317	0.00956261		AT5G01650	0.0312644	0.00514829						AT1G78490	0.00445111	1.79999e-05
AT3G14060	0.0343148	0.00139136		AT4G26560	-0.0357232	0.00956261		AT5G55540	-0.0161207	0.00514829						AT3G56400	-0.0152738	1.82366e-05
AT5G57123	0.0520127	0.00139136		AT4G22570	-0.0107464	0.00961434		AT2G02880	0.026426	0.00515957						AT2G05160	-0.0081902	1.82711e-05
AT5G62420	0.021686	0.00139145		AT1G75640	-0.00957264	0.00966607		AT3G16800	-0.0196133	0.0051776						AT5G10290	-0.00341574	1.83045e-05
AT2G47160	-0.0158138	0.00140007		AT1G14350	-0.00796391	0.00968367		AT3G15940	0.0119604	0.0051938						AT3G57660	-0.00424214	1.83825e-05
AT2G28570	-0.0203137	0.00141555		AT3G21420	0.00973601	0.00968367		AT4G14370	-0.0335471	0.00520544						AT4G17370	0.00493287	1.83995e-05
AT3G25820	0.0728064	0.00141555		AT1G60740	0.0113901	0.00968846		AT5G14250	0.0192512	0.00520544						AT5G63370	-0.00292815	1.84538e-05
AT1G16130	0.0211529	0.00141904		AT1G34540	0.0261731	0.00970307		AT2G36090	0.0273995	0.0052416						AT1G21270	-0.016907	1.8497e-05
AT2G41240	-0.0272919	0.00141904		AT3G22420	0.0128915	0.00974675		AT1G56540	-0.058617	0.00530713						AT1G15670	0.00609271	1.85512e-05
AT5G04540	-0.0135978	0.00141904		AT5G62220	0.00685051	0.00978753		AT4G16141	0.0222304	0.00530713						AT4G32600	0.00346714	1.85994e-05
AT5G03390	-0.0339795	0.00142007		AT2G40800	0.00590065	0.00978785		AT5G48410	-0.0214852	0.00530713						AT3G01990	-0.00928036	1.86774e-05
AT1G14260	-0.030678	0.00142043		AT3G07720	-0.0100452	0.00978785		AT4G28850	-0.0627155	0.00530948						AT3G42640	-0.00404896	1.88355e-05
AT4G04470	0.0138626	0.00142079		AT1G65570	0.0220961	0.00978819		AT3G19000	0.0201278	0.00531379						AT3G21352	-0.0161112	1.90298e-05
AT4G35100	0.0118608	0.00142885		AT4G33610	-0.0130284	0.00979634		AT4G21120	-0.0370192	0.00535944						AT5G59250	0.00421631	1.92322e-05
AT1G23210	0.0463024	0.0014296		AT3G04520	0.00779462	0.009834		AT2G37470	0.0283365	0.00537197						AT1G21550	-0.0137233	1.92419e-05
AT3G59900	-0.0314705	0.00143246		AT1G53560	0.0163496	0.00989299		AT3G06210	-0.0167092	0.00539662						AT5G42890	0.00437102	1.92419e-05
AT5G16750	-0.0154332	0.00143994		AT1G78960	0.00644753	0.00994202		AT1G11190	-0.0251179	0.00539793						AT4G17785	-0.0116585	1.9435e-05
AT5G58860	0.0232494	0.00145079		AT3G04720	0.0115974	0.00995541		AT1G72890	-0.0408764	0.0054288						AT3G50840	-0.00579957	1.94753e-05
AT2G27550	0.021333	0.00146639		AT5G49620	-0.0267695	0.00998927		AT4G12470	0.0938265	0.0054288						AT3G60300	0.00618569	1.95535e-05
AT1G18850	-0.016481	0.00146792						AT5G10480	0.0125697	0.00544097						AT1G50010	-0.00249389	1.95945e-05
AT3G43110	0.0253702	0.00148393						AT5G44380	-0.0169076	0.00544105						AT5G44574	0.0123436	1.95945e-05
AT4G33730	0.0275634	0.00148393						AT2G18640	-0.0843531	0.00545381						AT5G67140	0.00525958	1.96008e-05
AT1G08570	0.0109805	0.00148661						AT3G27350	-0.0139562	0.00551083						AT1G78850	-0.00460844	1.96723e-05
AT1G28660	0.0353062	0.00148661						AT3G50070	0.025832	0.00551083						AT3G51890	0.00498623	2.02136e-05
AT2G34190	-0.0156048	0.00150657						AT1G70290	-0.0520364	0.00553227						AT2G25150	-0.0111655	2.02298e-05
AT4G00430	0.0178348	0.00150657						AT1G52370	0.0193479	0.00555167						AT5G11210	-0.00692127	2.05468e-05
AT4G20050	0.0245602	0.00150657						AT4G01890	-0.0601052	0.00556281						AT2G03510	0.00326301	2.06894e-05
AT1G58030	0.0137808	0.0015141						AT4G35440	-0.0437225	0.00560348						AT5G04750	0.00632005	2.07181e-05
AT5G63600	-0.017142	0.00151582						AT2G35520	0.0239986	0.00560415						AT1G49720	0.00625353	2.0784e-05
AT3G59930	0.0523804	0.00152685						AT3G51490	0.0359913	0.00561044						AT5G60490	-0.00777706	2.0784e-05
AT5G23530	0.0200444	0.0015285						AT1G07150	-0.0354183	0.00562645						AT1G46554	0.00859631	2.08061e-05
AT3G12710	0.0174677	0.00153161						AT5G04370	-0.038746	0.00562645						AT1G63180	-0.0111827	2.08141e-05
AT2G26370	0.0324504	0.00153242						AT4G16146	0.0329644	0.00563113						AT4G35550	0.00470372	2.0901e-05
AT1G75030	0.0467305	0.00153253						AT1G13590	0.033308	0.00564581						AT3G23620	-0.00316402	2.09657e-05
AT1G07690	-0.0646105	0.00153297						AT4G39860	0.0219888	0.00566273						AT5G15780	0.0191013	2.10102e-05
AT1G10300	-0.0357088	0.001539						AT1G51800	-0.0242094	0.00566963						AT2G01910	-0.00381152	2.12694e-05
AT5G65090	0.0185528	0.00154428						AT5G45380	-0.0254217	0.00568941						AT5G64080	0.00710299	2.16742e-05
AT2G36400	-0.0158895	0.00154474						AT5G67160	-0.0272659	0.00572719						AT5G38700	0.00987953	2.17473e-05
AT4G38080	0.0177453	0.00155857						AT5G08380	-0.0249575	0.00573219						AT5G14760	-0.00743818	2.17754e-05
AT3G43670	0.0121981	0.0015599						AT5G61770	0.0170797	0.00573219						AT5G55560	0.00452141	2.19044e-05
AT4G24060	-0.0135226	0.00156078						AT5G65080	0.0622414	0.00573219						AT1G75330	0.00244643	2.21722e-05
AT3G10050	-0.0137219	0.00157104						AT1G30510	0.0164586	0.00574271						AT2G40480	-0.00431552	2.21722e-05
AT5G23870	0.019031	0.00157552						AT2G41640	-0.0263792	0.00574671						AT1G52905	0.00647932	2.22528e-05
AT5G23990	-0.0369657	0.00158642						AT5G61020	0.00974777	0.00574671						AT5G60730	-0.0071346	2.24468e-05
AT5G59530	0.0172026	0.00159523						AT5G61030	0.013844	0.00577774						AT4G37490	-0.00543666	2.25595e-05
AT3G62730	0.0273489	0.00160498						AT1G65860	-0.0440826	0.00583046						AT3G08690	0.00497624	2.26248e-05
AT5G22890	-0.0423006	0.0016089						AT1G70950	0.0184687	0.00585067						AT1G75350	0.00532049	2.28022e-05
AT2G37440	0.0114022	0.00161492						AT1G75620	-0.0376495	0.00585918						AT2G41780	0.00511841	2.28503e-05
AT1G02850	0.0268809	0.00162162						AT3G26330	-0.0295638	0.00586113						AT4G36648	-0.00336792	2.29559e-05
AT1G19485	-0.0125871	0.00163793						AT5G54090	-0.0325338	0.005906						AT2G15620	0.00549784	2.30583e-05
AT2G48140	0.0229361	0.00164617						AT2G39020	0.0164146	0.00594395						AT1G79950	-0.00352691	2.35066e-05
AT2G21610	0.0417301	0.00165805						AT2G20030	-0.0422905	0.00601008						AT3G12320	0.00544803	2.37011e-05
AT5G06510	0.0360186	0.00166894						AT4G25610	0.0172166	0.00602504						AT5G07080	-0.00823713	2.37793e-05
AT5G37690	0.0141834	0.00166971						AT3G10250	-0.0164295	0.00606557						AT3G01900	0.00897328	2.40425e-05
AT5G17000	0.0201432	0.00167376						AT5G14040	0.0116347	0.00611859						AT4G16760	0.00339761	2.41404e-05
AT5G08620	-0.0123065	0.00167891						AT1G72010	-0.0128987	0.00614002						AT5G15580	-0.00337291	2.41429e-05
AT2G26570	0.0118777	0.0016835						AT5G03560	0.0256759	0.0061831						AT2G40110	-0.00443997	2.41447e-05
AT1G72430	-0.0181489	0.00169726						AT1G68880	0.0235899	0.00618713						AT3G58120	-0.00423281	2.48528e-05
AT1G45201	0.0204516	0.00170179						AT1G75400	0.0157284	0.00619468						AT4G14650	-0.00703202	2.51915e-05
AT1G59780	-0.0192381	0.00170309						AT3G04060	-0.0229899	0.00619743						AT5G61440	-0.00756885	2.53807e-05
AT1G75840	0.0125746	0.00170563						AT5G04040	-0.0166018	0.00621347						AT3G02530	-0.00336748	2.54453e-05
AT1G49100	-0.0443308	0.00170736						AT5G61550	-0.0248286	0.00623602						AT5G56680	-0.00331808	2.54737e-05
AT2G22780	0.00766064	0.00173045						AT1G33390	0.0142416	0.0062647						AT4G21860	0.00574687	2.54913e-05
AT3G26610	-0.0209837	0.00173045						AT3G62260	-0.0182473	0.00627174						AT2G39370	0.00603527	2.57972e-05
AT5G20640	-0.0385298	0.00173045						AT1G03660	-0.0656006	0.00632209						AT1G52750	-0.00407397	2.59422e-05
AT1G08903	0.0204559	0.00174638						AT1G74310	-0.0202473	0.00636288						AT4G22740	0.00377525	2.61367e-05
AT1G10550	0.019944	0.00175592						AT5G42310	-0.0227453	0.0063895						AT4G33510	0.00335085	2.62332e-05
AT4G31240	0.0157879	0.00175654						AT1G02460	0.0356872	0.00643886						AT2G16660	0.00501478	2.62368e-05
AT1G17340	0.0164303	0.00176643						AT1G03270	0.0267434	0.00644693						AT3G15510	0.00651119	2.63779e-05
AT4G32720	-0.0130151	0.00177294						AT3G48660	0.0455473	0.0064555						AT4G27130	0.00562047	2.64689e-05
AT5G07860	0.0265206	0.00178113						AT5G48450	0.0237015	0.0064555						AT4G36530	0.00668805	2.64689e-05
AT1G07560	-0.0214003	0.00179169						AT3G55520	0.0217365	0.00648311						AT5G53880	0.00849444	2.64689e-05
AT3G04910	0.00887725	0.00179169						AT5G48657	-0.0249221	0.00648311						AT4G12620	-0.00590805	2.6533e-05
AT2G33830	0.0217191	0.00179832						AT5G53400	0.0143541	0.00648311						AT2G14050	-0.00646257	2.66727e-05
AT1G72180	0.0163423	0.00179996						AT4G21865	0.0287003	0.00650233						AT3G16370	-0.00748558	2.67958e-05
AT4G34710	0.0146562	0.00180549						AT1G17840	0.0221238	0.00651678						AT3G48000	0.00427052	2.68627e-05
AT1G06840	-0.0152885	0.00180779						AT1G08320	-0.0195475	0.00653287						AT4G36060	0.00537399	2.68978e-05
AT1G75290	0.0243549	0.0018097						AT4G28440	0.0155936	0.00653287						AT3G59350	-0.00352645	2.69176e-05
AT2G21900	-0.0307012	0.0018097						AT3G14680	-0.0172524	0.00655278						AT1G15790	0.006473	2.72203e-05
AT1G62305	0.0186812	0.00181159						AT2G43500	0.02146	0.00657707						AT1G79710	-0.0052293	2.72477e-05
AT1G14520	0.0374503	0.00181237						AT3G51540	-0.0235753	0.00657707						AT2G04700	0.00496189	2.73442e-05
AT5G10210	-0.0254018	0.00181284						AT3G51840	-0.0139464	0.00657707						AT3G18130	-0.00357983	2.73675e-05
AT1G53680	0.0184264	0.00181839						AT4G16230	0.0552739	0.00657707						AT3G54500	0.00413313	2.75421e-05
AT5G44820	0.0303577	0.00181839						AT4G29080	-0.0213016	0.00657707						AT3G22890	-0.00452394	2.7545e-05
AT2G16230	-0.0302271	0.00182223						AT4G08900	-0.0193024	0.00663341						AT1G01453	-0.0201291	2.76977e-05
AT2G46600	0.0171785	0.00182223						AT2G38390	-0.0222509	0.0066429						AT5G47880	0.00338721	2.77098e-05
AT4G11570	0.0138402	0.00182223						AT5G62165	-0.0298746	0.00666025						AT5G05960	0.00522659	2.81505e-05
AT5G16900	-0.0208867	0.00182223						AT5G27750	0.021101	0.00666554						AT1G71950	0.00592742	2.84329e-05
AT2G18370	0.0179922	0.00182381						AT5G61820	-0.0139184	0.00666554						AT4G24670	-0.00941928	2.84546e-05
AT3G54650	-0.0131936	0.00182674						AT5G45650	-0.0368616	0.00669812						AT2G15370	-0.00521779	2.85106e-05
AT1G76650	-0.0510913	0.00183006						AT4G36060	-0.0311305	0.006706						AT4G37010	-0.00497832	2.85993e-05
AT1G35720	0.0131801	0.00183161						AT1G65950	0.0164316	0.00671652						AT4G28730	0.00495228	2.88573e-05
AT2G31081	-0.0411883	0.00185804						AT1G78950	-0.0354336	0.00671734						AT1G69770	-0.00437222	2.90895e-05
AT3G27210	0.0133869	0.00185804						AT4G13110	-0.0293786	0.0067211						AT1G49010	0.0155031	2.91161e-05
AT2G44280	0.0246667	0.00186422						AT1G22330	-0.0237389	0.00674278						AT2G03440	-0.00384509	2.91161e-05
AT3G17465	-0.0119172	0.00186422						AT2G16380	-0.071735	0.00682925						AT4G15760	-0.00395628	2.91161e-05
AT2G14750	0.0108241	0.00186673						AT3G29410	-0.0245779	0.00686275						AT5G47570	0.00535024	2.92402e-05
AT1G79620	0.0137538	0.00187575						AT1G06350	0.0400991	0.00688552						AT2G23290	-0.00739493	2.95086e-05
AT5G44550	0.0220591	0.00188147						AT5G63920	0.0183835	0.00688552						AT3G01680	-0.00427793	2.97963e-05
AT5G61500	0.0099718	0.00189082						AT1G12200	-0.028967	0.00688812						AT3G10340	-0.00303639	3.00073e-05
AT4G21990	0.0140671	0.00193643						AT3G17770	-0.0135149	0.00693936						AT3G59280	0.00345081	3.04241e-05
AT1G80470	-0.0543278	0.00193667						AT3G21340	-0.056868	0.00694696						AT1G04330	-0.0121068	3.04472e-05
AT2G21045	-0.018014	0.00193961						AT4G04955	-0.0153571	0.00697795						AT2G24600	0.0121364	3.07791e-05
AT1G03860	-0.00889019	0.00194763						AT3G12977	-0.0274272	0.00698122						AT1G13830	0.00527969	3.07997e-05
AT2G02800	-0.0117191	0.00194763						AT5G17540	0.0443244	0.00698122						AT3G51680	-0.0153136	3.08518e-05
AT2G29130	0.0186922	0.00194763						AT5G06000	0.0244541	0.00701229						AT1G66500	0.00549347	3.09859e-05
AT3G02530	-0.00750537	0.00194763						AT2G34355	-0.0265428	0.00701569						AT2G28110	0.00505136	3.11112e-05
AT3G62870	-0.0080033	0.00194973						AT1G15890	-0.0338511	0.00702097						AT5G15830	0.00681074	3.11663e-05
AT1G76580	0.0122878	0.00196195						AT5G57280	0.0195694	0.00702097						AT2G38450	0.00546528	3.11959e-05
AT5G35190	0.0244801	0.00196843						AT5G19380	0.021205	0.00702558						AT1G15380	0.00720335	3.12946e-05
AT4G29800	0.0190921	0.00198074						AT5G39660	-0.0275468	0.00704237						AT5G23000	0.00665088	3.12946e-05
AT5G44030	0.0127883	0.00198245						AT5G09250	0.0218898	0.00704939						AT4G38062	-0.00671361	3.14494e-05
AT5G62310	0.020619	0.00200075						AT5G63135	0.0258563	0.00704939						AT1G70780	0.00373883	3.17095e-05
AT5G39570	0.00796973	0.0020026						AT3G27360	0.0319514	0.00708241						AT2G01070	-0.00317543	3.17313e-05
AT5G21080	0.0325467	0.00200688						AT1G70370	-0.0173986	0.0070926						AT5G17170	0.0125187	3.17313e-05
AT5G60720	0.0192175	0.00202888						AT2G21560	-0.0325106	0.00711715						AT1G72430	-0.00651224	3.17335e-05
AT3G15990	0.0183696	0.00203502						AT1G53780	0.0179702	0.00713466						AT1G11670	-0.00450456	3.17855e-05
AT4G16957	-0.0208967	0.00204694						AT2G22470	0.0273016	0.00713466						AT5G01200	0.00731211	3.19732e-05
AT4G31290	-0.0154457	0.00209686						AT2G27500	-0.0271594	0.00713466						AT4G37060	-0.0154082	3.19894e-05
AT1G58110	-0.012281	0.00209758						AT2G44450	-0.0200734	0.00713466						AT5G05600	-0.0046228	3.24085e-05
AT4G02890	0.00770245	0.00209972						AT2G32765	0.0562442	0.00714341						AT1G18860	0.0041157	3.24764e-05
AT5G07322	0.0204947	0.00210461						AT5G57330	0.0124077	0.00716701						AT1G71410	-0.00320373	3.27882e-05
AT1G72680	0.0161918	0.00211449						AT1G54270	0.0139507	0.00718644						AT4G39940	-0.00739315	3.30096e-05
AT3G14620	0.0394195	0.00211449						AT2G20280	0.0143446	0.007201						AT1G23060	0.0061017	3.32731e-05
AT5G05600	0.0202285	0.00212348						AT5G22850	-0.0157439	0.00725909						AT3G60490	-0.00589823	3.3366e-05
AT2G24420	0.0088075	0.00214097						AT3G21180	-0.0258859	0.00729463						AT5G14285	0.00476397	3.3467e-05
AT1G28190	0.023633	0.00216675						AT1G54690	0.0363861	0.00731902						AT2G47600	0.00410277	3.35375e-05
AT3G14980	0.0153651	0.00218748						AT1G61560	-0.0328907	0.00731902						AT4G35450	0.00232065	3.37331e-05
AT4G31450	0.0129758	0.0022024						AT3G27630	0.0623712	0.00731902						AT4G33110	0.00839043	3.3854e-05
AT2G40970	-0.0137194	0.00221127						AT5G27350	-0.0307096	0.00731902						AT4G28150	0.00745273	3.43738e-05
AT2G45180	-0.0334129	0.00223588						AT5G51670	-0.0145424	0.00731902						AT1G32060	0.00999137	3.46757e-05
AT1G68200	0.029249	0.00223855						AT3G59730	-0.0460346	0.00733509						AT4G20150	0.00476634	3.46796e-05
AT4G13890	-0.022887	0.0022444						AT1G78420	0.011982	0.00734276						AT4G18580	0.00458064	3.46861e-05
AT3G51090	0.0175913	0.00225181						AT4G09760	-0.02909	0.00736099						AT4G13420	-0.017165	3.48179e-05
AT3G59760	0.00829452	0.0022708						AT1G23390	-0.0329351	0.00736958						AT3G52800	0.00414149	3.51828e-05
AT1G01140	0.0243295	0.00227796						AT2G32800	-0.0194064	0.00737224						AT5G43760	-0.00325323	3.55287e-05
AT2G22190	0.0222746	0.00228282						AT5G40860	0.0344512	0.00740455						AT3G26080	0.00687279	3.61562e-05
AT3G10340	0.0188425	0.00229211						AT4G35180	-0.0803051	0.0074235						AT4G28370	-0.00409693	3.64807e-05
AT1G33612	-0.0214382	0.00229777						AT5G25120	-0.0334167	0.00744835						AT3G61740	-0.00489803	3.68724e-05
AT5G27150	0.0109225	0.00229939						AT1G07790	0.0257643	0.00746043						AT2G35980	-0.00712788	3.68845e-05
AT1G09090	-0.0179594	0.00230299						AT3G23910	0.0160732	0.00746043						AT2G43650	-0.00257561	3.68845e-05
AT5G56160	0.0165504	0.00230843						AT2G30740	-0.0138506	0.00748422						AT3G12860	-0.00588115	3.68845e-05
AT3G27070	-0.0169649	0.00230877						AT1G80300	-0.0124259	0.0074976						AT4G31820	-0.00656042	3.70419e-05
AT3G50130	0.0219758	0.0023113						AT4G21070	0.0291301	0.0074976						AT5G13770	0.00915863	3.70677e-05
AT2G45290	-0.010479	0.00231141						AT1G72700	-0.0195581	0.00753443						AT1G09270	-0.00343462	3.73813e-05
AT1G78410	0.0460359	0.00236819						AT4G15740	-0.050282	0.00753443						AT3G46000	0.0028523	3.73813e-05
AT3G20810	-0.0308068	0.0023812						AT3G05550	0.0489325	0.00757611						AT4G14220	0.00393315	3.73956e-05
AT1G70790	0.0185944	0.00238176						AT3G06380	-0.0221567	0.00757919						AT2G17650	-0.00792027	3.76038e-05
AT4G22666	0.0187002	0.00238176						AT2G21870	-0.00788868	0.00763693						AT3G03280	0.0086221	3.79824e-05
AT1G17360	0.0182585	0.00238948						AT5G07080	-0.0486783	0.00764315						AT3G60180	0.00592596	3.82487e-05
AT1G67000	0.0436621	0.00239032						AT4G29840	0.0133326	0.00764706						AT1G33240	-0.0034152	3.82834e-05
AT2G30140	0.0287125	0.00239032						AT5G58340	-0.0257921	0.00771427						AT3G15020	0.00353898	3.82834e-05
AT2G27285	0.0123562	0.00240267						AT1G20580	0.0215477	0.00774543						AT3G16840	-0.00279986	3.85128e-05
AT1G67300	0.01113	0.00240282						AT5G47740	-0.0310226	0.00777339						AT1G30970	-0.0053121	3.86161e-05
AT1G20490	0.0307828	0.00240708						AT5G10380	-0.107472	0.00781769						AT4G03200	0.00328656	3.86786e-05
AT4G04890	-0.0248619	0.00240708						AT4G25850	0.0379331	0.00782071						AT2G48090	0.0065856	3.92422e-05
AT5G50400	0.0154853	0.00240708						AT1G20930	0.0206393	0.00783577						AT1G67940	0.00453816	3.92698e-05
AT5G61650	0.0392878	0.00240708						AT5G60700	0.0130197	0.00789978						AT5G64390	-0.00589107	3.93688e-05
AT5G39580	-0.0190092	0.0024139						AT4G34710	-0.0209424	0.00790422						AT4G19660	-0.00325184	3.93991e-05
AT5G43270	-0.015047	0.00241506						AT2G02360	-0.0217319	0.00801511						AT1G29950	-0.00433588	3.94041e-05
AT2G14720	0.00761218	0.00243398						AT4G39675	-0.0501006	0.00801511						AT5G11440	-0.00853662	3.95817e-05
AT1G13990	0.015041	0.00244498						AT4G20480	0.0208884	0.00803677						AT1G51700	0.00549086	3.96809e-05
AT3G51000	0.0116194	0.00244498						AT5G50200	0.0256687	0.00808802						AT3G10310	-0.0046207	3.9717e-05
AT1G47610	0.0474544	0.00246181						AT5G22440	0.013455	0.00811486						AT1G08970	0.00341273	4.00708e-05
AT1G51850	-0.0200774	0.00246181						AT2G37860	0.0151839	0.00815212						AT5G07995	0.0198298	4.01597e-05
AT5G14760	-0.0315813	0.00246181						AT1G80960	0.0251538	0.00815857						AT4G09990	-0.0055152	4.05067e-05
AT3G60750	-0.0138168	0.00246303						AT1G20860	-0.129162	0.0081637						AT3G50140	-0.0146109	4.06668e-05
AT4G33250	-0.00630133	0.00246771						AT1G29800	-0.0186366	0.00824449						AT4G00430	0.00417066	4.10643e-05
AT3G07000	-0.0237047	0.00248791						AT5G10390	0.0222936	0.00824449						AT5G67370	0.00520029	4.10643e-05
AT3G29630	0.0204752	0.00249049						AT2G38810	0.027939	0.00828141						AT5G65575	0.00823897	4.12496e-05
AT1G55850	0.0175273	0.00249524						AT5G23840	-0.029355	0.00831231						AT4G36210	0.00360827	4.13594e-05
AT5G43520	-0.0198883	0.00251245						AT5G43470	-0.0569159	0.00834498						AT4G16500	0.00465544	4.16837e-05
AT4G00200	0.0172563	0.00254837						AT5G42250	-0.0164244	0.00835477						AT4G22150	0.00438794	4.21114e-05
AT1G30280	0.0343917	0.00254935						AT1G16530	0.0234957	0.00839876						AT3G23340	0.00415466	4.22075e-05
AT5G54470	-0.0360336	0.00257197						AT2G20020	0.0193455	0.00840469						AT4G06744	0.00255111	4.2476e-05
AT4G31810	-0.0148529	0.00257398						AT2G31020	-0.0182835	0.00845808						AT2G04410	0.00550115	4.28619e-05
AT5G20270	0.0162019	0.00257962						AT4G29230	-0.0211419	0.00847006						AT1G05320	-0.00392109	4.29123e-05
AT2G32800	0.0180247	0.00259192						AT4G33220	0.0198918	0.00860382						AT5G56270	0.00448777	4.32529e-05
AT5G03170	0.0175721	0.00259192						AT2G34600	-0.0734779	0.00862039						AT3G54960	-0.00356578	4.34242e-05
AT4G35750	0.0149419	0.00259218						AT2G40390	-0.0257416	0.00862921						AT5G66490	0.00882301	4.35025e-05
AT1G60750	0.0359615	0.00259599						AT2G38530	0.034245	0.00863621						AT1G27460	-0.00463941	4.37073e-05
AT5G39480	-0.0634477	0.00260873						AT5G18040	0.021257	0.00863834						AT5G05870	0.00481234	4.37877e-05
AT2G28450	-0.0159989	0.00262758						AT1G22550	-0.0301459	0.00865971						AT4G04750	0.00633937	4.38066e-05
AT1G20900	-0.0182884	0.00263528						AT5G17330	-0.0155874	0.00865971						AT1G49600	-0.00266652	4.40318e-05
AT5G15550	-0.012334	0.00266504						AT1G80040	0.0146531	0.00868324						AT1G73330	-0.00705875	4.41171e-05
AT3G20590	-0.0184121	0.00268354						AT5G36130	-0.0241296	0.00870159						AT3G52610	0.00506668	4.42504e-05
AT1G74380	0.00935084	0.00268743						AT5G61310	0.0243601	0.00870682						AT1G71710	0.0044221	4.44594e-05
AT5G04830	0.0126702	0.00269861						AT2G28600	0.013621	0.00877187						AT1G15540	-0.0209545	4.44913e-05
AT5G54145	0.0171361	0.00270727						AT1G14480	-0.0277913	0.00877844						AT5G04970	0.00475654	4.44913e-05
AT1G25240	0.0393464	0.00273171						AT1G21350	0.025201	0.00877844						AT1G56660	0.00727243	4.4784e-05
AT1G23720	-0.0247629	0.00274008						AT5G56240	-0.0164578	0.00878442						AT3G51150	0.00533527	4.4799e-05
AT2G37780	-0.0588935	0.00274445						AT5G58300	-0.0125594	0.00878442						AT2G07690	-0.00530773	4.4958e-05
AT5G62260	-0.0101182	0.00274524						AT5G55790	0.0188378	0.00878921						AT2G05310	0.00892452	4.53139e-05
AT2G47140	-0.0196438	0.00276106						AT1G20440	-0.0211552	0.00885374						AT5G32450	-0.00370661	4.53139e-05
AT5G05960	0.0152592	0.0027694						AT1G64670	0.0373392	0.00885374						AT3G23890	-0.00612405	4.5496e-05
AT1G14220	0.019362	0.00277902						AT3G13940	0.0124639	0.00885374						AT5G02370	-0.00533258	4.56057e-05
AT1G12810	-0.0245202	0.00278016						AT4G36850	-0.0518839	0.00885374						AT4G34620	0.00625412	4.62676e-05
AT3G06390	0.0222879	0.00279001						AT5G35200	-0.0115481	0.0088625						AT2G42430	0.00749147	4.63067e-05
AT1G44770	0.010188	0.00279995						AT1G12550	0.028817	0.00886975						AT3G44550	-0.00440939	4.63067e-05
AT3G27820	0.00950716	0.00280156						AT2G20550	-0.0274415	0.00886975						AT1G04030	-0.00658798	4.63426e-05
AT5G11210	0.0265385	0.00280156						AT3G61060	-0.0377532	0.00888469						AT5G24120	0.00550403	4.6386e-05
AT1G21360	0.0206109	0.00280685						AT5G15120	0.0262788	0.00891522						AT1G51140	0.00381458	4.65524e-05
AT3G11430	0.0220018	0.00280825						AT4G36000	-0.0484341	0.00892642						AT5G52880	0.00484583	4.65592e-05
AT4G31470	-0.0243203	0.00281045						AT4G38710	0.0138489	0.00892642						AT3G26085	0.0050226	4.67753e-05
AT2G41870	0.0192212	0.00281305						AT3G15450	-0.0955039	0.00893474						AT1G16860	-0.00297178	4.69977e-05
AT3G05685	-0.0380068	0.0028213						AT3G59765	0.0301784	0.00893474						AT1G04250	-0.00432375	4.74877e-05
AT2G32240	-0.0174207	0.00282596						AT3G27570	0.0138069	0.00895138						AT1G79970	0.0034367	4.75256e-05
AT1G29400	0.0104141	0.00283153						AT4G13890	-0.0406325	0.00895138						AT5G03570	0.00585516	4.76633e-05
AT3G59340	0.0219479	0.00283187						AT4G23420	-0.0240626	0.0089914						AT2G23770	-0.00431313	4.76742e-05
AT1G33970	0.0153613	0.00286429						AT1G07360	0.0135766	0.00902793						AT4G00070	0.00638488	4.7958e-05
AT2G43470	0.0414193	0.00286892						AT4G28260	-0.0166642	0.00902793						AT4G15230	-0.00528046	4.79686e-05
AT1G30730	0.0143838	0.00288696						AT1G18200	-0.0322407	0.00904856						AT4G16630	-0.00359237	4.79686e-05
AT3G27350	0.0166654	0.00289069						AT4G22530	0.02239	0.00904856						AT1G34355	-0.00540747	4.86418e-05
AT4G31650	0.0225869	0.00289426						AT5G06570	-0.0425339	0.00904856						AT2G18280	0.00590428	4.87313e-05
AT1G33790	-0.0240112	0.00290578						AT5G20540	0.0173636	0.00911492						AT2G22125	-0.00443817	4.87496e-05
AT5G35690	0.0116932	0.0029214						AT2G26670	-0.0210664	0.0091672						AT1G09340	0.00486285	4.87749e-05
AT3G03690	0.0145466	0.00292713						AT1G13250	-0.0234257	0.0092078						AT2G45750	-0.00443267	4.87957e-05
AT3G48510	0.0340747	0.00293119						AT5G39890	0.0467501	0.0092078						AT3G50130	-0.00856899	4.89156e-05
AT1G72416	-0.0286484	0.00293698						AT5G09960	0.0200657	0.0092123						AT5G24100	-0.00506014	4.89156e-05
AT1G67195	0.027126	0.00294669						AT1G05010	-0.0153651	0.00921374						AT3G47820	-0.00543881	4.94296e-05
AT2G45260	0.0101553	0.00295575						AT2G33540	-0.0197349	0.00923915						AT2G36410	-0.00391295	4.969e-05
AT4G01770	-0.0181163	0.00296559						AT3G16430	-0.0227423	0.00923915						AT4G16141	-0.00376906	4.98049e-05
AT3G48240	0.0279416	0.00296893						AT4G35740	0.0219889	0.00933118						AT5G21160	-0.00347704	4.98049e-05
AT4G10380	-0.018252	0.00297239						AT1G03740	-0.0121045	0.00936826						AT5G25770	0.00383189	4.98049e-05
AT4G29040	0.0078989	0.00299243						AT1G73620	0.0225702	0.00937929						AT5G20900	0.00276531	4.98762e-05
AT1G21120	0.0190845	0.00301094						AT4G23630	0.0133168	0.00937979						AT5G06300	-0.00416067	5.06799e-05
AT3G63210	0.0129599	0.00303297						AT5G42630	0.0222573	0.00937979						AT5G05320	0.00807752	5.14794e-05
AT5G10990	0.0242889	0.00303297						AT1G60190	-0.038403	0.00949747						AT4G29190	0.00426331	5.16953e-05
AT1G51860	-0.0192511	0.00305671						AT4G28210	0.0240184	0.0095523						AT3G16810	-0.00382973	5.18066e-05
AT2G26830	0.0152808	0.00306693						AT3G50930	-0.0318462	0.00967318						AT3G21510	0.00649385	5.2902e-05
AT4G13390	0.0211775	0.00306693						AT2G42640	0.0216673	0.0096917						AT4G20460	-0.00431925	5.30674e-05
AT5G17990	0.00989688	0.00308429						AT2G40610	0.0271587	0.00969563						AT5G17640	0.00391212	5.3134e-05
AT2G41540	0.012197	0.00308868						AT3G48360	-0.0273525	0.00975001						AT5G24270	0.00479369	5.3134e-05
AT4G38730	0.0201977	0.00311168						AT3G55950	-0.0212766	0.00981927						AT3G13410	0.00208078	5.32732e-05
AT2G04430	-0.0187281	0.003137						AT4G10730	-0.0161359	0.00981995						AT4G39260	-0.00286372	5.4201e-05
AT2G28890	-0.00918129	0.00313707						AT2G35736	0.0330937	0.00984319						AT2G03390	0.00382683	5.43158e-05
AT4G36900	0.0182923	0.00313721						AT5G60590	0.018812	0.00984319						AT5G57330	0.00347288	5.43158e-05
AT1G09070	0.0169557	0.00314378						AT5G13980	-0.0158189	0.00984722						AT5G66230	-0.00441042	5.43486e-05
AT1G17960	-0.0281514	0.00315631						AT2G18990	0.020394	0.00991605						AT4G11960	0.0041402	5.44815e-05
AT1G64740	-0.0215652	0.00317064						AT4G39235	0.0472341	0.00992162						AT2G38130	0.00436649	5.47308e-05
AT1G07795	0.0431569	0.0031766						AT2G15220	0.0218827	0.0099696						AT1G64405	0.00716825	5.49335e-05
AT3G26100	0.0101842	0.0031766						AT4G21210	0.0243661	0.0099696						AT1G70260	0.00873969	5.49335e-05
AT1G62980	0.0215228	0.00322713														AT5G18620	-0.00385774	5.49335e-05
AT1G23020	-0.0174286	0.00323369														AT5G19520	-0.00542256	5.49335e-05
AT5G28770	-0.0179137	0.00324438														AT3G09600	0.00395258	5.52172e-05
AT3G02200	-0.00783605	0.00324994														AT1G31650	0.0040276	5.52792e-05
AT3G12800	0.00961858	0.00326413														AT3G10405	0.00969147	5.52792e-05
AT4G14880	0.0108225	0.00326413														AT5G67100	-0.00718775	5.54029e-05
AT4G27950	-0.0164241	0.00326667														AT5G46720	0.0103568	5.57386e-05
AT5G15600	0.0186557	0.00329379														AT3G02140	-0.00899014	5.59464e-05
AT1G63120	0.0149567	0.00330339														AT3G14690	0.00535939	5.63093e-05
AT4G01540	-0.0200281	0.00330797														AT4G32290	-0.00695167	5.63195e-05
AT4G14060	0.0351733	0.00331502														AT3G53510	-0.00296313	5.63529e-05
AT3G07750	-0.0144571	0.00332321														AT4G34215	0.00292223	5.68578e-05
AT1G76040	0.0109212	0.00332688														AT3G13860	-0.00391589	5.71695e-05
AT3G23830	-0.0146044	0.0033294														AT5G06190	0.0112564	5.75291e-05
AT3G24360	0.0274391	0.0033294														AT1G46480	0.00480296	5.83106e-05
AT3G50790	-0.0163706	0.00333438														AT2G34690	0.00412681	5.87276e-05
AT3G58850	0.0252529	0.00333438														AT4G15290	-0.00785651	5.88305e-05
AT5G43350	-0.0149597	0.00333773														AT1G53680	-0.00622711	5.88606e-05
AT5G07475	0.0195399	0.00334453														AT5G05180	0.00448413	5.88606e-05
AT3G17860	-0.0191831	0.00335308														AT1G05380	-0.0036723	5.907e-05
AT3G23800	-0.0160896	0.0033771														AT5G02780	-0.00918395	5.92851e-05
AT4G22920	0.0191382	0.00339676														AT1G70620	-0.00290157	5.97965e-05
AT4G36830	0.0269252	0.00339962														AT4G29930	0.00487477	5.99175e-05
AT1G08900	0.0283898	0.00343599														AT4G10840	-0.00357861	6.03905e-05
AT1G25530	0.0214334	0.00343896														AT4G26880	0.012722	6.03905e-05
AT1G79150	-0.0115224	0.00343896														AT3G53810	0.0040702	6.09878e-05
AT4G30990	-0.0149749	0.00343896														AT1G80160	0.0114861	6.10338e-05
AT5G24410	-0.0211836	0.00344848														AT2G26250	-0.00370437	6.10496e-05
AT4G25350	-0.0196729	0.00346518														AT2G38710	0.00366921	6.17227e-05
AT4G26460	-0.0663301	0.00347327														AT5G14430	-0.00381496	6.17227e-05
AT2G47790	-0.0137707	0.00348891														AT2G46910	0.00521762	6.21179e-05
AT1G78990	0.0201939	0.00349758														AT3G06650	-0.00233486	6.22828e-05
AT4G17215	0.0157966	0.00349859														AT5G26600	-0.00288706	6.22828e-05
AT1G19200	0.0339384	0.0035101														AT5G39840	-0.00589149	6.31102e-05
AT4G00100	-0.00974441	0.00351222														AT4G33530	-0.00306415	6.3747e-05
AT5G46600	0.0179682	0.00351222														AT5G47140	0.00364976	6.3747e-05
AT3G46260	-0.0550486	0.00353502														AT3G05910	0.00206093	6.37819e-05
AT5G16490	0.0242928	0.00355567														AT3G50480	0.010006	6.37839e-05
AT5G48560	-0.0139579	0.00356235														AT2G06850	0.00265463	6.41266e-05
AT3G52140	-0.013169	0.00358512														AT3G10690	-0.00427848	6.51294e-05
AT2G07050	0.00669038	0.00359239														AT5G66480	0.00900699	6.54083e-05
AT3G19970	0.0165327	0.00360078														AT1G06490	-0.00416854	6.60062e-05
AT1G13280	0.00889477	0.00361421														AT4G25630	-0.00360698	6.60062e-05
AT5G10290	-0.0101673	0.00362209														AT3G61490	0.00472088	6.6099e-05
AT4G01600	0.0255972	0.00362608														AT5G24230	-0.00694114	6.62662e-05
AT1G14740	-0.00913008	0.00363132														AT2G37975	0.00599729	6.75517e-05
AT5G59260	-0.0409715	0.00363481														AT1G78430	-0.00748735	6.82374e-05
AT1G01120	0.0139262	0.00367424														AT3G44280	0.00426972	6.83198e-05
AT2G38370	-0.0167229	0.00370566														AT1G06720	-0.00372168	6.85644e-05
AT5G42510	0.0211347	0.00371117														AT1G55670	0.0116104	6.86694e-05
AT2G32510	0.0201584	0.00371823														AT1G20220	-0.00379882	6.89963e-05
AT5G43910	-0.015873	0.00371823														AT5G14370	0.00563771	6.90849e-05
AT5G05500	0.0172834	0.00373271														AT5G16530	-0.0120673	6.93625e-05
AT1G50420	-0.0119614	0.00373742														AT1G23970	-0.00458251	6.97913e-05
AT4G03460	-0.0245672	0.00377351														AT5G08390	-0.0048883	6.97913e-05
AT4G36210	0.00868441	0.00377351														AT1G28660	-0.0118877	7.02123e-05
AT3G05950	-0.0189794	0.00378307														AT4G19410	0.00419692	7.13198e-05
AT1G73540	0.018154	0.00378952														AT1G19220	-0.00414304	7.14239e-05
AT2G28315	0.0160469	0.00381313														AT4G33740	-0.00370633	7.15083e-05
AT1G64820	-0.0506586	0.00382227														AT2G05075	0.0116508	7.16424e-05
AT3G16390	0.0174851	0.00382687														AT4G25310	0.00722879	7.19685e-05
AT4G14720	-0.0141477	0.00383883														AT5G20420	0.00931489	7.28166e-05
AT1G10840	-0.00738885	0.0038401														AT3G22170	-0.00274671	7.30411e-05
AT2G47960	-0.00892867	0.00384044														AT3G59910	0.00252391	7.30712e-05
AT4G04960	0.0145644	0.00384719														AT2G39700	-0.00504287	7.35156e-05
AT1G13300	-0.0153712	0.00386086														AT2G38640	0.00542437	7.37703e-05
AT4G27350	0.0152456	0.00387398														AT3G62310	-0.00282264	7.39099e-05
AT5G06370	0.00993002	0.00387398														AT2G45510	0.00313584	7.43854e-05
AT1G61750	-0.0307591	0.00387742														AT3G56230	-0.00660162	7.50641e-05
AT1G75620	0.0257807	0.00387742														AT1G61380	0.00579938	7.54842e-05
AT4G36220	0.0192665	0.00387742														AT2G35770	-0.00587207	7.61679e-05
AT1G06473	0.0266472	0.00388991														AT1G76470	0.00790416	7.69248e-05
AT4G32480	-0.0343291	0.00392418														AT1G50590	0.00565357	7.69819e-05
AT5G60280	-0.0133997	0.00400366														AT3G13510	-0.00334216	7.69819e-05
AT5G20900	0.0120827	0.00401905														AT5G10240	-0.00387802	7.77884e-05
AT3G54820	0.0273952	0.0040195														AT5G39590	0.00322568	7.85538e-05
AT2G42690	0.0256251	0.00402435														AT3G17790	0.00568154	7.88782e-05
AT5G13750	0.0159272	0.0040332														AT1G77760	0.0064434	7.90154e-05
AT4G34135	0.0229776	0.00407221														AT2G28780	0.00480099	7.91397e-05
AT3G44300	0.0217477	0.00408879														AT3G03980	0.00525808	7.91397e-05
AT1G02816	0.0151664	0.00410553														AT3G55330	0.0103302	7.92619e-05
AT3G14870	-0.0200645	0.00410553														AT2G39180	-0.00847631	7.93412e-05
AT3G45740	-0.015555	0.00410553														AT4G32980	0.00881674	7.93412e-05
AT1G53430	-0.0180885	0.00417347														AT2G38510	-0.0195466	7.94782e-05
AT1G10400	-0.0211223	0.00421255														AT1G07040	0.00387225	7.98137e-05
AT5G22140	0.0188117	0.00422947														AT2G21960	0.00578189	7.99699e-05
AT5G27520	0.0120066	0.00424651														AT2G02100	0.00709661	8.08044e-05
AT3G26440	0.013558	0.00424907														AT4G26690	-0.00535771	8.0918e-05
AT4G39950	0.028479	0.00426623														AT3G11964	-0.00631703	8.23003e-05
AT2G29050	0.0109225	0.00427908														AT5G23850	0.00424116	8.2568e-05
AT1G21410	0.0201587	0.00428392														AT3G43520	0.00383394	8.33814e-05
AT3G02555	-0.0244279	0.00428392														AT2G43470	-0.0127767	8.36672e-05
AT3G44290	0.043548	0.00428392														AT5G08630	-0.00383228	8.37924e-05
AT3G13230	-0.0125766	0.00428826														AT3G03170	0.00779284	8.4405e-05
AT2G31230	-0.0209563	0.00431079														AT2G42590	0.00303588	8.45686e-05
AT4G13290	0.0240789	0.00433009														AT3G46540	0.00390539	8.46647e-05
AT2G37130	0.0160788	0.00433238														AT4G12270	0.00552805	8.4762e-05
AT3G56170	0.0134803	0.00433996														AT2G16005	-0.0129579	8.4991e-05
AT3G20130	0.0122456	0.0043446														AT3G25480	0.0073145	8.64553e-05
AT4G04460	0.0187597	0.00440187														AT2G46780	-0.00455199	8.6613e-05
AT5G23040	-0.0104841	0.00442212														AT3G27700	-0.00332722	8.67792e-05
AT2G44230	0.0162959	0.00447196														AT2G25940	0.00513902	8.70709e-05
AT3G03530	0.0197379	0.0044769														AT1G33490	0.0044856	8.70824e-05
AT4G16850	-0.0144639	0.0044769														AT1G12520	0.00749063	8.78638e-05
AT3G29034	-0.0176426	0.00447867														AT3G46490	-0.0132424	8.91394e-05
AT3G49860	-0.0137012	0.00448049														AT3G58730	0.00261741	8.96219e-05
AT5G13100	-0.00979748	0.00449163														AT3G10815	0.00575505	8.98943e-05
AT5G16410	0.044098	0.00449346														AT1G25425	0.0102692	9.06766e-05
AT2G18890	0.0181193	0.00450981														AT1G52660	-0.0087771	9.06907e-05
AT5G23050	0.0133312	0.00451353														AT4G31000	0.00379076	9.13048e-05
AT1G64190	-0.0155165	0.0045417														AT2G38310	-0.00663119	9.16858e-05
AT1G20260	0.0100065	0.00454539														AT5G14520	-0.00380002	9.22361e-05
AT1G52890	0.039947	0.00455699														AT1G78140	0.00408084	9.30274e-05
AT2G16380	-0.0262231	0.00456077														AT5G45670	-0.00835679	9.39917e-05
AT1G55680	0.00719999	0.00458029														AT5G43260	0.00549456	9.42205e-05
AT2G22670	0.0101215	0.00463094														AT3G22240	-0.00548456	9.44864e-05
AT4G21840	0.0243008	0.00463094														AT3G02240	0.00718345	9.4842e-05
AT2G19810	0.0290724	0.00466113														AT1G11800	-0.00782353	9.55301e-05
AT2G45820	0.0122568	0.00468278														AT3G19790	0.00508105	9.59776e-05
AT5G04200	0.0155384	0.00468278														AT4G30160	-0.00421689	9.60651e-05
AT5G06490	-0.0390782	0.00468278														AT2G43000	-0.00911155	9.65429e-05
AT4G23020	0.0320298	0.00469029														AT3G13750	-0.00369513	9.67809e-05
AT5G15580	-0.0157884	0.00469288														AT5G63940	-0.00396955	9.73768e-05
AT1G01540	-0.00867756	0.00469587														AT3G51430	0.00358951	9.78518e-05
AT1G78830	0.0194483	0.00469695														AT2G39580	-0.00367156	9.86933e-05
AT4G18780	0.015735	0.00471062														AT1G17490	0.00652624	9.94011e-05
AT1G54130	0.0108629	0.00471235														AT5G15270	-0.00331229	9.99197e-05
AT3G19960	0.00902454	0.00471816														AT2G44110	-0.00658994	0.000101273
AT3G04640	0.0219284	0.00472006														AT4G36920	-0.0046293	0.000101366
AT5G26090	-0.0517756	0.00477403														AT2G42810	-0.00308107	0.000103478
AT4G39400	-0.0141455	0.00477729														AT4G11820	-0.00408662	0.000104925
AT2G34170	-0.019675	0.00478107														AT5G47740	0.00688753	0.000104974
AT2G31585	-0.0210638	0.00478331														AT2G45660	-0.00555092	0.000105902
AT1G61890	0.0107754	0.00481758														AT3G19520	0.0040029	0.000105902
AT1G08670	0.0179553	0.00485989														AT4G31470	0.00635476	0.000106315
AT4G11280	0.0139309	0.00485989														AT2G46650	-0.00589818	0.000106554
AT5G20670	0.0382279	0.00485989														AT1G30870	-0.00514948	0.000107074
AT5G54300	0.0335633	0.00490112														AT4G24790	-0.00378585	0.000107129
AT2G34357	-0.0112037	0.00490436														AT2G30140	0.00412056	0.000107253
AT2G02630	-0.026973	0.00493902														AT1G25275	0.00782686	0.000107446
AT1G27770	0.00945769	0.00495161														AT2G28890	0.00278694	0.000107446
AT1G14730	0.0195165	0.00499427														AT5G01750	0.00421169	0.000107771
AT3G48670	-0.0132507	0.00499427														AT2G36330	0.00481459	0.000107798
AT4G13000	0.0407151	0.00499427														AT4G22745	0.00532451	0.000107798
AT2G45000	-0.0149879	0.00503997														AT1G26410	-0.0187901	0.000108148
AT4G19530	-0.0445898	0.00504903														AT5G62880	0.00346038	0.000109086
AT1G60810	0.0120088	0.00505306														AT5G06980	0.00508144	0.000109947
AT2G33385	0.025635	0.00505413														AT5G49120	0.00957089	0.000110849
AT4G37710	-0.0622995	0.00505525														AT5G20540	0.00355554	0.00011092
AT4G36640	0.0169216	0.00508431														AT5G61760	0.00369298	0.000111014
AT1G76210	0.0248268	0.00508701														AT4G02270	-0.0103946	0.000112273
AT5G07250	0.0122354	0.00509604														AT4G23070	-0.0181679	0.000113164
AT1G73680	0.0179167	0.00510463														AT1G48800	-0.0134247	0.000113939
AT1G77145	-0.0293046	0.00510463														AT1G02640	-0.00623868	0.000114072
AT1G79130	0.0249392	0.00510463														AT3G55370	-0.00456186	0.000114547
AT4G23400	0.0153564	0.00510463														AT5G57050	0.0045557	0.000116135
AT5G02360	-0.0217172	0.00510463														AT2G34840	0.00416092	0.000116168
AT5G14050	-0.00952226	0.00510746														AT3G21260	0.0042538	0.00011623
AT1G01448	-0.0223642	0.00512673														AT5G66960	-0.00621785	0.000116556
AT5G04330	0.022122	0.00515029														AT1G08110	0.00385455	0.000117168
AT1G77330	-0.0113906	0.00517563														AT1G59780	-0.00609197	0.000117512
AT3G42640	-0.0144389	0.00517563														AT2G35150	-0.00575253	0.000118678
AT4G01840	0.0192052	0.00520522														AT1G72030	0.0116889	0.000119602
AT2G35940	0.0158615	0.0052239														AT1G33520	-0.00317336	0.000119639
AT1G22710	0.0208352	0.00523047														AT1G21740	-0.00409068	0.000120604
AT1G54540	0.0195919	0.00524991														AT5G66870	0.00302152	0.000120604
AT3G50910	0.00992317	0.00525842														AT3G03910	-0.0150987	0.000122097
AT3G19320	-0.030047	0.00526326														AT5G16480	-0.00612544	0.000122097
AT1G48870	0.0431883	0.00527347														AT1G04200	-0.00302625	0.000122173
AT3G22600	0.0129993	0.00527347														AT2G46930	0.00365865	0.000122776
AT3G25610	0.0127456	0.00527581														AT5G35190	-0.00862098	0.000122776
AT3G07050	-0.0115157	0.00528485														AT1G06570	0.00463996	0.000123638
AT5G65207	-0.0225641	0.00529325														AT2G40940	0.00300918	0.000123812
AT5G17390	0.0215145	0.00530182														AT3G02065	-0.00348392	0.000123883
AT3G22880	0.0191482	0.00531248														AT5G01490	-0.00811483	0.000124482
AT4G01100	-0.00851117	0.00533266														AT5G46600	0.00489708	0.000126619
AT4G24040	-0.022395	0.00533266														AT2G32610	-0.00942692	0.000126753
AT1G32970	0.0278491	0.00539185														AT4G15510	0.00526868	0.000126753
AT3G07880	0.0102647	0.00543658														AT3G29630	-0.00522416	0.000127245
AT4G36230	0.0413395	0.00544751														AT1G16630	-0.00603684	0.000127488
AT5G24870	0.013943	0.00548443														AT4G22120	-0.00510013	0.000127754
AT3G26830	0.0160775	0.00549217														AT3G12200	-0.00337585	0.000127905
AT3G59050	0.0113212	0.00549217														AT5G07630	-0.00434099	0.000128167
AT4G37790	0.0167914	0.00549217														AT2G02580	0.0123057	0.000128351
AT2G20960	-0.016319	0.00551364														AT5G41315	-0.00859066	0.000128351
AT5G11440	0.0318289	0.00553308														AT5G52920	-0.00378066	0.000128364
AT5G23380	-0.0147085	0.00553308														AT5G42540	-0.0029209	0.000128408
AT3G08580	-0.00580464	0.00553835														AT5G47770	-0.00237542	0.000129014
AT1G07620	-0.0272357	0.00561291														AT2G45990	0.00299472	0.000131419
AT2G40900	0.013284	0.0056376														AT3G14650	0.00417431	0.000131609
AT4G02360	0.0219427	0.0056459														AT3G11270	0.00343987	0.000132738
AT5G43150	0.0146229	0.00564743														AT3G07050	-0.00387933	0.000132852
AT3G62780	-0.0241942	0.00565776														AT5G10170	-0.0047961	0.000133034
AT1G55290	0.0223852	0.00568744														AT5G66985	-0.00395953	0.00013375
AT3G62280	-0.0140017	0.00570524														AT5G53480	-0.00359439	0.000133927
AT1G74180	-0.0240347	0.00573527														AT1G71180	0.00600209	0.000134841
AT3G53590	-0.0294692	0.00574668														AT1G30690	-0.00428139	0.000135394
AT5G51760	-0.0543193	0.00577938														AT4G27730	0.00676699	0.000135509
AT2G34355	0.0181451	0.00579366														AT1G47530	0.00364546	0.000136096
AT1G18910	-0.0153786	0.00580388														AT1G53345	-0.0060196	0.000136139
AT5G14330	-0.0189597	0.00582325														AT4G12070	0.0034752	0.000136856
AT3G54920	-0.013716	0.00584964														AT4G32760	-0.00246882	0.000137167
AT3G13222	-0.0130773	0.00586118														AT2G37440	-0.00401858	0.000138025
AT4G30290	0.0170244	0.00589646														AT4G38932	0.00742646	0.000138025
AT5G07340	0.0116378	0.00596223														AT1G10600	0.00438221	0.000139284
AT1G68740	0.0183773	0.00596736														AT3G45330	-0.0111333	0.000140096
AT5G02480	0.00750238	0.00597789														AT2G01110	0.00468368	0.000140268
AT5G10520	-0.0147721	0.00608036														AT1G59900	0.00283418	0.000140944
AT1G68530	0.022482	0.00614857														AT4G19720	-0.00593802	0.000140944
AT4G22780	-0.0176946	0.00621541														AT5G60460	0.00770767	0.000140944
AT5G28290	-0.0124478	0.00621541														AT1G06230	-0.00310868	0.000141607
AT4G12410	0.0483229	0.006219														AT5G22740	-0.00404498	0.00014163
AT3G10930	0.0251561	0.00623023														AT5G64900	0.00608541	0.000142309
AT1G74100	0.0104187	0.00625202														AT5G49520	0.0066807	0.000142332
AT5G66800	0.0388522	0.00626637														AT2G16400	0.00338866	0.000142536
AT4G38900	0.0118011	0.0062758														AT5G61190	-0.00372099	0.000143387
AT1G58180	0.0169987	0.00629345														AT3G63540	0.00683964	0.000144532
AT4G30380	-0.0612523	0.0062945														AT1G73620	0.00300017	0.000144886
AT5G52820	-0.0120743	0.0063062														AT2G32560	-0.00503118	0.00014659
AT3G57157	-0.0146909	0.00632335														AT3G49750	-0.00370341	0.000146605
AT2G40260	0.0133121	0.00640839														AT5G65800	-0.0088806	0.000146605
AT1G03850	0.0177996	0.00646632														AT5G40000	0.012616	0.000148115
AT1G16370	0.019792	0.00651111														AT4G13750	-0.00534177	0.000148802
AT3G01120	-0.0124785	0.0065149														AT4G26900	-0.00321895	0.000148822
AT3G62150	-0.0191185	0.00653762														AT2G47240	-0.00652693	0.000149181
AT5G37840	0.0434601	0.00653762														AT3G02130	-0.00293989	0.000149228
AT3G03360	-0.0122438	0.00654672														AT4G35290	-0.00536086	0.000150568
AT4G25010	0.0289735	0.00667444														AT2G37050	-0.00335752	0.000151683
AT4G33980	-0.025526	0.00667444														AT1G62262	0.00904904	0.00015212
AT5G49270	0.0200209	0.00668849														AT3G25820	-0.00976562	0.00015212
AT4G27810	-0.0517673	0.00671131														AT1G08180	0.00974801	0.00015252
AT2G44065	-0.00860392	0.00674869														AT2G34720	0.00426081	0.000153712
AT2G35990	0.03934	0.00679017														AT5G09300	-0.00366624	0.000153712
AT1G06640	0.0118884	0.00680671														AT1G53625	-0.0089914	0.000153721
AT1G31812	0.0115756	0.00685273														AT4G36150	-0.00467447	0.000153738
AT1G04960	0.0111632	0.00687604														AT2G01008	0.0138202	0.000154263
AT5G03740	-0.00858013	0.00690072														AT4G09760	0.00485117	0.000154559
AT2G06530	0.00840561	0.00696727														AT4G25240	-0.00364779	0.000156335
AT4G10280	0.023865	0.00696727														AT4G33330	-0.00467678	0.000156498
AT4G12090	-0.0207843	0.00702669														AT5G04770	-0.00500132	0.000156604
AT1G49500	0.0173705	0.0070623														AT3G14230	0.00369118	0.000156694
AT5G20550	0.0144275	0.00706675														AT1G74830	-0.0130679	0.000157101
AT1G75380	0.0172376	0.00716121														AT4G14070	0.00296587	0.00015772
AT1G02930	0.0145879	0.00717309														AT2G47000	-0.00676948	0.00015774
AT1G56423	0.0140946	0.00720435														AT4G09110	-0.00850747	0.00015774
AT5G22560	-0.0366861	0.00720435														AT2G05520	0.00986121	0.000158014
AT5G17420	0.0134027	0.00721948														AT3G56630	0.00597423	0.000158321
AT1G77740	0.0114942	0.00728826														AT3G57090	0.00317002	0.000158478
AT5G62920	0.0187309	0.0073167														AT1G18550	-0.00708484	0.000158937
AT2G29460	0.0288614	0.00742416														AT1G48870	-0.00836298	0.000158937
AT4G34180	0.0104084	0.00742786														AT1G72500	-0.00357976	0.000158937
AT1G57560	0.0204395	0.00748851														AT1G77660	-0.00595458	0.000158937
AT2G45890	0.0160835	0.00750535														AT3G59340	-0.00983377	0.000159626
AT5G63905	0.0163338	0.00751303														AT1G09170	-0.00680581	0.000160379
AT1G74458	0.0212874	0.00754867														AT2G18230	0.00325656	0.000161423
AT1G24793	0.0583808	0.00755259														AT5G47560	0.00524405	0.000161423
AT1G53270	0.0203755	0.00763131														AT3G10320	-0.00630334	0.000161623
AT2G37540	0.0175739	0.00764362														AT1G19910	0.00445082	0.000162742
AT5G50800	0.0240263	0.00764563														AT3G16800	0.00313978	0.000163296
AT2G46510	0.0174563	0.00765801														AT3G58660	-0.00294908	0.000164561
AT4G17280	0.0157365	0.00774489														AT5G44635	-0.00503155	0.000164951
AT1G15960	0.047534	0.0077811														AT4G21390	-0.00595657	0.000165038
AT5G40990	0.0434735	0.0077941														AT5G06150	-0.00431069	0.000165735
AT5G60680	0.01672	0.00781907														AT5G61450	0.00273455	0.000165841
AT1G11860	0.00814342	0.00783115														AT4G38660	-0.00484776	0.000167413
AT1G51440	0.0237809	0.00783115														AT3G57940	-0.00562179	0.000167425
AT4G16141	-0.0121631	0.00783115														AT3G28100	0.00639094	0.000167737
AT5G12140	0.0109802	0.00783115														AT2G36670	-0.00354239	0.000167799
AT3G30350	-0.024004	0.00787105														AT1G75170	0.003702	0.000168147
AT3G56990	-0.0107607	0.00791232														AT2G04450	-0.0088334	0.000168478
AT4G20760	0.0224674	0.00793564														AT1G62380	-0.00422329	0.000170267
AT1G55920	0.0124102	0.00794807														AT2G33205	-0.00511369	0.000170407
AT3G55090	0.0266883	0.00794807														AT1G09080	-0.030762	0.000170825
AT4G38060	0.0173589	0.00796866														AT1G06670	-0.00318902	0.000171358
AT5G14430	-0.00779405	0.00796866														AT4G01740	-0.00421791	0.000171358
AT5G20950	-0.0108979	0.00796866														AT4G14630	-0.0118498	0.000171358
AT5G03080	0.0138509	0.0080018														AT5G18040	0.00472725	0.000172332
AT1G30820	0.010859	0.00803927														AT3G51360	-0.00674119	0.000172368
AT2G28080	-0.0104912	0.00803927														AT4G17570	0.00332963	0.000172939
AT5G36870	-0.0313035	0.00804786														AT4G27520	0.00575459	0.000173589
AT2G25510	-0.0316309	0.00806738														AT1G04980	-0.00333771	0.000173736
AT1G01780	0.011598	0.00807781														AT1G28100	-0.00758009	0.000175041
AT1G15490	-0.0146254	0.00807781														AT1G25460	0.0101502	0.000175368
AT1G10090	0.0129791	0.00809797														AT2G31040	0.00368641	0.000175368
AT1G03610	-0.0205941	0.00811063														AT3G25900	0.00441498	0.000175857
AT5G49800	0.016883	0.00813832														AT1G05830	-0.00366113	0.000176125
AT5G40700	0.0191805	0.00819294														AT5G56660	0.00259353	0.000176947
AT1G05360	0.0146521	0.0081981														AT1G49750	-0.0078051	0.000177136
AT1G62990	0.0118478	0.0081981														AT1G52200	-0.00485195	0.000177136
AT1G19700	0.0102193	0.00833091														AT4G12300	0.00419882	0.000177136
AT3G02430	-0.0402077	0.00833277														AT5G60360	0.00352151	0.00017729
AT5G58900	-0.0174246	0.00834972														AT1G64230	0.00512966	0.000178222
AT3G00880	0.0338696	0.008379														AT2G34610	0.00713635	0.000178286
AT5G41120	0.0166151	0.00838635														AT3G61750	-0.00385859	0.000178311
AT2G28410	0.016425	0.00839324														AT5G43270	-0.00328491	0.000178472
AT1G53130	-0.0245026	0.00846043														AT4G36380	0.00307749	0.000178977
AT1G53470	0.0145416	0.00850052														AT2G30600	-0.00481549	0.000179062
AT2G42590	0.0108636	0.00853327														AT4G32320	0.00563463	0.000179108
AT4G35480	0.0408441	0.00853327														AT5G49850	0.00568763	0.000181836
AT2G15880	-0.0452669	0.00855506														AT4G23800	-0.00469653	0.000182071
AT3G49290	-0.0203891	0.00855506														AT3G07970	0.00353852	0.000182611
AT5G28020	0.0111021	0.00855709														AT2G42530	0.0158044	0.000183533
AT3G45840	-0.0205963	0.0085798														AT4G14060	0.00643074	0.000184585
AT1G67730	0.00875924	0.00863441														AT4G22860	-0.00557493	0.000185911
AT1G61640	-0.0145177	0.00868505														AT4G04800	0.00368352	0.000186087
AT4G37340	-0.0156821	0.00870301														AT1G03530	-0.00370228	0.000186198
AT4G24130	0.013604	0.00872543														AT1G25520	0.00347231	0.000186405
AT1G30420	-0.0152319	0.00873552														AT3G63520	0.00248082	0.000186405
AT1G68850	0.0156149	0.0087379														AT3G43610	-0.00341696	0.000187605
AT2G01880	0.0152092	0.00875864														AT2G26870	0.0109757	0.000189326
AT2G36080	0.023492	0.0087758														AT2G34020	-0.00542448	0.000189374
AT1G34050	-0.0210609	0.0087937														AT5G52020	-0.00570925	0.000189459
AT3G06990	-0.0193447	0.0087937														AT5G20045	0.00796946	0.00019087
AT5G49350	0.0221513	0.00879784														AT1G61580	-0.00450933	0.000191305
AT5G65040	0.0203586	0.00882045														AT4G15360	0.0154125	0.000191366
AT2G26355	0.0172392	0.00884602														AT5G03560	0.0045789	0.000192997
AT4G06746	-0.0440226	0.00884602														AT5G04150	-0.0162808	0.00019348
AT5G46890	0.0181086	0.00885374														AT5G17910	-0.00383629	0.000193726
AT3G10260	0.0134017	0.00886847														AT1G76410	0.0125419	0.000193736
AT4G33810	0.0234279	0.00887134														AT3G56170	0.00311529	0.000194775
AT1G09660	-0.0120229	0.00895178														AT4G36610	-0.00430134	0.000194775
AT1G18470	0.00737795	0.00895178														AT2G05920	-0.00269595	0.000195308
AT1G27290	0.0119022	0.00895178														AT2G23540	-0.00364813	0.000195446
AT5G10930	0.0151688	0.00895178														AT2G31660	-0.0041174	0.000196285
AT4G15390	-0.0156551	0.00897264														AT3G55990	-0.00459281	0.000196285
AT1G63570	-0.0375929	0.00898312														AT3G03680	-0.0066658	0.000196619
AT4G29130	0.00764836	0.00905401														AT2G23790	-0.00309203	0.000197389
AT2G22920	0.0156782	0.00912553														AT1G59590	-0.00470578	0.000198035
AT4G30470	0.0151712	0.00912769														AT3G28130	0.00487351	0.000198071
AT3G21770	0.00800301	0.00915971														AT5G57070	-0.00282967	0.000198842
AT1G65985	-0.012356	0.00917868														AT2G38620	-0.00586388	0.000200706
AT3G17410	-0.0135383	0.00924399														AT5G41790	-0.00377016	0.00020339
AT1G08200	0.00587329	0.00926175														AT3G01410	-0.00567538	0.000205804
AT1G23510	-0.0458755	0.00929544														AT1G14370	0.00400297	0.000205965
AT5G41730	0.0309809	0.00932253														AT5G40890	-0.00234216	0.000207034
AT1G22400	0.0183536	0.00936056														AT1G64530	-0.00258451	0.000207298
AT1G72350	-0.0520361	0.00945354														AT2G40100	0.00937738	0.000207548
AT4G17030	0.0187494	0.00952189														AT1G31070	-0.00304691	0.000207569
AT4G35380	-0.0159428	0.00952189														AT3G04570	0.00262292	0.000207569
AT2G48130	0.0179703	0.00956666														AT5G65670	0.00199098	0.000207569
AT4G14550	-0.0152837	0.00956666														AT4G24930	0.00924377	0.000207674
AT1G02335	0.0206308	0.00956736														AT5G58070	0.00593616	0.000209952
AT2G38110	0.0248032	0.00961321														AT4G33780	0.0029327	0.000210918
AT5G44005	0.0349159	0.009621														AT3G55160	-0.00518236	0.00021119
AT1G22065	0.0143506	0.00963823														AT4G36690	-0.00322018	0.000211783
AT3G29360	0.00947792	0.00976747														AT4G26700	0.00391151	0.00021248
AT3G26220	0.0386591	0.00977276														AT2G21820	0.0144914	0.000213879
AT3G27740	-0.00893673	0.00977673														AT1G14810	-0.00279897	0.000214442
AT5G22860	0.0328712	0.00977673														AT3G21720	0.0127669	0.000214801
AT3G45030	-0.00834123	0.00985157														AT4G20070	-0.00383606	0.000215345
																AT5G42980	0.00319998	0.000215345
																AT2G32550	0.012948	0.000216355
																AT5G40950	0.00317715	0.000216707
																AT3G24550	-0.00242289	0.000218219
																AT5G26010	0.00367959	0.000218859
																AT5G47370	-0.00432735	0.000219253
																AT1G72020	0.00390613	0.000219815
																AT5G65260	0.00390338	0.000220082
																AT1G80450	0.00870386	0.000221189
																AT5G01050	-0.00602716	0.000221539
																AT2G36690	0.00850764	0.000221976
																AT1G15440	-0.00256363	0.000222324
																AT1G15180	0.0102968	0.000223939
																AT4G23510	0.005398	0.000223939
																AT5G16280	-0.00300488	0.000224073
																AT5G43940	0.00242045	0.00022523
																AT1G74920	0.00279506	0.000225589
																AT1G76800	0.00723715	0.000226762
																AT2G33250	0.00604845	0.000226839
																AT1G76850	-0.00283238	0.000228062
																AT3G13070	-0.00295078	0.000228062
																AT3G07040	0.0107483	0.000228644
																AT1G16720	0.00472953	0.000228817
																AT5G05340	0.0285631	0.000229962
																AT5G64350	0.00579072	0.000233629
																AT3G54580	-0.00637656	0.00023451
																AT3G14420	0.0124721	0.000235546
																AT1G62020	-0.00317538	0.000235856
																AT1G76560	0.00536202	0.000235901
																AT1G06410	-0.00462513	0.000237542
																AT1G79890	-0.00910685	0.000237542
																AT3G61200	0.00488301	0.000237746
																AT1G13600	0.00591305	0.000239144
																AT1G13930	0.00465402	0.000239609
																AT1G77550	-0.00415772	0.000239619
																AT1G02475	0.00497594	0.000241256
																AT2G38320	-0.00702167	0.000242126
																AT5G04980	-0.00439194	0.000242269
																AT1G29470	-0.0037044	0.000242324
																AT3G11700	-0.0043	0.000242325
[truncated: 2,237 more rows]

## Sheet: Shoot - Dose Responsive Genes
Vermiculite drying - 1792 genes				Hard Agar - 1921 genes				PEG - 366 genes				Mannitol - 2834 genes				NaCl - 2265 genes
Gene	log2FoldChange	padj		Gene	log2FoldChange	padj		Gene	log2FoldChange	padj		Gene	log2FoldChange	padj		Gene	log2FoldChange	padj
AT2G46680	0.0483055	6.03538e-27		AT3G08860	0.0433377	1.91371e-46		AT2G05380	0.0763701	4.39871e-28		AT2G18050	0.0186013	1.92155e-85		AT2G21590	0.0168765	1.36799e-54
AT3G23000	0.0170819	2.95058e-22		AT2G18050	0.0531171	3.93874e-43		AT2G18050	0.082348	1.73915e-20		AT4G10380	0.0218658	8.12913e-71		AT3G54830	-0.0320015	1.6198e-54
AT1G70830	0.0252644	8.95479e-21		AT1G13260	-0.051436	4.25562e-41		AT4G14400	-0.0693875	3.07644e-15		AT4G17470	0.0205595	3.0879e-59		AT1G61800	0.0315657	9.86818e-52
AT3G61890	0.0359444	5.33018e-20		AT1G54100	0.0339305	5.17117e-41		AT5G61820	0.0625234	5.8222e-15		AT5G03190	0.0165893	2.18633e-53		AT5G59310	0.0362999	1.4098e-50
AT1G35720	0.0264782	2.62195e-19		AT2G46270	0.0467106	3.42507e-37		AT5G16980	0.0693058	2.4079e-14		AT1G76960	0.0196441	9.07396e-37		AT4G34710	0.0134905	4.60266e-48
AT5G25610	0.0270804	1.38112e-18		AT2G21590	0.0389499	9.04458e-37		AT2G46600	0.0600503	6.82918e-13		AT2G25625	0.0128367	1.2492e-34		AT2G18050	0.0213205	7.5733e-44
AT5G59320	0.113292	7.46863e-18		AT5G19470	0.0669319	1.00469e-35		AT4G02825	-0.0660185	3.75847e-12		AT5G15500	0.0184778	8.87309e-34		AT4G04840	-0.0226569	2.45045e-43
AT4G33550	0.0615095	9.71423e-18		AT2G34510	-0.0228316	1.83233e-31		AT1G64660	0.0721495	5.46471e-10		AT4G12980	-0.006993	3.52505e-33		AT4G32340	-0.0182305	1.84664e-39
AT5G47640	0.0294875	4.23694e-17		AT5G15500	0.0670803	4.64709e-31		AT2G45180	-0.0639477	5.46471e-10		AT4G02850	-0.0121252	1.25862e-32		AT3G46490	-0.0185369	5.08687e-36
AT5G66400	0.0412017	9.51994e-17		AT2G45180	-0.03649	5.93535e-31		AT3G28270	0.0611149	5.6535e-10		AT4G04840	-0.0241752	1.09492e-29		AT2G18300	-0.0129014	9.83142e-36
AT1G21400	0.0316751	1.47866e-16		AT5G48850	0.0615315	6.65622e-31		AT2G46680	0.0685151	8.45287e-10		AT4G27410	0.0165328	1.47075e-29		AT4G15910	0.017912	4.65607e-33
AT2G46270	0.0541322	2.26682e-16		AT3G05400	0.0391924	7.87973e-31		AT3G04210	-0.0868057	1.11427e-09		AT1G72770	0.00949917	2.81296e-29		AT5G06760	0.0321157	1.64462e-32
AT1G56280	0.0182496	2.38178e-16		AT2G33380	0.0600185	9.82765e-31		AT4G22880	0.0791463	1.21516e-09		AT5G06760	0.0310236	4.92009e-29		AT2G30520	-0.00959485	1.02088e-31
AT1G15690	-0.0110538	2.41542e-16		AT4G02280	0.0413958	1.3471e-30		AT5G38990	-0.0312275	3.39305e-09		AT4G28780	-0.0128423	2.1448e-28		AT1G02850	0.0428326	4.40466e-31
AT2G39800	0.022539	2.41542e-16		AT1G62540	0.038921	1.47261e-30		AT4G37180	0.0395143	3.88878e-09		AT4G18280	0.0143156	5.45324e-27		AT2G37760	0.0178314	7.36297e-31
AT4G39730	0.014851	2.68273e-16		AT2G46680	0.0498202	9.65633e-30		AT1G02850	0.103488	5.55656e-09		AT1G04220	0.0208383	9.14436e-27		AT1G26770	0.0115573	1.00955e-27
AT2G37870	0.0755804	3.29335e-16		AT2G35070	0.0782697	3.8781e-28		AT4G21910	0.039865	2.99549e-08		AT2G46680	0.0156215	1.51514e-25		AT1G58360	0.0105194	1.33995e-27
AT1G76180	0.0238612	3.81714e-16		AT1G56650	0.0484249	8.4461e-27		AT1G05680	0.108278	3.94146e-08		AT3G19100	0.00690798	1.53937e-25		AT1G72150	-0.0112122	2.45298e-27
AT1G60190	0.0566368	9.1027e-16		AT1G21400	0.0377264	1.80063e-26		AT1G37130	-0.0412009	4.58196e-08		AT3G53400	0.0144318	1.53937e-25		AT5G15500	0.024531	3.04739e-27
AT1G07430	0.0450873	2.62096e-15		AT3G13750	-0.0290049	1.17462e-25		AT2G32160	-0.0593982	4.58196e-08		AT3G04290	-0.0109933	1.6358e-25		AT4G14090	0.0167677	3.20792e-27
AT4G39210	0.0213824	3.19938e-15		AT4G13577	0.0343086	1.61319e-25		AT5G40800	0.0965835	4.58196e-08		AT5G52300	0.0298399	2.04362e-25		AT4G12290	0.0144037	6.16659e-27
AT3G11410	0.0295938	5.61958e-15		AT2G03440	-0.0160872	6.67452e-25		AT4G13180	0.0593984	4.99738e-08		AT4G21910	0.0067116	2.06603e-25		AT4G39955	0.0200055	2.92683e-26
AT3G28040	-0.0130898	5.61958e-15		AT3G53980	0.0446121	1.10549e-24		AT5G40450	-0.0530111	8.37745e-08		AT1G69870	0.00876063	2.63832e-25		AT2G38530	0.0129776	7.84431e-26
AT3G29575	0.026459	1.40016e-14		AT3G20250	0.0213758	9.69041e-24		AT1G02820	0.0376158	8.48513e-08		AT2G35940	0.00616245	2.63832e-25		AT1G76240	-0.016981	8.87086e-26
AT1G69260	0.0586808	1.65806e-14		AT5G66400	0.0380986	1.89525e-23		AT1G59870	-0.0410808	1.0798e-07		AT1G29395	0.0101025	3.25704e-25		AT5G52300	0.0382342	1.6874e-25
AT1G01470	0.0252823	1.86932e-14		AT5G53160	-0.0300905	2.21012e-23		AT2G38170	0.0500496	1.51199e-07		AT2G32680	0.0209195	6.06887e-25		AT1G52000	0.0169921	7.08573e-25
AT4G34000	0.0271922	5.41079e-14		AT5G59310	0.101422	3.87487e-23		AT5G17220	0.0775616	1.51199e-07		AT2G35070	0.0213052	2.16788e-24		AT4G20320	0.0119927	1.89984e-24
AT4G08570	0.0797775	5.46201e-14		AT1G35720	0.0208929	1.83605e-22		AT1G66970	-0.0369981	1.59423e-07		AT1G80110	0.0143489	4.05771e-24		AT1G55960	-0.0101562	2.30615e-24
AT5G65730	-0.0386259	9.272e-14		AT4G39210	0.0306751	2.20275e-22		AT1G07430	0.116631	1.60713e-07		AT5G49730	-0.00968641	7.75972e-24		AT5G42050	0.00944028	2.30615e-24
AT2G41190	0.0487537	9.66185e-14		AT1G51140	0.0203451	2.78338e-22		AT1G79520	0.039875	1.67626e-07		AT1G52040	0.0155213	9.4522e-24		AT3G10410	0.008348	6.95258e-24
AT3G62290	0.0152327	1.43297e-13		AT2G21650	-0.0609135	6.97877e-22		AT4G23400	-0.0599142	2.02175e-07		AT2G29090	0.0118815	1.12198e-23		AT5G66650	0.0244269	8.8926e-24
AT5G40800	0.0572971	1.43297e-13		AT1G24070	0.046778	3.82021e-21		AT4G04955	-0.049964	2.19466e-07		AT5G40800	0.0155335	1.13156e-23		AT1G02930	0.0160292	1.33212e-23
AT1G72770	0.0231777	1.6982e-13		AT4G04840	-0.0408294	2.40379e-20		AT2G41190	0.0697576	4.20024e-07		AT1G19450	-0.00640783	1.41424e-23		AT4G17460	-0.0195296	2.19984e-23
AT5G53120	0.0251759	1.74942e-13		AT4G32340	-0.0314952	2.86199e-20		AT1G76530	0.0608276	4.21714e-07		AT4G16190	0.0063223	1.41679e-23		AT2G41410	0.0108998	4.07622e-23
AT5G59220	0.0732473	2.56222e-13		AT3G61890	0.0305545	3.78624e-20		AT1G76690	0.0661442	4.78896e-07		AT1G62570	0.0121423	1.97674e-23		AT1G37130	-0.0118776	1.87231e-22
AT2G39850	0.0152877	2.88782e-13		AT1G33240	-0.0198954	5.20258e-20		AT5G24155	0.0458718	5.02843e-07		AT5G02760	-0.0203003	2.76123e-23		AT2G35070	0.0282527	1.87231e-22
AT5G03210	0.0686592	4.36954e-13		AT5G64410	-0.0330272	6.12344e-20		AT3G24460	0.0443607	6.52484e-07		AT3G21950	-0.015735	2.85293e-23		AT1G68570	0.0110753	2.072e-22
AT1G60950	-0.0151375	5.83245e-13		AT5G02760	-0.0567902	7.77862e-20		AT1G62710	0.041809	6.59761e-07		AT1G52890	0.0199734	3.79408e-23		AT3G09580	-0.0100337	3.31974e-22
AT1G64660	0.0345131	1.28801e-12		AT1G62290	0.040925	1.26573e-19		AT4G08570	0.108583	7.24635e-07		AT3G61890	0.0122995	5.79544e-23		AT2G45180	-0.016467	6.97166e-22
AT1G19960	0.0276887	1.49262e-12		AT3G11660	-0.0251668	1.44056e-19		AT1G28670	-0.0375775	9.42552e-07		AT1G66960	0.0290561	1.8201e-22		AT4G28040	0.0196899	1.32274e-21
AT4G34740	-0.0221844	1.70679e-12		AT3G28220	0.0408512	2.30967e-19		AT2G27402	-0.0590329	1.6892e-06		AT5G25460	-0.00945106	3.21141e-22		AT1G05680	0.0315435	4.44587e-21
AT1G19570	0.0189108	1.96308e-12		AT4G23820	-0.0285913	3.96227e-19		AT1G49750	-0.0289259	1.89886e-06		AT1G52000	0.011797	3.56104e-22		AT2G37460	-0.0163713	1.02028e-20
AT3G27250	0.0377072	3.13684e-12		AT5G05270	0.0301837	6.62454e-19		AT2G42540	0.0628584	1.89886e-06		AT5G15230	0.0104554	5.07993e-22		AT2G41560	-0.0113769	1.26052e-20
AT3G28270	0.0287234	3.64005e-12		AT3G50970	0.0407415	6.84994e-19		AT5G42800	0.0772181	2.21906e-06		AT1G61340	0.016243	5.63695e-22		AT3G50270	-0.00819638	1.47654e-20
AT4G26080	0.0174889	3.67146e-12		AT5G26220	0.0352203	7.85243e-19		AT1G61340	0.0946038	2.53701e-06		AT2G47780	0.0184882	1.15525e-21		AT1G80130	0.0183615	2.21116e-20
AT1G51140	0.0178988	3.83395e-12		AT1G19450	-0.0164433	8.37903e-19		AT4G15490	0.0317983	2.53701e-06		AT5G57900	0.00927785	6.63439e-21		AT5G65730	-0.0206314	2.29103e-20
AT3G44860	0.0262429	5.49063e-12		AT5G48180	0.0243542	1.01427e-18		AT1G02205	0.0429236	2.69602e-06		AT4G23260	0.00744	8.31607e-21		AT5G19190	-0.0120026	2.8761e-20
AT1G56600	0.0415879	5.72592e-12		AT1G19570	0.0189541	2.08948e-18		AT4G28040	0.0812165	2.80311e-06		AT2G43610	0.0164949	8.54328e-21		AT1G63420	0.0103291	4.37133e-20
AT5G15500	0.0653715	8.40184e-12		AT4G12320	-0.0140251	2.58984e-18		AT5G25390	0.111332	3.47683e-06		AT3G29575	0.0123656	1.28785e-20		AT4G39640	-0.0123084	5.61451e-20
AT5G49910	-0.0154383	8.43515e-12		AT4G32920	0.02275	2.65726e-18		AT4G12730	-0.0468529	4.25386e-06		AT1G09080	0.0201857	1.30723e-20		AT1G75380	-0.00978896	9.65634e-20
AT5G03230	0.0253838	1.2966e-11		AT1G52190	-0.0285778	3.63922e-18		AT5G19250	-0.0285221	4.4109e-06		AT5G59220	0.0265067	1.9229e-20		AT4G13577	0.0146932	1.04425e-19
AT5G42050	0.020934	1.80073e-11		AT1G20450	0.0297072	4.99956e-18		AT4G15210	0.0791686	4.45478e-06		AT1G77450	0.0131355	6.87313e-20		AT5G63850	-0.0134648	1.07702e-19
AT2G43970	0.0150548	1.80349e-11		AT4G17460	-0.0351514	4.99956e-18		AT2G23770	-0.0718992	4.56235e-06		AT3G61280	0.0138489	6.89531e-20		AT5G07440	0.0116316	1.19273e-19
AT3G16370	-0.0112468	1.83595e-11		AT1G23390	-0.0321925	5.80447e-18		AT3G09390	0.0327901	4.83559e-06		AT4G26080	0.00729176	8.37385e-20		AT1G53430	-0.00930834	1.38145e-19
AT2G19810	0.034871	1.88822e-11		AT1G57990	-0.0533075	1.25375e-17		AT5G63790	0.0366466	4.83559e-06		AT1G17940	0.0120982	9.36016e-20		AT1G27030	0.00740103	2.03884e-19
AT5G44020	-0.0382707	1.95713e-11		AT4G37610	-0.0524873	2.49823e-17		AT5G05270	0.039376	5.20333e-06		AT1G76240	-0.0132515	9.97085e-20		AT1G53470	0.0209309	2.29547e-19
AT5G52300	0.0978775	1.95713e-11		AT4G34710	0.0362482	3.13624e-17		AT1G66100	-0.045101	5.71569e-06		AT1G80130	0.0149809	1.14221e-19		AT4G01330	-0.00959233	2.29547e-19
AT1G29660	-0.0167206	2.13842e-11		AT5G20250	-0.0595847	3.13624e-17		AT4G23130	-0.177308	5.96235e-06		AT3G05640	0.0132711	1.92805e-19		AT1G70890	-0.0105771	2.6631e-19
AT4G29060	-0.0129918	3.46441e-11		AT2G39030	0.0880218	1.00854e-16		AT3G05690	0.0466852	6.85975e-06		AT5G47380	-0.0108816	1.92805e-19		AT4G08300	-0.0305802	4.93197e-19
AT1G03630	-0.00761778	4.17746e-11		AT3G07010	-0.0290013	3.03423e-16		AT5G54610	-0.073438	6.85975e-06		AT5G17460	0.0127705	2.95089e-19		AT1G20010	-0.0100646	5.03272e-19
AT4G30460	0.0388456	5.41401e-11		AT3G45140	0.0319162	3.03423e-16		AT4G22690	-0.0432385	7.76965e-06		AT1G73390	0.00935909	3.13933e-19		AT1G58080	-0.0056696	5.07855e-19
AT5G15960	0.042116	5.96485e-11		AT5G49730	-0.0303225	3.03423e-16		AT3G16360	0.0959173	1.00665e-05		AT2G19810	0.0093278	3.27837e-19		AT2G39030	0.0325763	5.07855e-19
AT2G18050	0.0388436	7.68003e-11		AT4G33550	0.0491713	3.21376e-16		AT1G77450	0.0611371	1.25986e-05		AT5G63780	-0.00673919	3.27837e-19		AT1G69160	-0.00899977	6.31911e-19
AT4G36210	0.0176293	8.64655e-11		AT1G76180	0.0191376	4.76936e-16		AT4G34000	0.04987	1.25986e-05		AT2G21590	0.0104041	3.4163e-19		AT1G12240	-0.00830243	6.59603e-19
AT3G22231	0.0311826	1.41537e-10		AT2G40610	-0.0503208	8.16269e-16		AT5G24770	0.0621356	1.30901e-05		AT5G38430	-0.00573799	3.4163e-19		AT4G02280	0.0134241	9.8714e-19
AT1G20450	0.024732	1.48869e-10		AT5G49360	-0.0422655	1.0493e-15		AT4G04840	-0.0611322	1.7341e-05		AT5G22290	0.00770904	5.35308e-19		AT1G62290	0.016658	1.05328e-18
AT5G45650	-0.0158766	1.60445e-10		AT1G29450	-0.0295724	1.05783e-15		AT1G21400	0.0402257	2.11226e-05		AT5G57785	0.0117289	6.71985e-19		AT4G34860	0.0127466	1.27876e-18
AT1G67360	0.0248715	1.82661e-10		AT5G28770	-0.0380821	1.12414e-15		AT2G25510	-0.0464126	2.19203e-05		AT1G61800	0.0172001	7.16388e-19		AT5G40890	-0.00946434	2.69407e-18
AT2G43020	0.0153699	1.83116e-10		AT5G22920	-0.0377342	1.18302e-15		AT4G37800	-0.0442086	2.32563e-05		AT1G12900	-0.00410657	1.2027e-18		AT1G62710	0.0103643	3.55399e-18
AT3G16670	-0.0365857	2.34641e-10		AT3G28007	0.0429245	1.24943e-15		AT5G15960	0.131666	2.62425e-05		AT1G24070	0.012094	3.52261e-18		AT5G59320	0.0354683	3.75397e-18
AT4G27440	-0.0133864	2.47849e-10		AT4G14090	0.0411054	1.36371e-15		AT3G15356	-0.0530402	3.15535e-05		AT1G11210	0.0166631	4.127e-18		AT3G13750	-0.0109165	4.36386e-18
AT4G21960	0.0120655	2.52143e-10		AT5G52310	0.0346348	1.74555e-15		AT3G62150	-0.0891213	3.23677e-05		AT3G14067	0.00559517	4.3664e-18		AT5G61820	0.0118506	4.50052e-18
AT1G54100	0.0212877	2.54792e-10		AT2G45900	0.0323718	1.76165e-15		AT1G01520	0.0550841	3.52317e-05		AT3G49260	-0.00815862	5.01353e-18		AT1G54100	0.0122568	5.55938e-18
AT4G19710	-0.0140543	2.60362e-10		AT1G23480	-0.031917	2.66201e-15		AT1G69260	0.0864364	3.65649e-05		AT4G12300	0.00648434	6.98727e-18		AT1G66100	-0.0108536	1.20182e-17
AT3G06880	-0.0222348	2.82174e-10		AT1G45249	0.0240491	2.66201e-15		AT4G34590	0.0383545	3.88639e-05		AT2G23120	0.00727007	8.76624e-18		AT3G18000	0.00912822	1.41197e-17
AT2G34510	-0.0205009	3.54736e-10		AT3G61060	-0.0465037	2.66201e-15		AT5G03210	0.0918154	4.00267e-05		AT5G46240	-0.00941954	1.0459e-17		AT4G36540	-0.00858062	1.73663e-17
AT4G38740	0.0111457	4.94576e-10		AT4G24780	-0.0156296	2.6694e-15		AT1G01190	-0.0742761	4.22858e-05		AT4G14020	0.00796203	1.06053e-17		AT1G70820	-0.00635947	1.77294e-17
AT2G10940	-0.022839	5.23819e-10		AT3G18050	-0.0166018	2.76122e-15		AT1G56650	0.0669728	4.23949e-05		AT1G35710	0.0128424	1.93323e-17		AT3G45140	0.00990394	2.70267e-17
AT3G60415	0.0395609	5.30863e-10		AT3G23920	0.0142696	2.97087e-15		AT2G34850	0.0653828	4.23949e-05		AT2G33330	-0.00849594	2.03291e-17		AT1G04990	0.00877391	4.98068e-17
AT3G15790	0.0210693	5.96751e-10		AT1G68840	-0.0367613	3.71368e-15		AT1G58225	-0.157263	4.28403e-05		AT1G73680	0.00805668	2.91651e-17		AT2G02390	0.0094141	5.52105e-17
AT2G33380	0.0289	6.37857e-10		AT3G15450	-0.0390484	3.71368e-15		AT5G67385	-0.0232446	4.63109e-05		AT5G57050	0.00758376	3.0476e-17		AT2G21650	-0.0215537	1.05542e-16
AT2G45180	-0.0228746	6.86405e-10		AT1G62710	0.020834	3.71604e-15		AT3G21250	0.0386159	5.29358e-05		AT4G29110	0.00870087	4.91697e-17		AT1G75460	-0.00705496	1.66316e-16
AT4G23820	-0.0287444	7.4019e-10		AT4G22880	0.0566393	4.34418e-15		AT3G55240	0.0314243	5.89229e-05		AT5G41140	-0.00574203	4.98085e-17		AT2G21210	-0.00950171	1.73295e-16
AT5G13170	0.0521675	9.38209e-10		AT1G80440	-0.0358512	5.08982e-15		AT5G65730	-0.0694564	5.89229e-05		AT5G47180	0.00930507	5.87473e-17		AT3G25717	-0.0121979	2.32894e-16
AT3G12120	0.0102886	9.72286e-10		AT3G46600	-0.0210319	6.25028e-15		AT2G34720	0.0251313	6.33697e-05		AT5G65870	0.0150566	6.86994e-17		AT5G64410	-0.0140388	2.46298e-16
AT3G18050	-0.0115307	1.17589e-09		AT5G62280	-0.0634771	6.4631e-15		AT3G05640	0.0622013	6.70508e-05		AT4G12730	-0.0113787	9.59857e-17		AT2G45900	0.0118825	3.37396e-16
AT2G28000	-0.0171643	1.53705e-09		AT1G80110	0.0419935	7.14192e-15		AT3G17330	-0.0262842	6.70508e-05		AT4G30470	0.0119073	1.15915e-16		AT4G01390	-0.0151881	4.67806e-16
AT3G53980	0.0684258	1.59213e-09		AT5G09930	0.0790691	9.9971e-15		AT4G08850	-0.0264005	6.70508e-05		AT2G04570	0.0120822	1.34724e-16		AT4G02825	-0.0243483	7.03063e-16
AT3G56090	-0.0322915	1.64992e-09		AT2G25625	0.0321181	1.32537e-14		AT5G11610	-0.0354206	7.02064e-05		AT5G55530	0.00627303	1.60244e-16		AT5G17860	0.0137548	7.29609e-16
AT4G31860	0.0219063	1.65918e-09		AT2G41190	0.0624325	1.91465e-14		AT1G24020	0.0283287	7.0579e-05		AT3G23920	0.00667582	1.7045e-16		AT2G40610	-0.0144222	7.93173e-16
AT3G23600	0.0139168	1.75685e-09		AT3G57020	0.0170068	2.50759e-14		AT5G52882	-0.0422273	7.0579e-05		AT3G08770	-0.00829312	2.05362e-16		AT5G13240	-0.00961747	9.26914e-16
AT1G52410	0.0264034	1.78374e-09		AT4G03210	-0.0185543	4.06294e-14		AT2G33380	0.071413	7.55048e-05		AT5G18310	0.00821544	2.25739e-16		AT5G59220	0.0209643	9.26914e-16
AT2G39050	0.0296301	2.13493e-09		AT1G06080	-0.0309249	4.50182e-14		AT1G18710	0.0536223	7.59507e-05		AT1G69260	0.0232801	2.6455e-16		AT4G19170	-0.00957218	1.0678e-15
AT4G34830	-0.0103313	2.13493e-09		AT1G12500	-0.0180203	4.55228e-14		AT3G12610	-0.0342303	7.59789e-05		AT1G06080	-0.0136811	3.06279e-16		AT1G03940	0.0144014	1.08855e-15
AT1G32200	-0.0127557	2.36129e-09		AT1G35350	-0.0258341	5.47613e-14		AT2G46440	-0.0633859	8.83063e-05		AT5G18170	0.00704568	3.83613e-16		AT3G08860	0.0106978	1.08855e-15
AT3G50970	0.0342393	2.36129e-09		AT1G79520	0.0291354	6.1898e-14		AT5G48930	-0.0258401	9.11921e-05		AT4G11350	0.0141232	3.93745e-16		AT3G28220	0.0118263	1.11444e-15
AT1G73480	0.0157102	2.58337e-09		AT1G76240	-0.0337128	6.91066e-14		AT3G19553	-0.0278237	9.47636e-05		AT1G21000	0.0061438	4.67203e-16		AT3G14210	0.00638774	1.11614e-15
AT3G13120	-0.0118145	3.28026e-09		AT1G01470	0.0212995	9.56785e-14		AT1G35580	-0.0353061	0.000100096		AT5G44130	-0.0111055	4.9764e-16		AT3G28007	0.0200215	1.54974e-15
AT5G17920	-0.011119	3.3043e-09		AT1G64660	0.0590482	1.03622e-13		AT3G11660	-0.0380649	0.00010229		AT1G02205	0.0127257	5.09251e-16		AT1G49750	-0.00732098	1.85575e-15
AT2G35810	0.022139	3.79629e-09		AT2G37870	0.093658	1.03622e-13		AT5G46330	-0.0406655	0.000103949		AT5G40790	0.0229853	5.38407e-16		AT4G04955	-0.0135783	1.9715e-15
AT5G12140	0.0123532	5.02932e-09		AT3G17330	-0.020404	1.06856e-13		AT2G16380	-0.0496046	0.000106437		AT5G47330	0.0128342	6.07301e-16		AT4G23600	0.0130294	2.00528e-15
AT4G25050	-0.0149151	5.07144e-09		AT1G80130	0.0410757	1.1536e-13		AT5G13170	0.0683169	0.000106437		AT2G01420	-0.00657971	7.35385e-16		AT5G45820	-0.00834112	2.0891e-15
AT2G35060	0.0147969	5.08811e-09		AT4G12420	-0.0137721	1.1536e-13		AT5G13710	-0.0329262	0.000116247		AT1G62290	0.0113752	8.04782e-16		AT1G17830	0.0144797	2.1641e-15
AT5G38430	-0.0144624	5.57311e-09		AT4G34230	0.0177017	1.36293e-13		AT2G23120	0.0405376	0.00012169		AT2G46800	0.00700463	8.08293e-16		AT2G39050	0.0103082	3.2808e-15
AT2G34720	0.0185765	5.71622e-09		AT4G23270	-0.0227684	1.66961e-13		AT5G16570	-0.0647679	0.00012169		AT1G45145	0.0113456	8.59238e-16		AT4G15545	-0.00678726	3.84511e-15
AT3G57020	0.0161651	6.67222e-09		AT5G01520	0.0262957	1.68664e-13		AT1G01720	0.0447181	0.000121711		AT3G11410	0.00947981	9.28391e-16		AT5G28770	-0.0138331	4.68421e-15
AT5G08280	-0.0142358	6.68528e-09		AT5G22290	0.0193006	1.75754e-13		AT3G14310	-0.0309973	0.000121745		AT4G15910	0.00944827	9.28391e-16		AT5G59080	-0.010708	5.4427e-15
AT3G22235	0.0291556	6.96246e-09		AT3G55610	0.0184299	1.7835e-13		AT5G54940	-0.0287902	0.000123267		AT2G25000	0.0148709	9.68293e-16		AT3G59140	0.0100232	5.93414e-15
AT1G12900	-0.00919162	7.20639e-09		AT3G46490	-0.0299528	1.94438e-13		AT1G26770	0.0357384	0.000132433		AT1G09530	0.00759472	1.15561e-15		AT4G23820	-0.0121818	7.08005e-15
AT1G68470	0.0385957	8.05888e-09		AT1G71030	-0.0231468	2.02003e-13		AT1G75040	-0.0907495	0.000136475		AT1G68570	0.00985871	2.3101e-15		AT4G25050	-0.0061247	8.246e-15
AT1G45249	0.0218454	8.34952e-09		AT1G01520	0.0293918	2.04383e-13		AT1G67360	0.0389698	0.000138046		AT4G34000	0.00986434	2.59705e-15		AT1G68600	-0.0129492	1.14968e-14
AT5G57050	0.0222649	8.34952e-09		AT1G37130	-0.01665	2.73515e-13		AT1G76680	0.0390639	0.000138046		AT4G00700	0.0161068	2.7251e-15		AT4G32190	-0.00700253	1.14968e-14
AT1G64110	0.0652841	8.86427e-09		AT1G20010	-0.0229697	3.58655e-13		AT3G55646	-0.122894	0.000138046		AT4G03420	0.00850086	2.82253e-15		AT5G23810	0.0140789	1.20063e-14
AT5G10930	0.0223052	9.53943e-09		AT4G19120	-0.015677	3.75176e-13		AT5G64410	-0.0439055	0.000161001		AT5G24530	0.0119477	2.90496e-15		AT2G17280	0.0145768	1.23807e-14
AT2G28840	0.0132297	9.63727e-09		AT3G16850	-0.0129131	3.76934e-13		AT1G52190	-0.0371103	0.000167199		AT2G14610	0.0308451	2.92004e-15		AT5G39850	0.010498	1.29312e-14
AT4G16190	0.0144321	9.63727e-09		AT1G72770	0.0207087	3.99401e-13		AT1G01250	0.057245	0.000172724		AT3G25010	0.0139638	3.00822e-15		AT1G69295	0.0063496	2.12344e-14
AT4G21280	-0.00788062	9.63727e-09		AT5G24770	0.0504683	4.54607e-13		AT3G15510	-0.0346421	0.000178662		AT2G22420	0.0106058	3.30489e-15		AT2G22330	0.00914532	2.21357e-14
AT5G20700	0.011665	1.13733e-08		AT1G72920	-0.0316471	4.55752e-13		AT1G51140	0.0276386	0.000181347		AT5G10760	0.0163569	3.74265e-15		AT1G78450	-0.01424	2.32454e-14
AT1G17745	0.0264859	1.19124e-08		AT2G30010	-0.0385559	4.55752e-13		AT3G16240	-0.0370466	0.000211847		AT2G47485	0.0159618	4.03456e-15		AT1G01190	-0.0299574	3.17513e-14
AT1G20020	-0.00764915	1.19124e-08		AT3G15350	0.016462	4.55752e-13		AT5G40790	0.126509	0.000211847		AT3G10340	0.0072523	4.1414e-15		AT1G78460	-0.0109933	3.2849e-14
AT3G01370	-0.0119819	1.33206e-08		AT1G58360	0.0229974	5.05094e-13		AT5G50720	0.0500825	0.000217682		AT1G03290	0.00614087	4.49045e-15		AT4G16190	0.00689158	3.69275e-14
AT3G49260	-0.0180305	1.48516e-08		AT2G28190	-0.0261132	5.32529e-13		AT5G12050	-0.0385214	0.000222285		AT1G45249	0.00907912	5.6896e-15		AT5G24160	0.00806371	3.73768e-14
AT5G23060	-0.00889794	1.56641e-08		AT4G38860	-0.0224619	5.5345e-13		AT1G20450	0.0505913	0.00023429		AT4G17810	-0.00835048	6.2936e-15		AT1G07040	0.00790772	3.7813e-14
AT2G30860	0.00946214	1.66805e-08		AT5G17050	0.0211216	5.5345e-13		AT2G30520	-0.0327047	0.000244397		AT1G52190	-0.00833897	7.90905e-15		AT1G35320	0.0131894	3.90766e-14
AT4G13340	-0.02523	1.94768e-08		AT5G06760	0.109398	5.74764e-13		AT2G39770	-0.0215969	0.000260627		AT3G03170	0.0139604	1.20831e-14		AT3G44300	0.0252347	4.11872e-14
AT1G64510	-0.0118979	1.95047e-08		AT3G58120	-0.0326343	5.92176e-13		AT1G70520	-0.0430366	0.000269627		AT1G62710	0.00646707	1.43131e-14		AT5G63780	-0.00744306	4.62991e-14
AT1G55490	-0.0173424	2.0306e-08		AT3G12520	0.0203105	7.67706e-13		AT5G65080	0.0701772	0.000269627		AT2G26600	0.0063048	1.48503e-14		AT4G39950	0.0116796	4.64981e-14
AT5G21020	0.0206831	2.09613e-08		AT5G63470	-0.0245495	7.70286e-13		AT1G63420	0.0438063	0.000272509		AT1G32080	-0.00314963	1.88445e-14		AT5G27600	0.00919952	4.84957e-14
AT2G44060	0.00895129	2.34057e-08		AT2G18300	-0.0326548	1.01771e-12		AT5G59310	0.180374	0.000280655		AT2G41410	0.00751444	2.00022e-14		AT5G47880	0.00673774	5.71997e-14
AT1G01320	-0.00814964	2.44927e-08		AT3G22970	-0.0136581	1.09501e-12		AT1G21270	-0.0383342	0.00028422		AT1G75680	-0.00458779	2.03798e-14		AT5G49360	-0.0165026	6.11438e-14
AT5G46250	0.014819	2.47082e-08		AT5G45650	-0.0200364	1.19079e-12		AT5G44340	-0.0245384	0.00030104		AT5G57800	0.00741779	2.11321e-14		AT5G15350	-0.00952879	7.59241e-14
AT4G18970	-0.0280889	2.48402e-08		AT4G30460	0.0367897	1.22275e-12		AT3G22550	0.0406852	0.000308662		AT3G63190	-0.00325092	2.76041e-14		AT4G09750	0.00922532	9.58167e-14
AT4G29070	0.0152312	2.48402e-08		AT5G42800	0.0559617	1.22679e-12		AT2G46270	0.0648705	0.00032176		AT4G37790	0.00663924	2.76041e-14		AT5G23860	-0.00965032	1.11544e-13
AT2G22240	0.0151695	2.55303e-08		AT4G34000	0.0293614	1.382e-12		AT1G19670	-0.032174	0.000322687		AT1G69160	-0.00555959	3.06499e-14		AT1G19000	-0.0050269	1.22577e-13
AT3G15350	0.0171693	2.65397e-08		AT3G11410	0.028124	1.39484e-12		AT1G74810	0.0600305	0.000322687		AT1G28580	0.00801585	3.64597e-14		AT1G66970	-0.00705579	1.34124e-13
AT3G49670	-0.0127125	2.73538e-08		AT5G25610	0.0268806	1.40207e-12		AT5G49760	-0.0230761	0.000322687		AT3G01470	0.00564829	3.81637e-14		AT5G02760	-0.0204046	1.36789e-13
AT4G21650	0.0227361	2.87821e-08		AT5G24380	0.02894	1.56413e-12		AT5G66650	0.0908788	0.000322687		AT5G60890	0.00507167	3.93172e-14		AT5G14800	0.00673031	1.4162e-13
AT2G39330	0.0416039	2.87877e-08		AT3G12150	-0.0294933	1.98862e-12		AT5G45510	-0.0250379	0.000344024		AT5G06370	0.00650239	4.27044e-14		AT5G52780	-0.00991757	1.4554e-13
AT1G16850	0.0421492	3.23627e-08		AT5G54630	-0.0211524	2.16386e-12		AT3G61890	0.0351585	0.000352984		AT4G08570	0.017699	4.41044e-14		AT5G57780	-0.011264	1.45589e-13
AT3G23940	-0.0213673	3.23627e-08		AT4G08570	0.0811268	2.30051e-12		AT3G57410	-0.0254546	0.000374007		AT2G42790	0.00653315	4.78155e-14		AT3G21200	-0.00621675	1.58349e-13
AT1G62570	0.0242161	3.25256e-08		AT1G06180	0.0287163	2.84835e-12		AT2G45900	0.0397546	0.000374208		AT3G52800	0.00573116	4.88256e-14		AT1G61340	0.0174413	1.64046e-13
AT5G07690	0.0176429	3.36412e-08		AT1G44760	0.0212071	2.90202e-12		AT4G23170	-0.0464921	0.000374208		AT1G53430	-0.00643128	6.89804e-14		AT1G50010	-0.00519745	2.22621e-13
AT3G14067	0.0143324	3.40878e-08		AT1G01430	-0.0171685	2.9503e-12		AT5G02760	-0.0726502	0.000374208		AT5G03210	0.020562	7.33606e-14		AT1G13260	-0.0164207	2.36449e-13
AT1G76490	0.00904025	3.51324e-08		AT1G71970	-0.0216477	2.95103e-12		AT1G57990	-0.0733405	0.000464493		AT4G28490	0.0083982	1.30083e-13		AT5G54610	-0.0231484	2.36596e-13
AT4G19120	-0.0181927	3.65515e-08		AT5G25390	0.0492089	2.96975e-12		AT4G39210	0.0463167	0.000485511		AT2G28890	0.00663924	1.38634e-13		AT1G51805	-0.00680405	3.10383e-13
AT5G10410	0.0315372	4.01342e-08		AT4G34860	0.0305927	3.4533e-12		AT5G64280	-0.0255001	0.000485511		AT5G60900	0.0130967	1.38634e-13		AT5G13930	0.0121605	3.10383e-13
AT5G17460	0.0314455	4.25502e-08		AT5G17460	0.031409	4.01292e-12		AT5G09730	-0.0720401	0.000517648		AT2G45470	-0.00659767	1.51443e-13		AT1G16850	0.0194681	3.54462e-13
AT2G41870	0.0187241	4.31706e-08		AT1G03940	0.0359901	4.08814e-12		AT5G42530	-0.0399523	0.000559954		AT1G64110	0.0274445	1.94932e-13		AT1G52040	0.0131501	3.66952e-13
AT2G24090	-0.011368	4.4366e-08		AT1G03870	-0.0290909	4.14524e-12		AT5G49480	0.0319086	0.000609137		AT4G39350	-0.0042597	1.94932e-13		AT1G65590	-0.00883954	4.36228e-13
AT1G09750	-0.0206599	4.44344e-08		AT3G51150	-0.0139785	4.61899e-12		AT1G53430	-0.0267919	0.000617941		AT3G20250	0.00884738	2.10777e-13		AT2G43820	0.0149979	4.36228e-13
AT4G30960	0.0132542	4.644e-08		AT1G27030	0.0138789	6.62135e-12		AT3G22840	0.0359093	0.000642205		AT2G40400	-0.00420303	2.17397e-13		AT3G51860	0.0249263	4.58158e-13
AT2G30550	0.0184843	4.80005e-08		AT1G29460	-0.0261952	6.6238e-12		AT1G64200	-0.0416287	0.000647437		AT2G22330	0.00784713	2.25583e-13		AT4G34590	0.0117305	4.70124e-13
AT4G01050	-0.00483317	4.90729e-08		AT2G19810	0.032413	6.66638e-12		AT1G03740	-0.0243478	0.000709917		AT4G01610	0.00690699	2.35112e-13		AT1G77120	0.0140195	4.74895e-13
AT5G06760	0.066717	4.95901e-08		AT1G08930	-0.0478998	6.81138e-12		AT1G80130	0.0616119	0.000760708		AT1G79700	0.0118	2.37055e-13		AT4G24350	-0.00677621	5.75979e-13
AT5G64550	0.0198775	5.00485e-08		AT4G17870	-0.0167541	7.30842e-12		AT1G03220	-0.0367085	0.000761985		AT2G38110	-0.0116149	2.58794e-13		AT5G59750	-0.00820425	6.54033e-13
AT2G33330	-0.0236875	5.20523e-08		AT1G22330	-0.0349745	7.55315e-12		AT1G19630	0.071147	0.000761985		AT5G20630	-0.00836641	2.61268e-13		AT4G12980	-0.00500261	8.73439e-13
AT3G20250	0.0247705	5.45653e-08		AT1G52000	0.0493951	8.17354e-12		AT4G30270	-0.0453928	0.000766208		AT2G46430	0.0127214	2.6152e-13		AT4G26530	-0.0105492	1.0836e-12
AT3G09390	0.0175048	5.52951e-08		AT4G25050	-0.0119511	8.17354e-12		AT1G24580	0.0560506	0.000766902		AT4G21750	-0.00573268	3.12985e-13		AT1G04530	-0.00746645	1.17288e-12
AT1G79270	0.0184454	6.09144e-08		AT1G18710	0.033305	9.36197e-12		AT2G34655	-0.0596723	0.000803717		AT5G47550	0.00965266	3.73121e-13		AT4G32920	0.00653429	1.22714e-12
AT2G14878	0.0259541	6.12297e-08		AT1G67360	0.0232	9.36826e-12		AT4G01870	0.03741	0.000808723		AT5G23940	-0.0111281	3.91244e-13		AT5G42530	-0.0151603	1.23509e-12
AT2G24050	-0.0183077	6.28182e-08		AT2G29320	-0.0157933	9.52351e-12		AT4G27280	0.0464885	0.000855103		AT3G14620	0.00809335	3.9534e-13		AT1G73010	0.015494	1.42696e-12
AT5G19820	-0.0130501	6.36093e-08		AT5G17300	-0.0275338	9.59126e-12		AT4G19420	-0.0323393	0.000856074		AT3G15850	-0.00571121	4.04827e-13		AT3G18780	-0.00561892	1.46447e-12
AT4G05050	0.00735339	6.40012e-08		AT2G39050	0.0192955	1.07892e-11		AT2G37240	0.0171606	0.000857517		AT5G18130	0.00953103	4.33526e-13		AT2G16380	-0.0160908	1.69384e-12
AT5G15970	0.0187949	6.40012e-08		AT4G26530	-0.0219989	1.13091e-11		AT2G03875	-0.24988	0.000875402		AT5G01520	0.00927818	5.00569e-13		AT3G15450	-0.0161856	1.71456e-12
AT3G16240	-0.0206975	8.76593e-08		AT1G69260	0.0749	1.19177e-11		AT2G37300	0.043489	0.000881972		AT5G52750	0.0115088	6.0728e-13		AT4G39210	0.0125301	1.96229e-12
AT1G79520	0.0172022	8.96179e-08		AT3G02170	-0.0181657	1.1927e-11		AT4G39640	-0.0419797	0.000883331		AT2G39210	0.0112571	7.35398e-13		AT2G46270	0.0126286	1.99602e-12
AT3G48870	-0.018887	8.97606e-08		AT1G18620	-0.0154332	1.2176e-11		AT1G65490	-0.0388839	0.000912059		AT3G51000	0.00547096	8.43196e-13		AT5G18130	0.0113414	2.1571e-12
AT5G38410	-0.00871666	9.01293e-08		AT4G11350	0.0395273	1.22303e-11		AT2G30440	-0.0189947	0.000912059		AT1G65820	0.00487411	9.39297e-13		AT1G55360	-0.00532956	2.27929e-12
AT2G22430	0.0128764	9.01341e-08		AT5G25460	-0.0128764	1.40202e-11		AT3G18780	-0.0239893	0.000912059		AT5G24800	0.00546602	9.84619e-13		AT1G29460	-0.0123212	2.65396e-12
AT3G53460	-0.0175124	9.01341e-08		AT5G20630	-0.0186169	1.65406e-11		AT3G48720	-0.0332931	0.000914004		AT1G53240	-0.00375534	1.05485e-12		AT5G17050	0.00901668	4.05623e-12
AT4G24280	-0.0090388	9.01341e-08		AT2G17840	0.0175789	1.72434e-11		AT1G11210	0.0703379	0.000973467		AT1G01720	0.00942396	1.07362e-12		AT1G78610	0.00494152	4.28734e-12
AT4G30610	-0.0256295	9.09012e-08		AT5G19780	-0.0180574	1.76422e-11		AT2G01010	-0.362733	0.000973467		AT5G24160	0.00743807	1.18649e-12		AT5G37300	0.0172184	4.44922e-12
AT4G23630	0.0107505	9.10318e-08		AT2G45170	-0.0299398	1.84114e-11		AT4G00330	-0.0359172	0.00102143		AT1G48630	-0.00517387	1.19868e-12		AT4G11350	0.0170183	4.6993e-12
AT1G62540	0.026228	1.00704e-07		AT5G52882	-0.036559	1.91908e-11		AT3G50270	-0.0339595	0.0010958		AT3G11420	0.00725139	1.31976e-12		AT4G33540	0.00709126	5.40696e-12
AT5G01520	0.0297929	1.00704e-07		AT1G72150	-0.0249629	2.07661e-11		AT1G57590	0.0324427	0.00110031		AT3G29030	-0.00609667	1.32813e-12		AT3G51150	-0.00726415	6.48773e-12
AT5G11740	-0.0159585	1.01159e-07		AT1G77450	0.0329854	2.32309e-11		AT2G41410	0.0360387	0.00112744		AT5G64510	0.0131962	1.46106e-12		AT4G34920	-0.00602412	7.34393e-12
AT1G07320	-0.0109803	1.02067e-07		AT5G24780	0.0434025	2.50972e-11		AT1G13110	-0.0271273	0.00117876		AT4G24960	0.00627521	2.14956e-12		AT5G16980	0.0103143	7.78273e-12
AT5G43150	0.019563	1.04649e-07		AT4G21910	0.0272256	2.52498e-11		AT5G64120	-0.0795913	0.00117876		AT3G17000	0.00484669	2.43177e-12		AT1G76520	0.0124388	9.2346e-12
AT1G54575	0.046882	1.10914e-07		AT4G30270	-0.0414165	2.53642e-11		AT4G20320	0.0447117	0.00117921		AT1G16390	-0.0188226	2.79899e-12		AT3G50910	0.00831309	9.66465e-12
AT3G48730	-0.0126746	1.10914e-07		AT1G01190	-0.0522263	2.78885e-11		AT5G45340	0.0891437	0.0012329		AT4G32940	0.00617226	3.06808e-12		AT5G50950	-0.0115267	9.76584e-12
AT4G34710	0.0128328	1.12439e-07		AT1G24580	0.047214	2.91976e-11		AT3G54830	-0.0537182	0.00124819		AT1G69200	-0.00476069	3.14622e-12		AT2G26355	0.0118972	1.00994e-11
AT5G24120	0.016432	1.12644e-07		AT5G19250	-0.0160497	3.02225e-11		AT4G16750	0.0476037	0.00124819		AT5G16030	-0.00481475	3.79315e-12		AT5G12930	0.0134491	1.00994e-11
AT3G43720	-0.0162195	1.12721e-07		AT5G44130	-0.0223026	3.02225e-11		AT3G04720	-0.046176	0.00125038		AT3G56710	0.0108256	3.99297e-12		AT1G77450	0.0130372	1.01167e-11
AT5G39570	0.0104548	1.2019e-07		AT3G55646	-0.0728295	3.43255e-11		AT4G23820	-0.0381353	0.00128765		AT1G20010	-0.00632617	4.10013e-12		AT4G16760	0.00579825	1.03934e-11
AT3G02020	0.0167108	1.3951e-07		AT3G48240	0.0309991	3.55488e-11		AT2G14610	-0.17887	0.00136197		AT5G63790	0.00637083	4.32976e-12		AT1G18330	-0.00949769	1.08595e-11
AT5G52310	0.0269731	1.52919e-07		AT5G10770	-0.0262104	3.67921e-11		AT2G46830	0.0184192	0.00136563		AT5G02020	0.0182021	4.8219e-12		AT2G25510	-0.0132227	1.10714e-11
AT4G34050	0.00802694	1.55723e-07		AT2G28950	-0.0136356	3.79636e-11		AT1G67300	0.0324594	0.00136745		AT3G51860	0.0163975	4.93672e-12		AT1G65060	0.00972227	1.1393e-11
AT2G47940	-0.0113826	1.56199e-07		AT2G32100	-0.0199433	3.9498e-11		AT2G19810	0.0459763	0.00136745		AT3G10500	0.00702515	5.86332e-12		AT4G15080	0.00688347	1.22862e-11
AT3G48080	0.0406711	1.56199e-07		AT2G39800	0.0425912	3.96359e-11		AT1G17940	0.0384565	0.00140537		AT3G28540	0.0102324	6.27971e-12		AT4G22690	-0.00831524	1.22862e-11
AT3G52800	0.0169589	1.60164e-07		AT3G06070	-0.0318918	3.96359e-11		AT1G33600	-0.0285258	0.0014351		AT5G64430	0.00609855	6.72351e-12		AT1G29050	0.0116453	1.24003e-11
AT4G12730	-0.0190574	1.61321e-07		AT3G16670	-0.0293537	3.9706e-11		AT5G10770	-0.036777	0.00146565		AT5G19875	0.00895852	6.95718e-12		AT5G67480	0.00959364	1.26898e-11
AT3G45780	-0.00805346	1.72628e-07		AT5G55400	0.0174147	3.9706e-11		AT2G35070	0.088642	0.00147692		AT4G10960	0.0160976	7.22936e-12		AT1G32870	0.0079014	1.33398e-11
AT2G42790	0.0208781	1.84456e-07		AT5G52900	-0.0191734	3.98454e-11		AT2G39690	0.0409968	0.00161881		AT2G39050	0.00745793	7.34666e-12		AT1G76990	-0.00660145	1.33398e-11
AT5G46580	-0.013981	1.96299e-07		AT5G05890	-0.0188698	4.00147e-11		ATCG00920	-0.207193	0.00164412		AT2G46690	0.00589824	7.35633e-12		AT3G59820	0.00756863	1.33398e-11
AT1G32990	-0.0123171	2.05043e-07		AT5G53120	0.0245773	4.08502e-11		AT1G65900	0.0317693	0.00165216		AT4G31820	0.00474656	7.62109e-12		AT1G72880	-0.00748962	1.4676e-11
AT2G42540	0.0193239	2.21496e-07		AT5G44020	-0.0492815	4.47911e-11		AT4G13340	-0.0336936	0.0017238		AT3G15720	0.0126737	7.91405e-12		AT5G16400	-0.00652557	1.64425e-11
AT1G79970	0.0145487	2.22623e-07		AT1G52827	0.0299838	4.72806e-11		AT4G24780	-0.0185383	0.00175122		AT1G19180	0.00999211	8.7541e-12		AT5G60100	0.0198027	1.715e-11
AT5G60900	0.0301729	2.24384e-07		AT1G75170	0.022283	4.72806e-11		AT5G65070	0.089271	0.0017664		AT3G16030	0.0105028	9.11453e-12		AT4G20070	0.00592705	1.74932e-11
AT4G01310	-0.0121998	2.35141e-07		AT5G13170	0.073363	5.19826e-11		AT3G26230	-0.0496125	0.00176795		AT1G07630	0.00632212	9.4355e-12		AT2G29290	-0.00759584	1.84871e-11
AT3G52150	-0.0133961	2.4708e-07		AT5G23860	-0.0210915	5.30213e-11		AT3G52360	-0.0278048	0.00176795		AT1G59990	-0.00452023	1.04787e-11		AT5G42800	0.0219358	1.92988e-11
AT5G15350	-0.0246793	2.51077e-07		AT1G64110	0.110407	5.47258e-11		AT1G61800	0.113836	0.00177335		AT1G62810	0.00631729	1.04787e-11		AT4G31820	-0.00799526	1.93343e-11
AT3G01520	0.0151473	2.54127e-07		AT2G04350	0.0125975	5.61073e-11		AT2G25625	0.0476798	0.00178688		AT4G27870	0.00369518	1.05038e-11		AT4G30110	-0.0104255	1.94674e-11
AT1G56050	-0.0154969	2.76576e-07		AT1G76990	-0.0193444	5.82346e-11		AT5G15190	0.0637406	0.00178688		AT1G04830	0.00521406	1.08331e-11		AT4G24780	-0.00663645	1.97788e-11
AT1G64720	0.012915	2.79409e-07		AT5G18020	-0.0228582	5.85781e-11		AT2G30600	-0.0442309	0.00180929		AT5G63800	-0.00348677	1.15463e-11		AT1G52190	-0.0114223	1.97917e-11
AT3G55610	0.0100539	3.0285e-07		AT1G56600	0.0474445	5.92054e-11		AT3G54390	0.0296429	0.00184749		AT2G21140	-0.00942884	1.19886e-11		AT5G15230	0.00860043	2.41936e-11
AT2G28890	0.0185862	3.22028e-07		AT2G16380	-0.0346114	6.03474e-11		AT2G29090	0.0440497	0.00187796		AT3G14570	0.00580733	1.3267e-11		AT2G35960	-0.00648315	2.45759e-11
AT3G26650	-0.0060673	3.32944e-07		AT4G10120	-0.0257247	6.03474e-11		AT2G28500	0.0774125	0.00189347		AT5G67280	-0.00392485	1.36131e-11		AT2G43560	-0.00492387	2.61867e-11
AT1G48300	0.0132914	3.4055e-07		AT1G17830	0.0349458	6.18664e-11		AT4G22590	0.030272	0.00191274		AT2G05520	0.0100742	1.47021e-11		AT1G67900	-0.00560772	2.77196e-11
AT1G69040	-0.0193776	3.62906e-07		AT1G49750	-0.0191643	6.48605e-11		AT1G01430	-0.036957	0.00192673		AT4G33040	0.00951898	1.47021e-11		AT1G48260	-0.0121414	2.87942e-11
AT3G05730	-0.0296777	3.70232e-07		AT4G16590	0.108266	7.74124e-11		AT1G33590	-0.0243977	0.00194153		AT1G49450	0.0105583	1.58981e-11		AT3G19100	0.00612167	3.01944e-11
AT3G16470	0.0238909	3.85452e-07		AT4G36540	-0.0204333	7.81607e-11		ATCG00950	-0.22396	0.00202873		AT5G16590	-0.00644592	1.61402e-11		AT4G04040	-0.00750262	3.08374e-11
AT5G18570	-0.0140276	3.85452e-07		AT1G68570	0.0248949	7.97758e-11		AT3G11410	0.0375979	0.00208272		AT2G34510	-0.00831321	1.66586e-11		AT1G62570	0.0131345	3.18205e-11
AT1G58290	-0.0105213	3.86845e-07		AT2G44300	0.024736	8.47985e-11		AT5G15500	0.073702	0.00208272		AT2G37710	0.00494887	1.91125e-11		AT4G37800	-0.010385	3.40652e-11
AT2G05520	0.0176719	3.93362e-07		AT5G49740	-0.0231162	8.91943e-11		ATCG01180	-0.216846	0.00216221		AT4G22820	0.0068547	2.13736e-11		AT4G36040	-0.0105054	3.60947e-11
AT2G33800	-0.0113974	3.93362e-07		AT3G10340	0.017095	9.94822e-11		AT2G30010	-0.054699	0.00232013		AT3G09390	0.00815056	2.25138e-11		AT5G19440	0.00836981	4.33807e-11
AT2G40490	-0.0124546	4.20214e-07		AT5G03395	0.0270326	9.98673e-11		AT2G18660	-0.117129	0.00236009		AT4G32340	-0.0104637	2.36424e-11		AT3G52840	-0.00676353	4.96458e-11
AT1G35680	-0.0121648	4.28732e-07		AT1G21830	-0.024505	1.00461e-10		AT5G38100	-0.0790954	0.00245172		AT5G42050	0.00839666	2.74891e-11		AT4G12730	-0.0104902	5.46332e-11
AT1G45145	0.035156	4.28732e-07		AT5G64080	0.0223677	1.11557e-10		AT5G12140	0.0207706	0.00268977		AT4G38860	-0.00615471	2.8671e-11		AT5G17220	0.0213919	5.46578e-11
AT4G38680	-0.0127065	4.32247e-07		AT2G30520	-0.0180198	1.17097e-10		AT3G55610	0.021249	0.00285022		AT3G56880	0.00705052	2.90008e-11		AT2G36930	0.00646089	5.70551e-11
AT5G24770	0.0465823	4.34331e-07		AT1G11350	-0.0172884	1.20601e-10		AT1G12500	-0.0269809	0.00285285		AT1G67360	0.00837904	2.90959e-11		AT2G46680	0.0139	5.89184e-11
AT1G06950	-0.0155818	4.51722e-07		AT3G19553	-0.0183871	1.71351e-10		AT5G58670	-0.0292461	0.00295015		AT5G04080	0.00856905	2.9777e-11		AT1G19350	-0.0066813	5.9726e-11
AT2G23120	0.0162925	4.51722e-07		AT3G28270	0.0563819	1.72095e-10		AT4G18280	0.0405936	0.00300621		AT3G21200	-0.00382508	3.00448e-11		AT1G35680	-0.00447349	6.91083e-11
AT3G06530	-0.0257139	4.60714e-07		AT1G28670	-0.0219995	1.87513e-10		AT5G16970	0.0252425	0.00314189		AT5G55620	-0.0065487	3.00448e-11		AT2G45570	0.0300125	7.15891e-11
AT3G27830	-0.00913781	4.63088e-07		AT4G38740	0.0159426	1.9618e-10		AT1G68600	-0.0424198	0.00314388		AT5G66740	-0.00916004	3.16356e-11		AT2G03440	-0.00618752	7.53512e-11
AT5G25390	0.0605117	4.63201e-07		AT4G39400	-0.0119588	2.26745e-10		AT5G61600	0.0762223	0.00314388		AT1G29390	0.00398077	3.16449e-11		AT4G13830	-0.00559412	7.72972e-11
AT1G62810	0.0216442	4.6591e-07		AT5G58670	-0.0293849	2.26954e-10		AT5G49730	-0.0353221	0.00318998		AT1G72970	-0.00568493	3.19729e-11		AT1G68190	-0.0121143	9.20985e-11
AT3G56340	-0.0156955	4.71834e-07		AT1G25230	-0.0278826	2.41807e-10		AT1G04570	0.0546641	0.00321007		AT5G45820	-0.00493632	3.2611e-11		AT4G01480	0.0118989	1.01394e-10
AT5G61170	-0.0174648	4.87636e-07		AT2G35960	-0.0150869	2.41807e-10		AT1G70290	-0.0455989	0.00327423		AT3G49670	-0.00504649	3.37801e-11		AT1G22330	-0.0164678	1.04689e-10
AT2G18940	-0.0140929	5.60831e-07		AT4G23130	-0.125965	2.50377e-10		AT1G72150	-0.0415562	0.00347149		AT4G18210	0.00886028	3.37801e-11		AT1G22570	-0.0138408	1.06158e-10
AT4G25080	-0.00816813	5.78699e-07		AT5G10080	0.0250694	2.53875e-10		AT1G19450	-0.0254721	0.0035946		AT1G21400	0.0104206	3.49072e-11		AT5G64080	0.00950666	1.06484e-10
AT4G34290	-0.0154318	6.53637e-07		AT1G55320	0.0215188	2.64145e-10		AT1G65930	-0.0297742	0.00367878		AT1G72430	-0.0100694	3.63086e-11		AT2G29140	0.00489994	1.12801e-10
AT2G33530	0.0169606	7.08057e-07		AT3G28910	-0.0226388	2.68153e-10		AT5G65010	-0.0287402	0.00368019		AT3G16570	0.00581502	3.63086e-11		AT5G19250	-0.00674916	1.23598e-10
AT5G19780	-0.016391	7.15949e-07		AT5G65140	0.017752	2.76459e-10		AT5G28020	-0.0217114	0.00369396		AT3G21750	0.00491465	3.63086e-11		AT5G27290	-0.00730234	1.30781e-10
AT3G29240	0.0115231	7.19656e-07		AT3G15790	0.0177256	2.7689e-10		AT4G24960	0.023653	0.00372214		AT5G43450	0.0088038	3.63587e-11		AT2G40490	-0.00487538	1.32024e-10
AT1G03290	0.0209696	7.2454e-07		AT3G54820	0.0259238	3.09214e-10		AT5G17460	0.0582325	0.00375441		AT1G26945	-0.00752444	4.17958e-11		AT4G27300	-0.00961126	1.35813e-10
AT2G17840	0.0204412	7.28813e-07		AT5G52300	0.122084	3.17136e-10		AT2G22080	0.0274299	0.00385598		AT3G63200	-0.00472356	4.3386e-11		AT1G31330	-0.00470643	1.36141e-10
AT1G25450	-0.0353933	7.2985e-07		AT5G04190	-0.0416657	3.20412e-10		AT2G41380	0.0640227	0.00395848		AT1G80050	-0.00749525	5.12801e-11		AT4G19530	-0.00629041	1.41214e-10
AT3G60320	-0.0111304	7.32253e-07		AT3G19100	0.0163678	3.30051e-10		AT1G16090	0.0320745	0.00396365		AT5G40780	0.0113004	5.16313e-11		AT2G46600	0.00799508	1.59217e-10
AT5G22390	0.0166282	7.32253e-07		AT3G55120	0.0235276	4.05802e-10		AT2G03865	-0.179754	0.00396365		AT1G13650	-0.00741194	5.32074e-11		AT1G45616	0.0188168	1.67839e-10
AT1G24147	0.0222363	7.32932e-07		AT2G34720	0.016168	4.10602e-10		AT3G21460	-0.0787738	0.00405512		AT3G27690	-0.00329091	5.34483e-11		AT1G28670	-0.0108119	1.78058e-10
AT3G51895	0.0108268	7.76397e-07		AT2G37760	0.0294739	4.21625e-10		AT1G06360	0.0204292	0.00408602		AT5G08610	-0.00558586	5.5408e-11		AT1G75040	-0.0225007	2.06062e-10
AT3G03710	-0.0130699	7.88773e-07		AT1G33600	-0.0192715	4.36641e-10		AT1G60960	0.0385866	0.00408602		AT5G15860	0.00667158	5.70855e-11		AT5G25110	0.0129995	2.56059e-10
AT5G47560	0.0149022	8.405e-07		AT1G59870	-0.0274792	4.37209e-10		AT4G34710	0.0347891	0.00408602		AT5G15960	0.0220526	5.70855e-11		AT1G14700	-0.00776849	2.72092e-10
AT2G16600	0.00813946	8.48766e-07		AT1G67300	0.0230765	4.37209e-10		AT5G57050	0.0283147	0.00411308		AT1G12420	0.00712361	6.00164e-11		AT3G01480	-0.00504812	2.75968e-10
AT1G67740	-0.00728399	8.59994e-07		AT1G53430	-0.0217027	4.78415e-10		AT2G46330	-0.0297389	0.00413033		AT2G32800	0.00685077	6.28492e-11		AT4G12320	-0.00515507	2.85232e-10
AT5G46240	-0.0161074	8.59994e-07		AT2G30600	-0.0270031	4.87078e-10		AT5G06930	-0.0465649	0.00413033		AT2G46270	0.0172684	6.51157e-11		AT5G54940	-0.0067321	2.99785e-10
AT1G16410	0.0120513	9.2092e-07		AT1G78460	-0.0194127	4.89904e-10		AT4G00950	-0.0446436	0.00415525		AT3G03341	0.0233251	6.5473e-11		AT2G24060	-0.00578126	3.03326e-10
AT1G02500	0.00902509	9.27333e-07		AT5G44050	0.0199878	4.98694e-10		AT2G27820	-0.0199426	0.00417127		AT4G04890	-0.00525624	6.71327e-11		AT4G10960	0.0188405	3.4064e-10
AT3G11630	-0.00953694	9.80597e-07		AT1G62570	0.0272977	5.03044e-10		AT4G36010	0.0327943	0.00434706		AT1G67300	0.00633784	7.26067e-11		AT5G43450	0.00896445	3.45966e-10
AT1G53240	-0.0089759	9.83075e-07		AT5G49760	-0.0149366	5.60881e-10		AT1G60190	0.0876865	0.00438696		AT3G50270	-0.00635377	7.54486e-11		AT1G09500	0.02846	3.50203e-10
AT3G26100	0.0136533	1.02752e-06		AT2G20950	-0.0141775	5.7413e-10		AT5G24380	0.041772	0.00438696		AT4G36990	0.00753186	7.79257e-11		AT1G32200	-0.00601886	3.61326e-10
AT4G31850	-0.0112079	1.04367e-06		AT1G21270	-0.0260233	6.03353e-10		AT3G50740	-0.0274632	0.00438771		AT1G19570	0.00557177	8.39019e-11		AT4G37610	-0.0242699	3.71386e-10
AT1G19450	-0.0133377	1.07527e-06		AT5G38990	-0.0125169	6.62127e-10		AT3G16850	-0.0263961	0.00440152		AT2G16630	0.0115865	8.74641e-11		AT1G01620	-0.00568895	3.75398e-10
AT3G07360	0.0151064	1.10414e-06		AT5G17220	0.053396	7.30586e-10		AT4G23990	0.0297041	0.00445382		AT3G47380	-0.019005	9.76083e-11		AT1G74940	-0.0101864	3.89679e-10
AT1G22690	-0.0279358	1.13759e-06		AT5G46330	-0.0316274	7.74999e-10		AT1G16390	-0.0505691	0.00449299		AT5G67480	0.00725368	9.91876e-11		AT5G08650	-0.00583818	4.04993e-10
AT5G44680	-0.0151227	1.13759e-06		AT5G61820	0.0244926	7.80333e-10		AT1G18330	-0.0336242	0.00449299		AT1G70300	0.00639387	1.04438e-10		AT5G16030	-0.0065035	4.22511e-10
AT5G17710	-0.0126855	1.16736e-06		AT5G25190	-0.0314206	7.84688e-10		AT3G24480	-0.0360034	0.00449299		AT1G30500	0.00686735	1.09548e-10		AT4G29900	0.00591973	4.38184e-10
AT5G47190	-0.0141042	1.20618e-06		AT2G44740	-0.0414347	8.12367e-10		AT5G04930	-0.0189777	0.00449299		AT4G23880	0.00946231	1.13462e-10		AT1G13110	-0.00718135	4.52476e-10
AT5G19770	-0.0107626	1.2818e-06		AT2G25200	-0.0329491	8.57031e-10		AT5G12840	0.0205404	0.00449299		AT2G04160	0.0059648	1.19657e-10		AT4G27430	-0.00566873	4.72387e-10
AT5G53300	0.00836503	1.29373e-06		AT4G31130	-0.0159051	8.63704e-10		AT1G55320	0.0369589	0.0044937		AT5G19440	0.00453201	1.26176e-10		AT5G62210	0.0125003	4.91478e-10
AT3G51000	0.0173161	1.32717e-06		AT3G25717	-0.0181991	8.72301e-10		AT1G58602	-0.0179394	0.00456083		AT4G21280	-0.00326758	1.27371e-10		AT5G22580	-0.010706	5.3111e-10
AT1G31580	0.0162587	1.32839e-06		AT1G56120	-0.0275623	9.45204e-10		AT2G30540	0.0452677	0.00456776		AT2G16500	-0.00368816	1.30099e-10		AT1G58602	-0.00650924	5.49131e-10
AT3G15850	-0.0114797	1.33328e-06		AT3G04210	-0.0605572	9.45204e-10		AT5G67180	0.0211117	0.00463226		AT3G04720	0.00825544	1.37156e-10		AT3G05400	0.0107334	5.5735e-10
AT5G23010	0.0123571	1.35578e-06		AT5G23940	0.0149525	9.90313e-10		AT3G57400	-0.0197354	0.0046884		AT2G26440	0.00938722	1.40965e-10		AT5G49730	-0.0103531	5.60698e-10
AT3G12580	0.025546	1.36925e-06		AT4G17030	0.0213755	9.97663e-10		AT1G02640	-0.0540883	0.00477383		AT2G39030	0.0225383	1.4869e-10		AT4G04340	-0.00542198	5.84909e-10
AT2G20630	0.00929833	1.37558e-06		AT1G61800	0.0579206	1.00309e-09		AT2G21590	0.0425124	0.00477383		AT4G09500	0.00712933	1.4869e-10		AT4G39710	-0.00580332	5.84909e-10
AT5G55220	-0.015472	1.43015e-06		AT1G19630	0.0312646	1.03451e-09		AT3G07010	-0.0300102	0.00480143		AT3G16990	0.00752685	1.54454e-10		AT4G22880	0.0217878	6.16519e-10
AT5G30510	-0.00694643	1.54263e-06		AT4G12730	-0.021411	1.04749e-09		AT5G10760	-0.105106	0.00480143		AT1G22690	-0.0103296	1.60261e-10		AT1G01430	-0.00694282	6.8549e-10
AT4G03420	0.0191003	1.60195e-06		AT5G61590	-0.0285686	1.09837e-09		AT2G39800	0.0609564	0.00484278		AT5G49740	-0.00637409	1.70404e-10		AT1G01720	0.010974	7.6489e-10
AT3G28540	0.0362366	1.66209e-06		AT1G45616	0.0371845	1.17422e-09		AT5G53160	-0.034544	0.00497381		AT1G56650	0.0119161	1.74178e-10		AT3G03310	0.00758879	7.73109e-10
AT5G03190	0.0172117	1.70079e-06		AT2G01420	-0.0184188	1.19836e-09		AT1G16850	0.0717191	0.004994		AT3G54820	0.00821111	1.92027e-10		AT3G56970	-0.0242164	7.85452e-10
AT5G43850	0.0131213	1.83351e-06		AT2G23120	0.0217206	1.19836e-09		AT3G16530	-0.0949467	0.00501105		AT4G18970	-0.00731288	1.97888e-10		AT3G23570	0.00547355	7.98065e-10
AT1G04040	-0.0322361	1.84436e-06		AT3G50270	-0.0196035	1.41835e-09		AT1G35350	-0.0382933	0.0051016		AT2G21650	-0.0105453	1.99232e-10		AT4G27830	0.006672	8.56669e-10
AT5G42300	0.0110591	1.88932e-06		AT3G03900	0.0169845	1.42204e-09		AT1G71970	-0.0317632	0.00520945		AT4G09650	-0.00468655	1.99232e-10		AT2G19810	0.0103864	8.5872e-10
AT5G49030	-0.00834012	1.90043e-06		AT3G29575	0.032026	1.48958e-09		AT2G20950	-0.0237384	0.00522176		AT1G68530	0.00735869	2.08568e-10		AT1G17745	0.0109321	8.87079e-10
AT1G78070	0.0136787	2.02201e-06		AT2G36320	-0.0142397	1.52252e-09		AT5G43150	0.0284505	0.00522176		AT3G55290	0.00760019	2.14302e-10		AT2G42600	-0.007843	1.14213e-09
AT1G67300	0.0154735	2.04536e-06		AT1G08830	-0.0240026	1.62058e-09		AT3G22060	-0.0463781	0.00552075		AT2G24180	0.00537117	2.18397e-10		AT5G49760	-0.00697885	1.14963e-09
AT1G80130	0.0255608	2.04994e-06		AT4G12980	-0.0156015	1.73882e-09		AT3G57680	0.0341388	0.00552075		AT1G80820	0.0103627	2.45817e-10		AT5G06290	-0.00321883	1.18811e-09
AT3G25660	-0.00979708	2.09723e-06		AT5G46830	0.030958	1.73882e-09		AT3G27250	0.0677681	0.00552768		AT2G17120	0.00709563	2.59831e-10		AT1G72680	0.012759	1.25631e-09
AT3G63490	-0.00752628	2.1485e-06		AT1G79270	0.0147532	1.73962e-09		AT5G13930	0.0339802	0.00552768		AT3G04550	-0.00450125	2.60471e-10		AT1G16300	0.00764729	1.33806e-09
AT1G58270	0.0250995	2.24306e-06		AT3G62150	-0.0532022	1.73962e-09		AT1G71340	0.0223551	0.005594		AT5G04750	0.00460144	2.69867e-10		AT5G66530	-0.00486801	1.34978e-09
AT2G35940	0.0126249	2.33509e-06		AT5G15230	0.0166048	1.87001e-09		AT4G26690	-0.0247702	0.00561711		AT1G19940	-0.0224416	2.80533e-10		AT2G47800	0.0123022	1.38174e-09
AT5G58420	-0.0171327	2.42732e-06		AT1G14430	-0.0294844	1.90343e-09		AT5G27600	0.0266244	0.00564488		AT1G04520	-0.00600676	2.8749e-10		AT3G57260	-0.0350678	1.46922e-09
AT4G14040	0.0111648	2.4956e-06		AT3G21250	0.0123883	1.92818e-09		AT1G72770	0.0245192	0.00577049		AT4G30490	0.00519381	2.8778e-10		AT1G66760	0.0101104	1.47701e-09
AT5G60360	0.0126323	2.6748e-06		AT1G57590	0.0260837	2.10093e-09		AT5G07990	0.0489307	0.00590924		AT5G44340	-0.00513224	2.98172e-10		AT3G53980	0.0119636	1.48343e-09
AT4G23670	0.0135642	2.67636e-06		AT1G68470	0.0272953	2.18741e-09		AT4G12980	-0.0159552	0.00596623		AT1G19660	0.00414737	3.124e-10		AT1G61890	0.00761218	1.53696e-09
AT4G08470	0.0180443	2.73897e-06		AT1G77280	0.0163876	2.50237e-09		AT4G34550	0.0304491	0.0060434		AT3G22740	0.00706328	3.29302e-10		AT5G13490	0.0118611	1.54089e-09
AT4G18480	-0.00930898	2.74054e-06		AT1G58225	-0.0982653	2.69199e-09		AT2G22500	0.0343669	0.00623248		AT1G22160	0.00742462	3.38147e-10		AT5G14780	0.00681253	1.56441e-09
AT4G35100	-0.019207	2.74054e-06		AT3G46450	0.01567	2.70584e-09		AT1G52750	-0.0529363	0.00635389		AT3G13175	0.00743269	3.38147e-10		AT1G12845	0.00906432	1.66893e-09
AT1G78850	0.0149134	2.74866e-06		AT1G09210	-0.0129342	2.87835e-09		ATCG00410	-0.15799	0.00639571		AT3G62290	0.0040485	3.51295e-10		AT1G71970	-0.0108803	1.96277e-09
AT4G23050	0.0168799	2.75901e-06		AT5G38100	-0.0606711	2.882e-09		AT3G26570	-0.0180808	0.00649514		AT5G58160	0.00610684	3.52033e-10		AT2G41190	0.0171322	2.08455e-09
AT2G47180	0.0227786	2.82116e-06		AT5G14120	-0.0170377	2.88921e-09		AT3G28040	-0.019519	0.00654947		AT2G23350	-0.00347282	3.52515e-10		AT5G10760	-0.0176245	2.14231e-09
AT4G10450	-0.02098	2.82116e-06		AT2G18660	-0.0994295	3.26076e-09		AT2G37760	0.0380072	0.00656323		AT2G45180	-0.0119682	3.79763e-10		AT1G68238	-0.0164148	2.15146e-09
AT4G09650	-0.00706945	2.86379e-06		AT1G28960	0.015852	3.30937e-09		AT1G03870	-0.045036	0.00662052		AT4G36648	0.00563311	3.89821e-10		AT1G25530	0.011597	2.15252e-09
AT1G49050	0.0233133	2.89035e-06		AT1G65960	-0.0113598	3.30937e-09		AT1G63350	-0.0506561	0.00664358		AT5G47560	0.00475003	3.95192e-10		AT4G13850	0.00456863	2.18044e-09
AT5G14120	-0.0169917	2.94241e-06		AT2G33330	-0.0167951	3.38429e-09		ATCG01210	-0.182575	0.00664358		AT1G60190	0.0171238	3.98223e-10		AT1G79440	0.00655919	2.28223e-09
AT1G65590	-0.0161094	2.96114e-06		AT4G22690	-0.025099	3.38429e-09		AT1G77210	-0.0473135	0.00666825		AT4G28680	0.00808126	4.15272e-10		AT5G54630	-0.00892503	2.36517e-09
AT3G05345	0.0154089	2.96114e-06		AT4G37180	0.0156078	3.73324e-09		AT2G01021	-0.203933	0.00675381		AT3G46740	-0.00352011	4.41426e-10		AT2G25910	0.00578127	2.703e-09
AT1G29070	-0.0116417	2.99297e-06		AT5G13930	0.030136	3.9677e-09		AT1G60590	0.0218624	0.00685887		AT3G58120	-0.0106953	4.45442e-10		AT5G22390	-0.00746788	2.82594e-09
AT1G42990	0.0225973	2.99821e-06		AT4G02825	-0.0427494	4.01599e-09		AT2G27060	-0.0209578	0.00703416		AT1G69252	0.0071121	4.58308e-10		AT3G55120	0.00880603	2.858e-09
AT3G60300	0.0149992	3.18115e-06		AT5G15350	-0.0191035	4.25382e-09		AT3G41768	-0.159322	0.00713257		AT4G23820	-0.00911054	4.61046e-10		AT1G11210	0.0156826	2.87851e-09
AT4G34220	-0.010221	3.29321e-06		AT1G69160	-0.0151992	4.3484e-09		AT1G21130	-0.0319233	0.00734121		AT3G28180	-0.0057526	4.76611e-10		AT3G14840	-0.00600999	2.90998e-09
AT1G11840	0.00799312	3.5066e-06		AT5G63780	-0.0178939	4.3484e-09		AT4G17870	-0.0359646	0.00734121		AT1G24580	0.0111091	5.08369e-10		AT1G16390	-0.0161672	3.01769e-09
AT2G21590	0.0230668	3.62972e-06		AT1G66970	-0.0147269	4.52795e-09		AT1G18740	-0.0257327	0.00739104		AT3G17390	-0.00632773	5.2314e-10		AT2G29310	-0.00763549	3.13323e-09
AT2G39310	0.061677	3.92866e-06		AT1G52030	0.0290201	4.76662e-09		AT5G03280	-0.0161406	0.00754458		AT1G33240	-0.00458427	5.52536e-10		AT2G32100	-0.0109507	3.15695e-09
AT1G77940	-0.0174548	4.0394e-06		AT2G37480	-0.0139174	4.82074e-09		AT5G23860	-0.0347743	0.00761081		AT3G28940	0.00571039	5.91478e-10		AT4G10120	-0.00816064	3.38077e-09
AT5G26742	-0.00699306	4.18389e-06		AT5G44340	-0.0127196	4.99961e-09		AT1G20693	0.017133	0.00786654		AT5G26340	0.00824438	5.92445e-10		AT5G65010	-0.00690484	3.38181e-09
AT1G10840	-0.0111629	4.23129e-06		AT3G18780	-0.0121429	5.29486e-09		AT2G34490	-0.0324601	0.00786654		AT2G33850	-0.00992675	6.22074e-10		AT5G61790	-0.00769259	3.41915e-09
AT5G42530	0.0178937	4.4515e-06		AT3G54390	0.0206559	5.49647e-09		AT3G53260	-0.0253882	0.00786654		AT3G15790	0.00578739	6.22074e-10		AT4G35300	0.00586631	3.49703e-09
AT3G13470	-0.0175601	4.54671e-06		AT5G26920	-0.0349631	5.51914e-09		AT5G19770	-0.0234292	0.00794007		AT5G53420	0.00594495	6.2294e-10		AT4G01870	0.00919968	3.56867e-09
AT1G33811	-0.0253616	4.57047e-06		AT3G48590	-0.0177037	5.61218e-09		AT4G23670	0.0263374	0.00825965		AT3G15350	0.00501494	6.32837e-10		AT1G69260	0.017194	3.58249e-09
AT1G53430	-0.0128511	4.57047e-06		AT2G12400	0.0134228	5.61447e-09		AT2G45470	-0.0249895	0.00826284		AT3G06980	-0.00389037	6.39844e-10		AT4G12130	0.0082951	3.77528e-09
AT3G48240	0.0371188	4.76151e-06		AT3G21200	-0.00989337	5.63252e-09		AT4G19530	-0.0233396	0.00826284		AT3G48730	-0.00391081	6.63171e-10		AT2G40400	-0.00471503	4.00538e-09
AT1G10960	-0.00958946	4.85834e-06		AT5G43400	0.0202087	5.8099e-09		ATMG00030	-0.138195	0.00831646		AT1G52855	0.0127513	6.65263e-10		AT5G36910	-0.0133029	4.0901e-09
AT5G66040	0.0147264	4.94788e-06		AT1G12520	-0.0175149	6.49621e-09		AT3G58070	0.0469832	0.00834937		AT5G14210	-0.00435555	6.65263e-10		AT3G23880	-0.0102943	4.16015e-09
AT5G58250	-0.0115371	5.10017e-06		AT1G12845	0.025269	6.5892e-09		AT5G50420	-0.0234196	0.00834937		AT3G46370	-0.0101421	6.68094e-10		AT2G47870	0.0242598	4.3236e-09
AT4G12420	-0.0169416	5.19277e-06		AT3G22060	-0.0263587	6.5892e-09		AT3G55120	0.0266629	0.00852181		AT1G47960	0.00720446	7.19741e-10		AT5G66590	-0.008297	4.82764e-09
AT1G52400	0.0302487	5.29493e-06		AT1G65590	-0.0214069	6.70455e-09		AT3G51860	0.0873708	0.0085718		AT1G65960	-0.00313129	7.44905e-10		AT5G44130	-0.00968816	4.98001e-09
AT5G22460	0.0341989	5.3408e-06		AT1G12440	-0.0123799	7.09838e-09		AT4G27300	-0.028145	0.0085718		AT1G28960	0.00566409	7.62391e-10		AT3G27870	0.0079331	5.0317e-09
AT1G12090	-0.0082181	5.35131e-06		AT1G54160	0.0322029	7.29817e-09		AT5G14120	-0.0356588	0.0085718		AT1G78670	0.00451517	8.74808e-10		AT1G64110	0.037525	5.57458e-09
AT3G62030	-0.0104671	5.35131e-06		AT2G22980	-0.0274185	7.29817e-09		AT1G19770	-0.0381925	0.00877939		AT4G04340	-0.00396832	8.74808e-10		AT5G05890	-0.00921155	5.57458e-09
AT5G54600	-0.0116035	5.45961e-06		AT4G28040	0.0455099	7.29817e-09		AT1G20030	0.0403744	0.00877939		AT1G10060	-0.00838901	8.80968e-10		AT4G30460	0.0125095	5.71772e-09
AT3G13750	-0.015869	5.79889e-06		AT1G74940	-0.0216978	7.32277e-09		AT2G42610	-0.0322302	0.00877939		AT4G25050	-0.00445432	8.80968e-10		AT1G35190	0.00690527	5.8025e-09
AT4G22240	0.0090725	5.81956e-06		AT3G44970	0.0208043	7.784e-09		AT5G45820	-0.0217841	0.00893978		AT5G61520	0.00924264	9.20323e-10		AT2G01830	0.00655677	6.20073e-09
AT1G17940	0.018358	5.99312e-06		AT5G22460	0.0265706	7.784e-09		AT5G39030	-0.03237	0.00894197		AT1G56050	-0.00468214	9.30425e-10		AT3G61260	-0.00675268	6.34177e-09
AT4G29190	0.0175748	5.99781e-06		AT1G09350	-0.0277875	7.90919e-09		AT1G75780	-0.0439046	0.0090479		AT5G21930	-0.00495541	9.94111e-10		AT4G15490	0.00902381	6.62122e-09
AT2G12400	0.0185301	6.06558e-06		AT1G73680	0.0136996	8.5217e-09		AT5G53420	0.0356332	0.00928598		AT1G54100	0.00826198	1.03541e-09		AT5G16720	-0.0104329	6.87019e-09
AT4G29810	0.0133402	6.07463e-06		AT1G71020	-0.015206	9.61906e-09		AT5G16590	-0.0204286	0.00936405		AT1G65790	0.0144042	1.08128e-09		AT3G27090	-0.00461352	7.46472e-09
AT5G08050	-0.00934289	6.12013e-06		AT4G06534	0.0198109	9.61906e-09		AT1G63860	-0.0389935	0.00943107		AT3G48350	0.00845272	1.1238e-09		AT4G32570	-0.00648267	7.97402e-09
AT1G69490	0.0384642	6.14319e-06		AT5G40800	0.0687038	9.61906e-09		AT3G26320	-0.0542035	0.00945082		AT2G04100	0.00818123	1.16721e-09		AT1G61300	-0.00575447	8.15863e-09
AT1G62800	0.027127	6.15273e-06		AT3G28040	-0.0133123	9.74601e-09		AT5G62210	0.0405331	0.00948377		AT1G03080	0.00482153	1.22358e-09		AT5G52450	0.00757472	8.15863e-09
AT1G04480	-0.0154977	6.20081e-06		AT3G05690	0.0157287	9.80599e-09		AT5G15230	0.0234114	0.00953009		AT1G01470	0.00639164	1.26175e-09		AT1G02340	-0.0159433	9.00772e-09
AT5G08610	-0.0197862	6.30804e-06		AT3G52430	-0.0214225	9.89252e-09		AT3G10230	-0.0160578	0.00979209		AT3G17640	-0.00682892	1.29345e-09		AT3G57010	0.0102481	9.00772e-09
AT1G64790	-0.0119646	6.7677e-06		AT3G57010	0.032318	1.04038e-08		AT2G40750	-0.0590764	0.00983957		AT5G09870	-0.00503978	1.29673e-09		AT1G76890	-0.00933396	9.24483e-09
AT2G32990	0.0198134	6.7677e-06		AT1G70290	-0.0293471	1.05224e-08		AT4G39400	-0.0158666	0.0098435		AT5G67340	0.00974432	1.47146e-09		AT1G76080	-0.00590819	1.02711e-08
AT5G51820	-0.00818223	6.89147e-06		AT3G47380	-0.0328705	1.05224e-08		AT2G22810	-0.0540845	0.00994786		AT1G64170	0.00901273	1.52138e-09		AT1G64200	-0.00977612	1.07798e-08
AT1G69410	0.0130943	6.90629e-06		AT1G65190	-0.0170833	1.06664e-08						AT4G17460	-0.00897554	1.56007e-09		AT2G23770	-0.0183435	1.0982e-08
AT1G76960	0.0297674	6.95174e-06		AT5G18030	-0.021828	1.06664e-08						AT4G34860	0.0080913	1.56007e-09		AT3G50970	0.0177745	1.10694e-08
AT4G24770	-0.00799821	6.98694e-06		AT1G68190	-0.0254364	1.14903e-08						AT2G40610	-0.0149352	1.58235e-09		AT1G32900	0.00952901	1.12205e-08
AT3G56400	0.0303309	7.0047e-06		AT5G12140	0.0129409	1.20824e-08						AT4G19860	0.00458176	1.68059e-09		AT1G56650	0.019013	1.14296e-08
AT4G17560	-0.0103244	7.0047e-06		AT1G07280	-0.0121834	1.25114e-08						AT1G24145	0.0135274	1.82302e-09		AT3G44970	0.00981559	1.14296e-08
AT2G41680	-0.00785485	7.44191e-06		AT1G12240	-0.0147193	1.30098e-08						AT2G35060	0.00491812	1.83188e-09		AT5G13750	0.0114839	1.14296e-08
AT5G59310	0.0675045	7.58711e-06		AT1G73010	0.0328971	1.39406e-08						AT1G33811	-0.00740789	1.89185e-09		AT1G69410	0.00592809	1.15943e-08
AT5G51720	-0.0190337	7.71372e-06		AT3G03341	0.0726197	1.39406e-08						AT3G46450	0.00526269	1.9696e-09		AT2G37200	0.00825423	1.19722e-08
AT3G63190	-0.0100294	7.79049e-06		AT3G17070	0.0186903	1.39406e-08						AT4G34180	0.00581085	2.187e-09		AT3G27020	-0.00516029	1.21513e-08
AT5G64040	-0.00662123	7.81075e-06		AT5G37600	-0.0288311	1.39406e-08						AT2G25270	0.00627607	2.31177e-09		AT3G62010	-0.00516711	1.21513e-08
AT4G23600	0.0183456	8.01347e-06		AT2G17040	-0.055842	1.41256e-08						AT5G14700	0.0078566	2.48239e-09		AT3G01550	-0.00548857	1.22408e-08
AT5G53370	0.0143608	8.01347e-06		AT2G34850	0.038325	1.45427e-08						AT3G48690	0.00457376	2.55141e-09		AT1G60950	-0.00579164	1.37965e-08
AT1G16350	-0.0137905	8.03128e-06		AT1G26770	0.0214743	1.46485e-08						AT2G22190	0.00483943	2.63875e-09		AT3G56650	-0.0041067	1.43991e-08
AT1G24148	0.0192791	8.03128e-06		AT1G16300	0.0219305	1.53517e-08						AT1G80080	-0.00790204	2.6792e-09		AT2G41250	-0.008809	1.50443e-08
AT1G66725	0.0337944	8.03128e-06		AT1G22650	-0.0237188	1.60896e-08						AT5G19770	-0.00506583	2.72684e-09		AT3G14760	-0.0109367	1.51374e-08
AT1G74970	-0.0102694	8.03128e-06		AT3G06750	-0.0148005	1.63393e-08						AT1G07370	-0.00614664	2.79804e-09		AT2G34660	0.00546674	1.56008e-08
AT4G03030	0.0188477	8.03128e-06		AT1G52040	0.0498031	1.66697e-08						AT2G23980	0.00343334	2.79804e-09		AT4G08920	-0.00447811	1.60859e-08
AT3G58610	-0.010204	8.14585e-06		AT1G53470	0.0405328	1.81116e-08						AT3G44860	0.00839114	3.03983e-09		AT1G69870	0.00697331	1.62916e-08
AT3G06980	-0.0114551	8.16382e-06		AT3G13690	-0.0134344	1.83821e-08						AT4G38740	0.00395517	3.06533e-09		AT4G27310	-0.00500714	1.7104e-08
AT3G16420	0.0210896	8.58545e-06		AT1G17870	0.0241003	1.88104e-08						AT3G01480	-0.0033416	3.72957e-09		AT4G04620	0.00719108	1.74548e-08
AT1G74260	-0.0109235	8.59211e-06		AT5G03380	-0.0213718	2.03823e-08						AT5G40830	-0.00624204	3.74497e-09		AT3G08770	0.0072813	1.8167e-08
AT1G21250	0.031956	8.79971e-06		AT5G13710	-0.017187	2.14544e-08						AT5G65730	-0.0110365	3.76867e-09		AT5G49740	-0.00846873	1.8167e-08
AT5G18660	-0.0105747	8.90712e-06		AT1G51940	-0.0194241	2.15865e-08						AT3G48110	-0.00337426	3.99652e-09		AT3G16670	-0.0216726	1.8797e-08
AT4G16390	-0.014125	8.92002e-06		AT2G34010	-0.039448	2.15865e-08						AT4G23050	0.00457767	4.01749e-09		AT1G19740	-0.00531316	1.89193e-08
AT4G37640	0.016576	8.92002e-06		AT2G27402	-0.0236835	2.18214e-08						AT3G52340	0.00535554	4.08814e-09		AT5G38100	-0.0261087	1.89307e-08
AT3G05640	0.0185617	9.13325e-06		AT1G10020	-0.0224007	2.2612e-08						AT5G66400	0.00886461	4.2858e-09		AT1G53100	0.02353	1.90643e-08
AT2G30010	-0.0285161	9.3464e-06		AT4G39640	-0.0225846	2.31536e-08						AT5G66530	-0.00372376	4.73505e-09		AT3G12150	-0.0102097	1.92473e-08
AT4G20110	0.037058	9.3464e-06		AT1G72940	-0.0166319	2.3218e-08						AT2G04032	-0.0264521	5.04103e-09		AT1G07320	-0.00404362	1.99515e-08
AT1G69830	-0.00688161	9.75422e-06		AT1G48480	-0.0186576	2.37454e-08						AT2G47800	0.00759033	5.09245e-09		AT3G28040	-0.00596913	2.05256e-08
AT4G32150	0.0134059	9.8289e-06		AT3G30775	-0.0387307	2.41405e-08						AT1G70820	-0.00456758	5.39728e-09		AT2G18160	-0.00477256	2.39622e-08
AT4G02510	-0.00857717	9.99039e-06		AT1G58602	-0.0117898	2.47279e-08						AT3G49210	0.0109359	5.57448e-09		AT4G00970	-0.0191798	2.46285e-08
AT3G07390	-0.00963481	1.0349e-05		AT4G16760	0.0123377	2.52035e-08						AT1G71910	0.0163875	5.64047e-09		AT3G57400	-0.00611909	2.60178e-08
AT2G37710	0.0155721	1.10382e-05		AT1G63420	0.0208672	2.53885e-08						AT1G25530	0.00762278	5.7712e-09		AT1G55920	-0.00623299	2.61409e-08
AT3G09830	0.0248639	1.10382e-05		AT2G30930	-0.0280503	2.55039e-08						AT5G42300	0.00429164	5.87607e-09		AT1G59700	0.00595814	2.68879e-08
AT3G54470	-0.0175971	1.10382e-05		AT4G16190	0.011488	2.56743e-08						AT4G00400	-0.00563135	5.9554e-09		AT2G46710	-0.00545485	2.86418e-08
AT1G70160	0.0113629	1.12663e-05		AT1G04830	0.0140982	2.57141e-08						AT1G07430	0.0189318	6.0187e-09		AT5G17460	0.0121019	2.90883e-08
AT2G25510	0.0224217	1.12663e-05		AT1G67050	-0.0170733	2.84402e-08						AT1G75500	-0.00613584	6.07851e-09		AT1G13990	0.00969356	2.92629e-08
AT1G76090	-0.0309538	1.14889e-05		AT5G10760	-0.0833386	3.00066e-08						AT3G20440	-0.00714284	6.07851e-09		AT3G54460	-0.00590832	2.92629e-08
AT5G44130	-0.013254	1.14889e-05		AT5G07990	0.0539647	3.02816e-08						AT4G19120	-0.00553033	6.47822e-09		AT4G23400	-0.0104644	3.19712e-08
AT4G13770	0.00868907	1.17672e-05		AT2G41560	-0.0161965	3.03301e-08						AT5G02890	-0.00593492	6.49264e-09		AT5G53500	-0.00582746	3.25755e-08
AT2G40900	0.0234388	1.18025e-05		AT1G68520	-0.0154122	3.14373e-08						AT4G37080	-0.00422986	6.95152e-09		AT3G18980	-0.00623909	3.2686e-08
AT5G10240	-0.0194849	1.19083e-05		AT1G78450	-0.0249966	3.23475e-08						AT5G65990	0.00440784	7.06255e-09		AT1G16720	-0.00691843	3.4838e-08
AT5G41700	0.011218	1.2011e-05		AT1G03220	-0.0170706	3.26074e-08						AT1G30755	0.00747556	7.11063e-09		AT2G35620	-0.00516621	3.4838e-08
AT3G49220	0.00839602	1.23927e-05		AT1G07430	0.0759054	3.33282e-08						AT2G28940	0.00709157	7.11063e-09		AT4G38560	0.033359	3.59601e-08
AT3G14930	-0.00807682	1.2407e-05		AT5G66460	0.0207217	3.563e-08						AT3G57400	-0.00466713	7.11063e-09		AT5G40850	-0.00612914	3.59601e-08
AT5G02870	-0.0147078	1.24725e-05		AT2G26530	-0.0355164	3.60441e-08						AT4G15620	-0.0071108	7.33396e-09		AT5G15190	0.0129963	3.60942e-08
AT2G17120	0.0241009	1.25333e-05		AT2G15042	-0.0366212	3.63897e-08						AT5G63030	0.00564558	7.33396e-09		AT5G53490	-0.00477022	3.72325e-08
AT4G24450	0.0171629	1.26546e-05		AT4G39955	0.0263648	3.86283e-08						AT4G34230	0.00712353	7.6764e-09		AT2G32160	-0.0136742	3.76688e-08
AT3G55800	-0.00542542	1.31131e-05		AT5G16590	-0.0130449	3.90439e-08						AT3G27210	0.00859608	7.75001e-09		AT2G30570	-0.00431103	3.88226e-08
AT1G68590	-0.010246	1.34752e-05		AT5G19770	-0.014526	3.90439e-08						AT5G20960	0.00782366	7.78493e-09		AT3G22200	0.00664733	3.88226e-08
AT4G11840	0.0220814	1.38643e-05		AT5G53970	0.0150538	3.9757e-08						AT3G57520	0.00707674	7.84036e-09		AT1G55320	0.00765167	4.0161e-08
AT1G73390	0.0112488	1.39117e-05		AT1G75750	-0.0238974	4.1928e-08						AT4G02825	-0.0129842	8.44291e-09		AT5G52810	0.00897305	4.02805e-08
AT5G09620	0.0137603	1.39561e-05		AT1G60800	-0.00862349	4.19645e-08						AT5G55730	-0.00574883	8.58287e-09		AT5G18080	-0.0137374	4.14543e-08
AT3G26520	-0.0140456	1.5303e-05		AT4G16880	-0.0128211	4.28143e-08						AT4G01120	0.00604172	8.79557e-09		AT1G63360	-0.00543214	4.58133e-08
AT3G16640	0.00778594	1.57283e-05		AT1G25530	0.0231086	4.49609e-08						AT4G14440	0.00733665	9.10998e-09		AT1G33240	-0.00551015	4.7361e-08
AT5G03350	0.0280814	1.58198e-05		AT2G27050	-0.0138518	4.80435e-08						AT1G13750	0.00758136	9.92962e-09		AT1G49500	-0.013218	4.89589e-08
AT2G21970	0.0126542	1.6047e-05		AT3G26030	-0.0129768	4.81709e-08						AT1G03090	0.00510539	1.04355e-08		AT5G54585	-0.0111963	5.14642e-08
AT3G16780	-0.0213704	1.60558e-05		AT1G66940	-0.0226511	4.88287e-08						AT1G15690	-0.00367597	1.04692e-08		AT1G60800	-0.00408892	5.15517e-08
AT4G28240	0.0172668	1.60558e-05		AT4G23400	-0.0246956	4.88287e-08						AT1G47510	0.0130343	1.08418e-08		AT1G09210	-0.00536562	5.15613e-08
AT1G76570	0.013403	1.61499e-05		AT5G03210	0.0637405	5.01573e-08						AT5G18830	0.00400519	1.15647e-08		AT5G65640	0.00653976	5.42709e-08
AT1G13930	0.0105645	1.63949e-05		AT2G44500	-0.0341894	5.11564e-08						AT4G01720	0.010553	1.21548e-08		AT1G14440	0.00616126	5.65116e-08
AT5G08330	-0.0103497	1.64778e-05		AT5G62100	0.0164002	5.22819e-08						AT1G18710	0.00775909	1.26027e-08		AT1G29430	-0.00891316	6.15813e-08
AT5G05960	0.0258505	1.6895e-05		AT1G09530	0.0186785	5.25292e-08						AT5G55280	-0.00349733	1.28409e-08		AT5G10080	0.00886542	6.15813e-08
AT2G32160	0.0180443	1.69265e-05		AT3G16360	0.0418356	5.58796e-08						AT1G01600	-0.0146136	1.31923e-08		AT5G58670	-0.00885681	6.15813e-08
AT5G40950	-0.0083948	1.7128e-05		AT2G38540	0.0209898	5.6256e-08						AT1G65450	-0.0275772	1.32278e-08		AT5G50130	0.00906877	6.36466e-08
AT3G25860	-0.0118496	1.71388e-05		AT1G26800	-0.0345248	5.64125e-08						AT2G22660	0.00465355	1.45919e-08		AT3G22060	-0.0106387	6.50191e-08
AT3G44890	-0.0123012	1.71388e-05		AT3G46820	-0.0171066	5.95689e-08						AT5G48540	0.0108857	1.4613e-08		AT5G24030	0.00790116	6.58844e-08
AT2G03890	0.0106765	1.73918e-05		AT5G25280	-0.0170235	5.98544e-08						AT1G75460	-0.00276658	1.47167e-08		AT4G39970	-0.00460137	7.04845e-08
AT2G37660	-0.00972852	1.74288e-05		AT1G17940	0.0292209	5.99984e-08						AT4G30610	-0.00820052	1.51629e-08		AT3G19450	-0.005961	7.26163e-08
AT4G09500	0.0167018	1.74288e-05		AT1G30500	0.0178848	5.99984e-08						AT1G19770	-0.00614004	1.57801e-08		AT2G40270	-0.0055781	7.2702e-08
AT1G14790	0.0184103	1.76077e-05		AT3G28180	-0.0148075	6.21885e-08						AT3G06880	-0.00499746	1.60815e-08		AT4G05070	-0.0120982	7.30467e-08
AT1G78370	0.0107149	1.76077e-05		AT4G01100	0.00956346	6.4662e-08						AT1G66880	0.0067459	1.66503e-08		AT4G01610	0.00545889	7.56336e-08
AT3G18130	-0.0205113	1.80999e-05		AT1G53280	0.0107845	6.54644e-08						AT3G18780	-0.00334528	1.69186e-08		AT1G19180	0.0148728	7.70934e-08
AT2G35040	-0.0122304	1.81546e-05		AT3G06080	-0.0172549	6.54644e-08						AT2G43020	0.00412933	1.70584e-08		AT1G50630	0.00855014	8.2411e-08
AT4G22880	0.0650922	1.81546e-05		AT4G17550	0.0169922	6.77399e-08						AT1G65845	0.0113759	1.75767e-08		AT2G14080	-0.00552112	8.41821e-08
AT5G46830	0.0194578	1.81546e-05		AT1G35580	-0.0138507	6.77454e-08						AT1G25560	0.00691415	1.87051e-08		AT4G25080	-0.00385216	8.41821e-08
AT3G21200	-0.0141131	1.86201e-05		AT4G31040	-0.0118344	7.09787e-08						AT5G44680	-0.00710434	1.93196e-08		AT1G64230	0.00416848	8.97892e-08
AT5G27450	-0.020332	1.89547e-05		AT5G60800	-0.0331694	7.18385e-08						AT5G60360	0.00331229	1.96844e-08		AT3G14360	0.0132917	9.04888e-08
AT1G58440	-0.0131675	1.97328e-05		AT5G47880	0.0149565	7.28776e-08						AT5G57390	0.00798283	1.97731e-08		AT5G03380	-0.00831642	9.04888e-08
AT4G22590	0.0195776	2.02526e-05		AT2G27920	-0.0229639	7.36735e-08						AT4G32920	0.00543587	1.98994e-08		AT5G10250	-0.0134087	9.1737e-08
AT1G62710	0.0157439	2.03204e-05		AT4G39800	0.0154762	7.58667e-08						AT3G55130	0.0063339	2.03467e-08		AT1G05805	-0.00845617	9.24731e-08
AT4G23170	0.019689	2.04688e-05		AT1G75500	-0.0157185	7.70617e-08						AT4G08470	0.00545716	2.18813e-08		AT3G13120	-0.00324156	9.43562e-08
AT4G09730	-0.0132833	2.12684e-05		AT1G49450	0.0262303	7.85139e-08						AT2G38120	-0.00650844	2.28468e-08		AT5G08000	0.00696448	9.63331e-08
AT5G62720	-0.0100747	2.12684e-05		AT2G20770	0.0184125	7.94696e-08						AT4G29740	-0.0154012	2.32345e-08		AT3G06483	-0.00437843	9.68362e-08
AT2G36830	-0.0131979	2.17476e-05		AT5G49990	0.01486	7.94696e-08						AT2G46870	-0.00621818	2.33245e-08		AT1G73680	0.0056042	1.03573e-07
AT3G18390	-0.00996374	2.17476e-05		AT2G33590	0.0154584	8.59246e-08						AT5G48830	-0.00449563	2.33245e-08		AT3G46630	-0.00604578	1.10248e-07
AT1G32080	-0.0064261	2.19823e-05		AT5G14800	0.0146069	8.61611e-08						AT4G29190	0.0052812	2.35112e-08		AT3G20250	0.00633894	1.10315e-07
AT5G09650	-0.0103524	2.19823e-05		AT4G23600	0.0256024	8.6185e-08						AT4G23320	0.0176986	2.46533e-08		AT1G35580	-0.00649673	1.12049e-07
AT2G21620	0.0139783	2.20802e-05		AT5G21170	-0.0198586	9.11504e-08						AT5G11420	-0.00503018	2.56459e-08		AT3G22231	-0.022393	1.1535e-07
AT5G43760	-0.0113307	2.30446e-05		AT1G76890	-0.018962	1.01949e-07						AT5G58670	-0.0062351	2.58622e-08		AT1G19450	-0.00401933	1.16411e-07
AT4G05320	0.00572419	2.37437e-05		AT3G57260	-0.103742	1.03267e-07						AT1G79970	0.00402564	2.62026e-08		AT2G15620	-0.00740797	1.16411e-07
AT1G49600	-0.015759	2.41629e-05		AT4G04830	0.0169748	1.06224e-07						AT5G13370	0.00560214	2.69201e-08		AT1G68520	-0.00822147	1.18561e-07
AT1G24580	0.0285023	2.43219e-05		AT1G11840	0.0104801	1.06732e-07						AT1G58270	0.00806011	2.8389e-08		AT3G17820	0.00537894	1.19017e-07
AT4G33080	0.0110293	2.44803e-05		AT3G05640	0.0450277	1.07284e-07						AT1G21310	0.0092531	2.97519e-08		AT5G57490	-0.00464129	1.20073e-07
AT5G40370	0.0109263	2.45696e-05		AT1G23030	-0.0206677	1.13758e-07						AT2G40490	-0.00354084	3.03515e-08		AT1G30520	-0.00619413	1.21023e-07
AT2G14560	0.0385754	2.4866e-05		AT1G20840	-0.0152195	1.14547e-07						AT1G65190	-0.00453004	3.04233e-08		AT3G28270	0.018739	1.23586e-07
AT1G34420	0.0366085	2.48977e-05		AT5G59080	-0.0274786	1.1504e-07						AT3G08375	0.0173192	3.04501e-08		AT5G08030	0.00752605	1.24993e-07
AT1G70890	0.0137367	2.4899e-05		AT1G78610	0.0146373	1.23176e-07						AT3G18830	0.00770965	3.08633e-08		AT5G44060	-0.00888172	1.24993e-07
AT1G62660	0.0155906	2.50471e-05		AT3G08770	0.0245703	1.2427e-07						AT5G15970	0.00812695	3.08633e-08		AT3G58570	0.00609106	1.36112e-07
AT3G12110	-0.0239299	2.50823e-05		AT2G22810	-0.0423853	1.27461e-07						AT1G63710	-0.0281544	3.09108e-08		AT5G35790	-0.00530622	1.3633e-07
AT4G16720	-0.0135434	2.52218e-05		AT5G62210	0.0319916	1.27692e-07						AT3G52150	-0.00305848	3.11403e-08		AT2G28900	0.00754359	1.40638e-07
AT3G11170	-0.00656976	2.53203e-05		AT3G14360	0.0379279	1.28346e-07						AT4G18910	0.00870295	3.13545e-08		AT2G21130	0.00901357	1.46272e-07
AT3G14595	0.0139204	2.57326e-05		AT5G67190	-0.0222593	1.35141e-07						AT5G45670	-0.00576038	3.15282e-08		AT1G68840	-0.00973614	1.52043e-07
AT1G57590	0.0221777	2.58526e-05		AT4G08920	-0.010014	1.36459e-07						AT3G18000	0.00470554	3.18062e-08		AT1G78970	-0.0102487	1.52439e-07
AT5G22290	0.0211706	2.58526e-05		AT2G43570	-0.0475676	1.39183e-07						AT1G17745	0.00725386	3.34381e-08		AT3G56980	-0.020272	1.52439e-07
AT4G30825	-0.0137693	2.66285e-05		AT5G17520	0.0122655	1.41732e-07						AT4G32190	-0.00430465	3.35714e-08		AT5G59430	-0.00551862	1.55205e-07
AT4G26370	-0.0126776	2.68633e-05		AT5G12050	-0.0280314	1.46246e-07						AT4G27600	-0.0035132	3.40053e-08		AT3G52360	-0.00907349	1.63541e-07
AT1G35710	0.0333115	2.70673e-05		AT1G16260	-0.0170219	1.48489e-07						AT3G23570	0.00454596	3.56384e-08		AT5G48180	0.00514682	1.67195e-07
AT1G20010	-0.012158	2.88488e-05		AT1G60190	0.0544294	1.48653e-07						AT2G46400	0.00985278	3.65197e-08		AT3G06070	-0.0104203	1.67577e-07
AT4G17300	-0.00953841	2.90109e-05		AT2G03530	-0.0229246	1.60306e-07						AT5G64260	0.00639738	3.65355e-08		AT4G21570	0.0056159	1.701e-07
AT3G19710	0.0147195	2.92345e-05		AT5G40790	0.0972308	1.61856e-07						AT4G34630	0.0041757	3.74138e-08		AT3G06145	-0.00949106	1.82597e-07
AT1G52855	0.0361863	3.06037e-05		AT5G19190	-0.0137279	1.71201e-07						AT2G43570	0.0213182	3.91678e-08		AT1G68590	-0.00343326	1.826e-07
AT3G10520	-0.0108684	3.06037e-05		AT2G23770	-0.0408974	1.76207e-07						AT1G08450	0.00516586	4.00558e-08		AT2G29670	-0.00611114	2.02547e-07
AT3G47420	0.0176319	3.06037e-05		AT4G21570	0.0125762	1.77539e-07						AT1G11600	-0.0145281	4.05037e-08		AT5G62360	-0.0245787	2.06108e-07
AT2G33590	0.0127787	3.0789e-05		AT4G22820	0.0180669	1.77539e-07						AT3G17810	0.00507139	4.06445e-08		AT4G36010	0.00923809	2.10491e-07
AT5G12470	-0.00789237	3.0789e-05		AT5G44568	-0.0600153	1.78605e-07						AT1G17840	0.00520042	4.20313e-08		AT4G34650	0.00859286	2.14319e-07
AT4G27410	0.0280778	3.10291e-05		AT4G10500	-0.0579209	1.84113e-07						AT5G25220	0.00475311	4.20977e-08		AT5G12050	-0.0134774	2.16274e-07
AT5G02760	-0.0415207	3.10291e-05		AT5G54710	-0.0387949	1.93432e-07						AT2G29170	-0.00623006	4.24793e-08		AT1G20020	-0.00386479	2.18323e-07
AT1G67865	0.0147826	3.10454e-05		AT5G45670	-0.014361	2.02527e-07						AT3G52380	-0.00306958	4.30439e-08		AT5G47040	-0.00737533	2.19519e-07
AT5G37300	0.0309837	3.31438e-05		AT2G39770	-0.00856961	2.03295e-07						AT4G10500	0.0114625	4.32424e-08		AT2G27050	-0.00497926	2.27963e-07
AT2G39210	0.021263	3.34298e-05		AT3G58070	0.0355352	2.04455e-07						AT4G30460	0.0113641	4.37786e-08		AT3G54890	-0.00570221	2.41566e-07
AT5G11110	0.024145	3.35489e-05		AT2G32400	-0.0136404	2.10856e-07						AT3G15030	-0.00392657	4.43301e-08		AT2G34010	-0.0132639	2.45701e-07
AT3G04790	-0.00744176	3.44289e-05		AT3G23880	-0.0198326	2.15845e-07						AT4G16390	-0.0048769	4.43412e-08		AT2G41380	0.0156119	2.45701e-07
AT4G04840	-0.0214776	3.56017e-05		AT1G75040	-0.0634724	2.17392e-07						AT5G52760	0.014635	4.59404e-08		AT1G01420	-0.0066842	2.7264e-07
AT1G68710	0.0144191	3.64271e-05		AT2G32080	-0.0137757	2.31408e-07						AT1G55680	0.00275813	4.61609e-08		AT4G17870	-0.0066334	2.78383e-07
AT2G04240	0.0154225	3.64271e-05		AT5G43700	-0.0123933	2.31408e-07						AT5G66460	0.0057052	4.67675e-08		AT1G29450	-0.00808549	2.7863e-07
AT4G19530	-0.0100791	3.66393e-05		AT5G45820	-0.0140876	2.35685e-07						AT2G46420	0.00443381	4.6896e-08		AT5G53970	0.00601674	2.79305e-07
AT5G50720	0.0310175	3.69917e-05		AT2G31800	-0.0155475	2.39064e-07						AT1G78210	0.00433382	4.899e-08		AT1G05385	-0.00597827	2.8413e-07
AT5G45510	0.0148161	3.70255e-05		AT2G21300	0.0110475	2.45604e-07						AT3G21700	0.00614363	4.899e-08		AT5G13100	-0.00477262	2.89304e-07
AT2G14720	0.0114624	3.72292e-05		AT1G77210	-0.025975	2.48699e-07						AT3G57680	0.00563691	4.93405e-08		AT3G60380	-0.0052147	3.03741e-07
AT1G12500	-0.0122047	3.76984e-05		AT3G44100	0.0118707	2.51534e-07						AT3G10080	-0.0054786	5.00756e-08		AT4G19390	0.00853277	3.04877e-07
AT4G00400	-0.0109477	3.97403e-05		AT5G06690	-0.0333051	2.53462e-07						AT4G38730	0.00646002	5.00756e-08		AT1G80920	-0.0074106	3.05079e-07
AT1G48480	-0.0142434	4.10008e-05		AT1G27200	0.0147002	2.59533e-07						AT1G54575	0.0113996	5.1245e-08		AT1G01520	0.00941932	3.12659e-07
AT3G59970	-0.00627654	4.12288e-05		AT3G12610	-0.0157869	2.61515e-07						AT3G56240	0.00516452	5.15416e-08		AT5G65870	0.0136485	3.15006e-07
AT4G14960	-0.00626102	4.13393e-05		AT4G36040	-0.0157148	2.72584e-07						AT5G36220	0.00884142	5.15416e-08		AT5G48930	-0.00415732	3.26616e-07
AT4G04020	0.0134524	4.39244e-05		AT4G36210	0.00966117	2.88058e-07						AT1G23480	-0.00926371	5.2244e-08		AT5G47810	0.00875841	3.34124e-07
AT5G21090	0.00891484	4.39244e-05		AT5G03190	0.0189753	2.88058e-07						AT1G29470	-0.00442787	5.3813e-08		AT4G38690	-0.00664276	3.34455e-07
AT2G28950	-0.0142192	4.42709e-05		AT1G78850	0.0205868	2.91417e-07						AT1G63420	0.00529629	5.50836e-08		AT5G16570	-0.0102493	3.36198e-07
AT1G62560	0.0130711	4.56408e-05		AT1G69870	0.0163745	2.9298e-07						AT4G38420	-0.00759207	5.50836e-08		AT3G11660	-0.00810407	3.45325e-07
AT5G02500	0.0059279	4.59489e-05		AT5G19440	0.0112119	2.9298e-07						AT1G74690	-0.00385364	5.58296e-08		AT1G55690	0.00508765	3.5562e-07
AT1G78670	0.0142838	4.65466e-05		AT3G15540	-0.0345969	2.95498e-07						AT1G76990	-0.0048948	5.5848e-08		AT5G03040	-0.00488234	3.64858e-07
AT4G14400	0.026346	4.66981e-05		AT4G20320	0.0244649	2.95498e-07						AT1G79520	0.0075078	5.5848e-08		AT2G03750	-0.00424757	3.65934e-07
AT1G19660	0.0137149	4.86638e-05		AT3G62110	-0.0176266	2.97966e-07						AT1G16850	0.0124907	5.60709e-08		AT1G32160	-0.00379788	3.80834e-07
AT2G43630	-0.0119882	4.89277e-05		AT1G76960	0.0264886	3.00342e-07						AT4G18440	-0.00400063	5.88725e-08		AT1G67300	0.00742091	3.84276e-07
AT4G29740	-0.0314791	4.96369e-05		AT1G13110	-0.0195311	3.03543e-07						AT1G13990	0.00617774	6.19325e-08		AT3G07310	-0.00484942	3.84276e-07
AT5G03940	-0.00896451	4.96369e-05		AT2G25690	0.0169969	3.15814e-07						AT1G62540	0.0139019	6.36384e-08		AT5G24420	-0.00695865	3.84276e-07
AT5G46290	-0.00902243	4.97962e-05		AT1G70370	-0.00945201	3.20261e-07						AT4G19520	0.00468389	6.36384e-08		AT1G06830	-0.0198973	3.87209e-07
AT2G41430	0.00970247	5.05826e-05		AT2G40270	-0.0141262	3.2636e-07						AT1G14345	-0.00390987	6.46952e-08		AT5G08640	0.00657554	3.95886e-07
AT1G74850	-0.00907598	5.06295e-05		AT4G04040	-0.0141214	3.33769e-07						AT5G61820	0.0066613	6.55976e-08		AT1G64080	0.00822415	3.96707e-07
AT5G52760	0.0516716	5.14118e-05		AT1G58270	0.0207453	3.36105e-07						AT3G49120	0.00857341	6.70244e-08		AT5G12950	-0.005037	3.97835e-07
AT1G62750	-0.0067107	5.36746e-05		AT2G22990	-0.0179373	3.37573e-07						AT5G23860	-0.0058437	6.73702e-08		AT5G62280	-0.022175	4.20646e-07
AT2G38140	-0.0103619	5.40196e-05		AT4G24350	-0.0182859	3.47841e-07						AT3G53180	0.00397624	6.79629e-08		AT1G11850	-0.008959	4.25504e-07
AT3G14440	0.0209237	5.44242e-05		AT5G47560	0.0110494	3.55041e-07						AT4G30960	0.00415847	6.8042e-08		AT1G24070	0.0188803	4.27184e-07
AT1G69200	-0.0191419	5.47389e-05		AT3G50910	0.0129474	3.63123e-07						AT4G36540	-0.00503574	6.84588e-08		AT4G19710	-0.00468584	4.40357e-07
AT5G16715	-0.0090017	5.50719e-05		AT5G04930	-0.0104544	3.71293e-07						AT3G08860	0.00772813	6.87375e-08		AT3G22780	-0.00384074	4.4228e-07
AT1G77450	0.0375355	5.53244e-05		AT5G62360	-0.0570613	3.77339e-07						AT1G09970	0.00479902	6.92522e-08		AT5G43470	-0.00538167	4.42792e-07
AT1G04430	-0.0073433	5.54366e-05		AT1G14700	-0.00989615	3.80604e-07						AT4G22690	-0.00412927	6.92522e-08		AT3G46440	0.00598396	4.45533e-07
AT1G08650	0.0151527	5.60449e-05		AT1G66150	-0.0110708	3.88418e-07						AT5G45930	-0.00425811	6.92522e-08		AT2G25080	-0.00400892	4.50624e-07
AT2G25520	0.011547	5.62233e-05		AT2G29290	-0.0149668	3.93717e-07						AT4G30160	-0.00378995	6.95914e-08		AT3G47340	0.00709942	4.57593e-07
AT5G65220	-0.0094994	5.68511e-05		AT3G09600	0.0155237	4.19538e-07						AT2G38870	0.00639674	7.07945e-08		AT3G16850	-0.00464433	4.62022e-07
AT3G15780	0.0204071	5.68968e-05		AT5G06370	0.0143446	4.19538e-07						AT2G46440	0.00769714	7.07945e-08		AT5G39050	0.00944226	4.77809e-07
AT4G01610	0.0185202	5.68968e-05		AT5G14430	-0.00938905	4.2117e-07						AT3G24480	-0.00562206	7.09691e-08		AT5G47370	-0.00627426	4.81032e-07
AT3G11420	0.0144519	5.74968e-05		AT1G72930	-0.0243522	4.26146e-07						AT1G30900	0.00957083	7.34065e-08		AT5G45650	-0.00579772	4.92479e-07
AT1G11210	0.0304551	5.87175e-05		AT3G14067	0.00944984	4.61881e-07						AT5G55960	-0.00479489	7.57179e-08		AT4G30400	-0.0060894	5.04868e-07
AT5G16590	-0.0149664	5.87175e-05		AT4G20840	-0.0157801	4.74308e-07						AT5G05170	-0.00384166	7.61272e-08		AT3G28290	0.0266399	5.05892e-07
AT2G16280	-0.0111098	5.97535e-05		AT5G61790	-0.0145292	4.80487e-07						AT3G05140	-0.0176055	7.75815e-08		AT4G17340	-0.00936264	5.14719e-07
AT5G15860	0.0267435	5.97535e-05		AT4G17470	0.0382838	4.86356e-07						AT4G35300	0.00386751	7.86115e-08		AT3G23700	-0.00435828	5.29423e-07
AT3G16940	0.0116188	5.99557e-05		AT5G57050	0.0214848	4.92429e-07						AT1G10470	-0.0037042	8.22589e-08		AT1G18900	0.00490185	5.35572e-07
AT5G20720	-0.0106474	6.05037e-05		AT4G27410	0.0272913	4.97953e-07						AT2G30140	0.00502764	8.2262e-08		AT3G15850	-0.00378709	5.41761e-07
AT5G35360	-0.0103978	6.08667e-05		AT1G21410	0.0181145	5.09053e-07						AT4G09730	-0.00452968	8.2262e-08		AT1G73750	-0.006725	5.49759e-07
AT4G19390	0.0257037	6.1561e-05		AT3G09580	-0.0152812	5.15851e-07						AT2G39400	0.00760074	8.23379e-08		AT4G36760	0.00475566	5.68061e-07
AT1G56660	0.0257198	6.17702e-05		AT2G29310	-0.0129852	5.16761e-07						AT3G14760	-0.0130873	8.43822e-08		AT2G16990	0.00796979	5.83219e-07
AT1G58360	0.0111644	6.45689e-05		AT5G48590	-0.0106158	5.34967e-07						AT2G30010	-0.0154554	8.45112e-08		AT5G27410	0.00524766	5.89389e-07
AT1G80820	0.0363162	6.4702e-05		AT4G18970	-0.0147677	5.46161e-07						AT2G39350	0.00742345	8.46721e-08		AT3G26780	-0.00513703	5.89811e-07
AT5G35220	-0.00994055	6.48878e-05		AT1G65900	0.0143304	5.47006e-07						AT4G02790	-0.00347922	8.60157e-08		AT3G23910	0.00530851	5.96786e-07
AT4G25740	-0.0122684	6.52325e-05		AT4G34650	0.0196069	5.5267e-07						AT4G27430	-0.00440917	8.60892e-08		AT5G67420	-0.00880783	5.98847e-07
AT4G38420	-0.0227369	6.54334e-05		AT5G43150	0.0166823	5.62173e-07						AT1G74290	0.00934061	8.61121e-08		AT1G10060	-0.00741253	6.08556e-07
AT5G63030	0.0156273	6.56077e-05		AT1G47510	0.0314107	5.62766e-07						AT2G38530	0.0199227	8.77993e-08		AT1G16260	-0.00639203	6.09544e-07
AT3G47500	0.00794959	6.60732e-05		AT5G15190	0.0276558	5.62972e-07						AT4G23290	-0.00360268	8.88867e-08		AT5G21222	-0.00516739	6.09544e-07
AT4G28780	-0.0171308	6.60732e-05		AT2G03090	0.016551	5.63561e-07						AT4G27860	0.00699028	9.50374e-08		AT3G10230	-0.0058995	6.11012e-07
AT4G17600	-0.00642749	6.70308e-05		AT5G57340	-0.0215005	5.75892e-07						AT3G54390	0.00718784	9.55403e-08		AT3G22680	0.00728098	6.25569e-07
AT3G50930	0.0294574	6.7847e-05		AT5G66650	0.0333852	5.7658e-07						AT3G59710	-0.0253924	9.55403e-08		AT4G05020	0.0112402	6.31467e-07
AT5G59670	0.0287272	7.06287e-05		AT5G59220	0.083416	5.87015e-07						AT4G39180	0.00610131	9.63231e-08		AT2G36320	-0.00645178	6.34064e-07
AT3G18080	-0.0117467	7.20618e-05		AT2G16430	-0.00907355	6.46561e-07						AT1G12500	-0.00634828	9.77743e-08		AT1G10960	-0.00567375	6.48023e-07
AT1G03400	0.0180276	7.26384e-05		AT5G06870	-0.0175231	6.68925e-07						AT1G74070	-0.00368349	9.77743e-08		AT2G34510	-0.00634279	6.6245e-07
AT1G65980	0.00847454	7.27422e-05		AT3G26320	-0.0388326	6.89764e-07						AT3G19480	-0.00453751	9.77743e-08		AT4G38420	-0.00863803	6.82479e-07
AT2G29300	0.0188943	7.39374e-05		AT1G60960	0.0266417	6.89769e-07						AT5G37540	0.00957111	9.77743e-08		AT5G25120	-0.00573844	6.89972e-07
AT1G09310	0.00756662	7.45268e-05		AT4G17810	-0.01762	6.92772e-07						AT1G77370	0.00485755	1.00638e-07		AT3G46450	0.00535318	6.9729e-07
AT1G52000	0.0224527	7.58044e-05		AT4G27560	0.0165199	7.01786e-07						AT1G67920	0.0174085	1.04316e-07		AT3G16000	-0.00440475	6.9909e-07
AT3G53890	-0.0156261	7.65335e-05		AT4G32280	-0.041926	7.01932e-07						AT3G23940	-0.00559875	1.05474e-07		AT3G02110	-0.00606904	7.00431e-07
AT3G15210	0.0172063	7.78748e-05		AT1G02390	0.0361044	7.13008e-07						AT5G58110	0.00418937	1.05474e-07		AT3G55610	0.00492968	7.23169e-07
AT1G11430	-0.00913061	7.88154e-05		AT1G72430	-0.0250283	7.21971e-07						AT3G11080	0.0105209	1.06608e-07		AT1G75750	-0.00691725	7.38876e-07
AT1G22530	-0.0329247	7.88154e-05		AT3G52340	0.0139005	7.32078e-07						AT1G14880	0.0301335	1.10092e-07		AT3G25660	-0.00283835	8.27964e-07
AT1G68560	-0.00910191	7.88154e-05		AT5G59320	0.0957356	7.39033e-07						AT1G02305	0.0034272	1.15907e-07		AT1G17170	0.0227934	8.46434e-07
AT5G57040	0.00771283	7.97206e-05		AT3G03990	-0.0133238	7.47504e-07						AT1G50180	0.00847716	1.18479e-07		AT3G19400	-0.00718538	8.63511e-07
AT2G22990	-0.00939601	8.02352e-05		AT2G39570	-0.015496	7.67e-07						AT1G11820	-0.00367074	1.18683e-07		AT1G04980	-0.0105022	8.81359e-07
AT3G15730	0.00765165	8.02352e-05		AT1G33590	-0.0197699	7.6954e-07						AT3G22440	0.00354069	1.18945e-07		AT3G62600	-0.00553216	8.83143e-07
AT5G44070	0.014638	8.02352e-05		AT1G60710	0.00974327	7.71457e-07						AT1G24147	0.00640279	1.22972e-07		AT2G36400	0.0069158	8.9266e-07
AT5G60680	0.0141517	8.05639e-05		AT1G18740	-0.0146514	7.72881e-07						AT5G27600	0.00623197	1.22972e-07		AT1G12500	-0.00765437	9.34863e-07
AT1G08520	-0.0064521	8.1217e-05		AT4G30490	0.0124862	7.75139e-07						AT4G37470	0.00481814	1.23863e-07		AT1G30620	0.00714276	9.47978e-07
AT1G75350	-0.00924693	8.28886e-05		AT4G30470	0.0214386	7.90041e-07						AT4G25670	0.00391296	1.24427e-07		AT2G17500	0.0178924	1.01616e-06
AT5G43780	0.0152906	8.34715e-05		AT1G66100	-0.0242218	7.97649e-07						AT4G33050	0.00642673	1.24427e-07		AT1G72770	0.00551996	1.02424e-06
AT1G18710	0.0205553	8.4819e-05		AT2G29090	0.0205996	8.31923e-07						AT5G13240	-0.00588326	1.24427e-07		AT4G39770	-0.0087947	1.05022e-06
AT4G37470	0.0112461	8.48259e-05		AT5G39320	-0.0137999	8.3432e-07						AT2G40830	0.00331055	1.27043e-07		AT5G66580	-0.00776116	1.07019e-06
AT1G65860	0.0117546	8.52641e-05		AT5G64850	-0.0138608	8.39404e-07						AT5G17710	-0.00380409	1.27515e-07		AT5G18020	-0.00897123	1.07402e-06
AT1G78630	-0.00914387	8.52641e-05		AT4G34050	0.0147665	8.89087e-07						AT4G34710	0.00446684	1.31624e-07		AT5G35170	-0.00463343	1.16186e-06
AT3G61770	-0.0153369	8.52641e-05		AT5G52120	-0.0255919	9.47368e-07						AT1G12570	-0.0157137	1.35089e-07		AT4G11600	0.00532482	1.16878e-06
AT4G39940	0.0103195	8.60637e-05		AT5G16980	0.0202854	9.59228e-07						AT3G25020	0.00696491	1.36274e-07		AT3G15356	-0.0149151	1.19711e-06
AT4G16490	0.00869144	8.62155e-05		AT5G09730	-0.0355523	9.67652e-07						AT2G28400	0.0144751	1.41777e-07		AT5G50160	0.00514352	1.21295e-06
AT1G77510	0.0179638	8.69211e-05		AT1G20490	0.0212724	9.7232e-07						AT5G10930	0.00547157	1.42487e-07		AT2G42900	-0.0131687	1.25995e-06
AT3G10160	-0.00973258	8.94955e-05		AT3G11420	0.0220826	9.73423e-07						AT5G55220	-0.00346457	1.42648e-07		AT1G66230	-0.0120723	1.31678e-06
AT5G25560	0.00862745	8.99423e-05		AT2G38310	-0.0312616	9.81232e-07						AT4G23310	0.0164356	1.42781e-07		AT3G54820	0.00728928	1.38925e-06
AT1G03870	-0.019152	9.02307e-05		AT2G38120	-0.0146974	9.9871e-07						AT1G66920	0.0125729	1.43372e-07		AT1G22690	-0.00762964	1.40371e-06
AT2G31350	0.0183572	9.02782e-05		AT2G02070	-0.0105247	1.03215e-06						AT5G58620	0.00604685	1.45901e-07		AT2G31110	-0.0123673	1.45791e-06
AT2G43030	-0.00985327	9.04771e-05		AT1G78240	-0.0121796	1.0374e-06						AT1G44760	0.00496676	1.48468e-07		AT4G02330	0.01079	1.46365e-06
AT1G34430	-0.0103624	9.11201e-05		AT2G16990	0.0175696	1.05142e-06						AT2G03240	0.00554512	1.5267e-07		AT5G06690	-0.010967	1.466e-06
AT1G70090	-0.0223438	9.11201e-05		AT3G57540	0.0234811	1.05142e-06						AT2G43030	-0.0026673	1.5267e-07		AT1G03495	0.00788972	1.479e-06
AT3G58120	-0.0310441	9.23128e-05		AT5G24760	0.0118543	1.08516e-06						AT4G21570	0.00467143	1.53659e-07		AT2G32400	-0.0058684	1.479e-06
AT1G52230	-0.00608319	9.25201e-05		AT1G72880	-0.0142335	1.09193e-06						AT5G38510	-0.0039843	1.54448e-07		AT5G13370	0.00651325	1.47989e-06
AT1G56460	0.0129742	9.3656e-05		AT3G57400	-0.0124435	1.09193e-06						AT3G18370	0.00374422	1.61775e-07		AT1G74850	-0.00348231	1.47999e-06
AT5G07460	0.0114484	9.3656e-05		AT1G19740	-0.0119743	1.0941e-06						AT1G55110	0.00414226	1.62294e-07		AT2G28500	0.015236	1.47999e-06
AT3G27850	-0.00759979	9.41979e-05		AT4G15490	0.0196723	1.0941e-06						AT2G33380	0.0172323	1.63622e-07		AT1G30270	0.00579231	1.48079e-06
AT1G21060	-0.0217848	9.45887e-05		AT5G15960	0.0956276	1.12463e-06						AT1G17550	0.00392539	1.63812e-07		AT1G08540	-0.00529808	1.48342e-06
AT3G18600	-0.0249405	9.55964e-05		AT2G30540	0.0252409	1.12841e-06						AT1G77740	-0.00362205	1.67049e-07		AT3G25690	-0.00471441	1.48807e-06
AT1G12110	-0.0129508	9.70772e-05		AT3G24460	0.0246587	1.12841e-06						AT2G32560	-0.00372797	1.70017e-07		AT2G04160	0.00689666	1.52968e-06
AT1G76160	-0.0116772	9.70995e-05		AT5G47550	0.0235836	1.12841e-06						AT3G45860	0.00938288	1.70017e-07		AT5G07990	0.0186115	1.55192e-06
AT2G28940	0.0217161	9.70995e-05		AT1G45191	0.0145674	1.21755e-06						AT2G22810	-0.0193813	1.70614e-07		AT4G23130	-0.0297326	1.56345e-06
AT1G01520	0.0317855	9.74887e-05		AT4G24960	0.015998	1.22767e-06						AT3G17950	0.00556443	1.7394e-07		AT1G03870	-0.0107271	1.59218e-06
AT1G48520	-0.00864952	9.76249e-05		AT4G15210	0.0407791	1.2495e-06						AT3G08720	0.00772477	1.74578e-07		AT3G19553	-0.00518087	1.59218e-06
AT4G17550	0.013208	9.76249e-05		AT2G31110	-0.0312647	1.25856e-06						AT4G29610	-0.0204827	1.79538e-07		AT5G32450	-0.00538822	1.61487e-06
AT1G23205	-0.0269113	9.7979e-05		AT4G11290	-0.0341227	1.26217e-06						AT1G55490	-0.00341575	1.80359e-07		AT2G03090	0.00639531	1.62315e-06
AT3G08870	0.0256091	9.80763e-05		AT1G67900	-0.0118315	1.2995e-06						AT1G51140	0.00602255	1.83409e-07		AT4G12720	0.00691547	1.64831e-06
AT1G29050	0.0221269	9.8756e-05		AT5G50720	0.0237024	1.30253e-06						AT2G02390	0.00671007	1.83923e-07		AT1G19770	-0.00690067	1.67257e-06
AT4G23220	0.0362232	0.000101026		AT1G16390	-0.0284572	1.30408e-06						AT3G55430	0.00430963	1.87578e-07		AT5G08400	0.00693772	1.68414e-06
AT3G08740	-0.0101365	0.000101111		AT4G25280	0.0156875	1.34136e-06						AT3G01810	-0.00401743	1.91184e-07		AT4G20840	-0.00732375	1.72908e-06
AT3G16080	-0.0160476	0.000101119		AT1G69530	-0.0118747	1.35498e-06						AT2G16750	-0.00986758	1.93519e-07		AT5G02120	-0.00576783	1.72908e-06
AT3G45620	0.020214	0.000103024		AT5G14640	0.0130412	1.37027e-06						AT3G28100	0.00642003	1.93519e-07		AT1G17220	-0.0045075	1.74385e-06
AT2G16500	-0.0098982	0.000103563		AT2G26710	-0.0272782	1.3852e-06						AT3G60300	0.00481045	2.02163e-07		AT5G65380	0.00520001	1.75861e-06
AT1G67870	0.0121393	0.000106179		AT5G16030	-0.0178829	1.3854e-06						AT1G59620	0.00483876	2.04376e-07		AT2G44870	-0.00384345	1.77653e-06
AT1G20490	0.0231163	0.000106704		AT2G41475	0.0132663	1.43225e-06						AT2G28000	-0.004087	2.08259e-07		AT4G12830	-0.00574095	1.79334e-06
AT5G60390	-0.00955618	0.000107247		AT5G27600	0.0156073	1.5007e-06						AT2G15480	0.00964363	2.10022e-07		AT3G13690	-0.00566516	1.79712e-06
AT1G28960	0.0164378	0.000107868		AT3G54880	-0.0188564	1.54991e-06						AT4G05180	-0.00220437	2.19193e-07		AT5G18200	0.00650821	1.8078e-06
AT3G04260	-0.0112309	0.000107868		AT1G22530	-0.0292246	1.57218e-06						AT3G09830	0.00740583	2.2067e-07		AT3G19480	-0.00559482	1.82374e-06
AT3G24430	-0.00692926	0.000107868		AT5G44680	-0.0167939	1.59315e-06						AT3G15536	0.0141517	2.22918e-07		AT4G04750	0.00570588	1.82374e-06
AT2G27402	-0.0239471	0.000108048		AT1G27290	-0.0170119	1.6464e-06						AT5G09620	0.00461002	2.24178e-07		AT4G22820	0.0057726	1.83493e-06
AT1G48630	-0.0208836	0.000111855		AT1G19350	-0.0129779	1.64866e-06						AT2G31840	-0.00412455	2.24738e-07		AT3G26320	-0.0145872	1.90227e-06
AT2G42380	-0.0195772	0.000112836		AT5G59750	-0.0158916	1.65394e-06						AT3G22550	0.00565697	2.24738e-07		AT5G52120	-0.0105661	1.94885e-06
AT3G52380	-0.00864407	0.000112836		AT1G05805	-0.0204708	1.66356e-06						AT4G02280	0.00966648	2.24782e-07		AT5G25280	-0.00689536	1.97246e-06
AT4G38160	-0.0138617	0.000112836		AT2G30440	-0.0121424	1.68137e-06						AT5G65280	0.00812162	2.25064e-07		AT5G18030	-0.00789514	2.09366e-06
AT3G16400	0.0175375	0.000114207		AT5G65730	-0.048281	1.69012e-06						AT2G24050	-0.00395395	2.28998e-07		AT2G19450	0.00994198	2.10473e-06
AT3G18890	-0.00600648	0.000115024		AT4G11521	-0.0589043	1.72655e-06						AT4G08980	0.00369018	2.30246e-07		AT5G11110	0.00880273	2.12051e-06
AT2G22810	-0.0244681	0.000116055		AT1G48100	0.0250058	1.75553e-06						AT4G20940	-0.00630127	2.33834e-07		AT1G27850	-0.00435536	2.13451e-06
AT4G37080	-0.0133605	0.000116055		AT5G10730	0.0131083	1.77834e-06						AT1G72880	-0.00455669	2.39194e-07		AT4G08980	0.0049044	2.18768e-06
AT1G07040	0.0175047	0.00011615		AT4G13830	-0.0120483	1.79835e-06						AT5G22640	-0.0038113	2.41827e-07		AT5G14660	-0.00432438	2.19686e-06
AT1G20440	0.0167762	0.000116311		AT2G16720	0.0249806	1.8036e-06						AT4G10770	-0.00381736	2.46412e-07		AT2G39770	-0.0045219	2.21718e-06
AT2G24420	0.00784733	0.000116311		AT3G20910	0.0164697	1.86573e-06						AT2G16720	0.0089203	2.48544e-07		AT2G40750	-0.0141566	2.25296e-06
AT1G62780	-0.0104037	0.000116804		AT3G45860	-0.0387543	1.97617e-06						AT5G19780	-0.00493362	2.54121e-07		AT5G67385	-0.00461322	2.2856e-06
AT4G30600	0.0092	0.000116804		AT1G18330	-0.0204988	1.97928e-06						AT1G70070	-0.00360963	2.56156e-07		AT1G80110	0.0108528	2.30721e-06
AT3G13920	-0.0081929	0.00011838		AT2G42790	0.0132658	1.99985e-06						AT3G48500	-0.00334269	2.56156e-07		AT4G10770	-0.00510147	2.33156e-06
AT3G48560	-0.00501202	0.00011838		AT1G72910	-0.0304813	2.03495e-06						AT1G33170	-0.00407714	2.59292e-07		AT4G32280	-0.0223785	2.36323e-06
AT1G17550	0.0119359	0.000118647		AT1G80820	0.0254897	2.06674e-06						AT1G27150	0.00420485	2.67926e-07		AT1G77490	-0.00523839	2.36632e-06
AT1G64370	0.0105972	0.000119207		AT3G14310	-0.0162621	2.06674e-06						AT5G15190	0.0101986	2.7777e-07		AT4G25000	-0.0276204	2.39018e-06
AT1G55680	0.00834835	0.000119283		AT2G43150	-0.0212172	2.08398e-06						AT2G31170	-0.00372167	2.7909e-07		AT4G29520	-0.00741234	2.42124e-06
AT3G59040	-0.0144734	0.00012103		AT3G14840	-0.0153929	2.09187e-06						AT4G28240	0.00678493	2.7909e-07		AT4G25570	-0.00500396	2.44998e-06
AT1G48350	-0.00935116	0.000123049		AT5G11590	0.0212279	2.09187e-06						AT4G36210	0.00371389	2.81645e-07		AT3G17330	-0.00604022	2.4695e-06
AT5G41460	0.0168535	0.000124713		AT2G05440	0.0217512	2.10789e-06						AT4G31805	-0.0163924	2.83267e-07		AT1G77920	0.00811647	2.57272e-06
AT2G24060	-0.0106173	0.000127609		AT3G16940	0.0109394	2.10789e-06						AT2G25530	0.00722387	2.85606e-07		AT5G41790	-0.00496036	2.57647e-06
AT2G37270	-0.0148993	0.000127609		AT1G65930	-0.0118434	2.1609e-06						AT5G42800	0.00932541	2.97247e-07		AT5G48590	-0.00365348	2.58902e-06
AT3G14770	-0.0193086	0.000128219		AT5G53500	-0.011756	2.17808e-06						AT2G43510	0.0174028	2.98762e-07		AT2G34430	-0.00697682	2.60257e-06
AT1G70370	-0.00962585	0.000131275		AT3G13062	-0.012306	2.21105e-06						AT2G41190	0.0132887	3.0991e-07		AT3G14620	0.0081425	2.72274e-06
AT1G31180	-0.0102199	0.000134671		AT1G78440	0.0261696	2.2876e-06						AT5G47640	0.00656732	3.0991e-07		AT5G40800	0.0155615	2.74482e-06
AT2G33210	-0.0133937	0.000135574		AT3G54680	0.0190835	2.35919e-06						AT5G28770	-0.010298	3.12928e-07		AT1G73830	-0.0147573	2.79378e-06
AT1G23310	0.00630396	0.000135959		AT2G42540	0.0367571	2.52202e-06						AT4G32330	-0.00338292	3.38828e-07		AT1G31690	0.00558658	2.96985e-06
AT3G46970	-0.00889776	0.000139775		AT1G01720	0.023658	2.52368e-06						AT2G14880	-0.00308879	3.5594e-07		AT3G13980	-0.00718527	3.00345e-06
AT4G23180	0.0145351	0.000139842		AT4G04570	-0.0399697	2.64099e-06						AT2G26900	-0.00308048	3.56883e-07		AT1G54780	-0.00470504	3.1925e-06
AT1G12800	-0.00529363	0.000140578		AT5G39030	-0.0209837	2.64666e-06						AT2G36990	-0.00249306	3.56883e-07		AT2G03820	0.00310503	3.1925e-06
AT1G78490	0.0167207	0.000140578		AT2G30490	0.0124322	2.65645e-06						AT5G24420	-0.00752887	3.56883e-07		AT1G14430	-0.0110027	3.19555e-06
AT4G26070	0.0179506	0.000140578		AT4G30180	0.0318724	2.71301e-06						AT1G31690	-0.0221117	3.6081e-07		AT1G62540	0.00916833	3.20923e-06
AT4G33680	-0.0105773	0.000140578		AT4G31820	-0.0133063	2.72908e-06						AT1G22590	-0.00570267	3.61983e-07		AT2G47710	0.00342492	3.20923e-06
AT5G14910	-0.0083332	0.000140578		AT5G13370	0.0139036	2.79205e-06						AT3G60415	0.00708598	3.6453e-07		AT2G33330	-0.00541878	3.24269e-06
AT2G39460	-0.0134181	0.000140909		AT3G54690	-0.0131087	2.87621e-06						AT3G13310	0.00562826	3.70994e-07		AT3G52150	-0.00342022	3.27662e-06
AT5G57800	-0.0108118	0.000140946		AT2G39250	0.0118205	2.94493e-06						AT3G12930	-0.00369088	3.71007e-07		AT3G04140	-0.00465456	3.39257e-06
AT1G73330	0.0636437	0.00014139		AT3G09390	0.0211536	3.01202e-06						AT2G18300	-0.00564839	3.79134e-07		AT2G34680	-0.00472749	3.39441e-06
AT3G58730	0.00697603	0.000141801		AT1G33700	0.020142	3.02389e-06						AT2G21385	-0.00292764	3.79134e-07		AT5G10150	-0.00755276	3.41778e-06
AT1G48430	0.0152233	0.0001424		AT1G22590	-0.0118436	3.05811e-06						AT1G27200	0.00493989	3.82939e-07		AT3G04240	0.00339659	3.45523e-06
AT3G55940	0.0277369	0.000142509		AT5G10410	0.0219515	3.20818e-06						AT1G69295	0.00447081	3.82939e-07		AT3G14990	0.0105027	3.47334e-06
AT4G22010	-0.0194977	0.000142951		AT4G23630	0.0108581	3.27783e-06						AT3G27830	-0.00251697	3.85292e-07		AT4G02380	0.0141143	3.61106e-06
AT3G26170	0.02163	0.000144426		AT5G66580	-0.0203811	3.37483e-06						AT2G25830	-0.004183	3.87648e-07		AT2G06025	-0.00523451	3.65485e-06
AT2G35680	0.0120912	0.000144798		AT3G52360	-0.0180225	3.5277e-06						AT1G78850	0.00749558	3.91478e-07		AT5G61590	-0.0108082	3.76134e-06
AT5G54390	0.00913013	0.000146329		AT1G08550	-0.0136325	3.54715e-06						AT2G34640	-0.00346383	3.94659e-07		AT4G30650	0.00698955	3.77904e-06
AT1G24070	0.0310217	0.000147498		AT3G18000	0.0154275	3.55459e-06						AT3G14590	0.00811501	4.04318e-07		AT1G78290	-0.00786767	3.87401e-06
AT1G80410	-0.0107946	0.000147498		AT1G24020	0.0174964	3.56647e-06						AT5G03200	0.00548086	4.04823e-07		AT3G61630	0.0068182	3.91268e-06
AT5G18040	0.0239489	0.000148164		AT3G48690	0.0123025	3.83414e-06						AT1G69490	0.0113143	4.19876e-07		AT2G38860	0.00630516	4.01688e-06
AT3G18740	-0.0137665	0.000148373		AT2G35840	0.00912533	3.86846e-06						AT3G09580	-0.00587573	4.23046e-07		AT1G21130	-0.00592765	4.03185e-06
AT3G12930	-0.0117349	0.000149397		AT5G61810	0.0143729	3.90341e-06						AT4G23150	0.0134008	4.25596e-07		AT3G51000	0.00456941	4.05388e-06
AT1G60490	0.0122228	0.00015279		AT4G20260	-0.0176002	3.95086e-06						AT5G08280	-0.0036346	4.26075e-07		AT4G21750	-0.00415211	4.30625e-06
AT1G73680	0.0132756	0.00015279		AT4G24020	-0.00861784	3.96922e-06						AT1G12460	-0.0070835	4.35061e-07		AT2G45170	-0.0111844	4.32451e-06
AT1G34750	0.0219075	0.00015424		AT1G71340	0.0140811	4.04608e-06						AT2G14560	0.0172055	4.45458e-07		AT1G21400	0.0098059	4.40339e-06
AT3G54210	-0.0083591	0.000155243		AT5G24210	-0.0189724	4.04608e-06						AT5G03040	-0.00331032	4.63667e-07		AT3G06080	-0.00559657	4.51682e-06
AT1G79630	0.0197758	0.000156035		AT1G09750	-0.016326	4.05833e-06						AT3G57630	0.00468523	4.76243e-07		AT1G68470	0.00822997	4.60983e-06
AT5G13200	0.0196737	0.000156035		AT5G47610	0.0183739	4.05833e-06						AT1G58080	-0.00282207	4.85756e-07		AT1G74690	-0.00320885	4.63725e-06
AT5G14660	-0.00949633	0.000156035		AT5G48880	0.0098353	4.1766e-06						AT3G16000	-0.00252661	4.90461e-07		AT2G39400	-0.0104785	4.63725e-06
AT5G55280	-0.0096354	0.000156035		AT4G31290	0.0137592	4.23896e-06						AT4G39710	-0.00322571	5.13366e-07		AT5G09300	-0.0144081	4.74384e-06
AT2G45470	-0.0148858	0.00015641		AT4G35750	-0.0136812	4.27072e-06						AT1G75170	0.00854712	5.14381e-07		AT4G21280	-0.00500143	4.85125e-06
AT4G27600	-0.00725674	0.000157879		AT3G56590	-0.0109063	4.38004e-06						AT3G50240	-0.00447113	5.28156e-07		AT5G57900	0.00519903	4.90312e-06
AT3G28460	-0.0130533	0.000160965		AT1G04570	0.0234897	4.39694e-06						AT1G05850	-0.00427276	5.32176e-07		AT2G01420	-0.00427133	5.18344e-06
AT1G43170	-0.0121716	0.000161122		AT5G28020	-0.012648	4.66863e-06						AT5G61810	0.0038811	5.32312e-07		AT5G57660	-0.00651068	5.2615e-06
AT3G28860	-0.00850942	0.000161235		AT4G21750	-0.00889765	4.67458e-06						AT4G38950	-0.0044074	5.52224e-07		AT2G36950	-0.00656896	5.27332e-06
AT3G48110	-0.008401	0.000161235		AT2G35060	0.0179042	4.77729e-06						AT2G14260	0.00294713	5.61158e-07		AT5G12850	-0.00396122	5.36862e-06
AT2G40830	0.00999872	0.000169012		AT3G14720	0.0139228	4.84795e-06						AT4G33000	-0.00446512	5.66998e-07		AT3G05690	0.00500171	5.51155e-06
AT1G74920	0.00747727	0.000169759		AT5G07770	-0.0206092	5.01762e-06						AT1G77920	0.00565301	5.8336e-07		AT1G53280	0.00472288	5.64935e-06
AT1G23190	0.00774755	0.000170563		AT4G22740	0.0105863	5.15118e-06						AT5G44020	-0.0129926	5.86126e-07		AT3G21250	0.00648437	5.80244e-06
AT3G49120	0.0166489	0.000170563		AT4G29610	-0.036675	5.15214e-06						AT5G01590	-0.0027851	5.97454e-07		AT1G51080	-0.00601879	5.86333e-06
AT1G04830	0.0166263	0.000170675		AT2G22200	0.0166195	5.19063e-06						AT5G12250	-0.00332058	5.98098e-07		AT2G44490	-0.00457609	5.86333e-06
AT1G23030	-0.0219817	0.000178625		AT4G13180	0.0245821	5.35322e-06						AT2G30500	0.00468484	6.09149e-07		AT3G23805	-0.00705913	5.89751e-06
AT3G44670	0.00932468	0.000179849		AT4G39770	-0.015425	5.51715e-06						AT1G07040	0.00559607	6.15931e-07		AT5G67330	0.00375141	5.98935e-06
AT3G07430	-0.0115524	0.000180613		AT4G26080	0.0150948	5.61161e-06						AT3G51430	0.00806317	6.18492e-07		AT3G07010	-0.00859784	6.0311e-06
AT5G65700	-0.00995084	0.000181598		AT5G06510	0.0203241	5.63171e-06						AT2G17220	0.00373895	6.24933e-07		AT3G26180	-0.00683044	6.13271e-06
AT5G04130	-0.0116159	0.000183528		AT1G08230	0.0130681	5.7164e-06						AT1G59740	0.00612397	6.25043e-07		AT1G33260	0.00862293	6.18931e-06
AT1G56110	-0.0177282	0.000184234		AT4G27430	-0.00941218	5.8896e-06						AT4G23140	0.0173034	6.3372e-07		AT5G35490	-0.00960456	6.2109e-06
AT3G50470	0.0477484	0.000185341		AT2G37240	0.0124304	6.14383e-06						AT5G64740	-0.00357397	6.44333e-07		AT1G73920	-0.00591821	6.27438e-06
AT5G01810	-0.0167644	0.000186602		AT1G04530	-0.0166273	6.2444e-06						AT1G64950	0.00384525	6.53791e-07		AT4G01310	-0.00356369	6.40875e-06
AT4G19210	-0.00802965	0.000194391		AT5G52940	-0.0389536	6.32639e-06						AT4G38660	-0.00587093	6.56012e-07		AT1G19670	-0.00535384	6.67502e-06
AT3G01470	0.0118323	0.000198524		AT5G10570	-0.0435698	6.69439e-06						AT4G33540	0.00474549	6.56445e-07		AT3G58070	0.0118665	6.67502e-06
AT2G33580	0.0300911	0.000199343		AT4G01060	0.0290991	6.71605e-06						AT4G39940	0.00407868	6.56634e-07		AT5G63800	-0.00420075	6.71948e-06
AT3G49010	-0.0135147	0.000199943		AT4G33300	-0.0125278	6.76351e-06						AT1G11300	0.00680184	6.57332e-07		AT2G37480	-0.00584058	6.73778e-06
AT2G33370	-0.0152183	0.000200775		AT3G15356	-0.0332257	6.77709e-06						AT4G00480	-0.00839363	6.68171e-07		AT3G01440	-0.00555847	6.73778e-06
AT2G04350	0.0109138	0.000201984		AT5G18650	-0.0166687	6.77709e-06						AT4G19230	0.00892777	6.71153e-07		AT1G15820	-0.00589225	6.77372e-06
AT5G59850	-0.0157052	0.000204425		AT5G09300	-0.0264443	6.80166e-06						AT1G08230	0.00522928	6.78825e-07		AT2G44230	-0.00527935	6.78717e-06
AT1G80380	-0.00697997	0.000206028		AT5G24030	0.0174144	6.8616e-06						AT3G22060	0.00517612	6.79117e-07		AT4G40030	0.00317453	6.81653e-06
AT4G02890	0.00658879	0.000206028		AT5G67385	-0.0114728	6.8616e-06						AT1G20020	-0.00342418	7.17902e-07		AT4G32030	-0.00468953	7.17201e-06
AT2G38800	0.00862208	0.0002075		AT1G70820	-0.019371	6.96743e-06						AT4G23470	0.0037745	7.47425e-07		AT1G78600	-0.00440646	7.74323e-06
AT3G09200	-0.010946	0.0002075		AT3G03170	0.0367371	6.98701e-06						AT1G12330	-0.00477638	7.60803e-07		AT3G06760	0.00471813	7.74323e-06
AT3G21540	-0.0239894	0.0002075		AT4G32060	-0.00907881	7.10261e-06						AT1G17220	-0.00343036	7.63417e-07		AT1G55740	0.00956051	7.79478e-06
AT3G47520	-0.00999609	0.000208482		AT3G24480	-0.0155069	7.34915e-06						AT5G54630	-0.00466834	7.70621e-07		AT3G23030	-0.00430364	7.79478e-06
AT3G52960	-0.00727043	0.000209441		AT4G23990	0.0136774	7.36875e-06						AT1G04430	-0.00394338	7.76997e-07		AT3G20300	0.00561365	7.87295e-06
AT3G61420	0.0112803	0.000209441		AT5G09620	0.0122846	7.38393e-06						AT3G11010	0.0131269	8.18479e-07		AT5G44680	-0.00474447	7.90125e-06
AT1G08190	0.00696162	0.000210728		AT5G19875	0.0206173	7.38408e-06						AT2G18890	-0.00687926	8.26232e-07		AT4G19520	0.0062415	7.90243e-06
AT5G12860	-0.00759316	0.000214248		AT5G23050	0.01393	7.44841e-06						AT5G57150	0.0049053	8.32134e-07		AT4G21910	0.00628318	7.91379e-06
AT1G30500	0.0215863	0.000216787		AT5G27410	0.0119515	7.48476e-06						AT1G75750	-0.00860422	8.39146e-07		AT1G22650	-0.00796163	7.98707e-06
AT5G55480	-0.0138833	0.000217096		AT2G36895	0.00813977	7.53982e-06						AT1G74440	0.00914719	8.543e-07		AT4G03110	-0.00521487	8.22697e-06
AT5G64170	0.00831374	0.000217096		AT3G17790	0.014101	7.67516e-06						AT3G57010	0.00924566	8.60032e-07		AT1G11260	-0.00694874	8.23992e-06
AT2G04780	-0.0138432	0.000219831		AT1G06360	0.0129042	7.91587e-06						AT2G25870	-0.00340537	8.71311e-07		AT3G22370	0.0060983	8.23992e-06
AT5G63570	-0.00851079	0.000219831		AT5G10480	0.0102161	7.92898e-06						AT3G16565	0.00916583	8.71311e-07		AT1G75690	-0.00495082	8.38382e-06
AT2G24020	-0.00849024	0.000220622		AT3G06510	0.00795323	8.18764e-06						AT5G52900	-0.00633804	8.84264e-07		AT5G38980	-0.00348868	8.45237e-06
AT5G63180	-0.0144432	0.000220815		AT4G09500	0.0167707	8.48219e-06						AT4G28040	0.0114882	8.95686e-07		AT4G00400	-0.00590429	8.4593e-06
AT1G07080	0.00730063	0.00022243		AT2G29140	0.011303	8.57705e-06						AT5G63130	0.0116632	9.03585e-07		AT4G00750	-0.0059784	8.64316e-06
AT5G12840	0.0125394	0.000222691		AT1G65800	-0.0133826	9.0451e-06						AT2G10940	-0.00676132	9.08388e-07		AT1G11170	0.0122445	8.94818e-06
AT2G26570	0.0083907	0.000223055		AT2G47670	0.0307696	9.11457e-06						AT4G03820	0.00603837	9.09277e-07		AT3G48730	-0.00501668	8.98342e-06
AT1G12770	-0.0107287	0.000229866		AT5G36910	-0.0244952	9.25349e-06						AT5G11110	0.007858	9.09277e-07		AT5G49190	0.0122832	8.98342e-06
AT2G26910	-0.00694623	0.000230699		AT1G01250	0.0327649	9.27214e-06						AT1G18650	-0.00427772	9.11036e-07		AT3G63110	-0.00936545	9.19913e-06
AT2G41090	0.0136815	0.000230699		AT3G14770	-0.0196472	9.34805e-06						AT4G30110	-0.00505401	9.11036e-07		AT4G09020	0.00632795	9.23051e-06
AT2G04030	-0.00998845	0.0002313		AT1G15310	0.0231817	9.40339e-06						AT5G39950	0.00404065	9.11036e-07		AT2G36750	0.0180415	9.47833e-06
AT3G57180	-0.0134046	0.0002313		AT1G19770	-0.0200108	9.51541e-06						AT5G57910	0.00809866	9.19304e-07		AT1G68710	0.00609479	9.65431e-06
AT2G36620	-0.0156856	0.000231568		AT3G54830	-0.0187548	9.51541e-06						AT1G65590	-0.0062204	9.24853e-07		AT5G60490	-0.0157991	9.71332e-06
AT5G57350	0.00880645	0.000232037		AT5G40170	-0.0140374	9.51777e-06						AT5G64040	-0.00309464	9.49507e-07		AT1G73110	-0.00459664	9.7413e-06
AT5G52810	0.0207014	0.000232907		AT5G02260	0.0164027	9.60198e-06						AT3G50970	0.01271	9.74837e-07		AT2G43010	-0.00488465	9.7413e-06
AT5G17170	-0.0102457	0.000234228		AT3G47080	0.0143936	9.95201e-06						AT2G45570	0.0151755	1.00154e-06		AT4G24960	0.00568713	9.7413e-06
AT5G17220	0.0423834	0.000234561		AT2G28500	0.0423481	1.0047e-05						AT5G14740	-0.00349117	1.0018e-06		AT1G31420	-0.00413822	9.96411e-06
AT1G47710	0.0111655	0.000234634		AT4G37970	0.0253953	1.00589e-05						AT5G22000	0.00288981	1.00753e-06		AT2G26695	-0.00583478	9.96436e-06
AT1G74470	-0.00505832	0.000237668		AT5G52780	-0.016266	1.00967e-05						AT2G24850	0.0216783	1.01381e-06		AT5G67190	-0.0103361	9.96436e-06
AT2G28400	0.0312224	0.000239788		AT2G45600	0.0172212	1.12825e-05						AT5G01220	-0.0043057	1.01516e-06		AT4G31860	0.00693836	1.00022e-05
AT2G46690	0.017394	0.000240214		AT1G59590	-0.0499329	1.12837e-05						AT5G39320	-0.00633397	1.02369e-06		AT3G46900	-0.0170738	1.00209e-05
AT1G56070	-0.00837514	0.000241276		AT1G11210	0.0303347	1.13839e-05						AT3G61630	0.00537488	1.03829e-06		AT3G24480	-0.00648989	1.00885e-05
AT3G27160	-0.0102455	0.000241366		AT2G40750	-0.0411929	1.15321e-05						AT5G47610	0.00582878	1.06397e-06		AT4G39795	-0.0201029	1.02535e-05
AT1G66410	0.0076436	0.000241796		AT1G52720	0.0178059	1.15751e-05						AT1G59700	0.00368597	1.08582e-06		AT5G45350	0.00578233	1.02535e-05
AT5G07470	0.0112099	0.00024246		AT3G52840	-0.0102392	1.15751e-05						AT3G25660	-0.00351958	1.09199e-06		AT2G05160	-0.010115	1.0747e-05
AT1G77370	0.0143663	0.000243285		AT1G70890	-0.0150199	1.18665e-05						AT4G19390	0.00728022	1.10764e-06		AT1G24580	0.0108456	1.07655e-05
AT3G22740	0.0218101	0.000244961		AT3G48080	-0.0710764	1.2039e-05						AT1G64230	0.00408879	1.16803e-06		AT1G28010	-0.0107772	1.08832e-05
AT3G23120	0.0313173	0.00024705		AT5G62090	0.0122465	1.20589e-05						AT3G16940	0.00423692	1.21316e-06		AT2G30600	-0.00840089	1.08832e-05
AT3G17390	-0.0105171	0.000247348		AT1G21130	-0.0162948	1.21939e-05						AT2G29120	0.00620494	1.21347e-06		AT1G73180	0.0043194	1.09806e-05
AT3G57010	0.0342267	0.000249601		AT1G33720	-0.0139434	1.21939e-05						AT1G30410	0.00480595	1.21397e-06		AT3G18390	-0.00382051	1.10053e-05
AT4G31210	-0.0170072	0.000250096		AT1G64200	-0.0150959	1.21939e-05						AT1G76180	0.00544645	1.21397e-06		AT2G39130	0.00463316	1.1108e-05
AT4G26130	0.00782501	0.000250116		AT5G12950	-0.0123311	1.21939e-05						AT2G44300	0.00611729	1.22522e-06		AT2G25900	-0.00878196	1.1489e-05
AT4G38950	-0.0152732	0.000251899		AT5G41740	-0.021003	1.21939e-05						AT2G45600	0.00561381	1.22522e-06		AT2G30010	-0.0101545	1.1642e-05
AT1G68890	-0.00833216	0.000251905		AT1G20560	0.00960988	1.25876e-05						AT3G55710	-0.0087616	1.22522e-06		AT3G63060	0.0109752	1.17796e-05
AT1G08540	-0.005945	0.000253794		AT1G15125	-0.0547456	1.2596e-05						AT4G21930	0.0149637	1.22522e-06		AT5G52550	-0.00589741	1.18207e-05
AT1G62390	-0.00797699	0.000253794		AT5G67390	-0.0143746	1.2684e-05						AT3G48080	0.0125889	1.24443e-06		AT2G42220	-0.00381412	1.18476e-05
AT3G04240	0.00848024	0.000253794		AT4G31050	-0.0222582	1.28981e-05						AT3G45620	0.0040801	1.2536e-06		AT5G42620	-0.00446088	1.20361e-05
AT1G72970	-0.0201942	0.00025545		AT1G32870	0.0132912	1.29258e-05						AT4G20110	0.0086962	1.27171e-06		AT1G62810	0.00537648	1.24238e-05
AT1G73040	0.0427657	0.000256339		AT2G29500	0.0267166	1.29699e-05						AT5G66590	-0.00624163	1.28183e-06		AT5G51570	0.00624119	1.30913e-05
AT4G34180	0.014086	0.000256339		AT4G00750	-0.0112604	1.29699e-05						AT1G01520	0.00917167	1.28472e-06		AT5G22860	0.00641227	1.33004e-05
AT5G05460	0.0255234	0.000256339		AT4G01330	-0.0132759	1.3475e-05						AT4G13180	0.00867013	1.28499e-06		AT4G28300	0.00377783	1.38835e-05
AT5G21920	-0.0125395	0.000256339		AT1G34580	0.0219872	1.3538e-05						AT3G08030	0.00284748	1.34305e-06		AT4G34180	0.00382845	1.39255e-05
AT5G40480	-0.0109096	0.000256339		AT1G69040	-0.0118351	1.37708e-05						AT3G03150	0.00379093	1.34427e-06		AT2G43610	0.0133052	1.39413e-05
AT4G00810	-0.0107909	0.00026129		AT5G47640	0.0164902	1.37708e-05						AT2G38470	0.00734503	1.34498e-06		AT5G07580	-0.00802583	1.39424e-05
AT3G46740	-0.0120799	0.000262901		AT1G52342	-0.0188438	1.38121e-05						AT1G58030	0.0032658	1.3548e-06		AT1G02220	0.0105511	1.40621e-05
AT3G01480	-0.00602862	0.000266272		AT1G33260	0.0183402	1.41156e-05						AT3G14210	-0.00436698	1.35706e-06		AT2G02950	-0.00905382	1.4211e-05
AT3G10270	-0.0106148	0.000266926		AT2G38530	0.0336576	1.41156e-05						AT3G56370	-0.00485309	1.38318e-06		AT2G22450	0.00708567	1.43092e-05
AT1G22330	-0.0283787	0.000266993		AT4G15545	-0.0102251	1.41421e-05						AT2G24060	-0.00289055	1.39074e-06		AT4G29060	-0.00487906	1.50246e-05
AT1G51200	0.00834841	0.000266993		AT4G37980	0.0119376	1.42453e-05						AT1G79110	0.00589818	1.43098e-06		AT5G67390	-0.00704164	1.50246e-05
AT5G51550	-0.0134694	0.000266993		AT5G08640	0.0165574	1.43455e-05						AT3G50900	0.0090577	1.49752e-06		AT2G16700	0.00636349	1.51704e-05
AT5G22640	-0.00882132	0.000270002		AT2G34150	0.0144566	1.48347e-05						AT1G56600	0.0138414	1.51656e-06		AT2G37550	-0.00451498	1.59119e-05
AT2G44640	-0.0164526	0.000270343		AT2G46710	-0.0113214	1.48347e-05						AT4G15260	0.00731757	1.52565e-06		AT5G66040	-0.00455993	1.59535e-05
AT4G09040	-0.0101561	0.000273967		AT3G09770	0.00831944	1.50911e-05						AT2G22990	-0.00585495	1.52628e-06		AT3G03990	-0.00630234	1.5977e-05
AT4G12600	-0.0163389	0.000273967		AT3G53230	0.0217544	1.50923e-05						AT3G23910	0.00469185	1.52803e-06		AT1G72500	-0.00333881	1.59973e-05
AT5G52650	-0.013722	0.000278769		AT3G04730	-0.0114036	1.54406e-05						AT2G34470	0.00432135	1.60449e-06		AT1G54570	0.00667301	1.61115e-05
AT3G47450	-0.0116503	0.000279375		AT1G28660	-0.0282676	1.56838e-05						AT5G44572	0.0141565	1.62144e-06		AT1G23480	-0.0115938	1.61318e-05
AT2G38120	-0.0138666	0.000280407		AT3G27250	0.0401889	1.57294e-05						AT1G05540	-0.00808547	1.62269e-06		AT3G14180	0.00495703	1.63445e-05
AT3G45160	0.0170476	0.000280407		AT1G80180	-0.0135636	1.59908e-05						AT1G33260	0.00708413	1.63246e-06		AT5G20250	-0.0212146	1.66441e-05
AT1G13990	0.0216784	0.000282151		AT2G42380	-0.0123786	1.61292e-05						AT3G62650	0.00400462	1.63246e-06		AT3G60415	0.00774108	1.72767e-05
AT4G26300	-0.00877728	0.000282308		AT4G19170	-0.011182	1.61412e-05						AT5G41750	0.0113252	1.63698e-06		AT5G52940	-0.0157527	1.72767e-05
AT1G12020	-0.0192398	0.000286944		AT3G02850	0.0309099	1.62512e-05						AT1G30680	-0.00389735	1.65911e-06		AT2G22990	-0.00636657	1.7342e-05
AT1G75400	0.0156703	0.000290756		AT3G56970	-0.0481553	1.63522e-05						AT5G23850	0.00678292	1.65911e-06		AT1G65320	-0.00486968	1.73805e-05
AT5G66530	-0.00814472	0.000290756		AT3G60380	-0.00943452	1.66613e-05						AT1G07320	-0.00277877	1.66561e-06		AT3G22235	-0.0197802	1.74186e-05
AT1G74040	-0.00995001	0.000291881		AT5G39020	-0.04718	1.7233e-05						AT3G01090	0.0029483	1.71499e-06		AT3G05880	0.00618597	1.77559e-05
AT2G17220	0.0132803	0.000294747		AT2G15080	-0.0236287	1.73189e-05						AT5G50915	-0.00840916	1.73647e-06		AT5G66460	0.00545657	1.7974e-05
AT2G23130	-0.0185821	0.000299577		AT5G18670	-0.0183368	1.73602e-05						AT2G04780	-0.00432384	1.75285e-06		AT2G22125	-0.00387201	1.79848e-05
AT5G27120	-0.0221628	0.000300935		AT4G23750	0.0127223	1.74411e-05						AT2G44210	-0.00442336	1.76253e-06		AT1G30230	0.00305296	1.81588e-05
AT3G53130	-0.0100539	0.000303035		AT1G13210	-0.0169132	1.77663e-05						AT3G07460	-0.00470733	1.76253e-06		AT1G01790	-0.00542293	1.82583e-05
AT3G20100	0.0197669	0.000305495		AT3G28080	-0.0166189	1.78268e-05						AT5G42530	0.00703649	1.77716e-06		AT5G57030	-0.00407501	1.82583e-05
AT1G70070	-0.00939543	0.000305987		AT5G49170	-0.0247941	1.78665e-05						AT5G46580	-0.00425989	1.77716e-06		AT1G03220	-0.0062212	1.82962e-05
AT5G09870	-0.00650554	0.000305987		AT2G46800	0.0121598	1.81011e-05						AT5G24380	0.00783786	1.78456e-06		AT5G63180	-0.00632255	1.9252e-05
AT1G18080	-0.0103447	0.000306126		AT1G73750	-0.014644	1.82724e-05						AT4G22010	-0.00474901	1.79343e-06		AT1G71020	-0.00678711	1.9278e-05
AT3G04650	-0.0127958	0.000306126		AT4G30610	-0.0168845	1.87277e-05						AT5G39860	-0.00799041	1.84687e-06		AT3G27300	0.00419088	1.95748e-05
AT2G45600	0.0163594	0.000306491		AT3G48290	-0.0238144	1.94714e-05						AT1G28260	0.00637867	1.85801e-06		AT4G17230	0.00580812	1.99034e-05
AT3G63510	-0.0156869	0.000306491		AT5G55970	-0.0208055	1.94765e-05						AT1G64620	0.00592577	1.85801e-06		AT1G10682	-0.00829148	1.99136e-05
AT1G17650	-0.0104219	0.000309121		AT5G48480	0.0140899	1.99925e-05						AT1G68020	0.00331507	1.85801e-06		AT3G16530	-0.0236634	1.99175e-05
AT5G62000	0.00612694	0.00031104		AT4G23050	0.0107943	2.04329e-05						AT3G44100	0.00415673	1.88534e-06		AT3G13480	-0.00549084	2.03514e-05
AT2G41900	0.00779349	0.00031281		AT3G54660	0.0057579	2.08996e-05						AT2G15080	0.00694761	1.90477e-06		AT5G11670	-0.00472521	2.03514e-05
AT4G15510	-0.00818701	0.000315858		AT3G06060	-0.0107758	2.09649e-05						AT5G38240	0.00973166	1.94291e-06		AT5G05270	0.00801915	2.04047e-05
AT2G44740	-0.0324011	0.000316317		AT1G79970	0.0150561	2.15182e-05						AT1G28610	-0.00402626	2.01236e-06		AT5G36940	-0.00444104	2.08524e-05
AT3G11820	0.0239504	0.00031668		AT5G11610	-0.018145	2.169e-05						AT3G51870	-0.00487231	2.01236e-06		AT5G44340	-0.00474431	2.10349e-05
AT1G21440	0.0119628	0.000317023		AT1G32450	-0.0180865	2.17644e-05						AT5G50200	0.00999401	2.08577e-06		AT2G29320	-0.00424766	2.12864e-05
AT2G24150	-0.00954671	0.000318126		AT3G07470	-0.012729	2.1976e-05						AT3G18130	-0.00414093	2.09466e-06		AT1G23390	-0.0137837	2.14338e-05
AT4G37680	0.00902802	0.000321783		AT4G23670	0.0163896	2.20816e-05						AT1G64970	0.00337919	2.11413e-06		AT1G72510	-0.0063671	2.14977e-05
AT2G22660	0.0124813	0.000323031		AT3G44300	0.0250611	2.21052e-05						AT1G73040	0.0138632	2.1296e-06		AT1G67360	0.00854045	2.15029e-05
AT2G28910	0.00711245	0.000324314		AT2G47780	0.0355459	2.27108e-05						AT5G10480	0.00505325	2.13449e-06		AT3G21150	0.0106395	2.15029e-05
ATCG01130	-0.0158581	0.000329124		AT2G25530	0.0160641	2.28369e-05						AT5G10250	-0.0122265	2.14282e-06		AT1G06180	0.00828299	2.15797e-05
AT4G28490	0.0203616	0.000330209		AT4G36500	-0.0228143	2.29089e-05						AT1G26450	0.00657259	2.15555e-06		AT3G26690	0.0116038	2.16429e-05
AT5G05580	-0.00983586	0.000338282		AT5G20830	0.011545	2.38804e-05						AT1G58360	0.00593878	2.17813e-06		AT5G53160	-0.00907456	2.18133e-05
AT3G28200	-0.0127515	0.000345909		AT5G35735	-0.0184771	2.39452e-05						AT5G62470	0.00749786	2.18561e-06		AT2G23000	0.00568202	2.21527e-05
AT2G36885	-0.0220766	0.000349683		AT5G45490	-0.00970452	2.45946e-05						AT2G41900	0.00396169	2.22671e-06		AT2G28800	-0.00387529	2.21527e-05
AT5G63420	-0.0139646	0.000349683		AT2G03350	-0.0147178	2.4722e-05						AT5G49910	-0.00542796	2.27574e-06		AT2G46870	-0.00493321	2.22031e-05
AT3G25520	-0.0132837	0.0003542		AT3G19480	-0.0104164	2.4722e-05						AT4G20320	0.00770666	2.31133e-06		AT1G69510	0.00423643	2.22729e-05
AT4G02410	0.0135815	0.000356595		AT1G35320	0.0199487	2.5012e-05						AT5G54080	0.00558557	2.34762e-06		AT5G03200	0.00567549	2.23182e-05
AT1G28600	-0.0121786	0.000358874		AT5G57780	-0.0171052	2.51911e-05						AT5G64580	-0.00331783	2.37219e-06		AT5G04590	-0.00427839	2.23216e-05
AT5G11450	-0.00965356	0.000359332		AT3G48720	-0.017704	2.53587e-05						AT1G48260	-0.00793986	2.44906e-06		AT5G45680	-0.00580025	2.24762e-05
AT5G13630	-0.00607128	0.000368062		AT3G50480	-0.0551841	2.53821e-05						AT5G50720	0.00886141	2.45192e-06		AT2G12400	0.00550184	2.27954e-05
AT1G02390	0.030824	0.000369588		AT1G02640	-0.0284832	2.60603e-05						AT5G53120	0.00682666	2.52378e-06		AT3G11580	0.0104339	2.27954e-05
AT5G28500	-0.0076327	0.000373069		AT3G08600	-0.0147739	2.61883e-05						AT5G28500	-0.00339392	2.52455e-06		AT5G10770	-0.00958101	2.30534e-05
AT4G38860	-0.0141019	0.000375006		AT2G39450	0.00982196	2.71728e-05						AT4G36360	-0.00433425	2.55183e-06		AT3G18050	-0.00560632	2.33416e-05
AT1G66880	0.0185778	0.000375169		AT4G10960	0.0355028	2.77183e-05						AT4G35110	0.0080249	2.55354e-06		AT1G58225	-0.0283373	2.34988e-05
AT4G24960	0.0134517	0.000376954		AT3G61490	0.0155482	2.81237e-05						AT5G22630	0.00477541	2.55497e-06		AT5G05600	0.0155084	2.35456e-05
AT2G46440	0.0247929	0.000377712		AT2G38870	0.014652	2.89096e-05						AT5G53300	0.00352798	2.56343e-06		AT1G65960	-0.00503742	2.36772e-05
AT5G65280	0.0275218	0.000380215		AT1G79110	0.018	2.98936e-05						AT2G32010	-0.00458754	2.60477e-06		AT1G64660	0.0175949	2.3835e-05
AT1G04990	0.0167601	0.000381188		AT1G73390	0.0121196	3.02955e-05						AT3G10050	-0.0045163	2.70601e-06		AT4G10500	-0.0304244	2.3835e-05
AT3G05060	-0.0189916	0.000381188		AT1G55360	-0.00794426	3.16782e-05						AT4G38560	0.0156614	2.711e-06		AT4G22380	0.00652781	2.3889e-05
AT3G61200	0.0148372	0.000381484		AT3G05380	0.00969809	3.18425e-05						AT5G55740	-0.00414453	2.72512e-06		AT1G75220	-0.00515193	2.43572e-05
[truncated: 2,049 more rows]

## Sheet: Root - Pairwise DE Genes
Hard Agar 2.5x - 926 genes				Hard Agar 1.67x - 465 genes				Hard Agar 1.25x - 4 genes				PEG 28% - 1486 genes				PEG 20% - 486 genes				PEG 12% - 46 genes				Mannitol 200mM - 2313 genes				Mannitol 100mM - 138 genes				Mannitol 50mM - 57 genes				NaCl 150mM - 3221 genes				NaCl 75mM - 454 genes				NaCl 30mM - 36 genes
[truncated: 3,222 more rows]

[truncated: 5 more sheets: Shoot - Pairwise DE Genes, Root - Normalized Read Counts, Shoot - Normalized Read Counts, Figure 2A Raw Data (Shoot), Figure 2B Raw Data (Root)]
