# Supplementary material for: Arabidopsis transcriptome responses to low water potential using high throughput plate assays
Source: bioRxiv preprint, doi:10.1101/2022.11.25.517922, version 3 (2024-03-25)
Supplement: Supplementary File 5 [file 517922_file06.xlsx]

## Sheet: Seedling Shoot Area
Table S5 - Seedling shoot area size in response to different levels of LS media or agar concentration
LS media (X)	Agar (%)	Replicate (individual plant)	Rosette Area (no. of pixels)
1	2	1	41504
1	2	2	50976
1	2	3	58512
1	2	4	50944
1	2	5	46832
1	2	6	28800
1	2	7	44960
1	2	8	54016
1	2	9	42096
1	2	10	42480
1	2	11	42176
1	2	12	36240
1	2	13	55264
1	2	14	38432
1	2	15	49200
1	2	16	44416
1	2	17	51440
1	2	18	46992
1	2	19	59840
1.25	2.5	1	41552
1.25	2.5	2	24736
1.25	2.5	3	29360
1.25	2.5	4	41904
1.25	2.5	5	34992
1.25	2.5	6	18368
1.25	2.5	7	33632
1.25	2.5	8	38240
1.25	2.5	9	32832
1.25	2.5	10	46608
1.25	2.5	11	36336
1.25	2.5	12	44560
1.25	2.5	13	33520
1.25	2.5	14	39696
1.25	2.5	15	35088
1.25	2.5	16	41952
1.25	2.5	17	31584
1.25	2.5	18	32880
1.67	3.3	1	37744
1.67	3.3	2	30688
1.67	3.3	3	39936
1.67	3.3	4	34608
1.67	3.3	5	22992
1.67	3.3	6	29744
1.67	3.3	7	29104
1.67	3.3	8	31024
1.67	3.3	9	26960
1.67	3.3	10	26848
1.67	3.3	11	33664
1.67	3.3	12	36464
1.67	3.3	13	25776
1.67	3.3	14	36048
1.67	3.3	15	39792
1.67	3.3	16	41280
1.67	3.3	17	26976
2.5	5	1	13456
2.5	5	2	14080
2.5	5	3	13664
2.5	5	4	16096
2.5	5	5	18928
2.5	5	6	9040
2.5	5	7	17472
2.5	5	8	18224
2.5	5	9	17264
2.5	5	10	15792
2.5	5	11	18576
2.5	5	12	19312
2.5	5	13	15376
2.5	5	14	17904
2.5	5	15	14848
2.5	5	16	13616
2.5	5	17	20048
2.5	5	18	18608
1	2.5	1	36128
1	2.5	2	32000
1	2.5	3	49712
1	2.5	4	20544
1	2.5	5	28208
1	2.5	6	28768
1	2.5	7	38624
1	2.5	8	35648
1	2.5	9	30752
1	2.5	10	34112
1	2.5	11	35568
1	2.5	12	35872
1	2.5	13	28528
1	2.5	14	37856
1	2.5	15	27264
1	2.5	16	38752
1	2.5	17	30768
1	3.3	1	35520
1	3.3	2	21744
1	3.3	3	37008
1	3.3	4	30928
1	3.3	5	43952
1	3.3	6	35536
1	3.3	7	32544
1	3.3	8	40896
1	3.3	9	28768
1	3.3	10	27408
1	3.3	11	36160
1	5	1	22864
1	5	2	19312
1	5	3	17232
1	5	4	24464
1	5	5	23568
1	5	6	25872
1	5	7	15296
1	5	8	14912
1	5	9	17664
1	5	10	26208
1	5	11	12688
1.25	2	1	51168
1.25	2	2	51904
1.25	2	3	63072
1.25	2	4	55568
1.25	2	5	46592
1.25	2	6	53040
1.25	2	7	37840
1.25	2	8	54176
1.25	2	9	47392
1.25	2	10	53392
1.25	2	11	66256
1.25	2	12	55008
1.25	2	13	46208
1.25	2	14	49504
1.25	2	15	62656
1.25	2	16	51456
1.25	2	17	52016
1.25	2	18	49504
1.67	2	1	38208
1.67	2	2	39696
1.67	2	3	45184
1.67	2	4	55344
1.67	2	5	43312
1.67	2	6	33936
1.67	2	7	48720
1.67	2	8	46000
1.67	2	9	47136
1.67	2	10	36480
1.67	2	11	48032
1.67	2	12	74128
1.67	2	13	41648
1.67	2	14	38256
1.67	2	15	44336
1.67	2	16	45936
1.67	2	17	43136
1.67	2	18	53728
2.5	2	1	32672
2.5	2	2	41168
2.5	2	3	28688
2.5	2	4	32752
2.5	2	5	32160
2.5	2	6	26112
2.5	2	7	28224
2.5	2	8	33904
2.5	2	9	19568
2.5	2	10	36720
2.5	2	11	33632
2.5	2	12	30224
2.5	2	13	29264
2.5	2	14	28544
2.5	2	15	20768
2.5	2	16	31488
2.5	2	17	34064
2.5	2	18	26480
