# Supplementary material for: Arabidopsis transcriptome responses to low water potential using high throughput plate assays
Source: bioRxiv preprint, doi:10.1101/2022.11.25.517922, version 3 (2024-03-25)
Supplement: Supplementary File 6 [file 517922_file07.xlsx]

## Sheet: Normalized Reads
Table S6 - Gene expression responses to different combinations of agar and nutrient concentrations
Normalized reads of seedlings treated on different agar and nutrient combinations
Differentially expressed genes found dose responsive to HA media
Differentially expressed genes found dose responsive to an increase in nurient concentration
Differentially expressed genes found dose responsive to agar concentration
				HA treatment									Agar concentration treatment							Nutrient concentration treatment
LS Media (X)	1	1	1	2.5	2.5	2.5	1.67	1.67	1.67	1.25	1.25	1.25	1	1	1	1	1	1	1	2.5	2.5	2.5	1.67	1.67	1.67	1.25	1.25	1.25
Agar (%)	2	2	2	5	5	5	3.3	3.3	3.3	2.5	2.5	2.5	5	5	5	3.3	3.3	2.5	2.5	2	2	2	2	2	2	2	2	2
AT1G01010	104	157.5	140.5	181	198	197	174	111.5	115	201.5	129.5	97	96.5	93	115	89.5	68.5	91.5	96	131.5	90	140	88	89	117.5	157.5	102.5	119.5
AT1G01020	50.5	42.5	27	35	38	59	13	22.5	38	30	28	46.5	18	11.5	17	24.5	17	43.5	31	19	20	31	62.5	43.5	13.5	53	39.5	19.5
AT1G01030	13.5	4.5	4.5	5.5	3.5	2	2.5	3.5	3	0	0	30	0	3	6	4.5	1	2	1	6	3.5	6	0	4.5	0	2.5	3	0
AT1G01040	165	208	140.5	138.5	154	108	136	148.5	113.5	115.5	153	234	90	150	156.5	86	176	167	189	135	144	146	127.5	117.5	148	183.5	203.5	179
AT1G01050	230	169.5	308.5	337	308.5	296.5	292	275	301	255	248.5	146	337	272	289	383.5	403	362.5	305	351.5	314	308.5	357	322.5	411.5	281.5	331	290
AT1G01060	414	495.5	444	419	429	434	337.5	472	365.5	392	370.5	451.5	232.5	270.5	276	306.5	232.5	258.5	257.5	282.5	267.5	326	140.5	354	287	351.5	421.5	273
AT1G01070	109	42.5	111	146.5	146	141	131.5	152	112	166.5	114.5	128.5	85.5	67.5	83	102.5	108.5	76	107	165.5	130.5	148	76	91	158.5	88.5	79	83
AT1G01080	8	6	42.5	19	11.5	14.5	21	20.5	2	43.5	12.5	6	17	16	16	24.5	33.5	24.5	14.5	10.5	16.5	17	0	27.5	18	46.5	10	7
AT1G01090	626.5	533.5	626.5	517.5	510	502.5	577.5	538.5	568	577.5	607.5	659	666.5	645.5	592.5	626.5	689	697	713	574	592	521	624	613.5	608	628	541	634.5
AT1G01100	666	790.5	742.5	832	776	875.5	954.5	666	756	764	701	818	788	695	693	650.5	767.5	975.5	752.5	697	758.5	722	624.5	809.5	814	722.5	850	684
AT1G01110	3.5	8.5	24.5	31	34	22.5	31	16.5	36.5	12.5	20	0	27	29	38.5	24.5	30	34	23.5	24.5	17	19.5	0	21.5	36.5	24.5	7.5	11.5
AT1G01120	459.5	531.5	426.5	347.5	374	346	385	353.5	373.5	368	468.5	308.5	364.5	421	394.5	378.5	392	313.5	438.5	396.5	368.5	345.5	323.5	425	570	338.5	328.5	394
AT1G01130	3.5	6	13.5	5	5.5	4.5	2.5	9	2	0	3	6	11.5	11	8	12.5	9	8	12.5	7	3.5	4.5	14.5	0	0	6	26	7
AT1G01140	1	10.5	10.5	17	14	12	9	2	8	7	5	21.5	6	9.5	12.5	3.5	0	6	8	16.5	12.5	13.5	0	4.5	5	5	5	2.5
AT1G01160	62.5	89	49.5	58	49.5	73.5	97	56	42.5	101.5	51	119	89	86	74	72.5	57	90	64.5	64.5	73.5	41.5	62.5	39	96	58	42.5	48
AT1G01170	8	10.5	6	7	1	8	9	3.5	9	16	7	0	16	11	9.5	9.5	6	5	8	12.5	10	15.5	0	0	9	3.5	5	14.5
AT1G01180	30	15	15	21	23.5	18.5	23.5	18.5	10.5	22.5	25.5	25.5	51	28	40.5	36	15	14.5	22.5	27	14.5	18.5	62.5	9.5	5	20	26	19.5
AT1G01190	239	195.5	256	31	54	60	116.5	81.5	169.5	112	104	128.5	152	165	181.5	195.5	215.5	198	216.5	89	133.5	96.5	209	203	320	217	229.5	282
AT1G01200	24.5	29	22.5	18	19.5	16	23.5	22.5	20	12.5	48.5	0	36	32	24.5	27	36.5	24.5	21.5	28	32	26	14.5	15	27	18	34.5	14.5
AT1G01210	16.5	24.5	15	30	24.5	24.5	38.5	30.5	20	47	25.5	13.5	22.5	32	19	25.5	35	28.5	23.5	24.5	21.5	21.5	50	39	22.5	26	32	42.5
AT1G01220	88	67.5	52	101	84	100.5	69.5	92	88	76	120	71.5	50.5	89	97	67.5	110	76	66.5	85	95	79	62.5	35	117.5	67.5	68	105.5
AT1G01225	28.5	31	38.5	17	17	26.5	21	14.5	29	10	22.5	46.5	23.5	22.5	22.5	32	9	24.5	20	23.5	13.5	19.5	0	33.5	18	26	23.5	32
AT1G01230	88	65	54	107.5	94	78	107	97.5	81	58	71.5	80	131.5	85	85	123.5	92.5	108	112	102.5	98.5	87	62.5	95	51	79	37	134
AT1G01240	53.5	40.5	59	92.5	81.5	97.5	91	93.5	88	47	51	66.5	52	59.5	60.5	69.5	58.5	51.5	74	72	67	89	113	53	65.5	87	50.5	97
AT1G01260	43.5	72	42.5	42.5	50.5	43.5	35	38.5	47.5	50.5	51	34.5	44.5	64.5	55.5	34	65.5	50	56	59.5	52.5	55	37.5	87	65.5	58	37	72.5
AT1G01290	46.5	15	52	37.5	54	29	40	34	30	86.5	28	62	38.5	33	36.5	37	35	44.5	45	39	44.5	44.5	62.5	59	32	31	18	35
AT1G01300	116.5	130.5	170	138.5	116.5	156	189	124	148.5	94	146	115	177.5	188	150	196	145	186	166.5	145	178	108	100.5	111	70.5	151	165.5	134
AT1G01320	79.5	69.5	96.5	115	119.5	76	98.5	138	118.5	105	85	88	66.5	91	78.5	65.5	103.5	95	87	123.5	128.5	134	100.5	119.5	80.5	97	71	75
AT1G01340	135	164	63.5	47	42	42.5	62.5	81.5	59	94	79.5	88	58.5	68.5	69.5	95	72.5	63.5	78	44.5	46	34	88	74	41.5	71.5	120.5	114
AT1G01350	58	31	49.5	66.5	72	65.5	62.5	60	71.5	16	59	38.5	59	62	69.5	64.5	65.5	58.5	64.5	72.5	76	69.5	50	78	127.5	79	59	32.5
AT1G01360	65.5	58.5	49.5	43.5	44.5	57	37.5	56	34	119.5	71.5	58.5	42.5	41.5	36.5	31	50	41.5	36.5	35	37.5	52	14.5	51	41.5	40.5	53.5	32.5
AT1G01370	3.5	6	4.5	23.5	16	21	8	9	15	26	9.5	0	17	14	14	17	38.5	23.5	15	10	10	15	14.5	17	9	15	21	11.5
AT1G01380	6	0	20	6	11.5	18.5	12.5	24.5	10.5	7	5	6	7.5	9.5	6	17	25.5	9.5	12.5	6	10.5	9.5	0	21.5	5	13.5	18	14.5
AT1G01420	21	4.5	10.5	10.5	14	10.5	9	5	9	16	15	30	11.5	22.5	18	16	27	13.5	14.5	24.5	11.5	22.5	0	13.5	5	13.5	15.5	11.5
AT1G01430	53.5	82	65.5	56	58.5	70.5	65.5	73.5	89.5	109	59	93	88	59.5	83.5	91	58.5	60	84	84.5	58.5	76.5	88	87	96	85.5	73.5	91
AT1G01440	58	60.5	56	39.5	56	50.5	55	36.5	47.5	54	56	54	37	36.5	52	43.5	38.5	49.5	49	58	41.5	44.5	26	25.5	36.5	29	45.5	51
AT1G01448	10.5	4.5	24.5	12.5	12	17	14.5	2	10.5	0	38	13.5	15	9.5	11.5	9	7	23.5	21	13.5	20.5	16	14.5	4.5	13.5	15	15.5	16.5
AT1G01470	244	169.5	337.5	907.5	921	1082.5	739.5	598.5	596	413	288	356	474.5	342	288	344	296.5	320.5	270.5	774.5	703	907.5	282	410	443	263.5	165.5	262.5
AT1G01480	12.5	8.5	17	18	31.5	30	13.5	30.5	10.5	19.5	15	25.5	10.5	9.5	10.5	9	14	9.5	15	14	12.5	14	0	7.5	9	9	7.5	19.5
AT1G01490	76.5	105.5	56	105.5	74.5	103.5	122.5	104	88	83.5	95.5	123.5	195.5	129.5	113	136	129.5	111	104.5	74	85.5	95	100.5	74	137.5	81	135	78
AT1G01500	22.5	49.5	45.5	31	19.5	17	42.5	22.5	26.5	76	28	30	32	32	38.5	36	27	35	36.5	27.5	25	26	37.5	47	41.5	31	15.5	4.5
AT1G01510	151.5	159	157	189	152	150.5	202.5	119.5	146	242	179	101.5	125	147	136.5	153	115	151.5	140.5	153	155.5	175	88	131.5	137.5	151	96.5	134
AT1G01520	1	6	0	5.5	8	4.5	6	5	3	10	7	0	1.5	3	0	1.5	6	0	0	3.5	5.5	2	88	9.5	0	2.5	7.5	4.5
AT1G01540	136	121.5	120.5	136	130.5	134	179.5	124	113.5	76	117.5	88	91	144	135	123.5	106.5	116.5	119.5	127.5	165.5	149.5	100.5	163	65.5	117.5	162.5	122
AT1G01550	647.5	654	463	587	593	608	550	568.5	571	624.5	714	675	560.5	573.5	530.5	590.5	613	572	587.5	624	596	640.5	681.5	607.5	614.5	466	713	572
AT1G01560	5	4.5	4.5	2	6	7	2.5	0	2	0	0	6	2.5	3	0	1.5	2.5	1	5.5	4.5	2	7	37.5	9.5	9	1	0	2.5
AT1G01570	15	6	40.5	10.5	19.5	18.5	9.5	22.5	16.5	19.5	5	21.5	11.5	7.5	8	14	0	13.5	14.5	14	17	12.5	0	13.5	5	6	23.5	11.5
AT1G01580	67.5	63	63.5	19	38	7	13.5	61.5	12.5	86.5	31	75	11.5	14	24.5	39.5	38.5	68.5	49	30	9.5	16	26	11.5	9	26	10	35
AT1G01600	47.5	44.5	47.5	63.5	64	49	36	60	39.5	72	64	42.5	49.5	64.5	48.5	42.5	17	34.5	41.5	32	38.5	36	37.5	23.5	36.5	42.5	29	32.5
AT1G01610	374	261	345	158.5	151	107	243	286.5	249	163	248.5	284.5	339	277	260	327	241.5	192	265.5	212	178	170.5	153	198	101.5	206.5	200	211.5
AT1G01620	2367	2294.5	2294.5	1963	1929.5	1856	2227	2267.5	2206	2016	2174.5	2227	1871	1955.5	1738	2374	1904	1779.5	1984.5	1912.5	1723	2206	1904	2071	1627	1838.5	1844	1880.5
AT1G01630	151.5	153	185.5	130.5	130.5	169.5	144	131.5	112	130.5	164	115	141	156	162.5	196	168.5	165.5	149.5	148.5	142.5	141	209	99	133	119.5	150	156.5
AT1G01640	52	47	27	79.5	63.5	68.5	93	65.5	51.5	50.5	48.5	42.5	56	61	54	62	57	60	74.5	72.5	72.5	67.5	37.5	59	61	62	68	45.5
AT1G01650	154	98.5	140.5	148.5	156.5	141	176	140.5	164.5	182	146	80	122.5	128.5	132.5	124.5	78	160.5	138.5	159	122.5	133.5	140.5	119.5	85.5	154	178	111
AT1G01660	9.5	6	0	4.5	7	9.5	8	9	14	0	3	25.5	3.5	9.5	9.5	4.5	1	8	6.5	11.5	6	5.5	0	4.5	5	10.5	3	9.5
AT1G01670	15	19.5	15	16	6	12	9	20.5	16.5	0	12.5	13.5	10.5	9.5	10	7	7	4.5	13.5	5	15.5	7	14.5	0	9	3.5	3	11.5
AT1G01690	25.5	19.5	8.5	21.5	23.5	24.5	25.5	18.5	19	16	9.5	17	10.5	21.5	20	23.5	27	30	25	19	19	18	0	51	22.5	24.5	18	38
AT1G01700	2.5	2.5	4.5	7	7	2	6	2	0	0	7	0	1.5	5.5	5.5	6	12	9.5	8	5	4	4.5	14.5	2.5	0	5	5	14.5
AT1G01710	111	94	72.5	103.5	114	108	101.5	109.5	98.5	98	61.5	84	106	85	106.5	117.5	101.5	105.5	104.5	113	124.5	111.5	0	74	65.5	101.5	120.5	83
AT1G01715	5	2.5	6	12.5	14.5	17	14.5	7	8	0	12.5	0	9.5	7	10	9	10.5	13.5	11.5	10	15	10.5	0	0	61	12.5	7.5	7
AT1G01720	258.5	224	188	364.5	423.5	454	392	454	350.5	238	322.5	267	255.5	239	255	277	240	266.5	240.5	233	261	251	113	236.5	188	180	200	197
AT1G01725	6	8.5	10.5	9.5	5	3.5	2.5	3.5	4.5	26	0	6	4.5	0	5	1.5	2.5	3.5	1	0	0	4.5	14.5	7.5	5	0	18	19.5
AT1G01730	70	94	77	73.5	80	64	78	67.5	75	94	45.5	115	101	62.5	82	86	103.5	90	78	80.5	63.5	77.5	26	91	51	64.5	85	105.5
AT1G01740	16.5	33.5	15	9.5	11.5	9.5	13	22.5	16.5	30	12.5	6	17	17	13.5	10.5	20	19	17	17.5	15.5	18.5	0	7.5	27	20	15.5	16.5
AT1G01760	5	15	4.5	16	12	13.5	11.5	12.5	8	26	3	0	2.5	7	9	7	18.5	4.5	13.5	11.5	7	11.5	0	0	27	9	10	0
AT1G01770	37.5	47	49.5	63.5	54	73.5	72.5	34	67.5	94	43.5	17	33.5	56	46	46.5	41.5	51	50.5	71.5	67.5	64	50	76	27	38	88	48
AT1G01780	56	40.5	70.5	58.5	38	56	63	50.5	53	22.5	45.5	50.5	100.5	83.5	66.5	96	39.5	80	74	56	52.5	51.5	14.5	101.5	96	39.5	37	53.5
AT1G01790	115.5	58.5	86.5	76	77.5	82	77	87.5	88	163	82	115	80	96	82	83.5	83.5	67.5	94	94	105	79	88	74	56	85.5	120.5	67.5
AT1G01800	118.5	145	106.5	143.5	148.5	169.5	153.5	174	137.5	141.5	143.5	165	163	146	172.5	161.5	105	139.5	148.5	143.5	158	140	269	137.5	122.5	108	150	181
AT1G01820	71.5	140	79.5	99	123.5	84.5	118.5	108	114	86.5	101.5	62	196	142.5	128.5	142.5	125.5	122.5	116.5	131	118.5	119	62.5	105	112.5	134	120.5	114
AT1G01830	53.5	40.5	34	45	43.5	39.5	42.5	40.5	38	19.5	33	34.5	45.5	48.5	38	48	39.5	34	34	30	40.5	36	14.5	39	41.5	33.5	26	38
AT1G01860	15	8.5	10.5	9.5	14.5	14.5	13	10.5	8	0	9.5	0	4.5	4.5	9.5	7	6	8	12.5	10.5	11.5	8	14.5	7.5	18	15	21	9.5
AT1G01880	6.5	4.5	0	1	5.5	3.5	3.5	5	6.5	0	9.5	0	4.5	2	3.5	5.5	7	7	5.5	2	2	9	0	0	9	1	5	0
AT1G01900	5	10.5	6	7	12	14.5	18	10.5	17.5	19.5	7	6	1	9.5	6	5.5	6	3.5	3.5	13.5	12.5	11.5	14.5	9.5	18	10.5	0	0
AT1G01910	105.5	123.5	106.5	135	130	122.5	131.5	134	112	72	117.5	150.5	103	120.5	119.5	95.5	130.5	118.5	103	119.5	137.5	118.5	50	129.5	101.5	113	141.5	78
AT1G01920	52	54	72.5	84	81.5	74.5	112	81.5	83.5	86.5	40.5	17.5	60	89.5	65.5	69.5	50	89	70.5	61	70.5	68.5	26	33.5	46	59	48	64
AT1G01930	33	47	24.5	45.5	36	47.5	43.5	34	35	33.5	38	21.5	31	30.5	38.5	26.5	35	41.5	45	27.5	38.5	33	0	7.5	22.5	53	39.5	27
AT1G01940	30	35.5	42.5	39.5	39.5	49	46	34	50	19.5	33.5	62	65	46.5	43.5	49	41.5	70.5	51.5	53	46.5	33	50	25.5	9	27.5	56	56
AT1G01950	85.5	96	82	108	68.5	73.5	101.5	71.5	95	83.5	131.5	115	65.5	102	95	78.5	85	83	83.5	87.5	96.5	98.5	26	101.5	80.5	127	123.5	80
AT1G01960	400.5	304	326	396.5	394	373	365	354	378.5	324	438	324	235.5	349.5	354	313.5	392.5	329.5	344	392	461.5	347.5	282	385	320	444	503.5	377.5
AT1G01970	27	8.5	29	24.5	12.5	19.5	24.5	7	22.5	19.5	7	25.5	12.5	15	19.5	14	17	17	15	21.5	23.5	18.5	50	15	32	21.5	7.5	27
AT1G01990	27	29	42.5	38.5	29	24.5	33.5	28.5	36.5	0	51	17.5	37	34	41.5	34	39.5	43.5	37.5	33	42.5	35	0	51	18	45	34.5	22
AT1G02000	42	56	47.5	50	48.5	50.5	49.5	83.5	53	22.5	74	46.5	52	60.5	55.5	55	46.5	43.5	53.5	42.5	41	47	62.5	41.5	32	35	32	48
AT1G02010	47.5	17	82	54	54	50.5	55	42.5	50	54	33.5	38.5	28	36	39.5	40	43	49	53.5	53	39.5	43.5	37.5	35	18	56	37	42.5
AT1G02020	28.5	42.5	17	25	21	21	32	30.5	25.5	50.5	35.5	17.5	33	29.5	29	34	29	23.5	21.5	22.5	29	19.5	14.5	13.5	32	39.5	39.5	14.5
AT1G02030	6.5	0	0	5.5	2.5	6	4.5	7	2	0	0	9.5	6	3.5	5	6	0	4.5	4.5	2.5	2.5	1	0	13.5	18	1	12.5	2.5
AT1G02050	8	6	20	34.5	22.5	23.5	31	16.5	21.5	16	7	21.5	27	15	24.5	25.5	20	34.5	23.5	20	30	34	0	19.5	13.5	22.5	7.5	11.5
AT1G02060	28.5	4.5	4.5	23.5	17.5	35.5	28	24.5	25.5	47	25.5	9.5	5	13.5	20.5	8.5	20	13.5	19	21.5	34	13.5	26	11.5	27	22.5	21	2.5
AT1G02080	597	620	660.5	630	622.5	641.5	504	614.5	560	631	737	517	295.5	563.5	535.5	425.5	497	496	567	598.5	683	561.5	462	629.5	628	624	629.5	743
AT1G02090	105.5	77	120.5	134	146.5	136.5	161.5	93.5	126	163	120.5	156	198	158.5	161.5	163	168.5	161.5	141	140.5	137.5	111	167.5	124.5	91	92	150	100
AT1G02100	141	142.5	159	137	130.5	114.5	138	142.5	107	226	181.5	138	153.5	157	141	138.5	134.5	169.5	179	132.5	143	126	209	168.5	127.5	159	120.5	179
AT1G02110	62.5	63	70.5	106.5	81.5	88.5	102.5	61.5	79	68.5	56	80	72.5	102	69.5	84	68.5	86.5	70.5	85.5	97.5	76	76	109	18	74.5	29	48
AT1G02120	320.5	287	261.5	221	230.5	230	224	298	234.5	166.5	214	299.5	212	246	244.5	201.5	303	225	256	231	209	246.5	323.5	285	188	261	223.5	300
AT1G02130	147	103	120.5	118.5	138	121	131.5	158.5	139.5	72	104	110.5	138.5	122.5	144	174.5	157	169.5	136.5	144	118.5	136	224.5	117.5	106.5	148.5	141.5	125
AT1G02140	186.5	182.5	170	213.5	232	245	184.5	262.5	205	122.5	168.5	234	214.5	193.5	184.5	214.5	199	256	230	192.5	165	234.5	140.5	207	203.5	190	206.5	249
AT1G02145	90	103	84.5	66.5	58.5	87	69.5	92	84.5	145	61.5	93	50.5	60.5	62.5	57.5	97.5	95	67.5	64.5	85.5	76	62.5	41.5	80.5	101.5	99.5	83
AT1G02150	50.5	72	70.5	60.5	58	70.5	83.5	46	88	133.5	90	46.5	67.5	75	64.5	72	70.5	73.5	58.5	61.5	70	83	88	101.5	122.5	38	50.5	42.5
AT1G02160	30	44.5	38.5	57	33	37	37.5	46	28	33.5	17	38.5	49.5	33	28	27.5	30	40.5	34	32	34	45.5	76	51	96	51.5	50.5	67.5
AT1G02170	104	86.5	126	105.5	93	98	120.5	93.5	79	65	114.5	80	138.5	106	96	135	105	118.5	111	104	107	74	113	43.5	32	81	116.5	56
AT1G02180	5	15	4.5	9	10	13.5	8	7	1	0	9.5	9.5	10.5	12.5	10.5	12.5	17	10	6	5.5	6	3.5	0	9.5	5	9	7.5	24.5
AT1G02205	12.5	29	20	72	80	84.5	59.5	20.5	29	40.5	20	30	15.5	22.5	34	34	20	26	23.5	42.5	55.5	27.5	62.5	25.5	18	15	26	11.5
AT1G02220	240.5	304	250.5	317	356	319.5	236.5	309.5	242	151.5	291.5	334	165	142	182	182	121.5	223.5	258	329.5	245	328.5	392	302	163.5	293.5	232	300
AT1G02230	18	26.5	20	7	9.5	6	14	7	14	10	9.5	9.5	10.5	9.5	11.5	2.5	7	4.5	10	7	8	9.5	37.5	19.5	13.5	16.5	10	14.5
AT1G02260	55	47	59	55	62.5	42.5	67	58	35	10	59	62	45.5	56	48.5	52	62	67.5	67.5	54	58.5	44.5	76	57	36.5	71.5	62.5	35
AT1G02270	61	58.5	47.5	45.5	59.5	44.5	43.5	63.5	42.5	37	43.5	66.5	45.5	48.5	42.5	58	27	44.5	50	58	52	44.5	14.5	119.5	51	33.5	37	56
AT1G02280	32	24.5	47.5	47	24.5	64	52	48.5	41.5	76	66.5	50.5	49.5	30.5	43	41.5	58.5	48	52	63.5	51	55	37.5	59	65.5	59	73.5	53.5
AT1G02290	13.5	31	24.5	28	20.5	29	15	10.5	25.5	43.5	17	46.5	17	38	25	27.5	38.5	29	25	28	25.5	32	26	17	41.5	45	12.5	30
AT1G02300	33	6	13.5	19	14	16	21	24.5	29	0	25.5	30	23.5	14	14	23.5	27	23.5	29	26.5	23.5	27	62.5	6	51	39.5	26	22
AT1G02305	247.5	237.5	235.5	242	272.5	234	251	308.5	234.5	260.5	279.5	168.5	386	311.5	259	309.5	253	260	245	283	278	249	255	329	188	265	178	239
AT1G02310	13.5	15	13.5	38	57	35.5	38.5	46	33	54	12.5	9.5	44.5	34	30	38.5	33.5	35	34	27.5	30	28.5	14.5	21.5	13.5	21.5	26	14.5
AT1G02330	82.5	31	89.5	96.5	102	92.5	104	93.5	99.5	37	129.5	80	103	116.5	92.5	83.5	83.5	107	93	99	101.5	109	88	114	168.5	84	42.5	97
AT1G02335	96	175	102	66	94	95	91	81.5	141	167	129.5	119	106.5	74	60.5	62	57	40.5	36	86	82	69.5	113.5	129.5	101.5	90	99.5	125
AT1G02340	18	15	10.5	5	7	1	7	7	8	43.5	5	9.5	2.5	3	1	1.5	2.5	5	4.5	12.5	5.5	20	26	2.5	13.5	9	10	7
AT1G02350	2.5	0	10.5	2.5	6	2	3.5	5	6.5	0	3	13.5	4.5	8.5	3.5	3.5	2.5	6	5.5	5	4.5	7	0	7.5	0	2.5	3	0
AT1G02360	93	98.5	47.5	34.5	48	27.5	39	48.5	35	61.5	35.5	97	137	86	97.5	64.5	33.5	29	41.5	37.5	25.5	21	76	67.5	51	46.5	39.5	64
AT1G02370	16.5	35.5	24.5	24.5	22.5	24.5	32	40.5	22.5	26	20	17.5	21.5	30.5	23.5	22.5	10.5	26.5	20	22.5	12.5	15	26	21.5	36.5	20	15.5	9.5
AT1G02380	10.5	4.5	8.5	3.5	6	7	4	12.5	1	0	3	0	6	3	3.5	5	20	3.5	4.5	11.5	6	9	0	4.5	5	5	10	4.5
AT1G02390	5	0	2.5	7	5.5	8	6	3.5	4.5	0	9.5	0	3.5	4.5	4.5	5.5	0	1	3.5	2	4.5	16	0	9.5	5	6	15.5	4.5
AT1G02400	32	31	38.5	72	81	61.5	82	90	44.5	47	56	34.5	66.5	51.5	78	64.5	50	30	45.5	56	41.5	63.5	88	35	51	61	29	30
AT1G02410	50.5	110.5	54	58.5	60	62.5	50.5	58	62.5	112	82.5	50.5	65.5	53	52.5	53	58.5	60.5	53	65.5	79	60	76	93	65.5	69.5	73.5	70.5
AT1G02420	0	0	2.5	1	1	0	0	0	0	0	0	0	0	1	3	3.5	1	1	2.5	0	0	1	0	0	0	1	10	0
AT1G02450	1	4.5	0	3.5	0	2	1.5	0	3	0	3	6	1	0	1	0	0	0	0	1.5	0	0	0	2.5	0	8	3	4.5
AT1G02460	32	35.5	32	35	41.5	41.5	34	48.5	60	37	35.5	13.5	34	30.5	29	21.5	25.5	20	22.5	38.5	52	43.5	37.5	49	9	20	29	27
AT1G02475	19.5	19.5	2.5	15.5	14.5	26.5	12.5	20.5	19	40.5	20	13.5	14.5	7	15.5	11.5	20	21	14.5	23.5	21.5	25.5	0	4.5	22.5	22.5	7.5	27
AT1G02500	3352	3053	3018.5	2780.5	2488	2684	3018.5	2780.5	2839	2684	2813	2813	3436.5	3352	3298.5	3547.5	3547.5	3547.5	3380	2733.5	2760	2711.5	3765	3018.5	2970	3298.5	3352	3124.5
AT1G02520	209	169.5	162.5	191.5	154	132.5	156.5	207	150	127	161.5	280.5	185	226	234	154	145	137.5	194.5	147	115	131.5	182	170.5	101.5	183.5	156.5	140.5
AT1G02530	2.5	0	0	2	0	0	3.5	5	3	0	0	6	3.5	0	1	1.5	4.5	2.5	1	0	4.5	1	0	0	5	1	0	0
AT1G02560	137.5	161.5	149.5	173	163.5	172.5	190.5	171.5	206	242	164	165	201.5	176.5	183	208	190.5	206.5	172	205.5	191.5	193.5	50	170.5	163.5	147	145	172.5
AT1G02610	10.5	6	0	6	12.5	6	0	3.5	2	40.5	0	9.5	5	3.5	2.5	7	6	6	6	7	2	7	50	6	0	8	7.5	2.5
AT1G02640	85.5	56	52	111	93	65.5	123.5	100	116	37	74	66.5	43	86	59.5	92	90.5	70	54	104.5	92	142.5	50	144	101.5	101.5	68.5	42.5
AT1G02660	15	35.5	24.5	28	31.5	35.5	23.5	34.5	41.5	37	12.5	66.5	13.5	22.5	21.5	15.5	20	20.5	14.5	21.5	27	23.5	26	9.5	9	24.5	10	27
AT1G02670	2.5	0	4.5	0.5	3.5	1	8	2	9	0	5	0	6	3.5	5	1	1	8	4.5	0	4.5	3.5	14.5	9.5	0	6	5	4.5
AT1G02680	43.5	31	22.5	44.5	23.5	32	49	20.5	50	33.5	20	34.5	37	42.5	33.5	35	45	38	30	22.5	47	41.5	50	37	27	20	39.5	27
AT1G02690	85.5	108	115.5	122	115	118.5	134.5	85.5	117.5	112	93	123.5	117	102	131.5	97.5	106.5	131.5	115	100.5	114	113	50	74	70.5	128.5	141.5	70.5
AT1G02700	1	2.5	2.5	0	2	2	8	2	1	0	7	0	0	6	2	1	2.5	2.5	4.5	1.5	1	1	0	0	9	0	0	0
AT1G02720	65.5	35.5	22.5	48	46.5	38.5	52	58	42.5	68.5	85	30	44.5	36.5	36.5	41.5	60.5	44.5	44	44.5	38.5	35	0	80.5	5	39.5	50.5	48
AT1G02730	148.5	89	118.5	192	173	193.5	180	171.5	163	145	120.5	97	117.5	153.5	142.5	117.5	146.5	123.5	121.5	139	156	183.5	62.5	111.5	122.5	146	97	125
AT1G02740	18	31	22.5	23.5	31	21	32	22.5	16.5	30	20	25.5	24	31	40.5	31	20	34.5	25	25.5	22.5	26	14.5	39	13.5	43.5	21	27
AT1G02750	37.5	21.5	20	42.5	37	54.5	24.5	16.5	41.5	22.5	25.5	21.5	37	25.5	28	32.5	43	38.5	21.5	34	29	32	76	17	27	16.5	23.5	40.5
AT1G02780	2021	1821	2606.5	2374	2374	2548	2813	2227	2374	2403.5	2374	2052.5	2367	2294.5	2390.5	2267.5	2524.5	2780.5	2390.5	2267.5	2407	2367	1788	2548	2760	2639.5	2760	2407
AT1G02810	107.5	96	61.5	34	33	32	41.5	48.5	61.5	50.5	71.5	50.5	52.5	83.5	80.5	43.5	51.5	60.5	54	45.5	42.5	34.5	76	47	41.5	87	94	40.5
AT1G02816	44.5	72	36.5	66.5	83	74.5	39	77	51.5	43.5	66.5	71.5	78	40.5	57	62	41.5	34.5	45.5	64.5	46	66.5	88	78	65.5	42.5	85	58.5
AT1G02840	460.5	462.5	533.5	358.5	353.5	466.5	461.5	349.5	428	406	377	476.5	415	396.5	384	433.5	410	498.5	420.5	414	462	438	443	459.5	434.5	421.5	484	418
AT1G02850	190.5	166.5	136	425.5	392	403	228.5	259	277	179	211.5	200	317	273	314	243	176	247	216.5	268.5	322	245	209	230	225	195.5	232	235
AT1G02860	32	21.5	32	21	23.5	33	14	18.5	24	7	12.5	38.5	36.5	26.5	31	28.5	39.5	24.5	31	32	21.5	34.5	0	13.5	36.5	32	45.5	32.5
AT1G02870	55	56	77	62.5	56	74.5	80.5	65.5	83.5	61.5	98.5	62	82	87.5	78.5	86	46.5	95	73	79	76	48	26	74	18	58	68.5	48
AT1G02880	161	172	123.5	143.5	121.5	91	108	130	116	175	106.5	138	199.5	155	177	176	164.5	174	187	151	102	118.5	182	78	65.5	115	138	151
AT1G02890	418.5	539	439	258	313	317	286	338.5	333	284	382.5	418	246	342	337	241.5	340	281	317.5	304	301	306	240	339	399.5	332	381	433.5
AT1G02900	282	290.5	188	162	161.5	156	179.5	234	143.5	151.5	164	243	284	217.5	177	216.5	241.5	218.5	223	157.5	152	150.5	240	142	203.5	261	203.5	179
AT1G02910	42	15	36.5	42.5	44.5	44.5	49	44.5	39.5	61.5	33.5	66.5	39.5	37	44	47	55	45.5	46.5	48	49.5	49.5	26	49	27	46.5	48	51
AT1G02920	495	836.5	432	167.5	232.5	130.5	174.5	445.5	211.5	291.5	442	725	77	66.5	115	214.5	132.5	238.5	305.5	370.5	220.5	364.5	377	282	208	335	365.5	542.5
AT1G02930	165.5	297	220.5	165	269.5	108	102.5	214.5	146	147.5	141.5	360	28.5	31	50	112	87	113	137	216.5	182.5	277	282	165.5	106.5	137.5	156.5	200
AT1G02960	67.5	49.5	79.5	61.5	56	64	82	54	59	127	61.5	21.5	68.5	64.5	60	69.5	63.5	90	78	74	70	65.5	76	82.5	56	59	62.5	56
AT1G02970	10.5	8.5	15	10.5	14.5	6	12.5	18.5	11.5	10	25.5	25.5	5	6	11.5	11.5	9	10.5	5.5	10.5	17	11.5	14.5	9.5	5	8	5	9.5
AT1G02980	0	6	0	0.5	3.5	2	4.5	2	4.5	0	9.5	17.5	0	1	3	3.5	0	2	1	1.5	0	1	0	0	0	2.5	0	0
AT1G02990	70.5	74.5	47.5	76	77	65.5	40	42.5	59	127	66.5	84	53	58	51.5	60	48.5	56	72.5	81	75	64	153	64.5	106.5	55	68.5	83
AT1G03000	114	103	77	69.5	74	89	65.5	102	94	76	71.5	115	48.5	82	75	70.5	91	82	93	75	83.5	84.5	127.5	69.5	36.5	87	56	80
AT1G03010	13.5	26.5	24.5	10.5	12.5	16	12.5	18.5	22.5	30	9.5	62	9.5	22.5	13.5	21	25.5	11.5	17	17.5	15.5	25.5	14.5	15	5	27.5	21	30
AT1G03030	55	51.5	36.5	64	77	80.5	55	60	47.5	40.5	74	58.5	63.5	59.5	52	59	46.5	53	56	55	65.5	42.5	50	64.5	65.5	90	50.5	67.5
AT1G03040	172.5	149.5	210	226	197	199.5	182.5	163	183	167	155	220.5	194.5	170.5	164	193.5	153	181	158.5	188	194.5	209	140.5	124.5	168.5	117.5	147.5	191.5
AT1G03060	263.5	245.5	225	241.5	247	251	205.5	239.5	225	368	285	196	126	246	223	172	225	206.5	223	230.5	230.5	206.5	225	233.5	219.5	263.5	289.5	191.5
AT1G03070	5	4.5	4.5	6	10	6	6	9	6.5	7	3	6	10.5	8.5	4	7	2.5	4.5	5	8	4.5	11.5	0	33.5	0	0	12.5	16.5
AT1G03080	470.5	442.5	436	431.5	488.5	411.5	333	448	414.5	291.5	540.5	436	338.5	420.5	408	287	334	297.5	397	416.5	425	434	517	425.5	344.5	435.5	357.5	488.5
AT1G03090	101	142.5	61.5	117.5	110.5	136.5	121.5	124	95	175	77	150.5	58.5	99.5	91.5	85.5	116.5	102	76.5	128.5	97.5	109	50	154	101.5	113	102.5	78
AT1G03100	3.5	0	0	0.5	0	0	3.5	9	3	0	0	0	4.5	4.5	1	2	4.5	1	6	2.5	4.5	3	0	6	5	1	0	2.5
AT1G03110	64	56	65.5	42.5	54	57	63.5	54	56	37	56	46.5	56	68.5	62	50.5	50	82	57	39.5	49.5	42.5	14.5	53	32	51.5	56	35
AT1G03130	10.5	2.5	4.5	10	3.5	10.5	8	5	8	0	0	17.5	9.5	6	2.5	9.5	10.5	7	2.5	13.5	9	9	37.5	2.5	5	5	3	9.5
AT1G03140	161	145	145	135	173	146	158.5	140.5	143.5	61.5	106.5	88	162	168	140	135	132.5	130.5	134	143.5	133.5	122.5	167.5	147.5	212.5	161	141.5	100
AT1G03150	53.5	29	29	34	40.5	24.5	27.5	34.5	36.5	37	22.5	25.5	34.5	41.5	46.5	32	33.5	49.5	33	34.5	34	41.5	0	35	18	32	26	40.5
AT1G03160	72.5	31	40.5	40.5	39.5	44.5	51.5	42.5	44.5	50.5	38	21.5	32	54	36.5	40	55	40.5	38.5	43.5	44.5	43.5	76	37	51	36.5	23.5	16.5
AT1G03180	18	22	17	23.5	13.5	17	14	16.5	16.5	19.5	12.5	9.5	17.5	18	17	22.5	14	17	17.5	19	14.5	15.5	0	25.5	36.5	22.5	15.5	19.5
AT1G03190	56	51.5	74.5	55	67.5	57	39	36.5	39.5	33.5	40.5	75	43	60.5	56	26.5	33.5	41.5	54	48.5	53.5	56	37.5	99	61	43.5	29	64
AT1G03200	8	0	0	4.5	1	4.5	0	7	3	16	3	13.5	0	0	0	1.5	0	1	1	0	4.5	3.5	0	17	5	1	3	11.5
AT1G03210	156	110.5	140.5	142.5	136.5	130.5	127	126	107	90	138	196	131.5	132.5	131.5	143	137.5	152	123.5	127.5	112	120.5	50	122.5	137.5	118	85	97
AT1G03220	1366.5	1030	875.5	1194	1260	868.5	966	1393.5	988	1187	974	1330	1369	1369	1481.5	1244	933.5	771.5	958.5	1324.5	1012.5	1014	1143	1165	679.5	790	758.5	999.5
AT1G03230	109	149.5	136	152	110.5	132.5	156.5	119.5	130.5	101.5	138	168.5	155	165	180	166.5	145	193	122.5	116.5	154	118.5	26	76	158.5	113	145	125.5
AT1G03250	64	82	61.5	68.5	66.5	67.5	49	52.5	66.5	127	59	46.5	83	62	62.5	78.5	70.5	68.5	68.5	79	77	69.5	62.5	59	46	53	79	48
AT1G03260	19.5	17	38.5	42.5	34	27.5	26.5	38.5	9	58	20	21.5	27.5	32	26	28	25.5	25	26.5	34	23.5	18.5	0	23.5	13.5	10.5	39.5	32.5
AT1G03270	6.5	13	13.5	11.5	16	12	19.5	14.5	8	22.5	7	17.5	16	13.5	17	11.5	6	14.5	13.5	10.5	20.5	11.5	37.5	11.5	13.5	21.5	21	7
AT1G03280	131.5	149.5	109	101.5	94	113	92	90	116	98.5	187	179	130.5	144	116.5	97.5	110	98.5	111	117.5	110	123.5	62.5	158.5	101.5	118	131.5	179
AT1G03290	144	89	111	115	123.5	141	83.5	140.5	118.5	137	95.5	115	95.5	92	112.5	83.5	97.5	85.5	102	107.5	110	115.5	240	144.5	96	103	168.5	103
AT1G03310	19.5	19.5	17	34.5	39.5	44.5	30	14.5	30	86.5	7	25.5	34	28	33.5	30	32	27	33	38	36.5	39.5	14.5	21.5	22.5	36.5	34.5	32.5
AT1G03330	100	103.5	67.5	114	83	96.5	95	48.5	88	90	77	97	109.5	66.5	78	80	132.5	107	110.5	103	103.5	101.5	113.5	45.5	96	92	29	114
AT1G03340	3.5	31	15	5.5	6	3.5	4.5	7	6.5	0	0	6	7.5	4.5	8	6	14	7	13.5	5.5	7	1	26	4.5	9	8	3	14.5
AT1G03350	166	185	173	150.5	166.5	121	157.5	191.5	130.5	182	184.5	175	136.5	164	165	160	190.5	133.5	149	137.5	156	167.5	240	152	101.5	159	145	108
AT1G03360	16.5	49.5	49.5	50	42.5	47.5	50.5	46.5	42.5	40.5	28	47	44.5	53	54	45.5	43	46.5	41.5	40.5	50.5	42.5	100.5	31	70.5	36.5	32	38
AT1G03365	55	67.5	56	57	72	62.5	67	46.5	47.5	54	71.5	13.5	60.5	58.5	51.5	53	62	55	58.5	65.5	60.5	77.5	50	89	61	56	45.5	35
AT1G03370	116.5	140	131.5	115	104.5	96.5	91	114	132.5	83.5	112	150.5	63	102	93	77	79.5	79	99.5	105.5	101.5	108	127.5	63	148	115	88	136.5
AT1G03380	185	175	111	134	146	110	131.5	168.5	157.5	182.5	150.5	254	119.5	161.5	177	165	170	142.5	173.5	164	136	159.5	167.5	161	148	172.5	165.5	156.5
AT1G03400	10.5	15	10.5	2.5	5.5	3.5	2.5	3.5	2	30	0	6	2.5	5.5	3.5	5.5	0	6	5.5	2	5.5	2	14.5	2.5	5	5	0	7
AT1G03410	2.5	2.5	0	1	1	0	2.5	2	1	0	3	0	0	3	3	1.5	0	2.5	3.5	1	1	0	0	2.5	13.5	1	3	7
AT1G03430	59.5	63	40.5	42.5	48	39.5	27.5	36.5	41.5	61.5	114.5	42.5	34.5	36	36	37	48.5	61.5	51	49	62	55	37.5	57	51	46.5	99.5	70.5
AT1G03440	30	22	6	10	21.5	12	14.5	20.5	30	0	17	30	15.5	22.5	24.5	25.5	15	21	17	9	20	12.5	14.5	23.5	13.5	5	10	7
AT1G03457	34.5	31	36.5	53	39.5	43.5	67	44.5	46	98.5	56	50.5	56	64.5	54	68.5	33.5	49	55	53.5	46	34.5	37.5	78	91	42.5	45.5	24.5
AT1G03470	2.5	6	13.5	12.5	19.5	9.5	12.5	5	15	12.5	9.5	21.5	12.5	14	9	13.5	15	19	13.5	10.5	19	15.5	37.5	4.5	9	5	15.5	7
AT1G03475	55	89	74.5	73	74	90	90.5	63.5	106	37	88	101.5	81	108	81	77	127	85.5	70.5	92.5	98.5	111.5	26	103	46	105	88	116.5
AT1G03495	13.5	6	22.5	7	14	4.5	11.5	32	28	0	22.5	9.5	11.5	15	9.5	7	7	14.5	5.5	9	19	16	14.5	15	9	9	7.5	11.5
AT1G03510	3.5	4.5	0	3.5	1	6	3.5	3.5	3	0	5	0	2	3.5	0	2.5	1	3.5	3.5	2.5	0.5	1	0	0	0	6	3	4.5
AT1G03520	46.5	38	42.5	49.5	37	59	37.5	38.5	40.5	83.5	40.5	13.5	41.5	29.5	27.5	43.5	29	29	40.5	40.5	37.5	46.5	37.5	45.5	32	92	42.5	30
AT1G03530	59.5	47	72.5	50	56	50.5	83.5	44.5	51.5	33.5	33.5	71.5	50	67.5	59.5	55	51.5	60.5	63.5	47.5	62	49	37.5	41.5	85.5	59	34.5	67.5
AT1G03540	6.5	10.5	10.5	2.5	1	4.5	4.5	0	3	22.5	0	0	2.5	0	2	0	9	2.5	3.5	5.5	2	2	0	9.5	9	3.5	5	0
AT1G03550	16.5	29	20	10.5	14	10.5	9	24.5	12.5	37	25.5	6	33.5	10	13	22.5	12.5	22.5	15.5	9.5	7	5.5	14.5	4.5	0	6	32	11.5
AT1G03560	16.5	29	13.5	15	27.5	22.5	13	14.5	18	16	9.5	13.5	19.5	23.5	24.5	15.5	23.5	26.5	28	21.5	21.5	26	26	29	22.5	12.5	18	16.5
AT1G03590	79.5	72	113	119.5	102	90	129.5	95.5	103.5	109	117.5	62	105.5	94	93.5	94	67.5	97	93	106.5	82.5	90	26	39	106.5	84	85	75
AT1G03600	2.5	22	10.5	16	23.5	13.5	21	16.5	32	12.5	15	25.5	11.5	21	14	14.5	20	13.5	14.5	29.5	18	32	37.5	6	27	5	7.5	7
AT1G03610	58	44.5	65.5	68.5	55	68.5	82.5	40.5	55	37	69.5	50.5	40.5	49	49.5	43.5	63.5	51.5	46.5	71.5	58	92.5	167.5	55	85.5	51.5	37	51
AT1G03620	12.5	4.5	13.5	21	23.5	43.5	18.5	18.5	14	10	12.5	17.5	24	23.5	31	26.5	23.5	32	24.5	25.5	36.5	18	14.5	19.5	5	16.5	21	14.5
AT1G03630	15	29	20	21	17	32	20	30.5	28	12.5	7	17.5	20.5	20	12.5	10.5	21.5	14.5	18	28	30	22.5	0	23.5	9	13.5	18	22
AT1G03650	3.5	4.5	24.5	2.5	2	4.5	5.5	10.5	4.5	0	20	30	3.5	6	3	5	6	5.5	5.5	5.5	1	2	0	0	0	12.5	3	0
AT1G03660	1	6	2.5	1	2	1	0	7	0	19.5	17	0	3.5	6	2.5	0	2.5	2.5	1	1.5	0	5.5	0	0	0	8	3	2.5
AT1G03680	53.5	17	20	32	25.5	35.5	29	20.5	38	30	22.5	9.5	39.5	25.5	28	35	30	40.5	31	43.5	40.5	25.5	14.5	23.5	22.5	26	26	30
AT1G03687	40.5	29	34	30	39.5	37	55.5	26.5	39.5	50.5	22.5	17.5	45.5	41.5	47.5	30	27	55.5	49	36	41	21	14.5	33.5	46	33.5	56	30
AT1G03700	32	38	29	9	11.5	4.5	17	26.5	11.5	22.5	7	30	33	30	21.5	33	21.5	37	34	15	8	5.5	37.5	31	56	22.5	26	16.5
AT1G03730	37.5	22	22.5	27	29	32	35	26.5	25.5	19.5	31	9.5	23.5	38	30.5	42.5	23.5	36.5	28	25.5	37.5	28.5	14.5	19.5	9	32	23.5	42.5
AT1G03740	183.5	134.5	86.5	84	84.5	87	77	148.5	103.5	83.5	106.5	97	119.5	103.5	132.5	130.5	126	112.5	169.5	111	89	89	50	115.5	41.5	111.5	123.5	143.5
AT1G03750	25.5	24.5	52	37	40.5	27.5	27.5	24.5	35	68.5	38	9.5	23.5	32	37	28	29	30	38.5	35	32	42.5	0	25.5	32	39.5	32	14.5
AT1G03760	13.5	13	4.5	26.5	26.5	33	33	28.5	16.5	12.5	20	38.5	27.5	24.5	19	32	17	27.5	35	29	40.5	31	37.5	31	27	13.5	34.5	19.5
AT1G03770	24.5	31	17	36	29	38.5	35	18.5	28	16	56	47	21.5	26.5	26	29	32	32	26.5	36.5	31	32	26	15	9	46.5	15.5	22
AT1G03780	19.5	19.5	52	65.5	56	56	51.5	54	49	90	51	50.5	40.5	59.5	50.5	49.5	41.5	39.5	41.5	45.5	48.5	48	50	49	56	53	68.5	38
AT1G03820	53.5	56	89.5	115	90	134	101	94	78	87	85	115	152	111.5	111	140.5	188	113	109.5	99.5	99.5	95	50	107	148.5	77.5	97	80
AT1G03830	40.5	24.5	32	31	45	41.5	45.5	18.5	34	16	38	38.5	39	49	39.5	32.5	41.5	31	35	43.5	45.5	33	26	33.5	46	40.5	56	40.5
AT1G03840	82.5	84	99	30	17	37	33.5	18.5	36.5	54	20	66.5	57	62.5	44	53	41.5	44.5	67.5	25.5	36	22.5	76	21.5	22.5	67.5	79	105.5
AT1G03850	115.5	112.5	56	64	34.5	37	46	54	35	12.5	90	42.5	55	54	61	68.5	46.5	54	49	51	39.5	62.5	88	39	80.5	67.5	42.5	72.5
AT1G03860	168.5	199.5	210	249	225	246	261.5	228.5	215.5	130.5	203	182.5	231.5	259	262	227.5	255	269.5	225	194.5	217	184.5	127.5	161	193.5	206.5	185.5	194.5
AT1G03870	396.5	339.5	373	210.5	214.5	180	356	291.5	338.5	307.5	305.5	308.5	540.5	452.5	461.5	567	439	394	479	308.5	237.5	245	323.5	226	168.5	318.5	277	378
AT1G03900	273	263	373	364.5	344.5	295	352.5	361.5	362.5	352	241	288.5	337.5	325	335.5	348	273	375.5	333.5	382	349.5	327	153	459.5	260	339	296	217
AT1G03905	39	40.5	45.5	61.5	50	53	59.5	42.5	66.5	83.5	43.5	42.5	52.5	48.5	57	52.5	38.5	51.5	64.5	44.5	38.5	52	50	39	46	42.5	53.5	45.5
AT1G03910	137.5	177	157	192	219.5	190	209.5	191.5	158.5	90	234.5	212	153	192.5	147.5	156	178	174	166.5	171.5	177	190	127.5	99	148.5	235	213.5	200
AT1G03920	53.5	56	49.5	29	32	19.5	47	44.5	35	72	54	25.5	34	27	37	39.5	33.5	28.5	42.5	32	33	44.5	37.5	69.5	18	63.5	32	56
AT1G03930	86.5	114.5	84.5	95	84.5	115.5	105.5	71.5	107	90	114.5	84	75	77	90	95.5	121.5	91.5	89	91.5	73.5	102.5	62.5	80.5	46	76	65	83
AT1G03940	15	24.5	17	10	12.5	12	12.5	10.5	12.5	0	7	0	14	8.5	10	11.5	12.5	13.5	12.5	19	19	18.5	0	4.5	22.5	10.5	0	14.5
AT1G03950	34.5	49.5	29	37	36	39.5	35	20.5	35	16	22.5	71.5	60.5	51.5	55	49.5	50	38.5	52.5	43.5	37.5	40.5	26	47	56	42.5	23.5	58.5
AT1G03960	28.5	40.5	29	42.5	40.5	41.5	57	32	57.5	72.5	48.5	50.5	33.5	39.5	35.5	37	55	60.5	30	43.5	41.5	42.5	37.5	78.5	51	42.5	76.5	64
AT1G03970	22.5	24.5	10.5	25	23.5	44.5	18	34.5	15	50.5	15	25.5	35	29	26.5	37.5	33.5	22.5	24.5	29	16	34.5	0	17	9	31	15.5	9.5
AT1G03980	5	6	6	2.5	1	1	0	0	5.5	7	5	0	0	2	6	2.5	4.5	2.5	5	0	0.5	7	0	2.5	5	1	3	0
AT1G03990	8	17	6	10.5	11.5	1	24.5	9	12.5	26	17	6	14	12.5	12.5	14	12.5	13.5	22.5	8	12.5	6	0	4.5	0	9	7.5	9.5
AT1G04000	36	38	27	22.5	16	23.5	26.5	18.5	25.5	12.5	9.5	38.5	44.5	29	19	39.5	17	32	21.5	15.5	27	16	0	39	9	6	32	30
AT1G04010	72.5	77	59	66.5	72	67.5	42.5	67.5	55	80	74	25.5	35	60.5	52.5	50	58.5	49.5	64.5	54.5	59	54.5	26	61	51	55	62.5	61
AT1G04020	37.5	29	32	37.5	35	43.5	43.5	28.5	30	19.5	31	34.5	26	34	39.5	35	51.5	35	25	38.5	46	44.5	26	25.5	18	48	32	32.5
AT1G04030	40.5	38	42.5	28	32	34.5	46	54	35	83.5	33.5	75	39	35	38	37.5	17	36.5	29	47	36	44.5	14.5	63	18	40.5	21	45.5
AT1G04040	141	199.5	133.5	139.5	166.5	96.5	199.5	138	231	226	181.5	294	137	180	188	176	199	155.5	170	181	145	166	269.5	165.5	91	241.5	156.5	146
AT1G04050	21	29	52	31	29	32	32	24.5	25.5	30	28	34.5	23.5	21	26.5	24.5	9	28.5	37	35	31	26	0	6	0	22.5	18	19.5
AT1G04070	22.5	15	17	28.5	24.5	21	25	21	26.5	33.5	17	6	27	30.5	21.5	17	21.5	27	15	16	17	15.5	100.5	13.5	5	13.5	42.5	22
AT1G04080	394	362.5	336.5	403	348	363.5	416.5	343.5	356	498	319.5	590	268.5	363	384	332.5	353.5	450	429	373	423	342.5	563.5	329	457.5	409	403	404.5
AT1G04090	2.5	0	4.5	5.5	2.5	2	3.5	2	1	7	0	9.5	2.5	0	3.5	3.5	6	2.5	1	3.5	4.5	4.5	0	0	9	3.5	3	4.5
AT1G04100	5	6	0	10	6	12	7	9	2	7	9.5	9.5	3.5	7	5	8.5	7	6	13.5	6	4.5	7	26	0	5	20	5	11.5
AT1G04107	10.5	2.5	2.5	4.5	5.5	7	1.5	12.5	4.5	16	17	0	4.5	0	5	2.5	7	8.5	6	2.5	4.5	3.5	0	19.5	5.5	6	3	2.5
AT1G04120	629.5	591	636.5	697	722.5	734	493	685	698	788.5	640	558.5	337.5	467	499	376	500.5	447	547.5	596.5	527	636.5	474.5	615.5	665	666	744.5	689.5
AT1G04130	25.5	26.5	49.5	34	34	47.5	47	26.5	44.5	16	54	38.5	33	38.5	30	34	30	51.5	43.5	36	47	40.5	14.5	84.5	56	26	29	32.5
AT1G04140	377.5	356	345.5	356	354	379.5	323.5	359	378.5	255.5	399.5	284.5	273	410.5	382	317.5	400	368	370	418	408	337	282	385	474	411.5	377	305
AT1G04150	1	0	4.5	0.5	8	4.5	2.5	5	3	0	0	0	0	2	4	0	1	4.5	5	3.5	3.5	0	0	0	0	6	5	2.5
AT1G04160	62.5	47	49.5	43.5	48	46	32	52.5	59	22.5	51	58.5	36.5	51.5	46	51.5	29	49	58	50.5	47	67.5	50	45.5	51	67.5	45.5	97
AT1G04170	354	335.5	350.5	348	345	350.5	388.5	275.5	350.5	505.5	294	259	351.5	377	365.5	306.5	400.5	414.5	376.5	344	356	343	269.5	279.5	438.5	426	387.5	370.5
AT1G04180	25.5	13	13.5	19	14	38.5	24.5	24.5	29	0	12.5	6	30	25	20.5	22.5	25.5	13.5	28	14.5	28	15.5	0	17	18	12.5	10	16.5
AT1G04190	128.5	114.5	120.5	92	136.5	113	127.5	111.5	125	112	79.5	115	121.5	113	127.5	130.5	118	137.5	142.5	113	110	135	50	142	101.5	115	108	159
AT1G04200	179	164	154	128.5	179	164.5	146	150.5	178	182.5	155.5	179	104	108	145	146	153	142.5	154	155	148.5	155	167.5	150	117.5	167.5	242	100
AT1G04210	189	208.5	216.5	212	189	220.5	171.5	184.5	172.5	250.5	211.5	133	128.5	179	185.5	151	179	190	172.5	206.5	205.5	202	88	227	179	287.5	194.5	264.5
AT1G04220	61	82	96.5	46.5	52	62.5	59.5	69.5	71.5	19.5	90.5	47	155	76.5	55	95	153.5	91	84.5	48.5	45.5	54	88	61	70.5	40.5	45.5	30
AT1G04230	47.5	19.5	49.5	34.5	38.5	27.5	36	28.5	29	16	45.5	42.5	50	55	47	52	32	48	38	29	29	41.5	100.5	41.5	27	27.5	32	9.5
AT1G04240	100	132.5	82	53	42.5	73.5	72.5	73.5	79.5	112	129.5	101.5	38	38	30.5	43.5	70.5	29	34	52	52.5	94	50	47	106.5	61	65	111
AT1G04250	555.5	465	465	255	319.5	275	403.5	334	359.5	377	399.5	386	424.5	392.5	360.5	376.5	364.5	307.5	334	312.5	277	380	488.5	391	453.5	433.5	433.5	457.5
AT1G04260	42	54	56	42.5	34	27.5	54	40.5	55	65	20	47	73	62	41.5	53	29	53	62	46.5	39.5	27.5	62.5	33.5	22.5	45	18	32.5
AT1G04270	1002.5	842	1218.5	1314	1147	1290.5	1360	1013	1166.5	963	1290.5	1108.5	1187.5	1011.5	1108.5	1135.5	1181.5	1411.5	1187.5	1148	1143	1252	994	1208.5	1214	1210.5	1297.5	1214
AT1G04280	302	403	241.5	186.5	197	197	178	242	205	267.5	322.5	329.5	399.5	323	330.5	394	342.5	291	350.5	224	199	219.5	462.5	240.5	271	349.5	335	380.5
AT1G04290	2.5	0	0	0	1	3.5	0	2	3	7	0	0	1.5	2	1	2.5	4.5	2.5	2	0	0	0	0	4.5	0	0	10	4.5
AT1G04300	322	394	373	308.5	298.5	334	298	315	284	197.5	263	304	226	308.5	301	270.5	267.5	297.5	307.5	294	257	300.5	225	275	266.5	321.5	347.5	286
AT1G04310	25.5	4.5	22.5	24.5	20.5	23.5	22.5	24.5	24	26	40.5	9.5	15.5	16.5	12.5	14.5	27	21	18	21.5	22.5	25.5	0	6	13.5	9	5	14.5
AT1G04330	19.5	0	4.5	3.5	3.5	17	6	21	9	0	0	0	16	11	7	14.5	15	16.5	11.5	5.5	9.5	2	0	0	0	5	5	7
AT1G04340	111	98.5	96.5	103.5	91.5	100.5	121.5	111.5	119	127	96	138	127.5	121.5	102	95	127	131.5	114	104.5	103.5	76	88	71.5	112.5	121.5	145	106
AT1G04350	24.5	8.5	24.5	1	5	3.5	9	9	11.5	26	15	9.5	14.5	6	13.5	14	9	11.5	12.5	14	7	11.5	0	11.5	13.5	6	26	11.5
AT1G04360	37.5	56	59	55.5	49.5	54.5	54	58	60	105	61.5	25.5	81.5	98	54	65.5	48.5	56	56	43.5	43.5	54.5	26	57	27	36.5	37	40.5
AT1G04390	44.5	42.5	32	30	24.5	27.5	37.5	31	29	72.5	33.5	47	31	56	40.5	32.5	29	36	43.5	48	29	38.5	26	49	27	43.5	56	51
AT1G04400	235.5	259	214.5	223.5	266.5	194.5	205	275	218.5	163	184.5	203.5	194.5	217	219.5	207	214	174	182.5	248	221	254.5	182	275	188.5	222	129.5	189.5
AT1G04410	3018.5	3018.5	3298.5	3380	3298.5	3053	3215.5	2970	3053	3018.5	2970	3018.5	2970	3053	3215.5	2862	2970	3352	2970	3436.5	3352	2970	3053	3352	3352	3215.5	3298.5	3352
AT1G04420	19.5	33.5	17	19.5	17	14.5	21	21	8	30	3	17.5	11.5	10	14.5	19.5	9	13.5	18	16	13.5	9	0	17	5.5	22.5	15.5	14.5
AT1G04425	10.5	0	4.5	12.5	7	26.5	8	3.5	6.5	10	3	0	10.5	10	5.5	5	2.5	8	5.5	3.5	10	7	0	15	9	1	12.5	16.5
AT1G04430	350.5	292.5	405.5	309.5	311.5	305.5	373	284	350.5	300	311.5	272	316	317	321.5	313	325.5	357.5	344.5	334	365.5	318.5	488.5	309.5	320	394	388	363.5
AT1G04440	332.5	331	298	305.5	331	343.5	286	332.5	327	362.5	291.5	341.5	332.5	299.5	320.5	350.5	273	336	350.5	322.5	294.5	337	443	322.5	287	332.5	306.5	356
AT1G04480	251	263	279.5	304	332.5	315	377	328.5	300	284	337	165	440.5	294.5	326.5	368	296.5	472	291	293	331.5	337.5	196	326	260.5	291.5	366	342.5
AT1G04490	10.5	22	4.5	23.5	31.5	26.5	7	18.5	24	7	9.5	17.5	22.5	25.5	16	14.5	17	10	8	15.5	10.5	12.5	0	7.5	22.5	20	23.5	7
AT1G04510	163.5	248	233.5	223.5	205	205	192	198	189	255.5	138	123.5	166.5	190	213.5	222	192.5	225	198.5	192.5	216.5	199	153	192.5	255	151	210.5	168.5
AT1G04520	43.5	31	59	54	54	53	30	44.5	59	72.5	38	58.5	54	45.5	58	48	53.5	72	59	49	55.5	40.5	37.5	69.5	46	67.5	56	75
AT1G04530	82.5	112.5	56	70.5	70.5	84.5	76.5	79	84.5	65	74	66.5	91	94	89	70.5	63.5	71.5	83	81	69.5	87	14.5	64.5	56	105	94	80
AT1G04540	25.5	33.5	32	17.5	23.5	21	18	21	25.5	10	31	17.5	19	26.5	23.5	20	25.5	22	20.5	23.5	21.5	25.5	14.5	13.5	27	12.5	42.5	11.5
AT1G04550	61	94	65.5	44.5	52	59	47	46.5	41.5	51	33.5	75	55	55	52	45.5	68.5	44.5	57	36	44.5	56	62.5	41.5	56	53	45.5	64
AT1G04555	42.5	15	17	25	13.5	19.5	17	10.5	16.5	22.5	7	9.5	14	21.5	11.5	20.5	21.5	15.5	20	20.5	11.5	18.5	0	4.5	32	15	32	14.5
AT1G04570	10.5	4.5	6	11.5	7	10.5	5.5	7	12.5	0	3	21.5	9.5	3	4.5	12.5	4.5	12.5	12.5	8	9.5	9.5	0	2.5	5.5	10.5	23.5	4.5
AT1G04590	47.5	77	77	64	62.5	52	59	81.5	101	54	51	42.5	63	65.5	64.5	67.5	70.5	69.5	50.5	78	76	61	88	65	70.5	82.5	65.5	45.5
AT1G04600	2.5	0	0	4.5	5	6	2.5	2	0	0	7	0	4.5	4.5	2.5	3.5	1	2.5	5.5	3.5	7	3.5	0	6	9	6	7.5	4.5
AT1G04610	15	24.5	24.5	26.5	19	13.5	33.5	18.5	22.5	16	12.5	25.5	26	20	18	22.5	22	13.5	14.5	28.5	25.5	18	50	27.5	9	10.5	53.5	9.5
AT1G04630	62.5	79	59	94	87.5	59	102.5	79.5	77	37	28	75	126	94	75.5	83.5	76	94	89	79	77	74.5	37.5	69.5	65.5	56	53.5	38
AT1G04635	1	10.5	8.5	12.5	2	4.5	5.5	10.5	0	0	0	0	6	1	3	8.5	2.5	7	6.5	5.5	7	3.5	0	2.5	5.5	10.5	0	4.5
AT1G04640	6.5	2.5	2.5	13.5	15.5	10.5	9	7	10.5	0	5	6	15	7.5	8	10.5	7	7	13.5	8	12.5	8	14.5	17	22.5	5	15.5	4.5
AT1G04650	13.5	8.5	27	9.5	10	14.5	9.5	9	5.5	26	0	0	9.5	12.5	11.5	6	6	9.5	12.5	10	7	7	37.5	11.5	5.5	8	26	11.5
AT1G04680	260	217.5	326	294	296.5	408	349.5	275.5	338.5	453	329	243	349.5	366	319.5	389.5	364.5	352	348.5	318.5	396.5	350.5	309.5	369	283	332.5	347.5	290.5
AT1G04690	294	261	326.5	312	331.5	375	351.5	295.5	352	315	285.5	179	293	269.5	272.5	304	297	321.5	291	292	317	286	240	282	399.5	275	267.5	335
AT1G04700	13.5	19.5	20	9.5	9.5	8	10	32	16.5	12.5	20	42.5	16.5	8.5	21.5	16	12.5	11.5	14.5	12.5	9	11.5	14.5	13.5	0	18	5	24.5
AT1G04710	52	54	29	29	30	35.5	35	28.5	42.5	26	33.5	38.5	38	34	42.5	31	39.5	39.5	33	34.5	30	21.5	37.5	57	9	36.5	42.5	14.5
AT1G04730	33	29	29	26.5	27	22.5	9	40.5	36.5	34	12.5	38.5	15	21.5	27.5	20	9	38	32	25.5	27	23.5	0	21.5	13.5	24.5	42.5	14.5
AT1G04750	221	313.5	241.5	267.5	287.5	313.5	262.5	258	275	295.5	217	280.5	267.5	289.5	265.5	230.5	241.5	294.5	265.5	282	273	267.5	100.5	320	291	213.5	274	262.5
AT1G04760	2.5	13	8.5	9.5	14	6	10.5	9	8	0	5	9.5	9	5.5	16	6	12.5	13.5	11.5	10.5	9	9	14.5	17	0	6	7.5	0
AT1G04770	76.5	86.5	77	103.5	119.5	73.5	80.5	69.5	104.5	68.5	98.5	84	95	90	68.5	78.5	70.5	62.5	64.5	85	118.5	106	76	57	61	63.5	53.5	45.5
AT1G04778	5	0	2.5	7	5	6	9	9	6.5	7	12.5	0	7	7	1	3.5	3	2.5	2.5	4.5	5.5	7	0	2.5	9	2.5	5	11.5
AT1G04780	139.5	189	188	189	195.5	173	202.5	191.5	160	201.5	161.5	179	169.5	175	208	150.5	143	118.5	149.5	168.5	156	164	182	152	179	183.5	159.5	148.5
AT1G04790	64	63	56	68.5	75	41.5	65.5	76	66.5	61.5	93	62	53.5	55	51	56	38.5	57	70.5	69.5	64.5	68.5	88	67.5	76	88.5	50.5	83
AT1G04810	378.5	285.5	396	402	370.5	332.5	362.5	351.5	325.5	358	368	243	271	337.5	339	307.5	371	287	282	394	342.5	331.5	324	259	231	306.5	277	308.5
AT1G04820	1391.5	1566.5	1647.5	1537.5	1481.5	1701	1779.5	1666.5	1779.5	1385	1655.5	1385	1583	1647.5	1804.5	1692.5	1554	1821	1856	1526	1669	1405.5	1025.5	1621	1588	1692.5	1498	1393.5
AT1G04830	64	60.5	70.5	78	84.5	95	92	92	85.5	43.5	82.5	21.5	66.5	91	91.5	70.5	85	92.5	74.5	79.5	73.5	100	127.5	80.5	107	71.5	76.5	64
AT1G04840	1	0	0	2.5	2	1	4	2	3	0	5	0	7	1	1	1	3	2.5	5.5	1.5	0	3	0	6	0	1	5	11.5
AT1G04850	386.5	481	404	523.5	484	551	542.5	498	443.5	522	547.5	509	519.5	481.5	508	517.5	496	444	434	474	496	431.5	282	440	497.5	401	469	352.5
AT1G04860	97	94	111	86.5	91	80.5	97	115.5	99.5	65	74	110.5	60.5	111	111.5	72.5	85	88	101	89	112	106	153	87	112.5	115	105.5	134
AT1G04870	105.5	142.5	167.5	141.5	133.5	159	145	108	136.5	175	109	119	137.5	113	148.5	131.5	137.5	166	127.5	138.5	134.5	138	167.5	182	117.5	139.5	162.5	157
AT1G04880	0	0	2.5	0	0	4.5	9	5	0	0	0	0	0	0	3	1	0	0	2.5	0	5.5	0	0	0	0	1	0	2.5
AT1G04900	18	35.5	20	37.5	39.5	30	30	28.5	28	0	12.5	6	21.5	36	38	40.5	23.5	38.5	24.5	27	33	38	50	35	22.5	42.5	53.5	51
AT1G04910	79.5	79	131.5	115.5	77.5	107	121.5	87.5	119	94	93	71.5	92.5	89.5	91	105	101.5	92	96.5	97	112	100.5	127.5	89	102	111.5	88	103
AT1G04930	6.5	4.5	22.5	7	13.5	7	9	5	2	0	20	9.5	11.5	14	7	9	4.5	10	13.5	12.5	5.5	8	14.5	4.5	0	9	21	14.5
AT1G04945	21	29	8.5	21	26	24.5	18.5	14.5	9	65	45.5	0	19.5	28	27.5	29	25.5	31	20.5	22.5	25.5	13.5	37.5	25.5	32	38	23.5	19.5
AT1G04950	71.5	84	49.5	70.5	62	52	47	76	83.5	40.5	69.5	58.5	71.5	58.5	59.5	73.5	53.5	72.5	69	64.5	74	55	62.5	61	76	97	68.5	48.5
AT1G04960	101	110.5	84.5	61.5	73	65.5	61.5	71.5	85.5	72.5	90.5	66.5	57	64.5	91	64.5	36.5	60	61	77.5	61.5	69.5	88	87	41.5	63.5	59	58.5
AT1G04970	182	126	145	119.5	120.5	107	110	138	95	112	85	156	129.5	105	136	125	130.5	137	144	108	102	112	113.5	115.5	96	116.5	91	143.5
AT1G04980	65.5	44.5	99	73.5	89.5	67.5	88	63.5	79.5	40.5	98.5	47	88	80	81	80.5	105	91.5	82	72.5	65.5	90.5	62.5	45.5	51	69.5	97	67.5
AT1G04985	61	56	40.5	61.5	42	39.5	55	60	42.5	51	48.5	17.5	70.5	55	50.5	59.5	78	43.5	42	53	42.5	45.5	76	84.5	65.5	31	50.5	61
AT1G04990	107.5	91	115.5	174	137.5	139.5	122.5	134	129.5	83.5	88	150.5	115.5	119.5	124.5	114	87	104.5	114.5	146	116.5	110	88	147.5	51	95.5	85	70.5
AT1G05000	137.5	193.5	134	43.5	40.5	26.5	82.5	65.5	66.5	201.5	90.5	93	144	87.5	107.5	114.5	110	89	119.5	47.5	44.5	38.5	26	74	76	119.5	157	140.5
AT1G05010	84	98.5	72.5	102	111	95	125	104	67.5	151.5	85	123.5	127	97	100	96	76	59	67.5	102	84.5	122.5	76	129.5	46	111.5	59	94.5
AT1G05030	12.5	22	22.5	15.5	22.5	16	23.5	22.5	26.5	37	22.5	6	25.5	17	21	32.5	23.5	27.5	29	30	25	23.5	76	13.5	41.5	15	37	40.5
AT1G05055	10.5	56	32	38.5	36	32	49.5	42.5	29	51	20	34.5	41.5	33	42.5	42.5	35	35	41.5	29.5	23.5	39.5	14.5	27.5	27	35	39.5	14.5
AT1G05060	28.5	67.5	34	30	34	37	34	34.5	36.5	26	15	6	40.5	50	49.5	46	27	37.5	32	37	42.5	40.5	14.5	27.5	18	38	23.5	35
AT1G05065	2.5	0	8.5	1	5.5	2	3.5	7	3	0	0	9.5	2	6	5	2	1	5.5	1	1.5	2	3	0	4.5	13.5	2.5	0	2.5
AT1G05070	50.5	51.5	74.5	58	59.5	39.5	77	46.5	54	22.5	77	106	62.5	51.5	54	45	53.5	57.5	38.5	51.5	61.5	49.5	37.5	53	107	51.5	91	40.5
AT1G05087	8	13	17	10.5	9.5	8	12.5	2	1	0	7	13.5	0	13.5	8	4.5	6	4.5	2.5	4.5	9.5	7	0	6	13.5	6	5	9.5
AT1G05090	12.5	0	2.5	5	2.5	9.5	10	3.5	5.5	0	12.5	9.5	5	0	5.5	6	3	5	4	2	2.5	3	0	6	0	1	3	0
AT1G05100	9.5	15	10.5	23.5	36.5	33	19.5	36.5	10.5	7	3	9.5	11.5	16.5	13.5	5.5	6	7	6	11.5	10.5	18	37.5	11.5	9	8	3	9.5
AT1G05120	139.5	175	154	135	107.5	138	133.5	130	102	109	122.5	101.5	115	90	150.5	118.5	132.5	142.5	128.5	153	153	165	153	198	127.5	141.5	114	134
AT1G05140	33	40.5	24.5	39	20.5	30	19.5	22.5	16.5	16	54	0	30	29	22.5	25.5	20	20.5	22.5	34	33	26	37.5	43.5	13.5	12.5	48	14.5
AT1G05150	148.5	108	118.5	133.5	103.5	145	124	115.5	143.5	238	88	88	98.5	158.5	125	117.5	145	126	124	121.5	122.5	127	196	111.5	137.5	192	131.5	119.5
AT1G05160	34.5	15	27	40.5	36	39.5	49	36.5	36.5	30	31	75	29	31	32	27.5	50	32	36	40.5	30	33	14.5	57	80.5	29	21	32.5
AT1G05170	58	47	36.5	62	73	87	76	63.5	77	133.5	61.5	30	50.5	41.5	49	59.5	41.5	40.5	48.5	57	63.5	60	26	67.5	36.5	50	45.5	72.5
AT1G05180	120.5	116.5	92	161	163	114.5	141	119.5	132.5	72.5	135	150.5	122.5	126	125	113	145	121.5	131.5	147.5	161.5	136	113.5	152	96	139.5	123.5	164
AT1G05190	40.5	63	34	41.5	29.5	32	52	32	40.5	16	31	84	43.5	47.5	46.5	49.5	45	42.5	43.5	66	49	68.5	50	39	102	59	21	43
AT1G05200	19.5	35.5	22.5	15	30	17	10	31	30	40.5	17	13.5	21	17	15.5	20	27	23.5	27	19	13.5	15.5	76	17	36.5	20	34.5	22
AT1G05205	15	24.5	10.5	38	34	22.5	41.5	34.5	21.5	58	31	42.5	39.5	27	26.5	25.5	14	43.5	28	34	27	21.5	38	19.5	0	12.5	37	32.5
AT1G05210	30	19.5	24.5	21	27	21	27.5	21	25.5	0	33.5	0	24	19.5	21.5	21	30	38.5	22.5	20	28	20	0	41.5	22.5	13.5	15.5	7
AT1G05220	3.5	0	10.5	6	3.5	3.5	9	5	9	0	7	0	5	5.5	3.5	7	0	4.5	3.5	3.5	7	1	0	13.5	13.5	3.5	0	11.5
AT1G05260	794	971.5	745.5	663	719	692	631	645.5	636.5	730	936.5	706	691	630	649.5	805	714	689.5	739.5	579.5	559	566.5	475.5	701.5	696.5	671	710	660.5
AT1G05270	131.5	132.5	84.5	102.5	93	96.5	115	71.5	132.5	43.5	88	62	106.5	87.5	87	100.5	118	102	95	111	110.5	110	113.5	103	96	132.5	73.5	106
AT1G05280	13.5	2.5	8.5	28	12.5	18.5	14.5	10.5	16.5	7	17	6	7	19.5	18	12.5	15	10.5	11.5	19	19	20	14.5	4.5	32	26	21	30
AT1G05300	24.5	40.5	42.5	21	23.5	24.5	8	44.5	24	40.5	48.5	34.5	77	36.5	39	31	18.5	15	11.5	14.5	9	11.5	76	23.5	9	15	39.5	48.5
AT1G05310	9.5	15	6	12.5	20.5	3.5	8	16.5	29	0	17	0	14.5	11	9	10.5	6	4.5	2.5	15	17	13.5	0	21.5	36.5	13.5	18	4.5
AT1G05320	68.5	84	86.5	76	82.5	46	42.5	61.5	78	47	101.5	97	110	80	98	84.5	68.5	49.5	69.5	82	69.5	74.5	114	61	85.5	77.5	59	72.5
AT1G05340	46.5	40.5	42.5	45	62.5	35.5	46	42.5	40.5	22.5	77	42.5	67.5	43.5	56.5	54	55	34	30	54.5	42.5	61.5	14.5	55	27	32	26	22
AT1G05350	123.5	114.5	123.5	103.5	110	132.5	114	152	119	127	109	196	99	111.5	111	92.5	110	115.5	116	89	110.5	94	196	89	112.5	108	138	100
AT1G05360	105.5	103.5	92	79	100.5	53	61.5	58	82.5	109	59	66.5	78.5	58	66.5	88	112.5	110	86	82.5	89	79	38	101.5	65.5	101.5	114	94.5
AT1G05370	2.5	4.5	8.5	8	2.5	16	10.5	5	4.5	0	0	0	9.5	7	7	10.5	7	10	7	7	5.5	9	62.5	7.5	9	6	7.5	0
AT1G05380	130.5	114.5	86.5	142.5	133.5	119.5	166.5	104	141.5	130.5	90.5	58.5	69.5	121.5	135	91	110	109	111	141	158.5	156	141	182	164	132.5	120.5	151
AT1G05385	8	6	0	1	4.5	3.5	3.5	3.5	5.5	26	15	9.5	4.5	10	2	9	10.5	2.5	4.5	7	2	4.5	0	2.5	0	3.5	5	4.5
AT1G05397	2.5	2.5	0	5.5	2.5	0	0	2	0	10	0	0	7	2	3.5	0	6	0	1	0	0	1	0	0	0	1	0	2.5
AT1G05400	6.5	0	13.5	10	7	14.5	4.5	7	8	30	0	0	6	12.5	5.5	8.5	4.5	8.5	4	10	3.5	4.5	0	9.5	5.5	5	3	2.5
AT1G05410	27	22	32	48	41.5	38.5	67	38.5	49	51	35.5	62	44.5	51.5	53	35.5	53.5	49	50	45.5	49.5	65.5	26	37	70.5	43.5	50.5	40.5
AT1G05420	3.5	8.5	0	1	1	1	0	0	1	0	0	0	1.5	4.5	2	3.5	4.5	1	0	1	0	3.5	0	0	0	0	0	7
AT1G05430	56	98.5	59	52	61	79	66.5	52.5	53	87	64	88.5	63	52.5	72	83	65.5	63.5	57	69.5	62	58.5	88	31	51	55	94	53.5
AT1G05440	0	6	0	0.5	5	7	3.5	7	6.5	0	12.5	0	3.5	4.5	5.5	5	4.5	7	6	4.5	5.5	1	38	4.5	5.5	1	7.5	0
AT1G05450	8	15	6	18	7	14.5	3.5	14.5	1	22.5	15	6	18.5	6	7	4.5	1	3.5	5.5	7	7	6	0	9.5	0	5	0	7
AT1G05460	32	19.5	38.5	27	30	37	42.5	21	44.5	37	25.5	9.5	40.5	39.5	34	23.5	35	26	23.5	37	49.5	42.5	14.5	29	22.5	35	21	9.5
AT1G05470	53.5	67.5	74.5	34	37	53	62.5	21	51.5	122.5	74	50.5	53	52.5	58	62	87	51	89	65.5	69.5	66.5	88	47	56	67.5	68.5	43
AT1G05490	2.5	4.5	2.5	4.5	4.5	8	3.5	3.5	4.5	0	0	13.5	6	3.5	3	3.5	0	5	3.5	2	0.5	2	50	6	0	2.5	0	2.5
AT1G05500	218.5	185	159	176	198	185	187	158.5	163	151.5	189.5	207	197	207	184.5	227.5	188	185	194.5	202.5	184.5	192.5	324	194	198	192	150	181
AT1G05503	6.5	10.5	20	3.5	7	3.5	0	7	8	68.5	15	9.5	7	3	4	3.5	6	5	3.5	6	4.5	5.5	88	21.5	0	16.5	7.5	14.5
AT1G05520	215	157.5	216.5	232	226	259	189.5	216.5	251	250.5	206	229.5	160	225	226	210.5	206.5	214	209	213.5	240.5	184.5	127.5	203	212.5	213.5	229.5	228.5
AT1G05530	6.5	8.5	10.5	15	12.5	9.5	21	14.5	12.5	10	7	13.5	6	15	13.5	6	12.5	15	6.5	19	10	14	26	0	5.5	6	10	11.5
AT1G05570	346.5	279.5	259.5	203.5	231.5	163	186	205.5	206	163	251	294	141	220.5	246	184	199.5	165	221.5	231.5	175	238.5	309.5	221.5	137.5	258	293	318.5
AT1G05575	9.5	0	0	2	5.5	2	0	0	2	0	3	9.5	2.5	3	4.5	5	1	1	2.5	3.5	0	3	0	0	0	5	3	2.5
AT1G05577	0	0	4.5	0	0	2	0	9	1	0	7	0	1.5	3	2.5	0	4.5	2.5	0	1.5	0	1	0	6	0	1	0	4.5
AT1G05590	21	26.5	42.5	26.5	20.5	21	27.5	26.5	38	16	45.5	6	26	36	23.5	34	22	33	24.5	21.5	22.5	27.5	14.5	49	5.5	33.5	50.5	38
AT1G05600	9.5	6	4.5	5	8	8	3.5	9	12.5	19.5	5	0	7	8.5	6	10.5	14	8.5	7.5	7	7	9.5	14.5	6	9	13.5	0	4.5
AT1G05610	5	6	6	2.5	2	2	1.5	2	3	0	0	0	2.5	2	3.5	3.5	3	4.5	2.5	1	0	2	0	11.5	0	2.5	7.5	0
AT1G05620	123.5	51.5	106.5	136	140.5	152	129.5	138	114	98.5	71.5	190.5	144	132.5	153	163	101.5	145	147.5	131.5	152.5	119	240	114	153.5	168.5	111	151
AT1G05630	40.5	29	29	39	39.5	33	53	46.5	46	61.5	40.5	34.5	21.5	51	43	42.5	50	40.5	36.5	45.5	47.5	38	14.5	39	13.5	56	45.5	43
AT1G05640	15	4.5	24.5	9	6	9.5	18.5	5	11.5	0	3	17.5	4.5	9.5	11.5	4.5	6	13.5	7	8	13.5	11.5	26	2.5	0	8	10	7
AT1G05650	10.5	24.5	8.5	16	16	2	4.5	5	4.5	10	9.5	17.5	7.5	3.5	4.5	3.5	1	3.5	5	29	13.5	16	0	9.5	0	3.5	0	2.5
AT1G05660	53.5	22	27	30	34.5	18.5	37.5	69.5	42.5	40.5	38	38.5	28.5	37	41.5	24.5	27	30	37.5	56	70	35	88	35	18	62	34.5	58.5
AT1G05670	24.5	38	17	21.5	22.5	14.5	23.5	9	19	54	12.5	34.5	12.5	11	21	12.5	22	22	23.5	18	16.5	21	0	11.5	18	33.5	12.5	27
AT1G05680	96	77	134	498.5	416.5	293.5	209.5	158.5	194	170.5	135	133	262	275.5	322.5	165.5	180.5	147	154	244.5	258	205.5	88	144.5	183.5	142.5	163	94.5
AT1G05690	13.5	6	8.5	14	27	14.5	8	2	19	30	5	0	12.5	9.5	10.5	9	6	8	9	10	2.5	14	26	7.5	9	10.5	7.5	7
AT1G05700	24.5	29	17	2.5	2.5	6	4.5	7	1	0	3	0	4.5	4.5	9.5	20	10.5	8	17.5	3.5	7	7	0	17	18	16.5	42.5	32.5
AT1G05710	65.5	130.5	74.5	95	108	129.5	82.5	81.5	70.5	54	96	106	102	68.5	66.5	84	91	95	72	76	98.5	88	88	103	41.5	84	73.5	58.5
AT1G05720	16.5	24.5	27	25.5	23.5	29	21	21	32	12.5	43.5	25.5	18.5	24.5	21	21	27	29	34	20.5	20.5	19.5	127.5	9.5	18	32	23.5	16.5
AT1G05730	1	2.5	2.5	4.5	6	2	14	0	4.5	0	7	9.5	4.5	6	3.5	2	1	6	6	3.5	1	3	26	4.5	5.5	2.5	7.5	14.5
AT1G05750	13.5	4.5	10.5	11.5	8	16	7	10.5	6.5	34	0	6	3.5	10	8	9.5	3	6	14.5	9	9.5	9.5	38	4.5	13.5	9	7.5	9.5
AT1G05770	2.5	2.5	0	10	3.5	6	10.5	0	11.5	7	9.5	0	8	3.5	8	7	4.5	10.5	5.5	9	13.5	2	0	11.5	0	5	0	9.5
AT1G05780	10.5	4.5	24.5	19.5	12.5	17	14	21	8	0	0	34.5	19.5	14	13.5	14	15	14.5	14.5	14.5	12.5	11.5	0	23.5	13.5	21.5	15.5	24.5
AT1G05785	37.5	19.5	17	37	26	32	13	48.5	28	54	20	38.5	31	22.5	28	30	39.5	36	33	27.5	35	25.5	14.5	33.5	18	36.5	50.5	24.5
AT1G05790	71.5	49.5	68	55	68.5	57	49.5	76	57.5	61.5	77	42.5	58.5	60.5	74	78	36.5	53	69.5	71	79	71.5	76	63	96	55	71	56
AT1G05805	56	63	65.5	51.5	42.5	32	50.5	48.5	60	61.5	64	42.5	67.5	76	63.5	83.5	52	70.5	72	58	52.5	46.5	38	57	91	76	91	78
AT1G05810	25.5	51.5	34	17.5	12	7	14.5	31	29	19.5	40.5	34.5	28.5	22.5	26.5	35	30	34	40.5	20	18.5	22.5	14.5	21.5	32	21.5	23.5	9.5
AT1G05820	6.5	0	2.5	3.5	6	9.5	7	16.5	6.5	10	7	21.5	6	7	5.5	7	0	15.5	5.5	5.5	3.5	9.5	14.5	0	5.5	6	0	9.5
AT1G05830	153	137	152	149.5	144	180	148.5	158.5	138	211.5	117.5	80	94	129.5	136	120.5	145	175	182.5	126	133.5	138	225	165.5	107	168.5	194.5	181
AT1G05840	62.5	110.5	131.5	94	93	87.5	78	67.5	92.5	98.5	59	58.5	74	72	69.5	101.5	74	96	89.5	84	81	64	0	124.5	70.5	98.5	94	78
AT1G05850	1491	1349	1491	1053	1015	1030	1214	1613	1314.5	1507	1355.5	1738	1401.5	1322.5	1281.5	1554	1349	1349	1511.5	1287.5	1301.5	1181.5	1078	1226.5	1297.5	1366.5	1469.5	1525
AT1G05860	40.5	44.5	42.5	27	28	32	22	22.5	44.5	7	17	30	31	28	26	25.5	29	27	37.5	34.5	30	38.5	62.5	27.5	36.5	26	56	22
AT1G05870	183.5	207	170	147.5	168.5	177	180	160.5	158.5	186	192.5	165	183.5	131.5	145	185.5	175	214.5	185	146	133	172	196	135	219.5	141.5	245	172.5
AT1G05880	3.5	4.5	17	4.5	1	0	1.5	2	5.5	0	9.5	9.5	0	0	0	0	1	2.5	1	3.5	2	6	50	0	5.5	8	0	4.5
AT1G05890	302	243	253	260.5	222.5	308.5	277	259	278	330.5	279.5	220.5	213.5	269.5	211.5	250.5	253	292.5	255.5	278	266.5	265.5	410.5	309.5	296	255	264.5	235
AT1G05894	2.5	2.5	0	1	1	4.5	1.5	0	0	0	5	0	0	0	1	1	0	1	2	1.5	0.5	0	0	2.5	0	1	3	2.5
AT1G05900	54	26.5	65.5	36	52	36	35	34.5	24	30	48.5	101.5	49.5	41.5	35	40	22	45	48.5	47.5	66.5	38	0	27.5	36.5	61	34.5	14.5
AT1G05910	122	89	109	116.5	138.5	156	137	100	117.5	127	122.5	101.5	72.5	126	140	77	94	112.5	130.5	128.5	131	107	196	111.5	127.5	119.5	79	88
AT1G05940	116.5	128.5	77	94	98.5	102	88	90	97	43.5	117.5	88.5	81	113	113	122.5	94	115.5	118.5	97.5	108.5	94	114	84.5	56	134	94	75
AT1G05950	10.5	22	22.5	11.5	18	22.5	10	10.5	11.5	16	7	34.5	15	7.5	19.5	11.5	18.5	20.5	23.5	12.5	16	15	15	13.5	18	21.5	32	30
AT1G05960	284.5	265.5	227.5	289.5	279.5	332.5	248	259.5	281	255.5	298	203.5	205	248.5	259	212.5	259	253	277	286	310	284	182	322.5	330.5	260	306.5	296.5
AT1G05970	22.5	13	0	18	12	8	10.5	18.5	9	0	25.5	0	19.5	16	6	20.5	7	14.5	17	9.5	13.5	12.5	0	7.5	18	8	7.5	19.5
AT1G06010	16.5	44.5	22.5	18	25.5	21.5	26.5	31	24	37	20	34.5	36	21	25.5	20	25.5	30	31	27.5	19	27.5	15	23.5	13.5	36.5	21	48.5
AT1G06040	574.5	696.5	672.5	436	463	480.5	547.5	490.5	503.5	448	631	539	652.5	520.5	524.5	668.5	701	640	655.5	538.5	475.5	525.5	427.5	490	522.5	613	482.5	607.5
AT1G06050	16.5	6	34	11.5	15	7	29	5	8	12.5	3	9.5	14.5	9.5	18	17	15	15	14	10.5	15	10.5	0	11.5	9	21.5	29	4.5
AT1G06060	54	94	54	51	42.5	39.5	67.5	54	49	61.5	59	38.5	54	59.5	45	56	48.5	53.5	56	79	62	54.5	15	43.5	46	56	62.5	64
AT1G06070	68.5	54	72.5	73.5	86.5	57	87.5	95.5	66.5	51	71.5	25.5	65.5	55	71.5	79	48.5	74	74.5	58	52	59.5	50	76	37	55	34.5	75
AT1G06080	15	8.5	6	25.5	21.5	22.5	38.5	36.5	15	16	25.5	0	14	14	15.5	14	14	14	13.5	16.5	18	12.5	0	17	13.5	10.5	3	2.5
AT1G06090	94	134.5	79.5	85.5	91.5	86	117.5	97.5	110	76	90.5	101.5	78.5	82.5	55	28	43	29	19	79	103.5	89.5	153	129.5	32	97	79	97
AT1G06110	133.5	94	159	146	152	122.5	169.5	167	175.5	133.5	146	97.5	203	142.5	153	184	170.5	155.5	149	175	175	158	114	173	85.5	111.5	138	80
AT1G06120	13.5	40.5	13.5	0.5	5	0	1.5	5	8	16	3	9.5	16	10	16	13.5	0	11.5	7	14	2	4.5	0	2.5	0	22.5	3	9.5
AT1G06130	49	26.5	65.5	46.5	43.5	52	48	58	47.5	76	54	34.5	58.5	63.5	72	68.5	67.5	56	48	61.5	49.5	63.5	50	41.5	37	51.5	48	43
AT1G06140	2.5	0	0	1	4.5	3.5	0	2	3	12.5	3	9.5	0	2	0	0	3	1	2	1	1	4.5	0	4.5	0	1	0	9.5
AT1G06143	3.5	0	0	1	5	8	4.5	7	2	0	5	0	7	6	6	5.5	3	7	5.5	5	6	3	0	0	13.5	0	0	0
AT1G06150	151.5	114.5	212	125	124.5	132.5	109	126	141.5	130.5	109	138	122.5	121.5	149.5	145	148.5	134	170.5	153	175	168.5	127.5	239	189	172.5	168.5	108
AT1G06160	12.5	2.5	4.5	1	5.5	0	0	7	0	0	5	0	0	0	0	3.5	3	2	2	3.5	1	5.5	26	4.5	0	1	0	0
AT1G06170	0	2.5	0	6	5	8	0	5	5.5	10	7	0	4.5	4.5	3	7	1	2	3.5	1.5	2.5	2	26	7.5	0	2.5	3	0
AT1G06180	27	22	42.5	29	44	29	51.5	18.5	44.5	19.5	64	30	41.5	53	44.5	26.5	30	49	36	44.5	48.5	32	100.5	41.5	27	33.5	18	22
AT1G06190	50.5	47	20	46.5	59.5	49	55	31	35	47	48.5	21.5	42	54	48.5	37	50	60.5	44.5	44.5	38.5	56	0	55	46	24.5	56	32.5
AT1G06200	76.5	101	111	112	119	134	115	81.5	127.5	98.5	88	138	141.5	93	106.5	137.5	166.5	128.5	119.5	101	90	134.5	26	95	102	119.5	94	91
AT1G06210	133.5	86.5	79.5	126	159	119.5	151	119.5	152.5	90	158.5	123.5	128.5	119.5	137	133.5	188	106.5	115.5	147.5	144.5	159.5	88	105	122.5	108	153	119.5
AT1G06220	242.5	261	292	258	261.5	262.5	290.5	246	263	170.5	269.5	229.5	176	258.5	249.5	217	249	224	261	265.5	283	233.5	209	194.5	183.5	239.5	261.5	231
AT1G06230	180	169.5	199.5	196	212.5	227	183.5	214.5	192.5	256	209.5	207.5	146	180.5	194.5	163	145	175	201.5	215	207.5	198	167.5	253	219.5	182	175	194.5
AT1G06240	27	17	6	25	25.5	28	16	36.5	15	22.5	12.5	9.5	22.5	27	18	17	7	32	20.5	21.5	31	15.5	0	15	32	21.5	7.5	7
AT1G06250	6.5	6	4.5	2.5	5.5	2	5.5	0	2	10	5	6	4.5	3	6	2.5	3	6	8	3.5	6	4.5	0	13.5	9	5	0	4.5
AT1G06265	2.5	2.5	6	2.5	8.5	3.5	9	3.5	8	0	7	9.5	10.5	4.5	4.5	4.5	7	11.5	6.5	10.5	5.5	4.5	15	9.5	9	9	5	2.5
AT1G06270	13.5	26.5	10.5	17.5	24.5	16	16	18.5	19	34	0	13.5	13.5	11.5	12.5	12.5	14	15.5	10	19	24.5	7	15	6	18	16.5	7.5	9.5
AT1G06290	266.5	290.5	199.5	261	243	168.5	304	351.5	288.5	256	288	267	208.5	256	279.5	214.5	209	224	209.5	296	256	228	167.5	227.5	373	236.5	340.5	205.5
AT1G06310	21	22	2.5	14	13.5	12	12.5	22.5	15	34	9.5	0	9.5	9.5	10.5	8.5	4.5	14	14	11.5	6	10.5	0	17	32	15	3	11.5
AT1G06350	8	4.5	4.5	4.5	2	2	14	5	6.5	10	3	0	1.5	3.5	7	4.5	4.5	3.5	2.5	7	3.5	2	15	0	0	8	15.5	0
AT1G06380	16.5	22	17	20.5	18	17	23.5	34.5	19	47	40.5	0	20	35	23.5	21.5	27	27.5	24.5	12.5	20	18.5	0	11.5	0	38	18	9.5
AT1G06390	136	169.5	129.5	211.5	185.5	194.5	192.5	176	203	273	153	119	169.5	175	190	169.5	150	189	167	190.5	187	177	225	150	112.5	177	165.5	151
AT1G06400	195.5	172	157	199	202.5	193.5	239.5	212.5	224	206	206	272.5	291.5	279.5	277	281	288.5	244.5	228.5	225	204	209	127.5	182	260.5	231	325.5	290.5
AT1G06410	344	294	334	307.5	341	302.5	303	311.5	278	206	373	229.5	211	360.5	364.5	246	287	292.5	333	310.5	292	343.5	324	376	313	349.5	306.5	326
AT1G06420	3.5	22	2.5	7	7	2	1.5	9	8	0	3	9.5	7	6	6	5.5	4.5	2.5	3.5	3.5	3.5	7	15	6	13.5	3.5	5	4.5
AT1G06430	111	149.5	86.5	125	177	169.5	147.5	131.5	117.5	109	146	234	136	169.5	146.5	115	79.5	78.5	70.5	140	110.5	138	182	78.5	102	100	85	72.5
AT1G06440	2.5	8.5	0	7.5	4.5	4.5	6	7	8	0	0	6	6	10.5	6	6	3	1	5	3.5	2	6	0	4.5	0	0	0	4.5
AT1G06460	2.5	2.5	8.5	2	7	4.5	6	2	2	0	15	6	7	8.5	8	12.5	10.5	5	5.5	3.5	7	7	26	9.5	0	1	5	9.5
AT1G06470	72.5	60.5	106.5	65.5	67.5	57	48	52.5	61.5	51	64	34.5	61	72	67.5	62	76	68.5	87	92	59.5	83	62.5	43.5	85.5	85.5	85	88
AT1G06473	22.5	4.5	22.5	18	18	22.5	27.5	24.5	21.5	10	22.5	47	11.5	9.5	13.5	19	10.5	10.5	18.5	28.5	30	41.5	88	6	27	31	12.5	9.5
AT1G06490	65.5	58.5	52	60.5	51.5	65.5	76.5	63.5	72.5	61.5	61.5	13.5	34	55.5	51	42.5	67.5	61.5	73	60	64.5	81.5	100.5	93.5	46	55	68.5	53.5
AT1G06500	5	8.5	6	10	14	14.5	15	12.5	3	0	5	0	22.5	11.5	11.5	14.5	9	14	13.5	11.5	13.5	12	15	17	18	5	21	35
AT1G06510	12.5	35.5	29	12.5	8.5	17	22.5	12.5	5.5	37	7	6	16	17	14.5	11.5	10.5	10.5	10	17.5	20.5	21.5	0	41.5	22.5	9	12.5	9.5
AT1G06515	9.5	6	22.5	25	15	23.5	25	34.5	11.5	10	9.5	34.5	29.5	18	25	31	17	29	21	25.5	21.5	29	38	31	22.5	12.5	23.5	16.5
AT1G06520	15	10.5	13.5	12.5	17	33	11.5	9	14	22.5	3	0	10.5	7.5	11.5	9.5	15	8	9	28.5	23.5	23.5	62.5	27.5	41.5	8	3	17
AT1G06540	21	10.5	10.5	10	10.5	21.5	13	2	10.5	16	15	6	12.5	7.5	6	7	7	11.5	7	8	7	7	0	6	5.5	8	7.5	7
AT1G06550	701	636.5	501.5	470.5	492	480	487	415.5	500.5	467	468.5	620	511.5	540.5	533.5	585	577.5	628	656.5	544	614.5	535.5	712.5	464.5	624.5	586.5	611.5	569
AT1G06553	3.5	4.5	0	1	1	4.5	0	2	2	7	3	0	0	1	1	1	1	5	1	0	1	0	0	7.5	0	3.5	5	4.5
AT1G06560	19.5	29	42.5	37	32	43.5	45.5	32	44.5	76	20	38.5	32	40.5	28	27.5	32	33.5	37	28.5	45.5	23.5	0	35	27	29	37	38
AT1G06570	123.5	94	134	183.5	162.5	156	145	196.5	142.5	122.5	129.5	128.5	119.5	122.5	116.5	103.5	94	86.5	82	128.5	123.5	136	62.5	89	51	89	111	108
AT1G06580	15	4.5	4.5	8	8	10.5	3.5	14.5	5.5	0	17	0	7	11	7	9.5	7	5.5	8.5	5	11.5	6	26	23.5	22.5	6	10	7
AT1G06590	64	33.5	74.5	64	65.5	70.5	72.5	98	50	65	64	50.5	56	59.5	58	46.5	50	63.5	66.5	63.5	73.5	66.5	114	87	56	66.5	79	61
AT1G06620	104.5	91	68	144	132	108	82.5	154	98.5	127	96	38.5	138.5	102	139.5	126	91	101.5	99.5	128.5	116.5	136.5	88	47	76	76	79	100
AT1G06630	67.5	49.5	89.5	77	89.5	84.5	52	58	55	65	33.5	58.5	59	59	63.5	54	106.5	84	76.5	55	79	73	76	109	65.5	58	102.5	100.5
AT1G06640	897	997	1082.5	961	1002.5	1140	1081.5	1014	1016	1054	947.5	1086	1312	1347	1177.5	1393.5	1378.5	1114.5	1244	1050.5	1071.5	1116.5	953.5	954.5	814.5	947	964.5	870
AT1G06645	2.5	2.5	0	0	2.5	1	5.5	3.5	0	0	0	0	0	0	0	1	0	0	1	1	2	1	0	6	0	3.5	0	0
AT1G06650	52	58.5	27	31	24.5	33	28	34.5	36.5	54	33.5	38.5	50.5	43.5	37	47	50	37.5	35	54	38.5	38.5	62.5	35	22.5	40.5	32	24.5
AT1G06660	15	17	6	22.5	12	21.5	14	22.5	12.5	26	12.5	30	9.5	18	8	9	17	19.5	12.5	17.5	9	18.5	0	13.5	0	15	21	11.5
AT1G06670	242.5	220.5	231	216.5	219.5	231	212.5	223	225	226	217	110.5	176	242.5	246	190	219.5	275	245.5	205	240.5	211.5	411	263.5	231	235	223.5	228.5
AT1G06680	137.5	161.5	145	127.5	145	144	214.5	182.5	198	263.5	184.5	106	200.5	134	136	184	157	146	84.5	214.5	193.5	240	182	243	122.5	174	116.5	136.5
AT1G06690	56.5	63	63.5	52	57	49	54	44.5	55	16	38	30	73	62	48.5	54	53.5	36.5	49	47	51	64	15	25.5	70.5	29	50.5	38
AT1G06700	275.5	310	301	320	309.5	293.5	294	269.5	322.5	303	285.5	324.5	294	275	309.5	323.5	331	318.5	338.5	348.5	329	317	392	273.5	426.5	317	362	335
AT1G06710	16.5	17	8.5	18	19	29	6	21	19	12.5	20	6	5	16	19.5	9.5	15	18	17	16.5	12.5	15	26	9.5	5.5	20	18	17
AT1G06720	142.5	112.5	149.5	137.5	175	184	189.5	138	169.5	127	120.5	156	154	179	160	114.5	160	184.5	173	152	172	146.5	88	135	244	159	123.5	116.5
AT1G06730	33	49.5	68	25.5	36.5	33	32	31	35	22.5	51	47	27.5	44.5	34	25.5	23.5	34.5	35.5	36.5	25.5	33	62.5	29	61	36.5	42.5	38
AT1G06740	16.5	10.5	13.5	7	12.5	14.5	9	10.5	11.5	19.5	5	13.5	5	11	10.5	11.5	4.5	9.5	11.5	16	15	11.5	0	11.5	18	16.5	15.5	30
AT1G06760	407.5	420.5	453.5	290	272.5	241.5	460.5	338.5	411.5	250.5	329	386	408	448	383	362.5	388.5	345	305.5	348.5	382	308	602.5	438	427.5	459.5	362.5	411
AT1G06770	30	8.5	13.5	29	17.5	21.5	27.5	28.5	21.5	19.5	28	17.5	20	16.5	22.5	18	27	19.5	22.5	17.5	19	27.5	0	21.5	13.5	26	37	24.5
AT1G06780	156	155	129.5	166.5	155	188	133.5	130	161.5	179	172	101.5	117.5	126	131.5	110	170.5	124	137.5	151	157	189	209	122.5	174	134	141.5	183.5
AT1G06790	28.5	13	29	21.5	14	21.5	21	9	32	7	28	6	15	28	14	27.5	25.5	26	26.5	19	16.5	16	15	17	9	18	10	32.5
AT1G06800	19.5	13	20	17.5	18	4.5	20	12.5	18	19.5	3	17.5	5	14	15.5	9.5	14	6	9	6	7	10.5	50	7.5	9	5	7.5	0
AT1G06820	71.5	40.5	77	80	52	67.5	56	61.5	63.5	40.5	20	34.5	58	75	59	59	72.5	69.5	65.5	74	74.5	66.5	88	65	51	63.5	68.5	56
AT1G06840	231.5	265.5	275.5	209.5	193.5	207.5	185.5	239.5	242	170.5	265.5	207.5	153.5	182	183.5	189	209	196	224	186	214.5	200.5	100.5	212.5	179	220.5	163	253
AT1G06850	55	56	54	42.5	45.5	49	53	42.5	40.5	22.5	66.5	62	62	57	61	61.5	53.5	73.5	42.5	48.5	46	50.5	26	29	37	35	37	38
AT1G06870	127	140	152	133.5	163.5	154	138.5	114	133	116	77	138	174	189	167.5	154	110	162	147	129.5	133.5	137	76	140	122.5	137.5	141.5	159
AT1G06890	199	153	304	208	243	210.5	158.5	176	196.5	141.5	129.5	229.5	173	184.5	201.5	205	182.5	219.5	218	226	203	185.5	182	265.5	183.5	211.5	200.5	202.5
AT1G06900	193	175.5	179.5	225	225	231	163.5	182.5	224	208.5	164	168.5	115	187	184.5	144	179	179	188	243	225	226	196	282	330.5	239.5	183.5	214.5
AT1G06910	15	17	10.5	17	19.5	19.5	19.5	21	19	0	12.5	30	21.5	14	23.5	22.5	12.5	19	9.5	11.5	21.5	18	15	4.5	18	21.5	21	19.5
AT1G06930	3.5	10.5	10.5	7	0	10.5	9	2	4.5	0	17	26	6	5.5	4.5	8	10.5	9.5	3.5	5	5.5	5.5	0	19.5	9	1	0	2.5
AT1G06950	197	217.5	173	214	194.5	203.5	230.5	228.5	217	141.5	189.5	215.5	189.5	225	241.5	179.5	179	207	216.5	220.5	235.5	219.5	309.5	207	266.5	205	197	235
AT1G06960	30	40.5	22.5	35	37	37	35	24.5	34	61.5	28	17.5	44.5	42.5	32	43.5	45	60	47	44.5	55.5	38.5	15	59	46	26	34.5	72.5
AT1G06980	0	2.5	4.5	2.5	2.5	1	2.5	18.5	1	0	3	0	3.5	1	4	2	3	0	0	3.5	2.5	1	0	0	5.5	1	0	0
AT1G06983	3.5	6	6	1	1	1	1.5	7	2	0	7	0	1	0	0	1.5	3	3.5	1	1	1	1	0	2.5	0	5	0	0
AT1G07000	61	58.5	49.5	32	25.5	20	43.5	16.5	26.5	37	45.5	34.5	32	47.5	41.5	33	22	23.5	34	38.5	25	37	100.5	25.5	51	59	10	19.5
AT1G07010	16.5	10.5	29	14	15.5	14.5	9	7	8	37	5	13.5	10.5	15	18	11.5	20	15	16	20.5	25.5	22.5	0	9.5	9	12.5	10.5	19.5
AT1G07020	12.5	8.5	15	5.5	8	7	18.5	16.5	10.5	10	17	0	13.5	15	11.5	7	12.5	11.5	8.5	8	16	5.5	0	6	5.5	15	15.5	4.5
AT1G07030	106	86.5	86.5	117.5	106.5	122.5	126	104	131.5	127	90.5	119	91	119.5	129.5	105.5	121.5	109	120.5	97	104	92	100.5	87	96.5	92	97	70.5
AT1G07040	56.5	72	113	125	116.5	107	80	77	104.5	47	109	30	112.5	111.5	102	92.5	87	60.5	77.5	117.5	112	98.5	76	55	76	71.5	68.5	43
AT1G07070	50.5	24.5	61.5	65.5	56	76	108	67.5	72.5	61.5	88	75.5	100.5	86	71.5	62.5	92.5	110	67.5	64.5	70	53	76	59	61	66.5	102.5	64
AT1G07080	199	234.5	182	192.5	193.5	210.5	203.5	217	207	310.5	200	175	233	208	210.5	233.5	190.5	193.5	222	215.5	212	220.5	76	192.5	127.5	179	214	136.5
AT1G07090	46.5	63	54	51	49.5	43.5	55	63.5	57.5	47	28	17.5	98.5	66.5	73.5	101.5	52	48.5	57	48.5	50.5	68.5	50.5	69.5	18	45.5	29	35
AT1G07110	146	113	149.5	123.5	124.5	145	123.5	158.5	119	179	117.5	101.5	115.5	123.5	130.5	109.5	108.5	116.5	126	154	161.5	144	62.5	129.5	164	173	138	168.5
AT1G07140	313.5	294	389	404.5	401	389	403	354	348.5	256	256	414	448.5	456	400.5	368	426	385	411.5	374	349.5	442.5	587	348.5	400	415	538	399.5
AT1G07150	58	26.5	34	25.5	29	29	70.5	46.5	42.5	68.5	45.5	26	30	28	29	36	27	30	22.5	16.5	22.5	24.5	26	21.5	37	39.5	18	43
AT1G07170	42.5	60.5	29	31	34.5	33	46	21	36.5	37	25.5	9.5	49	39.5	31.5	34	20	31	36.5	38.5	46	38.5	26	39	61	43.5	29	38
AT1G07175	2.5	4.5	0	2.5	1	1	3.5	0	0	10	0	6	0	0	0	2.5	1	0	1	5	7	6	0	2.5	0	2.5	7.5	4.5
AT1G07180	2.5	0	4.5	1	0	3.5	9	2	2	0	3	9.5	0	2	0	0	6	0	0	0	2	6	0	0	0	1	7.5	0
AT1G07200	163.5	153	164.5	133.5	130.5	144	159.5	148.5	157.5	186	168.5	160	76	115	145	129.5	96	114.5	97.5	119.5	144.5	168.5	100.5	111.5	96.5	118	99.5	136.5
AT1G07203	13.5	17	2.5	13.5	10	26.5	10	9	14	37	9.5	9.5	15	10.5	11.5	13.5	7	20	14.5	8	21.5	16	38	21.5	13.5	12.5	18	27
AT1G07210	79.5	65	136.5	115.5	116.5	135	113	79.5	116	58	90.5	142.5	107.5	116.5	112.5	105	134.5	115	109.5	109	124.5	116	62.5	105	70.5	84	85	80
AT1G07220	36	24.5	36.5	45	53	57	54	40.5	38	58	45.5	21.5	39	50	48.5	54	63.5	49.5	47.5	60	55.5	38.5	15	53	51	55	32	27
AT1G07230	84	84	68	78	76	90	100	79.5	83.5	119.5	71.5	97.5	108	87.5	84.5	108	103.5	78.5	79.5	78	101	83	62.5	126.5	65.5	81	42.5	88
AT1G07240	115.5	98.5	79.5	77	101.5	99.5	105	63.5	85.5	127	79.5	119.5	92.5	94	110	92.5	91	68.5	70.5	80.5	83.5	76	182	93.5	27	74.5	62.5	97
AT1G07250	163.5	96	147.5	116.5	100	90	155.5	146.5	110	101.5	101.5	88.5	129.5	128.5	129.5	116.5	92.5	87	123.5	114	116.5	119.5	62.5	142.5	112.5	103.5	85	106
AT1G07260	43.5	65	56	62	61.5	59	90	71.5	42.5	34	51	30	59	71.5	54	84.5	58.5	57	64.5	81.5	114	67.5	38	55	85.5	35	59.5	58.5
AT1G07270	1	2.5	0	2.5	2.5	2	2.5	0	0	0	9.5	13.5	2	7	2.5	2	4.5	7	2.5	2.5	4.5	2	15	4.5	0	6	3	9.5
AT1G07280	2.5	4.5	8.5	5	2.5	9.5	8	0	2	0	3	0	2.5	8	5.5	0	12.5	3.5	4.5	12.5	7	9	0	2.5	9	9	23.5	4.5
AT1G07290	37.5	15	6	21.5	20.5	17	23.5	10.5	10.5	34	12.5	30	13.5	15	17	14.5	25.5	19	26.5	18	16	17	15	11.5	9	12.5	29	17
AT1G07300	3.5	6	6	10	9.5	10.5	9	2	9	0	25.5	13.5	8	22.5	12.5	18	12.5	10.5	7.5	11.5	10	7	26	4.5	0	5	7.5	2.5
AT1G07310	100	101	65.5	68.5	78	61.5	83	117.5	97	116	90.5	58.5	92.5	103.5	117.5	116.5	89	84	99	93	91	69.5	101	47	70.5	77.5	102.5	64
AT1G07320	64	33.5	52	56	46.5	41.5	61.5	79.5	42.5	80	64	34.5	72	40.5	53	69.5	67.5	43.5	49	59.5	56	59.5	62.5	87	22.5	45.5	37	48.5
AT1G07323	16.5	15	17	9	12	20	17	14.5	16.5	12.5	17	6	13.5	12.5	16	12.5	20.5	22.5	15	16	16.5	18	15	33.5	18	27.5	10.5	14.5
AT1G07350	166.5	243	159.5	194.5	207	269.5	226	193	195.5	130.5	158.5	263	246	209.5	227.5	229.5	202.5	221.5	189	183.5	265.5	175	62.5	182	133	177	178	125.5
AT1G07360	144	116.5	152	116.5	115.5	116.5	144	117.5	114	51	122.5	101.5	175	145	168.5	157	101.5	141	140	128.5	120.5	93	182	82.5	122.5	125	97	146
AT1G07370	40.5	33.5	70.5	48	50.5	39.5	72.5	54	63.5	30	61.5	80	69.5	68	60	54	63.5	84	75	38.5	65.5	44.5	50.5	71.5	46	51.5	53.5	78
AT1G07380	72.5	137	52	88	90	105.5	93	106	99.5	87	93	101.5	76	106.5	90	92	92.5	71.5	93	85	90	113	88	71.5	65.5	81	99.5	75
AT1G07390	2.5	0	0	5	1	4.5	2.5	2	2	0	0	6	0	5.5	2.5	3.5	0	2.5	2	1.5	4.5	6	15	4.5	5.5	2.5	0	2.5
AT1G07400	6.5	8.5	2.5	6	10	9.5	2.5	3.5	4.5	0	0	0	13.5	6	3	0	4.5	2	0	1.5	14.5	2	0	0	5.5	0	0	0
AT1G07410	25.5	31	17	18	23.5	16	20	12.5	22.5	34	35.5	42.5	15.5	25.5	25	21	17	22.5	18.5	19	23.5	17	15	41.5	18	38	34.5	30
AT1G07420	111	113	147.5	101.5	109	134	99	100	125	155	112	142.5	112	129.5	126.5	151	130.5	128.5	135	138.5	127.5	101.5	50.5	165.5	112.5	123.5	126	100.5
AT1G07430	1	0	2.5	28.5	41.5	68.5	14	24.5	32	0	0	0	1	0	3.5	0	4.5	2.5	2.5	17	21.5	30	0	2.5	13.5	1	5	7
AT1G07470	58	67.5	61.5	79	74	86	105.5	117.5	85.5	54	66.5	80	98.5	65.5	90	84	97.5	104	115.5	95	107	80	167.5	126.5	27	55	45.5	94.5
AT1G07480	28.5	65	49.5	37	52	43.5	52	44.5	56	72.5	22.5	50.5	58	55.5	36.5	64	55	46	59.5	81	51	45.5	50.5	33.5	56	46.5	42.5	43
AT1G07510	163.5	196	131.5	142.5	132	157.5	139.5	146.5	116	242.5	181.5	179	175	157	152	156	168.5	142.5	134	135	145	122.5	225	103	164	142.5	141.5	122
AT1G07530	98.5	123.5	99	106.5	100.5	127	129.5	134	104.5	90	74	138	110	104.5	95	102.5	115	104.5	122	114	96	127.5	76	142.5	112.5	101.5	108	111
AT1G07550	21	24.5	8.5	5.5	6	4.5	0	14.5	2	10	17	9.5	12.5	13.5	17	18	20.5	13.5	8.5	7	7	6	15	9.5	9	9	10.5	2.5
AT1G07560	70.5	84	36.5	34	19.5	17	19.5	54	25.5	40.5	15	58.5	26	34	44	34	17	38	33	27.5	16.5	21	26	21.5	27	33.5	39.5	48.5
AT1G07570	27	49.5	34	31	32	36	43.5	21	40.5	34	38	0	28.5	37	38	31	17	30	20	31	23.5	27	0	41.5	22.5	22.5	50.5	43
AT1G07590	1767	2071	1743.5	1871	1880.5	1767	517	1738	1322.5	2390.5	1666.5	2197.5	1233.5	818	957.5	1116.5	1061	1588	1401.5	754.5	829	1312	2267.5	2227	2197.5	1496.5	2267.5	2078
AT1G07610	952	1007	613	1304.5	1369	947	947.5	1009.5	842	952	1010.5	1115	2267.5	1405.5	1627	1360	1345.5	1082.5	1177.5	1202	999.5	1119	1411.5	1040	897	788	835	818
AT1G07615	30	6	34	29	24.5	20	28	28.5	28	10	33.5	30	29.5	22.5	26.5	35	30	33	35	29.5	40.5	23.5	26	47	46	21.5	21	35
AT1G07620	13.5	10.5	20	2	9.5	6	4	7	6.5	0	7	6	5	8	12.5	13.5	18.5	6.5	10	10.5	3.5	6	0	4.5	13.5	15	10.5	27
AT1G07630	109	108	99	99	96.5	118.5	97.5	104	82.5	198	96	102	89	98.5	102.5	99	94	75	101.5	84	98.5	80.5	101	89	122.5	84	105.5	64
AT1G07640	87	63	104	80.5	78	84.5	93	95.5	83.5	130.5	96	58.5	72	82.5	64.5	74.5	74	72.5	79.5	84	119.5	91	62.5	47	56	63.5	79	27
AT1G07650	123.5	113	84.5	84.5	70.5	84.5	92	150.5	77	112.5	77	128.5	87.5	110	102.5	106.5	134.5	108	127	89	89	87	127.5	65	51	106.5	116.5	88
AT1G07660	36	33.5	42.5	37	58.5	56	56	44.5	55	43.5	40.5	26	75	36	42.5	59	46.5	47.5	52	38	39.5	54	15	67.5	32	29	65.5	45.5
AT1G07670	411.5	396	382	339.5	339	329	447	368	392	428	305.5	348	284.5	332	349.5	328	355.5	315	318.5	305.5	337.5	374	240.5	404	361.5	376.5	392	424
AT1G07700	64	60.5	34	52	62.5	62.5	34	73.5	50	72.5	43.5	58.5	57	46.5	45	53	45	60.5	57	51	53.5	37	50.5	59	22.5	59.5	37	51
AT1G07705	68.5	60.5	70.5	62.5	70.5	74.5	70.5	63.5	51.5	47	43.5	97.5	55	58	62.5	54	38.5	55	55	57	60.5	71.5	62.5	67.5	76	69.5	62.5	61
AT1G07710	1	15	15.5	9	2.5	4.5	10.5	5	6.5	0	5	13.5	3.5	3	4	4.5	4.5	3.5	11.5	8	7	3	15	9.5	13.5	8	3	9.5
AT1G07720	3.5	8.5	6	19	36.5	36	32	18.5	10.5	0	12.5	9.5	8	11.5	7	5	7	7	6	18	13.5	9.5	0	7.5	9	10.5	3	2.5
AT1G07740	1	0	0	7.5	7	7	6	9	6.5	0	0	0	6	6	4	3.5	15	5.5	5	6	7	9.5	0	4.5	0	9	5	7
AT1G07745	28.5	19.5	13.5	15	15	13.5	34	21	22.5	22.5	7	0	16	13.5	20	22.5	10.5	29	17	14.5	27	10.5	38	19.5	5.5	22.5	12.5	17
AT1G07750	226.5	243	308.5	282	287	253	276	256	308.5	324.5	302	196	301	329.5	294.5	261.5	259	220.5	243	249	246	232	182	308.5	251	317.5	259	273
AT1G07770	755.5	652.5	941.5	916.5	854	907.5	975.5	685.5	878.5	673	836.5	744.5	1151	856.5	911.5	989.5	874	1185.5	1050.5	978	997	850.5	808	844	783	961	870	719
AT1G07780	22.5	31	32	39.5	27	29	29	18.5	39.5	30	22.5	21.5	25.5	40.5	33.5	18	29	32	21	26.5	28	24.5	0	57	18	48	59.5	58.5
AT1G07790	74.5	86.5	72.5	100.5	105	90	123.5	98	101	54	112	97.5	142	136.5	145	153.5	116.5	146	129.5	106.5	96	63.5	101	107	107	97	150	70.5
AT1G07795	6.5	4.5	4.5	2.5	0	1	2.5	5	5.5	0	5	0	2.5	9.5	3	5	3	1	1	0	2	0	0	4.5	5.5	0	10.5	0
AT1G07810	246	226	210	278	259	268	246	223	228.5	256	279.5	175	199.5	244.5	259	191.5	209	199	191.5	269.5	209	264.5	225	224	237.5	222	232	211.5
AT1G07820	153	153	196	206.5	195.5	187	211.5	214.5	198	256	214	175	295	212	196	236.5	180.5	272	213.5	198	156.5	206.5	182.5	210.5	255.5	225.5	188	194.5
AT1G07830	62.5	105.5	96.5	93	84.5	103.5	110	52.5	106	76	131.5	93	106.5	84.5	85.5	72.5	70.5	114.5	86	74	99.5	75	114	80.5	70.5	85.5	82.5	61
AT1G07840	54	31	52	40.5	49.5	42.5	81.5	38.5	46	58	69.5	50.5	69.5	58	72	70.5	68.5	76	66.5	61	67.5	64	88	43.5	46	71.5	56	72.5
AT1G07870	56.5	56	79.5	79	112.5	62.5	76	94	79.5	76	109	88.5	65.5	98	72	60	52	43.5	61	73.5	58	85.5	38	47	102	48	88	51
AT1G07880	28.5	15	15.5	39	47	62.5	35	52.5	44.5	72.5	40.5	34.5	50.5	35	24.5	30	23.5	34	26.5	24.5	39.5	32	26	37	80.5	16.5	32	24.5
AT1G07890	3436.5	3088	3880	3215.5	2862	2862	3352	3352	3088	3699	3436.5	3547.5	3547.5	3124.5	3547.5	3352	3352	3765	3352	3018.5	3298.5	2639.5	3018.5	3124.5	3215.5	3124.5	3215.5	3380
AT1G07902	1	10.5	6	2.5	3.5	7	0	7	3	0	7	9.5	3.5	8	2	4.5	3	7	4	4.5	4.5	2	0	0	0	8	12.5	0
AT1G07910	70.5	94	92	98.5	107	100.5	115.5	102	103.5	65.5	71.5	97.5	64.5	93	77	80.5	91	85.5	78	103	105.5	98.5	76	59	102	89	76.5	85.5
AT1G07920	736.5	596	855.5	706.5	767.5	701.5	874	775	728	677.5	821.5	872	971	851.5	831.5	871	859	1066.5	896.5	725	765.5	790	695	760.5	739.5	818	857.5	673
AT1G07930	1086	1010.5	1119	1119	1115	1154.5	1281.5	1252	1233.5	1260	1071.5	1236	1112.5	1181.5	1154.5	1137.5	1175.5	1365	1175.5	1143	1156.5	994	1014	1140	1092	1187.5	1413.5	1187
AT1G07937	1	0	0	3.5	5	0	6	0	4.5	0	0	0	3.5	1	3.5	1.5	3	2.5	1	3.5	4.5	1	0	0	9	1	0	7
AT1G07940	624.5	532	597	631	660.5	693	701	607	660.5	610	682.5	532	808.5	708	739.5	666.5	805.5	844.5	764	635	665	706	533.5	672.5	585.5	730.5	613.5	522.5
AT1G07950	62.5	72	45.5	53	47	44.5	61.5	38.5	42.5	43.5	12.5	34.5	50.5	54	54	48	29	51	45	47.5	41.5	36	38	63	37	67.5	62.5	67.5
AT1G07960	82.5	94	84.5	70.5	82.5	86	56	95.5	77	47	77	93	105.5	60.5	89.5	90	94	105	116.5	84	97.5	92	141	154	61	82.5	94	97
AT1G07970	52	42.5	36.5	50	54	56	60.5	42.5	59	65.5	64	26	50	68	64.5	36.5	63.5	45	54	39	55.5	40.5	15	53	13.5	56	65.5	56
AT1G07980	39	47	43	35	35	46	46	56	32	58	15	62	56	61	41.5	51.5	43	38.5	32	33	37.5	41.5	15	35	18	39.5	18	45.5
AT1G07985	3.5	6	4.5	47	39.5	55	21	18.5	26.5	10	17	30	16	20	11.5	19.5	7	10.5	7	30	25	27	0	13.5	0	5	7.5	2.5
AT1G07990	224	279.5	208	192.5	197	197	163.5	203.5	207	215	256	110.5	214.5	221.5	197.5	217	207	185.5	197	210	180	197	76	212.5	168.5	224	188	217.5
AT1G08000	19.5	8.5	4.5	17.5	19	32	27.5	18.5	28	12.5	7	6	25.5	22.5	24.5	23.5	22	21.5	19.5	23.5	19	17	50.5	25.5	9.5	26	18	14.5
AT1G08010	46.5	35.5	70.5	40.5	34.5	57	60.5	36.5	41.5	76	51	47	56	53	54	56	70.5	50	62.5	53.5	55.5	32	15	41.5	61	59.5	29	58.5
AT1G08030	104.5	113	56	96.5	87.5	99.5	92	69.5	98.5	65.5	43.5	71.5	77	68.5	76	107	99.5	96	99	96	67.5	93.5	101	91	122.5	103.5	91	114
AT1G08040	106	116.5	94	136	132.5	119.5	122.5	106	125	61.5	98.5	102	119.5	98.5	91.5	119.5	108.5	119.5	145	102	125	130	62.5	126.5	148.5	87	99.5	134
AT1G08050	18	35.5	27	37.5	36	32	30	48.5	30	54	45.5	21.5	36	46.5	36	29	22	20	23.5	30	22.5	37	50.5	25.5	18	22.5	32	30
AT1G08060	82.5	108	49.5	64.5	68.5	64	67	48.5	39.5	109	77	58.5	33	93	73	64.5	50	57.5	70.5	69.5	55.5	61.5	62.5	59	41.5	76	73.5	88
AT1G08070	1	2.5	0	2.5	0	2	0	2	3	0	0	0	0	2	0	1	1	2	2.5	2	1	3	0	4.5	0	2.5	3	4.5
AT1G08090	18	24.5	15.5	4.5	8	1	7	5	10.5	12.5	22.5	9.5	30	31	32.5	17	4.5	13.5	14	10	9.5	12	0	7.5	13.5	2.5	5.5	19.5
AT1G08110	188	196	190.5	195.5	206.5	224	274	167	198	324.5	200.5	179	240.5	198	193.5	203.5	207	210.5	199	210.5	222	215	153	231.5	183.5	214.5	208	197
AT1G08125	70.5	58.5	47.5	57	56	44.5	56	28.5	43	26	59	80	66.5	56	49.5	62.5	78	63.5	65.5	44.5	57	61.5	101	31	61	53	65.5	56
AT1G08130	111	98.5	92	74	94	104	87.5	95.5	98.5	109	85	50.5	82.5	102	96.5	98.5	116.5	126	96	106	108.5	99	62.5	80.5	70.5	79	108	122
AT1G08160	97	105.5	92	75	78	95	115.5	100	83.5	98.5	85	106.5	136.5	105	92	112.5	112.5	97.5	105	95	116.5	75	101	91	85.5	85.5	103	116.5
AT1G08165	1	2.5	0	1	2	1	4	0	2	0	9.5	0	2	1	3	3.5	6	3.5	3.5	0	0.5	0	0	4.5	0	0	0	2.5
AT1G08173	6.5	13	15.5	1	1	0	4	2	10.5	7	17	0	12.5	6	7	9	3	7	5.5	1.5	0.5	6	15	2.5	5.5	12.5	5.5	7
AT1G08180	5	4.5	6	19	14	13.5	13	12.5	10.5	16	17	10	21.5	13.5	12.5	19	6	8	7.5	10.5	10.5	23.5	26	7.5	27	10.5	32	7
AT1G08190	486	476.5	514	480.5	568.5	463	495	603.5	557.5	403	533.5	734	332.5	497.5	472.5	319.5	384	428.5	473.5	567	590	538	475.5	471.5	443.5	460.5	358	565
AT1G08200	1076.5	1147	1304.5	1225	1330	1304.5	1156.5	1225	1252	1218.5	1218.5	1401.5	1022	1066.5	1025.5	1218.5	1165	1181.5	1156.5	1181.5	1225	1290.5	1271.5	1290.5	1324.5	1260	1281.5	1238
AT1G08210	39	56	47.5	45.5	45	47.5	62.5	46.5	40.5	65.5	51	42.5	41.5	46.5	51.5	51.5	48.5	64.5	70.5	63.5	53.5	55	101	47	41.5	42.5	37	27
AT1G08220	30	6	20	39	21.5	29	30	27	38	30	15	6	24.5	25.5	24.5	34	32	30	32	23.5	21.5	22.5	0	21.5	46	24.5	15.5	9.5
AT1G08230	46.5	47	29	60	60	62.5	44.5	61.5	56	68.5	17	34.5	42.5	27	37.5	39.5	36.5	38	34.5	50.5	58.5	51.5	26	39	46	21.5	37	27
AT1G08260	88	89	96.5	86.5	100	80.5	79	67.5	94	80	85	38.5	30	79	85.5	43.5	70.5	58	78.5	97	97.5	91	88	111.5	117.5	164.5	99.5	94.5
AT1G08270	8	2.5	2.5	3.5	1	3.5	3.5	3.5	9	0	5	10	8	1	2.5	1	3	2.5	3.5	4.5	3.5	3	0	0	5.5	2.5	5.5	0
AT1G08280	21	24.5	29	19	29	18.5	28	22.5	41.5	16	22.5	47	28.5	31	27	25.5	25.5	41.5	23.5	18	32	38	50.5	41.5	22.5	38	32	40.5
AT1G08283	3.5	10.5	4.5	8	4.5	3.5	2.5	0	6.5	7	12.5	10	8	2	4.5	6	3	4.5	4.5	7	6	2	15	7.5	0	2.5	7.5	22
AT1G08290	29	24.5	10.5	27	31	62.5	25	42.5	28	16	22.5	30	18.5	16.5	20	22.5	10.5	16	13.5	31	38.5	26	26	41.5	27	27.5	23.5	30
AT1G08300	8	8.5	6	8	8.5	6	14	7	9	16	9.5	0	9.5	20	7	5.5	1	8.5	9.5	7	10.5	7	38	2.5	0	8	10.5	9.5
AT1G08310	6.5	15	6	10	8	10.5	4	3.5	15	58	12.5	0	14.5	8.5	12.5	12.5	4.5	19	15.5	11.5	7	5.5	38	25.5	13.5	5	0	7
AT1G08320	100	159	123.5	90	96	56	69.5	119.5	67.5	137	93	102	139	114	121.5	128.5	107	110	131.5	85	85.5	75	88	117.5	41.5	84.5	42.5	94.5
AT1G08340	25.5	49.5	22.5	37	41.5	26.5	45.5	42.5	26.5	19.5	48.5	58.5	39.5	39.5	48.5	29	33.5	20	28	33	31	23.5	15	13.5	37	18	29	48.5
AT1G08350	65.5	29	27	67.5	51.5	41.5	26.5	34.5	39.5	51	51	42.5	38	50	41.5	58	33.5	55.5	42.5	50.5	47.5	35	26	49	70.5	45.5	42.5	32.5
AT1G08360	805.5	787	929	1040	1050.5	1122	1175.5	741	1140	1076.5	986	866.5	1061	901.5	971	994	1018.5	1214	1022.5	994	963	983	868.5	1076.5	1345.5	1050.5	1061	958.5
AT1G08370	147	119	143.5	110	126	131	115.5	152	125	198	93	71.5	163.5	138	161	174	152	163	135	160	126	117.5	88	124.5	112.5	125	88	111
AT1G08380	47.5	15	40.5	48	38.5	33	57	56	61.5	26	48.5	38.5	79	30	37.5	59	81.5	43.5	27.5	80	70.5	84.5	38	61	41.5	42.5	39.5	40.5
AT1G08390	3.5	6	6	4.5	4.5	4.5	1.5	0	4.5	0	5	0	4.5	6	3	3.5	0	2.5	2.5	0	1	9	0	0	0	5	0	0
AT1G08400	30	22	45.5	25	29.5	26.5	28	21	26.5	0	35.5	26	29	28	24.5	24.5	35	30	34	24.5	25.5	31	26	31	0	31	10.5	51
AT1G08410	55	56	52	59	56	43.5	80	50.5	61.5	37	61.5	13.5	58.5	50	79.5	50.5	65.5	65.5	69	63.5	61.5	60	38	45.5	37	53	48	48.5
AT1G08420	260	224	279.5	214.5	217	232.5	189.5	237.5	186.5	295.5	238.5	304	146	225	208	176	188	175.5	203.5	203	244	196.5	182.5	261.5	313	236.5	265	191.5
AT1G08430	120.5	94	56	68.5	94	105.5	64.5	69.5	62.5	34	59	75.5	148.5	175	186	186	226.5	169.5	163	76	95	73	182.5	99	76	127	85	116.5
AT1G08440	0	4.5	4.5	17	16	24.5	3.5	3.5	1	0	0	0	1	1	0	0	3	0	0	5	4.5	11.5	0	4.5	5.5	6.5	3	0
AT1G08450	142.5	180	126	154	129.5	179	153	150.5	150	145	117.5	97.5	172.5	113	153.5	163	180.5	132.5	136	157	137.5	189	88	114	127.5	151	138	164.5
AT1G08460	85.5	49.5	68	64.5	71.5	53	83.5	60	75	51	54	42.5	67.5	86	59.5	81.5	43	71.5	56	83.5	80	58	153	85	80.5	85.5	45.5	27
AT1G08470	43.5	84	77	56	66.5	56	70.5	73.5	54	16	56	66.5	65.5	74	66.5	61.5	85	61	67.5	69.5	64.5	35.5	62.5	69.5	107	64.5	59.5	72.5
AT1G08480	228.5	212.5	287	292.5	300	268	306	436	251	186	229.5	175	389	272	287	364.5	278	347	321.5	291	303	229	338.5	285.5	179	174.5	274	200.5
AT1G08490	39	89	54	49	62.5	57	47	65.5	49	26	45.5	76	56	60.5	55	33	55	56	52	57	44.5	50.5	15	37	46	45.5	65.5	32.5
AT1G08500	40.5	47	38.5	52.5	59.5	62.5	33.5	77.5	60	80	56	66.5	39	32	39.5	57	39.5	35	63.5	58	52.5	38	50.5	65	85.5	72.5	82.5	27
AT1G08507	0	0	0	1	1	1	0	0	2	0	3	0	4.5	3	0	3.5	3	4.5	2	1	3.5	2	0	0	0	1	0	0
AT1G08510	414.5	323.5	397	327.5	348.5	382	407.5	312	322.5	368	329	329.5	347.5	378.5	350.5	385	349.5	373	375.5	354	347.5	340	392.5	305	345	375.5	384	368
AT1G08520	106	47	79.5	103.5	87.5	90	92	108	87	37	104	58.5	61	91	77	79	99.5	79	84	119.5	113	114.5	62.5	109	96.5	128.5	97	59
AT1G08530	19.5	31	27	28	42.5	42.5	24.5	27	25.5	19.5	22.5	30	30	39.5	26	24.5	23.5	31	41.5	40.5	26.5	31	26.5	15	22.5	21.5	23.5	32.5
AT1G08540	29	35.5	34	26.5	21.5	29	32	38.5	29	10	45.5	21.5	33	17	21.5	40	39.5	23.5	31	43.5	26.5	32	50.5	31	22.5	26	18	45.5
AT1G08550	10.5	8.5	6	17.5	11.5	18.5	14.5	2	18	12.5	22.5	6	14	21	9.5	15	12.5	14	10	17	18	21.5	26.5	15	27	20	5.5	11.5
AT1G08560	59.5	56	65.5	91	73	84.5	84.5	92	55	47	45.5	21.5	47.5	63.5	66.5	45.5	68.5	65.5	54	56	64.5	86	62.5	29	102	55	50.5	97
AT1G08570	210	193.5	205	322.5	339	381.5	348	337.5	306.5	238.5	294	418.5	183.5	219.5	213.5	233.5	179.5	205	170.5	275.5	209.5	319	209	216.5	244	200.5	188.5	217.5
AT1G08580	102.5	63	43	84	93	80.5	92	83.5	89.5	68.5	126	88.5	106	91	82.5	92.5	103.5	110	102	68.5	83.5	78	50.5	82.5	81	98.5	88	106
AT1G08590	1	19.5	2.5	2.5	4.5	1	4.5	3.5	2	10	15	6	3.5	3.5	9	9.5	9	11.5	6	2.5	4.5	3.5	0	11.5	27	3.5	5.5	11.5
AT1G08600	162	110.5	173	156	151	144	142	161	133	190.5	106.5	93	107.5	163	163	133.5	119.5	129.5	164	167.5	160.5	168.5	88	194.5	183.5	146	172.5	172.5
AT1G08610	2.5	4.5	15.5	4.5	7	14.5	6	10.5	3	0	0	10	10.5	8.5	9	10.5	18.5	7	9.5	6	6	8	50.5	7.5	0	6.5	12.5	30
AT1G08620	117	116.5	126	140.5	116.5	118.5	149	119.5	114	83.5	120.5	165	105	106.5	119.5	108.5	110	112.5	109	133.5	112	142.5	127.5	150	117.5	97	108	116.5
AT1G08640	68.5	74.5	47.5	64	58.5	72.5	51.5	58	64.5	87	54	42.5	68.5	67.5	60	65.5	70.5	71.5	64.5	55	75	72	38	80.5	91	64.5	71.5	88
AT1G08650	251.5	287	243	147	149	171.5	211.5	240	196.5	315	195.5	289	163.5	104.5	128.5	130	127	151.5	163.5	124.5	129.5	168.5	101	170.5	164	203	214	219.5
AT1G08660	153	135	152	129	130	163	177	131.5	111	190.5	193	138.5	142	132.5	133.5	162	132.5	194.5	168.5	147.5	127	126	101	161	127.5	139.5	141.5	140.5
AT1G08670	30	17	24.5	19.5	15	17	10.5	18.5	16.5	26	22.5	47	14.5	16	21.5	15	20.5	25.5	17	11.5	12.5	16	15	13.5	22.5	36.5	34.5	27
AT1G08680	139.5	116.5	104	114	119	116.5	111	142.5	114	94	99	84	116.5	133.5	151	123.5	129.5	101.5	105	121.5	154	111.5	141	140	96.5	106.5	116.5	88
AT1G08687	2.5	6	10.5	2	0	0	4	0	3	0	0	0	1	1	2	2	1	3.5	6	3.5	2	4.5	0	2.5	0	6.5	3	2.5
AT1G08700	61	63.5	79.5	77.5	59.5	59	59	48.5	44.5	90	40.5	50.5	91	91	60	55	103.5	62	83	50.5	78	50.5	26.5	55	27	63.5	65.5	59
AT1G08710	40.5	17	24.5	29	24.5	32	36.5	36.5	28	0	33.5	26	40.5	39.5	31.5	39.5	30	29	32	33	25.5	35.5	38	29	41.5	38	56	35
AT1G08720	112.5	72	84.5	112	106	107	151.5	96	105	65.5	109	142.5	82.5	94	86.5	69.5	105	80.5	82.5	107	96	97.5	50.5	43.5	102	90	59.5	97
AT1G08730	1	2.5	22.5	5	5	12	4	0	6.5	7	9.5	10	3.5	8.5	13.5	3.5	9	6	6	3.5	9	6	0	4.5	13.5	2.5	10.5	4.5
AT1G08750	49	22	47.5	46.5	45.5	46.5	41.5	29	38	0	51	47	31	41.5	43.5	51.5	48.5	49	40.5	49	45.5	54	26.5	51	91	31	65.5	53.5
AT1G08760	94	113	154	80	79	86	112	83.5	97	98.5	96	97.5	98.5	100.5	99	94	119.5	78.5	97.5	90	109	98.5	62.5	85	102	97.5	116.5	100.5
AT1G08763	19.5	10.5	6	1	1	0	7	9	4.5	0	5	26	0	0	0	2.5	0	2.5	6	2.5	2	1	0	0	0	5	0	11.5
AT1G08765	9.5	0	0	1	2	3.5	1.5	0	1	0	3	0	2	5.5	1	0	0	5.5	1	3.5	3.5	1	0	2.5	9.5	0	5.5	0
AT1G08770	50.5	54	52	53	36	47.5	51.5	32	33	34	38	17.5	77	60.5	53	78	43.5	43.5	59	44.5	55.5	39.5	50.5	13.5	51	58	12.5	35
AT1G08780	47.5	26.5	43	51	44	52	55.5	60	70.5	37	45.5	34.5	79	55.5	57	50	45	72.5	52.5	46.5	55.5	51.5	62.5	63	32	64.5	48	100.5
AT1G08800	111	207	96.5	135	145	105.5	76	136	115	127	117.5	102	64.5	86.5	105	81	110	64.5	115.5	136	99.5	96.5	88	137.5	148.5	127	116.5	114
AT1G08815	5	2.5	2.5	1	0	0	3.5	7	1	0	0	0	3.5	3	1	0	0	0	1	1	2	2	0	2.5	0	1	0	0
AT1G08820	223.5	261	216.5	199.5	214.5	232.5	253	198.5	200	170.5	232	234	224	193.5	205	215	155	193.5	218	218.5	187	237.5	88	224	251	233	108	183.5
AT1G08825	12.5	6	17	9.5	9.5	9.5	12.5	12.5	16.5	0	15	0	9.5	8.5	5.5	12.5	18.5	8.5	8.5	22.5	7	12	15	17	5.5	32	32	22
AT1G08830	277	337.5	265.5	205.5	193.5	179	264.5	244.5	224	215	246	229.5	224.5	227	183.5	224	238.5	230.5	216.5	169.5	159.5	191.5	324	170.5	237.5	335.5	341	339
AT1G08840	18	31	43	42.5	39.5	57	33	18.5	47.5	12.5	56	17.5	34.5	34	30	23.5	36.5	43.5	46.5	42.5	36	34.5	0	43.5	61	36.5	42.5	45.5
AT1G08845	15	19.5	4.5	10.5	18	17	16	12.5	6.5	12.5	22.5	13.5	20	12.5	12.5	10.5	12.5	9	19.5	10	7	9.5	0	6	18	12.5	10.5	14.5
AT1G08865	13.5	13	20	13.5	13.5	8	3.5	9	16.5	22.5	12.5	6	10.5	1	14	8	14	12.5	6.5	3.5	10	1	0	15	5.5	5	18	24.5
AT1G08875	0	0	0	3.5	0	0	0	0	4.5	0	0	10	1	0	4	2	6	2	2	0	1	3.5	26.5	0	0	6.5	0	0
AT1G08880	168.5	177.5	159.5	146	202.5	146	165	130	196	175	181.5	168.5	277	160	182.5	221	210	205.5	197	156	175	186.5	141	190	85.5	193.5	185.5	153.5
AT1G08890	84	77	87	99	118.5	131	72.5	90	120.5	105.5	96	175	67	59	93	95	87	85	87	104.5	123.5	126	88	93.5	158.5	87	82.5	85.5
AT1G08900	5	8.5	2.5	4.5	9.5	12	10.5	9	4.5	0	12.5	21.5	4.5	7	7	6	4.5	6.5	12.5	10.5	8	12.5	0	13.5	9.5	5	3	14.5
AT1G08903	5	8.5	8.5	6	10.5	8	9	7	0	0	0	38.5	15.5	11	11.5	5.5	7	13.5	10.5	9	4.5	7.5	15	2.5	0	12.5	7.5	2.5
AT1G08910	104.5	56	123.5	67.5	78	67.5	62.5	79.5	60.5	98.5	131.5	66.5	64.5	83.5	77	90	53.5	92	84.5	84.5	99	81.5	88	82.5	85.5	71.5	62.5	67.5
AT1G08920	195.5	142.5	92	202.5	229.5	266.5	125	184.5	178	155	112	203.5	175.5	147	145	119.5	112.5	86.5	120.5	189	165.5	205	50.5	133.5	117.5	106.5	141.5	128.5
AT1G08930	221.5	308.5	217	126	140.5	98	97	236.5	150	206	195.5	191.5	192.5	162.5	209.5	179	126	129.5	143.5	148.5	94	147.5	153	131.5	91	123.5	185.5	202.5
AT1G08940	25.5	72	36.5	46.5	64	37	26.5	38.5	44.5	19.5	43.5	84	59	52.5	40.5	44.5	29	31	39.5	38.5	31	38.5	26.5	39	37	32	15.5	38
AT1G08957	0	2.5	10.5	3.5	5.5	2	12.5	9	4.5	0	0	10	11.5	3.5	4.5	2	3	5.5	5	3.5	2	4.5	0	9.5	0	2.5	10.5	9.5
AT1G08960	54	38	34	37.5	44	55	26.5	22.5	39.5	47	31	54.5	27.5	17	31.5	37	50	24.5	47	36	50.5	49	50.5	29	76	20	48	22
AT1G08970	130.5	180	147.5	159	165.5	180	202.5	124	163	137	161.5	84	173	150	144	112.5	168.5	141.5	141	173	162	145	167.5	135	189	128.5	153	168.5
AT1G08980	27	13	32	28.5	31	41.5	30	24.5	35	0	5	30	19.5	26.5	24.5	27	17	19	22.5	27.5	35	25.5	38	23.5	0	12.5	10.5	2.5
AT1G08990	71.5	94	104	62.5	70	84.5	67.5	83.5	69	94	35.5	38.5	105.5	77	106.5	77	57	58	76	56	62.5	80.5	38	35	70.5	63.5	32	45.5
AT1G09000	50.5	54	47.5	42.5	60	60	49	71.5	57.5	76	61.5	38.5	57	39.5	44.5	55	36.5	47.5	57	39	43.5	44.5	50.5	85	61	40.5	50.5	56
AT1G09010	183.5	159	179.5	153	146.5	181	173	154	180	155	184.5	138.5	130.5	170.5	161	172	161.5	168.5	165	193	233.5	212.5	182.5	161	143	182	178	179
AT1G09020	179	226	109	126	135	152	130.5	156.5	171	137	155.5	156	146	180.5	165	138.5	148.5	162	162	146	170.5	145	114	119.5	183.5	166.5	200.5	153.5
AT1G09040	25.5	17	8.5	12.5	10.5	12	13	7	8	0	17	10	12.5	10.5	14	14	9	17.5	15	10.5	12.5	9.5	0	9.5	13.5	26	10.5	7
AT1G09045	1	0	2.5	7	1	3.5	0	3.5	1	19.5	0	13.5	0	1	0	0	1	0	2.5	0	0	3	0	7.5	0	6.5	12.5	4.5
AT1G09050	10.5	10.5	13.5	19.5	10.5	7	11.5	7	3	12.5	25.5	17.5	10.5	12.5	16	12.5	3	10.5	13.5	12.5	21.5	21.5	0	39	37	9	5.5	27
AT1G09060	94	72	118.5	100.5	101.5	90	117.5	83.5	134	80	64	115	83.5	89.5	99	108.5	101.5	98.5	108.5	98	131	119.5	101	122.5	143	101.5	62.5	83
AT1G09070	210.5	257	228	178	175	179	187.5	219.5	201.5	226	196	169	279	273	216.5	241.5	241.5	176	202.5	178	140.5	190	101	161	112.5	173	116.5	194.5
AT1G09090	67.5	98.5	38.5	32	26	17	49.5	29	44.5	22.5	31	38.5	33	35	39.5	71.5	43.5	48.5	66.5	55	38	41.5	26.5	53	18	66.5	34.5	80
AT1G09100	109	96	99	130.5	124.5	121	142	87.5	107.5	105.5	82.5	93	137.5	152	134.5	127	118	127	111	114	141.5	89	101	101.5	61	121.5	150	103
AT1G09130	120.5	121.5	123.5	109	87.5	118.5	134.5	63.5	130.5	58	88	146	142.5	117.5	119.5	168	76	127.5	116.5	125	124.5	102.5	114	78.5	112.5	79	73.5	85.5
AT1G09140	386	337.5	305.5	278	233.5	240	242.5	298	289	256	288	239	289	290.5	263.5	302	292.5	300.5	313.5	245	272	272	101	196	225	262	238	288
AT1G09150	97.5	119	118.5	135	110	102	156.5	130	125	119.5	143.5	71.5	131.5	135	137	159	139.5	171.5	116	119.5	154	133.5	62.5	87	148.5	137.5	206.5	106
AT1G09155	2.5	4.5	6	5.5	6	10.5	4.5	7	0	7	5	0	4.5	8	5	7	0	3.5	2.5	8	2.5	11.5	0	0	13.5	1	15.5	0
AT1G09160	68.5	91	106.5	100	98	90	93	92	88	68.5	71.5	42.5	60	94	93.5	80.5	101.5	77	92.5	91.5	102	83	26.5	82.5	76	72.5	108	67.5
AT1G09170	39	69.5	29	23.5	19.5	17	26.5	29	25.5	19.5	28	66.5	12.5	23.5	30	22.5	10.5	17	28	20.5	20.5	24.5	88	17	9.5	24.5	10.5	14.5
AT1G09190	6.5	2.5	4.5	3.5	5.5	8	6	3.5	2	0	5	0	4.5	4.5	5	2.5	1	8	8	3.5	7	1	0	2.5	0	3.5	0	17
AT1G09195	40.5	47	20	28.5	44	24.5	23.5	36.5	22.5	30	38	30	18	18	37	16	17	29	24.5	23.5	17	22.5	0	29	41.5	43.5	23.5	38
AT1G09200	150	132.5	177	145	160.5	138	192.5	136	181.5	246	164	284.5	268.5	198	190	232	157	194	168.5	124	156.5	145	282.5	198	277	161	210.5	157
AT1G09210	857.5	872	1040	966	1010.5	1066.5	1165	949	1022.5	835	964.5	777	992.5	1063	1053	1018.5	953.5	1156.5	1053	994.5	1010.5	938.5	634.5	915.5	978	1025.5	958.5	915.5
AT1G09220	0	6	0	2.5	2	0	0	2	3	0	5	0	0	3	2	1.5	0	0	0	0.5	5.5	0	0	0	5.5	0	0	2.5
AT1G09230	40.5	26.5	70.5	38	32	61.5	49	24.5	28	30	20	30	44.5	47.5	43	44.5	48.5	59.5	39.5	36	43.5	29	15	35	22.5	43.5	42.5	40.5
AT1G09235	3.5	0	2.5	5.5	13.5	28	6	9	12.5	16	0	13.5	4.5	5.5	8	3.5	17	9.5	5	7	9.5	12	0	11.5	13.5	5	0	4.5
AT1G09250	62.5	63.5	36.5	49	45.5	33	55.5	54	74	19.5	82.5	97.5	58	51.5	59.5	50.5	52	58	32	48	31	37	26.5	67.5	56	43.5	62.5	56
AT1G09270	309.5	345.5	304	241.5	229.5	225	345	298.5	302	198	288	248.5	265.5	263.5	273.5	267.5	261.5	257.5	257.5	280	255	251	255.5	212.5	362	327.5	242	253
AT1G09280	76.5	77	77	104	89.5	76	107	104	95	16	71.5	84.5	82.5	91	91	82.5	76	87	85.5	90	96	72	182.5	85	76	87	85	64
AT1G09290	19.5	15	24.5	16	21.5	33	31	36.5	25.5	22.5	43.5	6	28.5	31	20	34	25.5	41.5	22.5	21.5	17	27.5	15	31	13.5	13.5	39.5	22.5
AT1G09300	25.5	33.5	20	43.5	32	37	39.5	32	53	12.5	22.5	71.5	42	34	31	31	23.5	31	25	27	28	29	15	41.5	18	27.5	21	48.5
AT1G09310	19.5	6	4.5	24.5	23.5	26.5	18.5	10.5	12.5	19.5	25.5	21.5	2.5	7	8	5.5	15	6	5	15.5	9.5	13.5	0	9.5	32	6.5	3	9.5
AT1G09320	29	22	17	28.5	20.5	30.5	22.5	36.5	20	0	5	26	15.5	11.5	26.5	15	18.5	16.5	17.5	23.5	21.5	18.5	38	19.5	5.5	10.5	23.5	32.5
AT1G09330	115.5	123.5	159.5	115	116.5	132.5	72	87.5	116.5	167	101.5	110.5	85.5	85	110	120.5	164.5	166.5	129.5	127.5	127.5	119.5	38	109	65.5	141.5	123.5	131.5
AT1G09340	33	26.5	34	26.5	20	9.5	22.5	56	30	7	28	34.5	30	19.5	31.5	34	33.5	32	24.5	34.5	28	32	0	29	18	26	26	19.5
AT1G09350	61	47	40.5	32.5	28	44.5	36.5	60	49	40.5	45.5	26	67.5	46.5	41.5	68.5	96	43.5	45.5	51	44.5	56	15	43.5	51	36.5	91	56
AT1G09380	2.5	2.5	0	5	2	1	2.5	0	0	0	0	0	1	6	1	3.5	0	0	0	1	0	2	0	0	0	0	0	2.5
AT1G09390	39	49.5	36.5	25.5	24.5	34.5	50.5	29	30	47	35.5	21.5	43.5	39.5	41.5	45.5	50	38	40.5	45.5	44.5	46.5	38	23.5	18	27.5	26	35
AT1G09410	0	0	6	2	2	1	8	3.5	0	0	3	0	0	0	2.5	0	3	2	2.5	1	1	1	0	4.5	0	1	0	0
AT1G09415	8	15	20	17	10	12	16	10.5	21.5	0	7	10	18	8.5	6	12.5	30	14	10.5	14	13.5	12.5	0	15	9.5	8	15.5	7
AT1G09420	13.5	10.5	8.5	19	20	16	21	10.5	19	16	17	17.5	8	11.5	12.5	9.5	17	12.5	11	11.5	12.5	18.5	0	31	13.5	15	15.5	2.5
AT1G09430	350.5	390	321.5	283	268.5	300	283	356	350.5	552.5	259.5	425	305	338.5	303	329.5	298.5	282	310	339.5	317.5	302	295	266.5	261	313.5	366.5	331
AT1G09440	29	33.5	15.5	15.5	21.5	17	40.5	16.5	34	47	17	34.5	34.5	28	22.5	19	36.5	15	22.5	26.5	19	23.5	0	33.5	13.5	24.5	45.5	14.5
AT1G09450	10.5	15	6	16	17	17	18.5	14.5	14	16	9.5	10	5	14	11.5	11.5	12.5	15	11.5	15	13.5	12	0	4.5	5.5	6.5	21	14.5
AT1G09460	104.5	35.5	72.5	64	46.5	76.5	84.5	40.5	54	87	56	50.5	48.5	64.5	66.5	73.5	39.5	70.5	62.5	71.5	39.5	33	76	59	41.5	61	59.5	40.5
AT1G09467	9.5	10.5	15.5	5.5	8	14.5	0	0	1	10	5	10	2	1	1	0	1	4.5	0	0	2.5	9	0	9.5	0	2.5	5.5	9.5
AT1G09470	10.5	8.5	6	16	20.5	26.5	11.5	16.5	15	0	5	6	17	21	18	11.5	9	8.5	16.5	14.5	19	25.5	0	9.5	9.5	9	21	17
AT1G09480	12.5	13	6	10	9.5	0	7	9	3	10	15	6	9.5	5.5	9	7	4.5	4.5	3.5	5	4.5	4.5	63	2.5	5.5	0	7.5	2.5
AT1G09490	37.5	26.5	24.5	52.5	51.5	55	30	27	46	98.5	51	34.5	44.5	46.5	44.5	28	40	32	49	40.5	38	43.5	101	31	27	36.5	39.5	35
AT1G09520	33	29	34	35	23.5	26.5	57	9	25.5	10	35.5	30	48.5	46.5	36.5	35	25.5	27.5	32	36.5	28	30	63	29	0	9	18	11.5
AT1G09530	3.5	4.5	4.5	8	9.5	12	9	5	3	34	5	6	3.5	4.5	4.5	7	12.5	2	5.5	5	5.5	5.5	15	11.5	9.5	1	0	0
AT1G09540	37.5	19.5	22.5	9	10	6	14.5	21	10.5	12.5	0	17.5	22.5	14	17	27	10.5	14	25.5	25.5	20	13.5	15	13.5	22.5	8	26	9.5
AT1G09560	1165	1114.5	971.5	1063	1148	1007	858.5	1496.5	1105.5	1314.5	967.5	999.5	1682	1442.5	1844	1912.5	1347	1383	1451	1260.5	988.5	774.5	1297.5	1147	941.5	964.5	837	871
AT1G09570	352	297	323.5	341	330.5	307.5	328	335	309.5	337.5	377	220.5	268	347.5	347.5	275	279.5	349.5	324.5	377	400.5	385	168	393	368	330.5	325.5	263
AT1G09575	5	4.5	2.5	6	8.5	4.5	6	10.5	5.5	7	3	0	8	4.5	5	4.5	4.5	3.5	1	5.5	6	8	0	2.5	32	8	3	9.5
AT1G09580	29	13	52	40.5	38.5	39.5	53	42.5	41.5	54	40.5	10	43	37	24.5	53	46.5	45.5	40.5	36.5	34	34.5	15	17	18	36.5	50.5	27
AT1G09590	635	626.5	738.5	723	701.5	706	754.5	780.5	706.5	695	824.5	701	862.5	677.5	656.5	701	626.5	922.5	717	602.5	715.5	643	564.5	783	740	677.5	690.5	787
AT1G09600	3.5	0	2.5	7	4.5	12.5	10	5	4.5	0	9.5	0	0	6	9	9	10.5	2	3.5	10	10	9	0	11.5	13.5	10.5	0	14.5
AT1G09605	21	33.5	8.5	2	5	0	4.5	7	3	10	7	6	15	9.5	15	12.5	6	4.5	15.5	1	1	4.5	0	0	5.5	8	5.5	4.5
AT1G09620	346.5	263.5	402	364.5	394.5	438	404	329	388.5	251	308.5	285	286.5	385	370.5	315	343	342.5	337.5	364.5	409.5	416	392.5	450	457.5	414	451.5	373
AT1G09630	91.5	79	84.5	97.5	105.5	95	105	96	75	94	99	62.5	101.5	90.5	86.5	73.5	99.5	91	78.5	78	76.5	86	88	51	71	63.5	126	116.5
AT1G09640	901.5	1040	1018.5	1050.5	971	1143	1009.5	1025.5	971.5	941.5	937	780.5	974	898.5	1000.5	986	1040	1018.5	1009.5	1018.5	1086	1088	1105.5	1096	999.5	994	1022	1012.5
AT1G09645	56.5	86.5	82	65.5	60	52	56	73.5	46	47	22.5	62.5	58.5	55.5	57	78.5	50	65.5	61	60	46	41.5	26.5	65	81	50	76.5	48.5
AT1G09660	127	137	111	120.5	94	127	103.5	98	91	119.5	96	102	156	131.5	150	137.5	110	165	144	105.5	115	97.5	127.5	109	148.5	144.5	111	111
AT1G09680	9.5	2.5	2.5	6	2	6	3.5	0	4.5	0	0	0	3.5	8	5	2	7	2.5	2.5	3.5	3.5	1	0	2.5	9.5	1	3	0
AT1G09690	835	894	966	1108.5	1078	1218.5	1226.5	1061	1023.5	865	1054	882	1087.5	978	992.5	1050.5	892	1413.5	1054	927	975.5	957.5	844	1015	892	893	1099	916.5
AT1G09700	36	22	17	29	28	30.5	33.5	18.5	33	22.5	17	26	49.5	33	48.5	27.5	22	32	38.5	30	38.5	25.5	15	25.5	18	29	29	45.5
AT1G09710	47.5	29	8.5	24.5	21.5	30.5	35	32	20	40.5	31	26	18.5	35	25	30	22	23.5	31	22.5	32	15.5	0	25.5	18	24.5	18	22.5
AT1G09730	98.5	121.5	109	103.5	108.5	116.5	121.5	145	129.5	116	131.5	160.5	108	129.5	114	109.5	129.5	112	114	112	106.5	100	141	111.5	46	111.5	94	116.5
AT1G09740	277	294	256	297.5	264.5	194.5	197	286.5	222	264	209.5	382	396.5	320	331	297	175	229.5	243.5	204	165	167	240.5	251	102	190	189	263
AT1G09750	46.5	84	74.5	54	40.5	80.5	80.5	69.5	87	65.5	85	26	122.5	76	73.5	133.5	136	95.5	63.5	91	104	82	38	85	56	69.5	45.5	48.5
AT1G09760	150	123.5	123.5	154	153	118.5	145	142.5	171.5	155	226	169.5	177	139.5	153	156	180.5	178.5	161	153	170.5	149	309.5	165.5	313.5	146	168.5	166.5
AT1G09765	2.5	2.5	4.5	1	0	3.5	0	0	1	0	0	6	1	7	1	0	1	0	2	4.5	2.5	1	0	6	27	5	10.5	2.5
AT1G09770	348.5	363	313.5	396.5	378.5	364.5	414	332.5	425.5	325	275.5	294	327.5	383.5	387	348	403	360.5	389	429	434.5	410	196	296	509	488.5	433.5	385
AT1G09780	737	805	809.5	856.5	892	860.5	897	790	883	632.5	833.5	933.5	673	835	858.5	685	788.5	722	814	831.5	916.5	937	777	776	964.5	922.5	971	703
AT1G09794	8	8.5	10.5	10.5	12	12.5	16	21	12.5	16	12.5	10	23.5	10.5	16	17	7	10	6	11.5	4.5	5.5	0	4.5	9.5	16.5	12.5	9.5
AT1G09795	33	15	22.5	50	49.5	49	40	60	43	76	38	17.5	39	26.5	37.5	26	32	38	36	47.5	46	40.5	50.5	43.5	41.5	32	32	51
AT1G09800	18	8.5	8.5	12.5	23.5	10.5	21.5	29	6.5	7	38	0	12.5	8.5	15	19	6	19.5	19.5	16.5	14.5	13.5	15	6	5.5	5	12.5	0
AT1G09810	33	42.5	27	16	29	13.5	25.5	31	16.5	12.5	56	0	23.5	31	32	35	34	36.5	35.5	30.5	30	21	26.5	41.5	22.5	13.5	26	33
AT1G09812	0	6	2.5	2.5	0	6	2.5	0	5.5	19.5	7	17.5	1	3.5	3	3.5	6	2.5	4.5	2	1	5.5	0	0	18	10.5	3	2.5
AT1G09815	37.5	67.5	54	55	45.5	47.5	54	50.5	62.5	16	77	38.5	85	57	54	57	68.5	43.5	45.5	47.5	38	41.5	50.5	35	18	35	32	27
AT1G09820	10.5	26.5	6	15	11.5	14.5	14.5	10.5	10.5	12.5	17	34.5	10.5	11.5	16	18	12.5	10.5	11.5	12.5	20	15	38	6	5.5	18	18	4.5
AT1G09830	61	91	59	48	50	59	63.5	69.5	54	43.5	90.5	84.5	62.5	92	63.5	80	57	68.5	58	61	55	59.5	141	55	41.5	72.5	79	80
AT1G09840	267.5	243	217	288.5	311.5	309.5	278	258	316	242.5	229.5	203.5	292	257.5	257.5	264.5	311	289	307.5	293	287	267.5	443.5	309.5	296.5	271	242.5	264.5
AT1G09850	59.5	31	63.5	93	84	98	88	109.5	69	54	59	58.5	75	78	77.5	89.5	68.5	63.5	68.5	91.5	100	69.5	168	53	81	58	56	64
AT1G09863	2.5	13	0	2.5	6	4.5	1.5	0	2	16	0	6	0	1	0	1	0	2	5	0	1	4.5	0	9.5	0	1	3	9.5
AT1G09870	123.5	84	87	121.5	119	147.5	123.5	136	98.5	61.5	117.5	88.5	136	117.5	133.5	115	105	130.5	126	111	114	127	101	131.5	122.5	116.5	126	78
AT1G09880	10.5	6	6	6	7	8	15	10.5	11.5	7	5	13.5	9.5	8.5	5.5	7	7	2.5	5.5	10.5	7	8	0	2.5	0	8	5.5	11.5
AT1G09890	5	6	8.5	12.5	8	17	13	21	11.5	22.5	9.5	10	9.5	11.5	7	7	4.5	8.5	7.5	12.5	12.5	9	38	2.5	9.5	1	21	9.5
AT1G09900	9.5	15	22.5	15	15.5	7	16	12.5	14	12.5	25.5	13.5	18	16	16	10.5	4.5	17	12.5	21.5	16.5	11.5	0	11.5	9.5	21.5	5.5	7
AT1G09910	88.5	84	70.5	87.5	81	82	122.5	77.5	81	43.5	85	66.5	61	72	71.5	73.5	74	61	76	100	93	74	88	67.5	37	76	62.5	67.5
AT1G09915	9.5	4.5	4.5	7	4.5	10.5	1.5	18.5	10.5	23	0	0	2	0	5	1.5	4.5	4.5	5.5	1.5	2	2	0	0	13.5	3.5	7.5	14.5
AT1G09920	131.5	149.5	136.5	122.5	125	110	133.5	154	123.5	130.5	166.5	165	173	144	129.5	153	164.5	148.5	147	137	119.5	120.5	101	126.5	137.5	128.5	108.5	106
AT1G09925	18	13	27	10	9.5	6	4.5	5	6.5	40.5	25.5	62.5	9.5	5.5	8	7	10.5	9.5	12.5	13.5	4.5	4.5	15	4.5	27	3.5	5.5	24.5
AT1G09932	3.5	8.5	22.5	68.5	65.5	73.5	24.5	34.5	35	23	28	21.5	18	8	18	8.5	12.5	5.5	8	30	38	48	15	21.5	27	16.5	0	11.5
AT1G09940	54	51.5	29	57	59.5	46.5	65.5	65.5	60.5	12.5	56	66.5	55	60.5	58	40.5	55	37	45	44.5	56	43.5	50.5	45.5	91	66.5	37	59
AT1G09945	0	0	0	2.5	2	2	0	3.5	0	0	0	0	2	0	3.5	0	6	1	0	1.5	1	3	0	0	0	1	3	0
AT1G09960	52	54	87	85.5	84	82	85	65.5	64.5	43.5	82.5	66.5	54	60.5	56	51.5	65.5	67.5	58	58	77	86	50.5	45.5	107	50	48	35
AT1G09970	1013	1156.5	903.5	814	865	802	783	885	844.5	1002.5	1046.5	938.5	722	857.5	922.5	777.5	922.5	690.5	860.5	805	800.5	856.5	1115	705.5	764	738.5	726	938.5
AT1G09980	125	108	149.5	148.5	121.5	108	107	109.5	131.5	158.5	196	93	81	108	118.5	67.5	121.5	119.5	127	99.5	121	133	101	168.5	96.5	118	99.5	106
AT1G09995	43.5	22	40.5	22.5	22.5	21.5	31	24.5	14	10	22.5	13.5	11.5	19.5	22.5	26	20.5	33.5	29	26	28	21.5	0	25.5	9.5	29	23.5	14.5
AT1G10000	2.5	2.5	8.5	1	1	0	5.5	2	2	0	3	0	3.5	6	0	2	3	2	2.5	0	3.5	1.5	0	0	0	2.5	0	0
AT1G10020	42.5	40.5	38.5	36	31	34.5	39.5	27	28	65.5	12.5	54.5	44.5	37	38.5	33	22	36	29	30.5	27	26	15	45.5	13.5	27.5	21	40.5
AT1G10030	67.5	56	61.5	71.5	74	73.5	67.5	54	67.5	72.5	56	26	86.5	64.5	69.5	72.5	74	72.5	77	66.5	50.5	58	15	47	56	61	103	128.5
AT1G10040	21	22.5	13.5	20.5	16	3.5	9	22.5	32	19.5	7	10	10.5	16.5	18	19	18.5	18	22.5	17	18.5	16	0	9.5	13.5	10.5	10.5	45.5
AT1G10050	139.5	124	123.5	84	96.5	128.5	95	98	79.5	116	96	110.5	97.5	128.5	120.5	98.5	141.5	75	119.5	97	102	100	269.5	71.5	117.5	111.5	71.5	140.5
AT1G10070	37.5	35.5	15.5	8	15.5	17	16	12.5	14	51	17	42.5	4.5	8	6	17	9	16	9.5	10.5	15	14	0	19.5	13.5	15	12.5	14.5
AT1G10090	118.5	119.5	210	77.5	111	95	103.5	104	142.5	90	93	128.5	97.5	119.5	125	108.5	145	125	149	153	144	123.5	182.5	154	112.5	134	123.5	108
AT1G10095	33	17	8.5	12.5	16	14.5	22.5	14.5	14	19.5	12.5	17.5	22.5	11	13.5	15	15	18.5	11.5	16	12.5	15.5	0	15	9.5	21.5	18	14.5
AT1G10120	106	128.5	84.5	97.5	87.5	65.5	108	67.5	67.5	68.5	71.5	47	109.5	102	105.5	133.5	121.5	112	134.5	84.5	92.5	82.5	141	59	112.5	84.5	56	122
AT1G10130	179	207	217	214.5	215.5	213.5	172	212.5	203	211.5	219.5	142.5	131.5	169.5	199	177	209	197	174	212	203	178	225	163	198	229.5	232	168.5
AT1G10140	112.5	105.5	61.5	64	60	59	115	77.5	63.5	112.5	61.5	62.5	85.5	68.5	55	83.5	112.5	61.5	58	79	67.5	79	38	71.5	46	43.5	42.5	59
AT1G10155	1	2.5	8.5	1	2.5	0	4.5	2	1	0	0	0	0	0	1	0	3	0	2	0.5	2	0	0	4.5	0	2.5	3	2.5
AT1G10170	144	185	123.5	164	153	156	162.5	106	177	163	117.5	191.5	101.5	152	160.5	90	83.5	102	118.5	164	123.5	115	182.5	184.5	61	110	97	108
AT1G10180	56.5	63.5	87	92	98.5	65.5	111.5	90	94	94	45.5	119.5	89	98.5	89.5	120.5	92.5	96	86	88	87.5	96.5	153.5	126.5	65.5	95.5	88	61
AT1G10200	215	166.5	149.5	135	143	138	162.5	163	168.5	133.5	126	133	188	198	197	194.5	219.5	198	198	183	189	183.5	209	190	137.5	168.5	135	172.5
AT1G10210	55	31	34	26.5	18	37	34	36.5	22.5	34	25.5	76	22.5	25	27.5	30	25.5	40.5	27.5	35	31	27	15	35	22.5	15	39.5	64
AT1G10220	5	2.5	13.5	2.5	2.5	6	1.5	2	4.5	0	3	10	6	4.5	7	7	4.5	2.5	2	4.5	6	1.5	0	0	27	1	0	0
AT1G10230	16.5	22.5	11	10.5	16	13.5	15	19	21.5	0	15	6	26	23.5	16	16	14	25.5	12.5	14.5	13.5	12	15	7.5	18	12.5	5.5	2.5
AT1G10240	30	49.5	24.5	21.5	31.5	24.5	33.5	44.5	25.5	10	20	6	35	25.5	24.5	33	25.5	30	27	35	23.5	27	0	17	13.5	20	32	27
AT1G10270	61	33.5	38.5	33	40	52	36.5	31	46	101.5	40.5	21.5	60	74	65.5	84	68.5	60	58	47.5	41	38.5	26.5	23.5	65.5	45.5	62.5	30
AT1G10280	25.5	19.5	29	40.5	30	52	36	27	22.5	12.5	33.5	26	12.5	19.5	22.5	18	17	18.5	25.5	36.5	18	26	0	15	32	16.5	26	11.5
AT1G10290	358.5	368	470.5	416	378.5	411.5	457	365	406.5	280.5	435.5	319.5	271	415.5	399.5	297	317.5	339	351.5	385	420.5	396.5	255.5	399.5	479.5	375.5	403.5	326.5
AT1G10300	15	17	4.5	2.5	5.5	6	11.5	0	11.5	0	12.5	0	10.5	4.5	18	6	15	17	9.5	3.5	2	2	38	2.5	9.5	9	15.5	2.5
AT1G10310	48	17	40.5	22.5	22.5	23.5	50.5	36.5	42	26	25.5	47	45.5	30.5	28	29	23.5	36.5	26.5	30.5	32	30	15	17	27	26	34.5	33
AT1G10320	72.5	84	89.5	68.5	70.5	72.5	85.5	54.5	63.5	83.5	74	93	53	78	68.5	59.5	78	57.5	71.5	65.5	70	60	88	49	41.5	61	82.5	111
AT1G10330	9.5	4.5	4.5	2	4.5	2	1.5	9	0	0	0	10	3.5	2	4	3.5	3	3.5	5.5	2	3.5	3.5	0	6	13.5	3.5	5.5	0
AT1G10340	6.5	6	11	0	2.5	0	2.5	3.5	1	0	7	10	3.5	0	3	6	3	3.5	5	4.5	0	5.5	0	2.5	0	3.5	5.5	17
AT1G10350	46.5	31	36.5	50	45	59	38.5	40.5	53	37	69.5	42.5	46	43.5	45	48	67.5	41.5	47.5	44.5	49	41.5	15	69.5	107	69.5	26	61
AT1G10360	78	79	56.5	65.5	51.5	113	78	94	84.5	68.5	74	146	76	87.5	50	89.5	78	72.5	68.5	70.5	64.5	82.5	141	109.5	41.5	77.5	76.5	88
AT1G10370	146	149.5	196	135	137.5	141	185.5	96	129.5	112.5	153	89	179	183.5	131.5	153.5	162	129.5	165.5	179	189	168.5	182.5	173	219.5	105	114	136.5
AT1G10380	168.5	108	196	67.5	78	114.5	151	148.5	137	80	104	76	137	151.5	97	147	145	110	136	127	162	118.5	182.5	97	137.5	151	91	140.5
AT1G10390	403	268	321.5	295	307.5	335	335	289.5	340	428.5	273	319.5	269.5	364.5	394.5	321.5	325.5	291	322.5	337	352	282	283	378.5	313.5	319	271	347.5
AT1G10400	8	2.5	4.5	0	1	1	0	0	0	0	3	0	1	1	3.5	5.5	0	2.5	1	2	1	0	0	0	0	3.5	0	4.5
AT1G10410	313.5	297	263.5	237.5	232.5	262.5	265.5	304	242.5	287.5	265.5	382	290.5	249.5	231	295	264	232.5	275.5	290.5	300	292	283	275	308.5	265	206.5	288
AT1G10417	21	0	4.5	8	7	6	10.5	5	10.5	12.5	15	10	9.5	3.5	10.5	9.5	3	8	3.5	6	6	3	38	4.5	9.5	8	10.5	35
AT1G10430	101	119.5	74.5	106.5	96	108	100	87.5	114	101.5	88	54.5	133.5	107.5	85	111	123.5	91	100.5	90	96	105.5	0	95	51	71.5	71.5	94.5
AT1G10450	136	197	92	128.5	126	123.5	102.5	140.5	123.5	116	88	229.5	94	129.5	134	86	101.5	131.5	130.5	153	129.5	141.5	182.5	152	164	153	120.5	181.5
AT1G10460	12.5	13	11	9	10.5	16	10	14.5	9	26	20	38.5	11.5	14	9.5	10.5	12.5	10.5	8.5	7	8	13.5	15	2.5	13.5	10.5	10.5	22.5
AT1G10470	703	535.5	601.5	320	346	337	390	394	481.5	558.5	500	378.5	493.5	401	367.5	502.5	423.5	529.5	493.5	368	361.5	418	444	400.5	212.5	484.5	530.5	438.5
AT1G10480	52	124	79.5	80.5	80	62.5	60.5	90	49	90	51	84.5	36.5	21	37	24.5	25.5	28.5	33	49	48.5	67.5	15	74	32	38	73.5	51
AT1G10490	120.5	114.5	77	106	115.5	105.5	76.5	71.5	89.5	58	96	80	84.5	93	111	88	103.5	114.5	103.5	116.5	125.5	103.5	114	99	96.5	131	129.5	80
AT1G10500	32	63.5	56.5	34.5	45.5	29	25.5	42.5	47.5	30	48.5	26	34.5	17	33	43.5	36.5	36	33	33	33.5	57	38	41.5	27.5	29	32	27
AT1G10510	68.5	54	59	68.5	68.5	43.5	72.5	69.5	75	37	90.5	50.5	60	57	69.5	71.5	74	66.5	70.5	65.5	73.5	73	63	67.5	37	66.5	68.5	78
AT1G10520	22.5	17	13.5	21	10	24.5	33	16.5	3	0	7	13.5	17	16.5	16	9	18.5	20	23.5	8	23.5	13.5	38	9.5	9.5	6.5	0	22.5
AT1G10522	15	24.5	11	12.5	12.5	14.5	13	10.5	10.5	0	12.5	30	14.5	8.5	9.5	12.5	6	19	8	16	16.5	12.5	0	4.5	5.5	6.5	5.5	35
AT1G10530	3.5	15	8.5	7.5	3.5	18.5	4	14.5	5.5	0	12.5	13.5	6	0	5	3.5	7	8.5	4	3.5	9	6	0	7.5	37	2.5	7.5	14.5
AT1G10550	9.5	6	2.5	1	2.5	4.5	3.5	9	3	12.5	17	10	10.5	8.5	5	7	10.5	2.5	5	10.5	2.5	6	26.5	7.5	0	6.5	12.5	11.5
AT1G10560	21	4.5	27	25	30	21.5	21.5	40.5	22.5	16	17	34.5	9	18	13.5	11.5	25.5	14.5	10	22.5	18	25.5	0	23.5	13.5	22.5	5.5	14.5
AT1G10570	91.5	74.5	104	96	116.5	91	85	76	106	76	61.5	71.5	60	59	71.5	74.5	74	84.5	74	81.5	107	119.5	38	133.5	107	110	56	75
AT1G10580	115.5	82	72.5	131.5	120.5	92.5	103.5	94	98.5	167	112	93	119.5	138	125.5	100.5	92.5	98	100	108	101.5	114.5	76	107	96.5	121.5	88	137
AT1G10590	228.5	209	217	287	266.5	290.5	257.5	289.5	257.5	163	229.5	239	324	239	253	251	295	301	255	240.5	253	287	255.5	255.5	320.5	282	226	239
AT1G10600	19.5	52	22.5	27	36.5	33	36.5	44.5	36.5	76	28	42.5	30	25.5	33.5	35.5	12.5	30	48	35	33	38	153.5	27.5	32	48.5	18	35
AT1G10610	8	13	27	19.5	21.5	17	14.5	21	26.5	26	17	47	15.5	12.5	19	27	25.5	15.5	20	17.5	18.5	17	0	39	41.5	8	48	9.5
AT1G10630	262	257	245	304	284.5	344	370.5	264.5	282.5	264	298	243	366	285.5	294.5	350.5	288.5	411.5	347	292.5	296	251	256	285.5	291	291.5	255	267
AT1G10640	55	35.5	63.5	89.5	134.5	111	59	96	121.5	109	79.5	38.5	96.5	103.5	82	74	94	87.5	71.5	112	150	129.5	76	49	61	55	37	80
AT1G10650	71.5	98.5	87	55.5	67.5	74.5	62.5	108	67.5	19.5	59	58.5	82.5	55.5	67.5	59.5	78	63.5	78.5	63.5	60	63.5	38	33.5	81	51.5	71.5	61.5
AT1G10660	70.5	124	82	77.5	85.5	65.5	68.5	81.5	88	83.5	66.5	80	56	78	85	75	70.5	88	87	86	92.5	75	15	55	153.5	63.5	91	122.5
AT1G10670	752.5	609	749.5	822	774.5	821.5	805	693	819.5	901.5	790.5	855.5	754	682.5	780.5	842	754.5	807.5	805	759	752.5	762	1015	836.5	1061	777	937	791.5
AT1G10680	2.5	0	4.5	5.5	10	4.5	8	2	5.5	0	5	0	1.5	4.5	7	1.5	1	1	5	3.5	7	9.5	0	15	0	5	0	4.5
AT1G10682	521	539.5	619.5	481.5	434	559	590	596.5	517	514	425	483	675	646.5	628	666	903.5	681.5	706.5	533.5	613	624.5	377.5	649.5	705.5	546.5	668.5	579.5
AT1G10690	12.5	19.5	29	10.5	15	8	18.5	10.5	18	10	20	0	12.5	12.5	12.5	19	25.5	15	16	12.5	10	17	0	21.5	13.5	21.5	32	17
AT1G10700	59.5	103.5	89.5	81	64.5	69.5	85.5	54.5	121.5	68.5	66.5	76	70.5	82.5	96	65.5	96	94	79	71	56	83	153.5	115.5	117.5	81	76.5	70.5
AT1G10720	87	52	129.5	65.5	77	70.5	63.5	73.5	77	90.5	90.5	47	72.5	69.5	69	78	74	97	87	82.5	71.5	87	63	53	37	94	99.5	131.5
AT1G10730	30	38	40.5	37.5	36.5	26.5	44	31	20	0	22.5	0	36.5	38.5	41.5	24.5	30	34.5	40.5	32	32	35.5	15	27.5	37	33.5	42.5	35
AT1G10740	119	67.5	89.5	107.5	130	147.5	111.5	102	129.5	101.5	126	26	67.5	93	74	77	65.5	73.5	69.5	86.5	78	143.5	0	74	133	106.5	105.5	70.5
AT1G10750	12.5	6	13.5	23.5	10.5	14.5	22.5	21	22.5	16	12.5	21.5	14.5	13.5	28	24.5	27	15.5	15	21.5	25	30	0	6	5.5	15	34.5	7
AT1G10760	191.5	191.5	190.5	340	323	373	268	262.5	289	251	189.5	123.5	154	233.5	187	146	158.5	182.5	206.5	378	380	397	168.5	230	331	210	157	191.5
AT1G10780	8	10.5	27	21.5	25.5	32	16	12.5	9	7	9.5	6	22.5	14	19	17	17	21	19	10.5	18.5	19.5	0	0	22.5	18	7.5	7
AT1G10790	6.5	4.5	13.5	11.5	11.5	7	5	2	6.5	16	9.5	10	4.5	3	12.5	12.5	7	9.5	5.5	5	9.5	2	0	21.5	9.5	13.5	0	7
AT1G10800	0	2.5	6	3.5	1.5	1	4	2	3	0	17	6	3.5	3	1	7	1	2.5	1	3.5	4.5	4.5	0	2.5	5.5	1	7.5	0
AT1G10810	12.5	6	4.5	11.5	4.5	7	19.5	24.5	4.5	61.5	17	6	9.5	11	17	12.5	10.5	25.5	15	14.5	21.5	8	0	11.5	32	12.5	15.5	9.5
AT1G10820	81	79	82	63.5	52	68.5	56	61.5	57.5	65.5	45.5	54.5	43.5	55.5	54	61.5	55	75	84.5	61	67.5	55	50.5	78.5	56	71.5	88	40.5
AT1G10830	18	13.5	17	23.5	23.5	28	25	22.5	24	37	20	54.5	28.5	17	24.5	25.5	17	15	22.5	28.5	24.5	17	0	29	22.5	24.5	42.5	48.5
AT1G10840	375.5	294.5	362.5	366	359	370	328.5	346.5	350.5	429	329.5	329.5	396	374	372	399.5	373	416.5	384	425.5	396	350.5	295	308.5	345	363.5	287	318.5
AT1G10850	79.5	77	82	83	76	52	84.5	76	67.5	65.5	109	106.5	107.5	90.5	98	88.5	74	79	78	83	70.5	61	63	71.5	81	90	88	103
AT1G10865	19.5	44.5	17.5	38	34.5	43.5	26.5	16.5	36.5	65.5	38	21.5	59	40.5	32	32	27	49.5	33	32	36.5	37	15	33.5	13.5	22.5	29	33
AT1G10870	102.5	147	152	115	130	111	116.5	114	95.5	98.5	112	106.5	78.5	105	98.5	106	101.5	135	123.5	101	116.5	119.5	101	91	143	134	91	134
AT1G10890	163.5	191.5	208	211.5	153	224	135	176	174	296	143.5	196	184.5	176.5	175.5	168.5	188	186	219.5	183	162.5	193.5	128	200.5	212.5	196	214	310.5
AT1G10900	185	211	123.5	194.5	186.5	189.5	177	180.5	191.5	122.5	166.5	187	155	183.5	179	178	152	145	153	192	163.5	182	63	173	168.5	175.5	135	200.5
AT1G10910	39	38	54.5	35	34	55	44	44.5	47.5	87	40.5	50.5	26	46.5	28	36.5	43.5	56	48.5	51.5	50.5	46.5	38	51	27.5	50	53.5	61.5
AT1G10920	10.5	2.5	4.5	3.5	3.5	13.5	8	31	12.5	19.5	9.5	21.5	8	4.5	4	8.5	7	5.5	10	11.5	8	11.5	0	4.5	9.5	6.5	3	2.5
AT1G10930	33	13.5	36.5	30	34.5	47.5	51.5	29	49	43.5	22.5	54.5	18.5	55	49.5	27	35	41.5	37.5	45.5	44.5	38.5	50.5	67.5	65.5	27.5	42.5	30
AT1G10940	235.5	230	318.5	200.5	205	275	238.5	210.5	194	257	234.5	263	263	234	246	256	261.5	266.5	259	256	237.5	209	182.5	178	308.5	269.5	180.5	231
AT1G10950	455.5	439.5	452.5	471.5	471.5	484	433	438	455	461.5	542.5	329.5	369	432	443	459.5	452.5	471.5	476.5	467	486	488.5	338.5	408	331	523.5	430	449.5
AT1G10960	79.5	98.5	126	68.5	62.5	50.5	84.5	61.5	85.5	72.5	99	97.5	140.5	111	72	107	67.5	72.5	62	96	80	69.5	196	39	85.5	51.5	53.5	30
AT1G10970	22.5	10.5	20	49	38.5	41.5	29	24.5	22.5	47	31	34.5	43.5	57	45.5	24.5	12.5	20.5	23.5	34.5	33.5	22.5	15	25.5	22.5	24.5	45.5	9.5
AT1G10990	15	8.5	6.5	9.5	5	9.5	13	0	9	10	17	26	12.5	19.5	8	13.5	7	16.5	15	10.5	16	3	0	17	13.5	12.5	7.5	14.5
AT1G11000	30	56	43	94	72	67.5	74.5	73.5	35	94	77	80	49	59	72.5	55	53.5	61.5	62.5	55	59.5	45.5	38	55	37	45.5	42.5	38
AT1G11020	46.5	49.5	34	40.5	51.5	41.5	33	61.5	42	54	66.5	34.5	49	43.5	49	57.5	46.5	46	41.5	51.5	43.5	47	88	43.5	51	39.5	21	24.5
AT1G11060	79.5	91	65.5	61.5	64	43.5	59	52.5	43	30	45.5	102	57	69.5	57	61.5	58.5	58	62	70.5	47	46.5	50.5	59	37	61	53.5	53.5
AT1G11070	3.5	0	2.5	2	7	9.5	9	0	12.5	26	0	0	6	9.5	4.5	3.5	14	5.5	6.5	9	6	12	0	13.5	5.5	5	3	7
AT1G11080	188	164	273.5	132.5	96	116.5	169.5	115.5	196	186	153	196	221.5	291	304	298.5	297	303.5	260	124.5	131	105.5	269.5	219.5	237.5	284.5	349.5	184
AT1G11100	46.5	38	49.5	25.5	29	23.5	40	31	33	19.5	33.5	66.5	24.5	32	35	21	25.5	24.5	31	34	21.5	15.5	26.5	37	51	27.5	59.5	45.5
AT1G11120	2.5	6	13.5	9.5	12.5	18.5	14	21	5.5	16	0	0	12.5	15	15	6	6	8	8	8	11.5	11.5	0	15	0	8	5.5	17
AT1G11125	0	0	0	5.5	6	3.5	5.5	3.5	4.5	0	0	6	9	3.5	4	6	1	1	6	8	8	2	0	0	5.5	0	5.5	0
AT1G11130	97.5	116.5	152	129.5	132.5	142.5	116.5	115.5	155	83.5	132	119.5	89	116.5	101.5	108.5	121.5	119.5	145	101	156	130.5	88.5	122.5	113	111.5	105.5	91
AT1G11160	25.5	17	54.5	19	23.5	10.5	13	19	20	26	7	13.5	32	30.5	37.5	35	23.5	25.5	21.5	23.5	26.5	14	88.5	27.5	18	24.5	21	22.5
AT1G11170	33.5	19.5	24.5	34	45	44.5	21.5	24.5	32	40.5	40.5	6	19	30	24.5	26	35	24.5	34	43.5	41.5	57	0	27.5	32	40.5	15.5	48.5
AT1G11175	13.5	24.5	15.5	19.5	16	4.5	13	16.5	22.5	34	22.5	13.5	12.5	14.5	16	21	12.5	14	11	14	9	25.5	0	4.5	9.5	21.5	15.5	7
AT1G11180	9.5	13.5	11	9	5	4.5	9	14.5	9	0	0	0	9.5	9.5	5.5	6	1	5	11	9.5	2.5	6	0	15	0	20	10.5	7
AT1G11185	0	2.5	11	2	1.5	3.5	4	0	1	0	15	0	8	5.5	4	5	6	0	6.5	3.5	4.5	8	0	0	0	2.5	5.5	4.5
AT1G11190	30	17	11	34.5	46.5	36	24.5	46.5	30	0	51	54.5	68.5	39.5	46	27.5	34	16.5	20.5	42.5	35	38	0	41.5	5.5	38	18	24.5
AT1G11200	34.5	22.5	45.5	37	38	47.5	30	29	40.5	16	38	47	39	47.5	35.5	50.5	38.5	36	40.5	31	41.5	34.5	76	25.5	18	40.5	29	64
AT1G11210	1	0	2.5	1	4.5	3.5	10	10.5	5.5	10	9.5	13.5	5	5.5	2	0	1	2.5	3.5	5	1	3.5	0	2.5	0	6.5	0	7
AT1G11220	6.5	17	6.5	10	5.5	4.5	7	5	4.5	7	5	6	5	7	3	6	4.5	6	9	6	7	3	0	0	0	3.5	10.5	4.5
AT1G11240	74.5	77	87	92.5	96.5	82	101.5	73.5	94	65.5	54	179	129.5	83.5	97	111	96	121.5	96	96	96	105.5	15	82.5	46	87	105.5	85.5
AT1G11260	209	169.5	138.5	115.5	112	107	162.5	136	117.5	90.5	117.5	123.5	116.5	136.5	160.5	159	123.5	141.5	127	146	126.5	144	128	248	193.5	156	178	166.5
AT1G11270	8	6	8.5	10.5	12.5	18.5	12.5	10.5	20	19.5	28	17.5	7	11.5	15	18	15	16.5	16	7	20.5	13.5	15	13.5	9.5	20	21	14.5
AT1G11280	85.5	91	102	90	73	64	72	100	84.5	90.5	122.5	42.5	78	76.5	69.5	82	78	102.5	106	85.5	83.5	97.5	114	109.5	85.5	103.5	79	100.5
AT1G11290	1	0	4.5	3.5	2	2	5.5	0	0	0	0	21.5	3.5	7	6	1	0	4.5	3.5	4.5	1	4.5	0	7.5	0	1	3	0
AT1G11300	16.5	29	8.5	8	8	6	5	5	9	30	0	10	6	4.5	5.5	5	6	5.5	11.5	10.5	10.5	9.5	0	2.5	9.5	24.5	3	4.5
AT1G11310	247.5	237.5	167.5	196	158	154	157.5	234	181.5	211.5	164	400.5	253	201.5	231.5	259	194.5	205.5	223.5	180	190	157	196	180	174	192	183.5	259
AT1G11320	10.5	26.5	17.5	7.5	6	6	10.5	7	10.5	10	5	26	15.5	7	7	9.5	7	8.5	12.5	9	16	11.5	88.5	7.5	9.5	5	3	9.5
AT1G11330	84	193.5	129.5	137	175	161	105.5	168.5	110	101.5	122.5	42.5	74	60.5	68.5	65.5	58.5	64.5	67.5	105.5	101.5	141	76	150	91	103.5	88	95
AT1G11350	3.5	19.5	22.5	10.5	10	17	12.5	3.5	5.5	19.5	5	30	7	11.5	5.5	8	7	7	14	7	5.5	17	15	6	5.5	8	10.5	19.5
AT1G11360	94	98.5	77	73.5	88	52	127.5	90	83.5	37	64	84.5	92	79	81	75	62	66.5	87	71	79	90.5	26.5	78.5	41.5	66.5	116.5	75
AT1G11380	49	63.5	59	37.5	37	61.5	46	50.5	26.5	26	51	146	34	42.5	41.5	44.5	32	49.5	45	37	27	59.5	38	47	27.5	38	39.5	24.5
AT1G11390	43.5	79	43	62	53	69.5	61.5	22.5	53	40.5	54	30	67	62	60.5	57	83.5	64.5	68.5	54.5	50.5	65.5	88.5	71.5	85.5	85.5	48	33
AT1G11400	98.5	74.5	90	93	81.5	86	117.5	77.5	67.5	101.5	69.5	119.5	94	101	72	81	81.5	81	89	73	80	99	50.5	103	65.5	79	73.5	67.5
AT1G11410	39.5	54	22.5	20.5	17	18.5	10.5	21	21.5	30	22.5	6	17	11.5	17	19.5	22	21.5	19	17.5	16	16	38	9.5	9.5	6.5	23.5	17
AT1G11420	8	10.5	11	32	36	43.5	29	12.5	25.5	10	38	21.5	22.5	12.5	26	29	27	22.5	30	29	42.5	32	63	27.5	32	31	12.5	9.5
AT1G11430	36	49.5	43	34	43.5	52	59	34.5	34	23	69.5	26	73	49	56	62.5	74	79	45	56	52.5	46.5	15	51	32	35	37	43
AT1G11440	24.5	17	27	17	15.5	12.5	10.5	14.5	24	7	5	30	26.5	25	24.5	34	35	20.5	33	25.5	15	28.5	0	19.5	27.5	22.5	23.5	38
AT1G11450	55	42.5	61.5	56	53	65.5	22.5	60	49	43.5	66.5	17.5	50.5	53.5	39.5	57.5	38.5	46	46	36	51	46.5	26.5	53	37	42.5	39.5	67.5
AT1G11460	6.5	15	0	6	1	6	3.5	2	11.5	19.5	15	10	6	2	3.5	3.5	6	5	2.5	2	3.5	2	26.5	0	13.5	1	5.5	0
AT1G11475	42.5	69.5	29	60.5	43.5	62.5	47	40.5	42	30	66.5	13.5	82.5	51.5	61.5	74.5	76	83	56	53	44.5	76	63	43.5	51	56	29	80
AT1G11480	221.5	248.5	250.5	320.5	305	320	323.5	294	310	406.5	288.5	369	296.5	275.5	275.5	284	298.5	277	263.5	325	290.5	284.5	377.5	294	296.5	267.5	274	290.5
AT1G11490	2.5	2.5	0	3.5	2	1	0	0	2	0	0	0	4.5	3	1	2	7	3.5	2	0	10.5	3.5	0	4.5	9.5	3.5	0	0
AT1G11500	1	0	2.5	2.5	2	2	0	9	2	10	0	0	2.5	5.5	3.5	3.5	7	5	1	1.5	0	3.5	0	0	5.5	0	0	4.5
AT1G11530	12.5	17	2.5	1	8	3.5	4	7	1	0	0	6	7	3.5	5	10.5	10.5	6	3.5	6	7	10.5	0	2.5	5.5	3.5	5.5	7
AT1G11540	5	6	11	4.5	1.5	1	5	3.5	5.5	0	7	13.5	6	6	6	14	10.5	5	6.5	5	10	7.5	15	7.5	5.5	6.5	23.5	9.5
AT1G11545	153	115	235.5	153	132.5	129.5	203	176	198	159	161.5	128.5	221.5	229	185	191.5	236.5	223.5	200.5	177	199	184.5	114	146	189	185	159.5	225.5
AT1G11570	5	13.5	0	1	6	7	7	0	3	0	3	0	4.5	3	3	6	7	5	5	7	4.5	1.5	0	4.5	9.5	5	0	0
AT1G11580	1347	1369	1392	770	794	777.5	1015	1165	1071.5	1115	1177.5	1127.5	898.5	1071.5	958.5	1053	1066.5	997	1127.5	1050.5	1181.5	1140	1301.5	1312	1166.5	1181.5	1177.5	1366.5
AT1G11592	15	26.5	17.5	19.5	17.5	23.5	28	19	26.5	10	31	0	28.5	26.5	29	34	15	22.5	29	24.5	31	9.5	0	15	27.5	22.5	15.5	14.5
AT1G11600	3.5	0	0	1	2	2	4	2	2	0	0	0	2.5	0	3.5	7	1	4.5	4.5	3.5	5.5	2	0	2.5	13.5	2.5	3	0
AT1G11630	29	17	27	18	21.5	18.5	14	22.5	12.5	0	17	0	10.5	18	14	14.5	7	15	15.5	14.5	21.5	20	0	15	13.5	21.5	5.5	0
AT1G11650	527	438	515	574	505.5	517	523.5	438.5	474.5	380.5	523.5	448	539.5	546.5	540.5	506	529	511.5	496	531.5	531.5	505.5	546.5	481.5	453.5	485	472	424.5
AT1G11660	147	162	182	150.5	176.5	123.5	178	146.5	163.5	179	181.5	165	147.5	172.5	173	145	166.5	150.5	138.5	162	147.5	187	141	180	255.5	198	200.5	197
AT1G11670	374	415	332.5	183.5	170.5	175.5	244	228.5	227.5	343.5	349.5	386.5	296.5	377	324	288.5	313	244.5	317	244.5	209	214.5	324.5	378.5	244	307	378.5	357.5
AT1G11680	365.5	484.5	455	456	472	436	451.5	431.5	447	480	448	592	368	378.5	432	399.5	434.5	433.5	452.5	443	388.5	462.5	256	445.5	345	488.5	629.5	425
AT1G11700	61	91	38.5	45.5	35	20	61.5	58	55	76	59	84.5	65.5	53.5	45.5	35.5	48.5	37	42	34	42.5	41.5	15	19.5	37	39.5	50.5	24.5
AT1G11710	12.5	0	2.5	12.5	6	12.5	9	3.5	12.5	7	31	0	4.5	4.5	10.5	6	15	9	7	10.5	7	9	15	13.5	0	10.5	15.5	2.5
AT1G11720	33.5	17	20	51	34	46.5	39.5	50.5	44.5	54	35.5	34.5	20	33	34	29	25.5	25.5	33	44.5	41.5	45	15	51	22.5	39.5	32	19.5
AT1G11730	3.5	4.5	4.5	6	4.5	14.5	1.5	14.5	5.5	0	7	6	7	11	5	7	1	5	9	6	9	7.5	0	4.5	0	5	5.5	0
AT1G11740	12.5	17	11	5.5	10	4.5	7	5	5.5	10	9.5	17.5	14	5.5	10.5	14.5	15	15	11	10.5	14.5	5.5	15	23.5	13.5	22.5	8	19.5
AT1G11750	55	84	56.5	69.5	64	83.5	90	46.5	66.5	68.5	54	38.5	79	63.5	71.5	65.5	78	84	77.5	61.5	83	49	38	69.5	76	84.5	108.5	40.5
AT1G11755	16.5	17	27	23.5	21.5	29	21.5	12.5	16.5	10	31	26	21.5	21	16	16	34	28	19	24.5	32	20	26.5	9.5	5.5	16.5	12.5	27
AT1G11760	22.5	13.5	32	18	17.5	12.5	26.5	29	26.5	19.5	35.5	26	27.5	21	23.5	26.5	18.5	23.5	30	19.5	20.5	15	15	37	32	13.5	15.5	7
AT1G11780	36	15	40.5	38	25.5	43.5	23.5	46.5	25.5	30	43.5	0	34.5	27	32.5	22.5	17	33	29	29	37.5	38	26.5	23.5	27.5	48.5	34.5	27
AT1G11790	94.5	67.5	149.5	119.5	110	136.5	81.5	79.5	94	83.5	158.5	128.5	87.5	106.5	85.5	70.5	63.5	94	89.5	106.5	106.5	75	15	53	76	94	100	97
AT1G11800	12.5	15	20	15.5	16	22.5	11.5	7	11.5	23	7	13.5	18	15	18	19	22	12.5	20	17	19	21	0	21.5	27.5	15	8	19.5
AT1G11820	68.5	49.5	54.5	46.5	62.5	82	51.5	90	91	83.5	51	35	64.5	63.5	72	56	78	72.5	81	73.5	93	78	88.5	80.5	27.5	71.5	71.5	51
AT1G11840	2294.5	2390.5	2548	3869	4209	4687.5	2780.5	3298.5	3380	3053	3018.5	3380	2813	2839	2711.5	2839	3124.5	2639.5	2639.5	3869	4209	4432	3088	3436.5	3765	2760	3018.5	2780.5
AT1G11860	565	558.5	535	451.5	467	426.5	590.5	438.5	494	352	550	400.5	476.5	498	439	552.5	560	474.5	517.5	512	557	587	444	490.5	439	579.5	544	352.5
AT1G11870	46.5	24.5	43	37.5	38.5	32	55	46.5	38	43.5	51	66.5	43.5	36.5	42.5	38.5	38.5	36	42.5	28	35	38	63	45.5	71	55	37	45.5
AT1G11880	10.5	2.5	17.5	19	27	30.5	13	9	25.5	19.5	9.5	21.5	9	21	19.5	15.5	6	13.5	13.5	15.5	18	21	0	35	18	13.5	15.5	33
AT1G11890	85.5	106	96.5	95	104.5	100.5	112.5	87.5	75	72.5	96	47	133.5	97	132.5	120.5	110	133.5	101.5	123.5	108.5	89	63	82.5	71	134	85	88
AT1G11905	61	79	38.5	58	59.5	43.5	66.5	48.5	39.5	47	45.5	80	36	34	44.5	42.5	74	54	51	50	38	67.5	88.5	59	46	53	39.5	17
AT1G11910	2839	2970	2684	2488	2515.5	2016	2367	2760	2367	3088	2606.5	2515.5	2227	2407	2417.5	2197.5	2403.5	2132.5	2407	2403.5	2390.5	2390.5	2760	2639.5	2606.5	2488	2374	2417.5
AT1G11915	8	2.5	0	2.5	0	4.5	0	0	9	0	0	0	6	4.5	6	5.5	7	7	8	9.5	8	4.5	0	23.5	32	1	23.5	2.5
AT1G11930	123.5	108	94	77	75	113	89	71.5	75	54	82.5	150.5	112.5	107.5	105	84	126	92	89	82	69.5	135	101	103	107	116.5	106	103
AT1G11940	39.5	10.5	22.5	34.5	30	26.5	25	19	28	23	22.5	21.5	20	21.5	16	15	27	24.5	19	17	16	23.5	101	37	32	16.5	23.5	35
AT1G11950	32	22.5	4.5	21.5	18	17	16	27	14	0	33.5	26	11.5	13.5	23.5	7	19	17.5	19	23.5	26.5	27.5	0	21.5	27.5	31	10.5	7
AT1G11960	39.5	52	29	49.5	44.5	29	44.5	48.5	44.5	23	40.5	30	39.5	48.5	50	49	40	42.5	45	35	35	40.5	89	80.5	56	32	79	51
AT1G12000	683	584	673	775	771.5	739.5	794	754.5	814.5	522.5	585.5	783	705.5	758.5	754.5	760.5	868.5	805	709	685	744.5	703	392.5	824.5	741	796.5	660.5	775
AT1G12010	133.5	177.5	99	39.5	49.5	37	99	65.5	63.5	98.5	77	71.5	73.5	73	82	94	87	91	101.5	82.5	93	79	50.5	95	189	135	123.5	144
AT1G12020	30	22.5	29	27	10	8	24.5	14.5	15	16	17.5	17.5	24.5	21.5	33.5	14.5	23.5	23.5	22.5	14.5	20.5	15	26.5	17	13.5	9	15.5	14.5
AT1G12040	68.5	26.5	32	8	12	9.5	16	21	22.5	43.5	40.5	13.5	40.5	43.5	50.5	54	30	22.5	33	19	12.5	15.5	26.5	21.5	13.5	24.5	18	30
AT1G12050	137.5	149.5	138.5	141.5	166.5	161	146.5	128.5	145	122.5	88	115	162.5	160	178	167.5	158.5	153	136	174	168.5	158.5	141	89	56	131.5	100	80.5
AT1G12060	3.5	2.5	13.5	11.5	15.5	7	18	10.5	11.5	26	12.5	0	21	11.5	11.5	8.5	14	8	10.5	9	15	12	0	7.5	9.5	20	3	9.5
AT1G12080	365.5	455.5	486	230	233.5	232.5	439	258	304	303.5	413	455.5	385	323.5	292	411.5	350.5	315	394.5	285	269.5	359	196	320	373	444	392	339.5
AT1G12090	188	197	188	187	169.5	175.5	205	176	226	264.5	198	169.5	198	177.5	206.5	185.5	227	215.5	212	287.5	245	192.5	128.5	205.5	277	188	267.5	288
AT1G12110	1287.5	1583	909	603.5	638	354.5	520.5	871	531	878.5	1078	1261.5	1314.5	1210.5	1498	963	719	537	809.5	505.5	338.5	436	870	725	509.5	896.5	765.5	903.5
AT1G12120	161	186.5	175	158.5	158	174	173	121.5	185.5	116	138	102	184.5	184.5	155.5	202	197	190	177	202.5	175	192.5	114	239	198	161	141.5	162
AT1G12130	10.5	13.5	6.5	7	5.5	8	21.5	38.5	11.5	0	3	35	3.5	2	3.5	9.5	0	9	13.5	6	12.5	7	15	25.5	18	13.5	5.5	4.5
AT1G12140	217.5	189	225	128.5	180	138.5	142	165	181.5	119.5	155.5	191.5	217	185.5	202.5	228.5	201	152	160	172	169.5	152	153.5	137.5	81	180	153	200.5
AT1G12160	72.5	60.5	104.5	83	64.5	70.5	86.5	96	63.5	116	122.5	84.5	65	76.5	66.5	65.5	53.5	64.5	80	79.5	60	85.5	76	63	37	69.5	65.5	67.5
AT1G12200	164	240.5	170	153	145	154	128.5	156.5	184.5	68.5	189.5	110.5	131.5	131.5	121.5	138	103.5	111	118.5	133.5	148.5	126	209	133.5	168.5	147	210.5	119.5
AT1G12220	19.5	19.5	8.5	18	17.5	24.5	22.5	19	20	30	7	10	17.5	16.5	20.5	7	15	16	17	22.5	17	28.5	15	15	37	13.5	15.5	11.5
AT1G12230	319	265.5	336.5	357.5	324.5	296.5	324	272	317	246	285.5	243	273.5	320	324.5	315	380.5	330.5	323.5	329.5	398	282	506	320.5	225.5	271	303	308.5
AT1G12240	561	672.5	515.5	469	406	393	506.5	579.5	465	362.5	429	558.5	411	449.5	424	488.5	454	404	415.5	480	453.5	472.5	309.5	385	412.5	519.5	511.5	411.5
AT1G12244	6.5	13.5	4.5	7.5	8.5	1	10	27	2	0	7	0	8	6	10	6	9	10.5	7	11.5	9	5.5	0	2.5	13.5	18	26	2.5
AT1G12250	22.5	8.5	11	16	21.5	7	14	14.5	20	26	7	0	16.5	11.5	8	19.5	17	14	14	16	12.5	13.5	63	4.5	13.5	21.5	5.5	27
AT1G12260	19.5	22.5	17.5	19	15	43.5	20.5	24.5	20	34	33.5	21.5	16	11.5	15	14	17	9	12.5	19.5	16.5	21.5	38	29	22.5	18	18	24.5
AT1G12270	154	126	170	165.5	156	139.5	210.5	145	178	119.5	168.5	128.5	159	179	168.5	158	179.5	205.5	178	176.5	184.5	150.5	89	187.5	168.5	174.5	214	153.5
AT1G12280	27	15	6.5	12.5	16	8	19.5	21	34	7	20	17.5	13.5	11.5	12.5	19	27	25	22.5	19	20	27.5	0	19.5	27.5	31	5.5	33
AT1G12290	33.5	52	22.5	19.5	15	18.5	15	21	14	68.5	20	47	19.5	28	15	16	7	22	21	16	12.5	26	38	13.5	32	22.5	26	17
AT1G12300	12.5	6	11	17	5	7	20.5	24.5	5.5	16	17.5	10	9.5	10.5	9.5	11.5	9	8	9	10	7	9.5	0	21.5	0	18	5.5	11.5
AT1G12320	5	10.5	22.5	13.5	7	10.5	14	9	10.5	47.5	9.5	6	12.5	7	7	8.5	6	5.5	2.5	16	22.5	14	0	7.5	27.5	12.5	3	4.5
AT1G12330	5	4.5	6.5	6	3.5	0	7	2	5.5	0	5	0	6	3.5	5.5	3.5	3	6.5	2	4.5	7	2.5	26.5	15	9.5	1	3	2.5
AT1G12350	67.5	42.5	49.5	57	56	65.5	44	69.5	44.5	43.5	85	30	61	59.5	61	59.5	68.5	72	73	59.5	67.5	45	38	101.5	27.5	59.5	53.5	83
AT1G12360	344	383	271.5	305.5	327	276	271	301	281.5	303.5	251	267	221	287	270.5	264.5	279.5	236.5	299.5	323.5	294.5	292	338.5	317	327.5	261	296.5	231
AT1G12370	74.5	56	59	70.5	62.5	76.5	63.5	65.5	64.5	68.5	74	93	52	72	45.5	43.5	43.5	50.5	51	55	41.5	69.5	76	55	51	64.5	53.5	45.5
AT1G12380	56.5	77	49.5	76	71.5	61.5	50.5	52.5	57.5	101.5	40.5	54.5	60.5	61	72.5	52.5	74	64.5	79	67.5	69.5	68.5	38	53	81	69.5	50.5	106
AT1G12390	54	31	59	84	67.5	60	32	63.5	50	23	33.5	26	63.5	73	71.5	72.5	53.5	70.5	70.5	69.5	75	64.5	89	63	51	51.5	53.5	43
AT1G12400	30	10.5	27	29	18	34.5	11.5	12.5	25.5	10	12.5	30	22.5	13.5	19	15.5	12.5	19	16	25.5	13.5	29	0	23.5	18	12.5	29	30
AT1G12410	85.5	89	102	122.5	98	111	134.5	163	101	101.5	99	54.5	126	104.5	108	91	130.5	102	116.5	104.5	109	126	63	101.5	71	101.5	126	73
AT1G12420	79.5	94	87	85.5	92	100.5	76.5	73.5	85.5	116	104.5	42.5	38.5	52.5	47	35	53.5	52	60	50.5	58.5	73	15	57	71	42.5	73.5	80.5
AT1G12430	72.5	91	106.5	58.5	58.5	53	72	50.5	79.5	76	64	106.5	58	59.5	62.5	49.5	58.5	47.5	72.5	52	67.5	76.5	63	31	65.5	76	91	91
AT1G12440	147.5	63.5	170	86.5	116.5	113	111	119.5	115	83.5	126	160.5	112.5	119.5	108	125	146.5	150.5	116.5	104.5	98.5	111	168.5	145	102	137.5	131.5	164.5
AT1G12450	27	15	27	27	34.5	26.5	16	22.5	21.5	40.5	31	35	15	10.5	15.5	22.5	27	23.5	17.5	32	16	26	76	35	5.5	26	12.5	35
AT1G12460	16.5	8.5	8.5	32.5	15.5	12.5	22.5	21	18	43.5	28	6	14.5	16	15	15	29	15.5	26	18	13.5	19.5	38	6	13.5	18	37	30
AT1G12470	125	157.5	96.5	150.5	149	127	134.5	121.5	151.5	151.5	112	111	112.5	145	137.5	126	130.5	139.5	120.5	147.5	160.5	147.5	240.5	131.5	107	167.5	138	146
AT1G12500	82.5	98.5	115.5	44.5	55	53	64.5	56	67.5	30	79.5	150.5	86.5	62.5	78	97	70.5	97	89	68.5	63.5	63.5	76	43.5	113	53	79.5	70.5
AT1G12520	103	137	102	77	62.5	49	96	77.5	53	58	101.5	128.5	85.5	68.5	78	97	83.5	93	89.5	64.5	91	76	63	91	143.5	116.5	103	97.5
AT1G12530	36	54	27	30	47	39.5	59.5	48.5	42	30	20	26	64.5	43.5	41.5	62.5	63.5	39.5	51.5	47	33.5	45.5	38	33.5	18	40.5	29	27
AT1G12550	10.5	6	0	9	7	9.5	21.5	10.5	14	0	7	0	12.5	10.5	5.5	12.5	10.5	7	13.5	9	14.5	8	15	15	9.5	2.5	12.5	9.5
AT1G12560	48	26.5	65.5	21.5	30	12.5	16	52.5	25.5	19.5	61.5	66.5	85.5	60.5	60.5	59.5	22	26	33	24.5	27	10.5	15	15.5	18	24.5	3	35
AT1G12580	122.5	82	120.5	136	146	158	144.5	138	153	98.5	138	207.5	122.5	129.5	134.5	137	134.5	89	126	131	99.5	133.5	38	178	61	131.5	111	88
AT1G12600	5	0	6.5	1	4.5	2	0	0	2	0	3	6	5	3.5	5	5	0	4.5	5.5	1.5	3.5	1	0	2.5	0	2.5	3	0
AT1G12620	9.5	26.5	17.5	6	8	7	10	5	10.5	30	9.5	17.5	12.5	12.5	13.5	19	6	11.5	8.5	15.5	19	9.5	0	4.5	13.5	9	12.5	9.5
AT1G12630	2.5	0	0	2.5	4.5	1	2.5	2	4.5	7	0	0	1	2	2	1.5	0	0	1	3.5	4.5	1	0	0	0	1	0	0
AT1G12640	194.5	149.5	155	145	178	95	165	168.5	184.5	54	135	133	147.5	179	161.5	149.5	182.5	144	137	156	147	153	128.5	163	153.5	174.5	145	166.5
AT1G12650	67.5	77	45.5	74.5	72.5	52	57	76	60.5	72.5	61.5	58.5	65.5	83	64.5	62.5	87	69.5	69.5	75	72.5	80	15	71.5	81	90	79.5	83
AT1G12680	50.5	74.5	47.5	53	64.5	61.5	80	73.5	55	112.5	85	76	61.5	73	63.5	82.5	65.5	67.5	81	74.5	58.5	78	76	69.5	41.5	89	50.5	56
AT1G12700	5	2.5	8.5	6	2	17	7	2	9	7	7	13.5	10.5	6	5.5	6	4.5	15	15.5	10.5	7	9	0	4.5	5.5	3.5	12.5	19.5
AT1G12710	21	24.5	24.5	15.5	14	12.5	15	22.5	11.5	40.5	20.5	17.5	20.5	22.5	24.5	12.5	10.5	19	19	26.5	21.5	15	63	13.5	32	12.5	12.5	30
AT1G12730	8	35.5	8.5	12.5	12	14.5	9	12.5	5.5	26	3	17.5	13.5	8.5	10.5	13.5	20.5	11.5	13.5	14.5	14.5	18	15	21.5	9.5	12.5	29	17
AT1G12740	65.5	69.5	84.5	27	38	20	42.5	48.5	54	65.5	38	42.5	30	34	32.5	37.5	15	36	45	50	38.5	47	26.5	57	71	89	48	73
AT1G12750	84	94	99	58.5	68.5	68.5	70.5	106	83.5	76	61.5	76	97	79.5	79.5	106	96	121.5	121	68.5	72	62.5	26.5	55	65.5	67.5	62.5	83
AT1G12760	239.5	226	241.5	163	153	149	207	276	186.5	122.5	146	229.5	258	210.5	234.5	232.5	207	221.5	213.5	196	205.5	179	225	129.5	208	188.5	178	157
AT1G12770	27	19.5	32	37	27.5	37	46	36.5	30	40.5	54	35	28.5	40.5	37	34	38.5	26.5	26	32	41.5	35.5	15	35	41.5	35	48	43.5
AT1G12775	3.5	13.5	13.5	8	6	4.5	5	3.5	3	7	7	0	7	3.5	1	2.5	12.5	5	9.5	1.5	7	3.5	0	7.5	5.5	5	0	0
AT1G12780	127	103.5	87	158.5	123.5	128.5	154	145	171.5	130.5	175	187	124.5	103.5	114	136	126	95.5	115.5	170	170.5	147.5	168.5	190	148.5	111.5	129.5	80.5
AT1G12790	6.5	4.5	2.5	12.5	7	2	5.5	9	10.5	16	5	0	5	1	7	3.5	3	6.5	7	5.5	7	2.5	15	4.5	9.5	15	8	17
AT1G12800	81	44.5	45.5	74.5	81.5	78	61	54.5	83.5	10	85	54.5	39.5	58	57	48	68.5	58.5	39.5	73.5	89.5	87	15	43.5	65.5	63.5	50.5	48.5
AT1G12810	42.5	38	32	37	42.5	33	51.5	42.5	25.5	34	20.5	35	50.5	55.5	49.5	39	30	39.5	40.5	30.5	23.5	38.5	15	21.5	9.5	39.5	10.5	17
AT1G12820	55	72	59	62	52	74.5	76.5	85.5	62.5	133.5	64	42.5	48	76	90	62.5	96	65.5	65.5	64.5	81	68.5	50.5	51	81	71.5	85	88
AT1G12840	356	462.5	432.5	438	438	386	355.5	402	400.5	413.5	442.5	400.5	343.5	382	390	389	417.5	370.5	410	438	394.5	496	357.5	419	337	471.5	434	364.5
AT1G12845	1	4.5	0	2	1	1	0	2	1	0	0	0	3.5	2	2	0	0	5.5	2	5.5	3.5	3	0	4.5	5.5	5	8	2.5
AT1G12850	117	116.5	90	102	103.5	117	133.5	98	111	141.5	135	146	162.5	125	123.5	138	157	159	137	116.5	127.5	112	38	125	102	125.5	120.5	125.5
AT1G12860	2.5	0	2.5	1	2.5	3.5	5	12.5	2	30	5	0	1	2	4	6	4.5	5	2.5	3.5	2.5	3	0	6	0	10.5	5.5	4.5
AT1G12880	10.5	4.5	6.5	15.5	19	14.5	11.5	9	6.5	0	0	21.5	13.5	13.5	10.5	8	25.5	11.5	9.5	12.5	18	15.5	0	11.5	9.5	13.5	5.5	9.5
AT1G12900	34.5	42.5	32	10.5	29	22.5	17	34.5	32	30	20.5	58.5	18.5	11	12.5	23.5	25.5	13.5	16	24.5	56	42.5	38	39	61	24.5	39.5	24.5
AT1G12910	56.5	101	104.5	92	70	61.5	67.5	92	72.5	83.5	45.5	54.5	60.5	78	67.5	63.5	60.5	86.5	63.5	64.5	76.5	79	38	83	61	42.5	91	56
AT1G12920	244	180	243	257	271	285.5	259.5	223.5	275.5	230	267.5	254	265.5	265	229	225.5	243.5	267.5	277	284	260	317.5	411	282	225.5	263.5	255	214.5
AT1G12930	81	72	68.5	95	82.5	104	71.5	109.5	67.5	123.5	79.5	26	46.5	87	82.5	68.5	76	83	77.5	85	86.5	68	63	69.5	91	95.5	85	106
AT1G12950	62.5	58.5	43	55.5	37	24.5	32	42.5	47.5	23	22.5	47	64	81	68.5	52.5	53.5	29	55	25.5	24.5	19.5	38	37	37	35	23.5	33
AT1G12970	42.5	31	43	40.5	40.5	49	48	40.5	51.5	37	45.5	58.5	58	43.5	56.5	49.5	43.5	53.5	31	56	38	35.5	0	27.5	37	62	42.5	38
AT1G12990	27	31	34	34.5	34	46.5	33	24.5	30	10	22.5	6	28.5	33	34.5	33	46.5	42.5	38.5	33	31	32	26.5	15.5	37	45.5	23.5	24.5
AT1G13000	62.5	65	94	66.5	71.5	52	59	56	46	12.5	64.5	142.5	47.5	56	73.5	67.5	79.5	68.5	67.5	76	85.5	49.5	50.5	99	71	55	147.5	131.5
AT1G13020	150	116.5	152	132	110.5	91	201.5	100	119	72.5	187	38.5	107	111.5	123.5	146	155	132.5	124	111	112	130	76	95	96.5	115	85	91.5
AT1G13030	22.5	19.5	47.5	27	32	46.5	49	29	30	26	33.5	18	16.5	30.5	34.5	26.5	43.5	43.5	36.5	30	35	22.5	15	23.5	76	38	26	35
AT1G13040	15	10.5	13.5	23.5	23.5	16	6	9	16.5	7	12.5	13.5	3.5	11	10.5	3.5	20.5	13.5	9.5	7	10.5	9	0	25.5	27.5	20	18	27
AT1G13050	21	10.5	4.5	17	18	25	22.5	16.5	24	7	7	13.5	27	19.5	28	16	36.5	18	18	15	18	7.5	101	29	0	16.5	23.5	7
AT1G13060	327	386.5	339.5	366.5	363.5	379.5	396.5	387.5	337	403	392.5	259.5	450	382	391	402	350.5	389	387	436	392	378	209.5	366.5	320.5	351.5	505.5	253
AT1G13080	48	63.5	36.5	39	59.5	55	36	50.5	43	12.5	43.5	13.5	62.5	42.5	54	45	46.5	38.5	38.5	67	52.5	68.5	114	37	46	48.5	15.5	56
AT1G13090	48	67.5	29	81	76	78	55	79.5	79.5	30	59	50.5	73	65.5	60.5	63.5	89	60	70.5	92.5	92.5	119.5	89	31	65.5	69.5	42.5	38
AT1G13100	27	29	13.5	19	16	18.5	25.5	12.5	20	30	28	26	24.5	21	26.5	30	19	27	24.5	20.5	14.5	21	26.5	19.5	9.5	16.5	0	22.5
AT1G13110	82.5	137	70.5	26.5	27.5	20	35	61.5	29	90.5	64.5	30	80.5	59	85.5	93	65.5	56	82	53	38.5	45	89	27.5	13.5	92	62.5	106
AT1G13120	61	31	61.5	83	62.5	61.5	59	40.5	61.5	47.5	51	66.5	59	55	75	76	85	83.5	84.5	75	86.5	72	38	69.5	127.5	69.5	88	45.5
AT1G13130	8	8.5	11	15.5	28	10.5	13	22.5	16.5	30	17.5	13.5	9.5	18	3.5	3.5	3	2.5	1	11.5	20	15	0	27.5	27.5	16.5	3	0
AT1G13140	3.5	17	8.5	3.5	0	4.5	7	3.5	1	16	3	0	6	3	1	2.5	12.5	7	4.5	8	9	3	0	7.5	5.5	9	10.5	12
AT1G13150	5	6	13.5	8	1	0	3.5	2	3	0	9.5	26	0	2	1	4.5	3	4.5	5	2.5	5.5	4.5	0	6	0	5	0	22.5
AT1G13160	106	103.5	87	101.5	98.5	99.5	114	115.5	112	112.5	122.5	97.5	78	120.5	118.5	87	126	105.5	102	133.5	115	121	50.5	126.5	212.5	111.5	114	144
AT1G13170	104.5	140	164.5	133.5	115	135	115.5	158.5	116.5	133.5	120.5	115	91	103.5	107	111	99.5	106.5	120.5	127	119.5	105.5	89	133.5	117.5	118	129.5	128.5
AT1G13180	52	8.5	49.5	40.5	42.5	60	43.5	63.5	38	72.5	38	47	31	38.5	49	35	45	40.5	44.5	51	51	35.5	50.5	39	22.5	62	37	45.5
AT1G13190	61	98.5	61.5	90	81.5	113	104	79.5	91	130.5	88	89	74	79	104	71.5	83.5	74	75	84.5	96	68.5	15	115.5	71	82.5	91	85.5
AT1G13195	33.5	47	38.5	42.5	43.5	28	18.5	31	42	51	51	42.5	43.5	32	35.5	26	27	25	34	33	27	29	101	45.5	41.5	33.5	39.5	24.5
AT1G13210	120.5	142.5	177	107.5	91.5	74.5	102.5	81.5	101	109	112	169.5	73	115.5	105	94	112.5	122.5	125	112	124.5	97.5	114	131.5	189	101.5	129.5	140.5
AT1G13220	67.5	67.5	52	72.5	69.5	72.5	56	65.5	87	40.5	56	102	52	70.5	61.5	57.5	57	63.5	76.5	77.5	72.5	96.5	63.5	61	107	82.5	85	67.5
AT1G13245	3.5	22.5	24.5	12.5	10	4.5	5.5	2	4.5	0	9.5	18	11.5	4.5	13.5	11.5	20.5	7	13.5	5.5	10.5	7.5	38	13.5	0	20	15.5	12
AT1G13250	55	63.5	61.5	44.5	37	52	59.5	32	34	65.5	64.5	42.5	57.5	36	41.5	49.5	48.5	37.5	49.5	45.5	48.5	42.5	26.5	29	27.5	35	62.5	35
AT1G13260	21	19.5	15.5	11.5	10.5	32	16	19	9	23.5	17.5	10	7	7	7	10.5	9	22	5	10.5	4.5	12.5	0	7.5	18	21.5	21	7
AT1G13270	8	13.5	8.5	16	15.5	10.5	12.5	14.5	10.5	10	9.5	0	11.5	11	10.5	8.5	10.5	9.5	9.5	15	9.5	11.5	0	2.5	22.5	10.5	3	5
AT1G13280	179	108	131.5	173	177	205	175.5	184.5	209	209	229.5	179	205	176	175	183.5	155	169.5	161	196	196	180.5	182.5	239.5	244	153	197	172.5
AT1G13300	322.5	205	196	116.5	119	104	183	174	157.5	242.5	189.5	191.5	228.5	205	209	209.5	146.5	146	181	150.5	110.5	141	114	114	143.5	267.5	145	159
AT1G13310	3.5	0	8.5	0	0	0	0	7	2	0	0	0	2	0	0	1.5	1.5	0	2.5	1.5	1	2.5	0	2.5	5.5	1	5.5	2.5
AT1G13320	191.5	211.5	253.5	214.5	197	232.5	172.5	201.5	231	119.5	241.5	196	166.5	181	194.5	211.5	219.5	212.5	199	232.5	223	212	338.5	170.5	179.5	197	289.5	244
AT1G13330	1	2.5	0	3.5	1	1	3.5	9	6.5	12.5	15	18	3.5	6	3	3.5	3	2.5	1	5.5	7	7	0	9.5	0	1	0	2.5
AT1G13340	27	19.5	15.5	18	14	12.5	15	22.5	28	7	9.5	30	3.5	23.5	17	10.5	4.5	9.5	17.5	20	23.5	20	15	15.5	0	26	15.5	17
AT1G13350	87	74.5	99	85.5	83	72.5	78	92	87	72.5	126	80	64	66.5	93.5	92.5	63.5	103.5	113	84.5	85.5	88	26.5	122.5	133	115	79.5	106
AT1G13360	283	259	326.5	279.5	271	238	312.5	326.5	275.5	246	341.5	294	402	362.5	305.5	317.5	317.5	250.5	284	327	284	313	225	308.5	193.5	307.5	316	347.5
AT1G13370	0	0	0	1	3.5	4.5	3.5	3.5	1	0	7	0	1	2	0	0	0	0	0	4.5	2.5	1.5	0	0	37	5	5.5	0
AT1G13380	59.5	49.5	52	58	61.5	65.5	53	48.5	56	37	61.5	21.5	59	57	51	63.5	41.5	63.5	53.5	58	57	62.5	50.5	61	32	61	42.5	64
AT1G13390	82.5	96	61.5	51	45.5	48	72.5	42.5	57.5	109	51	62.5	68.5	76	63.5	59.5	76	61.5	61	55	62.5	56	63.5	103	46.5	71.5	65.5	56
AT1G13410	5	10.5	8.5	7	5.5	4.5	4	5	9	10	0	0	4.5	0	2.5	2	7	7	4.5	2	1	3.5	0	2.5	5.5	5	0	5
AT1G13420	299.5	271	259.5	152.5	152	127	108	186.5	211.5	310.5	196	400.5	317	327.5	290.5	408	373.5	234	354	86	116.5	106	240.5	203	208	246	210.5	308.5
AT1G13430	12.5	15	8.5	8	8	9.5	14	5	6.5	0	3	0	4.5	8.5	4	8	10.5	4.5	8	11.5	10	9	0	21.5	5.5	5	3	5
AT1G13440	4549.5	4382	4432	4382	3765	3880	4077.5	4209	4104.5	4978.5	4687.5	4432	5341	5453.5	6590	4978.5	4880	5453.5	5244.5	4104.5	4104.5	3880	4841	4549.5	4841	4549.5	5341	4687.5
AT1G13450	50.5	98.5	63.5	80.5	94.5	67.5	69.5	83.5	87	61.5	56	80	85.5	92	92.5	86	92.5	78	91.5	91.5	78	80	26.5	78.5	61	100	73.5	54
AT1G13460	48	35.5	96.5	45	50.5	61.5	42.5	46.5	47.5	61.5	88	169.5	44.5	55.5	55.5	46.5	55	62	62.5	51	55	52	38	78.5	65.5	77.5	53.5	33
AT1G13480	1	6	13.5	1	6	4.5	7	10.5	1	7	7	6	3.5	5.5	3	8.5	19	3.5	3.5	6	2.5	3	15	0	5.5	3.5	10.5	2.5
AT1G13500	6.5	19.5	4.5	6	16	3.5	8	7	8	10	7	26	14.5	5.5	15	5	1.5	9	8	7	8	1.5	0.5	7.5	0	2.5	15.5	5
AT1G13510	25.5	31	17.5	8	20.5	9.5	26.5	24.5	14	30	17.5	30	22.5	15	19	14	9	16	16.5	7	7	15	15	17	0	15	48	2.5
AT1G13520	36	63.5	27	18	38	10.5	19.5	19	28	30	43.5	18	33	26.5	31	26.5	20.5	18.5	32	39.5	16.5	39.5	15	35	5.5	38	10.5	48.5
AT1G13530	24.5	19.5	6.5	12.5	9.5	9.5	12.5	14.5	6.5	0	17.5	6	15	5.5	8	10.5	9	4.5	15	13.5	13.5	14	0.5	25.5	0	12.5	39.5	24.5
AT1G13540	1	6	2.5	1	0	0	0	2	1	10	5	6	0	0	2	0	1.5	0	3.5	1	0	1	0.5	2.5	5.5	2.5	5.5	12
AT1G13560	196	157.5	265.5	189.5	182	220.5	190.5	168.5	178	112.5	150.5	151	197	180	185.5	224	221.5	249.5	237.5	205	203.5	180	240.5	168.5	189	177	138	164.5
AT1G13570	49	47	77	60	46.5	59	46	54.5	51.5	54.5	33.5	66.5	34.5	42.5	43	56	58.5	54	53	65.5	53.5	60.5	38	57	22.5	51.5	62.5	14.5
AT1G13580	55	65.5	56.5	46.5	61.5	43.5	31	65.5	38	47.5	25.5	42.5	40.5	31	39	37	65.5	56	46.5	45.5	41	48	168.5	63	27.5	56	65.5	61.5
AT1G13590	16.5	10.5	20	13.5	12.5	6	8	12.5	10.5	0	12.5	13.5	15	3.5	14	10.5	14	14	13.5	18	10.5	16	26.5	33.5	9.5	22.5	23.5	9.5
AT1G13600	12.5	10.5	11	20.5	11.5	20	21.5	14.5	25.5	30	12.5	10	24.5	15	26	23.5	23.5	21.5	15.5	34	31.5	27	15	6	37	9	29	40.5
AT1G13610	12.5	13.5	8.5	16	7	7	15	7	11.5	23.5	12.5	30	14	9.5	12.5	12.5	14	15	8	18	16	16	0.5	4.5	5.5	6.5	5.5	2.5
AT1G13620	1	10.5	0	4.5	4.5	6	4	9	1	0	0	0	3.5	1	2	5	0	2	2.5	1	2.5	6	0.5	6	0	8	10.5	5
AT1G13630	1	4.5	6.5	5.5	4.5	6	5	21	4.5	0	10	6	4.5	6	4	9	7	7	9	3.5	5	9.5	0.5	6	18	5	10.5	14.5
AT1G13635	30	40.5	15.5	20.5	25.5	25	14.5	36.5	29	26	33.5	50.5	26.5	16.5	22.5	24.5	14	16.5	21.5	18	13.5	34	0.5	33.5	22.5	21.5	15.5	24.5
AT1G13640	67.5	108	92	89	90	96.5	101.5	69.5	91	101.5	104.5	42.5	73	84.5	80.5	92.5	65.5	74	95	103	89	123.5	38	57	51	67.5	68.5	75.5
AT1G13670	43.5	42.5	68.5	27	17	28	64.5	32.5	34	54.5	59	26	55	52.5	39	65.5	62	33	41.5	44.5	33.5	54	26.5	71.5	32	46.5	45.5	43.5
AT1G13690	18	33.5	38.5	29	23.5	25	32	36.5	20	16	36	10	25.5	33	29	25.5	34	35	27.5	22.5	28	21	50.5	13.5	9.5	13.5	56	24.5
AT1G13700	16.5	31	8.5	42.5	41.5	34.5	43.5	19	36.5	0	15	0	20	28	18	26	10.5	22.5	21.5	43.5	27	46.5	15	25.5	27.5	27.5	23.5	27
AT1G13710	27	24.5	40.5	1	1	3.5	14.5	7	5.5	12.5	12.5	35	13.5	18	7	23.5	34	21	19	0.5	9.5	3	0.5	11.5	32	24.5	39.5	19.5
AT1G13730	136	137	109	147.5	138.5	146	137	152	156	201.5	135	115	174	136.5	153.5	143	143	194.5	150.5	152	161.5	131.5	89	131.5	189	163	123.5	197
AT1G13740	25.5	22.5	27	22.5	23.5	28	18	21	14	7	40.5	62.5	11.5	16	14.5	11.5	17	17.5	12.5	13.5	10.5	28.5	15	17	9.5	16.5	29	17
AT1G13750	36	8.5	27	38	29	23.5	27.5	42.5	33	34	38	6	37	41.5	36	43.5	30	36	41.5	25.5	28.5	30	0.5	31	37	26	76.5	30
AT1G13770	44.5	22.5	43.5	42.5	44.5	42.5	40	27	54	68.5	15	80.5	22.5	29	29	29	38.5	30	42	32	46	34.5	63.5	43.5	51	48.5	68.5	40.5
AT1G13780	5	19.5	13.5	15	17.5	13.5	18	12.5	15.5	0	17.5	0	8	8.5	14.5	19.5	14	15	11.5	14	10	14	15	17	9.5	8	15.5	22.5
AT1G13800	2.5	2.5	4.5	5	2.5	2	1.5	3.5	2	12.5	10	6	3.5	2	3.5	4.5	6	4.5	5	1.5	2	1.5	0.5	17	5.5	3.5	0	2.5
AT1G13810	10.5	6	2.5	19	8.5	6	11.5	5	12.5	30	5	10	10.5	9.5	12.5	12.5	12.5	10.5	10.5	12.5	9	16	15	6	9.5	10.5	3	12
AT1G13820	21	10.5	38.5	17.5	17	13.5	18	21	15.5	12.5	15	30	15.5	13.5	21	19	20.5	15.5	16.5	18	25	20	15	9.5	18	10.5	12.5	19.5
AT1G13830	68.5	86.5	43.5	39.5	50	30.5	46	40.5	60.5	94	56	62.5	103	65.5	70	83	32	56	60.5	62	42.5	38	38	76	27.5	42.5	68.5	56
AT1G13860	61	49.5	68.5	67.5	70.5	131	49.5	71.5	83.5	94	66.5	93	62	57	63.5	56	89	70.5	82.5	72.5	64.5	84	63.5	55	51.5	72.5	106	88.5
AT1G13870	22.5	31	34	36	27	29	37.5	16.5	42	19.5	33.5	26	39.5	20	35	33	20.5	44.5	44	40.5	34	36	76	55	27.5	24.5	48	40.5
AT1G13880	90	65.5	61.5	59	62.5	60	54	38.5	63.5	26	66.5	38.5	65	59.5	69	63.5	76	72.5	66.5	61	64.5	76	101	55	56	56	59.5	75.5
AT1G13900	82.5	103.5	143.5	85.5	91	84.5	95	96	75	123.5	56	115	105	89.5	106	99	94	64.5	84.5	90	83	89	76	74	71	134	85	116.5
AT1G13910	30	17	63.5	30	34	50.5	24.5	42.5	32	47.5	31	42.5	20	30	31	22.5	29	30	41.5	40.5	43.5	33	114	31.5	56	35	23.5	73
AT1G13920	43.5	38	43.5	32.5	21.5	20	41.5	31	28	16	33.5	35	51	38	30	45.5	35	33	32	34.5	33	37	26.5	17.5	102	39.5	15.5	19.5
AT1G13930	1486.5	1392	1588	1411.5	1411.5	1566.5	1613	1451	1498	1481.5	1322.5	1383	2052.5	1526	1255.5	1804.5	1665.5	1525	1481.5	1498	1566.5	1838.5	1383	1496.5	1252	1369	1347	1275.5
AT1G13940	32	82	38.5	46.5	34.5	48	36	27	40.5	34	36	21.5	37	55	40.5	41.5	36.5	40.5	51	45.5	71.5	38	76	31.5	41.5	50	68.5	17
AT1G13950	68.5	56	61.5	52.5	51.5	63	63.5	42.5	59	58	31	54.5	53.5	57	54	56	50	55	58.5	58	34.5	53	38	59	46.5	58	48	70.5
AT1G13960	91.5	130.5	104.5	109	105.5	113	78	108	87	94	112	76	90	105	114	96	67.5	70.5	95	106.5	92	77.5	225	89	61	110	141.5	78
AT1G13970	59.5	99	77	55.5	54.5	33	22.5	58	57.5	43.5	40.5	71.5	57	43.5	55	66.5	58.5	55.5	61	61	64.5	64.5	38	61	32	51.5	59.5	61.5
AT1G13980	131.5	185	162.5	169	151	171.5	158.5	199	157.5	141.5	112	165	120.5	150	157	156	155	157.5	171	151	149	153	128.5	216.5	122.5	170.5	147.5	131.5
AT1G13990	85.5	99	52	89	100.5	84.5	83	71.5	69	105.5	61.5	123.5	94	78	81	69.5	62	47.5	68.5	81	75	73	0.5	45.5	71	64.5	65.5	78
AT1G14000	177	224	182	187	155	146	172	226	175.5	209	257	191.5	192.5	210.5	194	203	196	202.5	194.5	187	194.5	152	225	248	164	203.5	180.5	187
AT1G14010	79.5	86.5	92	104.5	103	115.5	103.5	100	111	54.5	77	133	105.5	116.5	102	96	110.5	90	99.5	108	83.5	91	76	69.5	71	64.5	48	100.5
AT1G14020	48	26.5	70.5	60.5	66.5	96.5	60	85.5	84.5	54.5	74	21.5	54	59	58	59	89	69.5	73	77.5	67.5	58	50.5	53	96.5	53.5	48	67.5
AT1G14030	3.5	2.5	17.5	9	5	8	10.5	12.5	12.5	0	10	13.5	7	7	10	10.5	17	9	8	7	7	4.5	0.5	17.5	9.5	5	10.5	7
AT1G14040	67.5	84.5	90	99	86.5	89	56	87.5	87	80	74	71.5	24.5	71.5	50.5	48	89	59	54	80	96.5	114.5	26.5	111.5	27.5	72.5	56	114
AT1G14060	30	56	36.5	42.5	34.5	50.5	46	27	44.5	65.5	25.5	47	63.5	55.5	55.5	41.5	79.5	56	37	43.5	53.5	45.5	26.5	31.5	51.5	61	56	67.5
AT1G14080	64	69.5	54.5	53	42.5	23.5	53	60	57.5	61.5	51	35	43.5	46.5	50	58	25.5	47.5	58	55	47.5	46.5	63.5	43.5	51.5	36.5	45.5	70.5
AT1G14120	314	320.5	301.5	618.5	603.5	684	411.5	557	396	414	298	445	679	690	629.5	737.5	808	609	651.5	473.5	532.5	466	603.5	491.5	423.5	282	293	348
AT1G14130	71.5	77	54.5	89.5	89.5	94	68.5	63.5	88	109	59	71.5	158.5	117.5	117.5	135	94	94	97	71.5	71.5	54.5	89	45.5	32	72.5	94	103
AT1G14140	19.5	29	82	29	40	20	32	40.5	30	34	33.5	21.5	38	39.5	28	32	20.5	25	22.5	23.5	25	33	15	17.5	32	20	21	43.5
AT1G14160	82.5	42.5	61.5	12.5	7	4.5	23.5	38.5	29	10	31	18	44.5	38	33	39.5	34	39.5	59	30	16.5	21	0.5	43.5	18	39.5	32	17
AT1G14170	61.5	89	59	71.5	86.5	59	55	52.5	54	65.5	66.5	146	68.5	67.5	85	57	57	67.5	62	63.5	64.5	59.5	182.5	95	86	66.5	50.5	114
AT1G14180	13.5	13.5	8.5	16	16	25	14	14.5	20	19.5	33.5	0	19	21.5	19	11.5	12.5	14	22.5	14.5	16.5	20	26.5	7.5	18	27.5	32	7
AT1G14185	40.5	15	43.5	15	13.5	28	26	34.5	20	40.5	31	18	44.5	49	39.5	54	38.5	40.5	47.5	29.5	21.5	27.5	0.5	35	71	27.5	56	17
AT1G14190	15	8.5	11	17.5	21.5	17	25	21	22.5	12.5	3	0	14.5	21.5	23.5	30	22	19.5	20	23.5	18	24.5	26.5	4.5	22.5	16.5	0	12
AT1G14200	49	13.5	24.5	19.5	27	37	24.5	24.5	25.5	12.5	3	13.5	32	19.5	13.5	13	19	6	9.5	18	32	21	63.5	23.5	13.5	13.5	21	5
AT1G14210	88.5	101	99	86.5	102	98	122.5	77.5	114	90.5	109	97.5	90	85	79.5	131	91	116.5	112	105.5	104	84.5	128.5	76	164	82.5	97	111
AT1G14220	52	52	74.5	25	31	25	33.5	34.5	29	54.5	61.5	54.5	46.5	44.5	43.5	50.5	43.5	35	42.5	29	32	21	15	17.5	37	36.5	48	43.5
AT1G14230	114	128.5	121	125	133.5	142.5	120.5	102	133	76	93	229.5	115	139.5	107	116.5	173	144	141.5	135	163	145	196	161.5	213	82.5	145	95
AT1G14240	117.5	180	129.5	231.5	224	262.5	140.5	189	225	201.5	146	133	158	171.5	169.5	220.5	259	175	146	207.5	285.5	298	225	209	237.5	137.5	208.5	184
AT1G14260	16.5	8.5	6.5	6	8	2	6	7	6.5	16	12.5	0	3.5	5.5	8	7	7	7	12.5	5.5	5.5	4.5	0.5	7.5	13.5	5	8	9.5
AT1G14270	12.5	8.5	4.5	16	8.5	14.5	12.5	5	16.5	10	38	6	14	7	9	14	9	19	13.5	22.5	15	21	0.5	7.5	9.5	21.5	3	22.5
AT1G14280	12.5	13.5	2.5	3.5	6	0	5	3.5	6.5	7	5	10	9	5.5	9	8.5	7	6	12.5	8	7	6	15	9.5	0	6.5	13	30
AT1G14290	76.5	91	92	85.5	67.5	78	56	109.5	75	43.5	79.5	54.5	50.5	51	75	88	80	93	94	93.5	88	77.5	101	97	46.5	84.5	56	61.5
AT1G14300	27	26.5	56.5	47	44.5	64	41.5	32.5	54	26.5	38	66.5	27	55	45	32	43.5	54	50	40.5	51	48	1	49	71.5	46.5	37	43.5
AT1G14310	33.5	35.5	29	22.5	28	14.5	16	7	22.5	10	17.5	0	19	16	25.5	27	20.5	13.5	28	18	25	27	50.5	15.5	27.5	18	18	5
AT1G14320	1463.5	1287.5	1481.5	1673	1607	1804.5	1810.5	1525	1810.5	1332.5	1559.5	1442.5	1827.5	1588	1682	1702.5	1955.5	2267.5	1844	1613	1793	1627	1413.5	1723	1709.5	1665.5	1511.5	1481.5
AT1G14330	50.5	60.5	20	56	32	33	56	46.5	34	26.5	61.5	54.5	38.5	58	42.5	42.5	52	35	50	51.5	38	52	26.5	27.5	61	59.5	50.5	27
AT1G14340	125	113	96.5	99	100	63	98.5	106	77	37	104.5	76	108	83	114	111	101.5	103.5	93	58	79	63.5	26.5	57	107	64.5	53.5	85.5
AT1G14345	3.5	6	8.5	10.5	5	7	5	3.5	10.5	10	7	21.5	13.5	10.5	11.5	14.5	1.5	10.5	11.5	11.5	12.5	11.5	1	0	9.5	5	10.5	12
AT1G14350	42.5	54	40.5	43.5	37	25	49	27	36.5	65.5	22.5	47	34.5	38	43	29	45	42.5	43.5	50	55	54.5	50.5	55	22.5	53.5	32	40.5
AT1G14360	61.5	31	82	89	84.5	119.5	116.5	110	90	47.5	74	119.5	106	85	91	97.5	89	78	77	103	86.5	93.5	26.5	91	65.5	79	88	64
AT1G14370	30	26.5	24.5	30	34	13.5	19.5	24.5	19	7	25.5	21.5	62	39.5	49.5	35.5	35	24.5	29	33	16.5	28.5	63.5	21.5	18	22.5	32	33
AT1G14380	131.5	124	106.5	156	132.5	113	161.5	174	184.5	105.5	150.5	182.5	148.5	133.5	141.5	171.5	182.5	148.5	145	173	181	199.5	209.5	243	153.5	179	126	103
AT1G14390	24.5	17	24.5	18	12.5	20	27.5	19	19	12.5	33.5	13.5	12.5	20	21	14	29	10.5	21.5	19.5	20	21.5	1	35	13.5	15.5	21	17
AT1G14400	624.5	568	438	533.5	492	590	576	631	557.5	472	602.5	505.5	601.5	570	557.5	690	610	739.5	598.5	522	529.5	476.5	790	681.5	597.5	569.5	533.5	549
AT1G14410	24.5	6	32	23.5	30	43.5	22.5	16.5	21.5	10	33.5	18	25.5	29	21.5	31	22	26	28	27	24.5	27.5	15	29	37	21.5	18	24.5
AT1G14430	3.5	0	2.5	1	0	1	0	2	2	0	3	0	1.5	6	3	1	3	1	4.5	1	1	5.5	1	2.5	5.5	3.5	0	0
AT1G14450	15	8.5	24.5	4.5	10	9.5	6	12.5	8	34	10	38.5	9.5	3.5	7	6	3	18	10	7	8	7.5	63.5	11.5	32	6.5	23.5	7
AT1G14455	1	6	0	0	0	3.5	0	0	2	0	5	6	2.5	3.5	0	2.5	9	2.5	3.5	1.5	0	1	1	0	0	0	0	0
AT1G14460	40.5	40.5	68.5	61	56	72.5	46	52.5	70.5	12.5	54	76	36	47.5	50.5	42.5	43.5	38.5	50.5	53	46	56	63.5	87	46.5	69.5	39.5	85.5
AT1G14470	2.5	0	11	2	2	2	7	2	3	0	0	0	0	3	2.5	1	0	0	5	1.5	1	8	1	6	9.5	3.5	3	0
AT1G14480	3.5	19.5	4.5	8	11.5	10.5	9	5	8	0	7	0	10.5	3.5	6	7	6	12.5	8	3.5	12.5	7.5	1	4.5	5.5	6.5	26	5
AT1G14510	127	82	149.5	129.5	130	118.5	134.5	102	109	87	161.5	142.5	155.5	134	132.5	121.5	134.5	134	133.5	120.5	135	95	63.5	168.5	127.5	113	100	116.5
AT1G14520	22.5	24.5	6.5	61	62.5	50.5	17	29	26.5	26.5	15	47	17	17	17	27.5	32	16.5	20	49	35	50.5	1	15.5	0	12.5	0	12
AT1G14530	27	10.5	40.5	28	21.5	28	30	32.5	18	19.5	3	10	21.5	12.5	19	23.5	15	15.5	17	20.5	21.5	11.5	26.5	6	9.5	16.5	8	17
AT1G14540	18	47	22.5	42.5	26	21.5	9	19	12.5	47.5	20.5	21.5	23.5	15	47	23.5	1.5	17.5	23.5	27	17	25.5	15	27.5	5.5	15.5	15.5	24.5
AT1G14550	2.5	8.5	2.5	2.5	7	2	0	5	4.5	0	3	10	7	6	9.5	3.5	0	2.5	5.5	2.5	1	3	1	2.5	0	3.5	0	9.5
AT1G14560	81	67.5	82	64.5	57	43.5	51.5	50.5	75	61.5	51	71.5	55	71.5	63.5	57	47	65.5	63.5	61	54	68.5	50.5	87	56	79	76.5	76
AT1G14570	272	217.5	284.5	226	247	234	272.5	234.5	287	175	241.5	276	189.5	256	232	214.5	234.5	220.5	227.5	232	232.5	240	225.5	240.5	179.5	246	267.5	217.5
AT1G14580	22.5	10.5	17.5	9	17.5	8	19.5	9	9	40.5	22.5	38.5	12.5	15	15.5	25.5	20.5	9	18	16	16.5	12	15	11.5	13.5	27.5	29	33
AT1G14590	16.5	22.5	13.5	5.5	11.5	7	10.5	16.5	21.5	0	28	0	15	24.5	22.5	18	29	17.5	19	15	10.5	21.5	15	25.5	0	9	23.5	30
AT1G14600	6.5	0	2.5	1	2.5	6	3.5	5	1	7	12.5	0	5	3	4	9	6	12.5	8.5	3.5	6	2.5	1	2.5	9.5	8	0	7
AT1G14610	551	558.5	455.5	539	517	526.5	507.5	491.5	531.5	453.5	572	738.5	370.5	567	546.5	433	590	524.5	531	574	547.5	551	377.5	738.5	586	723	517	615.5
AT1G14620	104.5	99	96.5	102	139	144	109	94	101	34	132	138.5	158	115.5	127	136	119.5	189.5	98	119.5	154	92.5	153.5	111.5	117.5	163	131.5	76
AT1G14630	34.5	24.5	20	20.5	32	29	26	46.5	33	12.5	36	42.5	43.5	43.5	33	35.5	32	36	35	15	33	21.5	1	37	27.5	35	62.5	30
AT1G14640	24.5	40.5	24.5	20.5	17	21.5	21.5	14.5	28	30	12.5	13.5	9.5	21.5	22.5	13.5	29	26	31	26	25.5	25.5	26.5	6	32	20	37	14.5
AT1G14642	3.5	8.5	2.5	0	1.5	6	4	10.5	2	0	0	0	3.5	0	1	2.5	3	1	3.5	0.5	0	0	1	2.5	5.5	0	13	0
AT1G14650	268.5	248.5	260	245	243.5	206.5	249	253	228.5	175	224	267.5	214.5	260	234.5	229.5	209	240.5	234.5	234.5	265.5	214.5	114	251	231	175.5	210.5	228.5
AT1G14660	27	15	8.5	28	20	32	33.5	29	26.5	10	22.5	30	19	16.5	17	24.5	19	26	25.5	20.5	32	24.5	38	25.5	37	16.5	32	35
AT1G14670	484	490.5	629.5	624.5	539	602.5	473.5	527	587.5	531	413.5	471.5	345	487.5	499.5	585.5	432.5	478.5	484	636	663	493.5	517.5	538.5	685	504	590	544.5
AT1G14680	2.5	0	0	2	1.5	3.5	0	0	3	0	0	0	1.5	3	3.5	4.5	0	2	0	0.5	1.5	1	15	2.5	0	0	0	0
AT1G14685	61.5	63.5	79.5	100	80	84.5	71.5	81.5	87	159	91	54.5	90	81	74	90	78	100	82	78	87.5	93.5	101.5	51	71.5	59.5	114	43.5
AT1G14687	0	2.5	2.5	2	0	0	3.5	2	0	19.5	0	0	0	3.5	1	2.5	3	0	3.5	1	1	1	1	0	0	0	0	0
AT1G14690	120.5	108	145.5	116.5	115.5	127	114	96	119	54.5	96	146	104	104.5	125.5	107	118	112	108	120.5	122	152	141	74	113	127	123.5	116.5
AT1G14700	1	6	6.5	4.5	7	4.5	5	2	12.5	7	3	6	3.5	3.5	2.5	5.5	6	8	4.5	16	6	7.5	1	23.5	18	2.5	3	22.5
AT1G14710	206.5	230	256	259	231.5	288.5	259.5	214.5	224	257	189.5	165	267.5	244	221.5	261.5	240	281	253	235	284	228.5	101.5	312	314	319.5	284	300
AT1G14720	78	70	97	86.5	90	123.5	102.5	77.5	75	43.5	54	71.5	83.5	64.5	76	95.5	52	95.5	77	73	78	104	38	69.5	56	66.5	62.5	83
AT1G14730	250	203	235.5	192.5	254.5	276	281.5	251	268	267.5	224	179	293	261.5	240	320	292.5	252	269.5	228.5	241.5	211.5	209.5	269.5	219.5	262	163	246
AT1G14740	317	308.5	302	259	261	246	275	207	218.5	246	234.5	272.5	206.5	246	241.5	251	317.5	226	262	292	257.5	331.5	339	330.5	283	307.5	280	276
AT1G14750	3.5	2.5	17.5	4.5	11.5	12.5	5	10.5	9	10	7	0	7	9.5	6	5	7	7	5.5	7	7	5.5	1	4.5	5.5	8	13	2.5
AT1G14770	19.5	10.5	15.5	10	19	13.5	14.5	2	8	0	22.5	10	11.5	12.5	15.5	17	6	18	14	9	17	18	1	21.5	5.5	6.5	5.5	19.5
AT1G14780	40.5	22.5	52	23.5	12.5	18.5	21.5	36.5	19	54.5	38	38.5	53.5	43.5	52	33	32	28	28	22.5	24.5	24.5	76	7.5	13.5	26	32	35
AT1G14790	39.5	58.5	40.5	37.5	45	46.5	22.5	42.5	44.5	16	33.5	21.5	21.5	35	31	35	19	37	46	33	36.5	43.5	26.5	39	56	55	29	43.5
AT1G14810	179	175.5	167.5	120.5	128.5	145	167.5	161	161.5	94	147.5	97.5	182	169.5	183.5	176.5	158.5	187	137	147	145	116	63.5	101.5	107	151	203.5	122.5
AT1G14820	25.5	17	32	33	32	30.5	31	54.5	35	7	22.5	18	37	28	31	27.5	48.5	30	34.5	38.5	31	27.5	1	25.5	22.5	33.5	37	12
AT1G14830	442.5	420.5	426.5	399.5	409	400.5	414.5	399.5	436.5	395.5	361.5	378.5	346.5	441	418.5	417.5	455.5	415	399.5	433	434	431.5	309.5	348.5	331	437.5	452.5	442
AT1G14840	10.5	22.5	11	32	24.5	25	21.5	19	22.5	7	3	30	14	21.5	25.5	24.5	22	15	24.5	22.5	19	20	15	7.5	46.5	33.5	15.5	30
AT1G14850	142.5	169.5	118.5	168.5	151	174	199	142.5	130.5	119.5	187	93	107	154	146	128.5	178	137.5	147.5	142.5	162.5	157	89	127	213.5	159	97	157
AT1G14860	67.5	91	63.5	99	64.5	68.5	54	83.5	55	163	114.5	76	79	56	64.5	89.5	55	71.5	73.5	64.5	49.5	73	50.5	83	32	97.5	65.5	61.5
AT1G14870	481.5	683	334	271	327.5	193.5	271	365.5	265.5	498.5	471.5	488.5	689.5	453.5	533.5	465	343.5	320.5	400.5	289	199	231	428	335	255.5	382	284	504.5
AT1G14890	34.5	31	47.5	34.5	45.5	42.5	77	40.5	63.5	30	56	35	56	39.5	33	68.5	34	45.5	38.5	58	50.5	61	1	47	56	50	39.5	30
AT1G14900	162.5	209	134	129.5	138	131	180	140.5	157.5	147.5	164	169.5	194.5	199	160	163.5	170.5	190	159	127.5	132	96.5	256	133.5	174	141.5	245	122.5
AT1G14910	117.5	116.5	155	112	115	132.5	150	121.5	123.5	194	115	142.5	127	138	117.5	116.5	99.5	115	126	130.5	102.5	111.5	101.5	154	158.5	110	120.5	168.5
AT1G14920	54	54	43.5	45.5	32	48	54	71.5	40.5	7	33.5	42.5	40.5	50	44.5	43.5	52	52	46.5	26	36	37	15	25.5	37	51.5	50.5	43.5
AT1G14960	76.5	72	54.5	27	17	25	26.5	63.5	16.5	10	25.5	35	106.5	67.5	58	104	36.5	39.5	60	22.5	18	20	15	31.5	46.5	53.5	42.5	45.5
AT1G14970	15	26.5	40.5	52.5	44.5	60	29	50.5	44.5	19.5	36	30	24.5	40.5	30	37.5	34	53	35	34	39.5	40.5	1	27.5	41.5	53.5	45.5	54
AT1G14980	283.5	246	289	327	323.5	373	402	331	306.5	296	234.5	267.5	408.5	340	341.5	332.5	364.5	432.5	316	259	309.5	301	128.5	259	283	362.5	267.5	244
AT1G14990	25.5	24.5	11	46.5	26	28	42.5	24.5	33	0	20.5	30	36.5	34	35	50.5	58.5	39.5	37	40.5	39.5	38.5	26.5	37	13.5	18	32	40.5
AT1G15020	87	84.5	63.5	95	100.5	79	83	102	88	83.5	91	133	83.5	69.5	82	91	83.5	93	87	86	84.5	80.5	76	76	96.5	97.5	79.5	67.5
AT1G15030	62.5	31	65.5	62	61	49	85.5	67.5	57.5	68.5	64.5	18	36.5	38.5	39	48	52	50	37	41.5	67.5	61	76	55	61	79	42.5	45.5
AT1G15040	5	24.5	4.5	9.5	14	8	18	5	1	10	0	0	5	0	2	1	3	2.5	0	9	4.5	7	1	2.5	9.5	1	3	2.5
AT1G15060	71.5	63.5	99	76	72	78	74.5	62	78	61.5	91	54.5	62	98.5	77	77	92.5	84.5	80	87.5	100	69.5	26.5	89	76	81	76.5	54
AT1G15080	9.5	4.5	4.5	12.5	18	13.5	11.5	9	18	7	17.5	10	12.5	9.5	10.5	14	14	18	16	10.5	16.5	11.5	26.5	7.5	13.5	9.5	5.5	19.5
AT1G15100	268.5	217.5	233.5	189	164	159	226.5	263	169.5	267.5	211.5	207.5	276.5	160	161.5	154	137.5	135	140	163	144	192.5	240.5	156.5	102	185	103	168.5
AT1G15110	203	169.5	141	139.5	152	125.5	165.5	156.5	176	159	179	151	157	171.5	144	158.5	158.5	164	158	158.5	131	150.5	101.5	150	81	147	180.5	114
AT1G15120	456	429.5	438	397	404.5	431.5	230.5	422	426.5	494	558.5	436	454	332.5	396.5	468.5	529.5	525.5	434.5	357.5	367	376.5	462.5	484	542	466.5	650.5	624.5
AT1G15125	0	0	4.5	2.5	5.5	1	5	0	2	10	3	0	4.5	2	5.5	7	4.5	1	3.5	2	1	2.5	26.5	0	0	2.5	0	0
AT1G15130	339	450	363	345.5	328.5	335.5	328.5	331	360.5	414	302	300	290.5	357.5	322.5	313	292.5	279	287	318.5	318	320	378	275.5	193.5	275.5	259	316
AT1G15140	33.5	38	63.5	44.5	40	33	71.5	42.5	54	58	20.5	47	70	68.5	57	65.5	48.5	55.5	83	34	47	30	50.5	41.5	65.5	39.5	50.5	40.5
AT1G15160	5	0	22.5	13.5	11.5	18.5	13	9	11.5	23.5	7	13.5	18.5	11	10	12.5	10.5	18.5	10	19	16	10.5	15	11.5	0	6.5	5.5	7
AT1G15165	8	13.5	24.5	17	9.5	7	9	16.5	12.5	12.5	31	18	4.5	11.5	15.5	8	10.5	8	16	11.5	14.5	13.5	15	17.5	5.5	27.5	13	22.5
AT1G15170	33.5	15	47.5	19	21.5	16	21.5	34.5	29	13	38	42.5	28	23.5	26	23.5	14	25.5	20	34	30	25.5	15	6	0	26	21	35
AT1G15180	9.5	0	6.5	5	3.5	2	1.5	3.5	4.5	0	0	0	3.5	1	6	2.5	3	2	3.5	3.5	2	3	1	2.5	0	5	3	0
AT1G15190	2.5	15	2.5	3.5	2	1	5	0	0	0	15	6	4.5	5.5	2.5	2	1.5	4.5	1	3.5	9	7.5	26.5	4.5	9.5	0	5.5	0
AT1G15200	182	212.5	202.5	178.5	177	213.5	208	146.5	177	190.5	172	169.5	217.5	184.5	182.5	154	246	212.5	209.5	178.5	211.5	220.5	283	232	174	170.5	191.5	207.5
AT1G15210	814	843.5	821.5	510	523.5	490.5	607	737.5	728.5	741	856.5	808	438	630	611.5	635	666	587.5	708	730	718	711	682.5	819.5	654	943.5	983	764
AT1G15215	16.5	26.5	32	23.5	35	23.5	35	24.5	18	10	20.5	35	25.5	10.5	22.5	20	23.5	23.5	22.5	30	29	28.5	26.5	27.5	27.5	39.5	39.5	7
AT1G15220	9.5	10.5	13.5	16	10	17	28	24.5	24.5	40.5	17.5	21.5	13.5	16.5	11.5	21.5	19	12.5	18	15	10	10.5	1	6	22.5	13.5	15.5	9.5
AT1G15230	49	58.5	49.5	62.5	57	50.5	80	62	55	87	74	93	81	49	43.5	59.5	38.5	65.5	61	76	48.5	75	50.5	51	137.5	53.5	65.5	59
AT1G15240	165	177.5	165	165.5	166.5	198	157.5	148.5	181.5	222.5	172	169.5	116.5	154	157.5	163	176	162	162	180.5	192.5	190	153.5	180	213.5	182	191.5	192
AT1G15250	44.5	15	52	34.5	36	41.5	49	46.5	33	26.5	12.5	10	75	36	39.5	42.5	38.5	65.5	43.5	39.5	34.5	35.5	26.5	19.5	37	56	32	40.5
AT1G15260	1	2.5	8.5	5	2.5	6	6	3.5	2	0	10	6	4.5	2	5.5	4.5	7	4.5	2.5	2	2.5	3	1	0	9.5	0	0	2.5
AT1G15270	363	380	433	356	373	386	417.5	388	333	444	410	425.5	630	488.5	523.5	540.5	618.5	523.5	429	414	399.5	398	357.5	358.5	538	391	444	396.5
AT1G15280	276	220.5	228.5	182.5	205	232.5	225	184.5	200	175.5	257	212	185	214	230.5	185	214	238.5	203	207.5	210	210.5	89	192.5	168.5	239.5	271	211.5
AT1G15290	128.5	77	113	135	167.5	193.5	169.5	180.5	142.5	190.5	106.5	128.5	118.5	155	140	131	197	147	136	154	181	209.5	141.5	182	237.5	169	178.5	126
AT1G15310	24.5	35.5	17.5	50	42.5	43.5	40	34.5	34	34	15	30	41.5	30.5	39	39.5	38.5	34.5	40.5	40.5	48.5	35.5	15	39	27.5	35	21	12
AT1G15330	3.5	4.5	2.5	6	10.5	2	14	3.5	5.5	0	0	0	1.5	7	6	2.5	4.5	7	5.5	10.5	8	9.5	1	9.5	0	3.5	8	0
AT1G15340	294	248.5	272	260	298.5	357.5	374	258.5	272	198	294	386.5	329	319	317	263.5	410.5	284	292.5	295	273	334	196	348.5	302	293.5	280.5	288
AT1G15350	153	149.5	147.5	157	144	134	125	191.5	112	211.5	129.5	142.5	218.5	146	151.5	196	116.5	150.5	153	179	154	135	114	147.5	143.5	154	120.5	100.5
AT1G15370	123.5	74.5	124	111	131.5	100.5	134.5	98	121.5	65.5	69.5	97.5	137.5	124	104	162	121.5	154	125	120.5	114	98.5	15	107	153.5	90	79.5	137
AT1G15380	653	739.5	706.5	476.5	359.5	423.5	723	626.5	544	634	646.5	679.5	856.5	822	821.5	915.5	854	836.5	783	469.5	447	464.5	533.5	678.5	776	645.5	916.5	635
AT1G15385	2.5	0	0	1	2.5	0	5	0	1	0	3	10	4.5	3	0	0	1.5	0	5.5	0	2	3.5	15	6	0	3.5	13	9.5
AT1G15390	16.5	24.5	17.5	37.5	29.5	46.5	47	32.5	21.5	40.5	20.5	54.5	33.5	25	29	29	32	29	31	24.5	39.5	37	15	33.5	13.5	29	23.5	17
AT1G15400	175.5	157.5	138.5	135	150.5	123.5	169.5	150.5	119	76	129.5	160.5	255	160	173	217	173	150	150.5	138.5	144	116.5	225.5	142.5	96.5	142.5	126	144
AT1G15410	37.5	35.5	27	34.5	27	61.5	33.5	44.5	36.5	40.5	36	30	19	46.5	35.5	35.5	19	36	34.5	32	36	18	50.5	19.5	32	22.5	42.5	38
AT1G15420	87	99	72.5	85.5	76	96.5	85	83.5	74	54.5	71.5	38.5	104	100.5	102.5	108	103.5	124.5	115.5	80	102.5	69.5	128.5	71.5	107	106.5	53.5	97.5
AT1G15430	43.5	52	38.5	48	36.5	34.5	45.5	24.5	30	26.5	22.5	30	47.5	31	38.5	33	17	36.5	33	29	38	28.5	89	45.5	46.5	36.5	29	30
AT1G15440	90	116.5	143.5	108	117.5	115.5	126	81.5	95.5	182.5	115	38.5	130.5	137.5	112.5	112.5	143	148.5	152	104.5	116.5	84.5	63.5	119.5	137.5	97.5	141.5	128.5
AT1G15460	76.5	84.5	104.5	90	92	96.5	151	176	150	123.5	184.5	169.5	101	107.5	90	77	78	73.5	115	90	92	122.5	196.5	85	102	108	59.5	103
AT1G15470	70.5	60.5	104.5	73.5	78	91	101.5	83.5	83.5	119.5	48.5	26	85.5	72	93.5	84.5	78	77.5	70.5	82.5	62	72	63.5	59	61	77.5	53.5	88.5
AT1G15480	10.5	26.5	13.5	29	29.5	36	34.5	21	49	19.5	3	18	40.5	30.5	27.5	33	23.5	41.5	27	21.5	22	34	15	25.5	18	18	29	22.5
AT1G15490	71.5	44.5	77	59	45.5	64	76	60	74	94.5	59	71.5	55	51.5	65.5	60.5	58.5	62.5	65.5	55	54	53	114	47	56	63.5	42.5	43.5
AT1G15500	740	701.5	679.5	488.5	474	493	660.5	520.5	572	585	593.5	547.5	640	754	634.5	723	661.5	728	699	682.5	666.5	646.5	660.5	587	577.5	646.5	629.5	677.5
AT1G15510	6.5	8.5	8.5	2.5	10	16	12.5	0	3	58	17.5	0	4.5	5.5	9.5	2.5	3	6	3.5	7	2	10.5	1	6	0	3.5	3	7
AT1G15520	33.5	6	17.5	12.5	15.5	8	17	0	11.5	10	15	0	6	18	11.5	8	29	7	11	13.5	12.5	5.5	1	4.5	9.5	10.5	10.5	12
AT1G15530	39.5	24.5	8.5	27	21.5	12.5	33.5	10.5	38	26.5	20.5	18	16.5	35	22.5	19	19	23.5	19	15.5	8	23.5	26.5	17.5	37	18	26	19.5
AT1G15540	156	207	131.5	39.5	73	61.5	54	94	74	209	120.5	169.5	116.5	102	95	168.5	99.5	122.5	142.5	44.5	24.5	58.5	89	47	13.5	105	88	119.5
AT1G15550	34.5	52	54.5	45.5	50.5	48	65.5	42.5	70.5	19.5	66.5	21.5	72	62.5	73	58	38.5	50	49.5	52	49	46.5	38	59	37	64.5	48	56
AT1G15570	24.5	10.5	45.5	55	45	70.5	56	52.5	46	26.5	43.5	26	38.5	42.5	42.5	41.5	38.5	46	37.5	36.5	41	35.5	76	37	51.5	51.5	39.5	35
AT1G15625	8	10.5	8.5	3.5	1.5	4.5	5	0	5.5	7	5	26	0	3	0	2.5	3	3.5	3.5	2.5	2.5	0	1	9.5	0	5	8	12
AT1G15630	6.5	0	0	1	1.5	2	0	9	0	0	0	0	0	0	0	3.5	1.5	1	0	0.5	2.5	1	1	0	18	0	5.5	5
AT1G15640	1	6	2.5	2	2	2	0	0	0	0	0	13.5	2	0	2	2.5	0	2	6.5	2	5.5	0	1	8	9.5	2.5	0	5
AT1G15660	44.5	52	47.5	55.5	51.5	48	67.5	44.5	56	58	51	50.5	38.5	37	58	52.5	45	46	46	54.5	51	48	76	41.5	41.5	61	50.5	35
AT1G15670	36	42.5	29	20.5	32	17	18.5	14.5	20	43.5	56	42.5	20	30.5	33.5	31	14	24.5	20.5	33	21.5	23.5	63.5	17.5	27.5	29	26	22.5
AT1G15690	1526	1427	1577	1507	1427	1607	1411.5	1607	1588	1393.5	1330	1218.5	1220.5	1345.5	1383	1378.5	1559.5	1621	1485	1575.5	1621	1391.5	1452.5	1627	1301.5	1627	1767	1559.5
AT1G15710	50.5	42.5	17.5	32.5	29	32	23.5	36.5	38	40.5	40.5	30	28	30.5	39.5	42.5	22	34	27.5	38	37.5	41.5	26.5	37	41.5	31	42.5	30
AT1G15730	21	33.5	29	12.5	4.5	0	18.5	9	11.5	10	20.5	0	17.5	21	15	22.5	14	20.5	19.5	20.5	13	8	26.5	13.5	13.5	18	8	9.5
AT1G15740	363.5	301	275.5	280.5	315	300.5	213.5	359	242.5	218.5	305.5	273	272	262	275	264.5	318	251	277.5	315	262.5	347.5	283	324.5	219.5	307.5	309.5	352.5
AT1G15750	866.5	858.5	698	742.5	735.5	703	690.5	651.5	735.5	1151	878.5	559	509	745.5	690	535	706	632.5	630	709	660.5	628	1194	637	907.5	712.5	741	776
AT1G15760	8	13.5	17.5	7	13.5	14.5	17	24.5	11.5	23.5	12.5	13.5	19	16.5	17	10.5	14	18.5	17	10.5	19.5	11.5	1	15.5	27.5	9.5	13	27
AT1G15780	252	257.5	220.5	228.5	201	195.5	208	217	242.5	277	243	119.5	145	243.5	238.5	184.5	217.5	194	226	237.5	243.5	212.5	225.5	198	271.5	267.5	185.5	244
AT1G15790	15	19.5	13.5	24.5	11.5	14.5	18	21	15.5	10	10	13.5	32	19.5	18.5	22.5	17	20	18	21.5	13.5	12.5	50.5	17.5	13.5	21.5	8	5
AT1G15800	15	22.5	24.5	25.5	32	25	21.5	29	16.5	23.5	28	21.5	25.5	16	22.5	24.5	14	26	19	21.5	16.5	25.5	15	49	32	18	18	17
AT1G15810	65.5	99	102	81	96	83.5	86.5	62	107.5	58	69.5	97.5	98.5	90.5	91	115	115	110	95	81.5	101.5	81	141.5	71.5	128	62	59.5	70.5
AT1G15820	81	60.5	47.5	31	63.5	61.5	63	60	61.5	40.5	59	97.5	89	56	37.5	88	85	42.5	44	60	58.5	74	50.5	91	86	81	42.5	61.5
AT1G15860	137.5	135	134	132.5	139.5	110	104.5	98	127.5	151.5	168.5	106.5	160	152	133.5	174	121.5	147	139	131.5	122	115	141.5	145	76	125.5	153.5	111
AT1G15870	0	0	2.5	3.5	6	6	5	5.5	5.5	0	0	0	7	3.5	3.5	3.5	1.5	6.5	4.5	6	7	1.5	15	2.5	0	8	15.5	2.5
AT1G15880	98.5	70	90	108	101.5	84.5	94	74	91	61.5	88	84.5	118.5	115.5	112	134	105	107.5	108.5	90.5	103.5	113	128.5	71.5	51.5	72.5	116.5	80.5
AT1G15885	2.5	2.5	4.5	0	3.5	1	2.5	0	1	0	0	0	0	3	2	0	7	1	2	1	2	1	1	0	0	1	8	7
AT1G15890	6.5	6	8.5	5	8.5	10.5	5	0	3	0	0	0	4.5	5.5	3	9	3	4.5	8	5.5	5.5	4.5	1	6	0	8	8	14.5
AT1G15900	0	0	2.5	1	0	0	2.5	0	1	0	3	6	2.5	1	4	2.5	4.5	0	3.5	0	1.5	0	1	0	0	2.5	3	7
AT1G15910	30	38	56.5	62.5	58.5	50.5	64.5	44.5	53	80	43.5	42.5	44.5	62.5	56	44.5	38.5	53.5	59	59.5	85.5	91	114	57	46.5	87	29	38
AT1G15920	49	56	56.5	76	64.5	55	60	62	54	105.5	82.5	50.5	57	68	59.5	56	48.5	66.5	55	58	55	56	50.5	57	61	50	85.5	40.5
AT1G15930	456	433	495	540.5	524.5	517	656	547.5	585	683	429.5	373	596	527	547.5	538	621	758.5	574.5	532.5	569	524.5	357.5	434	533.5	590	536	453
AT1G15940	76.5	84.5	99.5	88	102	94	66.5	76	84.5	68.5	79.5	102	81.5	78	76	70.5	83.5	80	94	106	101.5	92	89	61	122.5	77.5	82.5	128.5
AT1G15950	197	147	205	126.5	135	125.5	169.5	136	138	76	179	200	127.5	160	135	111	132.5	75	107	161	146.5	182	63.5	152	198	151	129.5	179
AT1G15960	1	0	0	12.5	10	17	10.5	3.5	4.5	0	7	0	2.5	3.5	3	5.5	1.5	2.5	5.5	7	4.5	5.5	1	11.5	9.5	0	8	5
AT1G15970	54	52	52	55.5	47	67.5	54	46.5	57.5	80	22.5	42.5	57	47.5	42.5	62	38.5	38	42.5	39.5	76	55	50.5	49	32	40.5	21	40.5
AT1G16000	25.5	10.5	32	50	57	56	64.5	34.5	72.5	19.5	23	21.5	50.5	36.5	49.5	71.5	45	61.5	45	49.5	43.5	43.5	26.5	53	41.5	40.5	23.5	40.5
AT1G16010	215.5	145	109	182.5	180	142.5	187	240	165	190.5	179	169.5	183.5	170.5	189.5	194.5	227	224	190.5	169.5	168.5	207	101.5	216.5	143.5	192.5	206.5	151
AT1G16020	64	60.5	72.5	55	64.5	70.5	49.5	60	46	51	59	30	60	63.5	52	61.5	48.5	63.5	69.5	58	71.5	52	63.5	76	86	69.5	97	97.5
AT1G16030	15	24.5	20	15	16	20	26	34.5	9	51	12.5	21.5	23.5	24.5	26	13.5	29	21.5	21.5	28	21.5	15.5	38	6	32	18	29	33
AT1G16040	50.5	47	45.5	54	58	43.5	45.5	52.5	51.5	58	48.5	30.5	50.5	59	49.5	60	38.5	65.5	85.5	62	61.5	64.5	50.5	76	32	53.5	65.5	38
AT1G16060	33.5	70	13.5	21	15.5	25	26.5	31	12.5	16	38	54.5	24.5	38	19.5	20	38.5	19	23.5	22.5	22.5	18.5	1	23.5	46.5	20	37	7
AT1G16070	9.5	0	8.5	9.5	14	22.5	12.5	16.5	16.5	0	15	26	13.5	22.5	9.5	15	20.5	6	7	10	10.5	11.5	1	8	0	6.5	3	2.5
AT1G16080	25.5	38	27	30	27.5	36	33.5	16.5	30	51	28	47	31	22.5	29	29	43.5	25	36	33	29	41.5	38	35	37	40.5	32	17
AT1G16090	2.5	4.5	2.5	3.5	6	7	3.5	9	6.5	13	7	0	4.5	1	3.5	8.5	7	11.5	5	7	6	5.5	1	0	5.5	6.5	15.5	2.5
AT1G16110	5	2.5	15.5	3.5	5	2	2.5	2	3	10	0	6	4.5	4.5	11.5	7	1.5	6.5	6.5	8	3.5	6	1	8	5.5	10.5	18	5
AT1G16120	19.5	35.5	20	25.5	19	17	15	32.5	22.5	58	48.5	30.5	21	11.5	25	17	22	10.5	17	20	14.5	20	15	15.5	27.5	16.5	10.5	22.5
AT1G16130	15	24.5	15.5	14	18	9.5	6	14.5	12.5	0	12.5	10	12.5	10.5	12.5	7	1.5	14.5	10	14.5	9.5	6	38	13.5	0	9.5	5.5	7
AT1G16150	9.5	8.5	6.5	4.5	2.5	2	8	5.5	3	13	7	26	7	6	4.5	10.5	1.5	5.5	5	7	2	6	15	13.5	0	6.5	3	2.5
AT1G16160	3.5	6	4.5	1	1	1	4	0	0	13	3	10	7	1	4	1.5	0	2.5	1	2	1	3.5	1	4.5	0	1	0	14.5
AT1G16170	43.5	42.5	40.5	45.5	48.5	46.5	49.5	46.5	46	94.5	64.5	62.5	47	51	58	57	70.5	58	56	49	60	41.5	1	61	76	46.5	88	40.5
AT1G16180	836.5	860	844	695	638.5	527	636.5	686.5	640	790	862.5	547.5	677.5	706.5	759	641.5	677.5	671	737	745.5	611.5	619.5	713	903.5	571	723	698	752.5
AT1G16190	122.5	142.5	109	152.5	165	180	170.5	158.5	158.5	130.5	74	115	147.5	169.5	165.5	165.5	153.5	161.5	146	120.5	168.5	135	241	115.5	251	149.5	168.5	128.5
AT1G16210	151.5	209	208	154	176.5	131	197	174	153	94.5	187	133	229.5	168.5	177	174.5	168.5	149	145	155	140.5	173	101.5	194.5	133	148.5	114	131.5
AT1G16220	29	40.5	27	28	31	22.5	30	31	18	19.5	56	30.5	16	24.5	22.5	19.5	15	26	20	19	21.5	18.5	15	39	13.5	15.5	53.5	22.5
AT1G16240	179	110.5	177	165.5	200	134	182	148.5	151.5	109	220.5	106.5	235.5	173	186	205	203.5	158.5	160	146.5	187.5	154	183	133.5	183.5	146	131.5	137
AT1G16250	21	26.5	20	25.5	25.5	37	28	10.5	14	61.5	28	30.5	22.5	30	33.5	21.5	20.5	28.5	23.5	27.5	17	44.5	1	15.5	22.5	29	26	33
AT1G16260	3.5	0	0	1	0	0	0	11	1	0	7	0	2	0	0	0	0	1	3.5	2.5	1	4.5	1	0	5.5	1	0	5
AT1G16270	131.5	191.5	115.5	175	147.5	158	144.5	158.5	178	230	126	165	70.5	147	162.5	90	119.5	112	97.5	158	193	143.5	89	115.5	168.5	145	165.5	144
AT1G16280	30	38	20	35	26	23.5	32	34.5	34.5	80	40.5	35	32	32	24.5	27	38.5	23.5	30	30	43.5	21	26.5	25.5	41.5	33.5	32	14.5
AT1G16300	90	99	159.5	182.5	141.5	111	161.5	115.5	127.5	76	85	146	144	132.5	173	117.5	118	147	119.5	128.5	95	130	128.5	140	158.5	100	163	97.5
AT1G16310	61.5	77	54.5	77	79	59	77	79.5	57.5	51	43.5	42.5	72.5	64.5	70	88.5	78	55	71.5	55	65.5	68	63.5	51	76	39.5	34.5	38
AT1G16320	43.5	47	63.5	47	42.5	53	38.5	48.5	49	65.5	40.5	89	38.5	33	27.5	58	45	48.5	29	43.5	47.5	51.5	26.5	41.5	65.5	51.5	21	38
AT1G16330	16.5	4.5	32	22.5	30	32	11.5	29	28	23.5	20.5	26	16	27	17	26	27	29.5	22.5	17	22	17	1	8	13.5	29	34.5	24.5
AT1G16340	52	42.5	27	58	58	61.5	51.5	60	57.5	30	56	58.5	60	53.5	49.5	45.5	32	57.5	43.5	47.5	55	56	76	57	51.5	43.5	59.5	61.5
AT1G16350	213.5	155	180	215.5	205	234	227.5	171.5	239	159	175	146.5	206.5	253	196	207.5	259	239.5	217	200.5	255	203	225.5	194.5	208	198	150	194.5
AT1G16370	32	24.5	17.5	5	4.5	0	5	21	6.5	13	25.5	0	13.5	8.5	11.5	21.5	32	18.5	17	10	10.5	8	1	6	9.5	9.5	15.5	9.5
AT1G16390	10.5	2.5	6.5	1	1	0	1.5	0	0	0	3	6	1.5	1	1	1.5	4.5	0	2.5	3.5	0	0	1	8	0	0	3	7
AT1G16400	221.5	189	208	55.5	100	83.5	208	130.5	179	215	232	220.5	273	254.5	254	301.5	303	233	246	122.5	137.5	163	128.5	209	174	222.5	238	225.5
AT1G16420	9.5	0	2.5	1	2	2	0	12.5	4.5	0	0	0	5	1	3	2.5	1.5	3.5	4.5	0.5	0	0	1	0	5.5	1	3	0
AT1G16430	8	8.5	24.5	16	5.5	14.5	11.5	22.5	6.5	58	10	0	9.5	8	10	9.5	6	14.5	9.5	8	6	8	26.5	21.5	5.5	13.5	5.5	19.5
AT1G16440	9.5	2.5	4.5	4.5	2.5	4.5	0	5.5	8	13	3	0	9	4.5	7	17	6	7	7	3.5	1	0	15	0	5.5	8	0	14.5
AT1G16445	3.5	0	0	3.5	1	4.5	1.5	0	2	0	0	0	2	3	3	3.5	3	2.5	2.5	0.5	4.5	1	1	15.5	9.5	3.5	0	7
AT1G16460	183.5	157.5	223.5	169.5	154	175.5	165	131.5	200	151.5	146	182.5	164	180.5	162	173	196	190.5	168.5	197.5	248.5	220.5	101.5	145	203.5	164.5	175	172.5
AT1G16470	207.5	187	284.5	283	237.5	209	215.5	242.5	225	201.5	279.5	263	278.5	230	263	253	295	301	232.5	257.5	268.5	227	324.5	279.5	261	224	238.5	246
AT1G16480	2.5	2.5	8.5	6	1.5	8	18	21	11.5	7	7	21.5	6	7	11.5	4.5	7	8	10.5	8	6	15.5	1	4.5	9.5	9.5	0	5
AT1G16500	59.5	67.5	54.5	33	34	20	56	44.5	54	43.5	38	66.5	55	50	49	60.5	45	51.5	53	33	36	35.5	63.5	33.5	27.5	42.5	37	78
AT1G16510	15	26.5	20	21.5	7	14.5	26.5	22.5	20	7	28	26	33.5	21	17	18	10.5	10	15	9.5	13	11.5	1	4.5	18	5	21	9.5
AT1G16520	103	108	72.5	113	119.5	122.5	115	121.5	119	112.5	112	119.5	106.5	109	95	117.5	110.5	102	105	112	119.5	117.5	38	109.5	113	113	65.5	80.5
AT1G16530	56.5	42.5	61.5	23.5	27	21.5	44	50.5	25.5	19.5	56	21.5	70.5	38.5	44.5	53	58.5	40.5	31	22.5	27	32	15	47	13.5	35	15.5	38
AT1G16540	100	77	68.5	87.5	89.5	75	79	92	103.5	145	85	38.5	45.5	83.5	76	78.5	81.5	77	94	96	70.5	89.5	76	81	128	81	85.5	85.5
AT1G16560	254	189	196	229.5	201.5	201	185.5	225	209.5	242.5	214	191.5	228.5	233	201.5	224	199.5	230	218	223.5	215.5	186.5	168.5	216.5	208	217	194.5	194.5
AT1G16570	61.5	38	65.5	60	77	75	67.5	74	50	90.5	66.5	84.5	53.5	42.5	58	50.5	52	51	67.5	58	95	59.5	26.5	39	71.5	82.5	59.5	45.5
AT1G16590	5	10.5	11	10.5	9.5	9.5	22.5	12.5	10.5	19.5	10	13.5	21.5	13.5	13.5	11.5	20.5	19	14.5	10.5	13.5	11.5	15	6	9.5	15.5	10.5	22.5
AT1G16610	188	180	143.5	180	173	196	209.5	134	188	215	238.5	146.5	207	183.5	209	207	146.5	203	184	147.5	166	141	209.5	194.5	213.5	130.5	165.5	231
AT1G16630	32	22.5	40.5	30.5	25.5	21.5	20.5	40.5	33	26.5	23	18	31	30	20	24.5	41.5	23.5	28	22.5	22.5	19.5	15	19.5	32	33.5	15.5	22.5
AT1G16640	5	0	0	1	0	1	1.5	0	2	0	0	0	1.5	2	1	1.5	4.5	4.5	1	0.5	1	2.5	38	8	5.5	1	0	5
AT1G16650	29	60.5	11	26.5	29.5	21.5	14.5	29	38	30	23	10	27	22.5	23.5	25.5	29	33	34	24.5	23.5	17	63.5	15.5	41.5	26	29	27
AT1G16670	34.5	56	32	28	28	32	36.5	23	22.5	13	64.5	54.5	39.5	39.5	45.5	29	27	24.5	29	39	31	25.5	50.5	45.5	37	39.5	23.5	14.5
AT1G16680	61.5	54	59	66.5	50	68.5	54	71.5	83.5	116.5	93	76	42	77	72	59	53.5	79	67.5	63.5	58.5	73	15	78.5	102	84.5	73.5	76
AT1G16690	22.5	15	24.5	24.5	23.5	33	17	12.5	24.5	10	36	6	24	31	24.5	22.5	17	36.5	18	21.5	23.5	23.5	26.5	21.5	32	12.5	18	12
AT1G16700	329	317	327	283	286	227	257.5	272	251	318.5	314	314	334	319.5	322.5	302	307.5	318	283	250.5	225	263.5	241	233.5	168.5	304	319	322.5
AT1G16710	191.5	155	177	170.5	137	144	123.5	148.5	167.5	209	120.5	165	82	153.5	153	115	103.5	113	142.5	153	156	172.5	63.5	178	189	156	175	184
AT1G16720	130.5	153	74.5	125	122.5	96.5	131.5	140.5	117.5	105.5	115	30.5	135	126	106.5	114	107	83	91	126	107.5	95	38	99	96.5	67.5	53.5	128.5
AT1G16740	48	82	63.5	90	72.5	57	69.5	77.5	78	65.5	88	84.5	103	79.5	80	85.5	62	85.5	61.5	64.5	64.5	59.5	141.5	53	76	45.5	76.5	43.5
AT1G16750	3.5	2.5	0	1	0	1	5	2	2	0	10	0	6	1	4	4.5	19	3.5	2.5	2	2.5	6	1	0	0	0	10.5	0
AT1G16780	19.5	15	13.5	32.5	26	33	27.5	19	25.5	16	28	6	19.5	24.5	29	19	34	25.5	23.5	27.5	33	27.5	38	47	41.5	22.5	29	38
AT1G16800	43.5	47	47.5	42.5	55	42.5	40.5	32.5	40.5	87	69.5	38.5	29	63.5	45	31	38.5	46	55	42.5	49	55	76	45.5	107	67.5	42.5	43.5
AT1G16810	156	116.5	121	133.5	128.5	156	144	115.5	129.5	137	122.5	97.5	167	115	137.5	164	173	162	146	139	133.5	124.5	63.5	156.5	237.5	179	126	151
AT1G16820	2.5	15	0	2.5	2.5	4.5	3.5	0	4.5	0	10	0	10.5	3.5	4	7	6	4.5	5	7	2	4.5	38	4.5	0	5	10.5	14.5
AT1G16825	5	8.5	11	11.5	13.5	2	14.5	24.5	16.5	0	0	0	11.5	8	8	8.5	4.5	9	9.5	11	11.5	5.5	15	17.5	0	9.5	23.5	7
AT1G16830	1	4.5	4.5	8	7	9.5	5	3.5	3	0	3	10	4.5	10.5	8	2	12.5	5.5	9	4.5	7	5.5	26.5	31.5	9.5	8	13	7
AT1G16840	94.5	101	59	97.5	90	123.5	107	104	127.5	94.5	79.5	93	149	107.5	101	137	89	107	108	128.5	82	103.5	26.5	74	71.5	94	108.5	78
AT1G16850	24.5	6	32	133.5	149	206.5	76	71.5	79.5	61.5	56	66.5	43.5	33	27	19	20.5	38	34	105	94	126	26.5	33.5	51.5	29	26	67.5
AT1G16860	265.5	217.5	284.5	263.5	284.5	264.5	297	288	246	242.5	269.5	276	199.5	227	260	215.5	249	226	245	261	267.5	241.5	114	292	237.5	224	197	270
AT1G16870	67.5	110.5	59	111	121.5	132.5	106	111.5	101	68.5	93	84.5	106.5	103.5	135	102.5	108.5	161	113	120.5	103.5	101.5	101.5	47	133	81	126	111
AT1G16880	144.5	137.5	94	136	146	108	116.5	136	150	159	123.5	187	156	129.5	138.5	183.5	139.5	174	156	189	160	169.5	101.5	147.5	183.5	159	194.5	146
AT1G16890	228.5	275	157	221.5	260	247.5	287	240	235.5	251	263	300	329.5	234	265.5	250	297	261.5	258.5	235.5	199	258.5	241.5	369.5	272	210	214.5	217.5
AT1G16900	71.5	63.5	99.5	90	64.5	128.5	82.5	58	82.5	127	49	47	62.5	83.5	76	67.5	62	93	82	81.5	98.5	74	63.5	69.5	137.5	84.5	48	100.5
AT1G16905	8	19.5	0	3.5	5	2	7	0	9	26.5	15	18	8	9.5	5.5	9	3	0	4.5	9	7	10.5	15	19.5	13.5	18	0	7
AT1G16916	5	2.5	13.5	15.5	17.5	17	10	5.5	8	47.5	20.5	0	19.5	21.5	8	19	10.5	21.5	15.5	8	14.5	12	26.5	17.5	0	16.5	18	17
AT1G16920	90	153	92	140	169.5	146	157.5	147	114	112.5	138.5	106.5	122.5	131.5	123.5	139	136	157	150.5	134	161.5	140	196.5	147.5	189	141.5	178.5	134
AT1G16930	34.5	29	49.5	25.5	17.5	10.5	10	48.5	32	37	33.5	42.5	24.5	26.5	19.5	25.5	34	40.5	36	17	23.5	30	15	55	32	53.5	29	67.5
AT1G16960	5	0	8.5	0	0	1	2.5	0	1	0	0	0	3.5	0	2	4.5	1.5	0	1	0	2.5	0	1	0	0	3.5	0	2.5
AT1G16970	59.5	49.5	65.5	51	62.5	73.5	56.5	62	57.5	61.5	54	50.5	65.5	63.5	64	61	32	64.5	60	64.5	64.5	54.5	128.5	76.5	37	72.5	85.5	80.5
AT1G17020	54	26.5	32	69.5	60	49	61.5	81.5	47.5	84	49	38.5	90	68	71.5	53	65.5	51	49.5	69.5	53.5	45.5	101.5	45.5	41.5	32	40	24.5
AT1G17030	12.5	8.5	6.5	1	12.5	4.5	14	11	9	16	12.5	6	8	11.5	12.5	10.5	12.5	5	11	9.5	5.5	9	1	8	9.5	3.5	18	0
AT1G17040	15	42.5	45.5	21	22.5	17	40.5	11	22.5	19.5	17.5	10	12.5	17	40.5	28	20.5	24.5	29	17	33.5	17	26.5	37.5	37	26	29	19.5
AT1G17050	122.5	121.5	129.5	159	142.5	154	127.5	150.5	120.5	80	129.5	71.5	114	106.5	101.5	105.5	97.5	84.5	88	132.5	89.5	118.5	141.5	95	117.5	118.5	103	128.5
AT1G17060	25.5	2.5	20	19.5	27	18.5	10	29	18	16	12.5	13.5	19	14.5	27.5	11.5	12.5	10.5	10.5	18	12.5	23.5	15	19.5	51.5	20	18	12
AT1G17070	32	38	22.5	40.5	32	18.5	52.5	44.5	33	30	36	10	44.5	33	45	37.5	37	43.5	25.5	43.5	34.5	33	63.5	15.5	61	39.5	40	51
AT1G17080	128.5	162	126	139.5	152	122.5	133.5	140.5	135	163	117.5	93	243	147.5	182.5	177	94	161	149.5	123.5	108.5	137	15	156.5	86	94	111	111
AT1G17090	13.5	26.5	6.5	22.5	23.5	6	12.5	23	20	23.5	5	0	19	11.5	10	16	32	11.5	18	11.5	7	6	1	11.5	27.5	18	15.5	14.5
AT1G17100	19.5	15	0	14	12.5	9.5	14.5	24.5	14	0	3	13.5	15.5	24.5	14	20.5	9	11.5	17	25.5	18	13.5	50.5	9.5	5.5	10.5	0	14.5
AT1G17110	141	147	141	157.5	157.5	174	133.5	132	161.5	147.5	109	146.5	120.5	141.5	136	130	137.5	170.5	154	154	169.5	146.5	89	122.5	117.5	163	94	137
AT1G17120	49	99	63.5	77	58	41.5	46	40.5	78	26.5	38	55	57	53.5	66.5	52	68.5	57	61	66.5	69.5	55	63.5	91	32	77.5	91	83
AT1G17130	58	79	74.5	77	84	97	76.5	96	72.5	26.5	79.5	50.5	97.5	90.5	97.5	96	80	94	91	73.5	89	90.5	76.5	67.5	56	106.5	85.5	85.5
AT1G17140	12.5	19.5	15.5	30.5	22.5	23.5	37	31	22.5	34	12.5	18	33	44.5	29	38.5	37	38	35.5	21.5	18.5	34.5	15	37.5	32	29	8	9.5
AT1G17145	59.5	56	61.5	51	64.5	46.5	44.5	60	59	65.5	69.5	55	42	44.5	53	55	60.5	52	43	50	47	46.5	15	71.5	41.5	62	37	64
AT1G17147	37.5	47	54.5	32.5	34	28	28	36.5	35	10	71.5	62.5	94	71.5	66.5	80	57	61.5	62.5	39	19.5	34.5	1	15.5	9.5	32	65.5	35
AT1G17160	52	52	65.5	46.5	49.5	68.5	72	36.5	70.5	87	88	42.5	72	63.5	58	72	81.5	70	59	73	52	41.5	26.5	76.5	86	68	40	38
AT1G17170	759	783	843.5	1105.5	1187.5	784.5	850	922.5	827.5	782	754.5	862.5	1566.5	1177.5	1288	1096	1122	722.5	922.5	742.5	574	961	533.5	624.5	598.5	751.5	778	788
AT1G17180	502.5	544.5	448	1133	1233.5	805	677.5	856.5	805	771.5	597.5	758.5	1411.5	1214	1347	907.5	938.5	737.5	714	660	629.5	685	714	529.5	577.5	532	596	476.5
AT1G17190	258.5	297	199.5	179	160.5	159	186	246	230	109	200.5	243	342.5	284	301	392.5	291	275.5	315	205	141.5	182.5	89	168.5	158.5	244	277	200.5
AT1G17200	0	2.5	6.5	4.5	0	1	11.5	3.5	3	0	3	10	0	11.5	4.5	2.5	0	5	2.5	2.5	5.5	1.5	1	6	0	3.5	5.5	0
AT1G17210	279.5	259	354.5	317	329.5	266.5	302	329	295	334	288.5	348.5	186	315	240	216.5	253	196	250	295.5	305.5	286	196.5	239.5	203.5	283	289.5	339.5
AT1G17220	74.5	49.5	56.5	81.5	104.5	99.5	65.5	58	101	133.5	101.5	102	52	89.5	63.5	43.5	80	59.5	84.5	103	96.5	113	153.5	115.5	113	94	56	78
AT1G17240	6.5	0	6.5	1	6	0	1.5	11	4.5	10	5	21.5	3.5	4.5	6	2	4.5	3.5	5	3.5	2.5	3	1	2.5	9.5	1	0	0
AT1G17255	1	10.5	2.5	0	1.5	2	5	7	3	0	0	18	0	3	0	1	1.5	0	1	2	1	0	1	0	0	0	3	0
AT1G17260	2.5	8.5	4.5	4.5	6	7	0	19	4.5	0	0	10	3.5	6	8	6	4.5	4.5	7	9.5	5.5	3.5	1	6	9.5	5	5.5	0
AT1G17270	19.5	22.5	24.5	25.5	26	13.5	31	11	22.5	0	28	13.5	22.5	31	21.5	21.5	15	21.5	22.5	20.5	26.5	19.5	128.5	23.5	5.5	15.5	34.5	27
AT1G17280	122.5	128.5	118.5	118.5	126	115.5	107	104	117.5	137	126	66.5	143	103	120	135	108.5	146.5	131.5	121.5	115	133	38	107	154	131.5	116.5	137
AT1G17285	10.5	8.5	17.5	28	19	22.5	15	7	14	13	7	18	19.5	11.5	22.5	20	22.5	23.5	14	19	20.5	18.5	1	15.5	27.5	31	15.5	22.5
AT1G17290	329	328.5	323.5	486	435	438	357.5	384	432	343.5	467	418.5	331.5	422	399.5	344	293	329	356	460.5	426	411	462.5	302	381	337.5	439	474
AT1G17300	15	8.5	34	8	10.5	8	10	7	12.5	51	3	50.5	12.5	11	11.5	10.5	22.5	21.5	14.5	8	5	5.5	26.5	9.5	13.5	15.5	10.5	22.5
AT1G17330	42.5	38	52	34	39.5	49	37.5	19	28	16	51.5	58.5	37	47.5	39.5	46	27	42.5	37	44.5	28.5	34	63.5	39.5	27.5	40.5	32	17
AT1G17340	84	74.5	77	104.5	124.5	92.5	59	121.5	74	105.5	138.5	169.5	122.5	117.5	126	102.5	74	90	109	98.5	71.5	76.5	76.5	87	86	76	48	59
AT1G17350	42.5	54	24.5	37.5	54.5	56	41.5	48.5	35	7	38	66.5	40.5	29	40.5	29	53.5	45	27.5	39	37.5	34	63.5	37.5	41.5	33.5	65.5	27
AT1G17360	87	106	111	116.5	109	122.5	85	115.5	110	141.5	141.5	62.5	73.5	109	107	99	94	105	117.5	116.5	120.5	136.5	63.5	107	154	139.5	120.5	187
AT1G17370	168.5	169.5	126	162	175.5	210.5	174	189	185.5	170.5	198	187	227	222.5	187.5	219.5	232.5	211.5	206.5	185.5	197	178	241.5	152.5	128.5	164.5	183.5	164.5
AT1G17380	6.5	0	20	3.5	3.5	7	4	12.5	3	16	7	6	8	3.5	8	10.5	14	11.5	10.5	6	5	4.5	1	13.5	0	3.5	3	9.5
AT1G17400	3.5	2.5	2.5	0	2	2	1.5	3.5	0	13	5	0	0	0	0	1.5	0	3.5	0	1	0	2.5	1	0	0	8	0	0
AT1G17410	13.5	17	29	22.5	26	21.5	16	16.5	16.5	0	54	18	18.5	17	21.5	15	17	15	16.5	15.5	10.5	23.5	38	21.5	22.5	21.5	29	14.5
AT1G17430	46.5	42.5	47.5	28.5	27	29	48	31	28	10	38	10	40.5	42.5	37	55	53.5	46	42.5	35	34.5	32	50.5	29	86	40.5	68.5	22.5
AT1G17440	167.5	172	162.5	129.5	134	153	147.5	174	148.5	167	168.5	151	98	161.5	180.5	142.5	123.5	129.5	132.5	161	136.5	118.5	63.5	137.5	198	139.5	153.5	184
AT1G17450	88.5	63.5	47.5	42.5	63.5	72.5	56	74	71.5	68.5	66.5	76	59.5	79.5	62.5	57.5	63.5	62	64.5	58	50.5	61	50.5	51	51.5	74.5	59.5	119.5
AT1G17455	19.5	17	13.5	22.5	20.5	17	13	14.5	10.5	19.5	7	13.5	21	16	16	7	27	11.5	15.5	18	19.5	14	15.5	15.5	51.5	31	15.5	5
AT1G17460	8	4.5	4.5	9.5	11.5	8	7	19	11.5	0	12.5	0	8	8	11.5	5	20.5	12.5	4.5	10	5.5	4.5	1	6	9.5	0	0	2.5
AT1G17470	233.5	230.5	180	239.5	202.5	263	243	182.5	270.5	137	226	208	206.5	217	211.5	197	214	236.5	205.5	243	263	224	183	196	137.5	264	223.5	162
AT1G17480	16.5	19.5	8.5	17	9.5	16	9	14.5	12.5	23.5	17.5	0	12.5	16	11.5	11.5	6	9	12.5	15.5	9	15	1	9.5	5.5	10.5	8	14.5
AT1G17490	22.5	15	24.5	19	20.5	10.5	21.5	21	16.5	43.5	10	30.5	35	15	24.5	24.5	37	23.5	18	21.5	28.5	27	1	11.5	27.5	23	21	40.5
AT1G17500	154	180	190.5	180	171.5	163	148.5	138	142.5	155	150.5	93	98.5	134	142.5	122	97.5	128.5	147	161	173.5	166.5	196.5	158.5	251	166.5	191.5	140.5
AT1G17510	19.5	19.5	52	32	20	28	37	34.5	30	13	20.5	50.5	35	31	28	20	17	23.5	19.5	22.5	19.5	18	1	47	9.5	24.5	37	17
AT1G17520	33.5	15	43.5	50	42.5	41.5	60	40.5	40.5	34	49	50.5	39	40.5	49.5	45	50	45	43	40.5	37.5	41.5	89	57	13.5	40.5	32	51
AT1G17530	76.5	82	104.5	96.5	63.5	64	85.5	81.5	91	90.5	46	50.5	87.5	71.5	71.5	66.5	83.5	70.5	61	72	68.5	72	89	74	168.5	61	100	56
AT1G17550	179	207	208	209	237.5	287	192	209	211.5	175.5	159	239	105.5	160	136.5	123.5	110.5	128.5	160	167	189	214.5	114	173	198	148.5	163	146
AT1G17560	21	13.5	24.5	16	17.5	12.5	14.5	16.5	18	7	20.5	0	22.5	19.5	28	36	25.5	28.5	25.5	23.5	22	15.5	15.5	32	13.5	32	13	9.5
AT1G17580	103	108	121	157.5	108.5	95	97.5	115.5	112	54.5	166.5	76	61	112	112	72.5	78	97	111	107	117.5	115	128.5	91	66	79	85.5	97.5
AT1G17590	74.5	40.5	74.5	52.5	55	65.5	36	69.5	47.5	105.5	49	84.5	53.5	54	62.5	62	72.5	73.5	77.5	61	55	65.5	76.5	57	56	71.5	68.5	61.5
AT1G17620	330.5	340	317	208	231	210.5	308.5	281	279.5	300	380	294	403.5	326	285.5	381	374	327	314	244.5	282	247	295.5	275.5	213.5	282	259	292.5
AT1G17630	3.5	0	2.5	6	5.5	17	9	9	8	19.5	5	6	4.5	2	6	3.5	1.5	7	4.5	7	6	6	1	6	0	5	0	0
AT1G17640	10.5	4.5	13.5	18	10.5	13.5	13.5	2	16.5	23.5	15	13.5	8	17	16.5	13.5	6	14	7	15	9	9	1	25.5	13.5	8	21	2.5
AT1G17650	10.5	10.5	8.5	19.5	21.5	8	20.5	3.5	21.5	7	12.5	18	16	14.5	10.5	14	19	26	9.5	19	18.5	15	50.5	25.5	37	15.5	8	12
AT1G17665	0	2.5	2.5	0	1	2	0	0	0	0	0	0	1.5	3	4.5	4.5	0	0	0	0	1	2.5	1	0	0	3.5	3	9.5
AT1G17680	85.5	101	99.5	75	90	76.5	85.5	71.5	66.5	76	106.5	55	70.5	94	82.5	94	99.5	64.5	88	91	95	94	89	109.5	51.5	100	103	45.5
AT1G17690	72.5	79	82	86.5	90	83.5	67.5	36.5	83.5	68.5	88	50.5	80.5	90.5	114	62.5	89	90	94	103.5	101.5	95	76.5	89	86	97.5	116.5	80.5
AT1G17720	306.5	360	250.5	293.5	292	230	241	312	307	264.5	302	273	258.5	278	283	279.5	215.5	318	322.5	259	268.5	284.5	393	240.5	362.5	307.5	242.5	343
AT1G17730	117.5	135	70.5	102.5	113	115.5	130.5	124	135	167	129.5	106.5	148.5	123.5	120	137.5	127	136	98.5	116.5	112	100.5	63.5	105	128.5	89	129.5	97.5
AT1G17745	364.5	410	370.5	396.5	426	401	429	388.5	445.5	436	410	483	490.5	438.5	401	424	464.5	366.5	385	323	403	455	168.5	330.5	354.5	447.5	317	453.5
AT1G17750	10.5	26.5	38.5	17.5	27	20	32	14.5	28	19.5	10	0	30	36	20.5	27	23.5	21	33	20.5	23.5	28.5	15.5	13.5	5.5	12.5	18	14.5
AT1G17760	114	126	107	80.5	82.5	89	96	104	97	123.5	109	133.5	103	125	104	99	91	98	84	104	93	99	38	111.5	96.5	101.5	114	91.5
AT1G17780	24.5	52	32	24.5	37	14.5	40.5	36.5	30	34	31	35	40.5	33	36.5	35.5	47	33	28	26.5	30	40.5	1	35	61	48.5	68.5	45.5
AT1G17790	43.5	24.5	22.5	19.5	34.5	30.5	31	24.5	26.5	37	12.5	13.5	19	28	32	21	25.5	36	25	27	28	24.5	38.5	32	22.5	27.5	23.5	40.5
AT1G17830	16.5	19.5	17.5	30.5	45.5	48	13.5	36.5	24.5	0	12.5	18	14.5	19.5	10	10.5	20.5	26.5	15.5	21.5	38.5	38.5	15.5	21.5	22.5	15.5	15.5	19.5
AT1G17840	13.5	6	24.5	28.5	30	39.5	31	31	25.5	7	23	43	18	27	35.5	18	6	26	17	47	25	27	38.5	15.5	56	42.5	21	9.5
AT1G17850	16.5	4.5	24.5	15	14	10.5	8	5.5	12.5	13	20.5	26	5	7	11.5	14	17	20	17	23.5	20	21.5	15.5	15.5	0	21.5	13	7
AT1G17870	3.5	15	6.5	6	8.5	6	9	5.5	8	19.5	7	13.5	5	9.5	5.5	3.5	9	5.5	13.5	5	7	9	1	11.5	0	12.5	0	2.5
AT1G17880	406	411.5	400.5	500	447	630	469	396	481.5	383.5	442.5	445.5	551.5	409	431.5	504.5	497.5	734	517	486	521	418.5	661.5	508	454	567	488.5	535
AT1G17890	204	153	212	200	165.5	166.5	230.5	201.5	191.5	130.5	169	93	183.5	176	181	175.5	155	189.5	187	174	224	177	101.5	147.5	117.5	185	197.5	225.5
AT1G17920	2.5	0	0	1	5	9.5	10	2	8	7	0	6	4.5	2	8	0	4.5	8	6	6	2.5	7	15.5	0	0	8	10.5	7
AT1G17930	24.5	40.5	27	45	23.5	49.5	35	56	30	65.5	40.5	35	24.5	25.5	35.5	28	25.5	36	27	29.5	34.5	36	1	27.5	76	34	50.5	38
AT1G17940	15	56	13.5	32	34	34.5	27.5	31	22.5	0	56	71.5	20.5	21	29	37	20.5	28.5	31	39.5	28.5	42.5	26.5	39.5	81	51.5	42.5	22.5
AT1G17950	33.5	13.5	32	29	31	36	22.5	27	21.5	30	25.5	18	27.5	21.5	30	27.5	27	25	20	19	18	34.5	15.5	35.5	37	20	34.5	30
AT1G17960	18	13.5	17.5	15	16	21.5	14.5	9	14	0	28	13.5	14	16	13.5	17	17	18	16	12.5	23.5	13.5	15.5	21.5	5.5	21.5	15.5	19.5
AT1G17970	72.5	60.5	27	35.5	43.5	46.5	46.5	48.5	49	30	38	84.5	53	45.5	36.5	47	55	47.5	39	41.5	56	45	114	45.5	51.5	40.5	37	35
AT1G17980	74.5	72	72.5	89	94.5	83.5	100	85.5	92.5	90.5	85.5	128.5	71.5	68.5	74.5	82	78	72.5	72.5	93	82	99	76.5	74	81	118.5	141.5	85.5
AT1G18030	22.5	15	20	27	10.5	25	24.5	16.5	16.5	19.5	31	6	25.5	25.5	20.5	19	20.5	21.5	18	22.5	20.5	29	38.5	45.5	18	15.5	34.5	27
AT1G18040	16.5	40.5	24.5	31	40.5	44.5	44.5	34.5	43	19.5	25.5	26	30	35	40.5	37.5	37	57	53.5	36.5	44.5	19.5	1	25.5	56	39.5	34.5	56
AT1G18060	37.5	44.5	38.5	30.5	21.5	36	26.5	27	28	30	10	6	34.5	24.5	25	36	41.5	37.5	29	23.5	34.5	21.5	26.5	13.5	22.5	12.5	10.5	27
AT1G18070	350	374	396.5	414	386.5	426	344	362	377	417.5	408	404	345	386.5	393	360	371	413	372	404.5	444	410	357.5	408.5	480	417.5	472	476.5
AT1G18075	8	8.5	13.5	5.5	5	8	1.5	3.5	2	0	0	26	2	6	2	5	4.5	6	3.5	1	1	8	1	9.5	5.5	6.5	10.5	2.5
AT1G18080	1214	1252	1202	1392	1374	1355.5	1709.5	1442.5	1463.5	1346	1365	955	1451	1511.5	1392	1385	1297.5	1665.5	1385	1290.5	1405.5	1322.5	1377.5	1392	1063	1287.5	1255.5	1148
AT1G18090	10.5	13.5	17.5	10.5	7	13.5	8	14.5	4.5	16	0	26	6	16	9.5	4.5	3	7	15	13.5	9.5	10.5	15.5	15.5	18	2.5	5.5	17
AT1G18100	12.5	10.5	4.5	25.5	25.5	26.5	8	14.5	22.5	0	10	10	23.5	16.5	23.5	23.5	7	9	11.5	26	22.5	9.5	26.5	11.5	0	1	5.5	19.5
AT1G18140	54	40.5	65.5	50	50	53	44	58	22.5	54.5	59	35	68.5	61	62.5	74.5	41.5	51.5	79	34	45.5	32	1	35.5	18	59.5	32	40.5
AT1G18150	230	212.5	199.5	185	193.5	205	152	189	194	133.5	259.5	263.5	158.5	175	192	179.5	181	180	190.5	206.5	182.5	183.5	196.5	224	169	265.5	194.5	273
AT1G18160	221.5	248.5	251	219.5	217	198	219.5	272	272	321.5	251	187	153	211.5	225	196.5	216	201.5	218.5	235.5	234	243	128.5	294	251	221	245	214.5
AT1G18170	9.5	6	4.5	1	6	7	8	5.5	9	0	3	26	5	6	0	7	4.5	1	5.5	8	5	3.5	1	0	0	8	8	2.5
AT1G18180	12.5	26.5	15.5	17.5	11.5	9.5	10.5	14.5	21.5	0	12.5	6	13.5	8.5	11.5	8	10.5	13.5	13.5	11.5	9.5	9	1	9.5	13.5	26	10.5	2.5
AT1G18190	79.5	54	94	96.5	81	98	72	96	84.5	54.5	138.5	138.5	70	79.5	90	70.5	93	50	69.5	80	89	96.5	15.5	81	117.5	87	88	67.5
AT1G18200	13.5	29	13.5	9.5	27.5	12.5	15	14.5	21.5	0	15	18	18.5	26.5	17	19.5	15	18	17	19	19.5	21	26.5	32	13.5	8	13	12
AT1G18210	165	124	155	158.5	174	145	158.5	126	160	133.5	184.5	115	214.5	154	157	178	127	148.5	136.5	152	115	133	63.5	119.5	128.5	131.5	145	85.5
AT1G18250	42.5	56	102	92	119.5	94	115.5	85.5	115	40.5	59.5	50.5	99	98.5	91	117.5	107	121.5	84.5	81	124.5	72	153.5	65	81	42.5	56	40.5
AT1G18260	191.5	187	241.5	181	198	149	196	203.5	196	186	179	106.5	175.5	154	181	154	166.5	136	162.5	176.5	141.5	209.5	89	224	225.5	161	180.5	128.5
AT1G18270	549	574	465.5	392.5	421	353.5	424.5	418	407	352.5	492	495	283	360.5	383.5	326	291	325.5	378.5	483	378.5	378.5	411.5	394	387.5	471.5	500	538
AT1G18290	5	8.5	4.5	4.5	2.5	2.5	8	3.5	2	0	17.5	6	8	7	4.5	5	1.5	3.5	7	3.5	3.5	6	1	4.5	0	6.5	10.5	14.5
AT1G18300	8	19.5	6.5	2	4.5	14.5	9	9	4.5	0	20.5	10	5	9.5	4	2.5	0	9	8	5.5	9.5	5.5	15.5	0	13.5	1	3	5
AT1G18320	2.5	2.5	11	5.5	5.5	2.5	7	3.5	8	0	25.5	0	5.5	6	9	10.5	9	10.5	5.5	6	5.5	5.5	26.5	0	9.5	8	0	2.5
AT1G18330	58	58.5	63.5	35.5	35	50.5	41.5	34.5	42	30	49	43	57.5	52.5	43.5	65.5	60.5	55	50.5	44.5	48.5	38.5	76.5	81	81	51.5	85.5	54
AT1G18335	29	26.5	29	25.5	31	30.5	36	25	36.5	43.5	25.5	21.5	33.5	31	20	41.5	30	37.5	42.5	24.5	45.5	26	26.5	32	46.5	40.5	21	14.5
AT1G18340	40.5	17	38.5	27	36.5	20	29	36.5	32	51	28	35	19.5	31	31	24.5	27	42.5	32	27.5	32	33	38.5	33.5	13.5	26	18	22.5
AT1G18360	33.5	31	36.5	38	27	28	30	21	34.5	16	7	18	27	45.5	34.5	33	35	34.5	27.5	25.5	35	33	38.5	13.5	13.5	24.5	32	7
AT1G18370	39.5	52	29	49	70	72.5	68.5	56	92.5	84	59.5	89	53	64.5	59	43.5	41.5	55	55	58	60.5	62.5	50.5	29	41.5	42.5	37	59
AT1G18390	106	137.5	136.5	68.5	55	49.5	77.5	60	78	40.5	71.5	97.5	137	116.5	112	119.5	97.5	118.5	147.5	64.5	84.5	45	26.5	133.5	86	112	26	78
AT1G18410	2.5	2.5	0	2	3.5	0	0	0	1	34	3	13.5	3.5	0	4.5	1	0	1	2.5	0.5	3.5	3.5	1	2.5	0	3.5	15.5	0
AT1G18440	18	26.5	24.5	19	28	20	38.5	31	19	16	23	26	24	31	27.5	30	38.5	22	20.5	24.5	25	19.5	50.5	45.5	27.5	15.5	26	30
AT1G18450	156	153	196	164	195.5	193.5	201.5	147	176	90.5	153	133.5	140.5	192	167.5	144	175	193	161	148.5	178	149	114	194.5	113	151.5	150.5	88.5
AT1G18460	135	140	141	227.5	228.5	256	174.5	185	210	134	143.5	156	79	136.5	122.5	91	99.5	117.5	109	161.5	151.5	219.5	89	119.5	159	169.5	126	166.5
AT1G18470	117.5	155	94	125	146	128.5	103.5	150.5	127.5	127	132	273	186	147	138.5	156	136	126	162.5	142.5	130.5	127.5	168.5	105	96.5	141.5	173	140.5
AT1G18480	55	54	43.5	59	65.5	78	69.5	67.5	62.5	26.5	88	47	72.5	71.5	79	57	80	62.5	62.5	62	58.5	52	101.5	65	102	61	56.5	51
AT1G18485	0	0	0	0	0	7	0	5.5	5.5	0	15	6	2.5	3.5	3	2	0	1	0	5.5	2.5	3.5	1	11.5	0	1	15.5	0
AT1G18490	48	24.5	36.5	34	20	22.5	65.5	42.5	38	34	33.5	38.5	40.5	42.5	47	54	48.5	49.5	49	41.5	33	38.5	26.5	51	37	24.5	34.5	7
AT1G18500	130.5	110.5	180	126	145	128.5	161	88	133	116.5	164	111	119.5	166.5	156	140.5	181	150.5	146	151	135	141.5	50.5	91	128.5	183.5	135	151
AT1G18540	853	805.5	850.5	1116.5	1096	1087.5	1148	986	1025.5	783.5	989.5	681.5	1140	1078	1076.5	1066.5	1114.5	1347	1092	1086	1108.5	1025.5	790.5	885	1096	1082.5	1013	894
AT1G18550	16.5	2.5	11	14	15	26.5	28	34.5	32	13	17.5	10	22.5	20	21	16	29	23.5	24.5	16.5	19.5	12	89	13.5	18	40.5	29	19.5
AT1G18560	22.5	17	15.5	16	12.5	20	20.5	27	12.5	13	17.5	6	10.5	21.5	12.5	23.5	12.5	21.5	19	14	21.5	18.5	1	11.5	9.5	14	18	19.5
AT1G18570	5	6	20	23.5	19	14.5	10.5	14.5	34.5	19.5	23	0	5.5	6	10	7	9	13.5	11	18	16	18	38.5	19.5	13.5	18	8	14.5
AT1G18580	56.5	26.5	61.5	59	53	36	74.5	58	62.5	51	115	26	64	51	68.5	61	89	61	80	59	56	58	114	95	9.5	55	85.5	56
AT1G18590	137.5	155	111	56	70.5	68.5	116.5	126	110	87	91	142.5	227	235.5	205.5	235.5	259.5	238.5	230	137.5	170.5	127	63.5	185.5	174.5	169.5	189	192
AT1G18600	49	47	17.5	46.5	39.5	34.5	50.5	27	46	51	33.5	30.5	50	49	38	33	48.5	41.5	40.5	36.5	38	42.5	50.5	76.5	66	36.5	32	33
AT1G18610	19.5	17	13.5	22.5	17.5	28	32	27	11.5	61.5	20.5	6	20.5	36	20.5	23.5	22.5	22	22.5	21.5	31.5	30	50.5	25.5	0	27.5	18	43.5
AT1G18620	34.5	26.5	29	54	43.5	21.5	29	19	47.5	87	20.5	58.5	38.5	40.5	41.5	49.5	41.5	42.5	42.5	43.5	49	46.5	15.5	35.5	13.5	53.5	26	35
AT1G18630	16.5	17	40.5	26.5	30	34.5	17	23	40.5	47.5	54	18	37	36	30	39.5	37	37.5	35	27.5	26.5	22.5	26.5	51	37	26	32	22.5
AT1G18640	82.5	54	54.5	69.5	77	69.5	72	74	91	80	59.5	76	97.5	62.5	81	79	81.5	99	88	73	85.5	76	50.5	47	32	72.5	65.5	80.5
AT1G18650	13.5	22.5	34	12.5	10.5	9.5	9	3.5	9	30	3	21.5	19	13.5	10.5	7	15	14.5	10	7	16.5	10.5	1	23.5	18	10.5	10.5	17
AT1G18660	167.5	217.5	180	169.5	163	177	153	179	165	167.5	190	146.5	173	196.5	173	146.5	155	159.5	167.5	129.5	162.5	176	38.5	150	193.5	127	123.5	108
AT1G18670	79.5	149.5	92	114	122.5	152	101.5	132	127.5	141.5	79.5	133.5	90	127	117.5	104.5	150	108	111	124	145	142.5	15.5	81	148.5	121.5	123.5	67.5
AT1G18680	18	4.5	15.5	9	10.5	16	5.5	7	5.5	0	3	10	14.5	7	12.5	12.5	10.5	14.5	9.5	14.5	7	14	1	2.5	18	8	10.5	9.5
AT1G18690	33.5	29	15.5	29	28	22.5	39.5	21	38	51	40.5	30.5	17.5	25.5	26.5	28	47	34	28	33	37.5	32	38.5	32	9.5	62	26	24.5
AT1G18700	91.5	99	102	111	137.5	131	117.5	85.5	134	163	61.5	84.5	142.5	98	103.5	111	112.5	110	116.5	128.5	105	97.5	89	142.5	76	115	129.5	114
AT1G18720	240.5	234.5	203	205	196	215.5	190.5	152	194.5	325.5	232	212	262	228.5	237.5	259	225	237.5	248	246	241.5	238.5	153.5	184.5	159	271	220.5	264.5
AT1G18740	56.5	31	47.5	47	45.5	38.5	44	48.5	36.5	37	49	62.5	52	35	50.5	49.5	50	36	46.5	45.5	45.5	38.5	76.5	47	46.5	23	34.5	61.5
AT1G18745	2.5	6	2.5	5	2	2.5	5	0	0	16	7	10	9.5	2	2	3.5	1.5	8	5.5	2	8	3.5	1	0	0	2.5	3	17
AT1G18750	10.5	6	6.5	2.5	4.5	8	3.5	2	10.5	0	25.5	0	1.5	4.5	7	6	7	10.5	3.5	3.5	1.5	3.5	1	0	13.5	5	10.5	5
AT1G18773	1	0	2.5	0	1	1	4	0	4.5	7	0	0	2	2	3.5	1	6	4.5	2.5	1.5	1.5	2.5	15.5	0	0	1	0	2.5
AT1G18800	94.5	77	90	133.5	141.5	128.5	124	92	138	112.5	112	97.5	131.5	113	130.5	115.5	162	145	137	101	131.5	117.5	76.5	112	237.5	142.5	106	119.5
AT1G18835	3.5	2.5	4.5	1	6	0	2.5	0	0	0	5	0	2.5	1	0	2.5	10.5	0	3.5	0.5	1	0	1	0	0	3.5	3	7
AT1G18840	111	172	165	153	151	152	166.5	163	165	47.5	126	142.5	137	130	135	145.5	163	130.5	172	150	172	176	283	146	154	175.5	114	166.5
AT1G18850	44.5	38	47.5	40.5	37	38.5	47	42.5	55	47.5	20.5	50.5	58.5	53.5	50.5	54	57	64.5	51	40.5	47.5	55	50.5	59	37	42.5	32	43.5
AT1G18860	32	29	11	22.5	20	12.5	16	19	20	40.5	25.5	18	21	24.5	34	22.5	25.5	16.5	22.5	21.5	15	14	50.5	33.5	18	10.5	15.5	14.5
AT1G18870	237.5	224	235.5	185	242.5	259.5	164	251	186.5	141.5	182	248.5	310.5	279.5	238.5	446	327.5	246	267.5	182.5	177	167.5	101.5	137.5	143.5	175.5	200.5	131.5
AT1G18880	373	323.5	454	222	212.5	238.5	306.5	277	281.5	472.5	309	373.5	153	265.5	240.5	262.5	288.5	201.5	235.5	246	261.5	247	310	342.5	277.5	319.5	317	378.5
AT1G18890	81	67.5	59	79	85.5	91	84.5	90	68	130.5	36	138.5	103.5	95	98.5	103.5	74	79	76.5	92	84.5	99	76.5	53	76	94	68.5	111
AT1G18900	57	82	75	77	78	60	97	67.5	94	47.5	79.5	62.5	54	86	82.5	54	68.5	59.5	68.5	81	101.5	82	141.5	71.5	46.5	62	68.5	70.5
AT1G18910	148.5	150	157	144	131	107	97	96	101	137	146	62.5	83	118.5	122.5	72.5	105	100.5	118	129.5	123.5	114	154	133.5	81	137.5	138	111
AT1G18940	3.5	4.5	13.5	6	12.5	6	10	9	1	0	0	10	11.5	7	9.5	5.5	1.5	2.5	6	10.5	5	6	1	8	0	6.5	3	14.5
AT1G18950	101	91	75	89.5	98	59	107	96	99.5	37	80	142.5	87.5	116.5	110	94.5	80	92.5	111	112	117.5	102.5	89	112	81	90	131.5	91.5
AT1G19000	417.5	442.5	359	376	378	383.5	369	446	370.5	439	414	560	308	381	327	424	327.5	327.5	330.5	404	360.5	411	463	381	560.5	407.5	358.5	394
AT1G19010	12.5	10.5	15.5	13.5	7	6	9	12.5	8	58	12.5	10	11.5	16.5	8	11.5	3	9.5	9.5	8	9	11.5	1	11.5	0	10.5	8	2.5
AT1G19020	33.5	29	27	23.5	50	10.5	26	31	18	26.5	20.5	71.5	69	30	45.5	29	29	25	19.5	25.5	18.5	19.5	26.5	27.5	18	34	21	30
AT1G19025	5	8.5	6.5	7	9.5	13.5	5.5	12.5	10.5	10	0	13.5	4.5	6	8	5.5	3	7	6.5	2	4.5	3.5	1	19.5	18	15.5	15.5	12
AT1G19050	180.5	227.5	188	49.5	38	50.5	85	34.5	47.5	155	132	203.5	55	39.5	45	65.5	81.5	60	80.5	36.5	38	41.5	50.5	67.5	76	99	88	140.5
AT1G19080	25.5	35.5	24.5	21	34	34.5	16	11	25.5	37	12.5	6	26.5	11	21	19	15	32	13.5	17	20	20	1	43.5	18	14	18	35
AT1G19100	36	47	43.5	37	30	36	44	48.5	51.5	43.5	12.5	26	33	65.5	36.5	34	43.5	43.5	42	41.5	50.5	30	1	35.5	51.5	31	48	56
AT1G19110	314	294.5	193	197	203	164.5	183.5	277	210	264.5	288.5	133.5	179	217.5	234	249	210	226	235.5	210.5	201.5	203	63.5	185.5	169.5	294	242.5	200.5
AT1G19120	50.5	35.5	54.5	42.5	45	39.5	37	60	54	65.5	25.5	59	54.5	38	45.5	46.5	43.5	48.5	43	49	45.5	64	38.5	51	37	56	37	67.5
AT1G19130	74.5	77	97	71.5	76	80.5	88	83.5	90	130.5	74	62.5	101	90.5	76	100.5	78	87	76.5	103	92.5	95	76.5	65	22.5	76	65.5	56
AT1G19140	111	101	63.5	147.5	119.5	118.5	128.5	145	123.5	147.5	99	156	119.5	102	124.5	117.5	112.5	107.5	104	121.5	123.5	136	63.5	67.5	137.5	113	91	122.5
AT1G19170	57	79	72.5	46.5	47.5	42.5	49.5	42.5	54	68.5	31	26	49	32	39	47	53.5	59.5	52	37	56	46.5	38.5	65	61	45.5	59.5	61.5
AT1G19180	186.5	162	212	154	187.5	220.5	179	212.5	193	246	198	208	309.5	247	213.5	300	184.5	263.5	300	248.5	189	170.5	226	200.5	314	231	183.5	270.5
AT1G19190	32	56	40.5	23.5	27	21.5	24.5	44.5	22.5	7	31	76	49	37	37.5	59	30	32	43	36	30	26	38.5	35.5	13.5	18	40	45.5
AT1G19200	13.5	4.5	0	7.5	10.5	6	10.5	7	3	13	12.5	0	4.5	1	7	10.5	3	10	8	8	9.5	6	1	8	0	12.5	18	24.5
AT1G19220	97.5	116.5	77	77	61.5	70.5	63.5	108	70.5	148	123.5	66.5	73.5	86	86	79	110.5	70.5	110	80	96.5	43.5	38.5	91	46.5	69.5	42.5	95
AT1G19230	103	119.5	146	132.5	127	117	103.5	148.5	107.5	105.5	138.5	156	92	136.5	114	102.5	85	89	112.5	131.5	133.5	116	154	95	113	77.5	62.5	97.5
AT1G19240	32	10.5	22.5	14	18	29	15.5	14.5	25.5	13	31	18	22.5	22.5	20	20.5	20.5	22	19	11.5	14.5	23.5	15.5	13.5	9.5	9.5	23.5	30
AT1G19250	1	8.5	8.5	5.5	6	2.5	1.5	5.5	3	0	0	6	0	0	1	1	0	0	6	6	5.5	7.5	26.5	17.5	0	5	18	0
AT1G19270	78	38	68.5	70.5	58.5	56	67.5	62	47.5	54.5	71.5	55	76	71.5	73	80	76	72.5	74	60	56	58	38.5	63	86	58	82.5	95
AT1G19290	34.5	24.5	24.5	32.5	28	30.5	20.5	21	34.5	30	15	30.5	10.5	29	23.5	18	25.5	36	29	28	36	34	1	17.5	22.5	32	15.5	27
AT1G19300	29	33.5	29	33	23.5	23.5	43.5	7	43	13	43.5	59	47.5	49	36.5	41.5	53.5	36	36	34	25.5	20	15.5	25.5	0	36.5	21	38
AT1G19310	37.5	40.5	36.5	49.5	45	56	44	100	32	34	23	35	50.5	27	46.5	53	37	55.5	56	46.5	46	39.5	51	43.5	41.5	48.5	34.5	30
AT1G19330	50.5	47	97	39.5	42.5	32	36	56	51.5	54.5	69.5	38.5	52.5	42.5	41.5	55	48.5	68.5	56	39	53.5	66.5	51	47	22.5	58	62.5	56
AT1G19340	10.5	6	6.5	14	9.5	7	10	12.5	10.5	0	28	0	5.5	9.5	11.5	13	7	17	15	8	9.5	8	1	19.5	13.5	5	26	17
AT1G19350	101	91	102	100	112	159.5	116.5	169	123.5	112.5	104.5	59	137	113	131.5	141.5	121.5	113	136.5	141	129.5	103.5	114	117.5	137.5	95.5	97	119.5
AT1G19360	82.5	126	75	84	98	78	98.5	83.5	91	141.5	155.5	133.5	72	77	109.5	83.5	93	75	98.5	129.5	92	123.5	154	74	122.5	97.5	179	140.5
AT1G19370	36	10.5	36.5	21	32	16	21.5	42.5	13	30	10	26	24.5	29	29	26	27	36	26.5	35	32	23.5	38.5	55	27.5	35	23.5	38
AT1G19380	9.5	13.5	6.5	4.5	5	2.5	3.5	12.5	4.5	0	3	0	6	7	9.5	3.5	10.5	5.5	10	2.5	8	5.5	1	0	0	0	18	9.5
AT1G19400	59.5	35.5	82	80	82.5	105.5	98.5	65.5	44.5	65.5	66.5	71.5	67.5	51	46	59	76	61.5	55	79	70.5	102.5	114	61	61	69.5	48	83
AT1G19430	58	82	92	70.5	77	89	76.5	62	74	61.5	82.5	35	78.5	67.5	76.5	73.5	70.5	71.5	72.5	70.5	65.5	104	26.5	61	76	81	82.5	48.5
AT1G19440	106	84.5	94	77.5	68.5	67.5	83	79.5	85.5	155	101.5	21.5	106.5	90.5	115	86.5	105	93	97	79	82	87	63.5	83	76	87	62.5	95
AT1G19450	512	403	327	194	194.5	156	204	209	217	246.5	368	263.5	231.5	196.5	211.5	245	332	192	321.5	225	180	223.5	393	292	337	403	447.5	497.5
AT1G19480	34.5	22.5	34	31	10.5	37	18	46.5	25.5	13	61.5	6	34.5	24.5	29	41.5	14	27	19	28.5	25	27	38.5	23.5	37	23	32	19.5
AT1G19485	98.5	89	115.5	79	82.5	72.5	69.5	58	90	84	135	84.5	73.5	92	95	78	76	85.5	88	72.5	83.5	68.5	101.5	67.5	41.5	87	111	100.5
AT1G19490	21.5	8.5	20	21.5	33	32	27.5	32.5	18	23.5	43.5	43	16.5	16.5	14	17	23.5	13.5	24.5	19	18	23.5	38.5	6	9.5	21.5	8	30
AT1G19520	64	91	87	115	96.5	107	102.5	81.5	110	84	85.5	111	98.5	106	126.5	86	101.5	102	100.5	107	108.5	84.5	141.5	133.5	154	94	79.5	78
AT1G19530	6.5	17	17.5	25.5	21.5	29	14	12.5	21.5	13	12.5	6	11.5	11	12.5	17	15	16	18	32	28.5	27.5	15.5	33.5	0	14	3	17
AT1G19540	3.5	17	4.5	10.5	13.5	7	14.5	15	15.5	0	28	6	22.5	19.5	17	15.5	15	20	11.5	22.5	19.5	19.5	15.5	8	18	3.5	10.5	12
AT1G19565	0	0	0	7	3.5	6	1.5	2	5.5	0	5	6	0	1	1	1	3	2.5	2	3.5	1.5	2.5	1	0	0	3.5	5.5	0
AT1G19570	1821	1701	2021	2548	2760	3215.5	2711.5	2524.5	2760	2417.5	2488	2016	2862	2639.5	2294.5	2970	3053	2813	2684	3298.5	3869	3018.5	2524.5	2711.5	2684	2277.5	2227	2294.5
AT1G19580	111	91	104.5	85.5	99	128.5	106.5	132	130.5	51	85.5	84.5	105.5	113	110	131.5	118.5	111	108.5	112	103.5	121.5	76.5	99.5	122.5	116.5	120.5	106
AT1G19600	290.5	203	277	317	270.5	271.5	364.5	291.5	317	277	279.5	320	295	329	289.5	361.5	380.5	357	369	314	347	321.5	183	277	331.5	334	312.5	276
AT1G19650	19.5	24.5	11	23.5	25.5	9.5	25	23	26.5	10	20.5	21.5	22.5	17	22.5	17	25.5	17.5	17	21.5	17	21	38.5	25.5	0	10.5	13	17
AT1G19660	204	175.5	157	250.5	288	225.5	227.5	284	219.5	148	184.5	374	231.5	214	203.5	219.5	202.5	171.5	182.5	258	240.5	282	325	329	266.5	215.5	203.5	181.5
AT1G19680	79.5	94	65.5	89.5	80	60	90.5	65.5	78	76	38	71.5	66.5	111	81	58.5	62	75	66.5	83	76.5	76	101.5	85	61	82.5	45.5	76
AT1G19690	21.5	22.5	29	31	34	26.5	27.5	27	30	43.5	28	13.5	20.5	33	19	22.5	23.5	33	28	28	26.5	26	26.5	29	22.5	26	10.5	22.5
AT1G19700	180.5	265.5	217	147	184.5	135	153	228.5	157.5	211.5	193	191.5	177.5	193.5	182	184	145	169	193.5	174	165	150.5	183	170.5	154	189	197.5	205.5
AT1G19710	59.5	35.5	92	55.5	59.5	59	54	50.5	64.5	40.5	88	62.5	58	69.5	68.5	62.5	81.5	74	73.5	61.5	63.5	58.5	89	76.5	37	66.5	68.5	91.5
AT1G19715	120.5	124	147.5	134	166.5	202	180	154	182	201.5	141.5	151	156.5	153.5	148	174.5	192.5	137.5	150.5	152	212.5	162	89	147.5	41.5	131.5	175.5	131.5
AT1G19720	15	13.5	11	15	18.5	25	10	31	18	30	12.5	10	8	18.5	10	6	19	14.5	15.5	33	29	35.5	15.5	27.5	0	12.5	21	27
AT1G19730	42.5	60.5	40.5	35.5	18.5	46.5	32	36.5	19	58	43.5	26	30	27	39	35.5	25.5	38.5	35.5	15	36.5	27	101.5	47.5	22.5	35	45.5	38
AT1G19740	13.5	24.5	34	42.5	36	23.5	53	32.5	54	68.5	31	21.5	40.5	51.5	36	47	27	27.5	34.5	38	33	27	26.5	49	32	26	37	24.5
AT1G19750	8	4.5	6.5	7	8	9.5	15.5	11	6.5	26.5	3	10	15	8	6	8	15	7	12.5	3.5	4.5	3.5	1	4.5	0	17	5.5	27
AT1G19770	88.5	65.5	59	42.5	52	52	59	60	79.5	72.5	51.5	133.5	55	78	66.5	67.5	107	57.5	59.5	69.5	72	57	76.5	63	41.5	74.5	68.5	91.5
AT1G19790	2.5	10.5	0	2.5	7	3.5	4	7	2	0	3	0	1.5	8	6	6	4.5	9	6	2	7	3	1	15.5	5.5	5	5.5	7
AT1G19800	55	54	52	69.5	62.5	64	58	81.5	66.5	80	112	50.5	49	59.5	62	71.5	53.5	75	63.5	68.5	82	77.5	51	51	66	69.5	48	67.5
AT1G19835	300	243	337	304	374	362.5	304	275	329	186	349.5	309	222.5	317	288.5	287	259.5	286.5	285.5	345	384	368.5	339	282	302	330.5	359	310.5
AT1G19840	21.5	52	20	25.5	20	16	12.5	9	24.5	16	25.5	0	27.5	12.5	17	29	10.5	16	9	19	18	23.5	38.5	19.5	18	17	10.5	19.5
AT1G19850	55	40.5	118.5	84	104.5	128.5	99	69.5	115	116.5	51.5	55	72	81	84	83	87	80.5	80.5	96	121	89.5	38.5	93.5	159	94	106	80.5
AT1G19860	54	65.5	47.5	61	70.5	42.5	47	65.5	63.5	43.5	56	59	44.5	42.5	66.5	62.5	52	73	61.5	62	58	45.5	38.5	49	46.5	36.5	65.5	35
AT1G19870	406	443	370.5	423	438.5	484	396.5	434.5	396	358.5	504	341.5	345	342.5	380.5	390	411	402.5	400.5	426	408.5	481.5	428	346	710	424	370.5	497
AT1G19880	197	189	217	213.5	210.5	154	203	203.5	222	190.5	229.5	119.5	167.5	226	187.5	178	196	224	183	201.5	185.5	214.5	168.5	214.5	148.5	201.5	163	159
AT1G19900	37.5	33.5	6.5	0	2.5	0	5.5	5.5	5.5	7	7	38.5	15	11.5	22.5	14.5	6	5	11	12.5	4.5	5.5	51	4.5	0	12.5	10.5	22.5
AT1G19910	685	701.5	668.5	609	650.5	509	659	726	568.5	577.5	808.5	509	907.5	703	701.5	794	678.5	720	773.5	666	604	636.5	696.5	536	515.5	628	614.5	624.5
AT1G19920	177	205	167.5	235.5	249	265.5	165	136	225	226	187	225	181	165.5	194	178	236.5	232.5	209	213.5	257	272.5	128.5	263.5	256	197	223.5	242
AT1G19940	6.5	4.5	4.5	3.5	2.5	7	2.5	12.5	4.5	0	0	0	3.5	3	3.5	4.5	3	1	9.5	2.5	2	1.5	1	9.5	0	5	10.5	7
AT1G19950	22.5	29	11	19	20	22.5	30	9	21.5	19.5	17.5	10	19	25	32	18	9	27.5	19	26	25.5	16	1	11.5	13.5	23	15.5	12.5
AT1G19960	58	96	77	17	10.5	7	84.5	54.5	50	43.5	43.5	38.5	26	37	24.5	41.5	22.5	40.5	40.5	31	22.5	34.5	101.5	93.5	71.5	128.5	85.5	91.5
AT1G19968	1	0	0	1	1	2.5	4	2	1	0	0	0	0	0	1	0	0	4.5	0	1.5	4.5	1.5	1	0	0	1	0	0
AT1G19970	15	24.5	13.5	38	35	30.5	36	44.5	24.5	43.5	15	35	30	23.5	25	20	17	28.5	24.5	19	27	32	15.5	39.5	41.5	20	18	51
AT1G19980	21.5	24.5	22.5	20.5	17	10.5	8	7	20	26.5	17.5	6	10.5	14.5	18.5	17	20.5	12.5	11.5	11.5	17	9	51	19.5	18	15.5	10.5	30
AT1G19990	10.5	24.5	13.5	25.5	23.5	30.5	14.5	12.5	21.5	23.5	20.5	47	31	25.5	31	41.5	17	26.5	23.5	19.5	23.5	31	63.5	55	5.5	32	40	33
AT1G20010	225.5	209	268	207	208	217.5	314	301	270.5	287.5	317	212.5	327.5	281	253	319.5	323	291.5	297	295.5	278.5	290.5	141.5	335.5	219.5	294	296.5	220.5
AT1G20020	18	17	13.5	7	6	13.5	13.5	9	11.5	13	5	35	11.5	6	11.5	14.5	32	14.5	16	20	34.5	21	1	13.5	46.5	15.5	40	12.5
AT1G20030	15	6	11	22.5	19	4.5	20.5	12.5	10.5	10	20.5	13.5	13.5	11.5	11.5	13.5	17	15	9.5	10.5	13	9	15.5	11.5	32	18	13	14.5
AT1G20050	215.5	193.5	295	259	272	233	246	284	228.5	233.5	214.5	234	297	251	275	300	267.5	330.5	294	287	291	267.5	339	221.5	287	255	287	217.5
AT1G20060	24.5	26.5	20	30	33	23.5	43.5	23	40.5	30	25.5	43	24.5	36	35.5	18	32	31	30	33	35	28.5	38.5	32	32	29	37	45.5
AT1G20065	0	2.5	2.5	4.5	0	1	4	7	1	0	0	6	0	0	1	1	4.5	2	2	1	1	3	1	0	9.5	0	0	0
AT1G20090	211.5	189	180	187	185	212	162.5	185	183	191.5	209.5	204	139	179	185.5	164	190.5	199	189.5	176	174	169.5	63.5	161.5	244	203.5	200.5	249
AT1G20100	207.5	166.5	223.5	260	252	269.5	163.5	194.5	210	206	155.5	225	175	164	181	205	210	248.5	213.5	199.5	186	239.5	295.5	180	231	210	185.5	263
AT1G20110	369	279.5	254	273	280	240	299.5	301	265.5	304	257	239.5	312.5	277	312	292	257	288.5	286	301.5	249	273	168.5	326	251	255	307	292.5
AT1G20140	34.5	44.5	47.5	29	34	34.5	55	40.5	32	37	20.5	13.5	64	30	50.5	36.5	35	36	22.5	25.5	43.5	33	76.5	11.5	37	14	26	14.5
AT1G20160	239.5	227.5	273.5	557.5	474.5	483	462	500.5	453	386	452.5	509.5	225	246.5	246	255	261.5	210	225	499.5	515.5	455	411.5	438	467.5	274	277	400.5
AT1G20190	55	65.5	68.5	78	62.5	76.5	63.5	100	84.5	109	61.5	35	60	58	57	64	110.5	63.5	75	86.5	82	79	183.5	95	86	61	108.5	91.5
AT1G20200	243	279.5	262	287.5	247	308.5	308.5	258.5	279.5	247	283	230	239	291	294.5	311.5	265.5	244.5	249	302	303.5	243	517.5	261.5	225.5	258	217	279
AT1G20220	112.5	140	118.5	169.5	182.5	158	229.5	145	143.5	182.5	141.5	97.5	202.5	204	205	180.5	175	240	168.5	165.5	152.5	172.5	89	131.5	184	154	175.5	151
AT1G20225	170.5	172.5	126	116.5	98	110	159.5	145	134	76	146	76	187	168.5	176	182.5	162	179	156	126	128.5	126	101.5	109.5	96.5	115	173	168.5
AT1G20230	3.5	0	0	1	2.5	2.5	3.5	2	1	0	0	0	3.5	3	2.5	5	3	1	5	3.5	5	2.5	1	8	5.5	15.5	0	0
AT1G20260	636.5	532.5	567	655.5	601.5	591.5	566.5	659	638	690.5	603.5	693.5	639.5	640.5	677.5	714	706.5	623.5	650.5	726	672.5	629.5	808.5	844.5	690.5	755.5	754.5	805.5
AT1G20270	29	38	29	32.5	38	30.5	44.5	21	30	94.5	38.5	50.5	39.5	37	37	29	37	28	41.5	27.5	31.5	30	38.5	21.5	18	24.5	5.5	24.5
AT1G20300	16.5	8.5	22.5	21	13.5	17	18.5	29	25.5	23.5	10	21.5	29	21	24.5	15.5	30	24.5	19	19.5	24.5	21	1	23.5	18	27.5	21	9.5
AT1G20330	433	465.5	348.5	301	343.5	324.5	386	315	336	247	455.5	387	334	374	378.5	350.5	332.5	340.5	350.5	342	329.5	328.5	358	320.5	454	424	404	442.5
AT1G20340	57	38	34	48	48.5	46.5	62.5	56	74	37	43.5	93	64	55	38.5	48	55	34	29	69.5	73.5	78	1	59	122.5	50	73.5	45.5
AT1G20370	37.5	67.5	27	45	42.5	50.5	67.5	25	59	43.5	54	39	49	41.5	50.5	43.5	50	62	34.5	49	43.5	50.5	76.5	55	61	46.5	45.5	24.5
AT1G20380	125	137.5	97	133.5	86	102	76	100	97	76	155.5	115	71.5	105	100	93	63.5	90	106.5	83	89.5	78	63.5	103	128.5	121.5	129.5	108
AT1G20410	50.5	22.5	36.5	55.5	64.5	37	37.5	42.5	50	13	40.5	50.5	52.5	49	66.5	54	52	56	44.5	44.5	55	45	128.5	51	61	50	56.5	48.5
AT1G20430	71.5	45	65.5	84.5	93	100.5	57	50.5	97	68.5	74	35	86.5	70.5	63.5	90	68.5	104	87	83.5	79.5	96.5	26.5	59	66	89	111	91.5
AT1G20440	2780.5	2813	2760	4343	4978.5	4549.5	4343	3880	4209	3880	4104.5	4549.5	3215.5	2488	2606.5	2227	2367	2016	2515.5	4343	3880	5580.5	3215.5	3088	4343	2733.5	2780.5	2970
AT1G20450	1554	1463.5	1613	3436.5	3880	4209	3053	2839	2813	1856	2684	2606.5	2277.5	1744	1675.5	1525	1709.5	1427	1666.5	2780.5	2524.5	3765	1647.5	2132.5	2277.5	1675.5	1880.5	1634
AT1G20460	10.5	6	11	27	43.5	38.5	28	32.5	43	19.5	15	13.5	24.5	14.5	22.5	23.5	22.5	23.5	23.5	24.5	18.5	22.5	63.5	65	41.5	27.5	45.5	5
AT1G20480	40.5	19.5	36.5	28.5	34.5	36	52.5	27	32	30	31	35	26.5	37	36.5	28	14	33	38	30	30	32	63.5	25.5	9.5	39.5	13	67.5
AT1G20490	32	60.5	38.5	74.5	44.5	36	49.5	46.5	44.5	37	51.5	59	44.5	44.5	45.5	57	38.5	52.5	54	46.5	62.5	46.5	51	61	46.5	51.5	45.5	27
AT1G20510	97.5	67.5	52	72	69.5	72.5	72.5	69.5	91	54.5	77	21.5	62.5	87.5	100	90	101.5	80.5	82.5	70.5	79.5	76.5	51	63.5	128.5	79	77	78
AT1G20540	61.5	47	54.5	51	45	63	47	56	56	159	25.5	35	45.5	28	43	68.5	34	61.5	49.5	47.5	50	61	38.5	37.5	13.5	58	40	61.5
AT1G20550	13.5	22.5	24.5	23.5	22.5	36	28	19	30	19.5	23	6	15.5	24.5	23.5	13	34	15	18	19	25	23.5	38.5	25.5	61	23	13	24.5
AT1G20560	147.5	200	138.5	160	131	170	137	152	130.5	141.5	179	142.5	144	182	161	134.5	176	122.5	161	156	169.5	166.5	378.5	129.5	137.5	159	200.5	194.5
AT1G20570	13.5	15	15.5	5.5	11.5	10.5	10	2	9	10	12.5	0	10.5	12.5	7	9	6	8	5.5	7	7	10.5	1	9.5	0	3.5	5.5	12.5
AT1G20575	62.5	67.5	52	82	58	61.5	49	48.5	83.5	101.5	80	71.5	82.5	72	69.5	80	76	80.5	81	75	79.5	66.5	38.5	83	71.5	72.5	85.5	108
AT1G20580	130.5	145	138.5	154	147.5	141	164	102	141.5	105.5	182	200	192.5	178	170	168.5	141.5	183.5	189	151.5	124.5	146	101.5	127	164	132.5	79.5	122.5
AT1G20610	27	26.5	17.5	44.5	49.5	38.5	30	52.5	47.5	34	31	39	33	36.5	28	32	41.5	37	28	27	36	45	51	33.5	37	55	26	22.5
AT1G20620	1673	1360	1566.5	1369	1377.5	1788	1856	1478.5	1744	1405.5	1375	1187.5	1537.5	1723	1385	1963	1871	1647.5	1547.5	2132.5	2403.5	2197.5	1793	1793	1744	1793	1537.5	1566.5
AT1G20630	61.5	45	87	114	86	70.5	113	60	69	47.5	91	138.5	98.5	92	85	75	70.5	55	49	128.5	94	94	101.5	83	56	71.5	65.5	54
AT1G20640	154	116.5	121	113	90	86	137	130.5	121.5	76	169.5	146.5	100.5	129.5	146	100.5	78	115.5	130.5	102	109	116	154	129.5	169.5	141.5	126	154
AT1G20650	43.5	40.5	45.5	36	45	37	41.5	34.5	50	58	23.5	43	39.5	33	30	32	48.5	40.5	34.5	49	40.5	39.5	51	69.5	51.5	27.5	54	61.5
AT1G20670	50.5	84.5	47.5	53	47.5	56	83	54.5	60.5	47.5	82.5	84.5	54.5	65.5	58	56	53.5	53	62.5	52	58	68.5	1	85	66	46.5	45.5	88.5
AT1G20693	777.5	759	788.5	384	454	354	540.5	567	563.5	544	693	909	929	788.5	809.5	866.5	988	862.5	897	618.5	571	647.5	974.5	698.5	865	837	693	964.5
AT1G20696	487	572	436	335	393	337	465.5	396.5	383.5	421.5	438.5	418.5	588.5	465.5	455	560.5	519.5	567	524.5	407	373.5	418.5	310	510	510	600	550	529.5
AT1G20700	15	29	2.5	12.5	5.5	13.5	23.5	19	11.5	10	7	0	25.5	17	15	19.5	9	20.5	17	11.5	15	9	15.5	17.5	27.5	23	45.5	40.5
AT1G20720	22.5	40.5	8.5	27	23.5	21.5	17	29	18	7	15	6	16	21.5	22.5	19	19	36	27.5	20	17	22.5	76.5	15.5	41.5	20	34.5	56
AT1G20760	186.5	191.5	208	229.5	187.5	181	228.5	248.5	207.5	198	196	182.5	179	228.5	217.5	170.5	160	196	210.5	229.5	239	193	283	221.5	261	229.5	200.5	249
AT1G20770	61.5	91.5	63.5	84.5	98.5	102	116.5	77.5	92.5	23.5	77	102	100.5	72	89.5	78.5	85	86.5	92.5	102	87.5	109	89	78.5	128.5	79	91	64
AT1G20780	85.5	74.5	63.5	63.5	64.5	75	89	54.5	59	34	101.5	84.5	55	89.5	79	100.5	62	55.5	56	69.5	57	54	51	51	71.5	58	79.5	38
AT1G20810	25.5	10.5	34	12.5	15	8	21.5	3.5	22.5	0	20.5	6	18.5	12.5	10.5	21.5	12.5	17.5	10	12.5	26.5	11.5	1	11.5	22.5	9.5	21	22.5
AT1G20816	6.5	10.5	11	7.5	10.5	10.5	5.5	9	18	0	20.5	6	13.5	9.5	13.5	13.5	15	14	8	18	19.5	11.5	1	15.5	9.5	9.5	5.5	17
AT1G20823	109	137.5	203	72	78	127	124	130.5	139.5	58	93	128.5	185	119.5	109	165.5	116.5	119.5	114	76.5	113	69.5	154	95	91	82.5	138	111
AT1G20830	19.5	15	34	19.5	28	18.5	35	5.5	22.5	16	40.5	47	31	18.5	31	22.5	23.5	23.5	29	30.5	23.5	28.5	51	35.5	9.5	32	21	14.5
AT1G20840	247.5	227.5	180	187	181	161	240	218.5	201.5	179	203	263.5	233	257.5	283	318.5	307.5	251	279.5	205	199.5	175	241.5	142.5	237.5	213.5	238.5	189.5
AT1G20850	292	297.5	305.5	298	332.5	287	288	284.5	368	383.5	311.5	182.5	349.5	272	229	288.5	336	205	225	300.5	318	339.5	411.5	376	296.5	308.5	335.5	314
AT1G20870	1	0	2.5	0	5	3.5	2.5	0	11.5	19.5	0	0	3.5	2	1	2	1.5	2	0	0	2	3	1	2.5	0	1	0	2.5
AT1G20880	61.5	49.5	65.5	57	45	60	47	60	51.5	58	85.5	43	42.5	48.5	47	40	52	43.5	62	43.5	37.5	51.5	101.5	41.5	41.5	64.5	65.5	64
AT1G20890	25.5	24.5	8.5	40.5	31	48	17	16.5	20	40.5	25.5	39	32	16.5	29	23.5	38.5	23.5	26.5	27	22	32	1	25.5	37	32	21	35
AT1G20900	72.5	67.5	61.5	83	98	111	111.5	67.5	59	65.5	54	50.5	70.5	71.5	52.5	49	50	51	62.5	61	64.5	87	15.5	65.5	71.5	58	77	56
AT1G20910	39.5	45	54.5	53	37	57	39.5	31	40.5	51	49	35	43.5	55	41.5	41.5	38.5	35	45	35	35	42.5	15.5	19.5	51.5	36.5	42.5	48.5
AT1G20920	189	180	220.5	134	132.5	156.5	133.5	94	116.5	105.5	187	138.5	103.5	165	158.5	113	146.5	171.5	174	147.5	142.5	145	114	184.5	189	193.5	209	184.5
AT1G20930	29	29	32	55.5	62.5	69.5	55	44.5	62.5	26.5	36	55	56	50	54	54	47	40.5	44.5	48	35	45	63.5	45.5	37	53.5	32	48.5
AT1G20950	495.5	403	563.5	517.5	497.5	491.5	454	496	498.5	480.5	543	542.5	411	483	505.5	446.5	487	463	483	509	515.5	425	715.5	339	572	533.5	590.5	477
AT1G20960	546.5	545.5	609	610	565	645.5	560	586	566.5	525.5	574	532.5	350.5	533.5	517.5	400.5	408.5	456	472.5	533.5	581	587	717	592	542.5	640	718	529.5
AT1G20970	243	224.5	289	305	288.5	279.5	284.5	278.5	275	242.5	279.5	212.5	175	275	239	220.5	278	198	225	311	277	318	256	294	219.5	321.5	322.5	244
AT1G20980	282	279.5	265.5	276	263	274	246	269.5	255	284	161.5	200	132.5	227	253	185	207	206.5	239.5	280.5	247	271	226	309.5	238	303	277	244
AT1G20990	9.5	17	13.5	10.5	18.5	29	15.5	11	8	34	10	0	17.5	16	14	7.5	30	11.5	8.5	23.5	26.5	14	1	23.5	0	24.5	15.5	9.5
AT1G21000	150	110.5	146	115.5	113	108	155	124	117.5	90.5	162	182.5	91	136.5	139.5	115	99.5	104	88	92	75	119.5	77	152.5	122.5	112	163	128.5
AT1G21010	82.5	94	82	74.5	64	49.5	72	62	50	13	51.5	76	65	61.5	56	42.5	54	37.5	41.5	40.5	50.5	41.5	101.5	59	86	45.5	56.5	33
AT1G21050	141	113	131.5	86.5	91.5	75	151	140.5	130.5	145	132	128.5	156.5	128.5	117.5	155	134.5	136	133.5	119.5	83	93.5	77	109.5	66	96	74	128.5
AT1G21060	18	6	2.5	5.5	12.5	12.5	3.5	3.5	10.5	23.5	12.5	0	4.5	6	13.5	7.5	12.5	10.5	6	11	11.5	9	1	9.5	32	10.5	26	24.5
AT1G21065	57	47	45.5	71.5	62.5	82	61	60	69	58	106.5	66.5	97	52.5	71.5	75	58.5	65.5	59	55	55	61.5	128.5	43.5	76	59.5	74	64
AT1G21070	13.5	29	32	23.5	17.5	23.5	14.5	27	26.5	7	15	0	15.5	14.5	14	20	14	17	19.5	13.5	26.5	17	15.5	19.5	0	18	26	40.5
AT1G21080	125	164	182	166.5	190	170	175	167	153.5	130.5	175	191.5	196	162.5	164	154	123.5	147	155	182	167	183.5	101.5	159	213.5	147	135	114
AT1G21090	44.5	24.5	38.5	39	40.5	60	49.5	25	25.5	16	15	0	49	33	42.5	46	35	74	49	50.5	47.5	33	15.5	29	46.5	38	32	45.5
AT1G21100	201.5	166.5	138.5	95	118.5	49.5	111.5	220.5	125	234	146	179	152	138.5	166.5	288.5	192.5	166.5	201.5	101	94	89	114	119.5	66	145	217	211.5
AT1G21110	296	301	134	95	90	68.5	72.5	203.5	81	202	190	160.5	221.5	208	214.5	293	152	163.5	234.5	109	106.5	115	89	95	51.5	243	211	259
AT1G21120	43.5	36	34	34	34.5	17	8	27	11.5	101.5	12.5	13.5	10.5	10.5	21.5	15.5	4.5	17	17	23.5	20	29	15.5	13.5	9.5	32	18	24.5
AT1G21130	64	40.5	32	31	32	8	6	32.5	25.5	7	7	18	2	6	7	13	4.5	23.5	31	28.5	26.5	36	128.5	32	32	35	26	45.5
AT1G21140	21.5	19.5	27	79	49.5	23.5	111	65.5	54	87	66.5	76	47.5	53.5	74.5	71.5	81.5	50.5	47.5	34	26.5	45.5	63.5	47.5	56	36.5	37	51
AT1G21150	6.5	4.5	2.5	2.5	5.5	8	7	3.5	2	0	3	18	6	5.5	10.5	12.5	3	15	4.5	8	5.5	5.5	15.5	4.5	0	2.5	3	14.5
AT1G21160	74.5	91.5	52	106.5	77	98	69.5	81.5	70.5	94.5	54	138.5	54.5	88.5	90	64.5	85	68.5	83.5	79.5	58.5	113	26.5	99.5	118	72.5	106	83
AT1G21170	104.5	119.5	111	112	133.5	126	109	92	94	94.5	120.5	142.5	91	105.5	116.5	112	96	115.5	112.5	120.5	136	114	89	97	143.5	159	82.5	95
AT1G21190	49	54	52	66.5	81.5	72.5	78	96	75	40.5	56	66.5	99	58	72.5	73.5	70.5	82	62.5	63.5	58.5	76	26.5	74	56	50	68.5	56
AT1G21200	37.5	42.5	36.5	40.5	34.5	32	19.5	21	20	76	54	50.5	36	31	43	38.5	47	31	35	30	31.5	28.5	38.5	47.5	41.5	26	45.5	48.5
AT1G21210	5	8.5	0	2.5	2	1	0	3.5	0	13	3	0	8	8	9.5	4.5	9	5.5	4.5	2.5	4.5	7.5	1	0	9.5	3.5	0	14.5
AT1G21270	1	2.5	0	0	0	0	0	0	0	0	5	0	1	1	1	0	9	2.5	1	0	0	3	1	4.5	5.5	1	3	2.5
AT1G21310	2548	2407	1912.5	1821	1665.5	1264	1181.5	2417.5	1537.5	2407	1613	2068.5	1744	2684	2970	2488	1856	1570	1955.5	2970	1738	1314.5	2639.5	1511.5	1365	2174.5	1955.5	2197.5
AT1G21340	1	4.5	4.5	0	1	3.5	6	2	5.5	0	3	0	0	1	0	3.5	1.5	0	1	1	1	1	1	0	0	1	0	0
AT1G21350	12.5	2.5	17.5	18	20	18.5	12.5	9	14	10	17.5	21.5	16	13.5	15	20.5	9	16	19.5	15	19.5	9	26.5	4.5	18	18	3	2.5
AT1G21360	3.5	29	4.5	5	2	6	4	9	11.5	10	5	21.5	25.5	12.5	14	9.5	4.5	5	9	6	5	4.5	15.5	2.5	5.5	2.5	0	5
AT1G21370	57	49.5	90	79	67.5	63	56	96	63.5	76	51.5	35	65.5	63.5	52.5	64	54	52.5	52.5	67.5	68.5	82.5	51	76.5	91	72.5	88	103
AT1G21380	300	254	185.5	205	253	243	273	248.5	243	202	200.5	314	288	267	277	309.5	243.5	231	254.5	261	228.5	238.5	168.5	205.5	203.5	274	250.5	235.5
AT1G21390	32	54	38.5	37	29	28	37.5	32.5	18	13	31	13.5	50.5	50	43	41.5	43.5	34	26.5	32	31	38	38.5	32	9.5	23	29	22.5
AT1G21400	5	0	11	7.5	12.5	12.5	12.5	7	5.5	0	0	6	5.5	3	3	0	9	0	4.5	11.5	9.5	14	1	2.5	9.5	2.5	10.5	7
AT1G21410	44.5	31	27	51	39.5	41.5	37.5	31	36.5	80	36	18	27	39.5	33	21.5	19	36	30	56	48.5	52	1	23.5	37	31	40	22.5
AT1G21440	309.5	305	321.5	230	235.5	254	391	400	369	349.5	364.5	273	417.5	442.5	378	450	374	418.5	399.5	267.5	282	269.5	183.5	367	427.5	368.5	363.5	371
AT1G21450	252	220.5	243	197	165	181.5	167.5	182.5	184.5	191.5	243	249	206	160	213.5	209.5	166.5	183.5	197	201.5	168.5	181	128.5	127	203.5	192.5	238.5	242
AT1G21460	1	0	4.5	5.5	5	4.5	0	0	0	0	10	0	6	2	1	2	4.5	2	1	0	2.5	2.5	1	2.5	0	1	0	0
AT1G21480	48	47	43.5	45	41.5	53	69.5	36.5	62.5	58	61.5	13.5	48.5	68.5	53	56.5	43.5	58.5	43	43.5	53.5	40.5	38.5	32	13.5	46.5	74	17
AT1G21500	1	4.5	0	1	1	1	0	5.5	2	7	0	10	2	1	0	0	0	3.5	1	2.5	0	7.5	1	6	0	3.5	3	5
AT1G21510	3.5	0	0	1	1.5	0	1.5	2	0	0	3	13.5	0	0	3	2	7	0	2.5	3.5	1	0	1	2.5	0	6.5	13	2.5
AT1G21520	5	0	4.5	4.5	5	9.5	1.5	2	1	0	0	6	10.5	3	5.5	3.5	6	5.5	8.5	5	5	0	1	4.5	9.5	1	5.5	9.5
AT1G21550	9.5	10.5	2.5	1	2	1	1.5	7	2	0	3	0	1	0	1	1.5	4.5	2	2.5	3.5	4.5	0	1	2.5	5.5	1	5.5	12.5
AT1G21560	18	31	36.5	30.5	49.5	57	28	32.5	44.5	13	25.5	80.5	34	40.5	31	32	45	43.5	40.5	39	31	47	63.5	65.5	66	59.5	45.5	27
AT1G21580	266.5	336	251	280.5	234.5	274	238.5	226.5	218.5	243	190	215.5	169.5	244.5	239	165.5	175	201.5	263.5	240	261.5	247.5	378.5	214.5	208	311	189	244.5
AT1G21590	154	116.5	138.5	147	137.5	122.5	111.5	134	138	130.5	115	183	85	76	95	95	107	97	108.5	127	122.5	160.5	114	165.5	122.5	115	141.5	114
AT1G21600	22.5	15	2.5	17	20	26.5	37.5	7	36.5	40.5	20.5	26	30	28	23.5	15	27	27.5	20	27.5	27	28.5	51	23.5	5.5	15.5	13	14.5
AT1G21610	72.5	96	87	95	116.5	115.5	126	128.5	105	130.5	93	66.5	102.5	110	97	113	121.5	101	91.5	96	96.5	78	101.5	95	86	81	74	111
AT1G21630	423.5	374	414	378.5	365.5	370.5	434	428	337.5	485	364.5	360.5	267.5	405.5	387.5	307.5	331	303	386	422	441	355.5	241.5	396.5	354.5	350	392.5	378.5
AT1G21640	125.5	132.5	124	118.5	125	152	132.5	110	143.5	47.5	80	102	91	130.5	128.5	115	80	75	104.5	119.5	132.5	141	168.5	105	118	92	108.5	128.5
AT1G21650	29	13.5	13.5	42.5	34	61.5	30	31	44.5	10	31	30.5	9.5	30.5	26	13.5	29	24.5	23.5	25.5	25.5	34	26.5	29	41.5	32	26	35
AT1G21660	284.5	279.5	283	226	226	243	189	253	264.5	284.5	305.5	267.5	214.5	217.5	216.5	207	229.5	216.5	211.5	258	217	233.5	241.5	251	256	288.5	307.5	192
AT1G21670	32	56	38.5	52.5	66.5	55	47	74	34.5	47.5	46	62.5	43.5	38	47.5	45	19	34	23.5	41.5	32	36	51	27.5	27.5	27.5	59.5	19.5
AT1G21680	182	130.5	136.5	177	153	142.5	199.5	213	157.5	243	91	106.5	131.5	151	158.5	149	118.5	99.5	124.5	141.5	85.5	155	128.5	135	118	110	77	126
AT1G21690	46.5	31	63.5	64	47.5	61.5	74.5	56	44.5	40.5	38.5	35	58	58	66.5	62	35	55.5	55	51	62	45	101.5	53	22.5	58	40	43.5
AT1G21695	6.5	4.5	0	0	2.5	1	0	0	2	0	0	6	3.5	4.5	4.5	3.5	10.5	2.5	6	1.5	0	1.5	1	8	13.5	2.5	3	0
AT1G21700	115.5	103.5	90	103	91.5	113	102.5	115.5	103.5	43.5	126	200	73	108	127.5	131	108.5	128.5	106.5	110	114	97.5	77	103	133.5	106.5	82.5	70.5
AT1G21710	36	49.5	49.5	35.5	48	36	41.5	38.5	33	30	25.5	59	44.5	50	51.5	47	34	42.5	51	40.5	50.5	38	38.5	33.5	32	48.5	21	24.5
AT1G21720	211.5	187	235.5	230	231	174	261	182.5	242.5	267.5	206	151	296	223	244.5	273.5	227	231	239.5	203.5	239	233.5	183.5	150.5	198	244	180.5	162
AT1G21730	68.5	116.5	115.5	105	76	102	85	100	83.5	54.5	129.5	123.5	69	112	95	96	130.5	98	97.5	98.5	99.5	82.5	15.5	93.5	86	106.5	116.5	119.5
AT1G21740	36	29	40.5	55.5	45	37	29	71.5	46	51	43.5	26	31	57	51.5	27.5	48.5	49	41.5	41.5	57	41.5	77	57	41.5	42.5	42.5	54
AT1G21750	907.5	725	833.5	1012.5	988	937	1007	998	1054	992.5	871	883	835	915.5	952	860	947.5	1009.5	938.5	921	979	857.5	730	837	827.5	1127	971.5	966
AT1G21760	59.5	60.5	77	42.5	57	37	59	46.5	55	90.5	56	84.5	70.5	46.5	72.5	86	57	59	65.5	59.5	76	60.5	89	63.5	76	48.5	91	88.5
AT1G21780	141	115	118.5	132.5	125	121	106.5	176.5	155	112.5	117.5	169.5	142	119.5	155.5	150.5	101.5	135	137.5	147	137.5	104	141.5	105	102	159.5	85.5	151
AT1G21790	19.5	13.5	32	28	37	38.5	40.5	27	30	51	10	6	24	26.5	25.5	25.5	29	25.5	33	32	33.5	36	15.5	8	66	24.5	13	24.5
AT1G21810	6.5	6	2.5	7	4.5	9.5	11.5	0	3	0	5	0	2.5	4.5	4	10.5	15.5	8	6	3.5	2.5	6	1	0	18	3.5	5.5	7
AT1G21830	6.5	10.5	24.5	12.5	15.5	17	17	19	16.5	13	5	0	19.5	23.5	12.5	15	14	15.5	21	19	16.5	16	15.5	9.5	18	23	26	12.5
AT1G21840	19.5	22.5	11	10.5	8	23.5	11.5	9	14	13	10	21.5	12.5	10.5	7	7	17	12.5	12.5	11.5	8	12.5	1	11.5	13.5	6.5	8	9.5
AT1G21880	57	47	29	29	28	55	61	48.5	36.5	40.5	49	39	60	47.5	33	49	34	63.5	46	33	54	16	27	61	9.5	26	26	48.5
AT1G21890	5	2.5	15.5	2	4.5	1	5.5	5.5	2	7	12.5	0	0	8	1	2.5	3	0	0	6	0	1.5	38.5	4.5	0	14	5.5	0
AT1G21900	96	106	146	109	131	94	97	142.5	94	94.5	77	146.5	96	83	99.5	111	129.5	85	89.5	99.5	92	132	209.5	137.5	76	81	100	103
AT1G21910	3.5	17	2.5	8	2	10.5	12.5	15	14	16	3	0	2.5	6	10.5	4.5	3	6.5	6.5	12.5	8	8	15.5	8	0	5	8	5
AT1G21920	287	279.5	292	262.5	283.5	225.5	209	324	230	334	217	243	209.5	261	295.5	216.5	267.5	231	253	282	259	383.5	269.5	259	174.5	233	267.5	242
AT1G21930	25.5	49.5	29	37.5	34.5	23.5	47	34.5	44.5	19.5	31	10	54	43.5	22.5	40.5	40	48.5	39	40.5	40.5	35.5	38.5	32	66	53.5	29	54
AT1G21980	101.5	155	138.5	167.5	219.5	209	129.5	119.5	171.5	91	211.5	128.5	133.5	153.5	134	136	162	115	135	146.5	146.5	187	183.5	131.5	133.5	169.5	135	95
AT1G22020	103	91.5	87	73.5	96.5	76.5	90.5	67.5	64.5	43.5	61.5	55	67.5	103	79	66.5	80	90	71.5	66.5	79.5	69.5	77	117.5	113	82.5	77	83
AT1G22030	93	74.5	40.5	34	22.5	36	46.5	32.5	38	98.5	46	84.5	58.5	49	43.5	54	48.5	50	44	34	43.5	52	51	57	27.5	74.5	48	45.5
AT1G22040	57	38	59	58	46.5	65.5	48	38.5	43	76	49	50.5	53.5	57	55.5	45	41.5	45.5	41.5	47.5	48.5	54	63.5	61	5.5	42.5	32	59
AT1G22050	12.5	8.5	11	17	8	12.5	6	0	3	19.5	12.5	10	15	9.5	10.5	11.5	10.5	7	6.5	9.5	11.5	15.5	1	0	5.5	12.5	8	7
AT1G22060	175.5	111	180	159.5	158.5	177	125	180.5	133	155	184.5	200.5	93	163	126	114	165	146	165.5	153.5	194	178	197	180	226	233	280.5	184.5
AT1G22065	106	86.5	121	76	84	102	107	90	64.5	98.5	61.5	102	114	102	79	94	94	113	89	94	136	113	141.5	95	122.5	122	120.5	83
AT1G22070	125.5	143	72.5	85.5	81	63	81.5	98	85.5	76	126	106.5	113	106.5	89	129.5	137.5	115	134	72.5	95	101.5	89	97	97	112	159.5	159
AT1G22140	33.5	40.5	43.5	33	27	25	29	32.5	32	23.5	23.5	18	39.5	37	25	31	20.5	34.5	25	19	25	27.5	1	27.5	22.5	31	29	67.5
AT1G22150	8	26.5	4.5	8	5	12.5	10	16.5	14	0	7	0	20.5	14.5	12.5	17	15.5	7	12.5	6	4.5	4.5	1	2.5	5.5	3.5	3	2.5
AT1G22160	25.5	22.5	6.5	14	12.5	3.5	11.5	25	2	16	3	18	25.5	13.5	21	24.5	6	14	18	17	15	7.5	1	4.5	9.5	10.5	8	14.5
AT1G22170	72.5	82	63.5	61	82	59	55	88	63.5	101.5	46	93	81	43.5	67.5	74	62	76.5	84.5	54	56	62.5	27	69.5	102	79	138	76
AT1G22180	36	49.5	36.5	51	58.5	46.5	37.5	34.5	32	16	28	55	44.5	48.5	46	47	32	33	51	50.5	44.5	69.5	15.5	17.5	22.5	56	42.5	54
AT1G22190	127.5	116.5	118.5	113	119	119.5	150	119.5	123.5	91	91	128.5	137	114	99	94.5	68.5	92.5	91.5	115	134.5	121	51	99.5	76	77.5	82.5	97.5
AT1G22200	130.5	106	177	127.5	117	108.5	85.5	98	129.5	91	101.5	89	101.5	128.5	129.5	102	139.5	146	121.5	132.5	108.5	134.5	63.5	140	61	123.5	88	128.5
AT1G22220	34.5	58.5	49.5	19	17	16	26	27	29	43.5	33.5	18	38.5	30.5	29	33	37	28	36	26	37.5	18	1	19.5	32	27.5	26	43.5
AT1G22230	61.5	82	68.5	36	40.5	30.5	53	34.5	39.5	65.5	36	21.5	57	46.5	46	58.5	59	47	44	41.5	44.5	54.5	77	49	22.5	38	45.5	73
AT1G22260	0	2.5	0	0	1.5	2.5	0	2	4.5	10	3	0	0	4.5	3.5	2	1.5	1	1	2.5	1	1.5	1	0	5.5	0	3	2.5
AT1G22270	72.5	60.5	37	55.5	50	50.5	72	52.5	57.5	43.5	28	55	99.5	79	63.5	86.5	37	59.5	58	49	57	33	27	65.5	56	51.5	77	70.5
AT1G22275	3.5	0	0	2.5	2	7	2.5	5.5	3	0	0	0	0	3.5	1	2.5	3	2.5	2.5	3.5	0	1.5	27	6	5.5	2.5	15.5	5
AT1G22280	94.5	116.5	49.5	119.5	117	131	94	114	97	163	99	106.5	106	104.5	105	84	99.5	74	95	73	78	97.5	89	85	143.5	87	82.5	88.5
AT1G22290	6.5	0	0	5.5	7	8	5	7	6.5	10	3	18	2.5	5.5	6	2.5	7	6.5	6.5	4.5	6	9	1	0	0	8	3	7
AT1G22300	893	941.5	742.5	947	941.5	894	844.5	854	822	780.5	1016	1054	790	718	790	808.5	774	864	819.5	922.5	851.5	966	663	1012.5	866.5	963	1025.5	1066.5
AT1G22310	27	24.5	27	34	45.5	41.5	36	32.5	26.5	116.5	40.5	39	41.5	42.5	41.5	41.5	25.5	32	39.5	38	41.5	37	89	29	27.5	31	50.5	40.5
AT1G22330	25.5	33.5	63.5	20.5	18.5	12.5	10	19	19	23.5	46	22	14.5	29	38	25.5	25.5	25.5	34	25.5	19.5	18.5	51	35.5	27.5	50	23.5	22.5
AT1G22340	0	0	0	1	1.5	1	1.5	5.5	4.5	0	0	0	1.5	1	3	1.5	1.5	1	1	0.5	1.5	0	1	9.5	0	0	0	5
AT1G22360	123.5	143	143.5	221	169.5	174	190.5	152	116.5	109	182	106.5	140.5	144	161.5	149.5	148.5	105.5	129.5	150.5	146.5	141.5	27	131.5	102	145	153.5	144
AT1G22400	36	33.5	47.5	62.5	50	50.5	53	21	56	58	28	22	31	24.5	50.5	28	12.5	38.5	33	45.5	47	56	38.5	21.5	81	27.5	68.5	33
AT1G22403	1	4.5	4.5	15.5	10.5	14.5	11.5	19	15.5	0	17.5	10	11.5	3.5	10.5	16	10.5	10.5	10	16	18.5	7	1	19.5	0	14	23.5	5
AT1G22410	1575.5	1675.5	1570	1486.5	1518.5	1366.5	1485	1675.5	1451	1345.5	1391.5	1627	1218.5	1481.5	1284.5	1366.5	1288	1212	1346	1491	1498	1442.5	1463.5	1360	1420	1478.5	1452.5	1669
AT1G22430	55	56	52	46.5	51.5	79	31	42.5	61.5	51	51.5	55	41.5	47.5	38	49	43.5	41.5	55	49.5	54	53	38.5	71.5	41.5	29	59.5	64.5
AT1G22440	380.5	333	272	373	445	410	288.5	317	394	194.5	302	369.5	373	413	362.5	318.5	325.5	276	325.5	379.5	319.5	343.5	533.5	323	337	262.5	366.5	401
AT1G22450	400.5	427.5	536.5	488.5	409	449.5	416	388.5	488.5	526.5	368	572	483	354	444	447	435	509	432	474.5	447.5	382.5	339	408.5	543	454	329	343.5
AT1G22460	6.5	10.5	8.5	5	5	10.5	4	5.5	6.5	7	3	13.5	8	5.5	13.5	5.5	6	8	8.5	9	5.5	13.5	15.5	21.5	22.5	9.5	3	3
AT1G22470	13.5	2.5	22.5	22.5	27.5	28	5.5	29	26.5	7	7	13.5	12.5	16.5	14	18	22.5	19.5	21.5	19	11.5	15.5	38.5	13.5	32	18	13	22.5
AT1G22490	3.5	4.5	8.5	2	4.5	7	7	7	10.5	0	10	10	13.5	8	5.5	6	7	3.5	7	7	5	7	1	8	5.5	9.5	3	9.5
AT1G22500	25.5	31	13.5	14	29.5	8	28	23	20	47.5	17.5	97.5	44.5	39.5	38.5	50.5	27	21.5	28	23.5	22	26	1	19.5	46.5	18	23.5	9.5
AT1G22510	12.5	6	6.5	24.5	22.5	17	16	9	24.5	13	15	0	18.5	10.5	18.5	16	15.5	15	15	19	18.5	15	27	15.5	22.5	17	18	5
AT1G22520	59.5	74.5	90	61.5	84	64	80	77.5	70.5	76	61.5	59	85.5	81	64	61.5	63.5	75	64.5	69.5	67.5	73	38.5	78.5	81	69.5	77	51
AT1G22530	844	896.5	771.5	318.5	368	354	517	504	591	614.5	660.5	819.5	537.5	594	613	591	587.5	484	665	521	411	484	697	563.5	523.5	672.5	567	807.5
AT1G22540	65.5	52	54.5	61.5	58.5	36	53	85.5	60.5	68.5	66.5	89	47	39.5	49	49.5	40	36.5	44.5	64.5	50	49	38.5	21.5	61	71.5	45.5	38
AT1G22550	81	96	104.5	58	71.5	52	56	83.5	81	47.5	91	59	160	134	102	159	165	111	130	91	86.5	83	27	115.5	102	77.5	131.5	126
AT1G22570	6.5	4.5	6.5	4.5	4.5	4.5	4	5.5	11.5	13	0	0	4.5	4.5	7	6	9	9	10	3.5	12.5	6	1	9.5	5.5	5	3	3
AT1G22620	65.5	74.5	94	81.5	77.5	70.5	83	79.5	71.5	91	46	106.5	91	57	85.5	63.5	97.5	82.5	71.5	85	79.5	69.5	27	117.5	37	77.5	59.5	70.5
AT1G22640	91.5	77	113.5	84	91	80.5	83.5	96	98.5	37	115	102	64	77.5	62	66.5	67.5	58	64.5	63.5	66.5	94	77	49	76	58	97	70.5
AT1G22650	24.5	8.5	22.5	23.5	25.5	30.5	44	21	24.5	26.5	20.5	30.5	23.5	50	39.5	33	34	30	19	22.5	28	21.5	1	23.5	9.5	38	18	19.5
AT1G22660	50.5	40.5	41	50	40.5	36	40.5	46.5	24.5	23.5	51.5	55	38.5	52.5	42.5	43.5	40	36	36	40.5	53.5	48	15.5	27.5	71.5	27.5	37	24.5
AT1G22700	32	38	56.5	32	30	34.5	37.5	36.5	44.5	54.5	25.5	76	28.5	23.5	24.5	29	29	27	25	36	35	34.5	1	33.5	18	46.5	18	27
AT1G22710	96	70	136.5	200	216.5	246	238.5	130.5	160	151.5	150.5	97.5	70	109	73.5	63.5	78	70.5	66.5	178	158.5	152	89	131.5	137.5	69.5	79.5	73
AT1G22730	73	63.5	75	83	76	95	70.5	85.5	74	65.5	69.5	30.5	72.5	84.5	81	46	83.5	74	82.5	90.5	79.5	85.5	38.5	89	51.5	94	77	76
AT1G22740	29	15	34	23.5	23.5	32	25	32.5	36.5	58	33.5	6	37	19.5	33	33	41.5	28.5	39.5	19	23.5	27	27	23.5	13.5	20	32	9.5
AT1G22750	136	197	99.5	119.5	132.5	82	110	148.5	116.5	69	93	93	126	105.5	125	143	130.5	122.5	120.5	109	102.5	122.5	183.5	150.5	107	131.5	116.5	116.5
AT1G22770	314	370.5	371	272	287.5	265.5	286.5	305.5	247.5	288	257.5	273	266.5	278	300	259	285.5	281	287	279.5	302	251.5	411.5	349.5	244	323.5	307.5	231
AT1G22780	403	349.5	498.5	543	539	586	529.5	446.5	560.5	510	535.5	539.5	604	485	541	549	542	701.5	581	527	557.5	499	565	554.5	561	603.5	557.5	459.5
AT1G22790	57	52	77	62.5	77	84.5	91	96	87	94.5	59.5	156	77	84.5	76	77	96	98.5	79.5	75	98.5	80	168.5	65.5	143.5	59.5	103	91.5
AT1G22830	12.5	13.5	0	9	7	8	4	12.5	13	23.5	7	6	11.5	11	16	10.5	12.5	12.5	12.5	14	9.5	13.5	1	17.5	5.5	15.5	5.5	5
AT1G22840	320.5	287	313.5	433.5	402.5	385	360.5	327	343.5	422	273	418.5	455	385	417.5	414	498.5	469.5	385	348.5	324.5	306.5	168.5	337	272	308.5	303	296.5
AT1G22850	55	49.5	34	55	44.5	59	39.5	60	54	61.5	23.5	35	43.5	48.5	61	52.5	50	57.5	44	67	47	56	77	69.5	27.5	34	34.5	30
AT1G22860	81	119.5	109	75	68.5	76.5	80	69.5	95.5	105.5	91	66.5	57.5	104	83	71.5	123.5	102	94	98.5	92.5	92.5	77	103	91.5	118.5	91	108
AT1G22870	74.5	47	63.5	69.5	53	65.5	67.5	102	66.5	23.5	71.5	59	40.5	68	78	52.5	60.5	55	57	52	66.5	46.5	51	59	27.5	72.5	26	48.5
AT1G22880	55	86.5	82	73.5	74	85	101.5	54.5	78	30	77	55	83.5	71.5	59	65.5	63.5	79	56	75	70.5	68.5	197	85	86	59.5	65.5	111
AT1G22882	58	84.5	56.5	41.5	45	37	42.5	46.5	82.5	119.5	64.5	35	57	55.5	71.5	51.5	54	65.5	70.5	55	55	51.5	77	23.5	97	58	62.5	56
AT1G22885	22.5	29	27	37.5	31	52	37.5	44.5	34.5	40.5	28	39	57	40.5	24.5	37	25.5	28.5	29	30	21.5	44.5	38.5	33.5	51.5	32	23.5	38
AT1G22910	115.5	126	77	75	69.5	83.5	89	85.5	63.5	72.5	85.5	76	54	73	85.5	57.5	108.5	99	105.5	74.5	88	78	77	83	76	84.5	82.5	59
AT1G22920	82.5	58.5	124	83.5	91	113	108	100	97	84	66.5	71.5	111	107.5	115	104	146.5	94	98.5	80	105	94	77	122.5	37	97.5	135	89
AT1G22930	762.5	865	636.5	771.5	819.5	679.5	651	735.5	720	1050.5	864	1116.5	527	703.5	717	498.5	452.5	464	602.5	726	624	824.5	871	777	643	726	698.5	698
AT1G22940	61.5	36	29	22.5	29	25	29	42.5	26.5	30	38.5	84.5	26.5	25	39.5	20	30	34.5	26.5	29	27	31	63.5	25.5	27.5	50	21	48.5
AT1G22950	36	40.5	45.5	45.5	35	37	29	50.5	30	61.5	31	26	28.5	37	50	36.5	32	36	38.5	37	33	37	1	34	56	32	65.5	22.5
AT1G22960	19.5	36	17.5	30.5	29.5	36	19.5	31	36.5	16	20.5	13.5	26	37	36	29	12.5	33	26.5	29.5	22.5	32	27	21.5	76	23.5	13	17
AT1G22970	30	26.5	43.5	51.5	31	38.5	35	56	40.5	40.5	38.5	26	46.5	34	50	36.5	43.5	54	38	46.5	45.5	47	89	53	61	72.5	50.5	64.5
AT1G22980	1	0	0	5	2	1	0	0	10.5	16	3	0	7	10.5	4	5	1.5	3.5	2	0	5.5	7	1	0	0	2.5	8	0
AT1G22985	1	13.5	32	7.5	7	10.5	19.5	12.5	6.5	0	15	22	23.5	11.5	9.5	15	6	4.5	4.5	7	10	9	1	2.5	9.5	15.5	15.5	3
AT1G22990	37.5	33.5	32	43.5	55	59	35	42.5	22.5	23.5	23.5	35	41.5	36	35.5	35.5	22.5	21.5	33	55	50.5	57	38.5	47.5	18	9.5	8	27
AT1G23000	22.5	13.5	17.5	16	20.5	26.5	22.5	15	14	37	10	10	15	16	16	22.5	12.5	31	23.5	17	13	22.5	15.5	39.5	9.5	20	18	19.5
AT1G23010	76.5	82	37	68.5	62.5	85	64.5	60	56	105.5	54	80.5	60	83	46	62.5	47	42.5	49	71.5	57	54	38.5	41.5	27.5	62	23.5	24.5
AT1G23020	78	115	68.5	94	92	70.5	72	92	62.5	87	88	66.5	82	79.5	99	123.5	81.5	121.5	110	111	81	70.5	128.5	76.5	107	77.5	59.5	100.5
AT1G23030	142.5	197	160	98.5	93	98	119.5	114	110	167.5	164	93	115.5	142.5	142.5	100.5	129.5	99	131.5	131.5	119.5	106	114	146	122.5	125.5	111	202.5
AT1G23040	70.5	42.5	37	40.5	55	33	48	54.5	36.5	13.5	43.5	62.5	101	65.5	65.5	55	40	45.5	42	49	50	35.5	15.5	37.5	32	17	26	40.5
AT1G23060	9.5	4.5	6.5	12.5	15.5	4.5	10	5.5	6.5	13.5	7	0	9	5.5	4	10.5	3	10.5	9.5	11.5	7	7.5	1	9.5	5.5	5	13	12.5
AT1G23080	127.5	150	152	99	107	149	114	130.5	92.5	116.5	93	76	127.5	107.5	136	99.5	130.5	104	126	110	131.5	100	89	114	118	126	106	137
AT1G23090	9.5	13.5	8.5	3.5	8.5	7	12.5	7	9	0	0	6	5	0	4	12.5	1.5	1	6	7	4.5	9	15.5	11.5	5.5	2.5	18	5
AT1G23100	13.5	15	4.5	20.5	17.5	36	31	32.5	22.5	10	25.5	0	48	27	33.5	21	25.5	31	19.5	16.5	22.5	15	1	11.5	51.5	28	15.5	24.5
AT1G23120	19.5	42.5	32	43.5	34	32	36	31	26.5	76	43.5	39	47	31	34.5	60	52	27.5	44.5	35	31.5	27.5	38.5	45.5	46.5	36.5	21	40.5
AT1G23140	29	60.5	15.5	11.5	20.5	9.5	15.5	23	18	30	46	62.5	34	16	22.5	30	27	16	26.5	12.5	9.5	18	15.5	15.5	18	20	15.5	30
AT1G23150	21.5	45	15.5	22.5	34.5	20	32	19	35	16	43.5	39	39	47.5	48.5	33	34	21	37.5	33	25	41.5	77	34	71.5	34	29	64.5
AT1G23160	1	8.5	0	2	5	4.5	6	7	13	0	5	0	0	4.5	0	2	3	5	2.5	4.5	0	3	1	6	5.5	20	3	30
AT1G23170	34.5	63.5	45.5	72	45	50.5	65.5	38.5	56	61.5	56	39	56	45.5	50	50.5	38.5	42.5	45.5	51	43.5	38	15.5	67.5	22.5	50	50.5	61.5
AT1G23180	32	40.5	41	39	45.5	41.5	37.5	46.5	55	47.5	51.5	66.5	34	44.5	44	39	38.5	36	45.5	50	67.5	60.5	1	35.5	46.5	29	56.5	45.5
AT1G23190	433.5	452.5	517.5	754.5	737.5	785	661.5	623.5	679.5	462	547.5	425.5	504	543	532.5	497	560.5	472.5	477	705.5	668.5	661.5	777.5	697	394	620	500.5	459.5
AT1G23200	13.5	8.5	41	41.5	59.5	46.5	37.5	38.5	43	0	15	30.5	33.5	21	23.5	24.5	23.5	27.5	29	45.5	67.5	46.5	38.5	13.5	46.5	23.5	13	22.5
AT1G23205	9.5	15	24.5	4.5	3.5	1	11.5	11	3	0	12.5	6	11.5	10.5	7	20.5	10.5	10.5	16.5	8	7	3.5	1	21.5	5.5	6.5	15.5	12.5
AT1G23210	6.5	2.5	6.5	9.5	4.5	3.5	9	5.5	11.5	0	0	6	5.5	5.5	3.5	4.5	9	3	6	7	6	5.5	27	4.5	5.5	9.5	3	5
AT1G23220	30	24.5	38.5	41.5	62.5	52	61.5	38.5	44.5	34	33.5	22	42.5	37	32	36	23.5	39.5	36	36	36.5	37	51	15.5	71.5	31	34.5	40.5
AT1G23230	144.5	157.5	138.5	156	157.5	166.5	165.5	150.5	150.5	101.5	179	89	89	167.5	146	110	119.5	154	149	179	179.5	133.5	101.5	117.5	107	166.5	169	131.5
AT1G23260	156	137.5	131.5	146.5	135	142.5	151	114	111	186	187	119.5	200.5	142	135	168.5	181	150	144	146	115.5	133.5	89	142.5	137.5	116.5	135	108
AT1G23280	68.5	47.5	65.5	100	82	87.5	90	74	81	47.5	135	97.5	124.5	92	99.5	99	103.5	104	91.5	92.5	95	114	77	89	143.5	89	103	106
AT1G23310	244	240.5	235.5	212	271	164.5	231	234.5	249	175.5	206	156	278	230	251	260	273	225.5	206.5	243	241.5	271	283	282	238	233.5	232.5	235.5
AT1G23330	199	205	198	144	160.5	138.5	165	159	146	127	166.5	133.5	162.5	147	178	178	165	168.5	189	148.5	130.5	148.5	102	187.5	203.5	148.5	97	154
AT1G23340	25.5	15	11	27	23.5	13.5	10.5	16.5	21.5	19.5	33.5	30.5	24	25.5	14	14.5	23.5	18	23.5	32	25.5	17	51	23.5	27.5	31	21	17
AT1G23360	16.5	24.5	29	20.5	24.5	21.5	25	15	28	10	25.5	6	20	16	27.5	31	23.5	38	29	20.5	16	32	1	11.5	41.5	12.5	37.5	30
AT1G23380	22.5	22.5	27	51.5	47.5	50.5	36	31	28	23.5	28	50.5	36.5	38.5	46.5	37	32	31	41.5	31	41.5	40.5	38.5	37.5	37	31	37.5	54
AT1G23390	78	63.5	32	39.5	27	33	50.5	48.5	43	65.5	64.5	30.5	39	36	40.5	38.5	32	29	26	68.5	50.5	60.5	27	63.5	102	35	34.5	38
AT1G23400	27	13.5	15.5	24.5	27	28	31	16.5	28	19.5	7	39	22.5	23.5	21	30	27	19.5	26	33	24.5	17	38.5	34	66	23.5	42.5	12.5
AT1G23440	279.5	232	217	328.5	318	213.5	221.5	292	227.5	352.5	206	285.5	377	310.5	327.5	300	251	227.5	284	223.5	203.5	243.5	269.5	187.5	204	149.5	238.5	217.5
AT1G23450	1	4.5	0	6	1.5	4.5	5.5	5.5	4.5	0.5	0	0	0	3	0	1	4.5	2	2.5	1	1.5	3.5	1	0	0	3.5	3	0
AT1G23460	43.5	31	32	37.5	50	48	64.5	48.5	43.5	51	40.5	89	46.5	33	35	40.5	35	28	25.5	43.5	51	60.5	51	49	56	35	56.5	17
AT1G23465	3.5	2.5	2.5	5	1	3.5	0	5.5	3	13.5	3	0	2.5	1	3	5	3	3	2	1	0	1.5	1	6	0	1	13	3
AT1G23480	55	45	43.5	56	45.5	32	25	71.5	43.5	61.5	61.5	30.5	29	30	54	36	54	47.5	43	49.5	38	51.5	38.5	78.5	97	36.5	56.5	73
AT1G23490	506.5	466	448	592	515	533.5	596.5	612.5	523.5	481	557.5	488.5	549	453.5	509	488.5	503.5	625	546.5	475.5	492	490.5	428.5	400.5	639.5	587	591	450
AT1G23530	33.5	29	27	18.5	24.5	30.5	45.5	25	22.5	26.5	23.5	39	38.5	25.5	13.5	31	29	23.5	27	33	32	41.5	27	51	37	32	29	30
AT1G23540	5	4.5	0	0	0	2.5	2.5	2	2	0.5	0	6	1.5	0	2	3.5	7	1	4.5	0	1.5	1	1	0	0	2.5	0	0
AT1G23550	10.5	13.5	4.5	7.5	7	9.5	4	3.5	3	0.5	7	18	8	8.5	12.5	8	22.5	5.5	8	5.5	7	7.5	15.5	19.5	5.5	3.5	10.5	24.5
AT1G23560	13.5	24.5	20	14	23.5	18.5	12.5	32.5	15.5	19.5	23.5	35	16	16.5	18.5	22.5	17	25	18	20.5	27	23.5	15.5	17.5	13.5	23.5	15.5	30
AT1G23710	13.5	8.5	15.5	15.5	12.5	25	33.5	25	16.5	26.5	15	10	33.5	25.5	22.5	22.5	23.5	20	20.5	19	12.5	17	38.5	39.5	18	21.5	18	17
AT1G23720	807.5	764	691	406	349.5	215.5	316	569	455	666	504	892	424	829	921	676.5	435.5	404.5	529.5	827.5	601.5	288	742.5	423	416.5	426.5	378.5	438.5
AT1G23730	0	2.5	0	10.5	8	7	7	0	3	0.5	7	0	2.5	0	2.5	3.5	3	0	0	12.5	16.5	15.5	1	6	0	0	0	0
AT1G23740	18	24.5	4.5	10.5	10.5	8	6	7	15.5	16	0	6	5	3.5	10	7	12.5	5	6.5	12.5	7	12.5	1	2.5	0	10.5	5.5	7
AT1G23750	46.5	77	63.5	97	92.5	85	90	98	75.5	119.5	85.5	93	98.5	74	93	97	116.5	86.5	73.5	81.5	45.5	70.5	51	65.5	76	64.5	77	97.5
AT1G23760	40.5	47.5	20	15.5	13.5	20	27.5	31	16.5	0.5	40.5	13.5	25.5	16	9.5	37.5	17	24.5	31	15	25	20	1	32	37	39.5	42.5	27
AT1G23780	125.5	84.5	99.5	110	110.5	85	99	104	70.5	69	85.5	66.5	92.5	95	91.5	90	83.5	88	76.5	76.5	85.5	107	51	65.5	86	97.5	111	95
AT1G23790	9.5	8.5	4.5	12.5	14	13.5	13.5	23	4.5	0.5	5	13.5	10.5	10.5	11.5	9.5	6	14	11.5	11.5	17	9.5	1	8	18	28	5.5	7
AT1G23800	168.5	221	243	272	240.5	295.5	228.5	207	206	170.5	217	230	199.5	169.5	148.5	221	203	154	168.5	287	284	277	226	194.5	189	185	160	172.5
AT1G23820	238	290.5	235.5	241.5	241.5	279.5	258.5	240	232	273	248.5	382.5	275	265.5	230.5	266.5	267.5	275.5	272.5	227	289	275	269.5	216.5	272	252	312.5	207.5
AT1G23850	34.5	15	24.5	17	14	14.5	19.5	27	28	34	10	35	22.5	24.5	21.5	33	27	40.5	40.5	19	24.5	14	15.5	51	46.5	20	42.5	38
AT1G23860	96	56	75	90	79	90	95	71.5	91	51	112	66.5	105	79.5	74.5	97	69	103	83	83	62	59.5	51	127	91.5	64.5	56.5	61.5
AT1G23870	209	111	165	166.5	159.5	159.5	162.5	121.5	143.5	238.5	115	146.5	118.5	147.5	161	166.5	143.5	131.5	169.5	156	127.5	180	89	163	189	156	126	119.5
AT1G23880	10.5	4.5	11	13.5	10.5	8	10	9	8	16	3	10	4.5	5.5	8	20.5	7	9	8	15	16.5	20	1	17.5	9.5	3.5	18	7
AT1G23890	48	60.5	50	37	45.5	42.5	47	50.5	39.5	72.5	31	62.5	40.5	45.5	44.5	46	47	49.5	55	39.5	51	50.5	51	27.5	41.5	42.5	10.5	27
AT1G23900	230	150	188	200	187.5	197	190.5	272	210	243	159	212.5	138.5	194.5	221.5	168.5	188	194.5	182.5	198	196	160.5	114	214.5	164	208	200.5	192
AT1G23935	16.5	19.5	37	36	38.5	21.5	24.5	23.5	38	26.5	20.5	50.5	17.5	19.5	28.5	13.5	22.5	17.5	23.5	34	29	37	15.5	11.5	27.5	20	32	35
AT1G23950	91.5	106	84.5	81.5	87	91	85.5	98	66.5	43.5	74	59	99	91	93.5	83.5	59	70	85.5	76.5	79.5	77.5	15.5	129.5	107	66.5	62.5	64.5
AT1G23960	101.5	162	157	147.5	151	132.5	110	150.5	155	112.5	196	119.5	118.5	115.5	105.5	121.5	123.5	127.5	134	133.5	125.5	108	51	150.5	159	141.5	111	91.5
AT1G23970	48	45	37	23.5	32	28	40.5	34.5	21.5	94.5	59.5	26	30	40.5	37.5	43.5	43.5	29.5	35.5	28.5	32	27	38.5	69.5	76	38	29	45.5
AT1G23980	6.5	8.5	6.5	5.5	5.5	10.5	4	0	5.5	0.5	0	0	3.5	2	2	7	4.5	7	3.5	4.5	4.5	6	1	25.5	0	1	13	9.5
AT1G24030	8	0	0	4.5	0	4.5	1.5	7	8	0.5	7	10	0	3.5	6	4.5	0	3	2	2.5	2.5	7	15.5	6	0	0	3	5
AT1G24040	13.5	8.5	22.5	24.5	14	18.5	18.5	21	18	0.5	20.5	18	14	11.5	21	22.5	35	17	19	18	25.5	16	15.5	17.5	51.5	24.5	29	7
AT1G24050	205	227.5	254	285.5	264.5	269.5	342	169.5	263.5	386	246	146.5	259.5	209.5	231	201.5	231	323	231.5	212	219.5	275	168.5	230	204	208	313	279.5
AT1G24090	5	2.5	4.5	15	7	10.5	2.5	2	8	26.5	3	13.5	7	2	10.5	7	12.5	12.5	9.5	6	5.5	5.5	15.5	6	18	17	23.5	5
AT1G24095	8	13.5	8.5	17	12.5	8	12.5	11	11.5	30	17.5	30.5	17	13.5	17	19	17	11.5	13.5	14.5	7	16	1	13.5	27.5	6.5	8	30
AT1G24100	234.5	230.5	268.5	107.5	134.5	159.5	224	169.5	228.5	209	159	156	382.5	370.5	339	392.5	422	347.5	347.5	216.5	243	201.5	339	244.5	204	269.5	307.5	235.5
AT1G24120	90	103.5	75	51	59.5	69.5	89	58	88.5	76	61.5	169.5	64.5	95	96.5	113	132.5	89.5	101	88	93	101.5	51	63.5	107	100	62.5	85.5
AT1G24130	13.5	8.5	15.5	7.5	15	13.5	15.5	0	4.5	0.5	33.5	18	5	3	9	8.5	14	5.5	9.5	8	7	12.5	38.5	13.5	0	5	0	3
AT1G24140	1	4.5	2.5	1	3.5	0	0	0	0	0.5	5	0	0	0	1	1.5	3	0	2	1.5	1.5	1	1	0	0	2.5	0	9.5
AT1G24150	87	91.5	52	65.5	78	55	74	69.5	81	44	112	47	48	74	82.5	65.5	74	55	83	75	51	79	89	65.5	122.5	79	71.5	46
AT1G24160	120.5	113	121	142.5	182.5	170	129.5	124	147	61.5	126	115	101	103	105	112	65.5	106.5	98	131.5	133.5	139.5	51	105.5	122.5	134	153.5	128.5
AT1G24170	114	91.5	92	92.5	86	87.5	91	77.5	86	105.5	74	71.5	117.5	118.5	103.5	87	62	82.5	107.5	71	70.5	102.5	63.5	43.5	107	89	85.5	111
AT1G24180	788	752.5	657.5	693.5	659	539	654	738.5	646.5	684	640.5	660	728.5	730	749.5	629.5	659	636.5	607.5	654	532	587.5	519	547.5	645	624.5	639.5	594
AT1G24190	205	162	147.5	157	152	175.5	134	167	145	123.5	166.5	128.5	99	184.5	152.5	108.5	150	116.5	131.5	153	151.5	151.5	102	165.5	113	167.5	255.5	205.5
AT1G24240	30	22.5	43.5	39	35	38.5	37.5	19	38	37	36	22	36.5	38	32	43.5	35	47	39.5	22.5	30	34	27	49	27.5	42.5	45.5	27
AT1G24265	12.5	6	17.5	12.5	6	9.5	11.5	15	11.5	19.5	17.5	10	14.5	11.5	14	9.5	19	15	16	11.5	13.5	9.5	1	0	13.5	5	5.5	24.5
AT1G24267	82.5	45	131.5	105	98.5	135	87.5	104	111	76	85.5	89	109.5	115.5	103	120.5	105	110	114	105	107.5	92	51	105.5	56	101.5	74	91.5
AT1G24280	146	137.5	175	135.5	157.5	150.5	107	150.5	99.5	206	129.5	156	288	352	365.5	223.5	241.5	210.5	218.5	129	145	129.5	141.5	142.5	159	165	169.5	200.5
AT1G24290	2.5	6	0	0	0	1	5	2	4.5	0.5	3.5	0	2.5	2	2	1.5	7	3.5	4.5	3.5	0	3	1	0	0	0	0	12.5
AT1G24300	145	217.5	165	160	145	156.5	182	167	160	163	226	230	141	204	167.5	152	173	144	159	156.5	170.5	156	358.5	192.5	128.5	135	183.5	179
AT1G24310	59.5	56	75	74.5	75	60.5	91	67.5	64.5	69	61.5	39	81	77.5	84.5	80.5	60.5	86.5	68.5	69.5	83	57	168.5	39.5	56	82.5	103	51
AT1G24320	46.5	49.5	29	43.5	30	26.5	41.5	36.5	33	19.5	31	80.5	33.5	38.5	43.5	41.5	41.5	41.5	30	42.5	36.5	41.5	77	51	32	36.5	29	22.5
AT1G24330	16.5	10.5	15.5	5	9.5	4.5	13.5	9	6.5	0.5	0	43	8	11.5	8	6	4.5	9	9.5	10	10	7.5	51	13.5	0	6.5	5.5	7
AT1G24340	65.5	84.5	50	79	73	65.5	85.5	54.5	70.5	58	82.5	138.5	51	69.5	70.5	51.5	48.5	52	63.5	84.5	84.5	66.5	38.5	71.5	46.5	79	45.5	76
AT1G24350	73	70	63.5	53	44.5	50.5	48	56	47.5	40.5	43.5	59	67.5	46.5	61	63.5	50	50.5	55	66	53.5	54.5	51	51	51.5	45.5	62.5	48.5
AT1G24360	460.5	412.5	367.5	463	493	475.5	421.5	410	564.5	352.5	576	560.5	533.5	469	474.5	505	459.5	541	506	465	480.5	515.5	359	574	444	394	488.5	436
AT1G24405	2.5	4.5	2.5	4.5	3.5	3.5	4	3.5	1	0.5	0	0	3.5	5.5	2	2.5	1.5	3	0	3.5	4.5	3	1	0	0	2.5	0	5
AT1G24420	18	10.5	13.5	3.5	5.5	2.5	0	16.5	18	13.5	20.5	6	14.5	20	10	20	23.5	17.5	19	12.5	2.5	15.5	38.5	2.5	5.5	23.5	23.5	27
AT1G24430	52	45	45.5	68.5	71.5	76.5	46.5	65.5	70.5	87	74	59	46.5	49	46.5	59	55	52	56	57	69.5	68	27	69.5	61.5	40.5	29	27
AT1G24440	71.5	65.5	77	59	61.5	56	66.5	52.5	54	61.5	71.5	39	102	79.5	59	60	59	53.5	51.5	73	43.5	76	183.5	47.5	37	64.5	40	51
AT1G24450	30	42.5	29	36	57	46.5	38.5	44.5	50	58	38.5	39	56	43.5	39.5	46	76	52	48	37.5	53.5	32	77	34	37	32	40	35
AT1G24460	193	187	256	189.5	223	227	174	179	184.5	218.5	214.5	225	115.5	195.5	193	165.5	209	174	192.5	197.5	216.5	218.5	183.5	232	251	238	175.5	217.5
AT1G24490	62.5	45	52	42.5	53	69.5	64.5	58	59	54.5	61.5	80.5	69	68.5	62.5	56.5	40	65.5	70.5	62	59.5	50.5	1	69.5	32	72.5	74	56
AT1G24510	604	466.5	723	739.5	749.5	751.5	698	645.5	773.5	659	676.5	600.5	590.5	752.5	741	677.5	760.5	706	741	710	734	697	929	855.5	736.5	790.5	636.5	855.5
AT1G24530	37.5	47.5	68.5	36	38.5	37	40.5	34.5	39.5	61.5	31	39	35	41.5	34	35.5	38.5	41.5	44.5	44.5	44.5	51.5	63.5	17.5	18	26	40	35
AT1G24560	84	91.5	126	99	103	95	110	90	88.5	206.5	101.5	62.5	130.5	110	114	91	116.5	82	88	102.5	103.5	121.5	102	127	159	96	82.5	119.5
AT1G24575	33.5	22.5	27	12.5	20	30.5	33	34.5	28	13.5	25.5	13.5	69.5	59	38.5	38.5	32	39.5	43	21.5	18.5	37	1	53	9.5	40.5	42.5	24.5
AT1G24580	0	0	0	1	7	1	3.5	9	1	0.5	0	0	0	3	2	0	0	0	0	1.5	0	0	1	0	0	0	0	0
AT1G24600	6.5	2.5	8.5	10.5	12.5	18.5	10	21	8	13.5	0	13.5	12.5	8.5	5.5	9	0	8	1	13.5	7	9.5	1	8	0	9.5	13	3
AT1G24610	48	19.5	50	61.5	48	56	52.5	56	43.5	61.5	56	80.5	56	39.5	45.5	50.5	48.5	56	43.5	57	55	53	102	59	46.5	58	42.5	38
AT1G24620	3.5	10.5	0	1	1	0	0	2	1	0.5	0	0	5.5	5.5	5	3.5	3	3	2.5	2.5	3.5	1.5	1	0	0	3.5	3	12.5
AT1G24625	57	60.5	43.5	50	48	53	60	56	55	47.5	77	97.5	95	63.5	64	79	67.5	72.5	65.5	64.5	69.5	63.5	77	81	113	84.5	82.5	111
AT1G24706	180.5	185	146	202.5	146	198	142.5	182.5	172.5	112.5	224	208	134	192.5	174.5	119.5	186	146.5	187	199.5	226	205	154	259.5	189	215.5	255.5	165
AT1G24735	22.5	17	13.5	37	34	22.5	21.5	54.5	55	34	12.5	43	36	36.5	40.5	35	32	24.5	27.5	18	24.5	27	38.5	21.5	18	10.5	10.5	27
AT1G24764	101.5	40.5	92	115	94.5	104	117.5	102	88.5	84	66.5	175	79.5	112	88	62.5	105	79	87	96	96	109	15.5	83	133.5	72.5	50.5	61.5
AT1G24996	607	240.5	251	360	287	429	43.5	21	375.5	40.5	504.5	106.5	438.5	146	400	35	360.5	335	38	28	212	161.5	394	444	18	35	512	17
AT1G25054	8	0	2.5	2.5	9.5	1	8	0	1	1	0	10	2	7	7	0	1.5	11.5	0	2.5	11	2.5	51	0	0	0	0	0
AT1G25220	136	91.5	75	95	97	90	94	98	74	34	82.5	89	163	166.5	147.5	200	205	193.5	170	98.5	107.5	93.5	38.5	57	154	118.5	91	97.5
AT1G25230	123.5	119.5	82	60	45.5	53.5	76.5	71.5	71.5	69	80	80.5	70.5	121.5	81.5	146.5	134.5	113	125	74	68.5	74	77	112	113	99	103	106
AT1G25250	1	0	0	0	2	1	3.5	0	6.5	16	5	18	6	1	2.5	2	1.5	2.5	2.5	5	2	1	1	9.5	5.5	0	3.5	3
AT1G25260	219.5	211.5	212	246	228.5	285.5	203	199	201.5	186.5	260	263.5	247	189	246	234	223.5	341	266.5	240	285.5	251	378.5	259.5	261	255.5	198	208
AT1G25275	58	54	52	106	105.5	65.5	100	85.5	57.5	72.5	56	62.5	94	68.5	64	61	41.5	55.5	50.5	65.5	47	70.5	63.5	59	37	38	48	70.5
AT1G25280	168.5	164	131.5	165.5	179	166.5	175.5	171.5	148.5	141.5	164	175	183.5	153.5	198	195.5	148.5	208	193.5	173	156	153	197	161.5	169.5	137.5	129.5	97.5
AT1G25290	9.5	6	11	12.5	12.5	10.5	10.5	31	8	1	10	0	15.5	17	11.5	14	10.5	15.5	18	13.5	18	14	1	13.5	13.5	17	8	0
AT1G25320	24.5	19.5	2.5	20.5	28	29	37	27	19	1	31	39	27.5	20	31	23.5	37	31	24.5	24.5	22.5	31	51	29	51.5	8	29	38
AT1G25350	243	254	279.5	253	265	304	244	240	304	284.5	226	294.5	246	264	288.5	244.5	293	313	300	292.5	265.5	238.5	226	260	272	378.5	242.5	235.5
AT1G25360	2.5	4.5	0	9.5	7	4.5	7	12.5	13	1	5	13.5	10.5	7	9.5	7	4.5	14	9.5	5.5	6	3	1	2.5	9.5	3.5	3.5	30
AT1G25370	25.5	22.5	37	17	15.5	26.5	30	36.5	22.5	19.5	20.5	18	38.5	25.5	24.5	23.5	19	23.5	24.5	16	18	31	38.5	32	9.5	17	42.5	5
AT1G25375	25.5	31	29	41	36.5	28	46.5	38.5	36.5	20	46	6	18	31	33	31	35	31	26.5	27.5	37.5	34.5	15.5	32	51.5	24.5	21	40.5
AT1G25380	61.5	94	63.5	88	89.5	105.5	89	110	83.5	16	59.5	89	114	78	100	80	96	99.5	82.5	95	79	82	51	107.5	97	103.5	85.5	51
AT1G25390	46.5	84.5	34	34.5	36.5	36	37	50.5	33	54.5	51.5	31	62	68.5	58	57	54	42.5	48.5	45.5	47	41.5	51	37.5	22.5	40.5	34.5	35
AT1G25400	10.5	33.5	22.5	7.5	20.5	13.5	12.5	11	10.5	23.5	5	10	14.5	18.5	13.5	12.5	0	10	8.5	6	5.5	5.5	1	13.5	18	15.5	5.5	14.5
AT1G25420	82.5	113	90	99	103.5	105.5	96	81.5	99.5	91	123.5	62.5	103	81	93	83	87	101	102	101	105	83	114	93.5	66.5	74.5	126	64.5
AT1G25422	0	0	0	2	0	6	0	2	2	1	0	0	6	2	1	1.5	3	2.5	2.5	1	2	3	1	0	0	0	0	0
AT1G25425	0	2.5	0	5	5	4.5	1.5	0	1	1	3.5	0	0	2	1	0	1.5	3.5	1	1	0	1.5	1	0	0	1	0	5
AT1G25440	6.5	4.5	0	1	3.5	2.5	0	0	11.5	1	3.5	0	1	3	1	9.5	1.5	4.5	0	4.5	3.5	3	1	2.5	13.5	5	0	0
AT1G25450	32	22.5	20	13.5	21.5	12.5	25	9	18	54.5	15	10	21.5	24.5	32	30	12.5	24.5	32	22.5	20	17	38.5	9.5	9.5	14	26	12.5
AT1G25460	2.5	2.5	2.5	4.5	3.5	3.5	3.5	11	2	1	5	0	1	2	2.5	1.5	1.5	0	5	1.5	3.5	6	1	4.5	0	1	0	3
AT1G25470	27	10.5	20	33	36.5	28	19.5	25	24.5	23.5	41	31	16.5	24.5	32	23.5	23.5	17	43.5	39	34.5	34	27	34	51.5	51.5	26	24.5
AT1G25480	91.5	74.5	65.5	40.5	45	41.5	41.5	48.5	69	26.5	61.5	97.5	51	47.5	53	49.5	50	54	49.5	52	43.5	30	15.5	45.5	46.5	63.5	71.5	70.5
AT1G25490	408	354.5	378.5	396	341.5	389.5	394.5	382	346	448.5	370.5	276.5	323.5	387	396.5	373	433	403	358	402	434	404.5	270	420.5	388	383.5	431.5	434
AT1G25500	43.5	33.5	50	44.5	39.5	30.5	52.5	23.5	49	54.5	15	93	34.5	29	31	28	34	39.5	40.5	41.5	27	41.5	27	21.5	5.5	45.5	42.5	43.5
AT1G25510	43.5	42.5	50	43.5	38	44.5	72	38.5	53	23.5	46	6	39.5	49	48.5	49	52	39.5	37.5	37	54	36	1	27.5	9.5	51.5	23.5	27
AT1G25520	84	67.5	79.5	75	100.5	70.5	74.5	81.5	82.5	30	41	142.5	69	69.5	79	66.5	99.5	80	77	71.5	67.5	110	102	65.5	71.5	83	77	64.5
AT1G25530	165	121.5	167.5	244	235.5	276.5	146.5	201.5	203	69	179	93	109	136.5	74	120.5	94	105	115	162	239	191.5	141.5	131.5	122.5	116.5	129.5	131.5
AT1G25540	150	182.5	134	121.5	109	104	135	126	98.5	87	138.5	111	82	151.5	121.5	108.5	99.5	115.5	113	127	123.5	130	102	107.5	66.5	105	120.5	89
AT1G25550	316	328.5	268.5	142.5	124.5	129.5	157.5	161	156	257	206	234	123.5	137.5	118.5	111	103.5	121.5	124.5	127	89	121.5	154	140	122.5	177	175.5	211.5
AT1G25560	107.5	103.5	138.5	58.5	29.5	46.5	107	71.5	69	105.5	77	97.5	53	53.5	50.5	62.5	22.5	58	56	63.5	40.5	80	89	74	122.5	66.5	68.5	89
AT1G25570	154	128.5	129.5	153	179	132.5	151	187	161.5	105.5	143.5	191.5	124.5	160	156.5	147.5	145	138	156.5	146	160	133	226	168.5	128.5	163	138	137
AT1G25580	44.5	52	52	57	46.5	37	76	46.5	54	34	36	18	57	57	47.5	47.5	57	50.5	53	50.5	67.5	61.5	114	69.5	22.5	53.5	40.5	85.5
AT1G25682	46.5	72	59	58	63.5	75	76.5	52.5	70.5	80	77	39	91	63.5	76	93	70.5	59	53.5	62.5	67.5	65.5	51	53	41.5	48.5	37.5	48.5
AT1G26090	27	19.5	32	28.5	28	28	27.5	25	19	26.5	36	31	34	25	29	23.5	17	26	34	26	26.5	27.5	27	43.5	37	17	10.5	27
AT1G26100	10.5	26.5	17.5	20.5	17.5	12.5	25	21	11.5	10	12.5	22	14	17	16	11.5	14	17.5	21.5	20.5	18	24.5	1	13.5	22.5	17	18	14.5
AT1G26110	851.5	774	758.5	774.5	690.5	742.5	770	696.5	765.5	783	742.5	625	622.5	780.5	785	742.5	740	737	765.5	878.5	885	722.5	872	827.5	660	821.5	706	698.5
AT1G26120	76.5	60.5	41	72	60	68.5	81.5	79.5	46	47.5	80	80.5	60.5	65.5	65.5	66.5	62	60	70.5	70.5	67.5	48.5	63.5	49	71.5	58	56.5	48.5
AT1G26130	27	22.5	27	30.5	27.5	13.5	28	25	25.5	13.5	54	13.5	17.5	33	24.5	20.5	23.5	22.5	21.5	23.5	32	38.5	38.5	13.5	27.5	31	23.5	22.5
AT1G26150	141	126	124	127.5	100.5	165	152	149	94	148	164	119.5	85	112	115	119.5	150	170.5	155	114	158.5	131.5	114.5	59	143.5	116.5	103	103
AT1G26160	59.5	31	47.5	44.5	41.5	49.5	55	40.5	50	76	66.5	50.5	48.5	51.5	49.5	43.5	54	54	46.5	59.5	45.5	53	51	37.5	46.5	42.5	54	35
AT1G26170	87	72	97	95	112	100.5	85	92	112	91	71.5	119.5	63.5	88.5	89	78.5	93	106	106	98	113	87	77	61	32	79	56.5	100.5
AT1G26180	10.5	36	11	19.5	18.5	25	26	19	15.5	30	7	55	18.5	15	11.5	17	19	19	18	19.5	20	16.5	27	11.5	0	21.5	8	24.5
AT1G26190	74.5	42.5	63.5	41	48.5	44.5	56.5	40.5	53	26.5	31	43	35	45.5	45	47.5	62	51.5	58	42.5	48.5	44.5	1	65.5	61.5	92	91	70.5
AT1G26200	10.5	13.5	0	4.5	3.5	4.5	2.5	0	4.5	7	3.5	0	1.5	0	2.5	7.5	4.5	8	4.5	1	1	3	1	9.5	18	10.5	15.5	5
AT1G26208	3.5	0	0	4.5	2.5	1	0	2	5.5	1	3.5	6	0	2	0	0	0	1	0	7	2	0	1	2.5	0	3.5	0	3
AT1G26218	2.5	2.5	0	2.5	4.5	1	4	11	2	1	10	0	7	1	4	2.5	3	3.5	2	2.5	2	3	1	6	0	0	8	3
AT1G26230	0	6	6.5	7	3.5	2.5	1.5	27	3	1	7	0	3.5	0	1	6	4.5	6	1	6	2.5	3.5	1	4.5	27.5	3.5	0	12.5
AT1G26240	27	45	34	3.5	1.5	0	4	19	8	7	28	35	1.5	1	0	13.5	7	12.5	11.5	1	4.5	0	1	11.5	0	8	5.5	14.5
AT1G26260	37.5	31	17.5	17.5	15	16	22.5	16.5	16.5	30	31	26	21	18.5	22.5	19	4.5	36.5	25	18	26.5	17	27	25.5	51.5	29	26	33
AT1G26270	166.5	200	109	167.5	168.5	177	217.5	161	138	116.5	200.5	204	116	131.5	138	136.5	136	141	138.5	165.5	170.5	176	63.5	168.5	113	131.5	129.5	197
AT1G26300	54	56	24.5	51	56	49.5	60	46.5	51.5	44	54	35	48	51.5	54	37.5	25.5	47	33	41.5	43.5	37	77	53	22.5	36.5	29	35
AT1G26330	6.5	6	8.5	13.5	7	17	12.5	19	6.5	10	15	22	7	5.5	16.5	10.5	12.5	12.5	10.5	19	11	11.5	1	9.5	0	3.5	48	22.5
AT1G26340	39.5	31	38.5	53	46.5	44.5	27.5	29	40.5	23.5	56	43	58	42.5	40.5	50.5	55	48.5	63.5	56	38.5	38.5	38.5	23.5	22.5	51.5	59.5	54
AT1G26370	62.5	56	79.5	73.5	78.5	86	80.5	42.5	62.5	123.5	59.5	97.5	47.5	69.5	83.5	80	67.5	85.5	59.5	66	75	61	256	71.5	66.5	94	56.5	83
AT1G26380	27	15	24.5	5	12.5	2.5	3.5	12.5	6.5	10	3.5	47	0	0	6	6	14	12.5	14.5	14	9.5	9	1	13.5	5.5	14	0	24.5
AT1G26390	84	79	129.5	32	27.5	8	44	83.5	46	65.5	106.5	128.5	8	10.5	9	54	12.5	40.5	45.5	37	25.5	42.5	51	89.5	37	42.5	13	54
AT1G26410	6.5	10.5	13.5	6	2.5	0	6	11	11.5	1	10	10	1	0	2	3.5	6	9	10.5	6	8	2.5	15.5	0	0	17	5.5	12.5
AT1G26420	9.5	6	8.5	5.5	6	2.5	2.5	9	5.5	37	3.5	6	2	6	1	10.5	7	7	7	10	1	15.5	1	13.5	18	10.5	3.5	5
AT1G26440	234.5	162	147.5	127.5	125	101	115.5	111.5	137	109	162	225	178	136	171.5	203.5	130.5	163.5	206	133	150	162	226	165.5	122.5	156	77	197
AT1G26450	79.5	52	59	217	213.5	283.5	205	147	116.5	222.5	85.5	89	144	127	128.5	102.5	119.5	116.5	106.5	200.5	175	190.5	226	125	56	105	157	95
AT1G26460	126	135	165	178.5	164	215.5	155.5	182.5	141.5	151.5	112	123.5	139.5	187	175	175.5	143.5	156.5	168.5	180.5	239.5	181	209.5	122.5	128.5	174.5	224	162
AT1G26470	32	40.5	43.5	51	60.5	55	59	42.5	59	55	12.5	62.5	72.5	51.5	57	55	65.5	52	60.5	46.5	57	55	38.5	59	32	61	50.5	38
AT1G26520	21.5	26.5	15.5	31	18.5	25	31	34.5	19	7	17.5	22	25.5	26.5	26.5	29	32	29.5	31	26	17	20	27	15.5	71.5	24.5	32	7
AT1G26530	6.5	4.5	9	3.5	2.5	2.5	4	0	2	10	5	0	2.5	3.5	5.5	1.5	1.5	4.5	5.5	3.5	0	0	1	0	18	2.5	3.5	3
AT1G26540	1	0	0	2	2.5	2.5	5.5	3.5	0	1	0	0	2.5	0	1	2	0	1	2	1	1.5	0	15.5	4.5	13.5	5	0	5
AT1G26550	230	162	214.5	286.5	259	284	306.5	253	216	175.5	200.5	356	335	235	270.5	307.5	247	301.5	275	274	275	292	209.5	260	179.5	246	181	242.5
AT1G26560	3.5	8.5	0	10.5	7	4.5	4	3.5	11.5	7	10	0	2.5	3	4.5	5	0	2	1	7	10	9.5	1	6	9.5	3.5	0	0
AT1G26570	1	6	0	2.5	1.5	6	0	9	2	1	7	0	3.5	2	5.5	3.5	0	5	2.5	3.5	8	4.5	1	0	0	2.5	8	0
AT1G26580	276	273	260	221.5	234.5	251	225	240	251.5	238.5	238.5	234	230	226	255.5	222.5	354	281.5	243.5	231	245	282.5	226	266.5	272	252	200.5	257
AT1G26590	6.5	0	4.5	3.5	2	3.5	1.5	2	1	1	7	0	1.5	5.5	1	3.5	3	1	6	1.5	3.5	3.5	27	0	0	3.5	0	17
AT1G26620	24.5	47.5	39	75	66.5	50.5	55	44.5	33	34	15	66.5	40.5	46.5	50.5	39	35	39.5	38	61.5	45.5	50.5	1	34	41.5	56	65.5	35
AT1G26630	1647.5	1575.5	1738	1526	1442.5	1655.5	1744	1647.5	1613	1577	1709.5	1570	1977	1627	1779.5	1827.5	1912.5	2367	1929.5	1665.5	1838.5	1486.5	2052.5	1701	1793	1844	1647.5	1738
AT1G26640	124	91.5	107	98.5	99	78	86.5	82	88.5	61.5	91	106.5	85	79	107	102	96	110	97	93.5	90	79	27	117.5	102	79	88	97.5
AT1G26650	27	47.5	63.5	37.5	43.5	50.5	43.5	62	68	40.5	54	93	44.5	26.5	29	43.5	50	37.5	49.5	40.5	41.5	64.5	27	55	51.5	50	48	38
AT1G26660	19.5	26.5	41	23.5	11.5	18.5	27.5	12.5	15.5	7	12.5	13.5	24	24.5	13.5	17	15.5	27	17	11.5	23.5	18.5	38.5	43.5	22.5	24.5	23.5	46
AT1G26665	49.5	91.5	68.5	83	83	69.5	91	77.5	79.5	80	82.5	62.5	94	66.5	67.5	94	65.5	76.5	67.5	90.5	89.5	86	15.5	97.5	102	87	57	51
AT1G26670	156	205	146	170.5	212	150.5	186	244.5	169.5	218.5	146	243	217.5	138.5	164	218	145	172.5	136	156.5	148.5	189	154	154	154	187	100	159
AT1G26680	9.5	10.5	27	12.5	11.5	4.5	14.5	12.5	10.5	13.5	3.5	0	15	15	9	5.5	7	15	17	10	10	7	1	6	22.5	14	8	19.5
AT1G26690	78	67.5	84.5	69.5	89	69.5	68.5	130.5	78	105.5	126	123.5	85.5	59.5	74.5	70.5	62	66.5	76.5	69.5	75	63.5	114.5	45.5	122.5	69.5	40.5	95
AT1G26700	18	4.5	39	18.5	8	13.5	9	38.5	15.5	34	10	10	8	7	6	6	10.5	16	13.5	8	18.5	16.5	1	15.5	18	17	13	3
AT1G26730	13.5	17	24.5	30	23.5	49.5	18	7	26.5	47.5	17.5	0	9.5	13.5	9	7.5	23.5	19	10	21.5	29	38	15.5	11.5	9.5	6.5	10.5	0
AT1G26740	32	40.5	57	48	41.5	67.5	49	52.5	57.5	80	69.5	31	58.5	68.5	59	53	72.5	61.5	43.5	46.5	60.5	36	154	29	18	43.5	50.5	38
AT1G26750	21.5	19.5	34	50	58	50.5	56.5	21	46	10	41	66.5	67.5	52.5	50	51.5	65.5	74	59.5	52	56	38.5	51	47.5	27.5	35	62.5	43.5
AT1G26760	3.5	2.5	15.5	6	7	18.5	17	2	4.5	1	10	39	3.5	8.5	10.5	4.5	7	4.5	8.5	6	6	11.5	1	8	5.5	5	3.5	0
AT1G26770	25.5	10.5	17.5	57	58	68.5	33.5	40.5	44.5	51	20.5	13.5	33.5	35	27.5	31	14	27.5	24.5	38.5	33	36	89	41.5	22.5	10.5	21	14.5
AT1G26790	0	0	0	1	2.5	0	5	2	2	1	3.5	0	0	1	2	7.5	0	0	0	2.5	1.5	0	27	0	0	0	0	3
AT1G26800	24.5	4.5	9	15.5	17.5	14.5	30	27	16.5	10	25.5	18	21	16.5	15	23.5	17	19.5	9.5	17	20.5	23.5	38.5	8	5.5	23.5	10.5	24.5
AT1G26810	15	22.5	39	21	20.5	18.5	18.5	31	15.5	10	7	18	22.5	11.5	20.5	25.5	23.5	11.5	30	19.5	18.5	24.5	27	13.5	13.5	35	29	9.5
AT1G26820	64	60.5	61.5	64	79	52	56.5	76	78	119.5	69.5	115	74	67.5	47	40.5	37	26	24.5	71.5	76	66.5	77	83	42	61	85.5	43.5
AT1G26830	239.5	225	241.5	209	267.5	187	209	171.5	200	257.5	251.5	165	195.5	241	223.5	218.5	201	206.5	206.5	213.5	182	215.5	226	198	226	243	194.5	172.5
AT1G26840	21.5	24.5	13.5	13.5	20.5	13.5	13.5	23.5	14	20	31	43.5	14	12.5	19	16	17	11.5	14.5	10.5	19.5	18.5	27	27.5	18	26	37.5	9.5
AT1G26850	916.5	783.5	957.5	924.5	859	964.5	831.5	814.5	940.5	844	924.5	706.5	693	805	730.5	783	819.5	765.5	842	901.5	927	975.5	762	853	842	878.5	947.5	928
AT1G26870	0	6	0	1	2	0	2.5	0	3	1	5	10	1	1	4	1	0	3.5	2.5	2.5	1	1	1	0	9.5	0	3.5	0
AT1G26880	233.5	287	389.5	397	382.5	408.5	469	346.5	429	522.5	382.5	239.5	491.5	357.5	378.5	438	404.5	519	434	356	362.5	346	209.5	243	406.5	394	442	340
AT1G26890	2.5	2.5	0	0	2.5	2.5	5	3.5	3	10	0	6	2.5	3	4.5	1.5	1.5	4.5	1	0	2.5	1.5	1	2.5	0	6.5	0	0
AT1G26900	27	22.5	6.5	27	19	12.5	26.5	25	16.5	13.5	10	39	24.5	23.5	27.5	27.5	20.5	32	28	20.5	20.5	34	27	35.5	42	38	71.5	30
AT1G26910	55	20	90	78	58	90	77.5	76	61.5	47.5	51.5	50.5	122.5	66.5	93	94	87	107.5	78.5	74.5	70.5	64.5	27	67.5	66.5	66.5	42.5	48.5
AT1G26920	107.5	94	77	147.5	127	128.5	70.5	115.5	105	182.5	126	142.5	147.5	144	117.5	118.5	115	107	106	131	152	114	77	140	71.5	107	82.5	126
AT1G26930	70.5	67.5	121.5	150.5	142.5	161	112.5	102	115	76	162	102	111	115	93	88	110.5	88	90	115	153	130	168.5	114	133.5	105	85.5	106
AT1G26940	32	58.5	57	33	41.5	34.5	40.5	67.5	40.5	84	49	62.5	57.5	46.5	51.5	51	54	46.5	53	44.5	62.5	44.5	27	63.5	32	38	79.5	38
AT1G26945	21.5	15	15.5	26.5	11.5	28	22.5	5.5	8	20	25.5	31	12.5	12.5	11.5	15.5	7	13.5	8	9.5	11	9.5	1	19.5	18	8	26	9.5
AT1G26960	67.5	74.5	65.5	46.5	50.5	49.5	45.5	82	54	40.5	74	102	64	52.5	61	71.5	80	51.5	53.5	47.5	36	49.5	89	45.5	46.5	43.5	37.5	56
AT1G26970	22.5	13.5	24.5	20.5	15.5	12.5	20.5	29	30.5	26.5	25.5	31	19.5	16	24.5	35	20.5	24.5	24.5	29	28.5	21	1	27.5	28	6.5	37.5	14.5
AT1G27000	186.5	162	220.5	243	227.5	209	179	253	234.5	212	187	220.5	272	219.5	246	217.5	210	219.5	200	200	212.5	205	197	243	164	208.5	181	220.5
AT1G27020	57	29	39	10.5	13.5	8	18.5	25	10.5	51	15	35	21.5	10.5	18.5	31	10.5	17.5	21.5	15.5	16	13.5	27	23.5	42	26	15.5	35
AT1G27030	607.5	540	640	455.5	587	646.5	466	558.5	532	462.5	627	488.5	565	514	510	685	584	651	600	523.5	634.5	629.5	519.5	689	586.5	646.5	673	525.5
AT1G27050	46.5	15	32	17.5	28	37	37.5	5.5	19	30	20.5	0	36.5	27	35.5	22.5	14	29.5	26.5	29.5	28.5	21	1	19.5	18	15.5	21	17
[truncated: 17,078 more rows]

## Sheet: DE - HA 
	log2FoldChange	padj
AT1G01110	-0.0246562	0.0430194
AT1G01120	0.00623008	0.0164971
AT1G01190	0.0328847	2.06861e-08
AT1G01240	-0.0138779	0.00536715
AT1G01340	0.0239236	1.21835e-06
AT1G01370	-0.0295123	0.0283907
AT1G01470	-0.032135	7.78529e-23
AT1G01580	0.0292344	0.0177834
AT1G01610	0.0174784	0.00015981
AT1G01715	-0.0290675	0.0414282
AT1G01720	-0.014083	8.02148e-06
AT1G02050	-0.0216755	0.0399954
AT1G02205	-0.0317992	8.50508e-06
AT1G02310	-0.0252731	0.00453496
AT1G02360	0.0195296	0.00327384
AT1G02400	-0.0174387	0.00761484
AT1G02730	-0.0101804	0.00600428
AT1G02810	0.0230538	3.72095e-06
AT1G02850	-0.0201818	7.73083e-14
AT1G02890	0.0106283	0.000109916
AT1G02900	0.0108334	0.0112874
AT1G02920	0.0288831	0.00104682
AT1G03620	-0.0247897	0.0201137
AT1G03700	0.028395	0.00169965
AT1G03840	0.0283024	2.04472e-05
AT1G03870	0.0125919	0.000681847
AT1G03920	0.0155467	0.0181352
AT1G04240	0.0172326	0.000678012
AT1G04250	0.0122471	1.79151e-06
AT1G04280	0.0133882	0.000162683
AT1G04350	0.0377972	0.00175551
AT1G04640	-0.0324498	0.0232866
AT1G05000	0.0339085	1.28327e-10
AT1G05100	-0.0281951	0.0147974
AT1G05570	0.00995282	0.00866841
AT1G05680	-0.0306677	3.32473e-13
AT1G05700	0.0419301	0.00695957
AT1G05810	0.023908	0.0100964
AT1G06040	0.00716528	0.00332797
AT1G06120	0.0525751	0.000818254
AT1G07000	0.0186342	0.0048059
AT1G07430	-0.092911	2.31912e-10
AT1G07560	0.0223858	0.0181352
AT1G07720	-0.0397823	0.000556966
AT1G07740	-0.0601313	0.0110092
AT1G07985	-0.0466129	1.23892e-08
AT1G08090	0.0326612	0.00657548
AT1G08173	0.046743	0.0240266
AT1G08440	-0.064101	0.00162065
AT1G08570	-0.0104444	0.00669443
AT1G08650	0.0130612	0.000256027
AT1G08763	0.0465043	0.0140884
AT1G08830	0.00938556	0.00155557
AT1G08930	0.0172538	0.000433115
AT1G09070	0.00658779	0.0401499
AT1G09090	0.0199602	0.0138962
AT1G09140	0.0072348	0.016967
AT1G09170	0.0192895	0.0152058
AT1G09470	-0.0253614	0.034154
AT1G09605	0.0471408	0.000561868
AT1G09690	-0.00716223	0.00598339
AT1G09850	-0.0134275	0.0140997
AT1G09932	-0.0414717	4.86224e-09
AT1G09970	0.00495918	0.0169917
AT1G10070	0.0227512	0.0218483
AT1G10340	0.0428053	0.043764
AT1G10470	0.0135319	2.56666e-09
AT1G10640	-0.0163023	0.0190362
AT1G10760	-0.014069	1.21624e-07
AT1G10960	0.011793	0.0160907
AT1G11080	0.0137996	0.00227073
AT1G11125	-0.0602817	0.0329656
AT1G11420	-0.0264211	0.00511622
AT1G11580	0.0111015	3.02902e-08
AT1G11670	0.0189813	5.26366e-14
AT1G11840	-0.0137847	1.62075e-11
AT1G12010	0.025773	1.16882e-07
AT1G12040	0.0340141	5.98127e-05
AT1G12080	0.0143081	0.000469756
AT1G12110	0.0213093	1.14245e-06
AT1G12290	0.0212285	0.0300905
AT1G12430	0.0111848	0.0262725
AT1G12500	0.0165469	0.00734008
AT1G12520	0.0145194	0.00723181
AT1G12740	0.0203515	0.00031068
AT1G13110	0.0320146	1.83817e-07
AT1G13210	0.0120294	0.00441376
AT1G13300	0.0178311	6.37827e-07
AT1G13390	0.0128665	0.025612
AT1G13420	0.0185039	0.000599352
AT1G13710	0.0584336	2.54574e-07
AT1G13830	0.0133083	0.0440077
AT1G14120	-0.0153112	1.57042e-08
AT1G14160	0.0394601	3.58772e-05
AT1G14220	0.0204646	0.000194573
AT1G14240	-0.0112643	0.00836699
AT1G14320	-0.00703028	0.00695957
AT1G14520	-0.0251244	0.00633143
AT1G14780	0.0200644	0.0167003
AT1G14870	0.0162425	0.000325253
AT1G14960	0.0223377	0.0275716
AT1G14970	-0.0161321	0.043754
AT1G15100	0.00837695	0.0365583
AT1G15210	0.0106361	1.28493e-05
AT1G15380	0.010231	0.00989172
AT1G15500	0.00734282	0.0047624
AT1G15540	0.0283464	2.31341e-06
AT1G15570	-0.0178575	0.0187029
AT1G15730	0.0312435	0.0381462
AT1G15960	-0.0628756	0.000774394
AT1G16000	-0.0237099	0.00473723
AT1G16180	0.00695715	0.0113918
AT1G16370	0.0429348	0.0021851
AT1G16400	0.0221459	0.000448945
AT1G16500	0.0151965	0.0195313
AT1G16530	0.0169944	0.0323997
AT1G16850	-0.0426927	1.65184e-16
AT1G16870	-0.0101511	0.0275716
AT1G17170	-0.00710678	0.0214767
AT1G17180	-0.0168588	5.29341e-09
AT1G17290	-0.00593114	0.0375663
AT1G17620	0.0101129	0.000597208
AT1G17760	0.00911425	0.0186894
AT1G17830	-0.022728	0.0326659
AT1G18100	-0.0268383	0.0230676
AT1G18270	0.00669612	0.00606903
AT1G18390	0.0173549	0.000242534
AT1G18460	-0.0123205	1.34183e-05
AT1G18540	-0.00865223	0.000463525
AT1G18590	0.015387	0.002524
AT1G18800	-0.00873658	0.0370036
AT1G18880	0.0136012	1.43808e-05
AT1G19050	0.0386546	2.71148e-13
AT1G19450	0.0199186	8.42932e-12
AT1G19570	-0.0118302	1.17638e-07
AT1G19700	0.00869058	0.0410152
AT1G19900	0.0686961	4.23885e-05
AT1G19960	0.0325641	0.0052487
AT1G20160	-0.0139569	9.75726e-05
AT1G20440	-0.012308	1.15059e-08
AT1G20450	-0.0237798	1.63581e-24
AT1G20460	-0.0307483	0.000473736
AT1G20693	0.0149606	1.17612e-07
AT1G20696	0.00728626	0.00822282
AT1G20930	-0.0168356	0.00490116
AT1G21100	0.0158983	0.0363819
AT1G21110	0.0262022	3.40243e-05
AT1G21450	0.00833889	0.00750432
AT1G21650	-0.020393	0.0186894
AT1G21750	-0.00541967	0.034154
AT1G22030	0.0224382	0.000826696
AT1G22220	0.0223272	0.000800613
AT1G22230	0.0147085	0.0202648
AT1G22330	0.0222409	0.0248387
AT1G22510	-0.0223143	0.0492863
AT1G22530	0.0194802	2.92245e-15
AT1G22710	-0.0173945	0.000176757
AT1G23030	0.0136477	0.000109116
AT1G23140	0.0255648	0.0179397
AT1G23190	-0.0122543	2.46347e-10
AT1G23200	-0.0241037	0.0130563
AT1G23205	0.0322738	0.0472565
AT1G23380	-0.0159711	0.0248164
AT1G23720	0.0200931	8.19223e-06
AT1G23730	-0.0541624	0.0278824
AT1G24100	0.0125441	0.00646726
AT1G24510	-0.00565249	0.0401499
AT1G25230	0.0166678	8.67478e-05
AT1G25275	-0.0119857	0.0405592
AT1G25480	0.0147399	0.0196879
AT1G25530	-0.0126943	0.0146287
AT1G25550	0.020553	2.08825e-16
AT1G25560	0.0211891	0.000235127
AT1G26240	0.0615611	4.62733e-07
AT1G26390	0.0341061	4.05449e-05
AT1G26440	0.011847	0.00908287
AT1G26450	-0.0270479	4.25507e-06
AT1G26770	-0.0266766	5.61016e-05
AT1G26930	-0.0110389	0.040337
AT1G27020	0.0319212	6.63183e-05
AT1G27210	0.023791	6.37827e-07
AT1G27330	-0.0102281	0.00218183
AT1G27350	-0.013052	0.0088665
AT1G27450	-0.00958863	0.000932407
AT1G27950	-0.018544	0.000897302
AT1G28110	-0.0135793	0.0288081
AT1G28290	-0.00988813	4.8714e-05
AT1G28440	0.0160267	1.1206e-10
AT1G28660	0.0258923	0.0289936
AT1G29025	0.0203219	0.000938744
AT1G29395	-0.0495832	0.00280556
AT1G29750	-0.0178042	0.0111782
AT1G29860	-0.0571688	0.000297647
AT1G29910	0.0263382	0.000147021
AT1G30080	-0.0154868	0.044831
AT1G30330	0.0106303	0.000272025
AT1G30370	0.0259953	0.0109756
AT1G30500	0.0213303	0.0280711
AT1G30580	-0.00677795	0.00836699
AT1G30620	-0.0133036	0.0036446
AT1G30680	-0.0235125	0.00401006
AT1G30820	-0.0179542	1.13926e-06
AT1G30870	0.0181446	0.00280556
AT1G30900	0.0132839	0.0184624
AT1G31600	0.00911822	0.049731
AT1G31935	0.0262376	2.03182e-05
AT1G32230	0.00754925	5.39803e-05
AT1G32380	-0.0147346	0.0164689
AT1G32450	0.0178976	4.17149e-05
AT1G32870	-0.0224746	0.0038685
AT1G33040	-0.0128739	0.00641501
AT1G33140	-0.0074347	0.00841122
AT1G33240	0.0101255	0.0339917
AT1G33260	0.0173333	0.0444038
AT1G33700	-0.0183806	3.26616e-06
AT1G33990	-0.00834669	0.0425472
AT1G34315	0.0199451	0.0113234
AT1G34750	0.013677	0.010599
AT1G35255	-0.0481107	0.0278915
AT1G35330	0.0220298	0.0223265
AT1G35350	0.0466676	0.000473736
AT1G35515	0.0211711	0.00142173
AT1G35720	-0.00876417	2.46347e-10
AT1G36070	0.0129071	0.0365777
AT1G36160	0.00683295	0.000313521
AT1G37130	-0.00653167	0.0280036
AT1G41880	-0.00873005	0.00385633
AT1G42970	0.0190361	0.00568304
AT1G43170	-0.00758558	0.02842
AT1G44100	0.00922619	0.0295327
AT1G44790	-0.0134661	0.0360878
AT1G45130	-0.00627355	0.00388513
AT1G45249	-0.0113615	4.00716e-05
AT1G47310	0.0118978	0.0428916
AT1G47510	-0.0369343	0.000628337
AT1G47600	0.0224973	3.12208e-05
AT1G47710	-0.0134998	0.00029738
AT1G47960	-0.0376004	1.12647e-05
AT1G48030	-0.00889061	0.00405253
AT1G48100	-0.0328293	5.83004e-05
AT1G48300	0.00813019	0.0265575
AT1G48480	0.010457	0.00824805
AT1G48660	-0.0562166	0.0142234
AT1G48930	0.0242909	0.0012893
AT1G49240	0.00652371	0.0359644
AT1G49320	0.0167818	0.00189179
AT1G49380	-0.0314095	0.0429246
AT1G49450	-0.0138461	0.0250478
AT1G49750	0.0281881	0.0227193
AT1G49860	0.0386634	6.10032e-15
AT1G51060	0.00869146	0.0226079
AT1G51140	-0.0109458	0.00015981
AT1G51200	0.00862211	0.00719656
AT1G51270	0.0176728	0.00564045
AT1G51340	0.0209837	0.000442841
AT1G51470	0.0215529	1.01194e-06
AT1G51500	-0.0194867	0.0157831
AT1G51570	-0.00924696	0.0367236
AT1G51790	0.028127	0.00677482
AT1G51830	0.0233138	0.000167937
AT1G51840	0.0173034	0.0401499
AT1G51850	0.026417	4.3096e-07
AT1G51860	0.0268184	0.000161797
AT1G51890	0.038719	2.33128e-09
AT1G52070	0.0126268	0.00149481
AT1G52100	-0.0472965	0.000634603
AT1G52140	0.0132081	0.0278293
AT1G52150	0.00728144	0.0272454
AT1G52200	0.0325365	9.96834e-05
AT1G52400	-0.0477465	2.24151e-09
AT1G52410	-0.0161436	0.00598801
AT1G52560	-0.0344687	2.71676e-05
AT1G52690	-0.0504558	4.83626e-09
AT1G52730	-0.0134503	0.0100034
AT1G52800	0.0255833	0.000482533
AT1G52820	0.0225068	0.00311774
AT1G52980	-0.00758421	0.048442
AT1G53060	-0.0450559	0.0307758
AT1G53240	-0.00517878	0.0151169
AT1G53430	0.0164589	1.30379e-05
AT1G53470	-0.0203656	6.87737e-08
AT1G53750	-0.00561696	0.0210366
AT1G53790	-0.0319929	0.00015981
AT1G53830	0.0228553	4.30332e-06
AT1G53940	0.0505826	0.00107941
AT1G54095	0.0390956	0.000254866
AT1G54100	-0.011414	1.71833e-11
AT1G54160	-0.069943	0.00586875
AT1G54220	-0.0121414	0.0207069
AT1G54410	-0.00782748	0.00228553
AT1G54575	-0.0272209	4.13869e-05
AT1G54830	-0.0181637	0.0038607
AT1G55360	0.01029	0.046934
AT1G55420	0.0289068	0.0404363
AT1G55430	0.0281511	0.0154734
AT1G55520	0.01173	0.0444038
AT1G55740	-0.0129704	1.53063e-06
AT1G55840	-0.0123553	0.00286314
AT1G55920	-0.0126843	0.00172108
AT1G55990	0.0221653	1.1837e-07
AT1G56045	-0.0151615	0.000114441
AT1G56220	-0.00975353	0.00182567
AT1G56340	-0.00826786	0.0270622
AT1G56600	-0.0894382	4.0466e-24
AT1G57980	0.0362703	0.00558907
AT1G58037	0.0316781	0.014469
AT1G58270	-0.0111646	9.26088e-06
AT1G58280	0.0114443	0.0412036
AT1G58320	0.0224437	0.000490285
AT1G58360	-0.0167394	0.000356494
AT1G59590	0.0211768	0.0228493
AT1G59620	-0.0325609	0.0420752
AT1G59870	0.0111128	0.00175388
AT1G59960	-0.0104121	0.0132334
AT1G60190	-0.043228	7.53385e-12
AT1G60200	0.00826079	0.00257671
AT1G60470	-0.0469487	1.16058e-50
AT1G60590	-0.0380555	0.00877515
AT1G61340	-0.0391867	0.000143121
AT1G61560	0.0302457	0.0195304
AT1G61590	0.0136759	0.0257977
AT1G61890	-0.0129376	0.00990127
AT1G62290	-0.0439575	0.0299948
AT1G62300	-0.0103832	0.0227681
AT1G62380	0.0112698	4.18887e-06
AT1G62540	-0.0199656	0.000120461
AT1G62570	-0.0237415	3.97393e-35
AT1G62640	0.00892714	0.0190362
AT1G62710	-0.0107715	0.0118108
AT1G62800	0.00823478	0.0316191
AT1G62975	0.0205159	7.32953e-09
AT1G63000	0.0056905	0.0256721
AT1G63010	-0.00996033	0.000654731
AT1G63450	0.0287945	0.00917887
AT1G64000	0.0185524	0.0166045
AT1G64110	-0.0394533	1.70998e-10
AT1G64140	0.00660298	0.0249892
AT1G64280	0.016297	0.00331038
AT1G64530	0.0140005	7.2651e-06
AT1G64590	0.0255999	2.06142e-32
AT1G64670	-0.0311445	0.031902
AT1G64750	-0.0082459	0.047774
AT1G64760	-0.0214713	0.0447549
AT1G64780	0.0244293	2.7493e-16
AT1G64880	-0.0167918	0.000233883
AT1G64910	0.0467165	0.00117314
AT1G65310	0.036796	8.87212e-07
AT1G65484	0.0736181	0.00893818
AT1G65590	0.0100507	0.021916
AT1G65840	0.011681	0.000119699
AT1G65845	0.0330268	5.65007e-06
AT1G65960	0.00843099	0.00187124
AT1G65970	0.0469063	0.00667586
AT1G65985	0.0196203	0.026806
AT1G66190	0.0197274	0.016299
AT1G66200	0.0156488	0.035563
AT1G66280	-0.00649334	0.0144682
AT1G66440	0.0560996	0.0386109
AT1G66580	-0.00695999	5.9457e-05
AT1G66760	-0.0149774	0.000170182
AT1G66830	-0.0466423	0.00907565
AT1G66980	0.0716381	0.00286482
AT1G67110	0.0443452	2.71522e-15
AT1G67148	0.0337898	7.35206e-05
AT1G67430	-0.00681014	0.0106394
AT1G67730	0.00861952	0.0047122
AT1G67810	0.0202594	0.00226711
AT1G67870	0.0153089	9.75237e-06
AT1G67980	0.0468085	2.41472e-08
AT1G68040	0.0264917	0.000103079
AT1G68150	0.019454	0.0187029
AT1G68530	-0.0241024	0.000159051
AT1G68560	-0.0098187	0.00475657
AT1G68620	0.019782	6.31127e-06
AT1G68670	0.0218026	5.97321e-10
AT1G68850	0.0149019	0.000260062
AT1G68880	-0.0154294	0.0146958
AT1G69240	0.0285729	0.0169745
AT1G69260	-0.034665	2.35762e-18
AT1G69295	-0.00968393	0.000717255
AT1G69410	-0.00862258	0.00226711
AT1G69480	-0.0286426	0.000673973
AT1G69510	-0.00554615	0.0153846
AT1G69530	-0.0280785	8.53083e-16
AT1G69810	0.0212969	0.0026505
AT1G69880	-0.0462459	1.15743e-09
AT1G70280	-0.0128152	0.0412192
AT1G70410	0.0140058	0.00640505
AT1G70600	-0.00809082	0.0137233
AT1G70710	-0.0116575	0.0114454
AT1G70730	-0.00802772	0.0107567
AT1G70740	0.0198152	0.000204605
AT1G70850	-0.00504687	0.0100277
AT1G71380	-0.0386147	0.0270622
AT1G71870	0.00989335	0.0485602
AT1G71880	0.0285264	2.65933e-12
AT1G72020	-0.00608834	0.0360363
AT1G72130	0.0107951	0.000678012
AT1G72150	0.0119343	0.000188886
AT1G72160	0.00771252	0.00631812
AT1G72300	0.0137316	0.00217244
AT1G72310	0.0117522	0.0214014
AT1G72430	0.0217522	0.00150335
AT1G72450	0.0214623	0.0488616
AT1G72500	0.0125334	7.0549e-05
AT1G72680	-0.0163264	6.02081e-08
AT1G72770	-0.0150007	5.48079e-07
AT1G72890	0.0388676	0.00187124
AT1G72970	-0.0186474	0.0171321
AT1G73010	0.0271405	0.0280036
AT1G73260	0.0186893	2.68552e-11
AT1G73270	0.0259057	0.0417975
AT1G73280	0.0339385	0.000107899
AT1G73290	0.0275662	0.00195044
AT1G73300	0.0379752	0.00603415
AT1G73390	-0.0125991	0.0222364
AT1G73480	-0.0268615	4.71289e-21
AT1G73600	0.0133099	0.00103553
AT1G73650	0.0103155	0.00834479
AT1G73880	-0.017067	0.0201358
AT1G73920	-0.0145924	2.36268e-10
AT1G73940	-0.00993018	0.0288253
AT1G74030	-0.00667012	0.0131709
AT1G74100	0.00985664	0.0306527
AT1G74458	0.0103915	0.0423655
AT1G74460	0.0121823	0.000270735
AT1G74560	-0.0102389	0.0193935
AT1G75040	0.100925	0.00179877
AT1G75090	-0.062277	0.00487813
AT1G75170	-0.00975451	0.0196879
AT1G75280	-0.0130147	2.87482e-07
AT1G75330	-0.0107878	0.000185389
AT1G75440	0.0216964	0.0455051
AT1G75540	0.00891008	0.000145712
AT1G75680	0.00685319	0.0102259
AT1G75750	0.0247778	1.97602e-21
AT1G75850	0.0075544	0.0278824
AT1G75900	-0.0366735	0.031026
AT1G76070	0.0289842	0.0461671
AT1G76090	0.0107296	0.016299
AT1G76180	-0.00808022	0.0171295
AT1G76200	-0.0101303	0.000258182
AT1G76240	0.0126597	0.02749
AT1G76310	-0.0176076	0.024282
AT1G76490	0.00517358	0.00370203
AT1G76510	-0.0132685	0.0206167
AT1G76690	-0.00723213	0.0395516
AT1G76720	0.0271711	0.0205251
AT1G76800	-0.017473	0.00699764
AT1G76930	-0.0142331	2.53754e-06
AT1G76952	0.0205964	0.041772
AT1G76990	0.0180236	3.02902e-08
AT1G77120	-0.0448847	5.07675e-24
AT1G77260	0.0100296	0.0115661
AT1G77450	-0.0177761	3.11158e-08
AT1G77510	-0.00899337	0.00157756
AT1G77520	0.00988889	0.0122297
AT1G77530	0.0281694	6.42148e-08
AT1G77690	0.0150321	1.3139e-07
AT1G77885	0.0187063	0.000202334
AT1G77940	-0.0079196	0.00173606
AT1G78000	0.0140991	0.0105015
AT1G78020	0.0289126	4.5118e-07
AT1G78070	-0.0110927	0.00569183
AT1G78080	0.00684829	0.0410152
AT1G78120	0.0137308	0.000456131
AT1G78260	0.0192181	8.45781e-05
AT1G78290	0.0163852	0.00014884
AT1G78360	0.0514354	0.0302296
AT1G78440	0.0353539	0.000333213
AT1G78580	0.00600213	0.0168829
AT1G78610	-0.0112793	0.026806
AT1G78670	0.00779944	0.0147184
AT1G78830	0.0111868	0.00593627
AT1G78850	0.0130474	0.000202334
AT1G78860	0.020459	0.00762851
AT1G78990	0.019071	1.10854e-05
AT1G79380	0.00921902	0.00607359
AT1G79520	-0.0221997	3.88549e-12
AT1G79820	-0.0133685	0.0265058
AT1G80070	-0.00503468	0.012126
AT1G80110	-0.0246012	0.00618771
AT1G80160	-0.0429449	0.0187863
AT1G80180	0.0158533	0.001739
AT1G80920	0.00822723	0.00973903
AT2G01180	0.0172026	0.0159487
AT2G01190	0.015152	3.13747e-05
AT2G01250	-0.00734358	0.0110061
AT2G01260	0.0115551	0.0166999
AT2G01580	0.0215321	0.0368552
AT2G01610	-0.0230184	0.000964584
AT2G01830	0.00973748	0.000327404
AT2G01910	0.0103567	7.41107e-05
AT2G01950	0.0167876	4.62733e-07
AT2G02100	-0.0191221	1.68855e-14
AT2G02120	-0.0247331	1.05581e-07
AT2G02160	-0.00770383	0.0468132
AT2G02800	0.0135589	6.08089e-07
AT2G02960	0.00926564	0.035486
AT2G03440	0.010805	0.00702036
AT2G03500	-0.0318363	0.00372885
AT2G03730	0.01767	1.26281e-10
AT2G04070	0.0690981	1.11686e-05
AT2G04350	-0.00749297	0.00401556
AT2G04430	0.0191316	0.0167573
AT2G04780	0.00959115	0.0235891
AT2G05440	-0.0176427	1.79416e-12
AT2G05510	-0.0355497	6.10482e-27
AT2G05790	-0.00814497	0.0335446
AT2G07180	0.0147455	0.00150174
AT2G11225	0.00680854	0.000864879
AT2G13360	0.0195457	1.99563e-05
AT2G13810	0.036612	0.000485642
AT2G14510	0.038281	0.0236838
AT2G14750	0.0150185	3.15887e-09
AT2G14878	0.00725168	0.016299
AT2G15370	0.0272297	0.00142337
AT2G15480	-0.0131036	0.017739
AT2G15620	-0.00986614	0.000219656
AT2G15960	-0.0347458	0.0151321
AT2G15970	-0.0125194	4.96328e-13
AT2G16005	-0.0178201	1.92943e-06
AT2G16060	-0.0195215	0.00561019
AT2G16600	-0.00946079	1.77654e-06
AT2G16630	-0.0342095	0.0100154
AT2G16700	-0.0138582	0.043754
AT2G16710	-0.0180847	0.0480218
AT2G16750	0.0205555	1.4441e-06
AT2G16760	0.0153357	0.00603421
AT2G16890	-0.0130319	0.00896885
AT2G16980	0.023326	5.68059e-09
AT2G17430	0.0267241	0.000269045
AT2G17500	0.00718408	0.0210362
AT2G17820	0.0161886	6.40712e-08
AT2G18020	-0.00715667	0.0151685
AT2G18150	-0.0217456	6.14381e-22
AT2G18193	-0.0154345	0.0339177
AT2G18360	-0.0182056	6.45357e-07
AT2G18370	-0.0115068	2.09802e-05
AT2G18390	-0.0173289	0.0036813
AT2G18590	-0.0869804	0.000966286
AT2G18700	-0.0153627	0.002385
AT2G18800	0.018871	0.000810249
AT2G18960	0.00519841	0.00034152
AT2G19050	0.043646	0.0296684
AT2G19620	0.0194261	0.0139095
AT2G19730	-0.00599737	0.0123426
AT2G19800	-0.0244118	0.000473736
AT2G19900	-0.0384161	9.60199e-06
AT2G20050	-0.0104193	0.0256721
AT2G20080	0.0209211	5.42948e-05
AT2G20230	0.0126046	1.69463e-05
AT2G20610	0.00950121	0.0469504
AT2G20670	0.0141035	0.00533954
AT2G21045	0.0116713	0.0410411
AT2G21250	-0.0104785	0.00339637
AT2G21550	0.0178563	0.0408617
AT2G21560	0.0130469	0.00599686
AT2G21880	0.0272443	0.019142
AT2G22240	-0.00954232	0.018763
AT2G22330	0.0159769	5.98127e-05
AT2G22430	-0.0114486	1.16821e-05
AT2G22470	0.00762267	0.0454951
AT2G22510	0.0166735	3.83742e-07
AT2G22560	-0.014323	0.0162976
AT2G22980	0.0394099	0.0122039
AT2G22990	0.0368745	0.0032064
AT2G23120	-0.0144444	1.48229e-10
AT2G23380	-0.00858753	0.0388686
AT2G23540	0.00996528	0.000671772
AT2G23610	-0.0144277	5.22665e-05
AT2G23770	0.0325309	0.0076222
AT2G23910	0.0219244	5.86801e-05
AT2G24580	0.0126046	0.0365309
AT2G24720	0.0599153	4.00557e-05
AT2G24980	0.0424784	0.0218483
AT2G25060	-0.011053	0.048442
AT2G25150	0.0224438	0.00211257
AT2G25160	0.0158292	2.72506e-10
AT2G25260	0.00982644	0.0378442
AT2G25450	-0.00797556	1.10422e-08
AT2G25490	0.00817974	0.000346466
AT2G25620	-0.012274	0.0301449
AT2G25625	-0.0294986	0.023046
AT2G26210	0.0113262	0.0168149
AT2G26480	0.0212432	0.00837954
AT2G26530	0.0293418	0.000736973
AT2G26560	0.0312251	0.00895888
AT2G26660	0.0121156	0.012619
AT2G26690	-0.0196712	3.97277e-05
AT2G27020	-0.00912485	0.0174652
AT2G27040	-0.0107574	0.00533111
AT2G27230	-0.00791094	0.0363819
AT2G27402	0.0270919	0.046402
AT2G27510	-0.00770622	0.00249354
AT2G27530	-0.00840652	0.000319835
AT2G27550	-0.0203202	0.00458969
AT2G27660	0.0310818	0.000517854
AT2G27730	-0.00725318	0.0224422
AT2G27960	0.0114229	0.0196957
AT2G28250	0.0172087	4.37549e-07
AT2G28350	0.0110823	0.0300905
AT2G28410	0.0178282	0.0277954
AT2G28470	0.0255044	5.62423e-23
AT2G28720	0.0235652	0.000826568
AT2G28900	-0.0196584	0.00189179
AT2G28950	-0.0149384	0.0225624
AT2G28960	0.0381039	2.13854e-09
AT2G28970	0.0363506	0.000305442
AT2G29140	-0.00904858	0.015788
AT2G29350	0.0321099	2.34851e-05
AT2G29380	-0.0569989	1.79482e-07
AT2G29460	-0.0251905	0.00446643
AT2G29490	-0.00780197	0.00640875
AT2G29500	-0.0192577	0.00918103
AT2G29530	-0.0210509	0.0268691
AT2G29580	-0.0197139	0.00954412
AT2G29660	0.0252224	2.41875e-13
AT2G29750	0.020247	5.49149e-07
AT2G29980	-0.00723938	0.0306292
AT2G30140	-0.0224058	1.60684e-08
AT2G30210	0.010348	6.74286e-06
AT2G30520	0.0100398	8.54918e-07
AT2G30620	0.00856419	0.0277797
AT2G30740	0.0116416	0.000807701
AT2G30750	0.0231958	0.00103082
AT2G30930	0.0170573	4.99192e-09
AT2G31020	0.0196483	0.00021938
AT2G31610	-0.00652477	0.021192
AT2G32060	-0.00656616	0.0145862
AT2G32150	0.00837685	0.0360363
AT2G32170	-0.00866976	0.0464797
AT2G32700	0.00661778	0.0101786
AT2G32810	-0.0091415	0.0395516
AT2G32960	0.0128266	0.0179643
AT2G33210	-0.00944591	0.00765005
AT2G33310	-0.0176137	0.000376174
AT2G33530	0.0140437	0.00498145
AT2G33770	0.00836527	9.88142e-05
AT2G33830	0.0236048	0.00159992
AT2G34070	-0.0120027	0.00675848
AT2G34430	0.0710278	0.0018806
AT2G34480	-0.007708	0.00413107
AT2G34610	-0.0126981	0.016299
AT2G34850	-0.0290061	0.000141133
AT2G35000	0.0184717	0.0338172
AT2G35050	0.00539726	0.0457726
AT2G35270	0.0261034	2.56117e-05
AT2G35380	0.0120145	0.000437287
AT2G35600	0.0295047	0.0287474
AT2G35770	0.0208338	8.97048e-05
AT2G35930	0.0515932	0.00657548
AT2G35940	-0.00948339	0.0243276
AT2G35980	0.0360527	0.00355165
AT2G36100	0.0161915	1.19917e-05
AT2G36120	0.00803759	0.0298972
AT2G36290	0.0101458	6.0538e-06
AT2G36350	-0.0144838	0.0405592
AT2G36390	-0.0135116	0.00164907
AT2G36420	-0.00895831	0.0407644
AT2G36530	-0.00481977	0.021916
AT2G36690	0.0340814	0.0200319
AT2G36880	0.00576825	3.70274e-06
AT2G37040	0.00631417	0.000303917
AT2G37460	0.0156254	0.00021302
AT2G37540	0.0229993	0.0299848
AT2G37680	-0.0186539	0.0408895
AT2G37760	-0.0176401	1.11953e-09
AT2G37770	-0.0396848	7.32953e-09
AT2G37870	-0.0315245	1.98847e-06
AT2G37900	-0.0449845	2.78861e-06
AT2G38080	0.0123991	8.4782e-05
AT2G38110	0.0100242	0.0167003
AT2G38120	0.0155156	4.82882e-07
AT2G38250	-0.0376703	0.0106394
AT2G38300	0.0234944	0.0368552
AT2G38310	0.0198594	0.00241687
AT2G38380	-0.00785741	0.000473736
AT2G38390	-0.00731048	0.00413107
AT2G38460	0.0190002	0.0440077
AT2G38530	-0.0282435	1.79904e-12
AT2G38640	-0.014739	0.000267487
AT2G38670	-0.0082391	0.0356567
AT2G38800	0.00604113	0.00584788
AT2G38810	-0.0232017	0.00553668
AT2G39040	0.0422739	0.00273281
AT2G39050	-0.0108129	0.00286314
AT2G39210	0.0261852	1.85344e-07
AT2G39310	-0.0216102	4.93587e-33
AT2G39340	0.00836892	0.0157454
AT2G39350	-0.020843	1.50372e-08
AT2G39420	0.0202023	0.00029782
AT2G39460	-0.00614455	0.0211221
AT2G39510	-0.0156078	0.0188765
AT2G39530	0.0315553	0.000484825
AT2G39700	-0.00585352	0.0489636
AT2G39705	0.0380289	0.00131306
AT2G39800	-0.0309657	4.77488e-60
AT2G39870	0.0135884	0.0130274
AT2G39890	0.00966589	0.0280711
AT2G39950	0.0168607	0.000265131
AT2G40230	0.0258541	0.000350059
AT2G40360	-0.00766093	0.0405592
AT2G40390	0.0221658	0.0112254
AT2G40460	0.00979251	0.0278041
AT2G40730	0.00653448	0.0145599
AT2G40750	0.0521036	7.0549e-05
AT2G41190	-0.0265279	0.000222379
AT2G41310	0.0113546	0.00869338
AT2G41480	0.0176261	0.00015599
AT2G41640	0.018274	0.0224519
AT2G41650	-0.0147383	0.011361
AT2G42060	0.0335437	0.0337229
AT2G42240	-0.0166009	0.0389295
AT2G42350	0.0280857	0.00674706
AT2G42540	-0.0217561	0.0311405
AT2G42840	-0.0114391	0.013664
AT2G42910	-0.0166021	2.12435e-07
AT2G43050	0.0205338	0.0338172
AT2G43150	0.0108795	0.00104274
AT2G43160	0.00653658	0.00482672
AT2G43200	0.0191579	0.00112473
AT2G43530	-0.0702669	0.0195304
AT2G43535	-0.0101072	3.10588e-05
AT2G43550	0.024219	0.00902414
AT2G43570	0.0278986	0.023168
AT2G43590	0.0216138	0.0337285
AT2G43680	0.00933331	9.75237e-06
AT2G43910	0.0124384	0.000853674
AT2G44060	-0.00743209	0.00281905
AT2G44090	0.0106085	0.00308086
AT2G44110	0.0302097	0.0184624
AT2G44120	-0.00686189	0.0281308
AT2G44140	0.01004	0.0444679
AT2G44340	0.0681522	0.0419194
AT2G44380	0.0317421	0.000628337
AT2G44500	0.00946453	0.0394699
AT2G44790	0.0100645	0.000233059
AT2G45470	0.0133878	0.00332828
AT2G45550	0.0880152	0.00164944
AT2G45560	0.0391415	0.00291093
AT2G45750	0.0145408	0.0457956
AT2G45920	0.00862337	0.0192634
AT2G46270	-0.016031	9.60574e-06
AT2G46370	0.0103	0.00102918
AT2G46420	-0.0164775	0.000496547
AT2G46450	-0.0104558	0.0199251
AT2G46650	0.0197818	8.54048e-05
AT2G46660	0.0443656	8.32405e-07
AT2G46680	-0.0354064	3.45852e-28
AT2G46690	0.00927087	0.0172379
AT2G46750	0.0229401	3.34936e-06
AT2G46830	-0.00873295	0.00933646
AT2G46860	0.0284852	0.019898
AT2G46890	0.0153691	0.000633685
AT2G47000	0.00614363	0.0272489
AT2G47110	-0.00780707	0.0246668
AT2G47130	0.0148479	0.000176501
AT2G47370	0.0333693	0.0086161
AT2G47540	0.02065	0.00857547
AT2G47580	-0.0262364	0.0185369
AT2G47610	-0.00890306	0.0104216
AT2G47770	-0.0631898	0.000273318
AT2G47780	-0.0468949	0.0171085
AT2G48030	0.0171724	5.30603e-06
AT2G48130	0.0205744	3.2182e-05
AT2G48140	0.0170894	8.10833e-08
AT3G00880	0.0233537	0.021916
AT3G01175	0.026722	0.0297323
AT3G01260	0.0287069	3.82351e-12
AT3G01290	0.0306353	1.15293e-07
AT3G01500	0.0708447	0.000138455
AT3G01590	-0.0101321	0.0271327
AT3G01750	0.0295653	0.000233059
AT3G01860	0.0155306	0.00372556
AT3G01930	0.0108965	0.0173523
AT3G02020	0.0280985	0.0196551
AT3G02040	0.0516603	1.36437e-17
AT3G02100	0.0268319	0.00680509
AT3G02480	-0.0751296	2.41875e-13
AT3G03300	-0.00905074	0.0395478
AT3G03341	-0.0741681	7.73012e-07
AT3G03500	0.0172948	0.0147329
AT3G03780	0.00882939	0.000176055
AT3G03910	0.0549379	0.000351394
AT3G04240	-0.0062898	0.0300905
AT3G04350	0.011147	0.0452903
AT3G04370	0.0194672	0.00536715
AT3G04530	0.0254318	0.000914561
AT3G04630	-0.0126788	0.0109337
AT3G04840	-0.00787421	0.00174041
AT3G04920	-0.00900571	0.000109116
AT3G05200	0.0121644	0.0295554
AT3G05490	0.00898311	0.04739
AT3G05590	-0.00847919	0.000438875
AT3G05640	-0.0194849	0.00796773
AT3G05880	-0.0137126	0.00368236
AT3G05910	-0.00657694	0.0440077
AT3G06060	0.011952	0.00820029
AT3G06130	0.0111602	0.00804757
AT3G06360	-0.04477	0.0221776
AT3G06390	0.0185008	0.00150956
AT3G06760	-0.0111032	0.0383578
AT3G07000	0.0429904	0.0393882
AT3G07110	-0.00662399	0.0328224
AT3G07195	0.0273589	0.017711
AT3G07900	0.0258576	0.0379909
AT3G08030	-0.0106386	1.305e-05
AT3G08040	-0.0146966	0.00254934
AT3G08520	-0.010623	0.0158553
AT3G08580	-0.00436006	0.041163
AT3G08650	0.0110355	0.000727679
AT3G08860	-0.0395905	3.65553e-21
AT3G08970	-0.0285929	0.0442231
AT3G09200	-0.00947931	0.000604517
AT3G09220	0.01553	0.000121386
AT3G09400	0.0443056	0.00340083
AT3G09800	-0.0234597	0.000354568
AT3G09820	-0.00920167	7.10263e-06
AT3G09860	-0.0130967	0.037244
AT3G09910	-0.0232946	0.00858137
AT3G09940	0.0188353	3.48893e-05
AT3G09950	-0.0455187	0.00981758
AT3G10200	-0.03943	0.00218183
AT3G10340	0.00645822	0.0140997
AT3G10420	0.0134908	0.0322104
AT3G10820	-0.016358	0.0183491
AT3G10960	0.0115486	0.0255341
AT3G10985	0.0204646	3.11158e-08
AT3G11280	0.0122424	0.0016808
AT3G11410	-0.0125989	1.43916e-05
AT3G11430	0.0132053	0.000255905
AT3G11500	-0.0168748	0.00142173
AT3G11550	0.0146806	0.00211141
AT3G11940	-0.00624054	0.0341569
AT3G12110	0.0119274	0.0289936
AT3G12120	-0.00772244	0.00550667
AT3G12720	-0.025367	0.00444171
AT3G12900	0.0409938	0.043754
AT3G13110	0.0111453	0.0167042
AT3G13310	0.0127635	7.59701e-07
AT3G13520	-0.0061394	0.0241266
AT3G13610	0.02362	0.000128568
AT3G13720	0.0109281	0.00711597
AT3G13760	0.0534387	1.487e-06
AT3G13784	-0.0647525	3.13186e-13
AT3G13790	0.00744263	0.0488616
AT3G13840	0.045144	0.000401779
AT3G14210	0.0428546	0.0299948
AT3G14230	-0.00617621	0.0457726
AT3G14570	0.0112613	0.00438479
AT3G14590	-0.0138128	0.00648408
AT3G14600	-0.00758676	0.026806
AT3G14690	-0.00668451	0.0412036
AT3G14840	0.00753992	0.0332517
AT3G14940	0.0101838	0.0101786
AT3G15353	0.0165509	0.00881848
AT3G15360	0.0153065	0.04739
AT3G15500	0.0489081	0.0386178
AT3G15670	-0.143854	9.30298e-32
AT3G15820	0.0142876	9.56001e-05
AT3G16150	0.0269092	0.0149124
AT3G16240	0.0190044	8.32405e-07
AT3G16370	-0.0146712	0.0191364
AT3G16390	0.0211674	0.00600574
AT3G16400	-0.0116809	5.41383e-09
AT3G16420	-0.00769866	0.00205521
AT3G16430	-0.00940928	2.34851e-05
AT3G16440	0.0134459	0.0345944
AT3G16450	-0.0120513	9.27341e-20
AT3G16520	-0.0170077	0.0153846
AT3G16630	0.00842486	0.0170799
AT3G16640	0.00482746	0.0120868
AT3G16690	0.0222154	0.0183501
AT3G16770	-0.0134393	0.00339063
AT3G16800	-0.00647287	0.0108619
AT3G16940	0.00674921	0.0483481
AT3G17130	-0.0291092	0.00552338
AT3G17700	0.0228094	0.0292851
AT3G18170	0.0243858	0.0138249
AT3G18280	-0.00946255	0.00431489
AT3G18780	0.0061859	0.00012324
AT3G19450	0.00759302	0.0114454
AT3G19710	0.0166787	0.00492166
AT3G19930	0.0157305	0.00113189
AT3G19970	0.0226352	0.00115029
AT3G20015	0.0147456	0.00210998
AT3G20100	-0.0111639	0.00159554
AT3G20300	-0.0210421	0.0040968
AT3G20470	-0.0272404	4.01983e-06
AT3G20540	-0.0157015	0.0413749
AT3G20630	-0.00915181	0.00618771
AT3G21190	0.00766876	0.0439502
AT3G21340	0.043666	0.00551967
AT3G22060	-0.0223869	0.0375663
AT3G22240	0.0231042	7.35288e-07
AT3G22550	-0.0204483	0.00323382
AT3G22600	0.0173267	1.15792e-12
AT3G22620	0.0184006	5.64052e-11
AT3G22800	0.0223766	0.0424291
AT3G22850	-0.00911194	0.00142588
AT3G22890	0.00511347	0.0162515
AT3G22970	0.0111413	0.000316868
AT3G23030	-0.0133998	0.00351117
AT3G23090	0.0160743	5.42948e-05
AT3G23175	0.0183157	0.012748
AT3G23190	0.0250432	0.0023538
AT3G23390	-0.00855432	0.00695957
AT3G23430	0.00688152	0.00861422
AT3G23450	-0.0410884	0.0163784
AT3G23530	0.00870723	0.000211026
AT3G23640	-0.0104822	0.0061448
AT3G23670	-0.0168769	0.0136182
AT3G23730	0.0312972	0.00859777
AT3G23800	0.0344114	0.0161367
AT3G23820	0.00672989	0.0352141
AT3G23920	-0.0200508	7.99761e-17
AT3G23990	-0.006154	0.0389436
AT3G24020	0.0323249	0.0414507
AT3G24170	-0.00518776	0.0100729
AT3G24300	0.0256588	0.000599847
AT3G24515	-0.0237638	0.0343966
AT3G24550	0.00674692	0.0476691
AT3G24830	-0.00886519	0.00733577
AT3G25290	-0.0103187	0.0112806
AT3G25520	-0.0085729	0.00143707
AT3G25585	0.0137765	0.00116998
AT3G25710	-0.0115264	0.0262908
AT3G25717	0.0199373	0.0291212
AT3G26330	0.0191144	1.63205e-05
AT3G26460	-0.0100825	0.00339151
AT3G26470	0.0137902	0.00050798
AT3G26520	0.0109622	3.72095e-06
AT3G26744	-0.0176181	0.00268037
AT3G26830	-0.0362919	0.00186794
AT3G27150	0.0205461	0.00142173
AT3G27170	0.0168576	0.00563549
AT3G27190	0.00995578	0.00660654
AT3G27250	-0.0519082	2.86905e-08
AT3G27320	0.0123611	0.0163843
AT3G27400	-0.0349992	8.46141e-06
AT3G27430	-0.00618964	0.0495519
AT3G27690	0.0365784	0.00887658
AT3G27770	-0.010082	0.0478044
AT3G28007	-0.0865802	0.000203079
AT3G28050	0.0138308	7.72186e-05
AT3G28180	0.0137709	0.0300729
AT3G28455	-0.0244537	0.0467307
AT3G28550	0.0158869	0.00235612
AT3G28740	-0.00738156	0.0318415
AT3G28875	0.0907732	0.0175146
AT3G29390	0.00917988	0.00624322
AT3G29410	0.0306006	1.62358e-10
AT3G29575	-0.0223336	5.05475e-14
AT3G30180	-0.0183898	0.00835028
AT3G30210	-0.0705678	6.42148e-08
AT3G32030	0.0202002	0.00258063
AT3G32040	0.0495403	0.000802487
AT3G32980	0.00439431	0.0115272
AT3G43270	-0.0232344	0.000473443
AT3G43720	-0.0230036	0.00029738
AT3G43960	0.0198194	0.0405592
AT3G44300	-0.00971312	0.00245753
AT3G44310	-0.00696454	0.0345455
AT3G44326	0.0222232	6.19664e-07
AT3G44380	0.0231837	0.0219075
AT3G44510	0.0259132	0.000188658
AT3G44540	0.00972557	0.00607645
AT3G44550	0.00894329	0.0124049
AT3G44720	0.0100726	0.00104274
AT3G44990	0.01868	1.92382e-17
AT3G45130	0.0278576	9.37301e-09
AT3G45240	0.0106134	0.0145599
AT3G45290	0.053739	0.00881848
AT3G45650	0.025968	2.07669e-05
AT3G45680	0.0133954	0.00224514
AT3G45700	0.0193484	0.00267901
AT3G45710	0.0192588	0.000159565
AT3G45770	-0.0133239	0.0246743
AT3G45840	0.0348633	0.00293181
AT3G45970	-0.0204107	0.0243276
AT3G46040	-0.0135839	0.000378975
AT3G46280	0.0222264	5.71454e-06
AT3G46430	-0.0114251	2.36157e-05
AT3G46510	0.0090701	0.00687979
AT3G46560	-0.0122249	0.00816431
AT3G46700	-0.0139887	3.5801e-06
AT3G46880	0.0452547	1.87134e-06
AT3G47220	0.0250343	0.000120461
AT3G47340	-0.0208703	0.00053644
AT3G47420	0.0188294	6.53265e-07
AT3G47600	-0.048388	0.000582054
AT3G47740	0.0430857	0.00530358
AT3G47780	0.0130778	0.000103919
AT3G47800	-0.0221421	0.0132679
AT3G47820	0.0229972	0.000175205
AT3G48020	-0.0210206	0.00597673
AT3G48090	0.0148996	0.00866144
AT3G48100	0.0228814	7.69347e-05
AT3G48140	0.00829355	7.91488e-06
AT3G48510	-0.0432187	1.37995e-07
AT3G48930	-0.00749091	0.0287474
AT3G48940	0.052292	0.00660992
AT3G48990	-0.00610669	0.0335446
AT3G49220	-0.0136576	0.000252867
AT3G49330	0.0252697	0.00483976
AT3G49910	-0.00775459	0.00238413
AT3G49940	0.0199661	2.51729e-10
AT3G50300	0.0109704	0.00308915
AT3G50350	0.0303444	1.00228e-12
AT3G50700	0.0170437	0.0321724
AT3G50740	0.0318403	5.82562e-11
AT3G50970	-0.0274913	1.43983e-45
AT3G51160	0.0102076	0.00398907
AT3G51330	0.0270257	1.81732e-09
AT3G51350	0.0293575	0.00067469
AT3G51580	0.0099003	0.0195704
AT3G51600	-0.0148788	0.0244972
AT3G51630	0.00769917	0.00711597
AT3G51720	-0.0140954	0.000405085
AT3G51740	-0.0108471	0.0245594
AT3G51750	-0.0525171	1.83558e-12
AT3G51800	-0.00487288	0.0308226
AT3G51840	0.00824751	0.0121268
AT3G51860	-0.0194979	0.00204213
AT3G51950	0.00819464	0.000506982
AT3G52060	0.0120029	0.00118226
AT3G52190	0.0139666	0.0143233
AT3G52370	0.0142793	0.000287523
AT3G52400	0.0134302	0.0188379
AT3G52500	0.0107623	0.0106121
AT3G52560	0.00836541	0.0124289
AT3G52580	-0.00920418	0.00727841
AT3G52590	-0.00963621	0.000178913
AT3G52748	0.0391774	0.0147247
AT3G52970	0.033276	1.36123e-07
AT3G52990	-0.00660843	0.000733719
AT3G53150	0.0273584	0.0179099
AT3G53180	-0.00787442	0.0101786
AT3G53260	0.00508501	0.00680509
AT3G53510	0.0166243	6.90778e-05
AT3G53540	-0.0229799	1.79564e-07
AT3G53570	0.0132809	0.00970704
AT3G53630	-0.0128421	0.0240318
AT3G53870	-0.00812948	0.00497856
AT3G53980	-0.0121801	2.78417e-11
AT3G54040	0.0368562	1.5921e-14
AT3G54140	0.0133714	0.000260871
AT3G54220	0.0102214	0.0220933
AT3G54260	-0.0245697	8.88041e-22
AT3G54440	-0.00730126	0.0420608
AT3G54500	0.00700215	0.00779886
AT3G54580	0.0238698	0.00630702
AT3G54590	0.0263903	0.0034491
AT3G54720	0.0267393	7.72211e-22
AT3G54820	-0.026525	1.15293e-07
AT3G54900	0.0137258	0.00093088
AT3G54920	-0.0161584	0.00126512
AT3G55230	0.0146604	2.50732e-07
AT3G55280	-0.00879489	0.00734505
AT3G55320	0.0138125	0.00949923
AT3G55360	0.00771466	0.0389101
AT3G55420	0.0156535	0.000966502
AT3G55440	-0.00450127	0.0495339
AT3G55750	-0.010896	0.00117314
AT3G55770	0.00578524	0.0121403
AT3G56020	-0.0132115	0.00117176
AT3G56230	0.0239424	0.00503858
AT3G56360	0.0120117	0.0237694
AT3G56400	0.041777	0.000441532
AT3G56730	0.0290666	0.0186489
AT3G57010	-0.0154671	6.99637e-15
AT3G57260	0.124033	0.021916
AT3G57330	0.0169822	2.22953e-05
AT3G58270	-0.0303149	0.00372447
AT3G58550	-0.010923	1.34277e-05
AT3G58990	0.0280589	1.70773e-07
AT3G59280	-0.0139105	0.000299616
AT3G59370	0.0169979	0.00383979
AT3G59480	-0.0275033	0.0301833
AT3G59765	-0.0299987	0.00175905
AT3G59820	-0.0246109	2.47983e-07
AT3G59900	-0.0639273	0.0295327
AT3G60140	-0.0318923	1.86626e-08
AT3G60245	-0.00778641	0.0122297
AT3G60280	0.043582	0.0206985
AT3G60415	0.0304363	0.00606903
AT3G60490	0.0263203	0.0336621
AT3G60700	0.0497613	0.0306527
AT3G61260	0.0139359	0.000517854
AT3G61280	0.0417047	0.013488
AT3G61380	0.0113815	0.0125354
AT3G61390	0.0344458	0.00277663
AT3G61410	0.0215003	0.0145683
AT3G61490	-0.0133142	0.0158794
AT3G61830	0.0125605	0.0229129
AT3G61850	0.0171095	0.00021938
AT3G61890	-0.0209131	0.000305442
AT3G61990	0.00633473	0.0302428
AT3G62040	0.0107511	4.52431e-05
AT3G62270	0.00939555	0.0316191
AT3G62400	-0.00895454	0.0171891
AT3G62680	0.0316133	0.00932259
AT3G62700	-0.0094626	7.12019e-06
AT3G62730	-0.0253351	0.00837458
AT3G62740	-0.0219303	2.5087e-06
AT3G62870	-0.00760471	0.0229129
AT3G63060	-0.0402998	0.0084542
AT3G63110	0.0161851	0.00649409
AT3G63200	0.00945952	0.023168
AT3G63280	0.0102333	0.022487
AT3G63300	0.0179658	0.00119593
AT3G63380	0.0324373	1.3945e-05
AT4G00430	-0.00740245	0.0105943
AT4G01100	-0.00514291	0.02749
AT4G01390	-0.0244195	5.07728e-12
AT4G01450	0.0127289	0.000122657
AT4G01630	-0.0209629	0.000430412
AT4G01650	-0.0194693	0.0183501
AT4G01883	-0.0395709	0.0117018
AT4G01985	-0.0960004	4.83257e-08
AT4G02075	0.0302469	0.000732333
AT4G02230	-0.00675349	0.0423766
AT4G02280	-0.0313104	6.28228e-16
AT4G02360	-0.0332939	0.000153373
AT4G02380	-0.014335	1.84311e-06
AT4G02480	0.00468927	0.0459538
AT4G02620	-0.00944407	0.0412036
AT4G02850	0.0261099	8.6417e-06
AT4G02930	-0.00754199	0.0197821
AT4G03330	0.0657019	0.0110986
AT4G03610	0.0146605	0.0186007
AT4G04020	-0.0131294	0.0455422
AT4G04450	0.0274624	0.0205251
AT4G04610	0.00820863	0.00197206
AT4G04840	0.0277905	1.36424e-05
AT4G04955	0.012978	0.00697861
AT4G04990	0.0357416	5.87789e-05
AT4G05050	-0.00940939	1.43018e-05
AT4G05150	0.00964525	0.0035429
AT4G05200	0.0249756	0.00117176
AT4G06880	-0.0702356	0.0363902
AT4G07820	0.0275055	0.00164267
AT4G08150	-0.0178075	0.0430265
AT4G08300	0.071648	0.00227197
AT4G08930	0.013916	0.00830965
AT4G09830	0.00869232	0.00342059
AT4G10310	-0.038714	2.28593e-05
AT4G10500	0.0247716	0.0196551
AT4G10890	-0.0166282	0.0416893
AT4G10955	-0.0182542	0.0131603
AT4G11010	-0.00932402	6.41801e-06
AT4G11220	-0.0146007	1.92178e-05
AT4G11290	0.0140698	0.00211257
AT4G11350	-0.0156241	0.0152983
AT4G11360	0.0140319	0.0238973
AT4G11650	0.00783935	0.0203817
AT4G11880	0.00789747	0.034154
AT4G12000	-0.0243846	0.0172049
AT4G12030	0.0214449	1.43053e-05
AT4G12040	0.00966691	0.00635396
AT4G12430	-0.0412405	1.15059e-08
AT4G12480	-0.0543191	5.25624e-05
AT4G12510	0.0182581	9.21068e-06
AT4G12520	0.0163234	3.05348e-05
AT4G12600	-0.0082493	0.03197
AT4G12730	0.0210315	1.06752e-12
AT4G13130	0.034795	0.0225358
AT4G13180	-0.0067543	0.0298783
AT4G13310	0.0508963	4.92901e-05
AT4G13340	0.0160858	0.00836699
AT4G13420	0.0562119	2.03182e-05
AT4G13480	-0.0753733	0.0210764
AT4G13770	0.0213241	0.000264742
AT4G13830	0.0218324	0.0145723
AT4G13850	-0.00660955	0.0471108
AT4G13930	0.00554827	0.00292925
AT4G14020	-0.035594	1.09099e-05
AT4G14030	-0.00768338	4.22754e-05
AT4G14060	-0.020688	3.87345e-10
AT4G14130	0.0226152	0.0106394
AT4G14320	-0.00792513	0.0163451
AT4G14390	0.0284045	0.0101786
AT4G14465	0.00759285	0.0454829
AT4G14550	0.016774	0.0219802
AT4G14580	0.0246382	2.28642e-08
AT4G14630	0.0392251	0.000225673
AT4G14740	0.0194805	0.000433115
AT4G15260	-0.0200929	0.0470087
AT4G15290	0.0538059	7.69347e-05
AT4G15340	0.0255148	0.00174041
AT4G15390	0.0233019	2.01912e-07
AT4G15393	0.0138665	0.00415319
AT4G15450	-0.0157806	0.0251899
AT4G15640	-0.0182114	0.00274566
AT4G15910	-0.0157958	6.28866e-09
AT4G15920	0.0105681	0.0472565
AT4G15990	0.0483705	1.24417e-05
AT4G16370	0.0152532	0.000473736
AT4G16380	0.00996625	0.00563549
AT4G16450	-0.0100257	0.0126654
AT4G16660	-0.00623214	0.0129982
AT4G16760	-0.00788785	0.000385908
AT4G16790	-0.0145226	0.0122039
AT4G16800	-0.0202473	0.035591
AT4G16920	0.0247145	0.000349643
AT4G16950	0.0148004	0.0307758
AT4G17080	0.0137737	0.00949635
AT4G17280	0.0123657	0.0013302
AT4G17680	0.0827274	0.0445485
AT4G17800	0.015815	1.78157e-05
AT4G17870	0.0181376	0.000176757
AT4G17970	-0.02572	0.00954412
AT4G18010	-0.0124272	0.023168
AT4G18020	-0.012923	0.0110092
AT4G18100	-0.0105713	9.69887e-05
AT4G18280	-0.0408442	1.21835e-06
AT4G18430	0.016862	0.0337194
AT4G18610	0.0151983	0.0271351
AT4G18700	-0.00772422	0.0248387
AT4G18950	0.0091536	0.0472565
AT4G19160	0.00759931	0.0457261
AT4G19230	-0.0282276	1.96986e-09
AT4G19370	0.0256168	0.0451325
AT4G19810	-0.0137393	3.12448e-05
AT4G19840	-0.0260495	8.99542e-08
AT4G19920	0.0671671	0.00149036
AT4G19970	0.0411826	0.0139035
AT4G20240	0.0114407	0.0224422
AT4G20260	0.011372	0.00747081
AT4G20270	0.0116172	0.000973226
AT4G20320	-0.0156104	3.36559e-06
AT4G20390	0.019096	8.99263e-09
AT4G20460	0.0124136	0.00372556
AT4G20760	-0.0247363	0.0467637
AT4G20840	0.0212686	0.000807701
AT4G20860	0.0134629	0.0427586
AT4G21400	0.0157875	0.0266186
AT4G21410	0.0104332	0.0341455
AT4G21570	-0.0127321	0.0350477
AT4G21680	-0.0713122	0.0105943
AT4G21750	-0.0334861	0.0200494
AT4G21760	0.0247976	0.0169178
AT4G21830	0.0177357	0.00686841
AT4G21850	0.00872127	0.000912039
AT4G22110	0.0291907	0.00526445
AT4G22120	0.0110328	0.000212377
AT4G22212	0.0120449	0.0227829
AT4G22220	-0.00684161	0.0116387
AT4G22240	-0.0104341	0.000463677
AT4G22666	0.025802	4.59583e-05
AT4G22840	0.0137404	0.0249431
AT4G22930	-0.00944152	0.0207282
AT4G23270	0.0203779	2.04785e-05
AT4G23400	0.0180684	2.03649e-07
AT4G23500	-0.0149702	1.66627e-05
AT4G23550	0.0315547	0.0040631
AT4G23620	-0.0151439	0.0123395
AT4G23630	-0.00667147	0.000633348
AT4G23670	-0.0140122	1.25126e-33
AT4G23700	0.0238171	2.42011e-07
AT4G23810	-0.0491122	0.0175015
AT4G23920	-0.0223805	4.59583e-05
AT4G23980	0.0167702	0.00104107
AT4G24020	0.0115089	5.24826e-05
AT4G24130	0.0140317	2.03182e-05
AT4G24190	-0.00633082	0.00311774
AT4G24240	0.0130607	0.00217244
AT4G24460	0.0168998	0.0405592
AT4G24960	-0.0255598	8.49018e-25
AT4G25090	0.0341175	0.000276024
AT4G25250	0.0224885	0.00339811
AT4G25400	0.0200241	3.34936e-06
AT4G25433	-0.0429922	0.00274813
AT4G25640	0.00928148	0.00295009
AT4G25670	-0.0152677	0.000615851
AT4G25850	-0.0254183	0.00758477
AT4G26080	-0.0195196	2.21234e-14
AT4G26230	-0.013578	0.00264808
AT4G26780	0.0143465	0.0269226
AT4G26850	0.0106931	6.63183e-05
AT4G27290	0.0328175	0.0105015
AT4G27410	-0.0153036	0.00135687
AT4G27520	-0.0169673	7.69062e-07
AT4G28040	-0.0264116	1.30561e-07
AT4G28110	0.0280031	0.000120542
AT4G28140	-0.0612093	0.0400202
AT4G29020	-0.0167468	0.0285238
AT4G29190	-0.0191949	0.00113088
AT4G29410	-0.00762719	0.0198622
AT4G29700	0.00665021	0.0348546
AT4G29720	0.016268	0.000403386
AT4G29740	0.0354814	2.12435e-07
AT4G29800	0.026867	0.000122657
AT4G29905	0.0122825	0.0119462
AT4G30110	0.0248218	5.36994e-06
AT4G30140	0.028469	9.07385e-08
AT4G30170	0.0110157	0.000520141
AT4G30190	0.0152836	1.15293e-07
AT4G30280	0.0349025	8.6182e-07
AT4G30470	-0.00924802	0.00212398
AT4G30500	-0.0225594	0.00973903
AT4G30600	-0.00603983	0.0112254
AT4G30650	-0.0218977	0.00182567
AT4G30810	-0.0112375	0.00195561
AT4G31120	-0.0113898	0.00733165
AT4G31290	-0.0120017	6.70366e-06
AT4G31500	0.0236287	4.30861e-14
AT4G31550	0.0124672	0.001024
AT4G31700	-0.00965112	0.000107835
AT4G31920	0.0170221	4.64711e-08
AT4G31970	0.0384488	0.000121386
AT4G32270	0.0160529	0.00357086
AT4G32780	0.0340422	0.00133257
AT4G32840	-0.0178698	0.0228724
AT4G32850	0.00781056	0.00954412
AT4G32860	0.0264817	0.00862181
AT4G33030	0.0135161	0.00713685
AT4G33220	-0.0153419	0.0484833
AT4G33330	0.0173992	0.00292857
AT4G33540	-0.0161168	0.000520141
AT4G33550	-0.033285	1.12587e-22
AT4G33610	0.0275833	4.22219e-16
AT4G33770	0.0189347	0.0175015
AT4G34135	-0.00744473	0.00744366
AT4G34230	-0.00542096	0.017739
AT4G34250	-0.0416473	0.00176389
AT4G34560	0.0154	0.0392805
AT4G34650	-0.0502571	1.11999e-05
AT4G34670	-0.00831374	0.0211778
AT4G34710	-0.0150564	4.37028e-20
AT4G34870	-0.00762869	0.00103082
AT4G35030	0.0223083	4.7201e-06
AT4G35060	0.00953442	0.00870793
AT4G35160	0.0113552	0.000363028
AT4G35270	0.0181137	0.0157831
AT4G35300	-0.00838201	0.0196551
AT4G35380	0.0130506	0.0264352
AT4G35550	-0.0163325	0.000690208
AT4G35570	-0.00820002	0.0286366
AT4G35720	-0.0285568	2.04921e-05
AT4G35750	0.0204453	2.80993e-13
AT4G35790	-0.00641352	0.0114603
AT4G35850	-0.0127921	0.000321093
AT4G36250	-0.0177329	0.0281587
AT4G36410	0.0197212	0.0192131
AT4G36430	-0.0217046	2.25776e-13
AT4G36610	0.013139	1.26512e-05
AT4G36640	0.015064	0.00327384
AT4G36760	-0.00618596	0.0440077
AT4G36860	0.0118305	0.00458969
AT4G36920	0.00734044	0.0184457
AT4G37160	0.0359563	1.49317e-13
AT4G37180	-0.0100248	0.018303
AT4G37300	-0.0100433	0.0255047
AT4G37340	0.022646	0.0268691
AT4G37370	-0.032181	0.000195674
AT4G37870	-0.00788048	1.74073e-05
AT4G37890	0.0239458	0.0224422
AT4G37900	0.0316613	0.010058
AT4G37910	-0.00729946	0.0035429
AT4G37950	0.0522806	0.00646924
AT4G37970	-0.0403386	2.12288e-11
AT4G38080	0.00905519	0.0104157
AT4G38620	0.0158997	0.00409726
AT4G38660	0.0147421	0.00780553
AT4G38810	-0.0171366	2.20599e-12
AT4G39200	-0.00923545	0.00870793
AT4G39210	-0.021885	0.0040968
AT4G39260	0.0211241	5.6757e-19
AT4G39330	-0.0303721	0.000582054
AT4G39350	0.0150695	6.24284e-11
AT4G39675	-0.0297231	0.000912039
AT4G39730	-0.00701905	0.0477191
AT4G39770	0.0332007	0.000337465
AT4G39940	0.0303738	1.62358e-10
AT4G39950	0.0185844	1.2643e-06
AT4G39980	0.0121129	4.33349e-08
AT4G40030	0.0088246	0.000225374
AT4G40040	0.0081045	6.70186e-05
AT4G40060	0.0122664	9.78632e-06
AT5G00580	-0.045637	0.00274813
AT5G01220	0.0178598	3.74084e-05
AT5G01520	-0.0146763	0.00448617
AT5G01600	-0.0148836	0.000288932
AT5G01710	0.00853826	0.0106394
AT5G01720	0.0161365	4.16974e-05
AT5G01800	0.00710709	0.00657548
AT5G01830	0.019528	0.00117314
AT5G01870	-0.0234055	1.70998e-10
AT5G02020	-0.0210334	0.00971652
AT5G02170	-0.0252836	0.00822282
AT5G02240	-0.0133981	0.00623836
AT5G02270	0.0105708	0.000104551
AT5G02380	-0.00784313	0.00866353
AT5G02810	0.00799876	0.0214518
AT5G02870	-0.00615973	0.0445485
AT5G03040	0.00973811	9.83134e-05
AT5G03190	-0.0124412	0.0169178
AT5G03240	0.00600849	0.0257071
AT5G03260	0.009544	0.0227003
AT5G03280	0.00581137	0.0114231
AT5G03380	0.0151509	3.98028e-05
AT5G03630	0.00678677	0.00278466
AT5G03960	0.019453	0.0190362
AT5G04120	0.0289588	2.56318e-07
AT5G04220	0.0141897	0.00248675
AT5G04885	-0.0204976	0.00582178
AT5G04950	0.0160668	0.00359952
AT5G04980	0.0191192	0.00600574
AT5G05010	-0.00461437	0.0480935
AT5G05500	0.0256033	0.0168829
AT5G05600	0.0140587	0.0314404
AT5G05730	0.0113988	0.0122774
AT5G05960	-0.0138427	1.63174e-05
AT5G06200	0.013023	0.0152389
AT5G06280	0.0135719	0.023168
AT5G06300	0.0157855	0.00422947
AT5G06330	0.0201305	0.00854667
AT5G06530	-0.0502791	2.33858e-20
AT5G06720	-0.0264674	0.034154
AT5G06730	-0.0269761	0.000104597
AT5G06740	0.0434809	0.00318112
AT5G06760	-0.0754962	4.21281e-31
AT5G06900	0.0213505	0.000708675
AT5G06905	0.0333002	0.000102411
AT5G06980	-0.0118995	0.00640028
AT5G07030	-0.0064283	0.0141486
AT5G07080	0.0155638	0.0360323
AT5G07090	-0.0083245	0.00175627
AT5G07130	0.0204771	4.42407e-09
AT5G07322	0.0157282	0.00264808
AT5G07440	-0.00716377	0.00973188
AT5G07680	-0.0128289	0.0470938
AT5G07770	0.0223486	0.00166813
AT5G08240	0.014376	0.012126
AT5G08260	-0.0111154	0.0278824
AT5G08560	0.00703006	0.00633788
AT5G08570	-0.00904323	0.00192712
AT5G09220	-0.00720308	0.00818142
AT5G09290	0.0244365	0.000433153
AT5G09520	0.0112406	0.00883129
AT5G09530	0.0151382	1.73513e-06
AT5G09770	-0.0118834	0.0272842
AT5G09870	0.00935253	0.00345134
AT5G10180	-0.0240292	1.04775e-09
AT5G10230	0.0316893	6.15223e-11
AT5G10280	0.0134239	0.0102584
AT5G10300	-0.0138566	0.0210366
AT5G10450	0.00533499	0.0409931
AT5G10580	-0.0109541	2.62683e-05
AT5G10750	0.0155563	0.00161946
AT5G11000	0.0152902	0.000202773
AT5G11110	-0.0206167	5.43827e-11
AT5G11520	-0.00817414	0.0047122
AT5G11570	0.027968	0.00664427
AT5G11650	0.0149724	0.00148577
AT5G11670	0.0172725	2.01281e-11
AT5G11790	0.00699236	0.0100729
AT5G12140	-0.0150016	4.68065e-07
AT5G12330	-0.0242947	0.00319642
AT5G12420	0.0153478	6.58686e-06
AT5G12930	-0.0192104	0.0416893
AT5G13020	0.00714478	0.0291588
AT5G13180	-0.00950904	0.0088665
AT5G13360	-0.0213004	1.32469e-05
AT5G13370	-0.0350402	3.28541e-12
AT5G13400	-0.0433728	0.0121642
AT5G13420	-0.00758697	8.61314e-06
AT5G13450	-0.00701128	0.00751001
AT5G13580	0.0209246	1.94667e-06
AT5G13750	-0.0164997	1.6601e-08
AT5G13930	0.00748072	0.0321531
AT5G13990	0.0200977	0.0147329
AT5G14130	0.0134043	0.00117314
AT5G14200	0.0121767	0.00580497
AT5G14430	0.010119	0.00214445
AT5G14590	-0.00714077	0.0249431
AT5G14640	-0.00734941	0.041163
AT5G14880	0.0142938	0.00327146
AT5G15090	-0.00688407	0.00762219
AT5G15130	0.0226731	0.000477016
AT5G15190	-0.0238915	0.0463829
AT5G15230	-0.0120855	5.09214e-05
AT5G15830	-0.0206346	0.0101821
AT5G15950	-0.00888599	0.00117176
AT5G15960	-0.0432822	2.54573e-41
AT5G15970	-0.0222937	1.48974e-17
AT5G16000	0.0159211	0.000181976
AT5G16040	-0.0235125	3.34936e-06
AT5G16070	-0.0109515	0.000807701
AT5G16660	0.0102857	0.0295554
AT5G16715	-0.0135183	0.0468248
AT5G16730	0.00890665	0.0061231
AT5G16970	-0.0243733	8.54048e-05
AT5G16980	-0.0290836	0.000176757
AT5G17330	0.0100664	0.000202773
AT5G17380	-0.00820306	0.00667697
AT5G17450	0.0269077	0.0356567
AT5G17460	-0.0185302	1.1076e-12
AT5G17760	-0.0154415	0.00455415
AT5G17820	0.0207432	0.000104585
AT5G18640	0.0115546	0.0110061
AT5G18650	0.00893437	0.0499099
AT5G18840	-0.0144649	0.00603916
AT5G18860	0.00801645	0.00686841
AT5G19120	0.0260265	6.55184e-09
AT5G19190	0.029747	0.00378395
AT5G19230	0.0220598	0.00016272
AT5G19240	0.0173141	0.00274041
AT5G19260	0.0217239	0.00258063
AT5G19440	-0.0138769	6.60228e-09
AT5G19600	0.0182259	9.75237e-06
AT5G19730	-0.0172437	0.000101929
AT5G19740	0.0103027	0.00432354
AT5G19770	0.0079042	0.00131306
AT5G19820	0.00655479	0.0047122
AT5G19860	0.0064848	0.0267465
AT5G19875	-0.0172289	0.00050798
AT5G19980	0.0144464	0.0289936
AT5G20000	-0.00820945	0.0433625
AT5G20020	-0.00697104	0.0323901
AT5G20090	0.00608051	0.0352119
AT5G20150	0.0565125	9.13177e-42
AT5G20350	0.00794177	0.0456311
AT5G20400	0.011694	0.0445485
AT5G20650	0.0208917	6.70909e-05
AT5G20730	0.0077932	0.0297938
AT5G20790	0.0276402	0.000766496
AT5G20830	-0.0200539	1.1173e-08
AT5G20885	0.00918038	0.0229129
AT5G20950	-0.00789216	0.035563
AT5G20960	0.0102717	5.56986e-06
AT5G21950	0.0153343	0.0450996
AT5G22020	0.00776503	0.0213985
AT5G22290	-0.0223502	0.00340915
AT5G22300	-0.0340902	0.00215629
AT5G22410	0.0273515	0.00893342
AT5G22440	-0.00655201	0.0378442
AT5G22500	-0.0124912	0.0138962
AT5G22630	0.00524315	0.0448513
AT5G22640	-0.0119174	0.0254997
AT5G23020	0.0139304	0.00377649
AT5G23100	0.0189067	0.0234379
AT5G23190	0.010804	0.00102238
AT5G23740	-0.00765482	0.0323838
AT5G23820	-0.0124556	0.000364883
AT5G23860	0.0119203	0.000372735
AT5G23980	0.0401929	9.92455e-06
AT5G24090	-0.0126938	0.0418889
AT5G24165	0.0106426	0.018763
AT5G24230	0.0350495	0.0280713
AT5G24313	0.0562112	0.0220933
AT5G24410	0.0181944	0.0433625
AT5G24530	0.0101208	0.00493924
AT5G24660	-0.0125093	0.00085641
AT5G24735	0.0113273	0.00870754
AT5G24760	0.00777582	0.0272454
AT5G24770	-0.0227106	2.88433e-13
AT5G24780	-0.0123865	0.001362
AT5G24800	-0.00858847	0.0389025
AT5G24810	0.00696885	0.0309501
AT5G24880	0.0497971	0.0316191
AT5G24920	0.0338125	0.0313279
AT5G25250	0.0287932	0.0113349
AT5G25260	0.0616816	0.00280556
AT5G25610	-0.0325392	1.16711e-09
AT5G25620	0.023289	0.000363537
AT5G25630	-0.0166663	0.0188949
AT5G25810	0.0260177	0.000230506
AT5G25890	0.0114575	0.000386433
AT5G26000	0.10389	0.0198978
AT5G26220	-0.0260857	0.0021931
AT5G26280	0.010377	0.00859777
AT5G26310	0.01786	0.000147823
AT5G26340	-0.0213081	3.17385e-08
AT5G26740	0.00985217	0.0201137
AT5G26920	0.0412951	7.57561e-08
AT5G27420	0.02057	0.0463406
AT5G27450	0.0106309	0.0367718
AT5G27760	-0.0104978	0.00236009
AT5G27770	-0.00986041	0.00141133
AT5G27850	-0.00651954	0.00853979
AT5G27920	0.0134885	0.000448749
AT5G28060	-0.00829035	0.0100277
AT5G28510	-0.0416053	0.000105672
AT5G28770	0.0181695	0.0484082
AT5G35190	0.0336031	2.04472e-05
AT5G35200	0.00822645	0.00344116
AT5G35370	0.0143285	0.0189549
AT5G36130	0.0300085	0.000120039
AT5G36140	0.0367002	7.461e-13
AT5G36180	0.0164181	0.000622151
AT5G36940	0.0153235	2.67938e-05
AT5G37500	-0.0132346	0.000519702
AT5G37740	0.00921847	0.000369011
AT5G37970	-0.0814555	0.0236737
AT5G37990	-0.00991333	0.00928239
AT5G38010	0.013269	0.0222364
AT5G38020	-0.0103006	0.000372143
AT5G38410	0.0597178	0.00267901
AT5G38420	0.053591	0.0257282
AT5G38530	-0.00991131	0.0484991
AT5G38910	0.0489305	4.92122e-05
AT5G39050	-0.0403136	2.44327e-14
AT5G39740	-0.00721005	0.00631812
AT5G39890	-0.0608313	0.0457726
AT5G40000	-0.0832265	1.03851e-05
AT5G40240	0.0108382	0.0248387
AT5G40370	-0.00964904	0.000485626
AT5G40390	-0.0144005	1.66157e-09
AT5G40800	-0.043318	4.5413e-09
AT5G41040	0.0161662	9.18445e-09
AT5G41140	0.0117624	2.91495e-05
AT5G41520	-0.00833003	0.000135543
AT5G41670	-0.00859819	0.000204744
AT5G41700	0.00893538	0.000240677
AT5G41990	0.00725574	0.0423094
AT5G42500	0.0226436	1.16206e-07
AT5G42570	-0.00870701	0.0393882
AT5G42600	-0.0182975	0.00467053
AT5G42860	0.00844192	0.0255284
AT5G42980	-0.0105322	5.31965e-11
AT5G43150	0.0125246	2.57335e-08
AT5G43180	-0.00708399	0.0109756
AT5G43350	0.027718	5.41383e-09
AT5G43520	0.0458647	2.71418e-05
AT5G43540	0.0368698	0.016423
AT5G43780	0.0110635	1.87328e-06
AT5G43830	-0.00554828	0.0216175
AT5G44020	0.0176931	1.9965e-05
AT5G44130	0.0460118	0.0414282
AT5G44480	0.0127486	0.020583
AT5G44567	0.0475802	0.0225624
AT5G44585	0.0555056	0.000927567
AT5G44610	0.0213003	0.00115599
AT5G44750	0.00979496	0.00420596
AT5G44770	-0.0725889	0.0147366
AT5G45380	0.0321876	6.02461e-09
AT5G45430	0.0092285	6.96865e-05
AT5G45800	0.0136609	0.00687727
AT5G45920	-0.0282166	5.06396e-08
AT5G46760	0.00727351	0.0455051
AT5G46790	0.0194328	0.00179877
AT5G46890	0.0171535	0.00114264
AT5G46900	0.0243514	3.02902e-08
AT5G47020	-0.00854246	0.0184507
AT5G47050	0.0128863	0.020609
AT5G47210	-0.0059974	0.00622804
AT5G47650	-0.015424	0.0249431
AT5G47720	0.0100534	0.0136318
AT5G47820	0.0064627	0.0280964
AT5G47910	0.0080124	0.0334246
AT5G47950	0.0285037	0.00150603
AT5G47980	0.0209939	0.0106642
AT5G47990	0.0113947	0.0227193
AT5G48180	-0.0172505	1.86626e-08
AT5G48430	0.0396736	0.0168829
AT5G48480	-0.0144523	3.19053e-06
AT5G48900	-0.0125118	0.0145599
AT5G49270	0.0214921	0.00331038
AT5G49760	0.0115226	0.00172108
AT5G49770	0.0518951	0.00236004
AT5G49780	0.0359922	0.000300062
AT5G49870	0.0318477	0.0472565
AT5G49890	0.00947171	0.029371
AT5G50010	0.0159544	0.000258182
AT5G50130	-0.0308972	0.00849965
AT5G50200	0.0194858	0.0190362
AT5G50280	-0.0222525	0.0404594
AT5G50360	-0.0961922	2.8643e-06
AT5G50720	-0.0139935	0.00887537
AT5G50900	0.0144598	0.00199786
AT5G50920	-0.00515343	0.012596
AT5G51660	-0.0111168	0.0196551
AT5G51780	0.0228706	1.32117e-10
AT5G51830	-0.0106227	0.022487
AT5G51890	-0.0183787	1.04775e-09
AT5G52060	0.00812441	0.0165566
AT5G52310	-0.0552412	4.09761e-17
AT5G52390	-0.0550377	0.000354568
AT5G52560	0.0107892	0.00711597
AT5G52790	0.0417937	0.000195036
AT5G52870	-0.0225348	0.00232232
AT5G53120	-0.0138928	6.37972e-09
AT5G53250	0.0281117	5.19219e-07
AT5G53800	-0.0165057	0.0131069
AT5G53830	-0.0209226	0.0478044
AT5G53990	-0.0213685	0.00112473
AT5G54040	0.0261787	0.0316191
AT5G54170	-0.0202462	0.0130162
AT5G54380	0.00924912	0.0357318
AT5G54390	-0.012036	0.00274813
AT5G54960	0.0135839	0.0218483
AT5G54980	-0.0182261	0.00360916
AT5G55070	-0.00678298	0.0155167
AT5G55180	-0.00864524	0.0280235
AT5G55970	0.0183884	0.000585491
AT5G56040	0.00771225	0.00870793
AT5G56090	-0.0118135	0.0464373
AT5G56630	0.0081816	0.0395516
AT5G56670	-0.00863898	0.0167461
AT5G56710	-0.0113114	0.000275494
AT5G57000	0.0306018	0.00241526
AT5G57070	0.013154	7.27298e-05
AT5G57110	-0.00684359	0.000578448
AT5G57150	0.0168932	0.000193151
AT5G57200	0.0573611	0.0174652
AT5G57220	0.0327035	1.13262e-06
AT5G57655	0.0114915	0.00674706
AT5G57685	0.0185763	0.00102264
AT5G57740	0.0116178	0.00711063
AT5G57790	-0.0333793	0.00526445
AT5G57900	-0.00916621	0.0383578
AT5G57940	0.00826341	0.0380754
AT5G58900	0.0148479	0.0484991
AT5G58910	0.0223189	0.000266244
AT5G59050	0.0126616	0.0487848
AT5G59220	-0.0422338	5.41486e-39
AT5G59320	-0.0502074	7.82538e-36
AT5G59450	0.0193136	0.0158258
AT5G59480	-0.0184474	0.000726527
AT5G59520	0.0157297	0.00406055
AT5G59680	0.0653118	8.4784e-08
AT5G59850	-0.0117002	0.00113189
AT5G60300	0.0124986	0.0200556
AT5G60660	0.0351885	2.44327e-14
AT5G60870	-0.0216552	0.0326659
AT5G60900	0.0627162	0.0282898
AT5G61010	0.0215344	4.06624e-06
AT5G61250	0.0263928	6.07735e-06
AT5G61340	0.017194	0.00369074
AT5G61350	0.0445656	0.00696677
AT5G61420	0.0334825	4.11086e-11
AT5G61820	-0.00783903	0.00328279
AT5G62270	-0.0120903	0.0321724
AT5G62490	-0.0680271	0.00647842
AT5G62530	-0.0121795	7.77504e-05
AT5G62630	0.00731514	0.0212164
AT5G62680	0.0138009	9.78941e-10
AT5G62790	-0.0116736	0.000390407
AT5G62920	0.0173641	0.000923033
AT5G63270	0.057933	0.0322469
AT5G63350	-0.0514912	2.39812e-05
AT5G63450	0.025327	1.94667e-06
AT5G63560	-0.00741834	0.00132088
AT5G63700	-0.0192853	0.0197821
AT5G63850	0.0215586	2.23646e-09
AT5G63990	0.0127948	0.0112103
AT5G64080	-0.0260962	1.4369e-05
AT5G64100	0.0332534	0.000150804
AT5G64120	0.015778	0.0114626
AT5G64250	-0.0131761	3.69917e-07
AT5G64310	-0.0142044	0.0166999
AT5G64410	0.0248548	2.76305e-06
AT5G64810	0.0263759	0.0452903
AT5G65207	-0.0150947	0.0244556
AT5G65210	0.00966874	0.00796773
AT5G65260	-0.0110093	0.0239508
AT5G65340	0.0335703	0.0326659
AT5G65430	0.00961231	8.30472e-05
AT5G65470	-0.014738	1.32411e-05
AT5G65660	0.00865766	0.0405592
AT5G65750	-0.009649	0.016299
AT5G65840	0.0119256	0.0264352
AT5G65990	-0.0235752	2.45217e-06
AT5G66460	-0.0246801	3.64142e-06
AT5G66600	0.0143696	0.0292851
AT5G66640	-0.0669973	0.021451
AT5G66690	0.0159659	1.80995e-08
AT5G66750	-0.0205067	0.00884883
AT5G66780	-0.045933	3.93709e-11
AT5G67370	-0.0187495	0.00428202
AT5G67400	0.0341541	0.00418303

## Sheet: DE - Nutrient Concentration
	log2FoldChange	padj
AT1G01060	0.0104904	0.000224755
AT1G01190	0.018354	3.70083e-05
AT1G01320	-0.0105341	0.0188855
AT1G01340	0.0247629	3.87325e-05
AT1G01470	-0.0263271	0.000219605
AT1G01580	0.027884	0.00681082
AT1G01610	0.0128145	0.000606618
AT1G02360	0.0215307	0.00459545
AT1G02500	0.00344852	0.038992
AT1G02810	0.0196993	0.000157535
AT1G02850	-0.0107448	0.00150041
AT1G02890	0.00994542	0.000190258
AT1G02900	0.0130299	0.000318293
AT1G02920	0.0135699	0.0124098
AT1G03700	0.0254603	0.00976789
AT1G03760	-0.0233496	0.0238392
AT1G03840	0.0283326	1.5148e-07
AT1G03870	0.00819622	0.0200599
AT1G04250	0.0102457	0.000144496
AT1G04280	0.00958285	0.0343759
AT1G04300	0.00646693	0.0433921
AT1G05000	0.0309559	1.71415e-12
AT1G05260	0.00865758	0.000200974
AT1G05300	0.0232844	0.0134216
AT1G05570	0.00796186	0.0382779
AT1G05680	-0.0178294	1.46769e-06
AT1G05700	0.0327981	0.0122708
AT1G06680	-0.00923947	0.0387649
AT1G07430	-0.0752744	4.52653e-06
AT1G07560	0.0250698	0.000526647
AT1G07985	-0.0437497	2.38607e-05
AT1G08380	-0.0185601	0.00170336
AT1G08650	0.0152407	1.09673e-06
AT1G08830	0.014332	0.000315746
AT1G08930	0.014892	0.00298273
AT1G09605	0.0497672	0.00157815
AT1G09740	0.00928666	0.0208286
AT1G09932	-0.032387	0.0062502
AT1G10300	0.0323119	0.0248068
AT1G10470	0.0113311	3.76991e-07
AT1G10640	-0.0222631	0.000107651
AT1G10760	-0.0159808	1.36077e-07
AT1G11420	-0.0252998	0.0116522
AT1G11670	0.0115591	0.000996542
AT1G11840	-0.0125236	5.51126e-14
AT1G12010	0.0122795	0.00981351
AT1G12040	0.0224446	0.0193273
AT1G12080	0.0095361	0.00558564
AT1G12110	0.0238282	8.09685e-12
AT1G12780	-0.00975958	0.0406152
AT1G12950	0.0186537	0.0069014
AT1G13090	-0.0162854	0.0412275
AT1G13110	0.0187716	0.00505923
AT1G13300	0.0154102	0.00315009
AT1G13420	0.0230623	7.05912e-11
AT1G13710	0.0463814	0.000501175
AT1G14120	-0.0112926	0.000319524
AT1G14160	0.0229455	0.00263327
AT1G14220	0.018803	0.0116258
AT1G14240	-0.0138223	0.00101973
AT1G14320	-0.0050411	0.0187854
AT1G14870	0.0154978	0.000479441
AT1G14960	0.0288753	2.0503e-07
AT1G15380	0.0102352	0.00280984
AT1G15540	0.0319877	6.55522e-10
AT1G16400	0.0103594	0.0181621
AT1G16500	0.0124647	0.0496823
AT1G16700	0.00744362	0.0087006
AT1G16850	-0.0393424	1.52283e-09
AT1G17180	-0.00547746	0.0325172
AT1G17190	0.0104115	0.0247331
AT1G17220	-0.0118949	0.0459674
AT1G18880	0.00960108	0.000775078
AT1G19050	0.0379938	5.35022e-26
AT1G19450	0.0165307	3.25446e-06
AT1G19570	-0.0141976	8.31402e-19
AT1G19720	-0.0215948	0.014544
AT1G19960	0.0222243	0.0412445
AT1G20160	-0.01564	3.59872e-11
AT1G20330	0.00611755	0.0379544
AT1G20380	0.00974381	0.0430425
AT1G20440	-0.0106265	0.00198305
AT1G20450	-0.0170429	7.56408e-08
AT1G20620	-0.00921527	1.48733e-05
AT1G20630	-0.0116365	0.0496823
AT1G20693	0.00558449	0.0225798
AT1G20920	0.00818068	0.027193
AT1G21010	0.014201	0.00655049
AT1G21100	0.0152392	0.00023756
AT1G21110	0.0212184	5.55378e-05
AT1G22530	0.0125915	4.55815e-08
AT1G22710	-0.0126239	0.0239223
AT1G23190	-0.00816636	0.00117994
AT1G23200	-0.0233152	0.0389319
AT1G23730	-0.0871733	1.54297e-05
AT1G25400	0.0286568	0.0372216
AT1G25480	0.0153997	0.0122203
AT1G25550	0.0229217	1.14049e-12
AT1G25560	0.0139726	0.02485
AT1G26240	0.0609286	2.56339e-07
AT1G26450	-0.0221794	2.9667e-07
AT1G27020	0.0226158	0.00643368
AT1G27140	0.0133864	0.0134216
AT1G27210	0.0147604	0.00253105
AT1G28290	-0.0101829	0.000330268
AT1G28440	0.00830815	0.0165467
AT1G28660	0.0308544	0.0253715
AT1G29025	0.0112243	0.0375511
AT1G29050	0.00824591	0.004527
AT1G29395	-0.0488032	0.00818431
AT1G29750	-0.0179255	0.00617293
AT1G29930	-0.0171218	2.3823e-12
AT1G30500	0.0188076	0.0296336
AT1G30870	0.0210143	0.000109756
AT1G31320	0.0189234	0.0116146
AT1G31660	-0.0107818	0.0429305
AT1G31935	0.0226246	0.011739
AT1G32230	0.00601735	0.00979109
AT1G32450	0.0124771	6.5516e-10
AT1G33320	0.0785713	0.0259652
AT1G35250	-0.0107534	0.029462
AT1G35255	-0.0419624	0.0315641
AT1G35515	0.0189456	0.0060935
AT1G35720	-0.00988208	3.65525e-14
AT1G36160	0.00674156	2.30771e-05
AT1G44100	0.0116142	0.0249134
AT1G44575	-0.0105227	0.0433455
AT1G45130	-0.00588413	0.0248068
AT1G45191	-0.0347926	0.000996542
AT1G45201	-0.00653289	0.00362099
AT1G47260	-0.0056485	0.0259987
AT1G47600	0.0113776	0.0318788
AT1G47710	-0.0116372	0.0119014
AT1G47960	-0.0289305	0.00098055
AT1G48100	-0.0333181	2.15068e-05
AT1G48300	0.00798218	0.00248654
AT1G48660	-0.0756251	0.00594053
AT1G49720	-0.0237094	0.00920764
AT1G49750	0.0232572	0.0326105
AT1G49860	0.0175701	0.000131506
AT1G51070	0.00777493	0.026063
AT1G51140	-0.0114795	0.00307437
AT1G51200	0.00713303	0.022182
AT1G51340	0.0204747	0.002084
AT1G51470	0.0108983	0.000108114
AT1G51500	-0.0195844	0.00585255
AT1G51790	0.0168443	0.023407
AT1G51830	0.0231607	1.91306e-09
AT1G51850	0.0161584	0.0112013
AT1G51860	0.0164282	0.0496823
AT1G51890	0.0297292	0.000112116
AT1G52100	-0.0444618	0.0199945
AT1G52200	0.02693	9.3307e-07
AT1G52400	-0.0310161	0.0165467
AT1G52690	-0.0334078	0.000218462
AT1G52800	0.0280239	0.00379812
AT1G52820	0.0207292	1.75757e-06
AT1G53470	-0.0115449	0.0358147
AT1G53940	0.0445679	0.0356064
AT1G54100	-0.00738976	0.000238021
AT1G54160	-0.0668096	0.0388421
AT1G54410	-0.00669789	0.0052533
AT1G54575	-0.0176565	0.0270129
AT1G54830	-0.017698	0.00647542
AT1G55740	-0.00932236	0.0428492
AT1G55920	-0.0106597	0.00727904
AT1G55990	0.0156183	0.000108414
AT1G56220	-0.0163877	1.08285e-11
AT1G56600	-0.0448942	8.48332e-08
AT1G58270	-0.00572209	0.00375079
AT1G58320	0.0168324	0.0143907
AT1G58360	-0.00873186	0.0379544
AT1G59940	0.0178146	0.0323443
AT1G59960	-0.0124729	0.000840999
AT1G59970	0.0140802	0.0386971
AT1G60470	-0.031628	7.95432e-09
AT1G60950	-0.0136891	0.0112724
AT1G61560	0.0296799	0.0104481
AT1G61890	-0.00954109	0.0121403
AT1G62380	0.00966899	4.59716e-05
AT1G62540	-0.0201615	0.000116458
AT1G62570	-0.0169152	7.12088e-09
AT1G62710	-0.0129567	0.0357581
AT1G62770	-0.0182764	6.84119e-05
AT1G62975	0.0183219	9.09423e-10
AT1G63000	0.00603166	0.0064613
AT1G63010	-0.00957366	0.000689267
AT1G63980	-0.0106712	0.0212667
AT1G64060	0.00787247	0.0188547
AT1G64140	0.00770757	0.0270475
AT1G64390	0.00912896	0.000111695
AT1G64530	0.00863212	0.00117851
AT1G64590	0.0229229	1.53481e-21
AT1G64780	0.0214681	3.01579e-12
AT1G65310	0.0239097	4.01879e-05
AT1G65840	0.0101863	1.11438e-06
AT1G65845	0.0154208	0.014182
AT1G66020	-0.0176535	0.0379544
AT1G66190	0.0188024	0.0431853
AT1G66200	0.0204853	3.53166e-10
AT1G66280	-0.00659441	0.000383282
AT1G66840	-0.0582726	0.0282167
AT1G67110	0.0376368	4.34027e-10
AT1G67148	0.0267376	0.00165062
AT1G67710	-0.0134608	0.00930087
AT1G67810	0.0145044	0.0496823
AT1G67870	0.0115288	7.66587e-10
AT1G67980	0.0326923	0.0053714
AT1G68040	0.0236276	0.000318293
AT1G68530	-0.0226783	0.00124022
AT1G68560	-0.00845349	0.0238678
AT1G68620	0.0204391	4.20214e-07
AT1G68670	0.0199233	7.30561e-12
AT1G69230	-0.0162598	0.00172766
AT1G69260	-0.0156886	0.00692922
AT1G69530	-0.0128369	0.00753117
AT1G69810	0.012562	0.0334237
AT1G69880	-0.0399946	1.41032e-05
AT1G70410	0.00979389	0.0332191
AT1G70590	0.0127975	0.0473689
AT1G70710	-0.0145489	3.3171e-05
AT1G70740	0.0158444	0.00176035
AT1G70900	0.010205	0.0266822
AT1G71870	0.0156236	2.85398e-05
AT1G71880	0.0224192	1.10288e-13
AT1G72300	0.00933441	0.047906
AT1G72500	0.013503	8.85238e-06
AT1G72510	0.00745542	0.00983347
AT1G72680	-0.00978738	0.0270475
AT1G72890	0.0237752	0.0278142
AT1G73280	0.0258916	0.0031974
AT1G73480	-0.0243494	4.26346e-10
AT1G73600	0.0108814	0.0118408
AT1G73920	-0.0091929	0.00651064
AT1G74460	0.00744916	0.0126055
AT1G74470	-0.00821471	0.0262745
AT1G75280	-0.00892442	0.0430144
AT1G75450	0.0137767	0.0223782
AT1G75750	0.0177343	3.22188e-16
AT1G75820	-0.00887204	0.00376049
AT1G75850	0.00822275	0.0457854
AT1G76180	-0.00761193	0.0231473
AT1G76580	-0.0120278	0.0430599
AT1G76590	-0.0223311	0.0060935
AT1G76680	0.0107116	1.39889e-05
AT1G76790	-0.00740187	0.00139085
AT1G76930	-0.0179125	0.0125505
AT1G76990	0.0152628	2.72603e-05
AT1G77120	-0.036562	1.44959e-20
AT1G77530	0.015384	7.54576e-05
AT1G77690	0.0111886	0.00799115
AT1G77940	-0.00632419	0.038992
AT1G78020	0.0173485	0.000178262
AT1G78100	0.0105381	0.0499646
AT1G78580	0.0072314	0.00391853
AT1G78990	0.0111438	0.0052533
AT1G79520	-0.0197	0.000144069
AT1G79970	-0.0119177	0.022327
AT1G80160	-0.0502036	0.0199396
AT1G80920	0.00893594	0.0228474
AT2G01080	0.010396	0.0395452
AT2G01180	0.0204407	6.00316e-05
AT2G01190	0.011578	0.0394479
AT2G01610	-0.023588	0.00265984
AT2G01620	-0.0327735	0.0391301
AT2G01660	0.0172864	0.000151155
AT2G01680	0.0108815	0.0374182
AT2G01818	0.0305808	0.021112
AT2G01830	0.0076451	0.00593632
AT2G01950	0.0072889	0.00573728
AT2G02100	-0.0114976	0.000111695
AT2G02120	-0.0186511	0.000223826
AT2G02800	0.0133254	0.000169708
AT2G03730	0.00906387	0.00677091
AT2G03760	-0.0155717	0.020014
AT2G03865	0.0322446	0.0188547
AT2G04070	0.0571231	0.00143011
AT2G04170	0.0104267	0.00267721
AT2G04350	-0.00884944	0.00585255
AT2G05310	-0.0437884	0.0152174
AT2G05440	-0.00841056	0.000150803
AT2G05510	-0.0245708	1.22992e-18
AT2G05520	-0.064003	0.00631094
AT2G05790	-0.00851677	0.0482007
AT2G07180	0.0128599	0.014363
AT2G13810	0.0350511	0.000231836
AT2G14750	0.00582779	0.0287278
AT2G15370	0.0208952	0.0100448
AT2G15970	-0.014608	2.84099e-10
AT2G16005	-0.0160827	1.36521e-05
AT2G16500	0.00724276	0.00348056
AT2G16600	-0.00738202	0.0299186
AT2G16750	0.0118879	0.00213032
AT2G16980	0.015397	7.94363e-06
AT2G17430	0.0244557	0.000256825
AT2G17820	0.0114586	2.06555e-05
AT2G18150	-0.0176327	1.85939e-08
AT2G18160	0.00580935	0.0410756
AT2G18360	-0.0170748	0.000524519
AT2G18550	-0.0342152	0.00565577
AT2G18590	-0.0852297	0.0041927
AT2G18800	0.0140558	0.00265984
AT2G19900	-0.0294855	1.00203e-07
AT2G19970	-0.028949	7.68684e-07
AT2G20050	-0.0127193	0.0193049
AT2G20080	0.0144141	0.0176744
AT2G20230	0.00877195	0.0093062
AT2G20670	0.0155748	0.0131479
AT2G20890	-0.0152204	0.000265679
AT2G21045	0.0118231	0.00734924
AT2G21880	0.0215122	0.0343597
AT2G22240	-0.0115373	0.00429253
AT2G22430	-0.00775816	0.0374182
AT2G22980	0.0493104	0.0109148
AT2G23120	-0.0148384	3.16511e-11
AT2G23540	0.00690369	0.00339622
AT2G23610	-0.0154748	0.000337549
AT2G23630	0.0153136	0.0128755
AT2G23910	0.0229951	0.00249081
AT2G24720	0.0327372	0.0321247
AT2G24980	0.0670683	0.00640864
AT2G25150	0.0270963	1.48026e-07
AT2G25160	0.0195875	2.29093e-14
AT2G25260	0.0123113	0.0266284
AT2G25450	-0.0120078	1.78581e-18
AT2G25490	0.00880032	0.038326
AT2G26510	0.00975357	0.00582847
AT2G26560	0.0251949	0.0151683
AT2G26660	0.0120087	0.0372008
AT2G26690	-0.0231293	9.27652e-13
AT2G27020	-0.00875385	0.00709702
AT2G27040	-0.00886361	0.0296565
AT2G27285	-0.012267	0.0362254
AT2G27402	0.0288735	0.0428492
AT2G28250	0.0126647	0.000569411
AT2G28370	0.0111178	0.0148537
AT2G28470	0.0230228	2.25564e-17
AT2G28720	0.0134635	0.0343657
AT2G28900	-0.024228	0.000318293
AT2G28960	0.0245642	6.84119e-05
AT2G29130	0.0192828	0.0235419
AT2G29440	-0.0167555	0.0165984
AT2G29660	0.0166398	1.61557e-05
AT2G29750	0.0127415	0.000524519
AT2G29995	0.0272342	0.00285211
AT2G30500	-0.0101173	0.0205938
AT2G30520	0.0098256	0.00523032
AT2G30930	0.0109941	0.0058779
AT2G31020	0.013042	0.0327891
AT2G32150	0.00992437	0.0101945
AT2G32960	0.0128322	0.00213032
AT2G33790	-0.0154636	0.00912785
AT2G33850	-0.0082902	0.00492082
AT2G34430	0.0368905	0.0100448
AT2G34660	0.00878077	4.16893e-06
AT2G35000	0.0188982	0.0053049
AT2G35270	0.023144	0.0018649
AT2G35770	0.022013	2.607e-06
AT2G35930	0.0380975	0.0101945
AT2G36100	0.0121899	0.0253848
AT2G36120	0.011576	0.00940088
AT2G36290	0.00856325	0.000223826
AT2G36390	-0.0128397	0.00315842
AT2G36880	0.00629164	1.63766e-07
AT2G37040	0.0092185	0.00167161
AT2G37420	-0.0157397	0.0479602
AT2G37710	0.0101924	0.0116522
AT2G37750	0.0143131	0.00563065
AT2G37760	-0.0110756	0.00477302
AT2G37770	-0.0241129	0.0022572
AT2G37900	-0.0376067	9.17942e-10
AT2G37980	0.0168884	0.030341
AT2G38080	0.0136081	0.00287519
AT2G38120	0.0117869	2.30233e-05
AT2G38180	0.0124932	0.0217683
AT2G38300	0.0220363	0.0278142
AT2G38380	-0.00855162	0.000845043
AT2G38390	-0.0156834	3.05346e-08
AT2G38530	-0.0259465	5.97799e-05
AT2G39210	0.0126727	0.0247331
AT2G39310	-0.0190181	8.12556e-12
AT2G39350	-0.0118569	0.00618516
AT2G39530	0.0217086	0.00982701
AT2G39705	0.0323346	0.000265305
AT2G39800	-0.0244069	1.57408e-16
AT2G40230	0.0173273	0.0482058
AT2G40540	-0.011048	0.0241249
AT2G41190	-0.0161297	0.0372008
AT2G41310	0.0112716	0.0237431
AT2G41480	0.0162571	2.38607e-05
AT2G41640	0.0149616	0.0300012
AT2G41810	-0.0925328	0.000783455
AT2G42060	0.0281041	0.0147085
AT2G42350	0.0214685	0.0110282
AT2G42540	-0.0553095	2.159e-17
AT2G42910	-0.0106715	0.0196881
AT2G43100	0.00978062	0.0305021
AT2G43150	0.0116949	6.78208e-05
AT2G43500	0.0129622	0.00211202
AT2G43510	0.0338394	2.80424e-08
AT2G43535	-0.00992059	3.23946e-05
AT2G43570	0.0155996	0.02861
AT2G43620	-0.065664	0.0319693
AT2G43680	0.00489991	0.0213008
AT2G43840	-0.0308344	0.038326
AT2G43890	-0.056895	0.0428899
AT2G43910	0.00618839	0.0020074
AT2G44060	-0.00666853	0.021376
AT2G44120	-0.00552717	0.0496823
AT2G44340	0.0785573	0.00496879
AT2G44670	0.0150294	0.000148316
AT2G44790	0.0078711	0.0202695
AT2G44940	0.00763237	0.0316985
AT2G45470	0.00866545	0.0322627
AT2G45550	0.0625511	0.00876164
AT2G45740	-0.0325138	0.0142795
AT2G45920	0.00759623	0.0214657
AT2G46370	0.0060519	0.0482058
AT2G46650	0.0183524	7.54939e-05
AT2G46660	0.0282778	0.00280984
AT2G46680	-0.0207733	0.00117994
AT2G46890	0.0128788	0.0297244
AT2G47000	0.00586723	0.0156328
AT2G47010	-0.016118	0.0319693
AT2G47130	0.0206836	1.31927e-05
AT2G47180	-0.00823597	0.00125358
AT2G47630	-0.00943361	0.023586
AT2G47780	-0.0747782	0.00103015
AT2G47890	0.00668386	0.0212667
AT2G48030	0.0183423	7.68468e-06
AT2G48130	0.0161385	1.21782e-05
AT2G48140	0.015148	5.34876e-05
AT3G01290	0.0269863	4.74659e-13
AT3G01500	0.0375357	0.00406766
AT3G02020	0.0196686	2.2679e-05
AT3G02040	0.0461758	5.31773e-32
AT3G02100	0.0221816	0.0270716
AT3G02480	-0.0400659	0.0071111
AT3G02930	-0.0156348	0.0319693
AT3G03150	-0.00960634	0.0497778
AT3G03640	-0.0119452	0.0115945
AT3G03680	0.0138978	0.0205191
AT3G03780	0.00961958	1.08851e-07
AT3G03910	0.0618777	6.17691e-05
AT3G04320	-0.0181255	0.0343597
AT3G04530	0.0267859	0.00411318
AT3G04920	-0.00782949	0.0392427
AT3G05200	0.0160257	0.0192685
AT3G05640	-0.0156939	0.000783455
AT3G05650	-0.0203229	0.0287853
AT3G05840	0.00688391	0.0193049
AT3G05880	-0.011245	0.00519306
AT3G06170	0.0102917	0.010494
AT3G06510	-0.0100719	0.00510394
AT3G07540	-0.0179426	0.022445
AT3G07570	0.00983044	0.0441221
AT3G07720	0.0133705	0.000569477
AT3G08030	-0.0108727	1.41032e-05
AT3G08650	0.00795328	0.0473339
AT3G08860	-0.0320857	2.8957e-12
AT3G09400	0.0642307	5.68713e-06
AT3G09820	-0.00614916	0.00371602
AT3G10020	-0.015666	0.0005473
AT3G10040	-0.0315839	0.0234595
AT3G10200	-0.0294761	0.0343759
AT3G10420	0.013545	0.025533
AT3G10500	0.00790049	0.00383524
AT3G10960	0.0135607	0.0282167
AT3G10985	0.0169561	3.58519e-14
AT3G11280	0.0131179	0.000326571
AT3G11430	0.0124313	0.0031974
AT3G12110	0.0110004	0.0487279
AT3G12120	-0.00688451	0.0224612
AT3G12200	0.00927091	0.0324119
AT3G12780	-0.0102183	0.022145
AT3G12900	0.0617149	0.0014598
AT3G13310	0.0121802	4.92012e-05
AT3G13435	0.0204332	0.0285929
AT3G13580	-0.00674374	0.0467467
AT3G13610	0.0236105	1.93174e-09
AT3G13760	0.0379124	0.00108798
AT3G13784	-0.0508125	4.5754e-08
AT3G13790	0.00789647	0.0119278
AT3G13840	0.0317358	0.0305736
AT3G14230	-0.00939043	0.000637335
AT3G14890	-0.00955801	0.0374182
AT3G14940	0.0115848	4.11255e-05
AT3G15010	0.00869081	0.036021
AT3G15353	0.0146507	0.00318653
AT3G15630	0.0210383	0.0300012
AT3G15670	-0.082927	0.00256653
AT3G15790	-0.0149491	0.0251768
AT3G16090	0.0141607	0.0052844
AT3G16150	0.0364411	0.00378544
AT3G16240	0.0153288	6.89971e-07
AT3G16390	0.0281306	3.09852e-12
AT3G16400	-0.00991858	2.30771e-05
AT3G16430	-0.00988088	2.81462e-06
AT3G16440	0.01217	0.0497617
AT3G16450	-0.0114792	7.38999e-07
AT3G16470	-0.00909864	7.22371e-05
AT3G16520	-0.0162344	0.0107092
AT3G16690	0.0201137	0.0101945
AT3G17410	0.00833329	0.0329976
AT3G17420	0.0113377	0.00727229
AT3G17790	0.0119634	0.0122203
AT3G18280	-0.0109518	1.77258e-05
AT3G18560	0.017015	0.00104331
AT3G18780	0.00621512	0.000501961
AT3G19430	-0.0154634	0.0271556
AT3G19450	0.00825992	0.00552031
AT3G19710	0.0132446	9.5129e-05
AT3G19970	0.029914	0.000112983
AT3G20100	-0.0142771	0.000293901
AT3G20300	-0.025484	0.00297936
AT3G20380	0.0243943	0.0347476
AT3G20500	-0.0134629	0.00945069
AT3G21240	0.00649467	0.0301592
AT3G21770	-0.00694555	0.0262745
AT3G22240	0.0236438	1.15982e-09
AT3G22600	0.0164373	2.94123e-11
AT3G22620	0.0154131	1.41786e-05
AT3G22845	0.0070503	0.0242876
AT3G22890	0.00585588	0.0069014
AT3G23030	-0.0143082	0.002068
AT3G23090	0.0117308	0.00266379
AT3G23190	0.0165199	0.0496823
AT3G23530	0.0119785	0.0207919
AT3G23640	-0.00834062	0.0193154
AT3G25150	-0.00851544	0.0052533
AT3G25290	-0.00883562	0.0425924
AT3G25520	-0.00632325	0.00326378
AT3G25585	0.0121761	1.58139e-05
AT3G25920	-0.0168089	0.0157462
AT3G26040	0.020512	0.0161876
AT3G26060	-0.0356298	0.000148197
AT3G27150	0.0210714	5.26964e-05
AT3G27190	0.00960603	0.00722756
AT3G27250	-0.0314602	0.000160638
AT3G27690	0.0275714	0.023586
AT3G27870	-0.0178575	0.00144016
AT3G27880	0.0108242	0.0266193
AT3G28345	0.011711	0.00994511
AT3G28510	0.01581	0.00221547
AT3G29180	-0.00825877	0.0262745
AT3G29250	0.0102853	0.00921277
AT3G29320	-0.0162309	0.0170587
AT3G29390	0.00867569	0.0358147
AT3G29410	0.0104663	0.0250215
AT3G29575	-0.0109777	0.0151025
AT3G30300	-0.00969562	0.0229218
AT3G32040	0.0417968	0.000189348
AT3G44510	0.0227612	0.000600362
AT3G44550	0.00728305	0.0419849
AT3G44720	0.0106443	3.0432e-05
AT3G44990	0.0106498	9.43075e-07
AT3G45130	0.0183927	2.69425e-06
AT3G45700	0.0156792	0.0164935
AT3G45710	0.0113734	0.00978916
AT3G46040	-0.0117661	0.000501961
AT3G46700	-0.0105338	1.54297e-05
AT3G46880	0.0445881	0.00132683
AT3G47220	0.015313	0.0362254
AT3G47420	0.0253176	1.26738e-20
AT3G47470	-0.0137915	6.14208e-09
AT3G47740	0.0401351	0.0332191
AT3G47780	0.0159564	2.95111e-05
AT3G47820	0.015608	0.0421607
AT3G48100	0.0285651	1.1293e-08
AT3G48140	0.0078237	0.00968772
AT3G48350	-0.0196907	0.00367674
AT3G48510	-0.033231	0.00271845
AT3G49120	-0.0113656	0.00114312
AT3G49210	0.0141015	0.0300012
AT3G49220	-0.0110986	0.00583454
AT3G49330	0.0210216	0.00711563
AT3G49940	0.0170032	5.15278e-06
AT3G50260	0.0275608	0.00591003
AT3G50300	0.0133932	1.4474e-06
AT3G50350	0.0300997	3.8853e-07
AT3G50740	0.0282596	1.31684e-13
AT3G50970	-0.024203	1.16022e-17
AT3G51330	0.0179276	0.0052533
AT3G51740	-0.011666	0.0300012
AT3G51750	-0.0508056	6.14208e-09
AT3G51860	-0.0154637	0.00981351
AT3G52190	0.0124102	0.0209278
AT3G52250	0.00864636	0.0430144
AT3G52480	0.023559	0.0495037
AT3G52560	0.00734772	0.0319693
AT3G52590	-0.00706654	0.0142795
AT3G52930	0.00708295	7.62811e-05
AT3G52970	0.0273267	1.77333e-06
AT3G53150	0.0283488	0.0165669
AT3G53480	0.00872825	0.022182
AT3G53510	0.0112012	0.0205191
AT3G53540	-0.0131954	0.035611
AT3G53980	-0.0156994	1.41786e-05
AT3G54040	0.0263952	6.14656e-14
AT3G54260	-0.0261887	1.98747e-23
AT3G54720	0.022208	6.38209e-12
AT3G54820	-0.0205059	0.000547936
AT3G54920	-0.0113196	0.0497698
AT3G55230	0.00793643	0.0428492
AT3G56020	-0.00999425	0.0278015
AT3G56360	0.016234	0.000524519
AT3G56400	0.0241332	0.0370409
AT3G56940	-0.011263	0.00464795
AT3G57010	-0.0110342	2.30771e-05
AT3G57330	0.0112166	0.00284366
AT3G58990	0.0213683	2.37061e-08
AT3G59370	0.0121912	0.00795118
AT3G60070	0.0125412	0.022386
AT3G60140	-0.0313117	1.55499e-06
AT3G60330	0.024151	0.000207692
AT3G60450	0.00792483	0.0431115
AT3G61260	0.00889734	0.0114985
AT3G61390	0.0236797	0.0483581
AT3G61490	-0.0178624	0.00218974
AT3G62010	-0.00954563	0.0055564
AT3G62040	0.00640748	0.0387649
AT3G62680	0.0313503	0.00757856
AT3G62700	-0.0106324	4.9674e-06
AT3G62730	-0.0266608	0.0482007
AT3G62740	-0.0229461	1.12266e-08
AT3G63380	0.02446	0.000783055
AT4G00680	0.0292531	0.0180245
AT4G00910	-0.023061	0.00108798
AT4G01390	-0.0225169	4.01262e-05
AT4G01450	0.00988759	0.0331076
AT4G01630	-0.0261959	0.00224942
AT4G01800	-0.00932423	0.0266284
AT4G02075	0.0271874	0.00172766
AT4G02270	0.0612615	0.00206027
AT4G02280	-0.02016	4.44125e-07
AT4G02290	-0.0126447	2.20467e-06
AT4G02330	-0.0145766	0.00647542
AT4G02380	-0.0106035	0.0052533
AT4G02850	0.0231675	2.06555e-05
AT4G03280	-0.0178359	0.0108295
AT4G03420	-0.0124763	0.026063
AT4G04840	0.0221901	1.08489e-05
AT4G04955	0.015319	0.000144858
AT4G04990	0.0218369	0.0164935
AT4G05200	0.0215737	5.29359e-07
AT4G08150	-0.0180308	0.0113604
AT4G08300	0.0358185	0.0251768
AT4G10300	-0.0199472	0.0497617
AT4G10310	-0.0484912	1.47692e-12
AT4G10340	-0.012552	0.000793938
AT4G10360	0.0153124	0.026927
AT4G11210	0.0219564	7.64514e-08
AT4G11290	0.0108231	0.0233443
AT4G11600	0.00578601	0.0478705
AT4G12030	0.0159796	0.00595424
AT4G12040	0.0101316	0.0172857
AT4G12310	-0.0602547	0.0387649
AT4G12430	-0.0220123	0.0430425
AT4G12470	-0.0568352	0.0199307
AT4G12480	-0.0917162	2.14665e-08
AT4G12510	0.016054	0.0129753
AT4G12520	0.0131686	0.000243358
AT4G12730	0.0143004	7.34645e-07
AT4G13290	-0.0142521	0.000614641
AT4G13420	0.0579326	0.00979109
AT4G13615	0.00737992	0.0430425
AT4G13770	0.0135295	9.45756e-06
AT4G13930	0.00732409	2.78582e-07
AT4G14020	-0.0284062	0.00289146
AT4G14030	-0.00621356	0.00718829
AT4G14060	-0.0144028	2.50109e-06
AT4G14090	-0.0334715	0.0356064
AT4G14270	-0.018134	2.6706e-05
AT4G14465	0.0114221	0.0053187
AT4G14580	0.0143822	5.26977e-05
AT4G14630	0.01649	0.041285
AT4G14740	0.0134949	0.00813778
AT4G14880	0.0048711	0.0176445
AT4G15640	-0.01859	0.0169405
AT4G15780	-0.00882691	0.0337138
AT4G15910	-0.0107263	7.08907e-05
AT4G16370	0.0214658	4.91719e-07
AT4G16380	0.0083155	0.0492087
AT4G17080	0.0101317	0.0382779
AT4G17460	0.0153652	0.000337549
AT4G17550	-0.0135274	0.0313523
AT4G17800	0.0108445	0.000688507
AT4G17870	0.0112246	0.0050661
AT4G18100	-0.00709399	0.00932695
AT4G18280	-0.0261644	0.0122203
AT4G18510	0.0156193	0.0272657
AT4G18930	0.00975925	0.0223271
AT4G18950	0.00850847	0.0487279
AT4G19230	-0.0148412	0.000644247
AT4G19660	0.013219	0.0076399
AT4G19690	0.0256944	0.00102605
AT4G19810	-0.017264	9.03629e-09
AT4G19840	-0.023219	2.37061e-08
AT4G20110	0.0126065	0.0059424
AT4G20240	0.0160979	8.35968e-05
AT4G20260	0.00864619	0.0428492
AT4G20390	0.0115928	0.000783455
AT4G21105	0.00763382	0.00618516
AT4G21850	0.00737232	0.00970817
AT4G22120	0.0094508	0.0138936
AT4G22240	-0.00725556	0.0415239
AT4G22666	0.0167063	0.0124183
AT4G22730	-0.0242796	0.0164935
AT4G22880	-0.0375357	4.45349e-05
AT4G22930	-0.00950427	0.0140077
AT4G23270	0.0138793	0.000630682
AT4G23400	0.0118912	0.00213032
AT4G23500	-0.0122289	0.00120295
AT4G23670	-0.011673	2.27544e-12
AT4G23700	0.0186916	3.38699e-06
AT4G23980	0.0107402	0.0122957
AT4G24020	0.0105381	0.00290852
AT4G24130	0.0136773	8.97584e-06
AT4G24240	0.00922782	0.0241249
AT4G24960	-0.0162705	1.41032e-05
AT4G25090	0.0247203	0.038992
AT4G25400	0.019859	6.42598e-07
AT4G25410	0.0289586	0.00987339
AT4G25640	0.0097009	0.00010086
AT4G26320	0.0148098	5.97799e-05
AT4G26810	-0.0400061	0.0247789
AT4G27260	0.0215865	0.00645411
AT4G27440	-0.039343	7.59874e-06
AT4G27520	-0.0138004	0.00821494
AT4G28040	-0.0179891	0.0218367
AT4G28410	-0.0212935	0.00394487
AT4G28840	0.0166453	0.0165467
AT4G29190	-0.0171505	5.83091e-05
AT4G29310	0.0183865	0.0171125
AT4G29740	0.0218362	0.00010086
AT4G29800	0.0195611	0.00519252
AT4G29905	0.0142673	8.53494e-05
AT4G30110	0.0172485	0.0147224
AT4G30190	0.011742	1.3391e-06
AT4G30210	0.00569056	0.0312864
AT4G30280	0.0188319	0.0002077
AT4G30650	-0.0209627	3.23522e-05
AT4G30670	0.0178148	0.0310219
AT4G30830	-0.0437563	0.0143131
AT4G30960	-0.00687787	0.0165984
AT4G31290	-0.00895899	0.00190005
AT4G31330	-0.0245318	0.045864
AT4G31500	0.00770511	0.0300012
AT4G31550	0.00861347	0.0300012
AT4G31570	0.00778046	0.0129717
AT4G31920	0.00959954	0.00819857
AT4G31940	0.0323185	0.000214313
AT4G31970	0.0477954	6.14208e-09
AT4G32270	0.0119818	0.043337
AT4G33150	-0.00887999	0.00157162
AT4G33540	-0.00961944	0.0487279
AT4G33550	-0.0401179	1.74306e-18
AT4G33610	0.0170866	0.000823334
AT4G33770	0.0191101	0.0126851
AT4G34220	-0.0185334	0.043313
AT4G34250	-0.0390802	0.0236441
AT4G34590	0.0159733	0.000168838
AT4G34650	-0.0435167	0.00486018
AT4G34710	-0.0108632	1.46085e-06
AT4G35030	0.0149258	0.00257755
AT4G35060	0.00857033	0.0267524
AT4G35160	0.00874961	0.000104248
AT4G35300	-0.00893662	0.00734924
AT4G35750	0.014848	0.000307562
AT4G35790	-0.0069568	0.00458552
AT4G35985	0.0195085	0.022445
AT4G36040	0.0107561	0.021376
AT4G36430	-0.0203504	7.85862e-15
AT4G36610	0.0140578	0.000200974
AT4G36740	-0.0300681	0.00159798
AT4G36800	0.00607141	0.0453323
AT4G36920	0.00863543	0.0305736
AT4G36990	0.00786223	0.0212864
AT4G37030	0.0338801	0.000419428
AT4G37160	0.0143583	0.0134216
AT4G37180	-0.0110258	0.00172735
AT4G37190	-0.0147855	0.0294849
AT4G37300	-0.0154974	9.18311e-06
AT4G37550	-0.01367	0.0052533
AT4G37800	-0.00828386	0.00235952
AT4G37870	-0.00637213	0.000163424
AT4G37900	0.027126	0.0124183
AT4G37970	-0.0406986	2.60217e-08
AT4G38370	-0.0273029	0.0343759
AT4G38470	0.00867993	0.0167907
AT4G38620	0.011785	0.00169038
AT4G38640	0.00980095	0.0326105
AT4G38680	0.00876002	0.0120567
AT4G38810	-0.00741358	0.0396401
AT4G38960	0.0144058	0.0412275
AT4G39030	0.0112056	0.00256653
AT4G39200	-0.00531664	0.0362254
AT4G39210	-0.0182835	0.00544711
AT4G39260	0.0184983	3.58519e-14
AT4G39770	0.0184847	0.0182129
AT4G39940	0.0145595	4.48893e-07
AT4G40010	0.0151131	0.012946
AT5G01220	0.0135654	0.000294656
AT5G01340	0.0114947	0.0451541
AT5G01600	-0.01666	0.000707261
AT5G01720	0.00992671	0.00239569
AT5G01830	0.0162187	0.000318293
AT5G02090	0.0181328	0.0193154
AT5G02240	-0.0107161	0.0382779
AT5G02270	0.0147065	2.07314e-07
AT5G03240	0.00684814	0.00255407
AT5G03380	0.0152248	2.92139e-06
AT5G03545	0.0269704	6.59595e-06
AT5G03630	0.00714975	0.000163175
AT5G04120	0.0378703	8.71186e-11
AT5G04740	0.00830973	0.0205191
AT5G04770	0.0106961	0.0494505
AT5G04885	-0.0293691	0.000124885
AT5G04950	0.0177196	0.000326457
AT5G04960	0.0240185	0.00618516
AT5G05960	-0.0112535	0.00108782
AT5G06300	0.0177324	9.59518e-05
AT5G06530	-0.0267241	0.0141575
AT5G06630	0.0768287	0.0112875
AT5G06760	-0.0637876	4.97826e-14
AT5G06900	0.0204634	0.000163738
AT5G06905	0.0289761	0.000426942
AT5G07130	0.01538	0.000779735
AT5G07330	-0.0556836	0.0468959
AT5G07460	0.0102306	0.0309194
AT5G08240	0.0148955	0.00595771
AT5G08260	-0.0172474	0.000302162
AT5G08560	0.0091442	0.000626975
AT5G08790	0.0145127	4.47042e-05
AT5G09220	-0.00870848	0.000746627
AT5G09530	0.00969588	0.00655049
AT5G09900	-0.0066859	0.0382211
AT5G10180	-0.0208946	6.58599e-08
AT5G10230	0.0243551	1.33765e-13
AT5G10580	-0.00847305	0.00882563
AT5G10860	-0.00536165	0.0149508
AT5G11110	-0.0159321	2.67729e-07
AT5G11570	0.020106	0.00231107
AT5G11580	-0.0104154	0.0320989
AT5G11670	0.0125603	2.1035e-05
AT5G12140	-0.0123129	2.79496e-07
AT5G12350	-0.00947421	0.0214788
AT5G12420	0.0128507	0.00128386
AT5G12900	-0.011736	0.023586
AT5G13360	-0.0172177	0.00853397
AT5G13370	-0.0208763	0.000178324
AT5G13580	0.0152865	4.72425e-05
AT5G13980	-0.00826151	0.0207305
AT5G14070	0.0377267	0.014182
AT5G14130	0.013028	0.00097947
AT5G14200	0.0110334	3.82221e-05
AT5G14340	0.034454	0.0312864
AT5G14430	0.00889955	0.0266542
AT5G15130	0.0121717	0.0432192
AT5G15960	-0.0443963	1.39435e-12
AT5G15970	-0.0265531	9.42327e-18
AT5G16040	-0.0181498	1.08579e-06
AT5G16970	-0.0179325	0.0031974
AT5G17230	0.0101365	0.0270475
AT5G17330	0.00589982	0.0287031
AT5G17450	0.0314627	0.00108087
AT5G17460	-0.0166315	6.25712e-08
AT5G18310	0.0100181	0.00618516
AT5G18670	0.0176502	0.0388421
AT5G19120	0.0179972	0.00111908
AT5G19240	0.0136766	0.0241249
AT5G19260	0.0179064	0.0281551
AT5G19440	-0.0065445	0.00753117
AT5G19530	-0.00982952	0.00245202
AT5G19600	0.010105	0.0129103
AT5G19730	-0.0126121	0.0487279
AT5G19875	-0.0108941	0.0237438
AT5G19980	0.0121328	0.0106779
AT5G20150	0.0571786	1.11078e-05
AT5G20250	0.0175185	0.00459257
AT5G20400	0.0134876	0.0157834
AT5G20710	-0.0192547	0.0499646
AT5G20790	0.0373688	1.63161e-07
AT5G20830	-0.026998	9.69788e-20
AT5G20885	0.0130635	0.000837736
AT5G20960	0.00755706	0.000220365
AT5G21940	0.013747	0.0279201
AT5G22410	0.0364882	0.022327
AT5G22500	-0.0151847	0.00117994
AT5G22630	0.0087888	0.000697363
AT5G22640	-0.0126525	0.000928969
AT5G23740	-0.00643958	0.0362254
AT5G23750	0.0137232	0.0248068
AT5G23820	-0.0107428	2.92139e-06
AT5G24140	0.0309101	0.0451453
AT5G24530	0.0126853	6.9265e-05
AT5G24660	-0.0136129	0.0120857
AT5G24760	0.00924926	0.0387402
AT5G24770	-0.0256932	1.47204e-22
AT5G24780	-0.0112063	0.000208526
AT5G25140	-0.0437289	7.99006e-05
AT5G25250	0.0249268	0.0468959
AT5G25610	-0.0222807	0.0002086
AT5G25620	0.0211109	0.000405974
AT5G25900	-0.0219833	0.00333987
AT5G26000	0.0405598	0.00323687
AT5G26340	-0.012881	0.0487279
AT5G26740	0.0108678	0.0114985
AT5G26850	-0.00884724	0.045886
AT5G26920	0.0259245	0.000189348
AT5G28060	-0.00717926	0.0431853
AT5G28510	-0.037055	8.00669e-06
AT5G28520	-0.0401826	0.00130207
AT5G35190	0.0365583	0.000262065
AT5G35200	0.00619394	0.0300012
AT5G35790	-0.0297489	0.00234351
AT5G36130	0.0322145	1.12306e-06
AT5G36140	0.0430537	6.40207e-16
AT5G36180	0.0133134	3.17869e-05
AT5G37500	-0.017774	2.06507e-05
AT5G37790	0.0118851	0.00450489
AT5G38020	-0.00733615	5.2297e-05
AT5G38420	0.0449588	0.0127095
AT5G38910	0.0441987	5.97348e-11
AT5G39050	-0.0215869	0.00413905
AT5G39740	-0.00470321	0.0209278
AT5G40800	-0.0399137	0.00132683
AT5G41040	0.011092	0.000349701
AT5G41080	0.0215443	0.000156915
AT5G41410	0.0186282	0.0270475
AT5G42500	0.0187679	0.000338847
AT5G42590	-0.0105894	0.00687447
AT5G42600	-0.021769	0.000336693
AT5G42800	-0.0406818	7.53866e-05
AT5G42980	-0.00566925	0.0138379
AT5G43150	0.01095	6.22784e-06
AT5G43350	0.0194362	2.02099e-06
AT5G43520	0.0320724	0.0189089
AT5G43540	0.0260499	0.038326
AT5G44390	-0.0161679	0.0247331
AT5G44550	0.00556318	0.0126496
AT5G44585	0.0288476	0.0225798
AT5G44610	0.0179726	0.0227944
AT5G45110	0.0155331	0.00278034
AT5G45380	0.0286587	2.60217e-08
AT5G45430	0.00636871	0.016052
AT5G46110	-0.0188903	4.45349e-05
AT5G46790	0.0178925	6.89971e-07
AT5G46890	0.0107329	0.00416649
AT5G46900	0.0159307	1.31562e-07
AT5G47020	-0.00784574	0.0496823
AT5G47080	0.0102762	0.0188855
AT5G47820	0.00650696	0.0470271
AT5G47980	0.0185588	0.00164442
AT5G47990	0.0104058	0.00227335
AT5G48070	0.0158231	0.0164935
AT5G48180	-0.00751809	0.0337138
AT5G48412	0.0102481	0.0103466
AT5G48430	0.0339208	0.0241249
AT5G48480	-0.0124627	0.00893514
AT5G48930	0.00465138	0.0123368
AT5G49100	-0.0176282	0.0302734
AT5G49270	0.0150307	0.000928969
AT5G49480	0.00824189	0.00111443
AT5G49770	0.0474473	0.022386
AT5G49780	0.0261533	0.00813778
AT5G50720	-0.014431	0.0363661
AT5G50760	0.0309989	0.000112929
AT5G50920	-0.00791172	0.000112929
AT5G51630	0.0109951	0.0231121
AT5G51780	0.0276359	1.96678e-14
AT5G51790	0.0164804	0.0387657
AT5G51890	-0.0148386	0.00445778
AT5G52310	-0.0525875	2.29093e-14
AT5G52790	0.0265586	0.0436244
AT5G52882	0.0114666	0.00187188
AT5G53110	0.0136162	0.0307519
AT5G53120	-0.013657	2.63198e-06
AT5G53250	0.0195294	0.00041817
AT5G53880	-0.01846	0.0481698
AT5G53890	-0.0160337	0.00181515
AT5G54060	-0.0496427	0.0245661
AT5G54270	-0.00962848	0.0036883
AT5G54390	-0.00894506	0.0302734
AT5G54500	0.00761122	0.0265604
AT5G54980	-0.0138388	0.00671045
AT5G55850	0.0092478	0.0311007
AT5G55970	0.020341	4.30183e-05
AT5G56080	0.013912	0.0209278
AT5G56630	0.0115152	4.30183e-05
AT5G56670	-0.00769312	0.0121403
AT5G57110	-0.0076105	0.000151065
AT5G57200	0.0835109	0.00143486
AT5G57220	0.0216995	0.00394487
AT5G57790	-0.0372403	0.00317005
AT5G58090	0.00985216	0.0193273
AT5G58900	0.0168119	0.0401765
AT5G58910	0.0246098	3.17869e-05
AT5G59080	0.033404	0.0259987
AT5G59220	-0.0216999	0.000136303
AT5G59320	-0.0404428	5.96055e-09
AT5G59450	0.0218178	0.00367858
AT5G59480	-0.0130789	0.000746627
AT5G59680	0.0314085	0.00421449
AT5G60490	0.0209133	0.0205191
AT5G60660	0.0262216	6.55522e-10
AT5G61010	0.0177128	1.2038e-05
AT5G61250	0.0149301	0.0182129
AT5G61340	0.011472	0.0281551
AT5G61480	-0.0145422	0.0124183
AT5G62350	-0.0149907	2.58e-13
AT5G62530	-0.0119844	6.89971e-07
AT5G62680	0.0133266	2.07314e-07
AT5G62790	-0.0137586	2.89014e-05
AT5G62920	0.0226224	5.10821e-08
AT5G62960	0.0152561	0.0449466
AT5G63350	-0.0350599	0.0469013
AT5G63410	0.0163675	0.00643574
AT5G63450	0.0180694	0.0088035
AT5G63580	-0.028538	0.00062826
AT5G63850	0.0252848	5.14763e-08
AT5G64080	-0.0222481	1.48733e-05
AT5G64100	0.0187836	0.000382459
AT5G64410	0.0151558	0.00799115
AT5G64810	0.0259714	0.0396401
AT5G65210	0.00682595	0.0162985
AT5G65380	0.00639382	0.0268884
AT5G65430	0.00822652	0.00383676
AT5G65470	-0.00987335	0.00315842
AT5G65990	-0.0214193	0.00360562
AT5G66060	-0.0124768	0.0493581
AT5G66190	-0.0192349	0.00930163
AT5G66200	0.0109851	0.00728714
AT5G66460	-0.0201894	0.00010086
AT5G66570	-0.01174	0.00453474
AT5G66690	0.00884439	0.00853147
AT5G66780	-0.043182	4.55815e-08
AT5G67370	-0.0166262	0.0300012
AT5G67400	0.0446064	1.50032e-06
AT5G67430	0.0266784	0.00603399
AT5G67480	-0.017088	0.000771961
AT5G67620	0.0246147	0.0125741
ATMG01390	0.0128287	0.0401611

## Sheet: DE - Agar Concentration
	log2FoldChange	padj
AT1G01020	0.0242257	0.000382602
AT1G01060	0.0110484	0.0181725
AT1G01190	0.0077752	0.0330994
AT1G01490	-0.0131927	0.0109393
AT1G01580	0.0317695	4.28866e-07
AT1G02090	-0.0103977	0.0111484
AT1G02145	0.011433	0.0341894
AT1G02220	0.0129288	0.000791249
AT1G02340	0.0442979	0.000412403
AT1G02400	-0.0163582	0.00695585
AT1G02850	-0.0127654	0.000374049
AT1G02920	0.0432657	2.42248e-22
AT1G02930	0.0406922	2.70254e-16
AT1G03220	-0.0101545	0.0461046
AT1G03400	0.0279119	0.0476491
AT1G03430	0.012527	0.0357481
AT1G03540	0.0351767	0.0498295
AT1G03870	-0.00797326	0.0412015
AT1G04240	0.0225163	0.00452259
AT1G04850	-0.00630661	0.0271104
AT1G05680	-0.0236593	1.05436e-12
AT1G05700	0.0278978	0.0143738
AT1G05880	0.0837273	0.000119122
AT1G06160	0.0490209	0.0296897
AT1G06400	-0.0106889	0.000147196
AT1G06640	-0.00939559	0.000731945
AT1G06840	0.00906405	0.0077411
AT1G07140	-0.00693197	0.0305312
AT1G07590	0.0124111	0.000267301
AT1G07610	-0.0206099	5.29029e-08
AT1G07790	-0.0101797	0.0419215
AT1G07940	-0.00714717	0.0463456
AT1G08650	0.0161327	0.000168247
AT1G08763	0.0841094	1.12943e-06
AT1G09467	0.0488217	0.0086091
AT1G09560	-0.0139849	3.72173e-06
AT1G09863	0.062542	0.0387094
AT1G09925	0.0213516	0.0405475
AT1G09995	0.0178554	0.0189905
AT1G10070	0.0350731	0.000237143
AT1G10480	0.0227097	0.00576172
AT1G10640	-0.010829	0.0490972
AT1G10820	0.0129988	0.00517484
AT1G10870	0.00936867	0.0365675
AT1G10970	-0.0227728	0.0017427
AT1G11190	-0.0242876	0.00108065
AT1G11300	0.0287612	0.0125043
AT1G11330	0.0153537	0.0194132
AT1G11410	0.0198161	0.00822104
AT1G11840	-0.00828677	0.00251914
AT1G12010	0.0131275	0.00202248
AT1G12420	0.0152641	0.00353397
AT1G12740	0.0195194	0.000735381
AT1G12900	0.0183027	0.0452592
AT1G13150	0.0407479	0.018487
AT1G13210	0.0100136	0.0395275
AT1G13440	-0.0101873	1.61554e-08
AT1G14120	-0.018424	3.56098e-05
AT1G14130	-0.0137887	0.0015298
AT1G14320	-0.00772902	0.0432719
AT1G14370	-0.0157902	0.0161202
AT1G15270	-0.00989806	0.00403657
AT1G15380	-0.00710468	0.00402357
AT1G15540	0.0102497	0.0477364
AT1G15625	0.0421781	0.00774831
AT1G17020	-0.0146434	0.00557839
AT1G17170	-0.0163559	5.66173e-08
AT1G17180	-0.0256082	4.86619e-35
AT1G18080	-0.00692752	0.0111484
AT1G18540	-0.0083532	0.0234669
AT1G19050	0.0325762	6.27961e-11
AT1G19170	0.0127701	0.0168874
AT1G19450	0.0135909	0.00695585
AT1G19570	-0.0127318	0.00137564
AT1G19960	0.0224648	6.76167e-05
AT1G20450	-0.00911521	0.0109393
AT1G21120	0.0228688	0.0131714
AT1G21130	0.0535323	1.05436e-12
AT1G21140	-0.018684	0.0258315
AT1G21440	-0.00664821	0.0449447
AT1G21550	0.0377731	0.0461046
AT1G21590	0.0107107	0.00974341
AT1G22840	-0.00753576	0.049391
AT1G23100	-0.0204522	0.0244606
AT1G23440	-0.00821685	0.0362474
AT1G24100	-0.00915684	0.00769208
AT1G24280	-0.0179262	1.05481e-09
AT1G24735	-0.0146166	0.0339296
AT1G25550	0.0203062	0.000265833
AT1G25560	0.0188719	0.00220367
AT1G26240	0.0630922	7.91333e-11
AT1G26380	0.0483529	7.82804e-05
AT1G26390	0.051769	2.82961e-11
AT1G26410	0.0474824	0.00161146
AT1G26450	-0.0129728	0.00295629
AT1G26700	0.026221	0.0195752
AT1G27020	0.0193148	0.0449447
AT1G27450	-0.00964723	0.0386595
AT1G27520	0.010489	0.00811167
AT1G27950	-0.0138188	0.0361943
AT1G28290	-0.0147053	0.000705141
AT1G28480	-0.0276522	0.00707024
AT1G30230	-0.00607127	0.0139046
AT1G30330	0.0110982	0.00264989
AT1G30500	0.0178357	0.0447811
AT1G30510	-0.0216604	3.85069e-23
AT1G30590	0.0116015	0.00433206
AT1G30970	0.0101411	0.0327881
AT1G31600	0.0119601	0.0021747
AT1G34180	0.0251286	0.0361943
AT1G34315	0.0207637	0.000615812
AT1G35140	-0.0285059	0.0472641
AT1G35180	0.0467112	0.0248259
AT1G35255	-0.0354572	0.0268812
AT1G35260	-0.014314	0.00475473
AT1G35515	0.0261456	1.54852e-06
AT1G35720	-0.00824531	0.00182636
AT1G37130	-0.0185687	9.83091e-09
AT1G42970	0.0223202	0.0127804
AT1G44800	-0.00804185	7.83005e-05
AT1G45229	0.0295388	0.0117416
AT1G47480	-0.00926322	0.0268057
AT1G48030	-0.008715	0.00357831
AT1G48120	0.0158151	0.0423942
AT1G48390	0.0335101	0.0126742
AT1G48600	-0.00587928	0.0368954
AT1G49030	0.0863323	2.29438e-05
AT1G49320	0.0126979	0.00637736
AT1G49980	0.0137179	0.043118
AT1G50730	0.0116611	0.0380425
AT1G51200	0.00626794	0.0193282
AT1G51890	0.022442	0.000705141
AT1G52060	0.0234149	0.00707024
AT1G52070	0.0137925	0.0002394
AT1G52155	0.0168708	0.0308928
AT1G53240	-0.00638717	0.00424969
AT1G53300	0.0113508	0.0150335
AT1G53390	0.0126574	0.0447811
AT1G53750	-0.00714515	0.00402357
AT1G54095	0.0201496	0.0456598
AT1G54410	-0.00771171	0.0452049
AT1G55210	-0.0085944	0.00855302
AT1G55850	-0.00955902	0.00322894
AT1G55920	-0.0186903	2.44797e-08
AT1G56340	-0.00893602	3.25212e-05
AT1G57600	0.0143082	0.00918477
AT1G58320	0.029774	3.31901e-06
AT1G58340	0.0295724	0.004654
AT1G58350	0.0100432	0.0121865
AT1G58360	-0.00860183	0.0292952
AT1G59960	-0.00840194	0.043118
AT1G60710	-0.00749025	0.0139046
AT1G60730	-0.0148309	0.000194881
AT1G60800	0.00891798	0.0251632
AT1G60950	-0.0120466	0.00894998
AT1G60960	-0.0140552	0.0246827
AT1G62300	-0.0124274	0.000778676
AT1G62770	-0.0144387	0.0412015
AT1G62790	-0.00830253	0.0381175
AT1G62975	0.0109917	0.00716391
AT1G63520	0.0314721	0.00429767
AT1G63720	0.0166659	0.000732579
AT1G63730	0.0348926	0.0098522
AT1G63940	-0.0117916	5.85754e-06
AT1G63980	-0.00807688	0.0281618
AT1G64060	0.0149437	7.40025e-06
AT1G64390	0.00712067	0.00902982
AT1G64590	0.0167748	0.000825669
AT1G64660	0.0191478	6.08781e-06
AT1G64750	-0.0102503	0.0388308
AT1G64760	-0.0176285	0.0462717
AT1G64910	0.02897	0.0207488
AT1G64940	-0.0180309	0.000585914
AT1G64950	-0.0118086	0.000316646
AT1G65040	0.00929154	0.0225274
AT1G65970	0.0309494	0.0189905
AT1G66580	-0.0123866	1.13498e-05
AT1G66700	0.0183528	0.000173448
AT1G66725	-0.0160478	0.000132335
AT1G66730	0.0193341	0.00048903
AT1G66800	-0.0123162	0.0329189
AT1G67000	0.0617944	0.0055102
AT1G67080	0.0132447	0.022686
AT1G67110	0.0356064	1.0628e-08
AT1G67350	-0.00897541	0.0209955
AT1G67560	-0.0135907	0.0108075
AT1G67785	-0.0108463	0.0412015
AT1G67980	0.0664572	3.77954e-21
AT1G68000	0.0115134	0.0029252
AT1G68070	0.00912584	0.0217701
AT1G68238	-0.0164901	0.0088307
AT1G68550	0.0112047	0.0339296
AT1G68670	0.0159476	0.00632242
AT1G68710	0.0146936	0.0014246
AT1G68740	0.0106966	0.0310265
AT1G68880	-0.0148985	0.0185198
AT1G69170	0.0158997	0.0192687
AT1G69530	-0.0127343	0.00295629
AT1G69620	-0.00860409	0.0361943
AT1G69850	0.0113124	0.00152561
AT1G70290	0.0118638	0.0067842
AT1G70780	-0.00712296	0.0303275
AT1G70850	-0.0100686	4.28866e-07
AT1G72140	-0.0147873	0.000319587
AT1G72500	0.0122593	0.00429211
AT1G72680	-0.0119191	9.19507e-05
AT1G72890	0.0325477	0.00194612
AT1G73010	0.0247071	0.00107939
AT1G73220	-0.0128866	0.000118173
AT1G73260	0.0267766	2.03641e-10
AT1G73430	0.00867717	0.0332942
AT1G73600	-0.0128709	0.000485771
AT1G73850	0.011593	0.0204043
AT1G74010	-0.0186772	0.033225
AT1G74100	-0.00915095	0.00295629
AT1G74560	-0.0116632	0.000230523
AT1G75040	0.0588951	0.0188942
AT1G75270	-0.00917771	0.0358606
AT1G75390	0.0125796	0.00608354
AT1G75750	0.0105815	0.0096176
AT1G75760	0.00986168	0.0434317
AT1G75850	0.00952933	0.0077411
AT1G76410	0.0384638	0.0177687
AT1G76680	-0.0119678	0.000104148
AT1G76690	-0.0128012	3.61463e-06
AT1G76800	-0.0125792	0.0285443
AT1G76930	-0.0144568	4.28263e-08
AT1G76990	0.00736917	0.000376357
AT1G77120	-0.0169695	0.00379641
AT1G77520	0.0105692	0.00707024
AT1G77530	0.022758	8.7716e-11
AT1G77690	0.0106666	0.000791249
AT1G77760	-0.0226808	5.81769e-10
AT1G78050	-0.012417	0.0243358
AT1G78290	0.0172488	0.00143448
AT1G78340	-0.0125927	0.0216505
AT1G78370	-0.0145581	0.000740834
AT1G78380	-0.0103992	3.31901e-06
AT1G78580	0.00719319	0.0485479
AT1G78680	0.00762654	0.0414306
AT1G79530	-0.00942459	5.85967e-06
AT1G79970	-0.0126696	0.0239365
AT1G80230	-0.0106831	0.00823884
AT1G80340	-0.0164019	0.00110066
AT2G01140	-0.00668277	0.00955701
AT2G01440	0.0123301	0.0385566
AT2G01520	-0.0107278	0.0134762
AT2G01610	-0.0175413	0.0224236
AT2G01650	-0.0121621	0.00344739
AT2G01818	0.0266394	0.00222667
AT2G01830	0.0112436	1.25655e-05
AT2G01950	0.0080187	0.0208325
AT2G02100	-0.00981059	0.0469787
AT2G02120	-0.0129617	0.0323853
AT2G03530	0.0215299	0.0472363
AT2G03730	0.013109	1.33906e-05
AT2G03810	0.0118479	0.0295037
AT2G03865	0.0338338	0.0268057
AT2G03890	0.0115495	0.000472811
AT2G04070	0.059911	1.08647e-05
AT2G04230	0.0281269	0.0457676
AT2G05760	0.0197447	0.0332942
AT2G07180	0.0125043	0.0116532
AT2G13360	0.024518	1.08798e-07
AT2G13810	0.0207851	0.00475473
AT2G14510	0.0284428	0.00327118
AT2G14890	-0.010014	0.0339296
AT2G14900	-0.0149794	0.0196689
AT2G15480	-0.0175437	3.22112e-05
AT2G15620	-0.0258795	2.74043e-23
AT2G16060	-0.0192848	0.00227561
AT2G16370	0.0122255	0.00452259
AT2G16750	0.0178223	2.49468e-05
AT2G16980	0.0101267	0.0368025
AT2G17430	0.0221555	1.5834e-05
AT2G17500	-0.00828154	0.0355647
AT2G17820	0.0148219	8.9948e-06
AT2G18150	-0.00906216	0.0096176
AT2G18440	0.00721017	0.014661
AT2G18860	0.0112763	0.0349447
AT2G19500	0.0656172	0.00475473
AT2G19740	-0.00950107	0.029949
AT2G19970	-0.0231363	5.51342e-06
AT2G19990	-0.0345854	0.0261059
AT2G20610	-0.00864028	0.0312167
AT2G20630	-0.00861506	0.00455921
AT2G20670	0.0208747	0.000678686
AT2G20760	-0.0062528	0.0125043
AT2G21140	-0.0319496	0.00898076
AT2G21210	-0.0319693	0.0287764
AT2G21560	0.013961	0.0339296
AT2G21880	0.0187181	0.0270331
AT2G22430	-0.00933199	0.0143951
AT2G22470	-0.0082446	0.0309976
AT2G22980	0.0447738	0.00273681
AT2G22990	0.0388674	0.00535505
AT2G24280	0.0159707	0.00231369
AT2G24550	0.00969832	0.00837826
AT2G24592	0.0187977	0.043118
AT2G24600	0.0488984	0.0361943
AT2G24720	0.0434414	9.29293e-06
AT2G24980	-0.026286	0.0228336
AT2G25010	0.013411	0.0177613
AT2G25110	-0.0101147	0.00747186
AT2G25440	0.0499754	0.0302741
AT2G25490	0.00709807	0.0273536
AT2G25590	0.00961203	0.00974341
AT2G25625	-0.0248009	0.0146435
AT2G25710	0.0123012	0.00234982
AT2G25810	-0.00980388	0.0035539
AT2G25900	0.0182696	0.000459545
AT2G26600	0.0095703	0.0227183
AT2G26670	-0.012517	0.00773575
AT2G27020	-0.0112849	0.0029252
AT2G27510	-0.0219145	4.36025e-17
AT2G28160	-0.0189098	0.000272715
AT2G28250	0.00891566	0.0229083
AT2G28470	0.0136303	0.000947625
AT2G28570	0.0217943	0.013185
AT2G28740	-0.0153812	0.0357481
AT2G28780	-0.0144274	8.52935e-05
AT2G28960	0.0175046	0.0033201
AT2G29060	0.0103057	0.0420753
AT2G29130	0.0151507	0.0332942
AT2G29350	0.0730247	3.71026e-24
AT2G29490	-0.0115947	0.00044842
AT2G29500	-0.016226	0.0239913
AT2G30140	-0.0165852	0.000214728
AT2G30750	0.0519694	6.44904e-05
AT2G30860	-0.00794825	0.0395325
AT2G31280	0.00892952	0.0270572
AT2G32300	-0.0100196	0.0125645
AT2G32990	0.0108049	0.00717055
AT2G33530	0.0107322	0.0477364
AT2G33550	-0.0169718	0.00044842
AT2G34400	-0.0467476	0.0165046
AT2G34480	-0.01136	0.0193282
AT2G34490	-0.0105498	0.0364053
AT2G34610	0.0167776	0.0293256
AT2G35240	-0.0122821	0.0448148
AT2G35790	-0.0128929	0.0134762
AT2G36255	-0.102871	1.36309e-06
AT2G36290	0.00694485	0.0495563
AT2G36530	-0.00519651	0.0218496
AT2G36580	-0.0103558	2.9746e-06
AT2G37440	0.0163346	0.00231369
AT2G37760	-0.0110005	0.000198148
AT2G37770	-0.0182277	0.0417019
AT2G37980	0.0194816	0.0208526
AT2G38120	0.0128664	0.000166109
AT2G38470	0.0115989	0.0447857
AT2G38530	-0.0142804	0.0428284
AT2G38860	-0.00859355	0.0287787
AT2G39040	0.0260578	0.000896557
AT2G39050	-0.0128535	0.00199361
AT2G39210	0.0172072	0.00475473
AT2G39310	-0.0199615	1.06695e-15
AT2G39390	-0.00924599	0.0487248
AT2G39510	-0.0159976	0.0097326
AT2G39530	0.0183607	0.0080839
AT2G39570	0.00821899	0.0287764
AT2G39681	0.0209905	0.00955479
AT2G39700	-0.0107284	3.61775e-05
AT2G39705	0.0212348	0.0311411
AT2G40230	0.0161947	0.0339296
AT2G40380	-0.0104096	0.0239365
AT2G40390	0.0208478	0.0047257
AT2G41110	-0.014722	0.0262816
AT2G41190	0.0221218	0.00418239
AT2G41380	-0.0241971	6.05548e-10
AT2G41730	-0.0383497	0.0449447
AT2G41870	0.0164631	0.016889
AT2G42680	-0.0102693	0.0097326
AT2G42840	-0.0169783	0.0234669
AT2G42910	-0.0121262	0.00044842
AT2G43000	0.0369406	0.00698889
AT2G43100	-0.0119809	0.000201566
AT2G43120	0.0171579	0.00270234
AT2G43570	0.0227225	0.00142808
AT2G43610	0.012868	0.0029252
AT2G44060	-0.00546408	0.0499795
AT2G44080	0.0408264	0.0353184
AT2G44090	0.0100321	0.0167186
AT2G44120	-0.00789093	0.0420753
AT2G44670	0.012026	0.000794342
AT2G44790	0.0072589	0.0447811
AT2G46390	-0.0161554	0.000219824
AT2G46660	0.0205577	0.00136879
AT2G46740	-0.0103842	0.0327025
AT2G46890	0.0100283	0.0212462
AT2G47010	-0.0154019	0.014522
AT2G47070	0.0109439	0.0130166
AT2G47110	-0.00909045	0.00594875
AT2G47500	0.00785734	0.0350919
AT2G47730	-0.0121016	5.85754e-06
AT2G47760	0.0113217	0.0237993
AT2G48080	-0.0209061	5.39216e-07
AT3G00880	0.019143	0.0449653
AT3G01100	0.00890093	0.0193282
AT3G01175	0.0394399	0.000552577
AT3G01280	-0.00716889	0.00837826
AT3G01513	-0.0128448	0.0227251
AT3G02040	0.0365452	6.72731e-05
AT3G02090	-0.00689841	0.00460819
AT3G02100	0.0159088	0.0353839
AT3G02120	-0.0168328	0.018487
AT3G02885	-0.0129265	0.0126729
AT3G03180	0.0196786	0.0305524
AT3G03890	-0.010745	0.0405475
AT3G03910	0.0426161	6.26462e-05
AT3G04120	-0.00803507	0.00115391
AT3G04530	0.0216726	0.0332942
AT3G04650	0.0172042	0.0340169
AT3G04720	0.0104183	0.00631264
AT3G04920	-0.00881408	0.0320956
AT3G05650	0.0229271	0.0214561
AT3G05890	0.0259298	1.32228e-06
AT3G06130	0.0102958	0.00325719
AT3G06330	0.0122527	0.0123388
AT3G06483	-0.0151916	0.0317673
AT3G06680	-0.0105957	0.0169995
AT3G06700	-0.00933705	0.0234669
AT3G07350	0.0213721	0.0226196
AT3G07480	-0.0110542	0.0018225
AT3G08030	-0.00941755	0.000159627
AT3G08610	-0.00975107	0.0339296
AT3G08860	-0.0155675	0.0210939
AT3G09270	-0.0155566	9.15203e-08
AT3G09390	0.0172058	0.000472811
AT3G09400	0.0208496	0.0449677
AT3G09455	0.0263352	0.0184947
AT3G09630	-0.00618173	0.0308928
AT3G09820	-0.0054126	0.0180131
AT3G10090	-0.0114529	0.0149579
AT3G10110	-0.0212122	0.0469648
AT3G10820	-0.0136015	0.0432202
AT3G10860	-0.0110577	0.0123388
AT3G10985	0.0120602	8.33138e-05
AT3G11280	0.0123263	0.000282813
AT3G12120	-0.00629545	0.0161069
AT3G12700	-0.0118731	0.00475473
AT3G12900	0.0683985	1.06894e-06
AT3G12920	0.012249	0.0133181
AT3G13650	-0.0113431	0.0122362
AT3G13784	-0.0359365	8.30399e-05
AT3G13930	-0.00713268	0.00154804
AT3G14310	-0.00733629	0.0490972
AT3G14570	0.0188871	1.97688e-05
AT3G14690	-0.00784293	0.0160452
AT3G15000	-0.00833617	0.0143951
AT3G15353	0.0139923	0.0134762
AT3G15354	0.0111873	0.0402541
AT3G15450	0.0165417	0.000776131
AT3G15630	0.0204172	0.00693943
AT3G15650	0.0169798	0.00379641
AT3G15950	-0.00570823	0.0226196
AT3G15990	0.0167451	8.86269e-05
AT3G16340	0.0103149	0.00502362
AT3G16400	-0.011885	2.73807e-10
AT3G16420	-0.012327	2.47489e-07
AT3G16450	-0.0102323	0.00175559
AT3G16690	0.0142188	0.0145422
AT3G17790	0.0160649	0.002074
AT3G19390	-0.0104221	0.0148997
AT3G19430	0.023391	0.0135903
AT3G19970	0.0215764	0.00252512
AT3G20898	0.0551943	0.00932386
AT3G21352	0.0818554	1.68504e-08
AT3G22160	-0.0224946	0.0214561
AT3G22630	-0.0107249	0.0447811
AT3G22845	0.00768297	0.0224077
AT3G22850	-0.0119002	4.99393e-07
AT3G23100	-0.0168784	0.0091135
AT3G23450	-0.0386125	0.042635
AT3G23600	-0.00752396	0.0237835
AT3G23800	0.0272689	0.00179528
AT3G24020	0.0405688	0.0349136
AT3G24310	0.0358404	0.00044471
AT3G24420	-0.0186002	0.0176014
AT3G25190	-0.0121698	0.000300337
AT3G25250	-0.013404	0.00441192
AT3G25585	0.0101515	0.00276266
AT3G25655	-0.0256206	0.0376237
AT3G25790	-0.0137922	0.0188942
AT3G26130	0.0299659	0.0309976
AT3G26135	0.0359008	0.0221874
AT3G26460	-0.0124917	0.0173534
AT3G26670	0.00974934	0.0300497
AT3G26920	0.0189519	0.00614566
AT3G26980	0.0131266	0.0494476
AT3G27060	-0.0111017	0.0391484
AT3G27240	-0.00687745	0.00509511
AT3G27380	-0.00870824	0.00115391
AT3G27400	-0.0184608	0.0309976
AT3G27430	-0.00779537	0.0127682
AT3G27890	-0.00766007	0.0283901
AT3G28050	0.00697591	0.0126729
AT3G28180	0.0111355	0.0268812
AT3G28210	-0.0288469	0.00894998
AT3G28510	0.011631	0.0404282
AT3G28740	-0.0144311	2.82038e-06
AT3G28940	-0.00680599	0.0224077
AT3G29240	0.0131088	0.0205695
AT3G29390	0.00920781	0.0108588
AT3G29410	0.00979438	0.0404954
AT3G30775	0.0158895	0.00219593
AT3G43720	-0.0193483	7.04873e-05
AT3G44190	-0.0107134	0.00925844
AT3G44310	-0.0103129	0.00038589
AT3G44320	-0.0113432	0.00197175
AT3G44540	0.0113838	0.000422815
AT3G44940	0.0123901	0.0259822
AT3G45130	0.0200546	2.78104e-06
AT3G45930	-0.012346	0.0469787
AT3G46320	-0.0132697	0.0420001
AT3G46700	-0.0203452	2.86996e-08
AT3G46900	-0.023588	0.000657436
AT3G47220	0.0183329	0.00231068
AT3G47380	-0.0216709	0.0272405
AT3G47480	0.0603439	9.10421e-05
AT3G47800	-0.0153999	0.044314
AT3G47980	-0.0123842	0.0297394
AT3G48100	0.0357083	2.08623e-11
AT3G48350	-0.0161142	0.00565498
AT3G48930	-0.00906613	0.0447857
AT3G48990	-0.00924042	0.0361943
AT3G49010	-0.0106596	0.00263438
AT3G49120	-0.00808638	0.0447857
AT3G49330	0.0184805	0.00227561
AT3G49810	0.0137013	0.0287787
AT3G49860	0.0144582	0.015276
AT3G49910	-0.00878494	0.00273681
AT3G49960	-0.032474	0.000675564
AT3G50620	0.0220686	0.000386507
AT3G50970	-0.00826537	0.0213409
AT3G51720	-0.00875185	0.0424083
AT3G51740	-0.00938781	0.0151981
AT3G51950	0.00655532	0.0319113
AT3G52930	-0.00697894	0.0185786
AT3G52960	-0.0146176	0.00565226
AT3G52990	-0.0064467	0.00648229
AT3G53230	-0.0113839	0.0297394
AT3G53570	0.0133947	0.0029252
AT3G53730	-0.010732	0.0220602
AT3G53830	0.0120614	0.00174941
AT3G54040	0.0165742	0.0018225
AT3G54110	-0.00665887	0.0213409
AT3G54260	-0.0131663	0.0037358
AT3G54500	0.0145697	1.33634e-06
AT3G54580	-0.0117323	0.0402541
AT3G54720	0.0108027	0.00725961
AT3G55430	-0.00775787	0.0209552
AT3G55750	-0.0104788	0.0178689
AT3G56020	-0.0152252	0.0482225
AT3G56040	0.0125472	0.0356724
AT3G56290	-0.0137471	0.00364195
AT3G56400	0.0293471	0.00452259
AT3G57020	-0.0107843	0.0105074
AT3G57040	0.0107199	0.0293256
AT3G57157	-0.0129435	0.0490972
AT3G57300	0.00982018	0.0433156
AT3G57470	0.0152431	0.00249196
AT3G57520	0.0105933	0.000948744
AT3G58610	-0.00819515	0.000343605
AT3G58900	0.0160025	0.0228336
AT3G59100	0.0144502	0.00282686
AT3G60070	0.0139891	0.000629133
AT3G60260	0.0115874	0.0457125
AT3G60415	0.059461	3.31901e-06
AT3G60700	0.0437253	0.00273681
AT3G60750	-0.0140604	5.66227e-10
AT3G61010	0.00921014	0.0308858
AT3G61060	0.0188823	0.0169995
AT3G61820	-0.00916958	0.0277834
AT3G61850	0.0090452	0.0442008
AT3G61898	0.0425487	0.0363147
AT3G62250	-0.0108872	0.0105074
AT3G62680	-0.0224979	0.00475473
AT3G62740	-0.0143373	0.0490972
AT3G62940	-0.0115958	0.0145255
AT3G63200	0.00724438	0.0293256
AT3G63380	0.0319623	1.26757e-07
AT3G63510	0.0251762	0.000445317
AT4G00330	-0.0109741	0.0410424
AT4G01070	-0.00796608	0.0339296
AT4G01390	-0.0200695	5.29029e-08
AT4G01450	0.0151441	9.15203e-08
AT4G01850	-0.00465921	0.0332942
AT4G01870	-0.00965364	0.0133953
AT4G01950	-0.0127837	0.0167186
AT4G02075	0.0214384	0.0179416
AT4G02380	-0.0164076	3.31901e-06
AT4G02580	-0.00984515	0.00260883
AT4G02620	-0.0157941	0.000525817
AT4G02810	0.0201179	0.0404282
AT4G02850	0.0168305	0.00494353
AT4G02940	-0.00990837	0.0117826
AT4G04340	0.00933925	0.00158212
AT4G04570	0.0297634	0.0277834
AT4G04745	-0.0262489	2.82038e-06
AT4G04990	0.0192429	0.00403657
AT4G05390	-0.0153292	2.21737e-07
AT4G07820	0.0267423	0.000769473
AT4G08410	-0.0297881	0.0252227
AT4G08555	-0.0238997	0.000168247
AT4G08920	0.00994213	0.0123387
AT4G09580	0.0128037	0.0234669
AT4G10040	-0.0134363	0.00104487
AT4G10480	-0.00908329	0.00468165
AT4G10500	0.027356	0.000422815
AT4G10750	-0.019501	0.00176654
AT4G11170	0.0600017	0.000468299
AT4G11211	-0.0186809	0.0311242
AT4G11650	0.0168907	1.4196e-07
AT4G11655	0.0433092	0.0107475
AT4G11840	0.0111589	0.0433871
AT4G12330	-0.0285617	0.00194055
AT4G12470	-0.068803	0.00174941
AT4G13180	-0.014191	0.000296016
AT4G13310	0.0268951	0.0457316
AT4G13520	-0.0130623	0.0364583
AT4G13860	-0.0125021	0.0341225
AT4G14060	-0.0171563	0.000336577
AT4G14580	0.0111197	0.00464902
AT4G14630	0.0326096	2.27643e-05
AT4G14800	-0.0102045	0.0138982
AT4G15233	0.0286813	0.0048867
AT4G15490	-0.0282235	8.1641e-07
AT4G15550	-0.0147636	0.000319587
AT4G15760	-0.00810794	0.0178676
AT4G15910	-0.00717724	0.0389976
AT4G16008	0.0298348	0.0092851
AT4G16260	0.010165	0.00572662
AT4G16370	0.017947	0.000147196
AT4G16450	-0.0120781	0.0216505
AT4G16920	0.0179165	0.00711171
AT4G17080	0.013215	0.0148997
AT4G17670	0.0213629	0.000992751
AT4G18100	-0.009501	0.0447857
AT4G18140	0.0149277	0.0283733
AT4G19160	0.00958675	0.00162728
AT4G19230	-0.0164004	0.000359617
AT4G19645	0.0360968	0.0412015
AT4G19660	0.0112812	0.00476094
AT4G19880	-0.00633659	0.0174062
AT4G19970	0.0422329	0.0174196
AT4G20270	0.00821486	0.0274116
AT4G20320	0.0145493	1.75424e-06
AT4G20840	0.0131961	0.0383054
AT4G21060	0.0140895	0.0168874
AT4G21580	-0.0104504	0.00231369
AT4G21760	0.021125	0.00194401
AT4G22120	0.00817444	0.042635
AT4G22530	-0.01147	0.0148997
AT4G22690	0.0399229	0.000219463
AT4G22930	-0.00954519	0.0204043
AT4G23670	-0.0149844	6.52558e-05
AT4G23700	0.0165812	0.00379614
AT4G24190	-0.00500482	0.0364093
AT4G24480	0.0165298	0.00260883
AT4G25100	-0.00828436	2.25887e-05
AT4G25250	0.0149413	0.0060233
AT4G25434	0.0134054	0.00455157
AT4G25820	-0.0226312	0.0228336
AT4G26230	-0.0135453	0.00452259
AT4G27310	0.0143275	0.0332942
AT4G27460	0.034492	0.0170732
AT4G28240	-0.0116193	0.021387
AT4G29110	0.022694	0.000948744
AT4G29140	0.0129048	0.0155503
AT4G29350	-0.0060737	0.0420753
AT4G29700	-0.00835563	0.0310265
AT4G29905	0.0172143	0.00213493
AT4G30010	-0.0107612	0.00315614
AT4G30140	0.016007	0.0105074
AT4G30270	-0.0111835	0.0177105
AT4G30810	-0.00992288	0.00433206
AT4G31290	-0.00784739	0.0292952
AT4G31510	0.0197272	0.0295
AT4G31840	-0.0108467	0.0264365
AT4G31910	-0.0181376	1.17582e-10
AT4G31920	0.0118515	0.000171473
AT4G31970	0.0524919	2.73807e-10
AT4G32480	0.028002	8.04287e-06
AT4G33050	0.0147207	0.0228336
AT4G33070	-0.0153456	0.00502362
AT4G33530	0.00788616	0.0402097
AT4G33720	0.0378718	0.000948744
AT4G33770	0.0119707	0.0438371
AT4G33960	-0.022205	0.0499795
AT4G34135	-0.0103094	1.46247e-05
AT4G34200	-0.00584134	0.0188942
AT4G34590	0.0142233	0.0022942
AT4G34670	-0.00638581	0.0201027
AT4G34710	-0.00682926	0.0128981
AT4G35030	0.0129704	0.0283733
AT4G35260	-0.00632081	0.0256517
AT4G35770	0.040891	0.00725961
AT4G35850	-0.00914225	0.0105074
AT4G36180	-0.013465	0.00760884
AT4G36430	-0.0121372	5.35434e-05
AT4G36830	-0.0194493	0.034291
AT4G36880	-0.0190966	0.000731945
AT4G36900	0.0145694	0.0495563
AT4G37160	0.0260088	4.1231e-06
AT4G37300	-0.0165142	0.000459545
AT4G37700	-0.0189234	0.00251914
AT4G37790	0.0105999	0.0311242
AT4G37910	-0.00751827	0.0156209
AT4G37950	0.042289	0.0106203
AT4G38080	-0.00945532	0.00704782
AT4G38370	-0.0213451	0.0449447
AT4G38420	-0.0379938	0.00174256
AT4G38770	-0.0191953	0.0117416
AT4G38960	0.0155484	0.0250971
AT4G38970	0.0255892	0.00575551
AT4G39090	-0.00843006	0.0292952
AT4G39200	-0.011037	0.00936385
AT4G39260	0.00878126	0.00184118
AT4G39730	-0.0116684	0.00142808
AT4G40090	-0.0283309	2.82038e-06
AT5G01600	-0.0142262	0.0111484
AT5G02420	-0.018435	0.0300972
AT5G02770	0.00659408	0.0481096
AT5G03760	0.0131897	0.000159627
AT5G03830	0.018757	0.0259209
AT5G04150	0.0281201	0.0252227
AT5G04960	-0.0247836	3.22112e-05
AT5G05250	0.025092	0.0193218
AT5G05390	0.0237056	0.0208324
AT5G05960	-0.0119385	0.0317673
AT5G06265	0.0162923	0.0250971
AT5G06300	0.0131846	0.0438371
AT5G06510	0.0232154	0.00227561
AT5G06630	-0.0260231	0.0188942
AT5G06640	-0.0266739	0.0287123
AT5G06845	0.0498878	0.00475473
AT5G07030	-0.00796673	0.00101066
AT5G07440	-0.00974299	0.000272715
AT5G07680	-0.0127753	0.00516566
AT5G08060	-0.00838458	0.0173765
AT5G08680	-0.00464887	0.0244606
AT5G09220	-0.0070987	0.00460819
AT5G09290	0.0203715	0.00347961
AT5G09870	0.0106369	0.0261728
AT5G10080	0.0148287	0.0319221
AT5G10100	0.0132829	0.00902982
AT5G10180	-0.0138363	0.00315614
AT5G10360	-0.00704925	0.0238751
AT5G11520	-0.00836986	0.00955479
AT5G11770	-0.0114893	0.000533349
AT5G11920	0.0161521	0.0169946
AT5G12030	-0.0874157	0.000171473
AT5G12420	0.0098992	0.0163157
AT5G12860	-0.0108432	5.03832e-05
AT5G12880	-0.0202254	0.0387138
AT5G13110	-0.0117701	2.43662e-05
AT5G13320	0.0704076	4.1263e-07
AT5G13420	-0.0178076	1.13964e-27
AT5G14070	0.0269571	0.0133953
AT5G14210	0.0133941	0.00092717
AT5G14330	-0.0167348	0.00476094
AT5G14570	-0.0134743	0.0412015
AT5G14650	-0.0208396	8.66114e-05
AT5G14700	0.0163941	0.033225
AT5G14730	-0.0179596	0.00032252
AT5G14880	0.0105557	0.00475473
AT5G15090	-0.00855862	0.0092484
AT5G15950	0.0108566	0.0185786
AT5G15970	-0.0137318	0.00902982
AT5G16000	0.0124419	0.00975243
AT5G16720	0.01299	0.0287764
AT5G16970	-0.0281315	4.99393e-07
AT5G17000	-0.00983007	0.0226196
AT5G18380	-0.00835377	0.0374184
AT5G18670	0.0195407	0.00189753
AT5G19120	0.026835	6.28505e-08
AT5G19250	-0.0100216	0.0259822
AT5G19440	-0.0119532	1.28305e-07
AT5G19970	-0.0102382	0.0404282
AT5G20000	-0.010294	0.00374454
AT5G20010	-0.007883	0.00864453
AT5G20020	-0.00751159	0.0288066
AT5G20150	0.0555381	4.86619e-35
AT5G20250	0.0188468	0.00180909
AT5G20360	0.0122842	0.0496271
AT5G21940	0.0325775	4.14795e-07
AT5G21950	0.0119264	0.0469787
AT5G22070	0.0103735	0.0472641
AT5G22650	-0.00581632	0.0212462
AT5G22890	-0.0136788	0.0150335
AT5G23820	-0.0132125	0.0055102
AT5G24735	0.00981435	0.0356724
AT5G24760	0.0100208	0.0048867
AT5G24770	-0.0153296	0.0123477
AT5G24780	-0.0199939	4.01384e-05
AT5G25250	0.0301046	0.0107475
AT5G25260	0.0525678	0.00319244
AT5G25460	-0.00583024	0.0496167
AT5G25560	0.00704891	0.0376237
AT5G26340	-0.0127659	0.015811
AT5G26920	0.0693715	3.12325e-18
AT5G27830	-0.0164207	0.0427985
AT5G28520	0.0433715	0.0252227
AT5G35190	-0.0208306	0.00955479
AT5G35620	-0.00864455	0.0234669
AT5G35680	-0.00891321	0.0167836
AT5G35690	-0.00774333	0.0257272
AT5G36150	-0.0254814	0.00157366
AT5G37780	-0.00686967	0.043118
AT5G38000	-0.014014	0.0283733
AT5G38020	-0.0106862	0.00178972
AT5G38030	-0.00808772	0.0105074
AT5G38540	0.0205318	0.00468165
AT5G38550	0.0166371	0.0131714
AT5G38910	0.0478407	0.000214728
AT5G39050	-0.035564	7.84718e-13
AT5G39120	0.0224798	0.00695585
AT5G39250	0.0190565	0.0239365
AT5G39850	0.0176326	0.000873247
AT5G39950	-0.0105496	0.0184947
AT5G40010	0.0338651	0.00143292
AT5G40370	-0.0130945	8.17176e-05
AT5G40640	0.0118184	0.00792864
AT5G40710	0.0208333	0.0295
AT5G40780	0.0174506	0.0111484
AT5G40850	-0.02193	5.33341e-23
AT5G41080	0.0181314	3.0893e-09
AT5G41670	-0.0271114	5.37579e-27
AT5G41750	0.0246272	0.0228447
AT5G42590	-0.0124673	0.000214728
AT5G42600	-0.0180238	0.00107124
AT5G42690	0.0113293	0.0295037
AT5G42790	-0.00776131	0.01509
AT5G42980	-0.0088454	0.00260883
AT5G43150	0.00758854	0.0137891
AT5G43230	-0.0540489	0.0144161
AT5G43260	-0.017023	0.0307152
AT5G43520	0.0250206	0.0029252
AT5G44530	0.0145526	6.82621e-07
AT5G44567	0.0527823	0.00260883
AT5G44585	0.0298294	0.0046303
AT5G44670	0.0100968	0.0048867
AT5G44750	0.0125617	0.0158573
AT5G45070	-0.0136787	0.0362392
AT5G45100	0.0104359	0.000533349
AT5G45110	0.012959	0.00324672
AT5G45130	0.00815858	0.0266757
AT5G46350	-0.0432268	0.0447811
AT5G46430	-0.00810005	0.0212462
AT5G46700	0.013466	0.00162219
AT5G47030	-0.00768982	0.00260483
AT5G47550	-0.0197522	0.0364093
AT5G47650	-0.0128977	0.0108058
AT5G47990	-0.0171615	6.08781e-06
AT5G48000	-0.0149047	7.26429e-06
AT5G48010	-0.0187755	1.41052e-15
AT5G48412	0.0108918	0.0287764
AT5G48657	-0.0172689	0.00717055
AT5G48850	-0.0222404	0.00201626
AT5G49480	-0.00932254	0.0296743
AT5G49780	0.0242695	0.00295644
AT5G49960	0.0137523	0.0130895
AT5G50010	0.0144383	0.000315764
AT5G50200	-0.0147411	0.0174196
AT5G50850	-0.00699958	0.000299019
AT5G51440	-0.0354314	0.0100809
AT5G51500	-0.0161841	0.0423942
AT5G51630	0.0142415	0.000386507
AT5G51780	0.0110388	0.0172983
AT5G51890	-0.0139076	0.00707024
AT5G51960	0.0229394	0.00959318
AT5G53330	-0.0101914	0.02711
AT5G54390	-0.00797948	0.0360046
AT5G54800	-0.00934639	0.000793345
AT5G55970	0.0223537	9.4744e-07
AT5G56080	-0.0176832	0.000173757
AT5G56090	-0.016827	1.44095e-05
AT5G56150	-0.0122761	0.0067842
AT5G56250	0.0114721	0.0239365
AT5G56670	-0.0124207	0.00342016
AT5G56710	-0.0122781	0.00662928
AT5G57010	-0.0159599	0.00251914
AT5G57220	0.0374001	1.27438e-07
AT5G57250	0.0184611	0.0244606
AT5G57625	-0.0251135	0.0131714
AT5G57655	0.0108753	0.00297354
AT5G57785	-0.0164439	0.00108065
AT5G58290	-0.00835293	0.00017642
AT5G59030	-0.018847	0.022755
AT5G59220	0.0128879	0.0205346
AT5G59320	-0.0186786	0.0463641
AT5G59520	-0.0106477	0.00801763
AT5G59780	0.0102075	0.00125388
AT5G59910	-0.0066207	0.0295
AT5G60170	0.00715019	0.0472544
AT5G60390	-0.00779699	0.00032252
AT5G60580	0.0105366	0.00359377
AT5G60660	0.0182219	0.00143292
AT5G60850	0.0128781	0.0035441
AT5G60900	0.0491391	0.00452259
AT5G61440	0.0236627	0.000253972
AT5G61640	-0.0102119	0.0449447
AT5G61820	-0.00841729	0.0234669
AT5G62130	0.0112439	0.0457316
AT5G62165	0.0117635	0.00695585
AT5G62350	-0.0107536	0.00273681
AT5G62630	0.0102486	9.19507e-05
AT5G62720	-0.0256549	2.08623e-11
AT5G62920	0.013379	0.00201564
AT5G63710	0.0108057	0.0191774
AT5G63790	-0.00747118	0.00760884
AT5G64080	-0.015462	0.00270234
AT5G64180	-0.010818	0.038201
AT5G64250	-0.0120438	2.18697e-05
AT5G64290	-0.00784465	0.0423942
AT5G64310	-0.0151535	0.00424361
AT5G64810	0.019516	0.0233805
AT5G64940	0.0107868	0.0208526
AT5G65207	-0.0112632	0.0273465
AT5G65260	-0.00950365	0.0498295
AT5G65360	-0.00890063	0.0176014
AT5G65390	-0.0142204	0.0163157
AT5G65640	-0.00893451	0.022008
AT5G65660	-0.0133414	2.15692e-05
AT5G65687	0.0149052	0.0272497
AT5G65790	0.00920131	0.00687888
AT5G65970	0.0100547	0.0449653
AT5G65980	-0.0162243	0.041417
AT5G66052	0.0497358	6.35999e-05
AT5G66400	0.0314815	0.0105544
AT5G66510	-0.00682456	0.0447811
AT5G66540	-0.0112344	0.0337869
AT5G66910	0.0128406	0.0193283
AT5G66985	-0.0138251	0.0106414
AT5G67420	-0.00845901	0.0131714
AT5G67500	-0.00917003	0.000533811
AT5G67600	-0.0144563	0.00203463
